# Supplementary material for: Quantitative control of noise in mammalian gene expression by dynamic histone regulation
Source: eLife. 2021 Aug 11;10:e65654. doi: 10.7554/eLife.65654 (PMC8357418; doi:10.7554/eLife.65654)
Supplement: Figure 1—figure supplement 2—source data 1. [file elife-65654-fig1-figsupp2-data1.xlsx]

## Sheet: Fig1S5_A
subpopulation	mean GFP	CV(GFP)	CV(mRuby)
1	124790	0.33599	0.97186
2	206250	0.073791	1.4626
3	252250	0.046362	1.6167
4	288940	0.033612	1.6255
5	320600	0.027543	1.5334
6	350340	0.023768	1.5286
7	378240	0.020483	1.5287
8	404500	0.01832	1.4839
9	429880	0.017226	1.3943
10	455610	0.016765	1.3902
11	482170	0.016074	1.3848
12	509560	0.015995	1.301
13	539100	0.0165	1.295
14	570800	0.01707	1.261
15	607060	0.018207	1.2751
16	648520	0.020324	1.2207
17	698840	0.023208	1.1996
18	763600	0.0282	1.1677
19	857690	0.040236	1.0915
20	1098300	0.17181	1.002

## Sheet: Fig1S5_B
mRuby	mRuby:experiment
1	1.9873e-05
1.1	0
1.2	0
1.3	9.9364e-06
1.4	0
1.5	0
1.6	9.9364e-06
1.7	9.9364e-06
1.8	4.9682e-05
1.9	6.9555e-05
2	3.9746e-05
2.1	8.9428e-05
2.2	0.00025835
2.3	0.00056638
2.4	0.00093402
2.5	0.0025437
2.6	0.0062103
2.7	0.013861
2.8	0.029531
2.9	0.055624
3	0.072188
3.1	0.068343
3.2	0.058347
3.3	0.050368
3.4	0.045141
3.5	0.044147
3.6	0.044217
3.7	0.044416
3.8	0.045022
3.9	0.044485
4	0.043025
4.1	0.042746
4.2	0.039567
4.3	0.039934
4.4	0.037043
4.5	0.034062
4.6	0.031429
4.7	0.030107
4.8	0.026163
4.9	0.02025
5	0.013851
5.1	0.0081876
5.2	0.0038056
5.3	0.0019078
5.4	0.00079491
5.5	0.00048688
5.6	0.00012917
5.7	9.9364e-06
5.8	0
5.9	0
6	0
6.1	0
6.2	0
6.3	0
6.4	0
6.5	0
6.6	0
6.7	0
6.8	0
6.9	0
7	0
7.1	0
7.2	0
7.3	0
7.4	0
7.5	0
7.6	0
7.7	0
7.8	0
7.9	0
8	0

## Sheet: Fig1S5_C
mRuby	histogram experiment GAVPO: subpopulation 1	histogram experiment GAVPO: subpopulation 3	histogram experiment GAVPO: subpopulation 5	histogram experiment GAVPO: subpopulation 7	histogram experiment GAVPO: subpopulation 9	histogram experiment GAVPO: subpopulation 11	histogram experiment GAVPO: subpopulation 13	histogram experiment GAVPO: subpopulation 15	histogram experiment GAVPO: subpopulation 17	histogram experiment GAVPO: subpopulation 19	histogram experiment GAVPO: subpopulation 20
1	0.00039746	0	0	0	0	0	0	0	0	0	0
1.2	0	0	0	0	0	0	0	0	0	0	0
1.4	0.00019873	0	0	0	0	0	0	0	0	0	0
1.6	0	0	0	0	0	0	0	0	0	0	0
1.8	0.00079491	0.00039746	0	0	0	0	0	0	0	0	0
2	0.0015898	0.00019873	0	0	0	0	0	0	0	0	0
2.2	0.0053657	0.0019873	0	0	0	0	0	0.00019873	0	0	0
2.4	0.018879	0.0059618	0.0025835	0.0025835	0.0011924	0	0	0	0	0	0
2.6	0.10234	0.031995	0.015302	0.0077504	0.0037758	0.0031797	0.0013911	0.00019873	0.00019873	0	0.00019873
2.8	0.33506	0.1556	0.097377	0.05465	0.037758	0.020469	0.015103	0.006558	0.0037758	0.00059618	0.00019873
3	0.37421	0.2965	0.22774	0.17051	0.12381	0.10234	0.074523	0.053855	0.029809	0.013116	0.0037758
3.2	0.10314	0.18839	0.16435	0.15918	0.13374	0.12619	0.099762	0.090223	0.075517	0.040143	0.016892
3.4	0.031598	0.094595	0.12103	0.11904	0.12182	0.097973	0.10095	0.097774	0.073529	0.057035	0.028418
3.6	0.015501	0.080286	0.097377	0.10175	0.11546	0.11526	0.10234	0.10056	0.082671	0.070151	0.041137
3.8	0.0083466	0.060016	0.089626	0.10095	0.10791	0.11447	0.11427	0.10592	0.10552	0.089825	0.059221
4	0.0019873	0.043124	0.066971	0.095787	0.095787	0.10771	0.10811	0.11228	0.11447	0.10811	0.079293
4.2	0.00019873	0.022655	0.055246	0.06717	0.093402	0.098768	0.11725	0.1097	0.11407	0.11288	0.091415
4.4	0.00039746	0.013514	0.039149	0.062401	0.077305	0.078895	0.096184	0.11089	0.11328	0.12281	0.11308
4.6	0	0.004372	0.019674	0.036367	0.056439	0.075715	0.086049	0.093998	0.10751	0.1246	0.12738
4.8	0	0.00039746	0.0035771	0.019674	0.027027	0.04531	0.060016	0.080286	0.10731	0.12818	0.14984
5	0	0	0	0.0019873	0.0039746	0.012122	0.020668	0.031002	0.058824	0.10036	0.15898
5.2	0	0	0	0.00019873	0.00059618	0.0013911	0.0033784	0.0059618	0.011725	0.027424	0.09837
5.4	0	0	0	0	0	0.00019873	0	0.00059618	0.0015898	0.0041733	0.026033
5.6	0	0	0	0	0	0	0	0	0.00019873	0.00059618	0.0055644
5.8	0	0	0	0	0	0	0	0	0	0	0.00019873
6	0	0	0	0	0	0	0	0	0	0	0
6.2	0	0	0	0	0	0	0	0	0	0	0
6.4	0	0	0	0	0	0	0	0	0	0	0
6.6	0	0	0	0	0	0	0	0	0	0	0
6.8	0	0	0	0	0	0	0	0	0	0	0
7	0	0	0	0	0	0	0	0	0	0	0
7.2	0	0	0	0	0	0	0	0	0	0	0
7.4	0	0	0	0	0	0	0	0	0	0	0
7.6	0	0	0	0	0	0	0	0	0	0	0
7.8	0	0	0	0	0	0	0	0	0	0	0
8	0	0	0	0	0	0	0	0	0	0	0

## Sheet: Fig1S5_E
mRuby	mRuby: empirical function
1	0.00031797
1.1	9.9364e-05
1.2	0.00012917
1.3	0.00014905
1.4	0.00015898
1.5	0.00014905
1.6	0.00024841
1.7	0.00026828
1.8	0.0003279
1.9	0.00040739
2	0.0004372
2.1	0.00057631
2.2	0.00068561
2.3	0.00084459
2.4	0.0010632
2.5	0.0012023
2.6	0.0020966
2.7	0.0027226
2.8	0.0038156
2.9	0.0052166
3	0.0072138
3.1	0.0099662
3.2	0.014189
3.3	0.018949
3.4	0.026401
3.5	0.035791
3.6	0.045042
3.7	0.05627
3.8	0.06871
3.9	0.080048
4	0.08903
4.1	0.095171
4.2	0.09371
4.3	0.087321
4.4	0.072089
4.5	0.058684
4.6	0.045618
4.7	0.030296
4.8	0.0203
4.9	0.011804
5	0.006409
5.1	0.0030306
5.2	0.0016892
5.3	0.00083466
5.4	0.00026828
5.5	0.00013911
5.6	2.9809e-05
5.7	2.9809e-05
5.8	3.9746e-05
5.9	9.9364e-06
6	0
6.1	0
6.2	0
6.3	0
6.4	0
6.5	0
6.6	0
6.7	0
6.8	0
6.9	0
7	0
7.1	0
7.2	0
7.3	0
7.4	0
7.5	0
7.6	0
7.7	0
7.8	0
7.9	0
8	0

## Sheet: Fig1S5_F
mRuby	histogram empirical function GAVPO: subpopulation 1	histogram empirical function GAVPO: subpopulation 3	histogram empirical function GAVPO: subpopulation 5	histogram empirical function GAVPO: subpopulation 7	histogram empirical function GAVPO: subpopulation 9	histogram empirical function GAVPO: subpopulation 11	histogram empirical function GAVPO: subpopulation 13	histogram empirical function GAVPO: subpopulation 15	histogram empirical function GAVPO: subpopulation 17	histogram empirical function GAVPO: subpopulation 19	histogram empirical function GAVPO: subpopulation 20
1	0.0069555	0	0	0	0	0	0	0	0	0	0
1.2	0.0053657	0	0	0	0	0	0	0	0	0	0
1.4	0.0063593	0	0	0	0	0	0	0	0	0	0
1.6	0.0093402	0	0	0	0	0	0	0	0	0	0
1.8	0.013712	0	0	0	0	0	0	0	0	0	0
2	0.017091	0	0	0	0	0	0	0	0	0	0
2.2	0.027226	0	0	0	0	0	0	0	0	0	0
2.4	0.043323	0	0	0	0	0	0	0	0	0	0
2.6	0.078696	0	0	0	0	0	0	0	0	0	0
2.8	0.14766	0.00059618	0.00019873	0	0	0	0	0	0	0	0
3	0.2194	0.0089428	0.00039746	0	0	0	0	0	0	0	0
3.2	0.24126	0.069952	0.010334	0.00099364	0	0	0	0	0	0	0
3.4	0.1399	0.25755	0.073331	0.01868	0.0035771	0.0015898	0	0	0	0	0
3.6	0.039348	0.37897	0.27524	0.12639	0.053259	0.019277	0.0055644	0.0015898	0.00019873	0	0
3.8	0.0037758	0.22118	0.375	0.33724	0.21463	0.13156	0.05942	0.027226	0.0059618	0.00059618	0
4	0.00059618	0.057035	0.20668	0.34599	0.37679	0.33128	0.23867	0.1413	0.053657	0.0073529	0.0019873
4.2	0	0.0057631	0.054452	0.1413	0.27266	0.3436	0.38772	0.33446	0.24046	0.077107	0.017886
4.4	0	0	0.004372	0.026828	0.071741	0.14944	0.24185	0.35254	0.37639	0.2657	0.097576
4.6	0	0	0	0.0023847	0.0073529	0.022258	0.058625	0.12599	0.24523	0.37738	0.28478
4.8	0	0	0	0.00019873	0	0.00099364	0.0075517	0.0157	0.070151	0.2186	0.33068
5	0	0	0	0	0	0	0.00059618	0.00099364	0.0075517	0.046701	0.18859
5.2	0	0	0	0	0	0	0	0.00019873	0.00039746	0.0063593	0.061804
5.4	0	0	0	0	0	0	0	0	0	0.00019873	0.013315
5.6	0	0	0	0	0	0	0	0	0	0	0.0023847
5.8	0	0	0	0	0	0	0	0	0	0	0.00099364
6	0	0	0	0	0	0	0	0	0	0	0
6.2	0	0	0	0	0	0	0	0	0	0	0
6.4	0	0	0	0	0	0	0	0	0	0	0
6.6	0	0	0	0	0	0	0	0	0	0	0
6.8	0	0	0	0	0	0	0	0	0	0	0
7	0	0	0	0	0	0	0	0	0	0	0
7.2	0	0	0	0	0	0	0	0	0	0	0
7.4	0	0	0	0	0	0	0	0	0	0	0
7.6	0	0	0	0	0	0	0	0	0	0	0
7.8	0	0	0	0	0	0	0	0	0	0	0
8	0	0	0	0	0	0	0	0	0	0	0

## Sheet: Fig1S5_H
mRuby	mRuby: hypothetical cooperativity
1	0
1.1	0
1.2	0
1.3	0
1.4	0
1.5	0
1.6	0
1.7	0
1.8	0
1.9	0
2	0
2.1	0
2.2	9.9364e-06
2.3	5.9618e-05
2.4	0.00031797
2.5	0.0015302
2.6	0.0044913
2.7	0.011983
2.8	0.023192
2.9	0.036467
3	0.04994
3.1	0.057095
3.2	0.053766
3.3	0.047198
3.4	0.041355
3.5	0.034807
3.6	0.033963
3.7	0.032472
3.8	0.031787
3.9	0.034231
4	0.033098
4.1	0.035195
4.2	0.036864
4.3	0.039229
4.4	0.045151
4.5	0.051153
4.6	0.056916
4.7	0.059499
4.8	0.055743
4.9	0.042568
5	0.027186
5.1	0.014199
5.2	0.0059122
5.3	0.0018879
5.4	0.00055644
5.5	0.00016892
5.6	9.9364e-06
5.7	0
5.8	0
5.9	0
6	0
6.1	0
6.2	0
6.3	0
6.4	0
6.5	0
6.6	0
6.7	0
6.8	0
6.9	0
7	0
7.1	0
7.2	0
7.3	0
7.4	0
7.5	0
7.6	0
7.7	0
7.8	0
7.9	0
8	0

## Sheet: Fig1S5_I
mRuby	histogram hypothetical cooperativity GAVPO: subpopulation 1	histogram hypothetical cooperativity GAVPO: subpopulation 3	histogram hypothetical cooperativity GAVPO: subpopulation 5	histogram hypothetical cooperativity GAVPO: subpopulation 7	histogram hypothetical cooperativity GAVPO: subpopulation 9	histogram hypothetical cooperativity GAVPO: subpopulation 11	histogram hypothetical cooperativity GAVPO: subpopulation 13	histogram hypothetical cooperativity GAVPO: subpopulation 15	histogram hypothetical cooperativity GAVPO: subpopulation 17	histogram hypothetical cooperativity GAVPO: subpopulation 19	histogram hypothetical cooperativity GAVPO: subpopulation 20
1	0	0	0	0	0	0	0	0	0	0	0
1.2	0	0	0	0	0	0	0	0	0	0	0
1.4	0	0	0	0	0	0	0	0	0	0	0
1.6	0	0	0	0	0	0	0	0	0	0	0
1.8	0	0	0	0	0	0	0	0	0	0	0
2	0	0	0	0	0	0	0	0	0	0	0
2.2	0.00019873	0	0	0	0	0	0	0	0	0	0
2.4	0.0055644	0.0035771	0.00039746	0	0	0	0	0	0	0	0
2.6	0.062599	0.045906	0.012917	0.00039746	0	0	0	0	0	0	0
2.8	0.22993	0.20469	0.083665	0.0059618	0	0	0	0	0	0	0
3	0.38156	0.3754	0.27583	0.049086	0.0015898	0	0	0	0	0	0
3.2	0.25	0.2812	0.37321	0.21224	0.015501	0	0	0	0	0	0
3.4	0.062599	0.080286	0.20529	0.37361	0.10592	0.0031797	0	0	0	0	0
3.6	0.0073529	0.0085453	0.044714	0.26471	0.30862	0.036566	0.00039746	0	0	0	0
3.8	0.00019873	0.00039746	0.0037758	0.081876	0.35016	0.18959	0.016097	0.00059618	0	0	0
4	0	0	0.00019873	0.011526	0.17468	0.37321	0.11109	0.010533	0.0013911	0.00019873	0.00019873
4.2	0	0	0	0.00059618	0.039348	0.29074	0.31081	0.079491	0.014706	0.0051669	0.0031797
4.4	0	0	0	0	0.0037758	0.091415	0.35453	0.27007	0.10592	0.047695	0.036566
4.6	0	0	0	0	0.00039746	0.014905	0.17269	0.38593	0.3122	0.22099	0.19237
4.8	0	0	0	0	0	0.00039746	0.032591	0.19952	0.36506	0.3899	0.38752
5	0	0	0	0	0	0	0.0017886	0.048887	0.16634	0.26113	0.28339
5.2	0	0	0	0	0	0	0	0.0047695	0.031598	0.06558	0.087043
5.4	0	0	0	0	0	0	0	0.00019873	0.0027822	0.008744	0.008744
5.6	0	0	0	0	0	0	0	0	0	0.00059618	0.00099364
5.8	0	0	0	0	0	0	0	0	0	0	0
6	0	0	0	0	0	0	0	0	0	0	0
6.2	0	0	0	0	0	0	0	0	0	0	0
6.4	0	0	0	0	0	0	0	0	0	0	0
6.6	0	0	0	0	0	0	0	0	0	0	0
6.8	0	0	0	0	0	0	0	0	0	0	0
7	0	0	0	0	0	0	0	0	0	0	0
7.2	0	0	0	0	0	0	0	0	0	0	0
7.4	0	0	0	0	0	0	0	0	0	0	0
7.6	0	0	0	0	0	0	0	0	0	0	0
7.8	0	0	0	0	0	0	0	0	0	0	0
8	0	0	0	0	0	0	0	0	0	0	0
