# Supplementary material for: Quantitative control of noise in mammalian gene expression by dynamic histone regulation
Source: eLife. 2021 Aug 11;10:e65654. doi: 10.7554/eLife.65654 (PMC8357418; doi:10.7554/eLife.65654)
Supplement: Figure 1—figure supplement 3—source data 1. [file elife-65654-fig1-figsupp3-data1.xlsx]

## Sheet: Fig1S2A
log10(mR)
1	0.0017257	0.0012736	0.00060293	0.00081183	0.00023648	0.00053657	9.0209e-05	0
1.1	0.00047937	0.00035923	0.00021925	0.00024355	1.6892e-05	0.00011924	1.8042e-05	0
1.2	0.0006072	0.00047353	0.00021925	0.0001786	0.00013513	0.00013911	1.8042e-05	0
1.3	0.00084689	0.00070213	0.00034714	0.0001786	0.00015202	0.00018879	5.4125e-05	0
1.4	0.0011505	0.00097972	0.00071255	0.00034097	0.00027027	0.0002186	7.2167e-05	2.3286e-05
1.5	0.0016299	0.001241	0.00091353	0.00081183	0.00033783	0.00038752	3.6083e-05	0
1.6	0.0024128	0.0021064	0.0015713	0.0011853	0.00055742	0.00061606	0.00014433	0
1.7	0.0041705	0.0035433	0.0022473	0.0020458	0.00079391	0.00096383	0.00014433	2.3286e-05
1.8	0.0066952	0.0056497	0.0037089	0.0029388	0.0010304	0.0017389	0.00027063	2.3286e-05
1.9	0.012591	0.010156	0.0069976	0.005764	0.0019594	0.0028617	0.0006495	2.3286e-05
2	0.023489	0.019774	0.013867	0.011122	0.0042905	0.0054551	0.00097425	9.3142e-05
2.1	0.047825	0.038797	0.027735	0.020523	0.0085303	0.0099165	0.001714	0.00023286
2.2	0.089866	0.075226	0.051797	0.043677	0.016081	0.018621	0.0042939	0.00037257
2.3	0.15123	0.12794	0.095555	0.078342	0.030456	0.032731	0.0079023	0.001141
2.4	0.20992	0.18399	0.14392	0.12018	0.048513	0.049672	0.012124	0.0018861
2.5	0.21696	0.19307	0.17172	0.14644	0.062398	0.061586	0.017843	0.0030038
2.6	0.14496	0.14475	0.15091	0.1377	0.070033	0.059221	0.021217	0.0038654
2.7	0.061551	0.080288	0.10021	0.098654	0.064931	0.05316	0.021452	0.0038188
2.8	0.016123	0.039891	0.060055	0.066051	0.057448	0.047516	0.022462	0.0041681
2.9	0.0037231	0.02095	0.037381	0.048158	0.050337	0.042657	0.023382	0.0050064
3	0.0010866	0.013161	0.026876	0.035526	0.047617	0.041902	0.024519	0.0058913
3.1	0.00046339	0.0097809	0.022856	0.031759	0.0488	0.04212	0.02782	0.0073815
3.2	0.00028762	0.007152	0.017613	0.026855	0.047313	0.04211	0.032692	0.0092211
3.3	9.5874e-05	0.0055028	0.014379	0.023024	0.045928	0.043343	0.034857	0.012295
3.4	4.7937e-05	0.0038699	0.011401	0.019516	0.046097	0.044247	0.03879	0.013995
3.5	3.1958e-05	0.0026942	0.0084227	0.014824	0.043344	0.043223	0.041803	0.017045
3.6	3.1958e-05	0.0020737	0.0071255	0.01333	0.04103	0.042279	0.04597	0.020142
3.7	0	0.0014533	0.0052071	0.011138	0.038074	0.040809	0.051166	0.025474
3.8	0	0.0011267	0.0039464	0.0092549	0.036385	0.039795	0.051599	0.030271
3.9	0	0.00073479	0.0035079	0.0071441	0.034999	0.038116	0.05611	0.038608
4	0	0.00035923	0.0022473	0.0056016	0.030827	0.03597	0.058257	0.046688
4.1	0	0.0003429	0.0019001	0.0053256	0.028665	0.03279	0.059141	0.054116
4.2	0	0.0001143	0.0012789	0.0043677	0.024696	0.031041	0.059393	0.063756
4.3	0	0.00026126	0.0011693	0.0028739	0.021486	0.02808	0.059538	0.073676
4.4	0	9.7972e-05	0.00069428	0.001851	0.017804	0.024295	0.061757	0.088904
4.5	0	8.1643e-05	0.00036541	0.0010716	0.012736	0.018293	0.055839	0.10171
4.6	0	1.6329e-05	0.00023752	0.0006657	0.0075843	0.011397	0.0422	0.10586
4.7	0	1.6329e-05	5.4812e-05	0.00025979	0.004527	0.0063792	0.029841	0.0944
4.8	0	0	1.8271e-05	0.00011366	0.0019932	0.0030902	0.017537	0.077727
4.9	0	0	0	8.1183e-05	0.0010135	0.001401	0.0094719	0.049715
5	0	0	0	4.871e-05	0.0004054	0.00057631	0.0041135	0.024496
5.1	0	0	0	1.6237e-05	0.00013513	0.00040739	0.0016598	0.0099895
5.2	0	0	0	0	3.3783e-05	1.9873e-05	0.0007758	0.0033997
5.3	0	0	0	0	0	9.9364e-06	0.00018042	0.0013273
5.4	0	0	0	0	0	0	9.0209e-05	0.00020957
5.5	0	0	0	0	0	0	1.8042e-05	2.3286e-05
5.6	0	0	0	0	0	0	0	0
5.7	0	0	0	0	0	0	0	0
5.8	0	0	0	0	0	0	0	0
5.9	0	0	0	0	0	0	0	0
6	0	0	0	0	0	0	0	0
6.1	0	0	0	0	0	0	0	0
6.2	0	0	0	0	0	0	0	0
6.3	0	0	0	0	0	0	0	0
6.4	0	0	0	0	0	0	0	0
6.5	0	0	0	0	0	0	0	0
6.6	0	0	0	0	0	0	0	0
6.7	0	0	0	0	0	0	0	0
6.8	0	0	0	0	0	0	0	0
6.9	0	0	0	0	0	0	0	0
7	0	0	0	0	0	0	0	0
7.1	0	0	0	0	0	0	0	0
7.2	0	0	0	0	0	0	0	0
7.3	0	0	0	0	0	0	0	0
7.4	0	0	0	0	0	0	0	0
7.5	0	0	0	0	0	0	0	0
7.6	0	0	0	0	0	0	0	0
7.7	0	0	0	0	0	0	0	0
7.8	0	0	0	0	0	0	0	0
7.9	0	0	0	0	0	0	0	0
8	0	0	0	0	0	0	0	0

## Sheet: Fig1S2B
log10(mR)
1	0.000954	0.00030394	0.00048456	0.00036298	0.00011342	9.4782e-05	0	2.5291e-05
1.1	0.00022714	0.0001169	0.00013845	4.5372e-05	6.8053e-05	0	0	0
1.2	0.00024986	0.00018704	0.0001846	0.0001588	2.2684e-05	0	0	0
1.3	0.00054514	0.0001169	6.9223e-05	0.00022686	0.00018148	7.1087e-05	0	0
1.4	0.00068143	0.00039746	0.00032304	0.0003176	9.0738e-05	0.00014217	0	2.5291e-05
1.5	0.00090857	0.00030394	0.00043841	0.00022686	0.00038564	2.3696e-05	0	2.5291e-05
1.6	0.001431	0.00077153	0.00083068	0.00045372	0.00038564	0.00023696	2.4123e-05	0
1.7	0.0023623	0.0014028	0.0015691	0.0012024	0.00049906	0.00030804	0.00014474	2.5291e-05
1.8	0.0045202	0.0020574	0.0023305	0.00152	0.001225	0.00068717	4.8246e-05	5.0582e-05
1.9	0.0087905	0.0043486	0.0047995	0.0039701	0.0018148	0.00094782	0.00043422	0.00015175
2	0.017694	0.0095623	0.010037	0.0083031	0.0039925	0.0026539	0.00057895	0.00022762
2.1	0.038478	0.021065	0.023098	0.018829	0.0094141	0.0059476	0.0012785	0.00053111
2.2	0.076048	0.052137	0.051456	0.039065	0.020348	0.012725	0.0025329	0.00091047
2.3	0.14914	0.10974	0.10483	0.082713	0.041082	0.026966	0.006079	0.0013404
2.4	0.23119	0.18828	0.18933	0.1488	0.075789	0.047581	0.011458	0.0020233
2.5	0.24929	0.24967	0.23335	0.19877	0.10836	0.07066	0.017851	0.0023268
2.6	0.15673	0.20567	0.19034	0.18721	0.11365	0.077864	0.024437	0.0032878
2.7	0.050017	0.09899	0.095667	0.11382	0.10145	0.073646	0.028103	0.0035154
2.8	0.0082226	0.029903	0.038904	0.060345	0.083048	0.067935	0.029623	0.00478
2.9	0.0014537	0.010077	0.01786	0.037364	0.066579	0.063315	0.033579	0.0056146
3	0.00059057	0.0049331	0.010291	0.023162	0.056416	0.056703	0.035196	0.0062721
3.1	0.00018171	0.0036706	0.0067839	0.01833	0.050949	0.058504	0.041226	0.0089782
3.2	0.000159	0.0022211	0.005284	0.014383	0.044915	0.055732	0.045979	0.010066
3.3	4.5429e-05	0.0011456	0.0037611	0.011661	0.039675	0.050898	0.052227	0.013859
3.4	4.5429e-05	0.0010287	0.0025151	0.0080989	0.034412	0.047557	0.052371	0.015402
3.5	0	0.00072477	0.0014306	0.0059891	0.030533	0.045969	0.056183	0.017855
3.6	0	0.00039746	0.0014306	0.0042196	0.025202	0.041894	0.059198	0.024026
3.7	2.2714e-05	0.00039746	0.00073838	0.0032668	0.020847	0.037368	0.062744	0.02653
3.8	0	0.00016366	0.00083068	0.0022005	0.017694	0.033885	0.062262	0.031993
3.9	2.2714e-05	2.338e-05	0.00043841	0.0016788	0.013769	0.026894	0.061659	0.038948
4	0	4.676e-05	0.00025382	0.0010889	0.010616	0.023151	0.062141	0.047193
4.1	0	7.0139e-05	0.00011537	0.0009755	0.0080757	0.020307	0.058064	0.055286
4.2	0	2.338e-05	4.6149e-05	0.00061252	0.0063517	0.016919	0.050369	0.06434
4.3	0	2.338e-05	2.3074e-05	0.00040835	0.0049679	0.012819	0.044652	0.075948
4.4	0	2.338e-05	0	0.0001588	0.0039471	0.009028	0.036884	0.09216
4.5	0	0	2.3074e-05	4.5372e-05	0.0017467	0.0058054	0.029671	0.098179
4.6	0	0	0	0	0.00088469	0.0028435	0.017176	0.098786
4.7	0	0	0	2.2686e-05	0.00034027	0.0012322	0.0091668	0.093627
4.8	0	0	0	0	0.00015879	0.000545	0.0043904	0.073546
4.9	0	0	0	0	0	0.00011848	0.0016645	0.047243
5	0	0	0	0	0	2.3696e-05	0.00045834	0.02347
5.1	0	0	0	0	0	0	0.00012062	0.008523
5.2	0	0	0	0	0	0	2.4123e-05	0.0023015
5.3	0	0	0	0	0	0	0	0.00048053
5.4	0	0	0	0	0	0	0	0.00012645
5.5	0	0	0	0	0	0	0	0
5.6	0	0	0	0	0	0	0	0
5.7	0	0	0	0	0	0	0	0
5.8	0	0	0	0	0	0	0	0
5.9	0	0	0	0	0	0	0	0
6	0	0	0	0	0	0	0	0
6.1	0	0	0	0	0	0	0	0
6.2	0	0	0	0	0	0	0	0
6.3	0	0	0	0	0	0	0	0
6.4	0	0	0	0	0	0	0	0
6.5	0	0	0	0	0	0	0	0
6.6	0	0	0	0	0	0	0	0
6.7	0	0	0	0	0	0	0	0
6.8	0	0	0	0	0	0	0	0
6.9	0	0	0	0	0	0	0	0
7	0	0	0	0	0	0	0	0
7.1	0	0	0	0	0	0	0	0
7.2	0	0	0	0	0	0	0	0
7.3	0	0	0	0	0	0	0	0
7.4	0	0	0	0	0	0	0	0
7.5	0	0	0	0	0	0	0	0
7.6	0	0	0	0	0	0	0	0
7.7	0	0	0	0	0	0	0	0
7.8	0	0	0	0	0	0	0	0
7.9	0	0	0	0	0	0	0	0
8	0	0	0	0	0	0	0	0

## Sheet: Fig1S2C
log10(mR)
1	0.000954	0.00057558	0.00079874	0.00036797	0.00020471	0.00020015	4.5855e-05	2.5291e-05
1.1	0.00022714	0.0001771	0	0.00010823	4.5491e-05	0	0	0
1.2	0.00024986	0.00024351	0.00012953	8.6582e-05	4.5491e-05	2.5018e-05	2.2927e-05	0
1.3	0.00054514	0.00030993	0.00036699	0.00043291	0.00020471	2.5018e-05	2.2927e-05	0
1.4	0.00068143	0.00050916	0.00032381	0.00030304	0.0002502	2.5018e-05	2.2927e-05	2.5291e-05
1.5	0.00090857	0.00050916	0.00077715	0.00034633	0.00015922	5.0036e-05	4.5855e-05	2.5291e-05
1.6	0.001431	0.0011733	0.0010578	0.00064936	0.00038667	0.00022516	6.8782e-05	0
1.7	0.0023623	0.0017931	0.0015975	0.0016667	0.00054589	0.00017513	4.5855e-05	2.5291e-05
1.8	0.0045202	0.0031878	0.0030223	0.0022295	0.0011145	0.00032524	9.1709e-05	5.0582e-05
1.9	0.0087905	0.0060214	0.0058071	0.0046754	0.0023428	0.00087563	0.00016049	0.00015175
2	0.017694	0.012264	0.01306	0.010433	0.005004	0.0022016	0.00052733	0.00022762
2.1	0.038478	0.027207	0.026898	0.021213	0.01044	0.0039028	0.0013756	0.00053111
2.2	0.076048	0.057735	0.058826	0.04736	0.023769	0.0086563	0.0027054	0.00091047
2.3	0.14914	0.11782	0.11692	0.097686	0.049517	0.018989	0.0051587	0.0013404
2.4	0.23119	0.2003	0.19733	0.16516	0.090709	0.034875	0.010501	0.0020233
2.5	0.24929	0.24077	0.24008	0.21929	0.13329	0.05524	0.015499	0.0023268
2.6	0.15673	0.18799	0.19038	0.19574	0.14589	0.068825	0.021345	0.0032878
2.7	0.050017	0.086846	0.086696	0.1094	0.12585	0.072778	0.023386	0.0035154
2.8	0.0082226	0.028358	0.029424	0.050261	0.094552	0.073403	0.027261	0.00478
2.9	0.0014537	0.010737	0.01101	0.025065	0.071238	0.073879	0.029622	0.0056146
3	0.00059057	0.0057558	0.0059366	0.014243	0.051063	0.064172	0.034185	0.0062721
3.1	0.00018171	0.0033649	0.0038426	0.010325	0.043876	0.065973	0.039618	0.0089782
3.2	0.000159	0.0023023	0.0018781	0.0076409	0.035619	0.063596	0.045557	0.010066
3.3	4.5429e-05	0.0015054	0.0017054	0.0045888	0.026589	0.061294	0.052664	0.013859
3.4	4.5429e-05	0.0010847	0.00097144	0.0030737	0.021904	0.056841	0.054407	0.015402
3.5	0	0.00048703	0.00038858	0.0022511	0.016468	0.051537	0.05819	0.017855
3.6	0	0.00030993	0.00012953	0.0016234	0.01301	0.044032	0.063646	0.024026
3.7	2.2714e-05	0.0001771	0.00021588	0.0013637	0.0094166	0.038878	0.065939	0.02653
3.8	0	0.00019924	0.00021588	0.00069266	0.0073695	0.030472	0.063486	0.031993
3.9	2.2714e-05	8.855e-05	8.635e-05	0.00075759	0.0058683	0.02757	0.063646	0.038948
4	0	0.00011069	4.3175e-05	0.00045456	0.0045263	0.021966	0.06156	0.047193
4.1	0	6.6413e-05	8.635e-05	0.0002381	0.0030024	0.018163	0.058946	0.055286
4.2	0	0	0	6.4936e-05	0.0022973	0.01436	0.052137	0.06434
4.3	0	2.2138e-05	0	0.00010823	0.0018196	0.010383	0.046565	0.075948
4.4	0	0	0	0.00010823	0.001069	0.0079307	0.038472	0.09216
4.5	0	0	0	0	0.00034118	0.0045533	0.030195	0.098179
4.6	0	0	0	0	0.00013647	0.0024017	0.017218	0.098786
4.7	0	0	0	0	4.5491e-05	0.00080058	0.0095149	0.093627
4.8	0	0	0	0	2.2745e-05	0.00037527	0.0044021	0.073546
4.9	0	0	0	0	0	2.5018e-05	0.001261	0.047243
5	0	0	0	0	0	0	0.00041269	0.02347
5.1	0	0	0	0	0	0	4.5855e-05	0.008523
5.2	0	0	0	0	0	0	2.2927e-05	0.0023015
5.3	0	0	0	0	0	0	0	0.00048053
5.4	0	0	0	0	0	0	0	0.00012645
5.5	0	0	0	0	0	0	0	0
5.6	0	0	0	0	0	0	0	0
5.7	0	0	0	0	0	0	0	0
5.8	0	0	0	0	0	0	0	0
5.9	0	0	0	0	0	0	0	0
6	0	0	0	0	0	0	0	0
6.1	0	0	0	0	0	0	0	0
6.2	0	0	0	0	0	0	0	0
6.3	0	0	0	0	0	0	0	0
6.4	0	0	0	0	0	0	0	0
6.5	0	0	0	0	0	0	0	0
6.6	0	0	0	0	0	0	0	0
6.7	0	0	0	0	0	0	0	0
6.8	0	0	0	0	0	0	0	0
6.9	0	0	0	0	0	0	0	0
7	0	0	0	0	0	0	0	0
7.1	0	0	0	0	0	0	0	0
7.2	0	0	0	0	0	0	0	0
7.3	0	0	0	0	0	0	0	0
7.4	0	0	0	0	0	0	0	0
7.5	0	0	0	0	0	0	0	0
7.6	0	0	0	0	0	0	0	0
7.7	0	0	0	0	0	0	0	0
7.8	0	0	0	0	0	0	0	0
7.9	0	0	0	0	0	0	0	0
8	0	0	0	0	0	0	0	0

## Sheet: Fig1S2D
log10(mR)
1	0.000954	0.00035765	0.00054158	0.0001097	0.00010579	0	0	2.5291e-05
1.1	0.00022714	4.7686e-05	0.00016483	2.194e-05	0	0	2.8359e-05	0
1.2	0.00024986	0.00021459	0.00016483	8.7762e-05	2.1157e-05	0	0	0
1.3	0.00054514	0.00021459	0.00028257	8.7762e-05	4.2315e-05	0	0	0
1.4	0.00068143	0.00052455	0.00030611	0.00017552	0	2.6943e-05	0	2.5291e-05
1.5	0.00090857	0.00057223	0.00035321	0.00013164	4.2315e-05	2.6943e-05	0	2.5291e-05
1.6	0.001431	0.00054839	0.00075351	0.00046075	0.00016926	2.6943e-05	0	0
1.7	0.0023623	0.0010729	0.0013422	0.00052657	0.00025389	5.3885e-05	5.6718e-05	2.5291e-05
1.8	0.0045202	0.0029327	0.0020957	0.0010751	0.0002962	8.0828e-05	2.8359e-05	5.0582e-05
1.9	0.0087905	0.0044586	0.0042149	0.0019966	0.00071935	0.0001886	0	0.00015175
2	0.017694	0.0093703	0.009254	0.0043661	0.0012483	0.00045802	0.00025523	0.00022762
2.1	0.038478	0.021244	0.019968	0.0088859	0.0024966	0.0011046	0.0006239	0.00053111
2.2	0.076048	0.046708	0.042785	0.021107	0.0064318	0.0026404	0.0011911	0.00091047
2.3	0.14914	0.092559	0.091057	0.043442	0.013646	0.0050652	0.0027225	0.0013404
2.4	0.23119	0.15794	0.15402	0.086818	0.027631	0.012932	0.0043106	0.0020233
2.5	0.24929	0.20562	0.20639	0.12927	0.045806	0.018698	0.0068346	0.0023268
2.6	0.15673	0.17813	0.18357	0.15578	0.061081	0.026027	0.010578	0.0032878
2.7	0.050017	0.10613	0.11338	0.13386	0.07276	0.033463	0.012932	0.0035154
2.8	0.0082226	0.056675	0.057031	0.10637	0.080186	0.040602	0.015938	0.00478
2.9	0.0014537	0.034525	0.034803	0.080543	0.086533	0.049655	0.021581	0.0056146
3	0.00059057	0.022746	0.02237	0.057725	0.079128	0.055205	0.024786	0.0062721
3.1	0.00018171	0.017048	0.018084	0.046689	0.08501	0.064581	0.0344	0.0089782
3.2	0.000159	0.012851	0.01175	0.03618	0.080821	0.074873	0.043219	0.010066
3.3	4.5429e-05	0.0090603	0.0086183	0.024924	0.076378	0.077352	0.04736	0.013859
3.4	4.5429e-05	0.0062707	0.0057926	0.018474	0.064043	0.078699	0.05547	0.015402
3.5	0	0.003648	0.0037675	0.014459	0.053147	0.078753	0.058788	0.017855
3.6	0	0.0029804	0.0024254	0.0089078	0.041553	0.069162	0.066275	0.024026
3.7	2.2714e-05	0.0019551	0.0016718	0.0060556	0.0329	0.066036	0.068147	0.02653
3.8	0	0.0014067	0.0012009	0.0042784	0.025791	0.058223	0.071323	0.031993
3.9	2.2714e-05	0.00069145	0.00061223	0.002567	0.019655	0.047473	0.073649	0.038948
4	0	0.00059608	0.00042385	0.0017552	0.013964	0.038366	0.069905	0.047193
4.1	0	0.00052455	0.00037675	0.0010751	0.0099862	0.029825	0.067126	0.055286
4.2	0	0.00028612	0.00018838	0.00078985	0.0075743	0.025649	0.060093	0.06434
4.3	0	2.3843e-05	0.00014128	0.00061433	0.0046969	0.017405	0.055811	0.075948
4.4	0	7.1529e-05	4.7094e-05	0.00024134	0.002962	0.012744	0.04597	0.09216
4.5	0	0	2.3547e-05	0.0001097	0.0017349	0.0078672	0.034683	0.098179
4.6	0	0	2.3547e-05	4.3881e-05	0.00080398	0.0043378	0.022999	0.098786
4.7	0	0	0	0	0.00033852	0.0014549	0.013868	0.093627
4.8	0	0	0	0	2.1157e-05	0.00072745	0.0062957	0.073546
4.9	0	0	0	0	2.1157e-05	0.00016166	0.0023538	0.047243
5	0	0	0	0	0	0	0.00022687	0.02347
5.1	0	0	0	0	0	5.3885e-05	0.00017015	0.008523
5.2	0	0	0	0	0	0	0	0.0023015
5.3	0	0	0	0	0	0	0	0.00048053
5.4	0	0	0	0	0	0	0	0.00012645
5.5	0	0	0	0	0	0	0	0
5.6	0	0	0	0	0	0	0	0
5.7	0	0	0	0	0	0	0	0
5.8	0	0	0	0	0	0	0	0
5.9	0	0	0	0	0	0	0	0
6	0	0	0	0	0	0	0	0
6.1	0	0	0	0	0	0	0	0
6.2	0	0	0	0	0	0	0	0
6.3	0	0	0	0	0	0	0	0
6.4	0	0	0	0	0	0	0	0
6.5	0	0	0	0	0	0	0	0
6.6	0	0	0	0	0	0	0	0
6.7	0	0	0	0	0	0	0	0
6.8	0	0	0	0	0	0	0	0
6.9	0	0	0	0	0	0	0	0
7	0	0	0	0	0	0	0	0
7.1	0	0	0	0	0	0	0	0
7.2	0	0	0	0	0	0	0	0
7.3	0	0	0	0	0	0	0	0
7.4	0	0	0	0	0	0	0	0
7.5	0	0	0	0	0	0	0	0
7.6	0	0	0	0	0	0	0	0
7.7	0	0	0	0	0	0	0	0
7.8	0	0	0	0	0	0	0	0
7.9	0	0	0	0	0	0	0	0
8	0	0	0	0	0	0	0	0

## Sheet: Fig1S2E
log10(mR)
1	0.000954	0.00051227	0.00028044	0.0001486	0	0.00010622	2.6573e-05	2.5291e-05
1.1	0.00022714	0.00014636	0.00017846	5.9441e-05	0	0	2.6573e-05	0
1.2	0.00024986	0.00012197	0.00022945	5.9441e-05	0	0	2.6573e-05	0
1.3	0.00054514	7.3181e-05	0.00020396	2.972e-05	0	5.3111e-05	7.9719e-05	0
1.4	0.00068143	0.00041469	0.00022945	2.972e-05	0	2.6555e-05	0	2.5291e-05
1.5	0.00090857	0.00048788	0.00025495	8.9161e-05	0	5.3111e-05	7.9719e-05	2.5291e-05
1.6	0.001431	0.00082939	0.00056088	0.00032692	3.4548e-05	0.00015933	5.3146e-05	0
1.7	0.0023623	0.0013173	0.0011728	0.00059441	0.00010364	5.3111e-05	0	2.5291e-05
1.8	0.0045202	0.0027321	0.0017336	0.00092133	0.00017274	0.00029211	2.6573e-05	5.0582e-05
1.9	0.0087905	0.0046836	0.0031613	0.0016643	0.00044913	0.00092944	0.00013287	0.00015175
2	0.017694	0.011099	0.0060422	0.0028532	0.00089826	0.0013012	0.00010629	0.00022762
2.1	0.038478	0.023199	0.013895	0.0063007	0.0019002	0.0027618	0.00055804	0.00053111
2.2	0.076048	0.049959	0.03118	0.012334	0.0044222	0.0064264	0.0015944	0.00091047
2.3	0.14914	0.10087	0.061926	0.026451	0.0083607	0.01264	0.0027902	0.0013404
2.4	0.23119	0.1712	0.10904	0.047196	0.016307	0.022439	0.0058727	0.0020233
2.5	0.24929	0.22015	0.15134	0.070883	0.029884	0.035213	0.008344	0.0023268
2.6	0.15673	0.19322	0.15802	0.084644	0.041562	0.042914	0.0098852	0.0032878
2.7	0.050017	0.10655	0.12831	0.091866	0.050199	0.04788	0.012861	0.0035154
2.8	0.0082226	0.051276	0.094432	0.092282	0.054448	0.053881	0.016635	0.00478
2.9	0.0014537	0.025467	0.068784	0.088567	0.065918	0.059405	0.018867	0.0056146
3	0.00059057	0.014929	0.049969	0.084614	0.068786	0.061901	0.023836	0.0062721
3.1	0.00018171	0.0098795	0.03763	0.081463	0.081016	0.073612	0.031144	0.0089782
3.2	0.000159	0.0052203	0.030619	0.076768	0.093833	0.080994	0.040232	0.010066
3.3	4.5429e-05	0.0027077	0.020319	0.066782	0.094317	0.083729	0.052721	0.013859
3.4	4.5429e-05	0.0013904	0.013104	0.052754	0.096113	0.088509	0.062234	0.015402
3.5	0	0.00082939	0.0075719	0.041906	0.085922	0.082561	0.073395	0.017855
3.6	0	0.00031712	0.0044616	0.028799	0.070789	0.070558	0.085592	0.024026
3.7	2.2714e-05	0.00021954	0.0027024	0.018367	0.052479	0.060945	0.093245	0.02653
3.8	0	7.3181e-05	0.0014022	0.0095997	0.037208	0.04294	0.089312	0.031993
3.9	2.2714e-05	7.3181e-05	0.00066286	0.0062413	0.02256	0.029609	0.087771	0.038948
4	0	2.4394e-05	0.00025495	0.002972	0.010675	0.017766	0.076903	0.047193
4.1	0	2.4394e-05	0.00017846	0.0011294	0.0066678	0.0098786	0.066327	0.055286
4.2	0	0	7.6484e-05	0.00065385	0.0031093	0.005258	0.051632	0.06434
4.3	0	0	2.5495e-05	0.00038636	0.0011746	0.0029211	0.036857	0.075948
4.4	0	0	2.5495e-05	0.00023776	0.00044913	0.0014606	0.02466	0.09216
4.5	0	0	0	2.972e-05	0.00017274	0.00058422	0.014323	0.098179
4.6	0	0	2.5495e-05	0	3.4548e-05	0.000239	0.007281	0.098786
4.7	0	0	0	0	3.4548e-05	0	0.0029496	0.093627
4.8	0	0	0	0	0	0	0.0013818	0.073546
4.9	0	0	0	0	0	0	0.00018601	0.047243
5	0	0	0	0	0	0	5.3146e-05	0.02347
5.1	0	0	0	0	0	0	0	0.008523
5.2	0	0	0	0	0	0	0	0.0023015
5.3	0	0	0	0	0	0	0	0.00048053
5.4	0	0	0	0	0	0	0	0.00012645
5.5	0	0	0	0	0	0	0	0
5.6	0	0	0	0	0	0	0	0
5.7	0	0	0	0	0	0	0	0
5.8	0	0	0	0	0	0	0	0
5.9	0	0	0	0	0	0	0	0
6	0	0	0	0	0	0	0	0
6.1	0	0	0	0	0	0	0	0
6.2	0	0	0	0	0	0	0	0
6.3	0	0	0	0	0	0	0	0
6.4	0	0	0	0	0	0	0	0
6.5	0	0	0	0	0	0	0	0
6.6	0	0	0	0	0	0	0	0
6.7	0	0	0	0	0	0	0	0
6.8	0	0	0	0	0	0	0	0
6.9	0	0	0	0	0	0	0	0
7	0	0	0	0	0	0	0	0
7.1	0	0	0	0	0	0	0	0
7.2	0	0	0	0	0	0	0	0
7.3	0	0	0	0	0	0	0	0
7.4	0	0	0	0	0	0	0	0
7.5	0	0	0	0	0	0	0	0
7.6	0	0	0	0	0	0	0	0
7.7	0	0	0	0	0	0	0	0
7.8	0	0	0	0	0	0	0	0
7.9	0	0	0	0	0	0	0	0
8	0	0	0	0	0	0	0	0

## Sheet: Fig1S2F
log10(mR)
1	0.0037198	0.00073438	0.00075586	0.00041849	0.00014948	9.9532e-05	5.2296e-05	2.5291e-05
1.1	0.00090339	0.00027539	8.3984e-05	9.2997e-05	9.9656e-05	0	0	0
1.2	0.0017005	0.00022949	0.00016797	9.2997e-05	9.9656e-05	4.9766e-05	0	0
1.3	0.0015942	0.00055079	0.00012598	9.2997e-05	0.00014948	9.9532e-05	0	0
1.4	0.002285	0.00073438	0.00037793	0.00037199	9.9656e-05	0.0001493	0	2.5291e-05
1.5	0.0032416	0.00059669	0.00096582	9.2997e-05	0.00029897	0.00019906	0	2.5291e-05
1.6	0.0054203	0.0013311	0.0010498	0.00032549	0.00024914	0.00019906	0.00015689	0
1.7	0.010044	0.0020196	0.0015117	0.00055798	0.00039862	0.00019906	0.00015689	2.5291e-05
1.8	0.015836	0.0038096	0.0028135	0.00088347	0.00089691	0.00034836	0.00015689	5.0582e-05
1.9	0.027155	0.0080323	0.0040732	0.0018599	0.0011959	0.00099532	0.00015689	0.00015175
2	0.053194	0.013127	0.0084824	0.0040454	0.0022921	0.0018413	0.00036607	0.00022762
2.1	0.094112	0.028779	0.016923	0.0091602	0.0052818	0.0041306	0.00094132	0.00053111
2.2	0.15847	0.050581	0.036491	0.018088	0.0098161	0.0058226	0.002301	0.00091047
2.3	0.22367	0.087483	0.059041	0.030271	0.016094	0.012093	0.0041314	0.0013404
2.4	0.22282	0.12361	0.084824	0.049986	0.022174	0.017468	0.0069553	0.0020233
2.5	0.12918	0.13802	0.10208	0.069422	0.030644	0.019807	0.0078444	0.0023268
2.6	0.038368	0.12402	0.10662	0.081187	0.041557	0.026874	0.010564	0.0032878
2.7	0.0053141	0.10075	0.10196	0.082628	0.046838	0.033542	0.013492	0.0035154
2.8	0.0017005	0.081517	0.096918	0.092672	0.056007	0.039614	0.016055	0.00478
2.9	0.00058455	0.068298	0.086672	0.092207	0.068464	0.044939	0.01846	0.0056146
3	0.00037198	0.051912	0.073486	0.090765	0.074144	0.061262	0.022121	0.0062721
3.1	0.00015942	0.042227	0.065046	0.086301	0.089192	0.070668	0.032162	0.0089782
3.2	5.3141e-05	0.028549	0.053876	0.081745	0.09577	0.085399	0.042307	0.010066
3.3	0.00010628	0.018405	0.039641	0.07012	0.098311	0.10013	0.050047	0.013859
3.4	0	0.012301	0.025741	0.053427	0.09263	0.10122	0.063016	0.015402
3.5	0	0.0060128	0.015453	0.036083	0.081369	0.10068	0.07222	0.017855
3.6	0	0.0034424	0.0078525	0.023389	0.066869	0.089131	0.079437	0.024026
3.7	0	0.0016524	0.0038633	0.012508	0.045194	0.069772	0.087125	0.02653
3.8	0	0.00045899	0.0019316	0.0056263	0.026758	0.051807	0.096433	0.031993
3.9	0	0.00041309	0.00062988	0.0031619	0.014649	0.031203	0.089844	0.038948
4	0	9.1798e-05	0.00025195	0.001116	0.0074244	0.015427	0.085242	0.047193
4.1	0	4.5899e-05	0.00016797	0.00060448	0.0028402	0.007863	0.067775	0.055286
4.2	0	0	4.1992e-05	0.00055798	0.0012955	0.0044789	0.052819	0.06434
4.3	0	0	0	9.2997e-05	0.00049828	0.0017418	0.037182	0.075948
4.4	0	0	8.3984e-05	4.6499e-05	0.00014948	0.00049766	0.019663	0.09216
4.5	0	0	0	0	4.9828e-05	9.9532e-05	0.011923	0.098179
4.6	0	0	0	0	0	0.0001493	0.0051773	0.098786
4.7	0	0	0	0	0	0	0.0025625	0.093627
4.8	0	0	0	0	0	0	0.00073214	0.073546
4.9	0	0	0	0	4.9828e-05	0	0.00031377	0.047243
5	0	0	0	0	0	0	5.2296e-05	0.02347
5.1	0	0	0	0	0	0	0	0.008523
5.2	0	0	0	0	0	0	5.2296e-05	0.0023015
5.3	0	0	0	0	0	0	0	0.00048053
5.4	0	0	0	0	0	0	0	0.00012645
5.5	0	0	0	0	0	0	0	0
5.6	0	0	0	0	0	0	0	0
5.7	0	0	0	0	0	0	0	0
5.8	0	0	0	0	0	0	0	0
5.9	0	0	0	0	0	0	0	0
6	0	0	0	0	0	0	0	0
6.1	0	0	0	0	0	0	0	0
6.2	0	0	0	0	0	0	0	0
6.3	0	0	0	0	0	0	0	0
6.4	0	0	0	0	0	0	0	0
6.5	0	0	0	0	0	0	0	0
6.6	0	0	0	0	0	0	0	0
6.7	0	0	0	0	0	0	0	0
6.8	0	0	0	0	0	0	0	0
6.9	0	0	0	0	0	0	0	0
7	0	0	0	0	0	0	0	0
7.1	0	0	0	0	0	0	0	0
7.2	0	0	0	0	0	0	0	0
7.3	0	0	0	0	0	0	0	0
7.4	0	0	0	0	0	0	0	0
7.5	0	0	0	0	0	0	0	0
7.6	0	0	0	0	0	0	0	0
7.7	0	0	0	0	0	0	0	0
7.8	0	0	0	0	0	0	0	0
7.9	0	0	0	0	0	0	0	0
8	0	0	0	0	0	0	0	0

## Sheet: Fig1S2H
2.382	2.4717	2.5619	2.6535	2.747	2.8425	2.9402	3.0395	3.1396	3.2386	3.3343	3.4248	3.5091	3.5861	3.6562	3.7199	3.7777	3.8299	3.8771	3.9195	3.9574	3.9912	4.0213	4.0479	4.0714	4.0921	4.1104	4.1266	4.141	4.154	4.1659	4.177	4.1878	4.1983	4.2088	4.2192	4.2295	4.2397	4.2497	4.2597	4.2695	4.2792	4.2887	4.2981	4.3074	4.3165	4.3254	4.3342	4.3428	4.3512
2.3825	2.4706	2.5593	2.6493	2.7412	2.8354	2.9316	3.0298	3.1288	3.227	3.3221	3.4123	3.4965	3.5738	3.6444	3.7086	3.7671	3.82	3.8679	3.9109	3.9494	3.9837	4.0141	4.0409	4.0646	4.0854	4.1037	4.1199	4.1344	4.1473	4.1592	4.1703	4.1809	4.1914	4.2018	4.2121	4.2223	4.2325	4.2425	4.2524	4.2622	4.2719	4.2815	4.2909	4.3003	4.3095	4.3185	4.3275	4.3363	4.3449
2.3831	2.4695	2.5566	2.6451	2.7355	2.8282	2.9231	3.0201	3.118	3.2154	3.3099	3.3999	3.484	3.5615	3.6325	3.6974	3.7565	3.8101	3.8587	3.9024	3.9414	3.9761	4.0069	4.034	4.0578	4.0787	4.0971	4.1133	4.1277	4.1407	4.1525	4.1635	4.1741	4.1845	4.1949	4.2051	4.2152	4.2253	4.2352	4.2451	4.2549	4.2646	4.2742	4.2837	4.2932	4.3025	4.3117	4.3208	4.3298	4.3387
2.3836	2.4684	2.5539	2.6408	2.7298	2.821	2.9146	3.0103	3.1073	3.2038	3.2978	3.3874	3.4715	3.5493	3.6207	3.6861	3.7459	3.8003	3.8495	3.8938	3.9334	3.9686	3.9997	4.027	4.051	4.072	4.0905	4.1067	4.1211	4.134	4.1458	4.1568	4.1673	4.1777	4.1879	4.198	4.2081	4.2181	4.228	4.2378	4.2476	4.2573	4.267	4.2766	4.2861	4.2955	4.3048	4.3141	4.3233	4.3325
2.3841	2.4673	2.5513	2.6366	2.7241	2.8139	2.9061	3.0006	3.0965	3.1922	3.2856	3.375	3.4591	3.537	3.6089	3.6749	3.7353	3.7904	3.8403	3.8853	3.9255	3.9611	3.9925	4.0201	4.0442	4.0654	4.0839	4.1001	4.1145	4.1273	4.1391	4.15	4.1605	4.1708	4.1809	4.191	4.201	4.2109	4.2208	4.2306	4.2404	4.2501	4.2598	4.2694	4.279	4.2885	4.298	4.3075	4.3169	4.3262
2.3846	2.4663	2.5486	2.6325	2.7184	2.8067	2.8977	2.991	3.0858	3.1807	3.2735	3.3626	3.4466	3.5248	3.5971	3.6637	3.7248	3.7805	3.8312	3.8768	3.9175	3.9536	3.9853	4.0131	4.0375	4.0587	4.0772	4.0935	4.1078	4.1207	4.1324	4.1433	4.1537	4.1639	4.174	4.184	4.1939	4.2037	4.2135	4.2233	4.2331	4.2428	4.2526	4.2623	4.2719	4.2816	4.2912	4.3008	4.3104	4.32
2.3851	2.4652	2.546	2.6283	2.7127	2.7996	2.8892	2.9813	3.0752	3.1692	3.2615	3.3502	3.4342	3.5126	3.5854	3.6525	3.7143	3.7707	3.822	3.8683	3.9096	3.9461	3.9781	4.0062	4.0307	4.0521	4.0706	4.0869	4.1012	4.1141	4.1258	4.1366	4.147	4.1571	4.1671	4.177	4.1868	4.1966	4.2064	4.2161	4.2259	4.2356	4.2454	4.2551	4.2649	4.2746	4.2844	4.2942	4.304	4.3138
2.3856	2.4641	2.5434	2.6241	2.7071	2.7926	2.8808	2.9718	3.0645	3.1578	3.2495	3.3379	3.4219	3.5005	3.5737	3.6414	3.7038	3.761	3.8129	3.8598	3.9017	3.9386	3.971	3.9993	4.024	4.0454	4.064	4.0803	4.0947	4.1075	4.1191	4.1299	4.1402	4.1503	4.1602	4.17	4.1797	4.1895	4.1992	4.2089	4.2187	4.2284	4.2382	4.248	4.2579	4.2677	4.2777	4.2876	4.2976	4.3077
2.3861	2.4631	2.5408	2.62	2.7014	2.7855	2.8725	2.9622	3.054	3.1464	3.2376	3.3257	3.4096	3.4885	3.562	3.6303	3.6934	3.7512	3.8039	3.8514	3.8938	3.9311	3.9639	3.9924	4.0173	4.0388	4.0575	4.0738	4.0881	4.1009	4.1125	4.1233	4.1335	4.1435	4.1533	4.163	4.1727	4.1824	4.1921	4.2018	4.2115	4.2213	4.2311	4.241	4.2509	4.2609	4.2709	4.281	4.2912	4.3015
2.3866	2.462	2.5382	2.6159	2.6959	2.7785	2.8642	2.9527	3.0435	3.1351	3.2257	3.3135	3.3974	3.4765	3.5505	3.6193	3.683	3.7415	3.7949	3.843	3.8859	3.9237	3.9568	3.9856	4.0106	4.0322	4.0509	4.0672	4.0815	4.0943	4.1059	4.1166	4.1268	4.1367	4.1464	4.1561	4.1657	4.1753	4.185	4.1947	4.2044	4.2142	4.224	4.2339	4.244	4.254	4.2642	4.2745	4.2849	4.2954
2.3871	2.461	2.5357	2.6118	2.6903	2.7716	2.8559	2.9433	3.0331	3.1239	3.2139	3.3014	3.3853	3.4646	3.5389	3.6084	3.6727	3.7319	3.7859	3.8346	3.8781	3.9163	3.9497	3.9788	4.0039	4.0256	4.0444	4.0607	4.075	4.0878	4.0993	4.11	4.1201	4.1299	4.1396	4.1492	4.1587	4.1683	4.1779	4.1876	4.1973	4.2071	4.217	4.227	4.237	4.2472	4.2576	4.268	4.2786	4.2894
2.3876	2.46	2.5331	2.6078	2.6848	2.7647	2.8478	2.934	3.0227	3.1127	3.2022	3.2894	3.3732	3.4527	3.5275	3.5975	3.6625	3.7223	3.777	3.8263	3.8703	3.909	3.9427	3.972	3.9973	4.0191	4.0379	4.0542	4.0685	4.0813	4.0928	4.1034	4.1135	4.1232	4.1328	4.1423	4.1518	4.1613	4.1709	4.1805	4.1902	4.2001	4.21	4.22	4.2302	4.2405	4.251	4.2616	4.2724	4.2833
2.3881	2.459	2.5306	2.6038	2.6794	2.7579	2.8397	2.9247	3.0125	3.1017	3.1906	3.2775	3.3613	3.441	3.5162	3.5867	3.6523	3.7128	3.7681	3.8181	3.8626	3.9017	3.9357	3.9652	3.9906	4.0126	4.0314	4.0478	4.0621	4.0748	4.0863	4.0969	4.1069	4.1166	4.1261	4.1355	4.1449	4.1544	4.1639	4.1735	4.1833	4.1931	4.203	4.2131	4.2234	4.2338	4.2444	4.2552	4.2662	4.2773
2.3886	2.458	2.5281	2.5998	2.674	2.7511	2.8316	2.9155	3.0023	3.0907	3.1791	3.2657	3.3495	3.4293	3.505	3.576	3.6422	3.7034	3.7593	3.8099	3.8549	3.8944	3.9287	3.9585	3.9841	4.0061	4.025	4.0413	4.0556	4.0683	4.0798	4.0903	4.1003	4.1099	4.1194	4.1288	4.1381	4.1475	4.157	4.1666	4.1763	4.1862	4.1962	4.2063	4.2166	4.2272	4.2379	4.2488	4.26	4.2714
2.389	2.457	2.5257	2.5959	2.6687	2.7445	2.8237	2.9065	2.9922	3.0799	3.1677	3.254	3.3377	3.4178	3.4938	3.5654	3.6322	3.694	3.7506	3.8017	3.8473	3.8871	3.9218	3.9518	3.9775	3.9996	4.0186	4.0349	4.0492	4.0619	4.0733	4.0839	4.0938	4.1034	4.1128	4.122	4.1313	4.1407	4.1501	4.1597	4.1694	4.1793	4.1893	4.1995	4.21	4.2206	4.2314	4.2425	4.2539	4.2655
2.3895	2.456	2.5232	2.5921	2.6634	2.7379	2.8158	2.8975	2.9823	3.0692	3.1564	3.2425	3.3261	3.4064	3.4828	3.5549	3.6223	3.6848	3.7419	3.7936	3.8397	3.88	3.9149	3.9451	3.971	3.9932	4.0122	4.0286	4.0429	4.0555	4.0669	4.0774	4.0873	4.0968	4.1062	4.1154	4.1246	4.1339	4.1433	4.1529	4.1626	4.1725	4.1826	4.1928	4.2033	4.2141	4.225	4.2363	4.2479	4.2597
2.39	2.4551	2.5208	2.5883	2.6582	2.7313	2.8081	2.8886	2.9725	3.0586	3.1453	3.231	3.3146	3.3951	3.4719	3.5445	3.6125	3.6756	3.7334	3.7856	3.8322	3.8728	3.9081	3.9385	3.9645	3.9868	4.0059	4.0223	4.0365	4.0492	4.0606	4.071	4.0809	4.0903	4.0996	4.1088	4.1179	4.1272	4.1366	4.1461	4.1559	4.1658	4.1759	4.1862	4.1968	4.2076	4.2187	4.2301	4.2419	4.254
2.3905	2.4541	2.5185	2.5845	2.6531	2.7249	2.8004	2.8799	2.9627	3.0481	3.1343	3.2198	3.3033	3.384	3.4611	3.5342	3.6029	3.6665	3.7249	3.7777	3.8247	3.8658	3.9013	3.9319	3.9581	3.9805	3.9996	4.016	4.0303	4.0429	4.0543	4.0647	4.0745	4.0839	4.0931	4.1022	4.1113	4.1206	4.1299	4.1395	4.1492	4.1591	4.1692	4.1796	4.1903	4.2012	4.2125	4.2241	4.236	4.2483
2.391	2.4532	2.5162	2.5808	2.648	2.7185	2.7929	2.8712	2.9532	3.0378	3.1235	3.2086	3.2921	3.373	3.4505	3.5241	3.5933	3.6575	3.7165	3.7698	3.8173	3.8588	3.8946	3.9254	3.9517	3.9742	3.9933	4.0098	4.024	4.0367	4.048	4.0584	4.0682	4.0775	4.0867	4.0957	4.1048	4.114	4.1233	4.1328	4.1426	4.1525	4.1627	4.1731	4.1839	4.1949	4.2063	4.218	4.2301	4.2426
2.3915	2.4523	2.5139	2.5772	2.6431	2.7123	2.7854	2.8627	2.9437	3.0276	3.1128	3.1976	3.2811	3.3621	3.44	3.5141	3.5838	3.6486	3.7082	3.7621	3.81	3.8518	3.8879	3.9189	3.9454	3.9679	3.9871	4.0036	4.0178	4.0305	4.0418	4.0522	4.0619	4.0712	4.0803	4.0893	4.0983	4.1075	4.1168	4.1263	4.136	4.146	4.1562	4.1667	4.1776	4.1887	4.2002	4.2121	4.2244	4.2371
2.392	2.4514	2.5117	2.5736	2.6382	2.7062	2.7781	2.8544	2.9345	3.0176	3.1022	3.1868	3.2702	3.3514	3.4296	3.5042	3.5745	3.6399	3.7	3.7544	3.8028	3.8449	3.8813	3.9125	3.9391	3.9617	3.981	3.9974	4.0117	4.0243	4.0357	4.046	4.0557	4.065	4.074	4.083	4.092	4.1011	4.1104	4.1199	4.1296	4.1396	4.1498	4.1604	4.1713	4.1826	4.1942	4.2062	4.2187	4.2316
2.3925	2.4506	2.5095	2.5701	2.6334	2.7001	2.771	2.8461	2.9253	3.0078	3.0919	3.1762	3.2595	3.3409	3.4194	3.4945	3.5653	3.6312	3.6919	3.7468	3.7956	3.8381	3.8748	3.9062	3.9329	3.9556	3.9749	3.9913	4.0056	4.0182	4.0296	4.0399	4.0496	4.0588	4.0678	4.0767	4.0857	4.0947	4.104	4.1135	4.1232	4.1333	4.1436	4.1542	4.1652	4.1765	4.1883	4.2005	4.2131	4.2262
2.393	2.4498	2.5073	2.5666	2.6287	2.6942	2.7639	2.8381	2.9164	2.9981	3.0817	3.1658	3.249	3.3305	3.4094	3.4849	3.5562	3.6227	3.6839	3.7393	3.7885	3.8314	3.8683	3.8999	3.9267	3.9495	3.9688	3.9853	3.9996	4.0122	4.0235	4.0338	4.0435	4.0527	4.0617	4.0705	4.0794	4.0885	4.0977	4.1072	4.117	4.127	4.1374	4.1481	4.1591	4.1706	4.1825	4.1948	4.2076	4.2209
2.3935	2.449	2.5052	2.5633	2.6241	2.6884	2.757	2.8302	2.9076	2.9886	3.0718	3.1555	3.2387	3.3204	3.3996	3.4755	3.5473	3.6143	3.676	3.7319	3.7815	3.8247	3.8619	3.8936	3.9206	3.9435	3.9628	3.9793	3.9936	4.0062	4.0175	4.0279	4.0375	4.0467	4.0556	4.0644	4.0733	4.0823	4.0916	4.1011	4.1108	4.1209	4.1313	4.142	4.1532	4.1647	4.1767	4.1892	4.2022	4.2157
2.394	2.4482	2.5032	2.56	2.6196	2.6828	2.7503	2.8224	2.899	2.9794	3.062	3.1455	3.2286	3.3104	3.3899	3.4662	3.5386	3.6061	3.6682	3.7246	3.7746	3.8181	3.8555	3.8875	3.9146	3.9375	3.9569	3.9734	3.9877	4.0003	4.0116	4.0219	4.0316	4.0407	4.0496	4.0584	4.0673	4.0763	4.0855	4.095	4.1048	4.1149	4.1253	4.1361	4.1473	4.159	4.1711	4.1837	4.1969	4.2105
2.3944	2.4474	2.5012	2.5568	2.6152	2.6772	2.7437	2.8148	2.8906	2.9703	3.0524	3.1356	3.2187	3.3006	3.3804	3.4572	3.53	3.598	3.6606	3.7174	3.7678	3.8116	3.8493	3.8814	3.9086	3.9316	3.951	3.9676	3.9819	3.9945	4.0058	4.0161	4.0257	4.0348	4.0437	4.0525	4.0613	4.0703	4.0795	4.089	4.0988	4.109	4.1194	4.1303	4.1416	4.1534	4.1656	4.1784	4.1917	4.2055
2.3949	2.4467	2.4993	2.5537	2.6109	2.6718	2.7372	2.8075	2.8824	2.9614	3.0431	3.126	3.209	3.2911	3.3712	3.4483	3.5215	3.59	3.6531	3.7103	3.7611	3.8052	3.8431	3.8753	3.9027	3.9257	3.9452	3.9618	3.9761	3.9887	4	4.0103	4.0199	4.0291	4.0379	4.0467	4.0555	4.0644	4.0737	4.0832	4.093	4.1031	4.1137	4.1246	4.136	4.1478	4.1602	4.1731	4.1865	4.2006
2.3954	2.446	2.4974	2.5506	2.6067	2.6666	2.7309	2.8003	2.8744	2.9528	3.034	3.1166	3.1996	3.2817	3.3621	3.4396	3.5133	3.5822	3.6457	3.7034	3.7545	3.7989	3.837	3.8694	3.8968	3.92	3.9395	3.9561	3.9704	3.983	3.9943	4.0047	4.0142	4.0234	4.0322	4.0409	4.0497	4.0587	4.0679	4.0774	4.0873	4.0975	4.108	4.119	4.1305	4.1424	4.1549	4.1679	4.1816	4.1958
2.3959	2.4453	2.4956	2.5477	2.6027	2.6615	2.7248	2.7933	2.8666	2.9443	3.0251	3.1075	3.1904	3.2726	3.3532	3.4311	3.5052	3.5746	3.6385	3.6965	3.748	3.7927	3.831	3.8635	3.891	3.9143	3.9338	3.9504	3.9647	3.9774	3.9887	3.9991	4.0086	4.0178	4.0266	4.0353	4.0441	4.0531	4.0623	4.0718	4.0817	4.0919	4.1025	4.1136	4.1251	4.1372	4.1497	4.1629	4.1767	4.1911
2.3964	2.4447	2.4939	2.5449	2.5988	2.6565	2.7189	2.7865	2.859	2.9361	3.0164	3.0986	3.1814	3.2638	3.3446	3.4228	3.4973	3.5671	3.6315	3.6898	3.7417	3.7866	3.825	3.8577	3.8854	3.9086	3.9282	3.9448	3.9592	3.9718	3.9832	3.9935	4.0031	4.0123	4.0211	4.0298	4.0386	4.0475	4.0568	4.0663	4.0762	4.0865	4.0971	4.1083	4.1199	4.132	4.1447	4.158	4.1719	4.1865
2.3968	2.4441	2.4922	2.5421	2.595	2.6517	2.7132	2.7799	2.8517	2.9282	3.008	3.0899	3.1727	3.2551	3.3362	3.4148	3.4896	3.5598	3.6245	3.6833	3.7354	3.7805	3.8192	3.852	3.8797	3.9031	3.9227	3.9393	3.9537	3.9664	3.9778	3.9881	3.9977	4.0068	4.0157	4.0244	4.0331	4.0421	4.0514	4.0609	4.0709	4.0812	4.0919	4.1031	4.1148	4.127	4.1398	4.1532	4.1673	4.182
2.3973	2.4435	2.4906	2.5395	2.5913	2.6471	2.7076	2.7735	2.8446	2.9205	2.9999	3.0815	3.1642	3.2468	3.3281	3.4069	3.4821	3.5527	3.6178	3.6768	3.7293	3.7746	3.8134	3.8464	3.8742	3.8976	3.9172	3.9339	3.9483	3.961	3.9724	3.9828	3.9924	4.0015	4.0104	4.0191	4.0279	4.0368	4.0461	4.0557	4.0657	4.076	4.0868	4.098	4.1098	4.1221	4.135	4.1485	4.1627	4.1776
2.3978	2.443	2.489	2.537	2.5878	2.6426	2.7023	2.7673	2.8377	2.9131	2.9921	3.0734	3.156	3.2387	3.3202	3.3993	3.4749	3.5457	3.6112	3.6706	3.7232	3.7688	3.8078	3.8409	3.8687	3.8922	3.9119	3.9286	3.943	3.9557	3.9671	3.9775	3.9872	3.9963	4.0052	4.0139	4.0227	4.0317	4.041	4.0506	4.0606	4.071	4.0818	4.0931	4.105	4.1174	4.1304	4.144	4.1584	4.1734
2.3983	2.4425	2.4876	2.5345	2.5845	2.6384	2.6972	2.7614	2.8311	2.9059	2.9845	3.0656	3.1481	3.2308	3.3125	3.3919	3.4678	3.539	3.6048	3.6644	3.7174	3.7631	3.8022	3.8354	3.8634	3.8869	3.9066	3.9233	3.9377	3.9505	3.962	3.9724	3.9821	3.9912	4.0001	4.0088	4.0177	4.0267	4.036	4.0456	4.0557	4.0661	4.077	4.0883	4.1003	4.1128	4.1259	4.1396	4.1541	4.1693
2.3987	2.442	2.4862	2.5322	2.5812	2.6343	2.6922	2.7557	2.8248	2.899	2.9772	3.0581	3.1405	3.2232	3.3051	3.3848	3.4609	3.5324	3.5985	3.6584	3.7116	3.7575	3.7968	3.8301	3.8581	3.8816	3.9014	3.9181	3.9326	3.9454	3.9569	3.9673	3.9771	3.9863	3.9952	4.0039	4.0127	4.0218	4.0311	4.0408	4.0509	4.0614	4.0723	4.0837	4.0957	4.1083	4.1215	4.1354	4.15	4.1653
2.3992	2.4416	2.4849	2.53	2.5782	2.6303	2.6875	2.7503	2.8187	2.8924	2.9702	3.0509	3.1332	3.216	3.298	3.3779	3.4543	3.5261	3.5924	3.6526	3.706	3.7521	3.7915	3.8248	3.8529	3.8765	3.8963	3.913	3.9275	3.9403	3.9519	3.9624	3.9722	3.9814	3.9903	3.9991	4.008	4.0171	4.0264	4.0362	4.0463	4.0568	4.0678	4.0793	4.0913	4.104	4.1173	4.1313	4.146	4.1615
2.3996	2.4412	2.4836	2.5279	2.5753	2.6266	2.683	2.7451	2.8129	2.8861	2.9635	3.0439	3.1261	3.209	3.2911	3.3712	3.4479	3.52	3.5865	3.6469	3.7005	3.7468	3.7862	3.8197	3.8478	3.8714	3.8912	3.908	3.9225	3.9354	3.947	3.9576	3.9674	3.9767	3.9856	3.9944	4.0033	4.0125	4.0219	4.0316	4.0418	4.0524	4.0634	4.075	4.0871	4.0999	4.1133	4.1274	4.1422	4.1578
2.4001	2.4409	2.4825	2.526	2.5725	2.6231	2.6788	2.7402	2.8074	2.8801	2.9572	3.0373	3.1194	3.2023	3.2846	3.3649	3.4418	3.514	3.5808	3.6414	3.6952	3.7415	3.7811	3.8146	3.8428	3.8665	3.8863	3.9031	3.9177	3.9306	3.9422	3.9529	3.9627	3.972	3.981	3.9899	3.9988	4.008	4.0175	4.0273	4.0375	4.0481	4.0592	4.0709	4.0831	4.0959	4.1094	4.1236	4.1386	4.1543
2.4006	2.4406	2.4814	2.5241	2.5699	2.6198	2.6748	2.7356	2.8022	2.8744	2.9511	3.031	3.1131	3.1959	3.2783	3.3588	3.4359	3.5083	3.5753	3.6361	3.69	3.7365	3.7761	3.8097	3.8379	3.8616	3.8815	3.8983	3.9129	3.9259	3.9376	3.9482	3.9582	3.9675	3.9766	3.9855	3.9945	4.0037	4.0132	4.0231	4.0333	4.044	4.0552	4.0669	4.0792	4.0921	4.1057	4.12	4.1351	4.1509
2.401	2.4403	2.4804	2.5224	2.5675	2.6167	2.671	2.7312	2.7973	2.869	2.9454	3.0251	3.107	3.1899	3.2724	3.353	3.4303	3.5029	3.57	3.6309	3.6849	3.7315	3.7712	3.8049	3.8331	3.8568	3.8767	3.8936	3.9082	3.9212	3.933	3.9437	3.9537	3.9632	3.9723	3.9813	3.9903	3.9996	4.0091	4.0191	4.0294	4.0401	4.0514	4.0631	4.0755	4.0885	4.1021	4.1165	4.1317	4.1477
2.4015	2.4401	2.4795	2.5209	2.5653	2.6138	2.6675	2.7271	2.7926	2.864	2.94	3.0195	3.1013	3.1842	3.2667	3.3474	3.4249	3.4976	3.5649	3.6259	3.68	3.7267	3.7665	3.8001	3.8284	3.8522	3.8721	3.889	3.9036	3.9167	3.9285	3.9394	3.9494	3.9589	3.9681	3.9772	3.9863	3.9956	4.0052	4.0152	4.0256	4.0364	4.0477	4.0595	4.072	4.085	4.0988	4.1133	4.1285	4.1446
2.4019	2.4399	2.4787	2.5194	2.5632	2.6111	2.6642	2.7233	2.7883	2.8593	2.935	3.0143	3.0959	3.1788	3.2614	3.3422	3.4198	3.4926	3.56	3.6211	3.6753	3.722	3.7618	3.7955	3.8239	3.8476	3.8676	3.8845	3.8992	3.9123	3.9242	3.9351	3.9453	3.9548	3.9641	3.9732	3.9824	3.9918	4.0015	4.0115	4.022	4.0328	4.0442	4.0561	4.0686	4.0817	4.0956	4.1102	4.1255	4.1417
2.4024	2.4398	2.478	2.5181	2.5613	2.6087	2.6612	2.7198	2.7844	2.8549	2.9303	3.0094	3.0909	3.1738	3.2564	3.3373	3.4149	3.4879	3.5553	3.6165	3.6707	3.7175	3.7573	3.791	3.8194	3.8432	3.8631	3.8801	3.8948	3.908	3.92	3.931	3.9412	3.9509	3.9602	3.9694	3.9787	3.9882	3.9979	4.008	4.0185	4.0295	4.0409	4.0529	4.0654	4.0787	4.0926	4.1072	4.1227	4.1389
2.4028	2.4397	2.4774	2.517	2.5596	2.6064	2.6585	2.7166	2.7807	2.8509	2.926	3.0049	3.0863	3.1691	3.2517	3.3327	3.4104	3.4834	3.5509	3.6121	3.6664	3.7131	3.753	3.7867	3.815	3.8388	3.8588	3.8758	3.8906	3.9038	3.9159	3.927	3.9373	3.9471	3.9565	3.9658	3.9751	3.9847	3.9945	4.0047	4.0153	4.0263	4.0378	4.0498	4.0625	4.0758	4.0897	4.1045	4.12	4.1364
2.4033	2.4397	2.4769	2.516	2.5581	2.6045	2.6561	2.7137	2.7774	2.8473	2.9221	3.0007	3.082	3.1648	3.2474	3.3284	3.4061	3.4791	3.5466	3.6079	3.6621	3.7089	3.7487	3.7824	3.8108	3.8346	3.8546	3.8716	3.8864	3.8998	3.9119	3.9231	3.9335	3.9434	3.953	3.9623	3.9718	3.9814	3.9913	4.0016	4.0122	4.0233	4.0349	4.047	4.0597	4.0731	4.0871	4.1019	4.1175	4.134
2.4037	2.4397	2.4765	2.5151	2.5568	2.6027	2.6539	2.7111	2.7745	2.844	2.9186	2.997	3.0782	3.1608	3.2434	3.3244	3.4021	3.4752	3.5427	3.6039	3.6581	3.7048	3.7446	3.7783	3.8067	3.8305	3.8505	3.8675	3.8824	3.8958	3.9081	3.9194	3.9299	3.9399	3.9496	3.959	3.9686	3.9783	3.9883	3.9986	4.0094	4.0205	4.0322	4.0444	4.0571	4.0706	4.0847	4.0996	4.1152	4.1318
2.4042	2.4398	2.4762	2.5144	2.5557	2.6012	2.652	2.7088	2.7719	2.8411	2.9154	2.9937	3.0747	3.1572	3.2398	3.3207	3.3984	3.4714	3.5389	3.6001	3.6542	3.7009	3.7407	3.7743	3.8027	3.8265	3.8465	3.8636	3.8785	3.892	3.9044	3.9158	3.9264	3.9365	3.9463	3.9559	3.9655	3.9754	3.9855	3.9959	4.0067	4.0179	4.0297	4.0419	4.0548	4.0683	4.0825	4.0974	4.1131	4.1297
2.4046	2.4399	2.4759	2.5139	2.5549	2.6	2.6504	2.7069	2.7697	2.8386	2.9127	2.9907	3.0716	3.1541	3.2366	3.3174	3.3951	3.468	3.5354	3.5964	3.6505	3.6972	3.7369	3.7705	3.7988	3.8226	3.8426	3.8598	3.8748	3.8884	3.9008	3.9123	3.9231	3.9333	3.9432	3.953	3.9627	3.9726	3.9829	3.9934	4.0043	4.0156	4.0274	4.0397	4.0526	4.0662	4.0804	4.0954	4.1112	4.1279
2.405	2.44	2.4758	2.5135	2.5542	2.599	2.6491	2.7053	2.7678	2.8365	2.9103	2.9882	3.0689	3.1513	3.2337	3.3145	3.392	3.4649	3.5321	3.5931	3.647	3.6936	3.7332	3.7668	3.795	3.8188	3.8389	3.8561	3.8711	3.8848	3.8974	3.909	3.9199	3.9303	3.9403	3.9502	3.9601	3.9701	3.9804	3.991	4.002	4.0134	4.0253	4.0377	4.0507	4.0643	4.0786	4.0937	4.1095	4.1262
2.4055	2.4403	2.4758	2.5133	2.5537	2.5983	2.6482	2.7041	2.7663	2.8347	2.9084	2.9861	3.0667	3.1489	3.2312	3.3119	3.3893	3.462	3.5291	3.5899	3.6437	3.6902	3.7297	3.7632	3.7914	3.8152	3.8353	3.8525	3.8676	3.8814	3.8941	3.9058	3.9169	3.9274	3.9376	3.9476	3.9576	3.9678	3.9782	3.9889	4	4.0115	4.0234	4.0359	4.049	4.0627	4.077	4.0921	4.108	4.1248
2.4059	2.4405	2.476	2.5132	2.5535	2.5978	2.6475	2.7032	2.7652	2.8334	2.9069	2.9844	3.0649	3.1469	3.2291	3.3096	3.3869	3.4594	3.5263	3.5869	3.6406	3.6869	3.7264	3.7598	3.7879	3.8117	3.8318	3.849	3.8642	3.8781	3.8909	3.9028	3.914	3.9247	3.935	3.9452	3.9553	3.9656	3.9762	3.987	3.9982	4.0098	4.0218	4.0344	4.0475	4.0612	4.0756	4.0908	4.1067	4.1235
2.4063	2.4409	2.4762	2.5133	2.5534	2.5977	2.6472	2.7027	2.7645	2.8326	2.9058	2.9832	3.0635	3.1454	3.2274	3.3077	3.3848	3.4571	3.5238	3.5842	3.6377	3.6838	3.7232	3.7565	3.7846	3.8083	3.8284	3.8457	3.861	3.8749	3.8879	3.8999	3.9113	3.9222	3.9327	3.943	3.9533	3.9637	3.9744	3.9853	3.9966	4.0083	4.0204	4.033	4.0462	4.06	4.0745	4.0897	4.1056	4.1224
2.4067	2.4412	2.4765	2.5136	2.5536	2.5977	2.6471	2.7026	2.7642	2.8321	2.9052	2.9824	3.0625	3.1443	3.2261	3.3062	3.3831	3.4551	3.5216	3.5817	3.635	3.6809	3.7201	3.7533	3.7814	3.805	3.8251	3.8425	3.8578	3.8719	3.885	3.8972	3.9088	3.9198	3.9304	3.9409	3.9514	3.962	3.9728	3.9839	3.9953	4.007	4.0192	4.0319	4.0452	4.059	4.0735	4.0888	4.1048	4.1216
2.4072	2.4417	2.477	2.514	2.554	2.5981	2.6474	2.7027	2.7643	2.832	2.905	2.982	3.062	3.1435	3.2251	3.305	3.3816	3.4534	3.5196	3.5795	3.6325	3.6782	3.7172	3.7503	3.7783	3.8019	3.822	3.8394	3.8548	3.869	3.8823	3.8946	3.9064	3.9176	3.9284	3.9391	3.9497	3.9605	3.9714	3.9826	3.9941	4.006	4.0183	4.031	4.0443	4.0582	4.0728	4.0881	4.1041	4.1209
2.4076	2.4422	2.4775	2.5146	2.5547	2.5987	2.648	2.7032	2.7647	2.8323	2.9052	2.9821	3.0618	3.1432	3.2245	3.3042	3.3805	3.452	3.5178	3.5774	3.6301	3.6756	3.7145	3.7474	3.7753	3.7989	3.819	3.8364	3.852	3.8663	3.8797	3.8922	3.9041	3.9155	3.9266	3.9374	3.9482	3.9591	3.9702	3.9815	3.9932	4.0051	4.0175	4.0304	4.0437	4.0577	4.0723	4.0876	4.1036	4.1204
2.408	2.4427	2.4782	2.5154	2.5555	2.5995	2.6488	2.7041	2.7655	2.833	2.9057	2.9825	3.0621	3.1432	3.2243	3.3037	3.3797	3.4508	3.5163	3.5755	3.628	3.6732	3.7118	3.7447	3.7725	3.796	3.8161	3.8336	3.8492	3.8637	3.8772	3.8899	3.902	3.9136	3.9248	3.9359	3.9469	3.958	3.9692	3.9807	3.9924	4.0045	4.017	4.0299	4.0433	4.0573	4.0719	4.0873	4.1033	4.1201
2.4084	2.4433	2.4789	2.5163	2.5565	2.6006	2.65	2.7052	2.7666	2.834	2.9067	2.9833	3.0627	3.1436	3.2244	3.3035	3.3792	3.4499	3.515	3.5739	3.626	3.671	3.7094	3.742	3.7697	3.7932	3.8134	3.8309	3.8466	3.8612	3.8748	3.8878	3.9001	3.9119	3.9233	3.9345	3.9457	3.957	3.9684	3.98	3.9919	4.004	4.0166	4.0296	4.0431	4.0571	4.0718	4.0871	4.1032	4.12
2.4088	2.4439	2.4797	2.5173	2.5577	2.6019	2.6514	2.7067	2.768	2.8354	2.908	2.9844	3.0637	3.1443	3.2249	3.3036	3.3789	3.4493	3.5139	3.5724	3.6242	3.6688	3.707	3.7395	3.7671	3.7906	3.8107	3.8283	3.8441	3.8588	3.8726	3.8857	3.8982	3.9102	3.9219	3.9334	3.9447	3.9562	3.9677	3.9795	3.9915	4.0038	4.0164	4.0295	4.0431	4.0572	4.0719	4.0872	4.1032	4.12
2.4092	2.4446	2.4807	2.5185	2.559	2.6035	2.653	2.7084	2.7698	2.8372	2.9096	2.986	3.065	3.1454	3.2257	3.304	3.3789	3.4489	3.5131	3.5711	3.6225	3.6669	3.7048	3.7372	3.7646	3.788	3.8081	3.8258	3.8417	3.8565	3.8705	3.8838	3.8965	3.9088	3.9207	3.9323	3.9439	3.9555	3.9673	3.9792	3.9913	4.0037	4.0165	4.0296	4.0432	4.0574	4.0721	4.0874	4.1035	4.1202
2.4096	2.4453	2.4817	2.5198	2.5606	2.6052	2.6549	2.7104	2.7719	2.8392	2.9116	2.9878	3.0667	3.1468	3.2267	3.3048	3.3792	3.4487	3.5124	3.57	3.621	3.6651	3.7028	3.7349	3.7623	3.7856	3.8057	3.8234	3.8394	3.8543	3.8685	3.882	3.895	3.9074	3.9196	3.9315	3.9433	3.9551	3.967	3.979	3.9913	4.0038	4.0167	4.0299	4.0436	4.0577	4.0725	4.0878	4.1039	4.1206
2.41	2.446	2.4828	2.5212	2.5623	2.6072	2.6571	2.7127	2.7742	2.8416	2.9139	2.99	3.0687	3.1485	3.2281	3.3057	3.3798	3.4487	3.512	3.5691	3.6197	3.6634	3.7008	3.7328	3.76	3.7833	3.8034	3.8211	3.8372	3.8523	3.8667	3.8804	3.8935	3.9062	3.9186	3.9307	3.9427	3.9547	3.9668	3.979	3.9914	4.0041	4.017	4.0303	4.0441	4.0583	4.073	4.0884	4.1044	4.1211
2.4104	2.4468	2.484	2.5227	2.5642	2.6093	2.6595	2.7152	2.7769	2.8443	2.9166	2.9925	3.071	3.1506	3.2298	3.307	3.3805	3.449	3.5117	3.5684	3.6185	3.6618	3.699	3.7307	3.7578	3.781	3.8011	3.8189	3.8351	3.8503	3.8649	3.8788	3.8922	3.9052	3.9178	3.9301	3.9424	3.9546	3.9668	3.9792	3.9918	4.0045	4.0176	4.0309	4.0447	4.059	4.0738	4.0891	4.1051	4.1218
2.4108	2.4477	2.4852	2.5244	2.5662	2.6117	2.6621	2.718	2.7798	2.8473	2.9195	2.9954	3.0736	3.1529	3.2317	3.3085	3.3815	3.4495	3.5117	3.5678	3.6174	3.6604	3.6973	3.7288	3.7557	3.7789	3.799	3.8168	3.8331	3.8485	3.8633	3.8774	3.891	3.9042	3.9171	3.9297	3.9421	3.9546	3.967	3.9795	3.9922	4.0051	4.0182	4.0317	4.0456	4.0598	4.0746	4.09	4.1059	4.1226
2.4111	2.4485	2.4866	2.5262	2.5684	2.6142	2.6649	2.7211	2.783	2.8505	2.9228	2.9985	3.0765	3.1555	3.234	3.3102	3.3828	3.4501	3.5118	3.5674	3.6165	3.6591	3.6957	3.727	3.7538	3.7769	3.7969	3.8148	3.8312	3.8468	3.8617	3.8761	3.8899	3.9034	3.9165	3.9293	3.942	3.9547	3.9673	3.98	3.9928	4.0058	4.0191	4.0326	4.0465	4.0609	4.0757	4.091	4.1069	4.1235
2.4115	2.4494	2.488	2.5281	2.5707	2.6169	2.6679	2.7244	2.7864	2.8541	2.9263	3.0019	3.0797	3.1584	3.2364	3.3122	3.3842	3.451	3.5121	3.5671	3.6158	3.6579	3.6942	3.7253	3.7519	3.7749	3.795	3.8129	3.8294	3.8451	3.8603	3.8749	3.889	3.9027	3.916	3.9291	3.9421	3.9549	3.9677	3.9806	3.9936	4.0067	4.0201	4.0337	4.0477	4.062	4.0768	4.0921	4.108	4.1245
2.4119	2.4503	2.4894	2.53	2.5731	2.6198	2.6711	2.7279	2.7901	2.8578	2.93	3.0056	3.0832	3.1615	3.2391	3.3145	3.3859	3.4521	3.5125	3.567	3.6151	3.6569	3.6928	3.7236	3.7501	3.7731	3.7931	3.8111	3.8277	3.8436	3.8589	3.8737	3.8881	3.902	3.9157	3.929	3.9422	3.9553	3.9683	3.9814	3.9945	4.0077	4.0212	4.0349	4.0489	4.0633	4.0781	4.0934	4.1093	4.1257
2.4123	2.4513	2.491	2.5321	2.5757	2.6228	2.6745	2.7316	2.794	2.8619	2.9341	3.0095	3.0869	3.1649	3.2421	3.3169	3.3877	3.4533	3.5132	3.567	3.6146	3.6559	3.6915	3.7221	3.7485	3.7713	3.7914	3.8094	3.8261	3.8421	3.8577	3.8727	3.8873	3.9015	3.9154	3.9291	3.9425	3.9558	3.969	3.9822	3.9955	4.0089	4.0224	4.0362	4.0503	4.0647	4.0795	4.0948	4.1107	4.127
2.4126	2.4523	2.4926	2.5343	2.5784	2.626	2.6781	2.7355	2.7982	2.8661	2.9384	3.0137	3.0908	3.1685	3.2453	3.3195	3.3898	3.4547	3.5139	3.5672	3.6142	3.6551	3.6903	3.7207	3.7469	3.7696	3.7897	3.8077	3.8246	3.8408	3.8565	3.8718	3.8867	3.9011	3.9153	3.9292	3.9429	3.9564	3.9698	3.9832	3.9967	4.0102	4.0238	4.0377	4.0518	4.0663	4.0811	4.0964	4.1121	4.1284
2.413	2.4533	2.4942	2.5366	2.5812	2.6293	2.6818	2.7396	2.8025	2.8706	2.9429	3.0181	3.095	3.1724	3.2487	3.3224	3.392	3.4563	3.5148	3.5674	3.6139	3.6544	3.6893	3.7194	3.7454	3.768	3.7881	3.8062	3.8231	3.8395	3.8554	3.8709	3.8861	3.9008	3.9153	3.9294	3.9434	3.9571	3.9707	3.9843	3.9979	4.0116	4.0253	4.0393	4.0534	4.0679	4.0827	4.098	4.1137	4.1299
2.4134	2.4543	2.4959	2.5389	2.5842	2.6327	2.6858	2.7438	2.8071	2.8753	2.9476	3.0227	3.0994	3.1764	3.2522	3.3254	3.3944	3.458	3.5159	3.5678	3.6138	3.6537	3.6883	3.7181	3.7439	3.7665	3.7865	3.8047	3.8218	3.8383	3.8544	3.8702	3.8856	3.9006	3.9153	3.9298	3.9439	3.9579	3.9718	3.9855	3.9993	4.0131	4.0269	4.0409	4.0552	4.0697	4.0845	4.0997	4.1154	4.1316
2.4137	2.4554	2.4977	2.5413	2.5872	2.6363	2.6898	2.7483	2.8118	2.8802	2.9525	3.0276	3.104	3.1807	3.256	3.3286	3.397	3.4599	3.5171	3.5684	3.6137	3.6532	3.6874	3.7169	3.7426	3.7651	3.7851	3.8033	3.8205	3.8372	3.8535	3.8695	3.8852	3.9005	3.9155	3.9302	3.9446	3.9589	3.9729	3.9869	4.0008	4.0147	4.0286	4.0427	4.057	4.0715	4.0864	4.1016	4.1172	4.1333
2.414	2.4565	2.4995	2.5438	2.5903	2.64	2.694	2.7529	2.8167	2.8853	2.9577	3.0326	3.1089	3.1851	3.26	3.332	3.3997	3.4619	3.5184	3.569	3.6138	3.6528	3.6865	3.7158	3.7413	3.7637	3.7837	3.802	3.8193	3.8361	3.8527	3.8689	3.8849	3.9004	3.9157	3.9307	3.9454	3.9599	3.9741	3.9883	4.0023	4.0164	4.0304	4.0446	4.059	4.0735	4.0883	4.1035	4.1191	4.135
2.4144	2.4576	2.5013	2.5464	2.5936	2.6439	2.6984	2.7577	2.8218	2.8906	2.963	3.0378	3.1139	3.1897	3.2641	3.3355	3.4026	3.4641	3.5198	3.5697	3.6139	3.6524	3.6858	3.7148	3.7401	3.7624	3.7824	3.8007	3.8181	3.8352	3.8519	3.8684	3.8846	3.9005	3.916	3.9313	3.9463	3.961	3.9755	3.9898	4.004	4.0182	4.0323	4.0466	4.061	4.0756	4.0904	4.1055	4.121	4.1369
2.4147	2.4587	2.5032	2.549	2.5969	2.6478	2.7028	2.7626	2.827	2.896	2.9685	3.0432	3.119	3.1945	3.2684	3.3392	3.4055	3.4663	3.5213	3.5706	3.6141	3.6521	3.6851	3.7139	3.739	3.7612	3.7812	3.7995	3.8171	3.8343	3.8513	3.868	3.8844	3.9006	3.9164	3.932	3.9472	3.9622	3.9769	3.9914	4.0057	4.02	4.0343	4.0487	4.0631	4.0777	4.0925	4.1076	4.1231	4.1389
2.4151	2.4598	2.5051	2.5517	2.6003	2.6518	2.7074	2.7676	2.8324	2.9016	2.9741	3.0488	3.1244	3.1995	3.2728	3.343	3.4087	3.4687	3.5229	3.5715	3.6144	3.6519	3.6846	3.713	3.7379	3.76	3.78	3.7984	3.8161	3.8334	3.8506	3.8676	3.8843	3.9008	3.9169	3.9327	3.9482	3.9634	3.9783	3.993	4.0076	4.022	4.0364	4.0508	4.0653	4.0799	4.0947	4.1098	4.1252	4.1409
2.4154	2.461	2.5071	2.5544	2.6037	2.6559	2.7121	2.7728	2.8379	2.9073	2.9799	3.0545	3.1298	3.2046	3.2774	3.3469	3.4119	3.4712	3.5247	3.5725	3.6148	3.6518	3.684	3.7122	3.7369	3.759	3.7789	3.7974	3.8151	3.8327	3.8501	3.8673	3.8843	3.901	3.9175	3.9336	3.9493	3.9648	3.9799	3.9948	4.0095	4.024	4.0385	4.053	4.0676	4.0822	4.097	4.112	4.1273	4.143
2.4157	2.4621	2.5091	2.5572	2.6072	2.6601	2.7169	2.778	2.8435	2.9131	2.9858	3.0604	3.1354	3.2098	3.282	3.351	3.4152	3.4738	3.5265	3.5736	3.6153	3.6517	3.6836	3.7115	3.736	3.7579	3.7778	3.7964	3.8142	3.832	3.8496	3.8671	3.8843	3.9013	3.9181	3.9344	3.9505	3.9662	3.9815	3.9966	4.0114	4.0261	4.0407	4.0553	4.0699	4.0846	4.0994	4.1143	4.1296	4.1451
2.416	2.4633	2.5111	2.5601	2.6108	2.6644	2.7217	2.7834	2.8493	2.9191	2.9919	3.0663	3.1412	3.2151	3.2868	3.3551	3.4187	3.4764	3.5284	3.5748	3.6158	3.6518	3.6832	3.7108	3.7351	3.7569	3.7768	3.7954	3.8134	3.8313	3.8491	3.8669	3.8844	3.9017	3.9187	3.9354	3.9517	3.9676	3.9832	3.9984	4.0135	4.0283	4.043	4.0577	4.0723	4.087	4.1018	4.1167	4.1319	4.1473
2.4163	2.4645	2.5132	2.5629	2.6145	2.6687	2.7267	2.7889	2.8551	2.9252	2.998	3.0724	3.147	3.2205	3.2917	3.3594	3.4222	3.4792	3.5304	3.576	3.6164	3.6518	3.6829	3.7102	3.7343	3.756	3.7759	3.7946	3.8127	3.8307	3.8488	3.8667	3.8845	3.9021	3.9194	3.9364	3.953	3.9691	3.9849	4.0004	4.0155	4.0305	4.0453	4.0601	4.0747	4.0894	4.1042	4.1191	4.1342	4.1495
2.4167	2.4657	2.5152	2.5658	2.6182	2.6731	2.7317	2.7944	2.8611	2.9314	3.0043	3.0786	3.153	3.2261	3.2967	3.3637	3.4258	3.482	3.5324	3.5774	3.6171	3.652	3.6826	3.7096	3.7336	3.7552	3.775	3.7937	3.8119	3.8302	3.8484	3.8666	3.8847	3.9026	3.9202	3.9374	3.9543	3.9707	3.9867	4.0023	4.0177	4.0328	4.0477	4.0625	4.0772	4.0919	4.1067	4.1216	4.1366	4.1518
2.417	2.4669	2.5173	2.5688	2.6219	2.6776	2.7368	2.8	2.8671	2.9376	3.0106	3.0849	3.159	3.2317	3.3018	3.3681	3.4295	3.4849	3.5346	3.5787	3.6178	3.6522	3.6824	3.7091	3.7329	3.7543	3.7742	3.7929	3.8113	3.8297	3.8481	3.8666	3.885	3.9031	3.921	3.9385	3.9556	3.9723	3.9885	4.0043	4.0198	4.0351	4.0501	4.065	4.0798	4.0945	4.1092	4.1241	4.139	4.1541
2.4172	2.4681	2.5194	2.5717	2.6257	2.6821	2.7419	2.8057	2.8731	2.9439	3.0171	3.0912	3.1651	3.2374	3.3069	3.3726	3.4332	3.4879	3.5367	3.5802	3.6186	3.6524	3.6822	3.7086	3.7322	3.7536	3.7734	3.7922	3.8107	3.8292	3.8479	3.8666	3.8852	3.9037	3.9218	3.9396	3.957	3.9739	3.9903	4.0064	4.022	4.0374	4.0525	4.0675	4.0823	4.0971	4.1118	4.1266	4.1415	4.1565
2.4175	2.4693	2.5215	2.5747	2.6295	2.6866	2.7471	2.8114	2.8793	2.9503	3.0235	3.0976	3.1712	3.2431	3.3121	3.3771	3.437	3.4909	3.5389	3.5816	3.6194	3.6527	3.6821	3.7082	3.7316	3.7529	3.7726	3.7915	3.8101	3.8288	3.8477	3.8666	3.8855	3.9043	3.9227	3.9408	3.9585	3.9756	3.9922	4.0084	4.0243	4.0398	4.055	4.07	4.0849	4.0997	4.1144	4.1291	4.1439	4.1588
2.4178	2.4705	2.5236	2.5777	2.6333	2.6912	2.7523	2.8171	2.8854	2.9568	3.0301	3.1041	3.1775	3.2489	3.3174	3.3817	3.4408	3.4939	3.5412	3.5831	3.6202	3.653	3.682	3.7078	3.731	3.7522	3.7719	3.7909	3.8095	3.8284	3.8475	3.8667	3.8859	3.9049	3.9236	3.942	3.9599	3.9773	3.9941	4.0105	4.0265	4.0421	4.0575	4.0726	4.0875	4.1023	4.117	4.1317	4.1464	4.1612
2.4181	2.4717	2.5258	2.5807	2.6371	2.6957	2.7576	2.8229	2.8916	2.9632	3.0366	3.1106	3.1837	3.2548	3.3227	3.3863	3.4447	3.497	3.5435	3.5847	3.6211	3.6534	3.6819	3.7074	3.7304	3.7515	3.7713	3.7902	3.809	3.8281	3.8474	3.8668	3.8862	3.9055	3.9245	3.9432	3.9614	3.979	3.996	4.0126	4.0288	4.0445	4.06	4.0752	4.0901	4.1049	4.1196	4.1343	4.1489	4.1636
2.4184	2.4729	2.5279	2.5837	2.6409	2.7003	2.7628	2.8288	2.8979	2.9697	3.0432	3.1171	3.19	3.2606	3.328	3.391	3.4486	3.5001	3.5458	3.5863	3.6221	3.6537	3.6819	3.7071	3.7299	3.7509	3.7706	3.7897	3.8086	3.8278	3.8473	3.867	3.8866	3.9062	3.9255	3.9444	3.9629	3.9807	3.998	4.0147	4.031	4.0469	4.0625	4.0777	4.0927	4.1076	4.1222	4.1368	4.1514	4.166
2.4186	2.4741	2.53	2.5867	2.6448	2.7049	2.7681	2.8346	2.9041	2.9762	3.0499	3.1236	3.1963	3.2665	3.3333	3.3956	3.4525	3.5032	3.5481	3.5879	3.623	3.6542	3.6819	3.7068	3.7295	3.7503	3.77	3.7891	3.8081	3.8275	3.8472	3.8671	3.8871	3.9069	3.9265	3.9457	3.9644	3.9824	3.9999	4.0169	4.0333	4.0493	4.065	4.0803	4.0954	4.1102	4.1249	4.1394	4.1539	4.1684
2.4189	2.4753	2.5321	2.5897	2.6486	2.7095	2.7733	2.8404	2.9104	2.9828	3.0565	3.1302	3.2026	3.2724	3.3386	3.4003	3.4564	3.5064	3.5505	3.5895	3.624	3.6546	3.682	3.7066	3.729	3.7498	3.7695	3.7886	3.8077	3.8273	3.8472	3.8673	3.8875	3.9076	3.9274	3.9469	3.9659	3.9842	4.0019	4.019	4.0356	4.0517	4.0675	4.0829	4.098	4.1128	4.1275	4.142	4.1564	4.1708
2.4192	2.4765	2.5342	2.5927	2.6524	2.7141	2.7786	2.8462	2.9166	2.9893	3.0631	3.1367	3.2089	3.2783	3.3439	3.4049	3.4603	3.5095	3.5529	3.5911	3.625	3.6551	3.682	3.7064	3.7286	3.7493	3.7689	3.7881	3.8073	3.827	3.8471	3.8675	3.8879	3.9083	3.9284	3.9482	3.9674	3.9859	4.0038	4.0211	4.0379	4.0541	4.07	4.0854	4.1006	4.1154	4.1301	4.1445	4.1589	4.1732
2.4194	2.4777	2.5363	2.5957	2.6563	2.7187	2.7838	2.852	2.9228	2.9957	3.0696	3.1432	3.2151	3.2841	3.3492	3.4096	3.4642	3.5126	3.5552	3.5927	3.6259	3.6556	3.6821	3.7062	3.7282	3.7488	3.7684	3.7877	3.807	3.8268	3.8471	3.8677	3.8884	3.909	3.9294	3.9494	3.9689	3.9876	4.0057	4.0232	4.0401	4.0565	4.0724	4.088	4.1032	4.118	4.1327	4.1471	4.1614	4.1755
2.4197	2.4789	2.5384	2.5987	2.66	2.7232	2.7891	2.8578	2.929	3.0022	3.0762	3.1497	3.2214	3.29	3.3545	3.4142	3.4681	3.5157	3.5576	3.5944	3.627	3.656	3.6822	3.706	3.7278	3.7483	3.7679	3.7872	3.8066	3.8266	3.8471	3.8679	3.8889	3.9097	3.9304	3.9507	3.9703	3.9893	4.0076	4.0253	4.0423	4.0588	4.0749	4.0905	4.1057	4.1206	4.1352	4.1496	4.1638	4.1779
2.4199	2.48	2.5405	2.6016	2.6638	2.7278	2.7942	2.8635	2.9351	3.0086	3.0827	3.1561	3.2276	3.2957	3.3597	3.4188	3.472	3.5188	3.5599	3.596	3.628	3.6565	3.6823	3.7058	3.7275	3.7479	3.7675	3.7868	3.8063	3.8265	3.8471	3.8682	3.8893	3.9105	3.9314	3.9519	3.9718	3.991	4.0095	4.0273	4.0445	4.0612	4.0773	4.093	4.1082	4.1231	4.1377	4.1521	4.1662	4.1802
2.4201	2.4812	2.5425	2.6045	2.6675	2.7322	2.7994	2.8692	2.9412	3.0149	3.0891	3.1625	3.2337	3.3015	3.3649	3.4233	3.4758	3.5219	3.5622	3.5976	3.629	3.657	3.6824	3.7057	3.7271	3.7474	3.767	3.7864	3.806	3.8263	3.8472	3.8684	3.8898	3.9112	3.9323	3.9531	3.9732	3.9927	4.0113	4.0293	4.0467	4.0634	4.0797	4.0954	4.1107	4.1256	4.1402	4.1545	4.1686	4.1824
2.4204	2.4823	2.5445	2.6074	2.6712	2.7366	2.8044	2.8748	2.9472	3.0212	3.0955	3.1688	3.2398	3.3071	3.37	3.4278	3.4795	3.5249	3.5645	3.5992	3.6299	3.6575	3.6826	3.7055	3.7268	3.747	3.7666	3.786	3.8057	3.8261	3.8472	3.8686	3.8903	3.9119	3.9333	3.9543	3.9747	3.9943	4.0131	4.0313	4.0488	4.0657	4.082	4.0978	4.1132	4.1281	4.1427	4.1569	4.1709	4.1847
2.4206	2.4834	2.5465	2.6102	2.6749	2.741	2.8094	2.8803	2.9532	3.0274	3.1018	3.175	3.2457	3.3127	3.3751	3.4322	3.4833	3.5279	3.5668	3.6008	3.6309	3.658	3.6827	3.7054	3.7265	3.7466	3.7661	3.7856	3.8054	3.826	3.8472	3.8688	3.8907	3.9126	3.9342	3.9554	3.976	3.9959	4.0149	4.0332	4.0509	4.0679	4.0843	4.1001	4.1155	4.1305	4.145	4.1593	4.1732	4.1868
2.4208	2.4845	2.5485	2.613	2.6784	2.7453	2.8144	2.8858	2.9591	3.0335	3.108	3.1811	3.2516	3.3182	3.38	3.4365	3.4869	3.5308	3.569	3.6023	3.6319	3.6585	3.6828	3.7052	3.7262	3.7462	3.7657	3.7852	3.8051	3.8258	3.8472	3.8691	3.8911	3.9132	3.9351	3.9566	3.9774	3.9974	4.0166	4.0351	4.0529	4.07	4.0865	4.1024	4.1179	4.1328	4.1474	4.1616	4.1754	4.189
2.421	2.4855	2.5504	2.6158	2.682	2.7496	2.8192	2.8912	2.9648	3.0395	3.1141	3.1872	3.2574	3.3236	3.3849	3.4407	3.4905	3.5337	3.5711	3.6038	3.6328	3.659	3.6829	3.7051	3.7259	3.7458	3.7653	3.7848	3.8049	3.8257	3.8472	3.8693	3.8915	3.9138	3.936	3.9576	3.9787	3.9989	4.0183	4.0369	4.0548	4.072	4.0886	4.1046	4.1201	4.1351	4.1496	4.1638	4.1776	4.1911
2.4212	2.4866	2.5523	2.6185	2.6854	2.7537	2.824	2.8964	2.9705	3.0454	3.1201	3.193	3.263	3.3288	3.3896	3.4449	3.4939	3.5365	3.5732	3.6053	3.6337	3.6595	3.683	3.7049	3.7256	3.7454	3.7649	3.7845	3.8046	3.8255	3.8472	3.8694	3.8919	3.9145	3.9368	3.9587	3.9799	4.0003	4.0199	4.0387	4.0567	4.074	4.0907	4.1068	4.1223	4.1373	4.1518	4.1659	4.1797	4.1931
2.4214	2.4876	2.5541	2.6211	2.6888	2.7578	2.8287	2.9016	2.976	3.0512	3.1259	3.1988	3.2686	3.334	3.3943	3.4489	3.4973	3.5392	3.5753	3.6067	3.6346	3.6599	3.6831	3.7048	3.7253	3.745	3.7645	3.7841	3.8043	3.8254	3.8472	3.8696	3.8923	3.915	3.9376	3.9597	3.9811	4.0017	4.0215	4.0404	4.0585	4.076	4.0927	4.1089	4.1244	4.1394	4.1539	4.168	4.1817	4.195
2.4216	2.4886	2.5559	2.6237	2.6921	2.7617	2.8332	2.9066	2.9814	3.0568	3.1316	3.2044	3.274	3.339	3.3988	3.4529	3.5006	3.5418	3.5772	3.6081	3.6354	3.6603	3.6832	3.7046	3.725	3.7446	3.7641	3.7837	3.804	3.8252	3.8472	3.8698	3.8926	3.9156	3.9383	3.9606	3.9823	4.003	4.0229	4.042	4.0603	4.0778	4.0946	4.1108	4.1264	4.1414	4.156	4.17	4.1836	4.1969
2.4217	2.4896	2.5577	2.6262	2.6953	2.7656	2.8377	2.9116	2.9867	3.0623	3.1371	3.2099	3.2792	3.3438	3.4032	3.4567	3.5038	3.5443	3.5791	3.6094	3.6362	3.6607	3.6833	3.7045	3.7246	3.7442	3.7637	3.7833	3.8037	3.825	3.8471	3.8699	3.8929	3.916	3.939	3.9615	3.9833	4.0043	4.0243	4.0435	4.0619	4.0795	4.0965	4.1127	4.1283	4.1434	4.1579	4.1719	4.1855	4.1986
2.4219	2.4905	2.5594	2.6286	2.6985	2.7694	2.842	2.9163	2.9918	3.0676	3.1425	3.2152	3.2842	3.3485	3.4074	3.4603	3.5069	3.5468	3.581	3.6106	3.637	3.661	3.6833	3.7043	3.7243	3.7438	3.7632	3.783	3.8034	3.8248	3.8471	3.87	3.8932	3.9165	3.9396	3.9623	3.9843	4.0054	4.0256	4.045	4.0635	4.0812	4.0982	4.1145	4.1302	4.1452	4.1597	4.1737	4.1872	4.2003
2.4221	2.4914	2.561	2.631	2.7015	2.773	2.8462	2.921	2.9968	3.0728	3.1477	3.2203	3.2891	3.3531	3.4115	3.4639	3.5098	3.5491	3.5827	3.6118	3.6376	3.6613	3.6833	3.7041	3.724	3.7434	3.7628	3.7826	3.803	3.8246	3.847	3.87	3.8934	3.9169	3.9402	3.9631	3.9853	4.0065	4.0269	4.0463	4.0649	4.0828	4.0998	4.1162	4.1319	4.147	4.1615	4.1755	4.1889	4.2019
2.4222	2.4923	2.5626	2.6333	2.7044	2.7766	2.8502	2.9255	3.0016	3.0778	3.1528	3.2253	3.2939	3.3575	3.4154	3.4672	3.5126	3.5513	3.5843	3.6129	3.6383	3.6616	3.6833	3.7038	3.7236	3.743	3.7624	3.7821	3.8027	3.8243	3.8469	3.87	3.8936	3.9172	3.9407	3.9638	3.9861	4.0075	4.028	4.0476	4.0663	4.0842	4.1014	4.1178	4.1335	4.1486	4.1631	4.1771	4.1905	4.2035
2.4224	2.4932	2.5642	2.6355	2.7073	2.78	2.8542	2.9298	3.0062	3.0826	3.1577	3.2301	3.2985	3.3617	3.4192	3.4705	3.5153	3.5535	3.5859	3.614	3.6389	3.6618	3.6833	3.7036	3.7232	3.7426	3.7619	3.7817	3.8024	3.8241	3.8467	3.87	3.8937	3.9176	3.9412	3.9644	3.9869	4.0085	4.0291	4.0488	4.0676	4.0856	4.1028	4.1193	4.1351	4.1502	4.1647	4.1786	4.192	4.2049
2.4225	2.494	2.5657	2.6376	2.7101	2.7834	2.858	2.9341	3.0108	3.0873	3.1624	3.2347	3.3029	3.3658	3.4228	3.4736	3.5179	3.5555	3.5874	3.615	3.6394	3.662	3.6832	3.7034	3.7229	3.7421	3.7615	3.7813	3.802	3.8238	3.8466	3.87	3.8939	3.9178	3.9416	3.965	3.9876	4.0093	4.0301	4.0499	4.0688	4.0869	4.1042	4.1207	4.1365	4.1517	4.1662	4.1801	4.1934	4.2062
2.4227	2.4948	2.5671	2.6397	2.7128	2.7866	2.8617	2.9382	3.0152	3.0918	3.167	3.2392	3.3071	3.3697	3.4263	3.4767	3.5204	3.5574	3.5888	3.6159	3.64	3.6622	3.6831	3.7031	3.7225	3.7417	3.761	3.7809	3.8016	3.8235	3.8464	3.87	3.8939	3.918	3.942	3.9655	3.9883	4.0101	4.031	4.0509	4.0699	4.0881	4.1054	4.122	4.1379	4.153	4.1675	4.1814	4.1947	4.2075
2.4228	2.4956	2.5685	2.6418	2.7154	2.7897	2.8653	2.9421	3.0194	3.0962	3.1714	3.2435	3.3112	3.3735	3.4297	3.4795	3.5227	3.5593	3.5901	3.6168	3.6404	3.6623	3.683	3.7028	3.7221	3.7412	3.7605	3.7804	3.8012	3.8232	3.8462	3.8699	3.894	3.9182	3.9423	3.966	3.9889	4.0108	4.0318	4.0518	4.0709	4.0892	4.1066	4.1232	4.1391	4.1543	4.1688	4.1827	4.196	4.2087
2.4229	2.4963	2.5699	2.6437	2.7179	2.7927	2.8688	2.946	3.0235	3.1005	3.1756	3.2477	3.3152	3.3771	3.4329	3.4823	3.525	3.561	3.5914	3.6176	3.6408	3.6624	3.6829	3.7025	3.7217	3.7408	3.7601	3.78	3.8008	3.8229	3.846	3.8697	3.894	3.9183	3.9426	3.9664	3.9894	4.0115	4.0326	4.0527	4.0719	4.0902	4.1077	4.1244	4.1403	4.1555	4.17	4.1839	4.1971	4.2098
2.423	2.497	2.5712	2.6456	2.7203	2.7957	2.8722	2.9497	3.0275	3.1046	3.1798	3.2517	3.319	3.3806	3.436	3.4849	3.5271	3.5627	3.5926	3.6183	3.6412	3.6625	3.6827	3.7022	3.7213	3.7403	3.7596	3.7795	3.8004	3.8226	3.8457	3.8696	3.8939	3.9184	3.9428	3.9667	3.9899	4.0121	4.0332	4.0535	4.0727	4.0911	4.1087	4.1254	4.1414	4.1566	4.1711	4.185	4.1982	4.2108
2.4231	2.4977	2.5725	2.6474	2.7227	2.7985	2.8754	2.9533	3.0313	3.1085	3.1837	3.2555	3.3226	3.3839	3.4389	3.4874	3.5292	3.5642	3.5937	3.619	3.6416	3.6626	3.6826	3.7019	3.7208	3.7398	3.7591	3.7791	3.8	3.8222	3.8454	3.8694	3.8939	3.9185	3.943	3.967	3.9903	4.0126	4.0338	4.0541	4.0735	4.092	4.1096	4.1264	4.1424	4.1576	4.1721	4.186	4.1992	4.2118
2.4232	2.4984	2.5737	2.6492	2.7249	2.8012	2.8785	2.9567	3.035	3.1123	3.1875	3.2592	3.3261	3.3871	3.4417	3.4898	3.5311	3.5657	3.5947	3.6196	3.6418	3.6626	3.6824	3.7015	3.7204	3.7393	3.7586	3.7786	3.7996	3.8218	3.8452	3.8692	3.8938	3.9185	3.9431	3.9672	3.9906	4.013	4.0344	4.0548	4.0742	4.0928	4.1104	4.1272	4.1433	4.1585	4.1731	4.1869	4.2001	4.2127
2.4233	2.499	2.5748	2.6509	2.7271	2.8039	2.8816	2.9601	3.0385	3.116	3.1912	3.2628	3.3295	3.3902	3.4444	3.4921	3.5329	3.5671	3.5957	3.6202	3.6421	3.6626	3.6822	3.7012	3.72	3.7388	3.7581	3.7781	3.7991	3.8215	3.8449	3.869	3.8937	3.9185	3.9432	3.9674	3.9909	4.0134	4.0348	4.0553	4.0748	4.0934	4.1112	4.128	4.1441	4.1594	4.1739	4.1878	4.2009	4.2135
2.4234	2.4996	2.576	2.6525	2.7292	2.8064	2.8845	2.9633	3.042	3.1195	3.1947	3.2662	3.3327	3.3931	3.447	3.4942	3.5347	3.5684	3.5966	3.6207	3.6423	3.6625	3.6819	3.7008	3.7195	3.7383	3.7576	3.7776	3.7987	3.8211	3.8445	3.8688	3.8935	3.9184	3.9432	3.9675	3.9911	4.0137	4.0352	4.0558	4.0754	4.094	4.1118	4.1287	4.1448	4.1601	4.1747	4.1885	4.2017	4.2142
2.4235	2.5002	2.5771	2.6541	2.7312	2.8089	2.8873	2.9664	3.0453	3.1229	3.1981	3.2695	3.3358	3.3959	3.4494	3.4963	3.5363	3.5696	3.5974	3.6212	3.6425	3.6625	3.6817	3.7004	3.7191	3.7378	3.7571	3.7771	3.7982	3.8207	3.8442	3.8685	3.8933	3.9183	3.9432	3.9676	3.9913	4.0139	4.0356	4.0562	4.0758	4.0946	4.1124	4.1294	4.1455	4.1608	4.1754	4.1892	4.2024	4.2149
2.4236	2.5008	2.5781	2.6556	2.7332	2.8112	2.89	2.9694	3.0484	3.1262	3.2014	3.2726	3.3387	3.3985	3.4517	3.4982	3.5378	3.5707	3.5982	3.6216	3.6426	3.6624	3.6814	3.7	3.7186	3.7373	3.7566	3.7766	3.7978	3.8202	3.8438	3.8682	3.8931	3.9182	3.9431	3.9676	3.9914	4.0141	4.0358	4.0565	4.0762	4.095	4.1129	4.1299	4.1461	4.1614	4.176	4.1898	4.203	4.2154
2.4237	2.5013	2.5791	2.657	2.7351	2.8135	2.8926	2.9722	3.0515	3.1293	3.2045	3.2756	3.3415	3.401	3.4539	3.5	3.5392	3.5718	3.5989	3.622	3.6427	3.6622	3.6811	3.6996	3.7181	3.7368	3.756	3.7761	3.7973	3.8198	3.8434	3.8679	3.8928	3.918	3.943	3.9676	3.9914	4.0142	4.036	4.0568	4.0765	4.0954	4.1133	4.1303	4.1465	4.1619	4.1765	4.1904	4.2035	4.2159
2.4237	2.5018	2.5801	2.6584	2.7369	2.8157	2.8951	2.975	3.0544	3.1323	3.2074	3.2785	3.3442	3.4034	3.456	3.5017	3.5405	3.5727	3.5995	3.6223	3.6427	3.6621	3.6808	3.6992	3.7176	3.7363	3.7555	3.7756	3.7968	3.8194	3.843	3.8675	3.8925	3.9177	3.9428	3.9675	3.9914	4.0143	4.0361	4.0569	4.0768	4.0957	4.1136	4.1307	4.147	4.1624	4.177	4.1908	4.204	4.2164
2.4238	2.5023	2.581	2.6598	2.7386	2.8178	2.8975	2.9776	3.0572	3.1352	3.2103	3.2812	3.3467	3.4057	3.4579	3.5033	3.5418	3.5736	3.6	3.6226	3.6427	3.6619	3.6805	3.6988	3.7171	3.7358	3.755	3.7751	3.7963	3.8189	3.8426	3.8672	3.8922	3.9175	3.9426	3.9674	3.9913	4.0143	4.0362	4.057	4.0769	4.0959	4.1139	4.131	4.1473	4.1627	4.1773	4.1912	4.2043	4.2167
2.4239	2.5028	2.5819	2.661	2.7403	2.8198	2.8998	2.9801	3.0599	3.1379	3.213	3.2838	3.3491	3.4078	3.4597	3.5047	3.5429	3.5744	3.6005	3.6228	3.6427	3.6617	3.6801	3.6983	3.7166	3.7352	3.7544	3.7745	3.7958	3.8184	3.8422	3.8668	3.8919	3.9172	3.9424	3.9672	3.9912	4.0142	4.0362	4.0571	4.077	4.096	4.1141	4.1312	4.1475	4.163	4.1776	4.1915	4.2046	4.217
2.4239	2.5032	2.5827	2.6622	2.7418	2.8217	2.902	2.9826	3.0624	3.1405	3.2156	3.2863	3.3514	3.4098	3.4614	3.5061	3.5439	3.5751	3.6009	3.6229	3.6427	3.6614	3.6798	3.6979	3.7161	3.7347	3.7539	3.774	3.7953	3.8179	3.8417	3.8664	3.8915	3.9169	3.9421	3.967	3.991	4.0141	4.0361	4.0571	4.0771	4.0961	4.1142	4.1314	4.1477	4.1632	4.1779	4.1918	4.2049	4.2173
2.4239	2.5037	2.5835	2.6634	2.7434	2.8235	2.9041	2.9849	3.0649	3.143	3.218	3.2886	3.3535	3.4117	3.463	3.5074	3.5449	3.5758	3.6013	3.623	3.6426	3.6612	3.6794	3.6974	3.7156	3.7341	3.7533	3.7735	3.7948	3.8175	3.8413	3.8659	3.8911	3.9165	3.9418	3.9667	3.9908	4.0139	4.0359	4.057	4.077	4.0961	4.1142	4.1315	4.1478	4.1633	4.178	4.1919	4.205	4.2174
2.424	2.5041	2.5843	2.6645	2.7448	2.8252	2.9061	2.9871	3.0672	3.1454	3.2203	3.2908	3.3555	3.4135	3.4645	3.5086	3.5457	3.5763	3.6016	3.6231	3.6424	3.6609	3.679	3.697	3.7151	3.7336	3.7528	3.7729	3.7943	3.8169	3.8408	3.8655	3.8907	3.9161	3.9414	3.9664	3.9905	4.0137	4.0357	4.0568	4.0769	4.096	4.1142	4.1315	4.1479	4.1634	4.1781	4.192	4.2051	4.2175
2.424	2.5044	2.585	2.6656	2.7462	2.8269	2.908	2.9892	3.0694	3.1476	3.2225	3.2929	3.3574	3.4151	3.4659	3.5096	3.5465	3.5768	3.6018	3.6231	3.6423	3.6606	3.6786	3.6965	3.7145	3.733	3.7522	3.7724	3.7937	3.8164	3.8403	3.865	3.8902	3.9157	3.941	3.966	3.9902	4.0134	4.0355	4.0566	4.0767	4.0959	4.1141	4.1314	4.1478	4.1634	4.1781	4.192	4.2052	4.2176
2.424	2.5048	2.5857	2.6666	2.7475	2.8285	2.9098	2.9912	3.0715	3.1497	3.2246	3.2948	3.3592	3.4167	3.4671	3.5106	3.5472	3.5772	3.602	3.6231	3.6421	3.6602	3.6781	3.696	3.714	3.7325	3.7517	3.7718	3.7932	3.8159	3.8398	3.8645	3.8897	3.9152	3.9406	3.9656	3.9898	4.013	4.0352	4.0563	4.0765	4.0957	4.1139	4.1313	4.1477	4.1633	4.1781	4.192	4.2052	4.2175
2.4241	2.5051	2.5863	2.6675	2.7487	2.83	2.9116	2.993	3.0735	3.1517	3.2265	3.2966	3.3608	3.4181	3.4683	3.5115	3.5478	3.5776	3.6021	3.623	3.6418	3.6599	3.6777	3.6955	3.7135	3.7319	3.7511	3.7713	3.7926	3.8153	3.8392	3.864	3.8892	3.9147	3.9401	3.9651	3.9894	4.0126	4.0348	4.056	4.0762	4.0954	4.1137	4.1311	4.1475	4.1632	4.1779	4.1919	4.2051	4.2175
2.4241	2.5054	2.5869	2.6684	2.7499	2.8314	2.9132	2.9948	3.0754	3.1536	3.2284	3.2984	3.3624	3.4194	3.4693	3.5122	3.5483	3.5778	3.6022	3.6229	3.6416	3.6595	3.6772	3.6949	3.7129	3.7314	3.7505	3.7707	3.7921	3.8148	3.8387	3.8634	3.8887	3.9142	3.9396	3.9646	3.9889	4.0121	4.0344	4.0556	4.0758	4.0951	4.1134	4.1308	4.1473	4.1629	4.1777	4.1917	4.2049	4.2173
2.4241	2.5057	2.5875	2.6693	2.751	2.8328	2.9147	2.9965	3.0771	3.1554	3.2301	3.2999	3.3638	3.4206	3.4702	3.5129	3.5487	3.578	3.6022	3.6227	3.6413	3.6591	3.6767	3.6944	3.7123	3.7308	3.75	3.7701	3.7915	3.8142	3.8381	3.8629	3.8881	3.9136	3.9391	3.9641	3.9884	4.0116	4.0339	4.0551	4.0754	4.0947	4.113	4.1304	4.147	4.1626	4.1775	4.1915	4.2047	4.2171
2.4241	2.506	2.588	2.6701	2.752	2.834	2.9162	2.9981	3.0788	3.1571	3.2317	3.3014	3.3651	3.4216	3.4711	3.5135	3.5491	3.5782	3.6021	3.6225	3.6409	3.6587	3.6762	3.6939	3.7118	3.7302	3.7494	3.7695	3.7909	3.8137	3.8375	3.8623	3.8875	3.9131	3.9385	3.9635	3.9878	4.0111	4.0333	4.0546	4.0749	4.0942	4.1126	4.13	4.1466	4.1623	4.1771	4.1912	4.2044	4.2168
2.4241	2.5063	2.5885	2.6708	2.753	2.8352	2.9176	2.9996	3.0804	3.1586	3.2332	3.3028	3.3663	3.4226	3.4718	3.514	3.5494	3.5782	3.602	3.6223	3.6406	3.6582	3.6757	3.6933	3.7112	3.7296	3.7488	3.769	3.7903	3.8131	3.837	3.8617	3.8869	3.9124	3.9379	3.9629	3.9872	4.0105	4.0327	4.054	4.0743	4.0937	4.1121	4.1296	4.1461	4.1619	4.1768	4.1908	4.2041	4.2165
2.4241	2.5065	2.589	2.6715	2.7539	2.8364	2.9189	3.001	3.0818	3.1601	3.2345	3.304	3.3673	3.4235	3.4725	3.5144	3.5495	3.5782	3.6019	3.622	3.6402	3.6578	3.6752	3.6928	3.7106	3.729	3.7482	3.7684	3.7897	3.8125	3.8363	3.8611	3.8863	3.9118	3.9372	3.9622	3.9865	4.0098	4.0321	4.0534	4.0737	4.0931	4.1115	4.129	4.1456	4.1614	4.1763	4.1904	4.2037	4.2161
2.4241	2.5067	2.5894	2.6722	2.7548	2.8374	2.9201	3.0023	3.0832	3.1614	3.2358	3.3052	3.3683	3.4242	3.473	3.5147	3.5497	3.5782	3.6017	3.6216	3.6397	3.6573	3.6747	3.6922	3.71	3.7284	3.7476	3.7678	3.7891	3.8119	3.8357	3.8604	3.8857	3.9111	3.9365	3.9615	3.9858	4.0091	4.0314	4.0527	4.073	4.0924	4.1109	4.1284	4.1451	4.1609	4.1758	4.1899	4.2032	4.2157
2.4241	2.5069	2.5898	2.6728	2.7556	2.8384	2.9212	3.0036	3.0844	3.1627	3.237	3.3062	3.3692	3.4249	3.4734	3.515	3.5497	3.578	3.6014	3.6213	3.6393	3.6567	3.6741	3.6916	3.7095	3.7279	3.747	3.7672	3.7885	3.8113	3.8351	3.8598	3.885	3.9104	3.9358	3.9608	3.985	4.0083	4.0306	4.052	4.0723	4.0917	4.1102	4.1278	4.1444	4.1603	4.1752	4.1894	4.2027	4.2152
2.4241	2.5071	2.5902	2.6733	2.7564	2.8393	2.9222	3.0047	3.0856	3.1638	3.238	3.3071	3.3699	3.4255	3.4738	3.5151	3.5497	3.5779	3.6011	3.6209	3.6388	3.6562	3.6736	3.691	3.7089	3.7273	3.7464	3.7666	3.7879	3.8106	3.8345	3.8591	3.8843	3.9097	3.935	3.96	3.9842	4.0075	4.0298	4.0512	4.0715	4.0909	4.1094	4.127	4.1438	4.1596	4.1746	4.1888	4.2021	4.2147
2.4241	2.5072	2.5905	2.6738	2.757	2.8401	2.9232	3.0057	3.0867	3.1648	3.239	3.3079	3.3706	3.4259	3.4741	3.5152	3.5495	3.5776	3.6007	3.6204	3.6383	3.6557	3.673	3.6904	3.7083	3.7267	3.7458	3.766	3.7873	3.81	3.8338	3.8584	3.8836	3.9089	3.9342	3.9592	3.9834	4.0067	4.029	4.0503	4.0707	4.0901	4.1086	4.1263	4.143	4.1589	4.1739	4.1881	4.2015	4.2141
2.424	2.5074	2.5908	2.6743	2.7577	2.8409	2.9241	3.0067	3.0877	3.1658	3.2398	3.3087	3.3711	3.4263	3.4742	3.5152	3.5494	3.5773	3.6003	3.6199	3.6377	3.6551	3.6724	3.6898	3.7077	3.726	3.7452	3.7654	3.7867	3.8094	3.8331	3.8577	3.8828	3.9082	3.9334	3.9583	3.9825	4.0058	4.0281	4.0494	4.0698	4.0893	4.1078	4.1254	4.1422	4.1581	4.1732	4.1874	4.2008	4.2134
2.424	2.5075	2.5911	2.6747	2.7582	2.8416	2.9249	3.0076	3.0886	3.1666	3.2406	3.3093	3.3716	3.4266	3.4743	3.5151	3.5491	3.5769	3.5998	3.6194	3.6372	3.6545	3.6718	3.6892	3.7071	3.7254	3.7446	3.7648	3.7861	3.8087	3.8324	3.857	3.8821	3.9074	3.9326	3.9574	3.9816	4.0049	4.0272	4.0485	4.0689	4.0883	4.1069	4.1245	4.1413	4.1573	4.1724	4.1866	4.2001	4.2127
2.424	2.5076	2.5914	2.6751	2.7588	2.8423	2.9256	3.0084	3.0894	3.1674	3.2412	3.3098	3.3719	3.4267	3.4743	3.5149	3.5488	3.5765	3.5993	3.6188	3.6366	3.6539	3.6712	3.6886	3.7064	3.7248	3.744	3.7641	3.7855	3.8081	3.8318	3.8562	3.8813	3.9065	3.9317	3.9565	3.9807	4.0039	4.0262	4.0475	4.0679	4.0873	4.1059	4.1236	4.1404	4.1564	4.1715	4.1858	4.1993	4.212
2.4239	2.5077	2.5916	2.6755	2.7592	2.8429	2.9263	3.0091	3.0901	3.168	3.2418	3.3102	3.3722	3.4268	3.4742	3.5146	3.5484	3.576	3.5988	3.6183	3.636	3.6533	3.6705	3.688	3.7058	3.7242	3.7434	3.7635	3.7848	3.8074	3.831	3.8555	3.8805	3.9057	3.9308	3.9556	3.9797	4.0029	4.0251	4.0464	4.0668	4.0863	4.1049	4.1226	4.1395	4.1554	4.1706	4.1849	4.1985	4.2112
2.4239	2.5078	2.5918	2.6758	2.7596	2.8434	2.9269	3.0097	3.0907	3.1686	3.2423	3.3105	3.3724	3.4268	3.474	3.5143	3.548	3.5755	3.5982	3.6176	3.6353	3.6526	3.6699	3.6874	3.7052	3.7236	3.7428	3.7629	3.7842	3.8067	3.8303	3.8547	3.8796	3.9048	3.9299	3.9546	3.9787	4.0018	4.0241	4.0454	4.0657	4.0852	4.1038	4.1216	4.1384	4.1545	4.1696	4.184	4.1976	4.2104
2.4238	2.5078	2.5919	2.676	2.76	2.8438	2.9274	3.0103	3.0912	3.1691	3.2426	3.3108	3.3724	3.4267	3.4738	3.5139	3.5474	3.5749	3.5975	3.617	3.6347	3.652	3.6692	3.6867	3.7046	3.723	3.7422	3.7623	3.7835	3.806	3.8296	3.854	3.8788	3.9039	3.9289	3.9536	3.9776	4.0007	4.0229	4.0442	4.0646	4.0841	4.1027	4.1205	4.1374	4.1534	4.1686	4.1831	4.1967	4.2095
2.4238	2.5079	2.592	2.6762	2.7603	2.8442	2.9279	3.0108	3.0917	3.1695	3.2429	3.3109	3.3724	3.4266	3.4735	3.5135	3.5469	3.5742	3.5969	3.6163	3.634	3.6513	3.6686	3.6861	3.7039	3.7224	3.7415	3.7616	3.7829	3.8054	3.8289	3.8532	3.8779	3.903	3.9279	3.9525	3.9765	3.9996	4.0218	4.0431	4.0634	4.0829	4.1016	4.1193	4.1362	4.1523	4.1676	4.182	4.1957	4.2086
2.4237	2.5079	2.5921	2.6764	2.7606	2.8446	2.9283	3.0112	3.0921	3.1698	3.2431	3.311	3.3723	3.4263	3.4731	3.5129	3.5462	3.5735	3.5961	3.6155	3.6333	3.6506	3.6679	3.6854	3.7033	3.7217	3.7409	3.761	3.7822	3.8047	3.8281	3.8524	3.8771	3.902	3.9269	3.9515	3.9754	3.9984	4.0206	4.0418	4.0622	4.0817	4.1003	4.1181	4.1351	4.1512	4.1665	4.181	4.1947	4.2076
2.4237	2.5079	2.5922	2.6766	2.7608	2.8449	2.9286	3.0115	3.0924	3.17	3.2432	3.3109	3.3721	3.426	3.4726	3.5123	3.5455	3.5728	3.5954	3.6148	3.6325	3.6499	3.6672	3.6848	3.7027	3.7211	3.7403	3.7604	3.7816	3.804	3.8274	3.8515	3.8762	3.9011	3.9259	3.9504	3.9742	3.9972	4.0193	4.0406	4.0609	4.0804	4.0991	4.1169	4.1339	4.15	4.1653	4.1799	4.1936	4.2066
2.4236	2.5079	2.5923	2.6767	2.761	2.8451	2.9289	3.0118	3.0926	3.1701	3.2432	3.3108	3.3719	3.4256	3.472	3.5116	3.5448	3.572	3.5946	3.614	3.6318	3.6492	3.6665	3.6841	3.702	3.7205	3.7397	3.7597	3.7809	3.8033	3.8266	3.8507	3.8753	3.9001	3.9248	3.9492	3.973	3.996	4.0181	4.0393	4.0596	4.0791	4.0978	4.1156	4.1326	4.1488	4.1641	4.1787	4.1925	4.2055
2.4235	2.5079	2.5923	2.6767	2.7611	2.8453	2.9291	3.012	3.0927	3.1702	3.2432	3.3106	3.3715	3.4251	3.4714	3.5109	3.544	3.5711	3.5937	3.6132	3.631	3.6484	3.6658	3.6834	3.7014	3.7199	3.739	3.7591	3.7802	3.8025	3.8258	3.8499	3.8744	3.8991	3.9237	3.9481	3.9718	3.9947	4.0168	4.0379	4.0583	4.0778	4.0964	4.1143	4.1313	4.1475	4.1629	4.1775	4.1914	4.2044
2.4235	2.5078	2.5923	2.6768	2.7612	2.8454	2.9292	3.0121	3.0928	3.1702	3.243	3.3103	3.3711	3.4245	3.4707	3.5101	3.5431	3.5702	3.5928	3.6123	3.6302	3.6477	3.6651	3.6828	3.7007	3.7192	3.7384	3.7585	3.7796	3.8018	3.8251	3.849	3.8734	3.898	3.9226	3.9469	3.9706	3.9934	4.0154	4.0366	4.0569	4.0764	4.095	4.1129	4.1299	4.1462	4.1616	4.1763	4.1902	4.2033
2.4234	2.5078	2.5923	2.6768	2.7612	2.8454	2.9293	3.0121	3.0928	3.1701	3.2428	3.31	3.3706	3.4238	3.4699	3.5092	3.5422	3.5693	3.5919	3.6115	3.6294	3.6469	3.6644	3.6821	3.7001	3.7186	3.7378	3.7578	3.7789	3.8011	3.8243	3.8481	3.8725	3.897	3.9215	3.9457	3.9693	3.9921	4.014	4.0352	4.0555	4.0749	4.0936	4.1115	4.1285	4.1448	4.1603	4.175	4.1889	4.2021
2.4233	2.5077	2.5922	2.6768	2.7612	2.8455	2.9293	3.0121	3.0927	3.1699	3.2425	3.3096	3.37	3.4231	3.4691	3.5083	3.5412	3.5683	3.591	3.6106	3.6285	3.6461	3.6637	3.6814	3.6994	3.718	3.7371	3.7572	3.7782	3.8004	3.8235	3.8473	3.8715	3.8959	3.9203	3.9444	3.968	3.9907	4.0126	4.0337	4.054	4.0735	4.0921	4.11	4.1271	4.1434	4.1589	4.1737	4.1877	4.2009
2.4232	2.5076	2.5921	2.6767	2.7612	2.8454	2.9293	3.012	3.0926	3.1697	3.2422	3.309	3.3694	3.4223	3.4682	3.5073	3.5402	3.5673	3.59	3.6096	3.6277	3.6453	3.6629	3.6807	3.6988	3.7173	3.7365	3.7565	3.7775	3.7996	3.8227	3.8464	3.8705	3.8949	3.9192	3.9432	3.9666	3.9893	4.0112	4.0322	4.0525	4.0719	4.0906	4.1085	4.1256	4.142	4.1575	4.1723	4.1864	4.1997
2.4232	2.5075	2.5921	2.6766	2.7611	2.8453	2.9292	3.0119	3.0924	3.1694	3.2417	3.3085	3.3686	3.4215	3.4672	3.5063	3.5391	3.5662	3.589	3.6087	3.6268	3.6445	3.6622	3.68	3.6981	3.7167	3.7359	3.7559	3.7769	3.7989	3.8218	3.8455	3.8695	3.8938	3.918	3.9419	3.9653	3.9879	4.0097	4.0307	4.0509	4.0704	4.0891	4.107	4.1241	4.1405	4.1561	4.1709	4.185	4.1984
2.4231	2.5074	2.5919	2.6765	2.761	2.8452	2.929	3.0117	3.0921	3.169	3.2412	3.3078	3.3678	3.4206	3.4662	3.5052	3.538	3.5651	3.5879	3.6077	3.6259	3.6437	3.6614	3.6793	3.6974	3.716	3.7352	3.7552	3.7762	3.7982	3.821	3.8446	3.8685	3.8927	3.9168	3.9406	3.9639	3.9864	4.0082	4.0292	4.0494	4.0688	4.0875	4.1054	4.1226	4.139	4.1546	4.1695	4.1837	4.1971
2.423	2.5073	2.5918	2.6763	2.7608	2.845	2.9288	3.0115	3.0918	3.1685	3.2406	3.3071	3.367	3.4196	3.4651	3.504	3.5368	3.564	3.5868	3.6067	3.625	3.6429	3.6607	3.6786	3.6968	3.7154	3.7346	3.7546	3.7755	3.7974	3.8202	3.8436	3.8675	3.8915	3.9155	3.9393	3.9625	3.9849	4.0066	4.0276	4.0478	4.0672	4.0859	4.1038	4.121	4.1374	4.1531	4.168	4.1823	4.1957
2.4229	2.5072	2.5916	2.6761	2.7606	2.8448	2.9286	3.0112	3.0914	3.168	3.24	3.3063	3.366	3.4185	3.464	3.5028	3.5356	3.5628	3.5857	3.6057	3.6241	3.642	3.6599	3.6779	3.6961	3.7148	3.734	3.7539	3.7748	3.7967	3.8194	3.8427	3.8665	3.8904	3.9143	3.9379	3.961	3.9834	4.0051	4.026	4.0461	4.0655	4.0842	4.1022	4.1194	4.1358	4.1516	4.1666	4.1808	4.1944
2.4228	2.5071	2.5915	2.6759	2.7604	2.8446	2.9283	3.0108	3.0909	3.1674	3.2393	3.3054	3.3651	3.4174	3.4628	3.5016	3.5343	3.5616	3.5846	3.6047	3.6231	3.6412	3.6591	3.6772	3.6955	3.7141	3.7333	3.7533	3.7741	3.7959	3.8185	3.8418	3.8654	3.8892	3.913	3.9365	3.9596	3.9819	4.0035	4.0243	4.0445	4.0639	4.0825	4.1005	4.1177	4.1342	4.15	4.165	4.1794	4.193
2.4227	2.5069	2.5913	2.6757	2.7601	2.8443	2.9279	3.0104	3.0904	3.1668	3.2385	3.3045	3.364	3.4163	3.4615	3.5003	3.533	3.5603	3.5834	3.6036	3.6222	3.6403	3.6584	3.6765	3.6948	3.7135	3.7327	3.7526	3.7734	3.7951	3.8177	3.8408	3.8644	3.8881	3.9117	3.9352	3.9581	3.9803	4.0018	4.0227	4.0428	4.0621	4.0808	4.0988	4.116	4.1325	4.1484	4.1635	4.1778	4.1915
2.4226	2.5067	2.591	2.6754	2.7598	2.8439	2.9275	3.0099	3.0898	3.1661	3.2376	3.3035	3.3629	3.415	3.4602	3.4989	3.5317	3.559	3.5822	3.6025	3.6212	3.6395	3.6576	3.6757	3.6941	3.7128	3.7321	3.752	3.7727	3.7944	3.8168	3.8399	3.8633	3.8869	3.9105	3.9338	3.9566	3.9787	4.0002	4.021	4.041	4.0604	4.0791	4.097	4.1143	4.1309	4.1467	4.1619	4.1763	4.1901
2.4225	2.5066	2.5908	2.6751	2.7594	2.8435	2.9271	3.0094	3.0892	3.1653	3.2367	3.3025	3.3617	3.4138	3.4589	3.4975	3.5303	3.5577	3.581	3.6014	3.6202	3.6386	3.6568	3.675	3.6934	3.7122	3.7314	3.7513	3.772	3.7936	3.816	3.8389	3.8622	3.8857	3.9091	3.9323	3.9551	3.9771	3.9985	4.0192	4.0393	4.0586	4.0773	4.0953	4.1125	4.1291	4.145	4.1602	4.1748	4.1886
2.4224	2.5064	2.5906	2.6748	2.7591	2.8431	2.9266	3.0088	3.0885	3.1645	3.2358	3.3014	3.3605	3.4124	3.4575	3.4961	3.5289	3.5564	3.5798	3.6003	3.6192	3.6377	3.656	3.6743	3.6928	3.7115	3.7308	3.7507	3.7713	3.7928	3.8151	3.8379	3.8611	3.8845	3.9078	3.9309	3.9535	3.9755	3.9968	4.0175	4.0375	4.0568	4.0755	4.0935	4.1108	4.1274	4.1433	4.1586	4.1732	4.1871
2.4223	2.5062	2.5903	2.6745	2.7587	2.8426	2.926	3.0082	3.0878	3.1637	3.2348	3.3002	3.3592	3.411	3.456	3.4946	3.5274	3.555	3.5785	3.5991	3.6182	3.6368	3.6552	3.6736	3.6921	3.7109	3.7302	3.75	3.7706	3.7921	3.8143	3.837	3.86	3.8833	3.9065	3.9294	3.952	3.9739	3.9951	4.0157	4.0357	4.055	4.0737	4.0916	4.109	4.1256	4.1416	4.1569	4.1716	4.1855
2.4221	2.506	2.59	2.6741	2.7582	2.8421	2.9255	3.0075	3.087	3.1628	3.2337	3.299	3.3579	3.4096	3.4545	3.4931	3.5259	3.5536	3.5772	3.598	3.6172	3.6359	3.6544	3.6729	3.6914	3.7103	3.7295	3.7494	3.7699	3.7913	3.8134	3.836	3.8589	3.8821	3.9051	3.928	3.9504	3.9722	3.9934	4.0139	4.0339	4.0532	4.0718	4.0898	4.1071	4.1238	4.1399	4.1552	4.1699	4.184
2.422	2.5058	2.5897	2.6737	2.7578	2.8416	2.9249	3.0068	3.0862	3.1618	3.2326	3.2978	3.3565	3.4081	3.453	3.4916	3.5244	3.5521	3.5759	3.5968	3.6162	3.635	3.6536	3.6721	3.6908	3.7096	3.7289	3.7487	3.7692	3.7905	3.8125	3.835	3.8578	3.8808	3.9038	3.9265	3.9488	3.9705	3.9916	4.0121	4.032	4.0513	4.0699	4.0879	4.1053	4.122	4.1381	4.1535	4.1683	4.1824
2.4219	2.5056	2.5894	2.6733	2.7573	2.841	2.9242	3.0061	3.0853	3.1608	3.2314	3.2965	3.3551	3.4066	3.4514	3.49	3.5229	3.5507	3.5745	3.5956	3.6151	3.6341	3.6528	3.6714	3.6901	3.709	3.7283	3.748	3.7685	3.7898	3.8116	3.834	3.8567	3.8796	3.9024	3.925	3.9472	3.9688	3.9899	4.0103	4.0301	4.0494	4.068	4.086	4.1034	4.1201	4.1363	4.1517	4.1666	4.1808
2.4218	2.5053	2.589	2.6729	2.7568	2.8404	2.9235	3.0053	3.0844	3.1597	3.2302	3.2951	3.3536	3.405	3.4498	3.4883	3.5213	3.5492	3.5732	3.5944	3.6141	3.6331	3.652	3.6707	3.6894	3.7083	3.7276	3.7474	3.7678	3.789	3.8108	3.833	3.8556	3.8783	3.901	3.9235	3.9456	3.9671	3.9881	4.0085	4.0283	4.0475	4.0661	4.0841	4.1015	4.1183	4.1344	4.15	4.1649	4.1791
2.4217	2.5051	2.5887	2.6724	2.7562	2.8398	2.9228	3.0044	3.0835	3.1586	3.229	3.2937	3.3521	3.4034	3.4481	3.4867	3.5197	3.5477	3.5718	3.5932	3.613	3.6322	3.6511	3.6699	3.6887	3.7077	3.727	3.7467	3.7671	3.7882	3.8099	3.832	3.8545	3.8771	3.8996	3.922	3.9439	3.9654	3.9863	4.0066	4.0263	4.0455	4.0641	4.0822	4.0996	4.1164	4.1326	4.1482	4.1632	4.1775
2.4215	2.5048	2.5883	2.672	2.7557	2.8392	2.922	3.0036	3.0824	3.1575	3.2277	3.2923	3.3505	3.4018	3.4464	3.485	3.518	3.5461	3.5704	3.592	3.6119	3.6313	3.6503	3.6692	3.6881	3.7071	3.7264	3.7461	3.7664	3.7874	3.809	3.831	3.8533	3.8758	3.8982	3.9204	3.9423	3.9636	3.9844	4.0047	4.0244	4.0436	4.0622	4.0802	4.0976	4.1145	4.1307	4.1464	4.1614	4.1758
2.4214	2.5046	2.588	2.6715	2.7551	2.8385	2.9213	3.0027	3.0814	3.1563	3.2263	3.2908	3.3489	3.4001	3.4447	3.4832	3.5163	3.5446	3.569	3.5907	3.6109	3.6303	3.6495	3.6685	3.6874	3.7064	3.7257	3.7454	3.7657	3.7866	3.8081	3.83	3.8522	3.8745	3.8968	3.9189	3.9406	3.9619	3.9826	4.0028	4.0225	4.0416	4.0602	4.0782	4.0957	4.1125	4.1288	4.1445	4.1597	4.1741
2.4213	2.5043	2.5876	2.671	2.7545	2.8378	2.9204	3.0017	3.0803	3.155	3.2249	3.2893	3.3472	3.3983	3.4429	3.4815	3.5146	3.543	3.5676	3.5895	3.6098	3.6294	3.6487	3.6677	3.6867	3.7058	3.7251	3.7448	3.765	3.7858	3.8072	3.829	3.8511	3.8732	3.8954	3.9173	3.9389	3.9601	3.9807	4.0009	4.0205	4.0396	4.0582	4.0762	4.0937	4.1106	4.1269	4.1427	4.1579	4.1724
2.4211	2.5041	2.5872	2.6704	2.7538	2.837	2.9196	3.0007	3.0792	3.1538	3.2235	3.2877	3.3456	3.3966	3.4411	3.4797	3.5129	3.5414	3.5662	3.5882	3.6087	3.6285	3.6478	3.667	3.686	3.7051	3.7245	3.7441	3.7643	3.7851	3.8063	3.828	3.8499	3.8719	3.8939	3.9158	3.9373	3.9583	3.9789	3.999	4.0185	4.0376	4.0562	4.0742	4.0917	4.1086	4.125	4.1408	4.1561	4.1707
2.421	2.5038	2.5868	2.6699	2.7532	2.8363	2.9187	2.9997	3.0781	3.1525	3.2221	3.2861	3.3438	3.3948	3.4393	3.4779	3.5112	3.5398	3.5647	3.5869	3.6076	3.6275	3.647	3.6662	3.6854	3.7045	3.7238	3.7435	3.7636	3.7843	3.8055	3.827	3.8488	3.8707	3.8925	3.9142	3.9356	3.9565	3.977	3.997	4.0166	4.0356	4.0541	4.0722	4.0897	4.1066	4.1231	4.139	4.1543	4.169
2.4209	2.5035	2.5863	2.6693	2.7525	2.8355	2.9178	2.9987	3.0769	3.1511	3.2206	3.2845	3.3421	3.393	3.4374	3.4761	3.5094	3.5382	3.5632	3.5857	3.6065	3.6265	3.6462	3.6655	3.6847	3.7039	3.7232	3.7428	3.7629	3.7835	3.8046	3.826	3.8476	3.8694	3.8911	3.9126	3.9339	3.9547	3.9751	3.9951	4.0146	4.0336	4.0521	4.0701	4.0877	4.1047	4.1211	4.1371	4.1524	4.1673
2.4207	2.5032	2.5859	2.6688	2.7518	2.8347	2.9169	2.9976	3.0757	3.1498	3.219	3.2828	3.3403	3.3911	3.4356	3.4742	3.5077	3.5365	3.5618	3.5844	3.6054	3.6256	3.6453	3.6648	3.684	3.7033	3.7226	3.7422	3.7622	3.7827	3.8037	3.825	3.8465	3.8681	3.8896	3.911	3.9322	3.9529	3.9732	3.9931	4.0125	4.0315	4.05	4.0681	4.0856	4.1026	4.1192	4.1352	4.1506	4.1655
2.4206	2.5029	2.5855	2.6682	2.7511	2.8338	2.9159	2.9966	3.0744	3.1484	3.2175	3.2811	3.3385	3.3892	3.4337	3.4723	3.5059	3.5349	3.5603	3.5831	3.6042	3.6246	3.6445	3.664	3.6834	3.7026	3.722	3.7415	3.7615	3.7819	3.8028	3.824	3.8453	3.8668	3.8882	3.9095	3.9305	3.9511	3.9713	3.9911	4.0105	4.0295	4.048	4.066	4.0836	4.1006	4.1172	4.1332	4.1488	4.1638
2.4204	2.5026	2.585	2.6676	2.7504	2.833	2.9149	2.9954	3.0732	3.1469	3.2159	3.2794	3.3367	3.3873	3.4317	3.4704	3.504	3.5332	3.5588	3.5818	3.6031	3.6237	3.6437	3.6633	3.6827	3.702	3.7213	3.7409	3.7608	3.7812	3.8019	3.8229	3.8442	3.8655	3.8867	3.9079	3.9287	3.9493	3.9694	3.9892	4.0085	4.0274	4.0459	4.0639	4.0815	4.0986	4.1152	4.1313	4.1469	4.162
2.4203	2.5023	2.5845	2.667	2.7496	2.8321	2.914	2.9943	3.0719	3.1455	3.2143	3.2776	3.3348	3.3854	3.4298	3.4685	3.5022	3.5315	3.5573	3.5805	3.602	3.6227	3.6428	3.6626	3.682	3.7014	3.7207	3.7403	3.7601	3.7804	3.801	3.8219	3.843	3.8642	3.8853	3.9063	3.927	3.9474	3.9675	3.9872	4.0065	4.0253	4.0438	4.0618	4.0794	4.0966	4.1132	4.1294	4.1451	4.1602
2.4202	2.502	2.5841	2.6664	2.7489	2.8312	2.9129	2.9931	3.0706	3.144	3.2127	3.2759	3.3329	3.3835	3.4278	3.4666	3.5004	3.5298	3.5558	3.5792	3.6009	3.6217	3.642	3.6618	3.6814	3.7007	3.7201	3.7396	3.7594	3.7796	3.8001	3.8209	3.8418	3.8628	3.8838	3.9047	3.9253	3.9456	3.9656	3.9852	4.0044	4.0233	4.0417	4.0598	4.0774	4.0945	4.1112	4.1274	4.1432	4.1584
2.42	2.5017	2.5836	2.6657	2.7481	2.8303	2.9119	2.992	3.0692	3.1425	3.211	3.2741	3.331	3.3815	3.4258	3.4647	3.4985	3.5281	3.5543	3.5778	3.5998	3.6208	3.6412	3.6611	3.6807	3.7001	3.7195	3.739	3.7587	3.7788	3.7992	3.8199	3.8407	3.8615	3.8824	3.9031	3.9236	3.9438	3.9637	3.9832	4.0024	4.0212	4.0396	4.0577	4.0753	4.0925	4.1092	4.1255	4.1413	4.1566
2.4199	2.5014	2.5831	2.6651	2.7473	2.8294	2.9108	2.9908	3.0679	3.141	3.2093	3.2722	3.3291	3.3795	3.4238	3.4627	3.4967	3.5264	3.5527	3.5765	3.5986	3.6198	3.6404	3.6604	3.6801	3.6995	3.7189	3.7384	3.758	3.778	3.7984	3.8189	3.8395	3.8602	3.8809	3.9015	3.9218	3.9419	3.9617	3.9812	4.0003	4.0191	4.0375	4.0556	4.0732	4.0904	4.1072	4.1235	4.1394	4.1548
2.4197	2.5011	2.5826	2.6645	2.7465	2.8285	2.9098	2.9895	3.0665	3.1394	3.2076	3.2704	3.3272	3.3775	3.4218	3.4607	3.4948	3.5247	3.5512	3.5752	3.5975	3.6189	3.6395	3.6597	3.6794	3.6989	3.7183	3.7377	3.7574	3.7773	3.7975	3.8179	3.8384	3.8589	3.8795	3.8999	3.9201	3.9401	3.9598	3.9792	3.9983	4.017	4.0354	4.0534	4.0711	4.0883	4.1052	4.1216	4.1375	4.153
2.4196	2.5007	2.5821	2.6638	2.7457	2.8276	2.9087	2.9883	3.0651	3.1379	3.2059	3.2685	3.3252	3.3755	3.4198	3.4588	3.4929	3.523	3.5497	3.5739	3.5964	3.6179	3.6387	3.6589	3.6788	3.6983	3.7177	3.7371	3.7567	3.7765	3.7966	3.8168	3.8372	3.8576	3.878	3.8983	3.9184	3.9383	3.9579	3.9772	3.9962	4.0149	4.0333	4.0513	4.069	4.0863	4.1032	4.1196	4.1356	4.1512
2.4194	2.5004	2.5816	2.6631	2.7449	2.8266	2.9076	2.9871	3.0637	3.1363	3.2042	3.2667	3.3232	3.3735	3.4178	3.4568	3.491	3.5212	3.5481	3.5725	3.5952	3.6169	3.6379	3.6582	3.6781	3.6977	3.7171	3.7365	3.756	3.7757	3.7957	3.8158	3.8361	3.8563	3.8765	3.8967	3.9167	3.9364	3.9559	3.9752	3.9942	4.0128	4.0312	4.0492	4.0669	4.0842	4.1011	4.1177	4.1337	4.1494
2.4193	2.5001	2.5811	2.6625	2.7441	2.8256	2.9065	2.9858	3.0623	3.1347	3.2024	3.2648	3.3213	3.3714	3.4157	3.4548	3.4892	3.5195	3.5466	3.5712	3.5941	3.616	3.6371	3.6575	3.6775	3.6971	3.7165	3.7359	3.7553	3.775	3.7948	3.8148	3.8349	3.855	3.8751	3.8951	3.9149	3.9346	3.954	3.9732	3.9921	4.0108	4.0291	4.0471	4.0648	4.0821	4.0991	4.1157	4.1319	4.1476
2.4191	2.4998	2.5806	2.6618	2.7433	2.8247	2.9054	2.9845	3.0608	3.1331	3.2007	3.2629	3.3193	3.3694	3.4137	3.4528	3.4873	3.5178	3.5451	3.5699	3.593	3.615	3.6362	3.6568	3.6768	3.6965	3.7159	3.7352	3.7546	3.7742	3.794	3.8138	3.8338	3.8537	3.8736	3.8935	3.9132	3.9328	3.9521	3.9712	3.9901	4.0087	4.027	4.045	4.0627	4.0801	4.0971	4.1137	4.13	4.1458
2.419	2.4994	2.5801	2.6611	2.7425	2.8237	2.9043	2.9833	3.0594	3.1315	3.1989	3.261	3.3173	3.3673	3.4116	3.4508	3.4854	3.5161	3.5435	3.5686	3.5919	3.6141	3.6354	3.6561	3.6762	3.6959	3.7153	3.7346	3.754	3.7735	3.7931	3.8128	3.8326	3.8524	3.8722	3.8919	3.9115	3.9309	3.9502	3.9692	3.988	4.0066	4.0249	4.0429	4.0606	4.078	4.0951	4.1118	4.1281	4.144
2.4188	2.4991	2.5796	2.6605	2.7416	2.8227	2.9031	2.982	3.058	3.1299	3.1971	3.2591	3.3153	3.3653	3.4096	3.4488	3.4835	3.5143	3.542	3.5672	3.5907	3.6131	3.6346	3.6554	3.6755	3.6953	3.7147	3.734	3.7533	3.7727	3.7922	3.8118	3.8315	3.8511	3.8708	3.8903	3.9098	3.9291	3.9482	3.9672	3.986	4.0045	4.0228	4.0408	4.0585	4.076	4.0931	4.1098	4.1262	4.1422
2.4186	2.4987	2.5791	2.6598	2.7408	2.8217	2.902	2.9807	3.0565	3.1283	3.1954	3.2572	3.3133	3.3632	3.4075	3.4468	3.4816	3.5126	3.5405	3.5659	3.5896	3.6122	3.6338	3.6547	3.6749	3.6947	3.7141	3.7334	3.7526	3.772	3.7914	3.8108	3.8303	3.8498	3.8693	3.8887	3.9081	3.9273	3.9463	3.9652	3.9839	4.0024	4.0207	4.0387	4.0564	4.0739	4.091	4.1078	4.1243	4.1404
2.4185	2.4984	2.5786	2.6591	2.7399	2.8207	2.9009	2.9794	3.055	3.1267	3.1936	3.2553	3.3113	3.3612	3.4055	3.4448	3.4797	3.5109	3.539	3.5646	3.5885	3.6112	3.633	3.654	3.6743	3.6941	3.7136	3.7328	3.752	3.7712	3.7905	3.8098	3.8292	3.8486	3.8679	3.8872	3.9064	3.9255	3.9444	3.9633	3.9819	4.0004	4.0186	4.0366	4.0544	4.0718	4.089	4.1059	4.1224	4.1386
2.4183	2.4981	2.5781	2.6584	2.7391	2.8198	2.8997	2.9781	3.0536	3.125	3.1918	3.2534	3.3093	3.3591	3.4034	3.4428	3.4778	3.5092	3.5374	3.5633	3.5874	3.6103	3.6322	3.6533	3.6737	3.6935	3.713	3.7322	3.7513	3.7705	3.7897	3.8089	3.8281	3.8473	3.8665	3.8856	3.9047	3.9237	3.9425	3.9613	3.9799	3.9983	4.0165	4.0345	4.0523	4.0698	4.087	4.1039	4.1205	4.1368
2.4182	2.4977	2.5775	2.6577	2.7383	2.8188	2.8986	2.9768	3.0521	3.1234	3.19	3.2515	3.3073	3.3571	3.4014	3.4408	3.4759	3.5074	3.5359	3.562	3.5863	3.6094	3.6314	3.6526	3.673	3.6929	3.7124	3.7316	3.7507	3.7697	3.7888	3.8079	3.827	3.846	3.8651	3.8841	3.903	3.9219	3.9407	3.9593	3.9779	3.9962	4.0144	4.0324	4.0502	4.0678	4.085	4.102	4.1187	4.135
2.418	2.4974	2.577	2.657	2.7374	2.8178	2.8974	2.9755	3.0507	3.1218	3.1883	3.2496	3.3052	3.355	3.3993	3.4388	3.4741	3.5057	3.5344	3.5607	3.5852	3.6084	3.6306	3.6519	3.6724	3.6924	3.7118	3.731	3.75	3.769	3.788	3.8069	3.8259	3.8448	3.8637	3.8825	3.9013	3.9201	3.9388	3.9574	3.9759	3.9942	4.0124	4.0304	4.0482	4.0657	4.083	4.1001	4.1168	4.1332
2.4179	2.4971	2.5765	2.6563	2.7366	2.8168	2.8963	2.9742	3.0492	3.1202	3.1865	3.2477	3.3033	3.353	3.3973	3.4368	3.4722	3.504	3.5329	3.5594	3.5841	3.6075	3.6298	3.6512	3.6718	3.6918	3.7113	3.7304	3.7494	3.7683	3.7871	3.806	3.8248	3.8435	3.8623	3.881	3.8997	3.9183	3.9369	3.9554	3.9739	3.9922	4.0103	4.0283	4.0461	4.0637	4.0811	4.0982	4.115	4.1315
2.4177	2.4967	2.576	2.6557	2.7357	2.8158	2.8952	2.9729	3.0477	3.1186	3.1847	3.2458	3.3013	3.351	3.3953	3.4349	3.4704	3.5024	3.5314	3.5581	3.583	3.6066	3.6291	3.6505	3.6712	3.6912	3.7107	3.7298	3.7488	3.7676	3.7863	3.805	3.8237	3.8423	3.8609	3.8794	3.898	3.9165	3.9351	3.9535	3.9719	3.9902	4.0083	4.0263	4.0441	4.0617	4.0791	4.0962	4.1131	4.1297
2.4175	2.4964	2.5755	2.655	2.7349	2.8148	2.894	2.9716	3.0463	3.1169	3.1829	3.2439	3.2993	3.3489	3.3933	3.4329	3.4685	3.5007	3.53	3.5569	3.582	3.6057	3.6283	3.6499	3.6706	3.6907	3.7102	3.7293	3.7481	3.7668	3.7855	3.8041	3.8226	3.841	3.8595	3.8779	3.8964	3.9148	3.9332	3.9516	3.9699	3.9881	4.0063	4.0243	4.0421	4.0597	4.0772	4.0944	4.1113	4.1279
2.4174	2.496	2.575	2.6543	2.7341	2.8138	2.8929	2.9703	3.0449	3.1153	3.1812	3.242	3.2973	3.3469	3.3913	3.431	3.4667	3.499	3.5285	3.5556	3.5809	3.6048	3.6275	3.6492	3.67	3.6901	3.7096	3.7287	3.7475	3.7661	3.7847	3.8031	3.8215	3.8398	3.8581	3.8764	3.8947	3.9131	3.9314	3.9497	3.968	3.9862	4.0043	4.0222	4.0401	4.0577	4.0752	4.0925	4.1095	4.1262
2.4172	2.4957	2.5745	2.6536	2.7333	2.8129	2.8918	2.9691	3.0434	3.1137	3.1795	3.2401	3.2954	3.3449	3.3893	3.4291	3.4649	3.4974	3.527	3.5544	3.5798	3.6039	3.6268	3.6486	3.6694	3.6896	3.7091	3.7281	3.7469	3.7654	3.7839	3.8022	3.8204	3.8386	3.8568	3.8749	3.8931	3.9113	3.9296	3.9478	3.966	3.9842	4.0023	4.0202	4.0381	4.0558	4.0733	4.0906	4.1077	4.1245
2.4171	2.4954	2.574	2.653	2.7324	2.8119	2.8907	2.9678	3.042	3.1122	3.1777	3.2383	3.2934	3.343	3.3873	3.4272	3.4631	3.4957	3.5256	3.5531	3.5788	3.603	3.626	3.6479	3.6689	3.689	3.7085	3.7276	3.7463	3.7647	3.7831	3.8013	3.8194	3.8374	3.8554	3.8735	3.8915	3.9096	3.9278	3.9459	3.9641	3.9822	4.0003	4.0183	4.0361	4.0538	4.0714	4.0887	4.1059	4.1228
2.4169	2.495	2.5735	2.6523	2.7316	2.8109	2.8896	2.9665	3.0406	3.1106	3.176	3.2365	3.2915	3.341	3.3854	3.4253	3.4613	3.4941	3.5242	3.5519	3.5778	3.6021	3.6253	3.6473	3.6683	3.6885	3.708	3.727	3.7457	3.7641	3.7823	3.8003	3.8183	3.8362	3.8541	3.872	3.8899	3.9079	3.926	3.9441	3.9622	3.9803	3.9983	4.0163	4.0342	4.0519	4.0695	4.0869	4.1041	4.1211
2.4167	2.4947	2.573	2.6517	2.7308	2.81	2.8885	2.9653	3.0392	3.1091	3.1743	3.2346	3.2896	3.3391	3.3835	3.4234	3.4596	3.4925	3.5228	3.5507	3.5767	3.6013	3.6245	3.6466	3.6677	3.6879	3.7075	3.7265	3.7451	3.7634	3.7815	3.7994	3.8173	3.835	3.8528	3.8705	3.8884	3.9063	3.9242	3.9423	3.9603	3.9784	3.9964	4.0144	4.0322	4.05	4.0676	4.0851	4.1024	4.1194
2.4166	2.4944	2.5725	2.651	2.73	2.8091	2.8874	2.9641	3.0378	3.1075	3.1727	3.2329	3.2878	3.3372	3.3815	3.4216	3.4578	3.4909	3.5214	3.5495	3.5757	3.6004	3.6238	3.646	3.6671	3.6874	3.707	3.7259	3.7445	3.7627	3.7807	3.7985	3.8163	3.8339	3.8515	3.8691	3.8868	3.9046	3.9225	3.9405	3.9585	3.9765	3.9945	4.0124	4.0303	4.0481	4.0658	4.0833	4.1006	4.1178
2.4164	2.4941	2.572	2.6504	2.7293	2.8082	2.8864	2.9629	3.0365	3.106	3.171	3.2311	3.2859	3.3353	3.3797	3.4197	3.4561	3.4894	3.52	3.5483	3.5747	3.5996	3.6231	3.6454	3.6666	3.6869	3.7064	3.7254	3.7439	3.762	3.7799	3.7977	3.8152	3.8327	3.8502	3.8677	3.8853	3.903	3.9208	3.9387	3.9566	3.9746	3.9926	4.0105	4.0284	4.0462	4.0639	4.0815	4.0989	4.1161
2.4163	2.4938	2.5715	2.6498	2.7285	2.8073	2.8853	2.9617	3.0351	3.1045	3.1694	3.2293	3.2841	3.3334	3.3778	3.4179	3.4544	3.4878	3.5186	3.5471	3.5737	3.5987	3.6224	3.6447	3.666	3.6864	3.7059	3.7249	3.7433	3.7614	3.7792	3.7968	3.8142	3.8316	3.8489	3.8663	3.8838	3.9014	3.9191	3.9369	3.9548	3.9728	3.9907	4.0087	4.0266	4.0444	4.0621	4.0798	4.0972	4.1145
2.4161	2.4934	2.5711	2.6491	2.7277	2.8064	2.8843	2.9605	3.0338	3.1031	3.1678	3.2276	3.2823	3.3316	3.376	3.4162	3.4527	3.4863	3.5173	3.546	3.5728	3.5979	3.6217	3.6441	3.6655	3.6859	3.7054	3.7243	3.7427	3.7607	3.7784	3.7959	3.8132	3.8305	3.8477	3.8649	3.8823	3.8998	3.9174	3.9352	3.953	3.9709	3.9889	4.0068	4.0247	4.0426	4.0604	4.078	4.0955	4.1129
2.4159	2.4931	2.5706	2.6485	2.727	2.8055	2.8833	2.9594	3.0325	3.1016	3.1662	3.2259	3.2805	3.3298	3.3742	3.4144	3.4511	3.4848	3.516	3.5448	3.5718	3.5971	3.621	3.6435	3.6649	3.6854	3.7049	3.7238	3.7421	3.7601	3.7777	3.7951	3.8123	3.8294	3.8464	3.8636	3.8808	3.8982	3.9158	3.9335	3.9513	3.9691	3.987	4.005	4.0229	4.0408	4.0586	4.0763	4.0939	4.1113
2.4158	2.4928	2.5702	2.6479	2.7263	2.8046	2.8823	2.9582	3.0312	3.1002	3.1646	3.2243	3.2788	3.328	3.3724	3.4127	3.4495	3.4833	3.5147	3.5437	3.5708	3.5963	3.6203	3.6429	3.6644	3.6849	3.7044	3.7233	3.7416	3.7594	3.777	3.7942	3.8113	3.8283	3.8452	3.8622	3.8793	3.8967	3.9141	3.9318	3.9495	3.9673	3.9852	4.0032	4.0211	4.039	4.0569	4.0746	4.0923	4.1098
2.4156	2.4925	2.5697	2.6474	2.7256	2.8038	2.8813	2.9571	3.03	3.0988	3.1631	3.2226	3.277	3.3262	3.3707	3.411	3.4479	3.4819	3.5134	3.5426	3.5699	3.5955	3.6196	3.6424	3.6639	3.6844	3.704	3.7228	3.741	3.7588	3.7762	3.7934	3.8104	3.8272	3.844	3.8609	3.8779	3.8951	3.9125	3.9301	3.9478	3.9656	3.9835	4.0014	4.0193	4.0373	4.0551	4.0729	4.0907	4.1082
2.4155	2.4922	2.5693	2.6468	2.7249	2.803	2.8804	2.956	3.0288	3.0974	3.1616	3.221	3.2754	3.3245	3.3689	3.4093	3.4463	3.4805	3.5121	3.5415	3.569	3.5947	3.619	3.6418	3.6634	3.6839	3.7035	3.7223	3.7405	3.7582	3.7755	3.7926	3.8094	3.8261	3.8428	3.8596	3.8765	3.8936	3.9109	3.9284	3.9461	3.9639	3.9817	3.9996	4.0176	4.0355	4.0534	4.0713	4.0891	4.1067
2.4153	2.4919	2.5688	2.6462	2.7242	2.8022	2.8794	2.955	3.0276	3.0961	3.1601	3.2194	3.2737	3.3228	3.3672	3.4077	3.4448	3.479	3.5109	3.5405	3.5681	3.594	3.6183	3.6412	3.6629	3.6834	3.703	3.7218	3.7399	3.7576	3.7748	3.7918	3.8085	3.8251	3.8417	3.8583	3.8751	3.8921	3.9094	3.9268	3.9444	3.9622	3.98	3.9979	4.0159	4.0338	4.0518	4.0697	4.0875	4.1052
2.4152	2.4916	2.5684	2.6457	2.7235	2.8014	2.8785	2.9539	3.0264	3.0948	3.1587	3.2179	3.2721	3.3211	3.3656	3.4061	3.4432	3.4777	3.5096	3.5394	3.5672	3.5932	3.6177	3.6406	3.6624	3.6829	3.7025	3.7213	3.7394	3.757	3.7741	3.791	3.8076	3.8241	3.8405	3.857	3.8737	3.8907	3.9078	3.9252	3.9428	3.9605	3.9783	3.9962	4.0142	4.0321	4.0501	4.0681	4.086	4.1037
2.415	2.4914	2.568	2.6451	2.7228	2.8006	2.8776	2.9529	3.0252	3.0935	3.1572	3.2163	3.2704	3.3195	3.3639	3.4045	3.4417	3.4763	3.5084	3.5384	3.5663	3.5925	3.617	3.6401	3.6619	3.6825	3.7021	3.7208	3.7389	3.7564	3.7735	3.7902	3.8067	3.8231	3.8394	3.8558	3.8724	3.8892	3.9063	3.9236	3.9411	3.9588	3.9766	3.9945	4.0125	4.0305	4.0485	4.0665	4.0844	4.1023
2.4148	2.4911	2.5676	2.6446	2.7222	2.7998	2.8767	2.9519	3.024	3.0922	3.1558	3.2148	3.2689	3.3179	3.3623	3.4029	3.4403	3.4749	3.5072	3.5373	3.5654	3.5917	3.6164	3.6395	3.6614	3.682	3.7016	3.7203	3.7384	3.7558	3.7728	3.7894	3.8058	3.8221	3.8383	3.8546	3.871	3.8878	3.9048	3.9221	3.9395	3.9572	3.975	3.9929	4.0108	4.0289	4.0469	4.0649	4.0829	4.1009
2.4147	2.4908	2.5672	2.6441	2.7215	2.7991	2.8758	2.9509	3.0229	3.0909	3.1545	3.2133	3.2673	3.3163	3.3607	3.4014	3.4388	3.4736	3.5061	3.5363	3.5646	3.591	3.6158	3.639	3.6609	3.6815	3.7012	3.7199	3.7378	3.7552	3.7721	3.7887	3.8049	3.8211	3.8372	3.8533	3.8697	3.8864	3.9034	3.9205	3.938	3.9556	3.9733	3.9912	4.0092	4.0272	4.0453	4.0634	4.0815	4.0994
2.4145	2.4905	2.5668	2.6436	2.7209	2.7983	2.875	2.9499	3.0218	3.0897	3.1531	3.2119	3.2658	3.3147	3.3592	3.3999	3.4374	3.4723	3.5049	3.5353	3.5637	3.5903	3.6152	3.6385	3.6604	3.6811	3.7007	3.7194	3.7373	3.7546	3.7715	3.7879	3.8041	3.8201	3.8361	3.8522	3.8684	3.885	3.9019	3.919	3.9364	3.954	3.9717	3.9896	4.0076	4.0257	4.0438	4.0619	4.08	4.098
2.4144	2.4902	2.5664	2.6431	2.7203	2.7976	2.8742	2.9489	3.0207	3.0885	3.1518	3.2104	3.2643	3.3132	3.3576	3.3984	3.436	3.471	3.5038	3.5344	3.5629	3.5896	3.6146	3.6379	3.6599	3.6806	3.7003	3.7189	3.7368	3.7541	3.7708	3.7872	3.8032	3.8191	3.835	3.851	3.8672	3.8837	3.9005	3.9175	3.9349	3.9524	3.9701	3.988	4.006	4.0241	4.0422	4.0604	4.0786	4.0967
2.4142	2.49	2.566	2.6426	2.7197	2.7969	2.8733	2.948	3.0197	3.0873	3.1505	3.209	3.2628	3.3116	3.3561	3.3969	3.4346	3.4698	3.5027	3.5334	3.5621	3.5889	3.614	3.6374	3.6595	3.6802	3.6998	3.7185	3.7363	3.7535	3.7702	3.7864	3.8024	3.8182	3.8339	3.8498	3.8659	3.8823	3.8991	3.9161	3.9334	3.9509	3.9686	3.9865	4.0045	4.0225	4.0407	4.0589	4.0771	4.0953
2.4141	2.4897	2.5656	2.6421	2.7191	2.7962	2.8725	2.9471	3.0186	3.0861	3.1492	3.2076	3.2613	3.3102	3.3547	3.3955	3.4332	3.4685	3.5016	3.5325	3.5613	3.5882	3.6134	3.6369	3.659	3.6798	3.6994	3.718	3.7358	3.753	3.7695	3.7857	3.8016	3.8172	3.8329	3.8487	3.8647	3.881	3.8977	3.9146	3.9319	3.9494	3.967	3.9849	4.0029	4.021	4.0392	4.0575	4.0757	4.094
2.4139	2.4895	2.5653	2.6416	2.7185	2.7955	2.8717	2.9462	3.0176	3.085	3.1479	3.2063	3.2599	3.3087	3.3532	3.394	3.4319	3.4673	3.5005	3.5315	3.5605	3.5875	3.6128	3.6364	3.6585	3.6793	3.699	3.7176	3.7354	3.7524	3.7689	3.785	3.8007	3.8163	3.8319	3.8475	3.8634	3.8797	3.8963	3.9132	3.9304	3.9479	3.9655	3.9834	4.0014	4.0195	4.0378	4.056	4.0744	4.0927
2.4138	2.4892	2.5649	2.6411	2.718	2.7949	2.871	2.9453	3.0166	3.0838	3.1467	3.205	3.2585	3.3073	3.3518	3.3926	3.4306	3.4661	3.4994	3.5306	3.5597	3.5869	3.6122	3.6359	3.6581	3.6789	3.6986	3.7172	3.7349	3.7519	3.7683	3.7843	3.7999	3.8154	3.8309	3.8464	3.8622	3.8784	3.895	3.9118	3.929	3.9464	3.964	3.9819	3.9999	4.0181	4.0363	4.0546	4.073	4.0914
2.4136	2.4889	2.5646	2.6407	2.7174	2.7942	2.8702	2.9444	3.0156	3.0827	3.1455	3.2036	3.2571	3.3059	3.3504	3.3913	3.4293	3.4649	3.4984	3.5297	3.559	3.5862	3.6117	3.6354	3.6576	3.6785	3.6981	3.7167	3.7344	3.7514	3.7677	3.7836	3.7992	3.8145	3.8299	3.8453	3.8611	3.8772	3.8936	3.9104	3.9275	3.9449	3.9626	3.9804	3.9984	4.0166	4.0349	4.0532	4.0717	4.0901
2.4135	2.4887	2.5642	2.6402	2.7169	2.7936	2.8695	2.9436	3.0146	3.0816	3.1443	3.2024	3.2558	3.3045	3.349	3.3899	3.428	3.4638	3.4974	3.5288	3.5582	3.5856	3.6111	3.6349	3.6572	3.6781	3.6977	3.7163	3.734	3.7508	3.7671	3.7829	3.7984	3.8137	3.8289	3.8443	3.8599	3.8759	3.8923	3.9091	3.9261	3.9435	3.9611	3.979	3.997	4.0152	4.0335	4.0519	4.0703	4.0888
2.4133	2.4884	2.5639	2.6398	2.7164	2.793	2.8688	2.9427	3.0137	3.0806	3.1431	3.2011	3.2544	3.3031	3.3476	3.3886	3.4268	3.4626	3.4964	3.5279	3.5575	3.585	3.6106	3.6345	3.6568	3.6777	3.6973	3.7159	3.7335	3.7503	3.7665	3.7822	3.7976	3.8128	3.8279	3.8432	3.8588	3.8747	3.891	3.9077	3.9248	3.9421	3.9597	3.9775	3.9956	4.0138	4.0321	4.0505	4.069	4.0876
2.4132	2.4882	2.5635	2.6394	2.7158	2.7923	2.8681	2.9419	3.0128	3.0795	3.1419	3.1999	3.2531	3.3018	3.3463	3.3873	3.4256	3.4615	3.4954	3.5271	3.5567	3.5843	3.61	3.634	3.6563	3.6773	3.6969	3.7155	3.733	3.7498	3.7659	3.7816	3.7969	3.8119	3.827	3.8422	3.8576	3.8735	3.8898	3.9064	3.9234	3.9407	3.9583	3.9761	3.9942	4.0124	4.0307	4.0492	4.0678	4.0864
2.413	2.488	2.5632	2.639	2.7153	2.7918	2.8674	2.9411	3.0119	3.0785	3.1408	3.1986	3.2519	3.3005	3.345	3.386	3.4244	3.4604	3.4944	3.5263	3.556	3.5837	3.6095	3.6335	3.6559	3.6769	3.6965	3.7151	3.7326	3.7493	3.7654	3.7809	3.7961	3.8111	3.8261	3.8411	3.8565	3.8723	3.8885	3.9051	3.9221	3.9394	3.9569	3.9747	3.9928	4.011	4.0294	4.0479	4.0665	4.0851
2.4129	2.4877	2.5629	2.6386	2.7148	2.7912	2.8667	2.9404	3.011	3.0775	3.1397	3.1975	3.2506	3.2992	3.3437	3.3848	3.4232	3.4593	3.4934	3.5254	3.5553	3.5831	3.609	3.6331	3.6555	3.6765	3.6962	3.7147	3.7322	3.7488	3.7648	3.7803	3.7954	3.8103	3.8251	3.8401	3.8554	3.8712	3.8873	3.9039	3.9208	3.938	3.9556	3.9734	3.9914	4.0097	4.0281	4.0466	4.0653	4.084
2.4127	2.4875	2.5626	2.6382	2.7144	2.7906	2.866	2.9396	3.0101	3.0765	3.1386	3.1963	3.2494	3.2979	3.3424	3.3836	3.422	3.4583	3.4925	3.5246	3.5546	3.5825	3.6085	3.6326	3.6551	3.6761	3.6958	3.7143	3.7317	3.7483	3.7643	3.7796	3.7947	3.8095	3.8242	3.8392	3.8544	3.87	3.8861	3.9026	3.9195	3.9367	3.9542	3.972	3.9901	4.0083	4.0268	4.0453	4.064	4.0828
2.4126	2.4873	2.5623	2.6378	2.7139	2.7901	2.8654	2.9388	3.0093	3.0756	3.1376	3.1951	3.2482	3.2967	3.3412	3.3824	3.4209	3.4573	3.4916	3.5238	3.5539	3.582	3.608	3.6322	3.6547	3.6757	3.6954	3.7139	3.7313	3.7479	3.7637	3.779	3.794	3.8087	3.8234	3.8382	3.8533	3.8689	3.8849	3.9014	3.9182	3.9354	3.9529	3.9707	3.9888	4.007	4.0255	4.0441	4.0628	4.0817
2.4124	2.487	2.562	2.6374	2.7134	2.7895	2.8648	2.9381	3.0084	3.0746	3.1365	3.194	3.247	3.2955	3.34	3.3812	3.4198	3.4562	3.4907	3.523	3.5533	3.5814	3.6075	3.6317	3.6543	3.6754	3.695	3.7135	3.7309	3.7474	3.7632	3.7784	3.7933	3.8079	3.8225	3.8372	3.8523	3.8678	3.8838	3.9002	3.917	3.9341	3.9516	3.9694	3.9875	4.0057	4.0242	4.0429	4.0617	4.0805
2.4123	2.4868	2.5617	2.637	2.713	2.789	2.8641	2.9374	3.0076	3.0737	3.1355	3.1929	3.2458	3.2943	3.3388	3.38	3.4187	3.4552	3.4898	3.5223	3.5526	3.5808	3.607	3.6313	3.6539	3.675	3.6947	3.7131	3.7305	3.7469	3.7627	3.7778	3.7926	3.8071	3.8216	3.8363	3.8513	3.8667	3.8826	3.899	3.9157	3.9329	3.9504	3.9681	3.9862	4.0045	4.023	4.0417	4.0605	4.0794
2.4121	2.4866	2.5614	2.6367	2.7126	2.7885	2.8636	2.9367	3.0068	3.0728	3.1345	3.1919	3.2447	3.2931	3.3376	3.3789	3.4176	3.4543	3.4889	3.5215	3.552	3.5803	3.6065	3.6309	3.6535	3.6746	3.6943	3.7127	3.7301	3.7465	3.7621	3.7772	3.7919	3.8064	3.8208	3.8354	3.8503	3.8656	3.8815	3.8978	3.9145	3.9316	3.9491	3.9669	3.9849	4.0032	4.0218	4.0405	4.0593	4.0783
2.412	2.4864	2.5611	2.6363	2.7121	2.788	2.863	2.9361	3.006	3.072	3.1336	3.1908	3.2436	3.292	3.3365	3.3778	3.4166	3.4533	3.4881	3.5208	3.5513	3.5797	3.6061	3.6305	3.6532	3.6743	3.6939	3.7124	3.7297	3.746	3.7616	3.7766	3.7912	3.8056	3.82	3.8344	3.8493	3.8646	3.8804	3.8967	3.9133	3.9304	3.9479	3.9656	3.9837	4.002	4.0206	4.0393	4.0582	4.0772
2.4118	2.4862	2.5608	2.636	2.7117	2.7875	2.8624	2.9354	3.0053	3.0711	3.1326	3.1898	3.2425	3.2909	3.3354	3.3767	3.4155	3.4524	3.4872	3.52	3.5507	3.5792	3.6056	3.6301	3.6528	3.6739	3.6936	3.712	3.7293	3.7456	3.7611	3.7761	3.7906	3.8049	3.8191	3.8336	3.8483	3.8636	3.8793	3.8955	3.9122	3.9292	3.9467	3.9644	3.9825	4.0008	4.0194	4.0382	4.0571	4.0762
2.4117	2.486	2.5605	2.6356	2.7113	2.787	2.8619	2.9348	3.0046	3.0703	3.1317	3.1888	3.2414	3.2898	3.3343	3.3757	3.4145	3.4514	3.4864	3.5193	3.5501	3.5787	3.6051	3.6297	3.6524	3.6736	3.6932	3.7116	3.7289	3.7451	3.7606	3.7755	3.79	3.8042	3.8183	3.8327	3.8474	3.8625	3.8782	3.8944	3.911	3.9281	3.9455	3.9632	3.9813	3.9997	4.0182	4.037	4.056	4.0751
2.4115	2.4858	2.5603	2.6353	2.7109	2.7866	2.8613	2.9341	3.0038	3.0695	3.1308	3.1878	3.2404	3.2887	3.3332	3.3746	3.4135	3.4505	3.4856	3.5186	3.5495	3.5782	3.6047	3.6293	3.6521	3.6732	3.6929	3.7113	3.7285	3.7447	3.7601	3.7749	3.7893	3.8035	3.8176	3.8318	3.8464	3.8616	3.8772	3.8933	3.9099	3.9269	3.9443	3.9621	3.9801	3.9985	4.0171	4.0359	4.055	4.0741
2.4114	2.4856	2.56	2.635	2.7106	2.7861	2.8608	2.9335	3.0031	3.0687	3.1299	3.1868	3.2394	3.2877	3.3322	3.3736	3.4126	3.4496	3.4848	3.5179	3.5489	3.5777	3.6043	3.6289	3.6517	3.6729	3.6926	3.7109	3.7281	3.7443	3.7597	3.7744	3.7887	3.8028	3.8168	3.831	3.8455	3.8606	3.8762	3.8923	3.9088	3.9258	3.9432	3.9609	3.979	3.9974	4.016	4.0349	4.0539	4.0731
2.4112	2.4854	2.5598	2.6347	2.7102	2.7857	2.8603	2.9329	3.0025	3.0679	3.129	3.1859	3.2384	3.2866	3.3312	3.3726	3.4116	3.4488	3.484	3.5173	3.5483	3.5772	3.6038	3.6285	3.6514	3.6726	3.6922	3.7106	3.7277	3.7439	3.7592	3.7739	3.7881	3.8021	3.816	3.8301	3.8446	3.8596	3.8752	3.8912	3.9077	3.9247	3.9421	3.9598	3.9779	3.9962	4.0149	4.0338	4.0529	4.0721
2.4111	2.4852	2.5595	2.6344	2.7098	2.7853	2.8598	2.9324	3.0018	3.0671	3.1282	3.185	3.2374	3.2856	3.3302	3.3716	3.4107	3.4479	3.4833	3.5166	3.5478	3.5767	3.6034	3.6281	3.651	3.6722	3.6919	3.7102	3.7274	3.7435	3.7587	3.7733	3.7875	3.8014	3.8153	3.8293	3.8437	3.8587	3.8742	3.8902	3.9067	3.9236	3.941	3.9587	3.9768	3.9951	4.0138	4.0327	4.0519	4.0712
2.4109	2.485	2.5593	2.6341	2.7095	2.7849	2.8593	2.9318	3.0011	3.0664	3.1274	3.1841	3.2365	3.2847	3.3292	3.3707	3.4098	3.4471	3.4825	3.516	3.5472	3.5762	3.603	3.6278	3.6507	3.6719	3.6916	3.7099	3.727	3.7431	3.7583	3.7728	3.7869	3.8008	3.8146	3.8285	3.8429	3.8578	3.8732	3.8892	3.9056	3.9225	3.9399	3.9576	3.9757	3.9941	4.0128	4.0317	4.0509	4.0702
2.4108	2.4848	2.5591	2.6338	2.7092	2.7845	2.8589	2.9313	3.0005	3.0657	3.1266	3.1832	3.2356	3.2837	3.3282	3.3697	3.4089	3.4463	3.4818	3.5153	3.5467	3.5757	3.6026	3.6274	3.6503	3.6716	3.6913	3.7096	3.7267	3.7427	3.7578	3.7723	3.7863	3.8001	3.8139	3.8278	3.842	3.8569	3.8723	3.8882	3.9046	3.9215	3.9388	3.9565	3.9746	3.993	4.0117	4.0307	4.0499	4.0693
2.4107	2.4846	2.5588	2.6335	2.7088	2.7841	2.8584	2.9307	2.9999	3.065	3.1258	3.1824	3.2347	3.2828	3.3273	3.3688	3.4081	3.4455	3.4811	3.5147	3.5462	3.5753	3.6022	3.627	3.65	3.6713	3.691	3.7093	3.7263	3.7423	3.7574	3.7718	3.7858	3.7995	3.8132	3.827	3.8412	3.856	3.8713	3.8872	3.9036	3.9205	3.9378	3.9555	3.9736	3.992	4.0107	4.0297	4.0489	4.0684
2.4105	2.4844	2.5586	2.6333	2.7085	2.7837	2.858	2.9302	2.9993	3.0643	3.125	3.1815	3.2338	3.2819	3.3264	3.3679	3.4072	3.4447	3.4804	3.5141	3.5456	3.5748	3.6018	3.6267	3.6497	3.671	3.6907	3.7089	3.726	3.7419	3.757	3.7713	3.7852	3.7989	3.8125	3.8262	3.8404	3.8551	3.8704	3.8863	3.9026	3.9195	3.9368	3.9544	3.9725	3.991	4.0097	4.0287	4.048	4.0675
2.4104	2.4842	2.5584	2.633	2.7082	2.7834	2.8576	2.9297	2.9987	3.0637	3.1243	3.1807	3.2329	3.281	3.3255	3.3671	3.4064	3.444	3.4798	3.5135	3.5451	3.5744	3.6014	3.6263	3.6494	3.6707	3.6904	3.7086	3.7256	3.7415	3.7565	3.7708	3.7847	3.7983	3.8118	3.8255	3.8396	3.8543	3.8695	3.8853	3.9017	3.9185	3.9358	3.9534	3.9715	3.99	4.0087	4.0278	4.0471	4.0666
2.4102	2.4841	2.5582	2.6328	2.7079	2.783	2.8572	2.9293	2.9982	3.063	3.1236	3.18	3.2321	3.2801	3.3246	3.3662	3.4056	3.4432	3.4791	3.513	3.5446	3.574	3.601	3.626	3.6491	3.6704	3.6901	3.7083	3.7253	3.7412	3.7561	3.7704	3.7842	3.7977	3.8111	3.8248	3.8388	3.8534	3.8687	3.8844	3.9007	3.9175	3.9348	3.9525	3.9705	3.989	4.0077	4.0268	4.0462	4.0657
2.4101	2.4839	2.558	2.6325	2.7076	2.7827	2.8568	2.9288	2.9976	3.0624	3.1229	3.1792	3.2313	3.2793	3.3238	3.3654	3.4048	3.4425	3.4785	3.5124	3.5441	3.5735	3.6007	3.6257	3.6488	3.6701	3.6898	3.708	3.725	3.7408	3.7557	3.7699	3.7836	3.7971	3.8105	3.8241	3.8381	3.8526	3.8678	3.8835	3.8998	3.9166	3.9338	3.9515	3.9696	3.988	4.0068	4.0259	4.0453	4.0649
2.4099	2.4837	2.5578	2.6323	2.7074	2.7824	2.8564	2.9283	2.9971	3.0618	3.1222	3.1784	3.2305	3.2785	3.323	3.3646	3.404	3.4418	3.4778	3.5118	3.5437	3.5731	3.6003	3.6254	3.6485	3.6698	3.6895	3.7077	3.7246	3.7404	3.7553	3.7695	3.7831	3.7965	3.8099	3.8234	3.8373	3.8518	3.867	3.8827	3.8989	3.9156	3.9329	3.9505	3.9686	3.9871	4.0059	4.025	4.0444	4.064
2.4098	2.4836	2.5576	2.6321	2.7071	2.7821	2.856	2.9279	2.9966	3.0612	3.1216	3.1777	3.2297	3.2777	3.3222	3.3638	3.4033	3.4411	3.4772	3.5113	3.5432	3.5727	3.5999	3.625	3.6482	3.6695	3.6892	3.7074	3.7243	3.7401	3.7549	3.769	3.7826	3.796	3.8092	3.8227	3.8366	3.851	3.8661	3.8818	3.898	3.9147	3.9319	3.9496	3.9677	3.9861	4.005	4.0241	4.0435	4.0632
2.4097	2.4834	2.5574	2.6319	2.7069	2.7818	2.8557	2.9275	2.9961	3.0606	3.1209	3.177	3.229	3.2769	3.3214	3.3631	3.4026	3.4405	3.4766	3.5108	3.5427	3.5723	3.5996	3.6247	3.6479	3.6692	3.6889	3.7071	3.724	3.7397	3.7545	3.7686	3.7821	3.7954	3.8086	3.822	3.8359	3.8503	3.8653	3.881	3.8971	3.9138	3.931	3.9487	3.9668	3.9852	4.0041	4.0232	4.0427	4.0624
2.4095	2.4832	2.5572	2.6317	2.7066	2.7815	2.8553	2.9271	2.9957	3.0601	3.1203	3.1763	3.2283	3.2762	3.3206	3.3623	3.4019	3.4398	3.476	3.5103	3.5423	3.5719	3.5992	3.6244	3.6476	3.669	3.6886	3.7068	3.7237	3.7394	3.7541	3.7681	3.7817	3.7949	3.808	3.8214	3.8352	3.8495	3.8645	3.8801	3.8963	3.913	3.9302	3.9478	3.9659	3.9844	4.0032	4.0224	4.0419	4.0616
2.4094	2.4831	2.557	2.6315	2.7064	2.7812	2.855	2.9267	2.9952	3.0596	3.1197	3.1757	3.2276	3.2754	3.3199	3.3616	3.4012	3.4392	3.4755	3.5098	3.5419	3.5716	3.5989	3.6241	3.6473	3.6687	3.6884	3.7066	3.7234	3.7391	3.7538	3.7677	3.7812	3.7943	3.8075	3.8208	3.8345	3.8488	3.8638	3.8793	3.8955	3.9121	3.9293	3.9469	3.965	3.9835	4.0024	4.0216	4.0411	4.0609
2.4092	2.4829	2.5569	2.6313	2.7062	2.781	2.8547	2.9263	2.9948	3.0591	3.1191	3.1751	3.2269	3.2747	3.3192	3.3609	3.4005	3.4386	3.4749	3.5093	3.5414	3.5712	3.5986	3.6238	3.647	3.6684	3.6881	3.7063	3.7231	3.7387	3.7534	3.7673	3.7807	3.7938	3.8069	3.8201	3.8338	3.8481	3.863	3.8786	3.8947	3.9113	3.9285	3.9461	3.9642	3.9826	4.0015	4.0207	4.0403	4.0601
2.4091	2.4828	2.5567	2.6311	2.706	2.7807	2.8544	2.926	2.9943	3.0586	3.1186	3.1744	3.2262	3.274	3.3185	3.3602	3.3999	3.438	3.4744	3.5088	3.541	3.5708	3.5983	3.6235	3.6468	3.6682	3.6879	3.706	3.7228	3.7384	3.753	3.7669	3.7803	3.7933	3.8063	3.8195	3.8332	3.8474	3.8623	3.8778	3.8939	3.9105	3.9276	3.9452	3.9633	3.9818	4.0007	4.0199	4.0395	4.0594
2.409	2.4826	2.5566	2.6309	2.7058	2.7805	2.8541	2.9257	2.9939	3.0581	3.118	3.1738	3.2256	3.2734	3.3178	3.3596	3.3992	3.4374	3.4738	3.5084	3.5406	3.5705	3.5979	3.6232	3.6465	3.6679	3.6876	3.7058	3.7225	3.7381	3.7527	3.7665	3.7798	3.7928	3.8058	3.8189	3.8325	3.8467	3.8616	3.877	3.8931	3.9097	3.9268	3.9444	3.9625	3.981	3.9999	4.0192	4.0388	4.0587
2.4088	2.4825	2.5564	2.6307	2.7056	2.7803	2.8539	2.9253	2.9935	3.0576	3.1175	3.1733	3.2249	3.2727	3.3172	3.3589	3.3986	3.4368	3.4733	3.5079	3.5402	3.5701	3.5976	3.623	3.6462	3.6677	3.6874	3.7055	3.7223	3.7378	3.7524	3.7661	3.7794	3.7924	3.8053	3.8184	3.8319	3.8461	3.8609	3.8763	3.8923	3.9089	3.926	3.9436	3.9617	3.9802	3.9991	4.0184	4.038	4.058
2.4087	2.4823	2.5563	2.6306	2.7054	2.7801	2.8536	2.925	2.9932	3.0572	3.117	3.1727	3.2243	3.2721	3.3165	3.3583	3.398	3.4363	3.4728	3.5075	3.5399	3.5698	3.5973	3.6227	3.646	3.6674	3.6871	3.7052	3.722	3.7375	3.752	3.7658	3.779	3.7919	3.8048	3.8178	3.8313	3.8454	3.8602	3.8756	3.8916	3.9082	3.9253	3.9429	3.9609	3.9794	3.9984	4.0177	4.0373	4.0573
2.4085	2.4822	2.5561	2.6304	2.7052	2.7799	2.8534	2.9247	2.9928	3.0568	3.1165	3.1722	3.2238	3.2715	3.3159	3.3577	3.3975	3.4357	3.4724	3.507	3.5395	3.5695	3.5971	3.6224	3.6457	3.6672	3.6869	3.705	3.7217	3.7372	3.7517	3.7654	3.7786	3.7914	3.8042	3.8173	3.8307	3.8448	3.8595	3.8749	3.8909	3.9074	3.9245	3.9421	3.9602	3.9787	3.9976	4.0169	4.0366	4.0566
2.4084	2.4821	2.556	2.6303	2.7051	2.7797	2.8532	2.9244	2.9925	3.0564	3.1161	3.1716	3.2232	3.2709	3.3153	3.3571	3.3969	3.4352	3.4719	3.5066	3.5391	3.5691	3.5968	3.6222	3.6455	3.6669	3.6866	3.7047	3.7214	3.7369	3.7514	3.765	3.7782	3.791	3.8038	3.8167	3.8301	3.8442	3.8589	3.8742	3.8902	3.9067	3.9238	3.9414	3.9594	3.9779	3.9969	4.0162	4.0359	4.0559
2.4083	2.4819	2.5558	2.6302	2.7049	2.7795	2.8529	2.9242	2.9921	3.056	3.1156	3.1711	3.2227	3.2704	3.3148	3.3566	3.3964	3.4347	3.4714	3.5062	3.5388	3.5688	3.5965	3.6219	3.6453	3.6667	3.6864	3.7045	3.7212	3.7366	3.751	3.7647	3.7778	3.7906	3.8033	3.8162	3.8296	3.8436	3.8583	3.8736	3.8895	3.906	3.9231	3.9406	3.9587	3.9772	3.9962	4.0155	4.0352	4.0553
2.4081	2.4818	2.5557	2.63	2.7048	2.7794	2.8527	2.9239	2.9918	3.0556	3.1152	3.1707	3.2222	3.2698	3.3142	3.356	3.3959	3.4342	3.471	3.5058	3.5384	3.5685	3.5962	3.6217	3.645	3.6665	3.6862	3.7043	3.7209	3.7364	3.7507	3.7643	3.7774	3.7901	3.8028	3.8157	3.829	3.843	3.8576	3.8729	3.8888	3.9053	3.9224	3.9399	3.958	3.9765	3.9955	4.0148	4.0346	4.0547
2.408	2.4817	2.5556	2.6299	2.7047	2.7792	2.8526	2.9237	2.9915	3.0553	3.1148	3.1702	3.2217	3.2693	3.3137	3.3555	3.3954	3.4338	3.4706	3.5055	3.5381	3.5682	3.5959	3.6214	3.6448	3.6663	3.6859	3.704	3.7207	3.7361	3.7504	3.764	3.777	3.7897	3.8024	3.8152	3.8285	3.8424	3.857	3.8723	3.8882	3.9047	3.9217	3.9392	3.9573	3.9758	3.9948	4.0142	4.0339	4.0541
2.4078	2.4816	2.5555	2.6298	2.7045	2.7791	2.8524	2.9235	2.9913	3.0549	3.1144	3.1698	3.2212	3.2688	3.3132	3.355	3.3949	3.4333	3.4702	3.5051	3.5378	3.5679	3.5957	3.6212	3.6446	3.666	3.6857	3.7038	3.7204	3.7358	3.7501	3.7637	3.7767	3.7893	3.8019	3.8147	3.828	3.8419	3.8565	3.8717	3.8876	3.904	3.921	3.9386	3.9566	3.9751	3.9941	4.0135	4.0333	4.0535
2.4077	2.4814	2.5554	2.6297	2.7044	2.7789	2.8522	2.9233	2.991	3.0546	3.114	3.1693	3.2207	3.2683	3.3127	3.3545	3.3944	3.4329	3.4698	3.5048	3.5375	3.5677	3.5954	3.6209	3.6444	3.6658	3.6855	3.7036	3.7202	3.7356	3.7499	3.7634	3.7763	3.7889	3.8015	3.8142	3.8275	3.8413	3.8559	3.8711	3.8869	3.9034	3.9204	3.9379	3.956	3.9745	3.9935	4.0129	4.0327	4.0529
2.4076	2.4813	2.5553	2.6296	2.7043	2.7788	2.8521	2.9231	2.9908	3.0543	3.1137	3.1689	3.2203	3.2679	3.3122	3.354	3.394	3.4325	3.4694	3.5044	3.5372	3.5674	3.5952	3.6207	3.6441	3.6656	3.6853	3.7034	3.72	3.7353	3.7496	3.763	3.776	3.7885	3.8011	3.8138	3.827	3.8408	3.8553	3.8705	3.8863	3.9028	3.9197	3.9373	3.9553	3.9739	3.9929	4.0123	4.0321	4.0523
2.4074	2.4812	2.5552	2.6295	2.7042	2.7787	2.8519	2.9229	2.9905	3.054	3.1133	3.1686	3.2199	3.2674	3.3118	3.3536	3.3935	3.4321	3.469	3.5041	3.5369	3.5671	3.595	3.6205	3.6439	3.6654	3.6851	3.7031	3.7197	3.7351	3.7493	3.7627	3.7756	3.7882	3.8007	3.8134	3.8265	3.8403	3.8548	3.87	3.8858	3.9022	3.9191	3.9367	3.9547	3.9732	3.9922	4.0117	4.0315	4.0518
2.4073	2.4811	2.5551	2.6294	2.7042	2.7786	2.8518	2.9227	2.9903	3.0538	3.113	3.1682	3.2195	3.267	3.3113	3.3532	3.3931	3.4317	3.4687	3.5038	3.5366	3.5669	3.5947	3.6203	3.6437	3.6652	3.6849	3.7029	3.7195	3.7348	3.749	3.7624	3.7753	3.7878	3.8003	3.8129	3.826	3.8398	3.8543	3.8694	3.8852	3.9016	3.9185	3.9361	3.9541	3.9726	3.9916	4.0111	4.031	4.0512
2.4072	2.481	2.555	2.6294	2.7041	2.7785	2.8517	2.9226	2.9901	3.0535	3.1127	3.1679	3.2191	3.2666	3.3109	3.3528	3.3927	3.4313	3.4683	3.5035	3.5363	3.5666	3.5945	3.6201	3.6435	3.665	3.6847	3.7027	3.7193	3.7346	3.7488	3.7622	3.775	3.7875	3.7999	3.8125	3.8256	3.8394	3.8538	3.8689	3.8847	3.901	3.918	3.9355	3.9535	3.9721	3.9911	4.0105	4.0304	4.0507
2.407	2.4809	2.5549	2.6293	2.704	2.7784	2.8516	2.9224	2.9899	3.0533	3.1124	3.1675	3.2187	3.2662	3.3105	3.3524	3.3923	3.431	3.468	3.5032	3.536	3.5664	3.5943	3.6199	3.6433	3.6648	3.6845	3.7025	3.7191	3.7343	3.7485	3.7619	3.7747	3.7871	3.7995	3.8121	3.8252	3.8389	3.8533	3.8684	3.8841	3.9005	3.9174	3.9349	3.9529	3.9715	3.9905	4.01	4.0299	4.0502
2.4069	2.4808	2.5548	2.6292	2.704	2.7784	2.8515	2.9223	2.9898	3.053	3.1121	3.1672	3.2184	3.2658	3.3102	3.352	3.392	3.4306	3.4677	3.5029	3.5358	3.5662	3.5941	3.6197	3.6431	3.6646	3.6843	3.7023	3.7189	3.7341	3.7483	3.7616	3.7744	3.7868	3.7992	3.8117	3.8247	3.8384	3.8528	3.8679	3.8836	3.8999	3.9169	3.9344	3.9524	3.9709	3.99	4.0094	4.0294	4.0497
2.4067	2.4807	2.5548	2.6292	2.7039	2.7783	2.8514	2.9222	2.9896	3.0528	3.1119	3.1669	3.218	3.2655	3.3098	3.3516	3.3916	3.4303	3.4674	3.5026	3.5355	3.5659	3.5939	3.6195	3.6429	3.6644	3.6841	3.7021	3.7187	3.7339	3.748	3.7613	3.7741	3.7865	3.7988	3.8113	3.8243	3.838	3.8524	3.8674	3.8831	3.8994	3.9163	3.9338	3.9519	3.9704	3.9894	4.0089	4.0289	4.0492
2.4066	2.4806	2.5547	2.6291	2.7039	2.7783	2.8513	2.9221	2.9895	3.0527	3.1117	3.1666	3.2177	3.2652	3.3095	3.3513	3.3913	3.43	3.4671	3.5023	3.5353	3.5657	3.5937	3.6193	3.6428	3.6643	3.6839	3.7019	3.7185	3.7337	3.7478	3.7611	3.7738	3.7862	3.7985	3.811	3.824	3.8376	3.8519	3.867	3.8826	3.8989	3.9158	3.9333	3.9513	3.9699	3.9889	4.0084	4.0284	4.0487
2.4065	2.4805	2.5546	2.6291	2.7038	2.7782	2.8513	2.922	2.9893	3.0525	3.1114	3.1664	3.2175	3.2648	3.3091	3.351	3.391	3.4297	3.4668	3.5021	3.5351	3.5655	3.5935	3.6191	3.6426	3.6641	3.6838	3.7018	3.7183	3.7335	3.7476	3.7608	3.7735	3.7859	3.7982	3.8106	3.8236	3.8372	3.8515	3.8665	3.8822	3.8985	3.9153	3.9328	3.9508	3.9694	3.9884	4.0079	4.0279	4.0483
2.4063	2.4804	2.5546	2.6291	2.7038	2.7782	2.8513	2.9219	2.9892	3.0523	3.1112	3.1662	3.2172	3.2646	3.3088	3.3507	3.3907	3.4294	3.4666	3.5019	3.5349	3.5653	3.5933	3.6189	3.6424	3.6639	3.6836	3.7016	3.7181	3.7333	3.7473	3.7606	3.7733	3.7856	3.7978	3.8103	3.8232	3.8368	3.8511	3.8661	3.8817	3.898	3.9149	3.9323	3.9503	3.9689	3.9879	4.0075	4.0274	4.0479
2.4062	2.4803	2.5545	2.629	2.7038	2.7782	2.8512	2.9219	2.9891	3.0522	3.1111	3.1659	3.2169	3.2643	3.3086	3.3504	3.3904	3.4291	3.4663	3.5016	3.5346	3.5651	3.5931	3.6187	3.6422	3.6637	3.6834	3.7014	3.7179	3.7331	3.7471	3.7604	3.773	3.7853	3.7975	3.81	3.8229	3.8364	3.8507	3.8657	3.8813	3.8976	3.9144	3.9319	3.9499	3.9684	3.9875	4.007	4.027	4.0474
2.4061	2.4802	2.5545	2.629	2.7038	2.7782	2.8512	2.9218	2.989	3.0521	3.1109	3.1657	3.2167	3.264	3.3083	3.3501	3.3902	3.4289	3.4661	3.5014	3.5344	3.5649	3.5929	3.6186	3.6421	3.6636	3.6832	3.7012	3.7177	3.7329	3.7469	3.7601	3.7727	3.785	3.7972	3.8097	3.8225	3.8361	3.8503	3.8653	3.8809	3.8971	3.914	3.9314	3.9494	3.968	3.987	4.0066	4.0266	4.047
2.4059	2.4801	2.5544	2.629	2.7038	2.7782	2.8512	2.9218	2.989	3.0519	3.1107	3.1655	3.2165	3.2638	3.308	3.3499	3.3899	3.4287	3.4659	3.5012	3.5343	3.5647	3.5927	3.6184	3.6419	3.6634	3.6831	3.7011	3.7175	3.7327	3.7467	3.7599	3.7725	3.7848	3.797	3.8094	3.8222	3.8357	3.85	3.8649	3.8805	3.8967	3.9135	3.931	3.949	3.9675	3.9866	4.0061	4.0262	4.0466
2.4058	2.48	2.5544	2.629	2.7038	2.7782	2.8512	2.9218	2.9889	3.0519	3.1106	3.1654	3.2163	3.2636	3.3078	3.3496	3.3897	3.4284	3.4657	3.501	3.5341	3.5646	3.5926	3.6182	3.6418	3.6633	3.6829	3.7009	3.7174	3.7325	3.7465	3.7597	3.7723	3.7845	3.7967	3.8091	3.8219	3.8354	3.8496	3.8645	3.8801	3.8963	3.9131	3.9306	3.9485	3.9671	3.9861	4.0057	4.0258	4.0462
2.4057	2.4799	2.5543	2.629	2.7039	2.7783	2.8512	2.9217	2.9889	3.0518	3.1105	3.1652	3.2161	3.2634	3.3076	3.3494	3.3895	3.4282	3.4655	3.5008	3.5339	3.5644	3.5924	3.6181	3.6416	3.6631	3.6828	3.7007	3.7172	3.7323	3.7463	3.7595	3.7721	3.7843	3.7964	3.8088	3.8216	3.8351	3.8493	3.8642	3.8797	3.8959	3.9127	3.9302	3.9481	3.9667	3.9857	4.0053	4.0254	4.0459
2.4055	2.4798	2.5543	2.629	2.7039	2.7783	2.8512	2.9218	2.9888	3.0517	3.1104	3.1651	3.2159	3.2632	3.3074	3.3492	3.3893	3.428	3.4653	3.5006	3.5337	3.5642	3.5923	3.6179	3.6415	3.663	3.6826	3.7006	3.717	3.7321	3.7461	3.7593	3.7718	3.7841	3.7962	3.8085	3.8213	3.8348	3.849	3.8638	3.8794	3.8956	3.9124	3.9298	3.9477	3.9663	3.9853	4.0049	4.025	4.0455
2.4054	2.4798	2.5543	2.629	2.7039	2.7783	2.8513	2.9218	2.9888	3.0517	3.1103	3.165	3.2158	3.263	3.3072	3.349	3.3891	3.4278	3.4651	3.5005	3.5336	3.5641	3.5921	3.6178	3.6413	3.6628	3.6825	3.7004	3.7169	3.732	3.746	3.7591	3.7716	3.7838	3.796	3.8083	3.821	3.8345	3.8487	3.8635	3.879	3.8952	3.912	3.9294	3.9474	3.9659	3.985	4.0045	4.0246	4.0452
2.4053	2.4797	2.5543	2.629	2.704	2.7784	2.8513	2.9218	2.9888	3.0516	3.1102	3.1649	3.2157	3.2629	3.3071	3.3489	3.3889	3.4277	3.4649	3.5003	3.5334	3.5639	3.592	3.6177	3.6412	3.6627	3.6823	3.7003	3.7167	3.7318	3.7458	3.7589	3.7714	3.7836	3.7957	3.808	3.8208	3.8342	3.8484	3.8632	3.8787	3.8949	3.9117	3.929	3.947	3.9655	3.9846	4.0042	4.0243	4.0448
2.4051	2.4796	2.5542	2.6291	2.704	2.7785	2.8514	2.9218	2.9888	3.0516	3.1102	3.1648	3.2156	3.2628	3.3069	3.3487	3.3888	3.4275	3.4648	3.5002	3.5333	3.5638	3.5918	3.6175	3.641	3.6625	3.6822	3.7001	3.7166	3.7316	3.7456	3.7587	3.7712	3.7834	3.7955	3.8078	3.8205	3.834	3.8481	3.8629	3.8784	3.8946	3.9113	3.9287	3.9467	3.9652	3.9843	4.0038	4.0239	4.0445
2.405	2.4796	2.5542	2.6291	2.7041	2.7785	2.8515	2.9219	2.9888	3.0516	3.1101	3.1647	3.2155	3.2626	3.3068	3.3486	3.3886	3.4274	3.4647	3.5	3.5331	3.5637	3.5917	3.6174	3.6409	3.6624	3.682	3.7	3.7164	3.7315	3.7455	3.7586	3.7711	3.7832	3.7953	3.8076	3.8203	3.8337	3.8478	3.8626	3.8781	3.8942	3.911	3.9284	3.9463	3.9648	3.9839	4.0035	4.0236	4.0442
2.4049	2.4795	2.5542	2.6291	2.7042	2.7786	2.8515	2.9219	2.9889	3.0516	3.1101	3.1647	3.2154	3.2625	3.3067	3.3485	3.3885	3.4273	3.4645	3.4999	3.533	3.5636	3.5916	3.6173	3.6408	3.6623	3.6819	3.6999	3.7163	3.7313	3.7453	3.7584	3.7709	3.783	3.7951	3.8074	3.8201	3.8335	3.8476	3.8624	3.8778	3.894	3.9107	3.9281	3.946	3.9645	3.9836	4.0032	4.0233	4.0439
2.4047	2.4794	2.5542	2.6292	2.7042	2.7787	2.8516	2.922	2.9889	3.0516	3.1101	3.1646	3.2153	3.2625	3.3066	3.3484	3.3884	3.4272	3.4644	3.4998	3.5329	3.5634	3.5915	3.6171	3.6407	3.6621	3.6818	3.6997	3.7161	3.7312	3.7451	3.7582	3.7707	3.7829	3.7949	3.8072	3.8199	3.8333	3.8474	3.8621	3.8776	3.8937	3.9104	3.9278	3.9457	3.9642	3.9833	4.0029	4.023	4.0436
2.4046	2.4794	2.5542	2.6292	2.7043	2.7788	2.8517	2.9221	2.989	3.0517	3.1101	3.1646	3.2153	3.2624	3.3065	3.3483	3.3883	3.4271	3.4643	3.4997	3.5328	3.5633	3.5913	3.617	3.6405	3.662	3.6816	3.6996	3.716	3.7311	3.745	3.7581	3.7706	3.7827	3.7947	3.807	3.8197	3.833	3.8471	3.8619	3.8773	3.8934	3.9101	3.9275	3.9454	3.9639	3.983	4.0026	4.0227	4.0434
2.4045	2.4793	2.5542	2.6293	2.7044	2.7789	2.8518	2.9222	2.9891	3.0517	3.1101	3.1646	3.2152	3.2624	3.3065	3.3482	3.3882	3.427	3.4642	3.4996	3.5327	3.5632	3.5912	3.6169	3.6404	3.6619	3.6815	3.6995	3.7159	3.7309	3.7449	3.7579	3.7704	3.7825	3.7946	3.8068	3.8195	3.8329	3.8469	3.8617	3.8771	3.8932	3.9099	3.9272	3.9451	3.9636	3.9827	4.0023	4.0225	4.0431
2.4043	2.4792	2.5542	2.6294	2.7045	2.7791	2.852	2.9223	2.9892	3.0518	3.1102	3.1646	3.2152	3.2623	3.3064	3.3482	3.3882	3.4269	3.4641	3.4995	3.5326	3.5631	3.5911	3.6168	3.6403	3.6618	3.6814	3.6993	3.7157	3.7308	3.7447	3.7578	3.7703	3.7824	3.7944	3.8066	3.8193	3.8327	3.8467	3.8615	3.8769	3.8929	3.9096	3.927	3.9449	3.9634	3.9825	4.0021	4.0222	4.0429
2.4042	2.4792	2.5543	2.6294	2.7046	2.7792	2.8521	2.9224	2.9893	3.0518	3.1102	3.1646	3.2152	3.2623	3.3064	3.3481	3.3881	3.4268	3.4641	3.4994	3.5325	3.563	3.591	3.6167	3.6402	3.6617	3.6813	3.6992	3.7156	3.7307	3.7446	3.7577	3.7701	3.7823	3.7943	3.8065	3.8192	3.8325	3.8465	3.8613	3.8767	3.8927	3.9094	3.9267	3.9446	3.9631	3.9822	4.0018	4.022	4.0426
2.4041	2.4791	2.5543	2.6295	2.7048	2.7793	2.8522	2.9226	2.9894	3.0519	3.1103	3.1647	3.2153	3.2623	3.3064	3.3481	3.3881	3.4268	3.464	3.4994	3.5324	3.5629	3.5909	3.6166	3.6401	3.6616	3.6812	3.6991	3.7155	3.7305	3.7445	3.7575	3.77	3.7821	3.7941	3.8064	3.819	3.8323	3.8464	3.8611	3.8765	3.8925	3.9092	3.9265	3.9444	3.9629	3.982	4.0016	4.0218	4.0424
2.404	2.4791	2.5543	2.6296	2.7049	2.7795	2.8524	2.9227	2.9895	3.052	3.1104	3.1647	3.2153	3.2623	3.3064	3.3481	3.3881	3.4268	3.464	3.4993	3.5324	3.5629	3.5909	3.6165	3.64	3.6615	3.6811	3.699	3.7154	3.7304	3.7444	3.7574	3.7699	3.782	3.794	3.8062	3.8189	3.8322	3.8462	3.8609	3.8763	3.8923	3.909	3.9263	3.9442	3.9627	3.9817	4.0014	4.0215	4.0422
2.4038	2.479	2.5543	2.6297	2.705	2.7796	2.8526	2.9229	2.9896	3.0522	3.1105	3.1648	3.2153	3.2624	3.3064	3.3481	3.388	3.4267	3.4639	3.4993	3.5323	3.5628	3.5908	3.6164	3.6399	3.6614	3.681	3.6989	3.7153	3.7303	3.7442	3.7573	3.7698	3.7819	3.7939	3.8061	3.8187	3.8321	3.8461	3.8608	3.8761	3.8922	3.9088	3.9261	3.944	3.9625	3.9815	4.0012	4.0213	4.042
2.4037	2.479	2.5544	2.6298	2.7052	2.7798	2.8527	2.9231	2.9898	3.0523	3.1106	3.1649	3.2154	3.2624	3.3064	3.3481	3.3881	3.4267	3.4639	3.4992	3.5323	3.5627	3.5907	3.6163	3.6398	3.6613	3.6809	3.6988	3.7152	3.7302	3.7441	3.7572	3.7697	3.7818	3.7938	3.806	3.8186	3.8319	3.8459	3.8606	3.876	3.892	3.9086	3.9259	3.9438	3.9623	3.9813	4.001	4.0211	4.0418
2.4036	2.4789	2.5544	2.6299	2.7053	2.78	2.8529	2.9232	2.99	3.0524	3.1107	3.165	3.2155	3.2625	3.3065	3.3481	3.3881	3.4267	3.4639	3.4992	3.5322	3.5627	3.5906	3.6163	3.6397	3.6612	3.6808	3.6987	3.7151	3.7301	3.744	3.7571	3.7696	3.7817	3.7937	3.8059	3.8185	3.8318	3.8458	3.8605	3.8758	3.8918	3.9085	3.9257	3.9436	3.9621	3.9811	4.0008	4.021	4.0417
2.4034	2.4789	2.5544	2.63	2.7055	2.7802	2.8531	2.9234	2.9901	3.0526	3.1108	3.1651	3.2156	3.2626	3.3065	3.3482	3.3881	3.4268	3.4639	3.4992	3.5322	3.5626	3.5906	3.6162	3.6396	3.6611	3.6807	3.6986	3.715	3.73	3.7439	3.757	3.7695	3.7816	3.7936	3.8058	3.8184	3.8317	3.8457	3.8604	3.8757	3.8917	3.9083	3.9256	3.9435	3.9619	3.981	4.0006	4.0208	4.0415
2.4033	2.4789	2.5545	2.6301	2.7056	2.7803	2.8533	2.9236	2.9903	3.0528	3.111	3.1652	3.2157	3.2627	3.3066	3.3483	3.3882	3.4268	3.4639	3.4992	3.5322	3.5626	3.5905	3.6161	3.6396	3.661	3.6806	3.6985	3.7149	3.7299	3.7438	3.7569	3.7694	3.7815	3.7935	3.8057	3.8184	3.8317	3.8456	3.8603	3.8756	3.8916	3.9082	3.9254	3.9433	3.9618	3.9808	4.0004	4.0206	4.0414
2.4032	2.4788	2.5545	2.6302	2.7058	2.7806	2.8535	2.9238	2.9905	3.053	3.1112	3.1654	3.2158	3.2628	3.3067	3.3483	3.3882	3.4268	3.4639	3.4992	3.5321	3.5625	3.5905	3.616	3.6395	3.6609	3.6805	3.6984	3.7148	3.7298	3.7438	3.7568	3.7693	3.7814	3.7935	3.8057	3.8183	3.8316	3.8456	3.8602	3.8755	3.8915	3.9081	3.9253	3.9432	3.9616	3.9807	4.0003	4.0205	4.0412
2.4031	2.4788	2.5546	2.6303	2.706	2.7808	2.8538	2.9241	2.9907	3.0531	3.1113	3.1656	3.216	3.2629	3.3068	3.3484	3.3883	3.4269	3.464	3.4992	3.5321	3.5625	3.5904	3.616	3.6394	3.6608	3.6804	3.6983	3.7147	3.7297	3.7437	3.7568	3.7692	3.7814	3.7934	3.8056	3.8182	3.8315	3.8455	3.8601	3.8754	3.8914	3.908	3.9252	3.943	3.9615	3.9805	4.0002	4.0204	4.0411
2.4029	2.4788	2.5546	2.6305	2.7062	2.781	2.854	2.9243	2.991	3.0534	3.1115	3.1657	3.2161	3.263	3.307	3.3485	3.3884	3.4269	3.464	3.4992	3.5321	3.5625	3.5904	3.6159	3.6393	3.6607	3.6803	3.6982	3.7146	3.7297	3.7436	3.7567	3.7692	3.7813	3.7934	3.8056	3.8182	3.8315	3.8454	3.8601	3.8754	3.8913	3.9079	3.9251	3.9429	3.9614	3.9804	4	4.0202	4.041
2.4028	2.4787	2.5547	2.6306	2.7064	2.7812	2.8542	2.9245	2.9912	3.0536	3.1117	3.1659	3.2163	3.2632	3.3071	3.3487	3.3885	3.427	3.4641	3.4992	3.5321	3.5624	3.5903	3.6159	3.6393	3.6607	3.6802	3.6981	3.7145	3.7296	3.7435	3.7566	3.7691	3.7813	3.7933	3.8055	3.8181	3.8314	3.8454	3.86	3.8753	3.8912	3.9078	3.925	3.9428	3.9613	3.9803	3.9999	4.0201	4.0409
2.4027	2.4787	2.5548	2.6308	2.7065	2.7814	2.8545	2.9248	2.9914	3.0538	3.112	3.1661	3.2165	3.2634	3.3073	3.3488	3.3886	3.4271	3.4641	3.4992	3.5321	3.5624	3.5903	3.6158	3.6392	3.6606	3.6802	3.6981	3.7144	3.7295	3.7435	3.7566	3.7691	3.7812	3.7933	3.8055	3.8181	3.8314	3.8454	3.86	3.8753	3.8912	3.9077	3.9249	3.9428	3.9612	3.9802	3.9998	4.02	4.0408
2.4025	2.4787	2.5548	2.6309	2.7068	2.7817	2.8547	2.925	2.9917	3.0541	3.1122	3.1663	3.2167	3.2635	3.3074	3.3489	3.3887	3.4272	3.4642	3.4993	3.5321	3.5624	3.5902	3.6158	3.6391	3.6605	3.6801	3.698	3.7144	3.7294	3.7434	3.7565	3.769	3.7812	3.7933	3.8055	3.8181	3.8314	3.8453	3.86	3.8752	3.8911	3.9077	3.9249	3.9427	3.9611	3.9801	3.9997	4.0199	4.0407
2.4024	2.4786	2.5549	2.6311	2.707	2.7819	2.855	2.9253	2.992	3.0543	3.1124	3.1666	3.2169	3.2637	3.3076	3.3491	3.3889	3.4273	3.4643	3.4993	3.5321	3.5624	3.5902	3.6157	3.6391	3.6605	3.68	3.6979	3.7143	3.7294	3.7434	3.7565	3.769	3.7812	3.7932	3.8055	3.8181	3.8314	3.8453	3.8599	3.8752	3.8911	3.9077	3.9248	3.9426	3.961	3.9801	3.9997	4.0199	4.0406
2.4023	2.4786	2.555	2.6312	2.7072	2.7822	2.8553	2.9256	2.9922	3.0546	3.1127	3.1668	3.2171	3.264	3.3078	3.3493	3.389	3.4274	3.4644	3.4994	3.5322	3.5624	3.5902	3.6157	3.639	3.6604	3.6799	3.6978	3.7142	3.7293	3.7433	3.7564	3.769	3.7812	3.7932	3.8055	3.8181	3.8314	3.8453	3.8599	3.8752	3.8911	3.9076	3.9248	3.9426	3.961	3.98	3.9996	4.0198	4.0406
2.4022	2.4786	2.555	2.6314	2.7074	2.7825	2.8556	2.9259	2.9925	3.0549	3.113	3.1671	3.2174	3.2642	3.308	3.3495	3.3892	3.4276	3.4645	3.4995	3.5322	3.5624	3.5902	3.6156	3.639	3.6603	3.6799	3.6978	3.7142	3.7293	3.7433	3.7564	3.769	3.7811	3.7932	3.8055	3.8181	3.8314	3.8453	3.8599	3.8752	3.8911	3.9076	3.9248	3.9426	3.9609	3.9799	3.9996	4.0198	4.0405
2.402	2.4786	2.5551	2.6315	2.7076	2.7827	2.8559	2.9262	2.9928	3.0552	3.1132	3.1673	3.2176	3.2644	3.3082	3.3497	3.3894	3.4277	3.4646	3.4995	3.5322	3.5624	3.5902	3.6156	3.6389	3.6603	3.6798	3.6977	3.7141	3.7292	3.7432	3.7564	3.7689	3.7811	3.7932	3.8055	3.8182	3.8314	3.8454	3.86	3.8752	3.8911	3.9076	3.9248	3.9425	3.9609	3.9799	3.9995	4.0197	4.0405
2.4019	2.4786	2.5552	2.6317	2.7079	2.783	2.8562	2.9265	2.9931	3.0555	3.1135	3.1676	3.2179	3.2647	3.3085	3.3499	3.3896	3.4279	3.4647	3.4996	3.5323	3.5624	3.5902	3.6156	3.6389	3.6602	3.6798	3.6977	3.7141	3.7292	3.7432	3.7564	3.7689	3.7811	3.7933	3.8055	3.8182	3.8315	3.8454	3.86	3.8752	3.8911	3.9076	3.9248	3.9425	3.9609	3.9799	3.9995	4.0197	4.0405
2.4018	2.4785	2.5553	2.6319	2.7081	2.7833	2.8565	2.9268	2.9935	3.0558	3.1139	3.1679	3.2182	3.265	3.3087	3.3501	3.3898	3.428	3.4648	3.4997	3.5323	3.5625	3.5902	3.6156	3.6388	3.6602	3.6797	3.6976	3.714	3.7291	3.7431	3.7563	3.7689	3.7812	3.7933	3.8056	3.8182	3.8315	3.8455	3.86	3.8753	3.8911	3.9076	3.9248	3.9425	3.9609	3.9799	3.9995	4.0197	4.0404
2.4017	2.4785	2.5554	2.6321	2.7084	2.7836	2.8568	2.9272	2.9938	3.0561	3.1142	3.1682	3.2185	3.2652	3.309	3.3504	3.39	3.4282	3.465	3.4998	3.5324	3.5625	3.5902	3.6155	3.6388	3.6601	3.6797	3.6975	3.714	3.7291	3.7431	3.7563	3.7689	3.7812	3.7933	3.8056	3.8183	3.8316	3.8455	3.8601	3.8753	3.8912	3.9077	3.9248	3.9425	3.9609	3.9799	3.9995	4.0197	4.0404
2.4015	2.4785	2.5555	2.6323	2.7086	2.7839	2.8572	2.9275	2.9941	3.0565	3.1145	3.1686	3.2188	3.2655	3.3093	3.3506	3.3902	3.4284	3.4651	3.4999	3.5325	3.5625	3.5902	3.6155	3.6388	3.6601	3.6796	3.6975	3.7139	3.729	3.7431	3.7563	3.7689	3.7812	3.7934	3.8057	3.8184	3.8317	3.8456	3.8602	3.8754	3.8912	3.9077	3.9248	3.9426	3.9609	3.9799	3.9995	4.0197	4.0404
2.4014	2.4785	2.5556	2.6325	2.7089	2.7842	2.8575	2.9279	2.9945	3.0568	3.1149	3.1689	3.2191	3.2658	3.3096	3.3509	3.3904	3.4286	3.4653	3.5	3.5325	3.5626	3.5902	3.6155	3.6387	3.66	3.6796	3.6974	3.7139	3.729	3.7431	3.7563	3.769	3.7812	3.7934	3.8057	3.8184	3.8317	3.8457	3.8603	3.8755	3.8913	3.9078	3.9249	3.9426	3.9609	3.9799	3.9995	4.0197	4.0404
2.4013	2.4785	2.5557	2.6327	2.7092	2.7845	2.8578	2.9282	2.9949	3.0572	3.1152	3.1692	3.2195	3.2662	3.3099	3.3512	3.3907	3.4288	3.4654	3.5001	3.5326	3.5626	3.5902	3.6155	3.6387	3.66	3.6795	3.6974	3.7138	3.729	3.7431	3.7563	3.769	3.7813	3.7935	3.8058	3.8185	3.8318	3.8458	3.8603	3.8756	3.8914	3.9079	3.9249	3.9427	3.961	3.9799	3.9995	4.0197	4.0405
2.4012	2.4785	2.5558	2.6329	2.7094	2.7849	2.8582	2.9286	2.9952	3.0575	3.1156	3.1696	3.2198	3.2665	3.3102	3.3515	3.3909	3.429	3.4656	3.5003	3.5327	3.5627	3.5902	3.6155	3.6387	3.66	3.6795	3.6974	3.7138	3.729	3.743	3.7563	3.769	3.7813	3.7935	3.8059	3.8186	3.8319	3.8459	3.8604	3.8757	3.8915	3.9079	3.925	3.9427	3.961	3.98	3.9995	4.0197	4.0405
2.401	2.4785	2.5559	2.6331	2.7097	2.7852	2.8586	2.929	2.9956	3.0579	3.116	3.17	3.2202	3.2668	3.3105	3.3518	3.3912	3.4293	3.4658	3.5004	3.5328	3.5627	3.5902	3.6155	3.6387	3.6599	3.6794	3.6973	3.7138	3.7289	3.743	3.7563	3.769	3.7814	3.7936	3.806	3.8187	3.832	3.846	3.8606	3.8758	3.8916	3.908	3.9251	3.9428	3.9611	3.98	3.9996	4.0198	4.0405
2.4009	2.4785	2.556	2.6333	2.71	2.7855	2.8589	2.9294	2.996	3.0583	3.1163	3.1704	3.2205	3.2672	3.3109	3.3521	3.3915	3.4295	3.466	3.5006	3.5329	3.5628	3.5903	3.6155	3.6387	3.6599	3.6794	3.6973	3.7137	3.7289	3.743	3.7564	3.7691	3.7814	3.7937	3.8061	3.8188	3.8322	3.8461	3.8607	3.8759	3.8917	3.9081	3.9252	3.9429	3.9612	3.9801	3.9996	4.0198	4.0406
2.4008	2.4785	2.5561	2.6335	2.7103	2.7859	2.8593	2.9298	2.9964	3.0587	3.1167	3.1707	3.2209	3.2676	3.3112	3.3524	3.3918	3.4298	3.4662	3.5007	3.533	3.5628	3.5903	3.6155	3.6386	3.6599	3.6794	3.6972	3.7137	3.7289	3.743	3.7564	3.7691	3.7815	3.7938	3.8062	3.8189	3.8323	3.8462	3.8608	3.876	3.8918	3.9082	3.9253	3.943	3.9613	3.9802	3.9997	4.0199	4.0406
2.4007	2.4785	2.5563	2.6337	2.7106	2.7862	2.8597	2.9302	2.9968	3.0591	3.1172	3.1712	3.2213	3.268	3.3116	3.3528	3.3921	3.43	3.4664	3.5009	3.5331	3.5629	3.5903	3.6155	3.6386	3.6599	3.6793	3.6972	3.7137	3.7289	3.7431	3.7564	3.7692	3.7816	3.7939	3.8063	3.8191	3.8324	3.8464	3.861	3.8761	3.8919	3.9084	3.9254	3.9431	3.9613	3.9803	3.9998	4.0199	4.0407
2.4005	2.4785	2.5564	2.6339	2.7109	2.7866	2.8601	2.9306	2.9973	3.0596	3.1176	3.1716	3.2217	3.2684	3.3119	3.3531	3.3924	3.4303	3.4666	3.501	3.5332	3.563	3.5904	3.6155	3.6386	3.6598	3.6793	3.6972	3.7137	3.7289	3.7431	3.7564	3.7692	3.7817	3.794	3.8064	3.8192	3.8326	3.8465	3.8611	3.8763	3.8921	3.9085	3.9255	3.9432	3.9614	3.9803	3.9999	4.02	4.0408
2.4004	2.4785	2.5565	2.6342	2.7112	2.787	2.8605	2.931	2.9977	3.06	3.118	3.172	3.2222	3.2688	3.3123	3.3535	3.3927	3.4306	3.4668	3.5012	3.5334	3.5631	3.5904	3.6155	3.6386	3.6598	3.6793	3.6972	3.7136	3.7289	3.7431	3.7565	3.7693	3.7818	3.7941	3.8065	3.8194	3.8327	3.8467	3.8613	3.8765	3.8923	3.9087	3.9257	3.9433	3.9616	3.9804	4	4.0201	4.0409
2.4003	2.4785	2.5566	2.6344	2.7115	2.7873	2.8609	2.9314	2.9981	3.0604	3.1185	3.1725	3.2226	3.2692	3.3127	3.3538	3.3931	3.4309	3.4671	3.5014	3.5335	3.5631	3.5904	3.6156	3.6386	3.6598	3.6793	3.6971	3.7136	3.7289	3.7431	3.7565	3.7694	3.7818	3.7942	3.8067	3.8195	3.8329	3.8469	3.8615	3.8766	3.8924	3.9088	3.9258	3.9434	3.9617	3.9806	4.0001	4.0202	4.041
2.4002	2.4785	2.5568	2.6347	2.7119	2.7877	2.8613	2.9319	2.9986	3.0609	3.1189	3.1729	3.223	3.2696	3.3132	3.3542	3.3934	3.4312	3.4673	3.5016	3.5336	3.5632	3.5905	3.6156	3.6386	3.6598	3.6792	3.6971	3.7136	3.7289	3.7431	3.7566	3.7694	3.7819	3.7943	3.8068	3.8197	3.8331	3.8471	3.8616	3.8768	3.8926	3.909	3.926	3.9436	3.9618	3.9807	4.0002	4.0203	4.0411
2.4	2.4785	2.5569	2.6349	2.7122	2.7881	2.8617	2.9323	2.999	3.0614	3.1194	3.1734	3.2235	3.2701	3.3136	3.3546	3.3938	3.4315	3.4676	3.5018	3.5338	3.5633	3.5906	3.6156	3.6386	3.6598	3.6792	3.6971	3.7136	3.7289	3.7432	3.7566	3.7695	3.7821	3.7945	3.807	3.8199	3.8333	3.8473	3.8618	3.877	3.8928	3.9092	3.9261	3.9437	3.962	3.9808	4.0003	4.0204	4.0412
2.3999	2.4785	2.557	2.6351	2.7125	2.7885	2.8622	2.9328	2.9995	3.0618	3.1199	3.1738	3.224	3.2705	3.314	3.355	3.3941	3.4318	3.4678	3.502	3.5339	3.5634	3.5906	3.6156	3.6386	3.6598	3.6792	3.6971	3.7136	3.7289	3.7432	3.7567	3.7696	3.7822	3.7946	3.8072	3.82	3.8335	3.8475	3.862	3.8772	3.893	3.9093	3.9263	3.9439	3.9621	3.981	4.0004	4.0206	4.0413
2.3998	2.4786	2.5572	2.6354	2.7129	2.7889	2.8626	2.9332	3	3.0623	3.1204	3.1743	3.2245	3.271	3.3145	3.3554	3.3945	3.4321	3.4681	3.5022	3.5341	3.5635	3.5907	3.6157	3.6386	3.6598	3.6792	3.6971	3.7136	3.7289	3.7432	3.7567	3.7697	3.7823	3.7948	3.8073	3.8202	3.8337	3.8477	3.8623	3.8774	3.8932	3.9095	3.9265	3.9441	3.9623	3.9811	4.0006	4.0207	4.0414
2.3997	2.4786	2.5573	2.6357	2.7132	2.7893	2.8631	2.9337	3.0005	3.0628	3.1209	3.1748	3.2249	3.2715	3.3149	3.3559	3.3949	3.4325	3.4684	3.5024	3.5342	3.5636	3.5907	3.6157	3.6386	3.6597	3.6792	3.6971	3.7136	3.7289	3.7433	3.7568	3.7698	3.7824	3.7949	3.8075	3.8204	3.8339	3.8479	3.8625	3.8776	3.8934	3.9098	3.9267	3.9443	3.9625	3.9813	4.0007	4.0208	4.0416
2.3995	2.4786	2.5575	2.6359	2.7136	2.7897	2.8635	2.9342	3.001	3.0633	3.1214	3.1753	3.2254	3.272	3.3154	3.3563	3.3953	3.4328	3.4687	3.5026	3.5344	3.5637	3.5908	3.6157	3.6387	3.6597	3.6792	3.6971	3.7136	3.7289	3.7433	3.7569	3.7699	3.7825	3.7951	3.8077	3.8206	3.8341	3.8481	3.8627	3.8779	3.8936	3.91	3.9269	3.9445	3.9627	3.9815	4.0009	4.021	4.0417
2.3994	2.4786	2.5576	2.6362	2.7139	2.7901	2.864	2.9347	3.0015	3.0638	3.1219	3.1759	3.226	3.2725	3.3159	3.3568	3.3957	3.4332	3.469	3.5028	3.5345	3.5639	3.5909	3.6158	3.6387	3.6597	3.6792	3.6971	3.7136	3.729	3.7433	3.7569	3.77	3.7827	3.7952	3.8079	3.8209	3.8343	3.8484	3.863	3.8781	3.8939	3.9102	3.9271	3.9447	3.9628	3.9816	4.0011	4.0212	4.0419
2.3993	2.4786	2.5578	2.6365	2.7143	2.7906	2.8645	2.9352	3.002	3.0644	3.1224	3.1764	3.2265	3.273	3.3164	3.3572	3.3961	3.4335	3.4693	3.5031	3.5347	3.564	3.591	3.6158	3.6387	3.6598	3.6792	3.6971	3.7136	3.729	3.7434	3.757	3.7701	3.7828	3.7954	3.8081	3.8211	3.8346	3.8486	3.8632	3.8784	3.8941	3.9104	3.9274	3.9449	3.963	3.9818	4.0013	4.0213	4.042
2.3992	2.4786	2.5579	2.6367	2.7146	2.791	2.8649	2.9357	3.0025	3.0649	3.123	3.1769	3.227	3.2735	3.3169	3.3577	3.3966	3.4339	3.4696	3.5033	3.5349	3.5641	3.591	3.6159	3.6387	3.6598	3.6792	3.6971	3.7136	3.729	3.7435	3.7571	3.7702	3.783	3.7956	3.8083	3.8213	3.8348	3.8489	3.8635	3.8786	3.8944	3.9107	3.9276	3.9451	3.9633	3.982	4.0014	4.0215	4.0422
2.399	2.4787	2.5581	2.637	2.715	2.7914	2.8654	2.9362	3.003	3.0654	3.1235	3.1775	3.2276	3.274	3.3174	3.3582	3.397	3.4343	3.4699	3.5036	3.5351	3.5642	3.5911	3.6159	3.6387	3.6598	3.6792	3.6971	3.7136	3.7291	3.7435	3.7572	3.7703	3.7831	3.7958	3.8085	3.8216	3.8351	3.8491	3.8637	3.8789	3.8946	3.9109	3.9278	3.9454	3.9635	3.9822	4.0016	4.0217	4.0424
2.3989	2.4787	2.5583	2.6373	2.7154	2.7919	2.8659	2.9367	3.0036	3.066	3.1241	3.178	3.2281	3.2746	3.3179	3.3587	3.3974	3.4347	3.4702	3.5038	3.5353	3.5644	3.5912	3.616	3.6388	3.6598	3.6792	3.6971	3.7137	3.7291	3.7436	3.7573	3.7705	3.7833	3.796	3.8087	3.8218	3.8353	3.8494	3.864	3.8792	3.8949	3.9112	3.9281	3.9456	3.9637	3.9825	4.0018	4.0219	4.0426
2.3988	2.4787	2.5584	2.6376	2.7158	2.7923	2.8664	2.9372	3.0041	3.0665	3.1246	3.1786	3.2287	3.2751	3.3184	3.3592	3.3979	3.4351	3.4705	3.5041	3.5355	3.5645	3.5913	3.616	3.6388	3.6598	3.6792	3.6971	3.7137	3.7291	3.7436	3.7574	3.7706	3.7834	3.7962	3.809	3.8221	3.8356	3.8497	3.8643	3.8795	3.8952	3.9115	3.9284	3.9459	3.964	3.9827	4.0021	4.0221	4.0428
2.3987	2.4787	2.5586	2.6379	2.7162	2.7928	2.8669	2.9377	3.0047	3.0671	3.1252	3.1792	3.2293	3.2757	3.319	3.3597	3.3984	3.4355	3.4709	3.5043	3.5357	3.5646	3.5914	3.6161	3.6388	3.6598	3.6792	3.6971	3.7137	3.7292	3.7437	3.7575	3.7707	3.7836	3.7964	3.8092	3.8223	3.8359	3.85	3.8646	3.8798	3.8955	3.9118	3.9286	3.9461	3.9642	3.9829	4.0023	4.0223	4.043
2.3986	2.4788	2.5588	2.6382	2.7165	2.7932	2.8674	2.9383	3.0052	3.0677	3.1258	3.1798	3.2299	3.2763	3.3195	3.3602	3.3988	3.4359	3.4712	3.5046	3.5359	3.5648	3.5915	3.6161	3.6389	3.6598	3.6792	3.6971	3.7137	3.7292	3.7438	3.7576	3.7709	3.7838	3.7966	3.8094	3.8226	3.8362	3.8503	3.8649	3.8801	3.8958	3.9121	3.9289	3.9464	3.9645	3.9832	4.0025	4.0225	4.0432
2.3984	2.4788	2.5589	2.6384	2.7169	2.7937	2.8679	2.9388	3.0058	3.0683	3.1264	3.1804	3.2304	3.2769	3.3201	3.3607	3.3993	3.4363	3.4716	3.5049	3.5361	3.5649	3.5916	3.6162	3.6389	3.6598	3.6792	3.6971	3.7137	3.7293	3.7438	3.7577	3.771	3.784	3.7968	3.8097	3.8229	3.8365	3.8506	3.8652	3.8804	3.8961	3.9124	3.9292	3.9467	3.9647	3.9834	4.0028	4.0228	4.0434
2.3983	2.4788	2.5591	2.6388	2.7173	2.7942	2.8684	2.9394	3.0064	3.0689	3.127	3.181	3.2311	3.2774	3.3207	3.3613	3.3998	3.4367	3.4719	3.5052	3.5363	3.5651	3.5917	3.6163	3.6389	3.6599	3.6792	3.6971	3.7138	3.7293	3.7439	3.7578	3.7712	3.7842	3.797	3.81	3.8231	3.8368	3.8509	3.8655	3.8807	3.8964	3.9127	3.9295	3.947	3.965	3.9837	4.003	4.023	4.0436
2.3982	2.4789	2.5593	2.6391	2.7177	2.7946	2.869	2.9399	3.0069	3.0695	3.1276	3.1816	3.2317	3.278	3.3212	3.3618	3.4003	3.4372	3.4723	3.5055	3.5365	3.5652	3.5918	3.6163	3.639	3.6599	3.6792	3.6971	3.7138	3.7294	3.744	3.7579	3.7713	3.7844	3.7973	3.8102	3.8234	3.8371	3.8512	3.8659	3.881	3.8967	3.913	3.9298	3.9472	3.9653	3.9839	4.0033	4.0232	4.0439
2.3981	2.4789	2.5595	2.6394	2.7182	2.7951	2.8695	2.9405	3.0075	3.0701	3.1282	3.1822	3.2323	3.2787	3.3218	3.3624	3.4008	3.4376	3.4726	3.5058	3.5367	3.5654	3.5919	3.6164	3.639	3.6599	3.6792	3.6972	3.7138	3.7294	3.7441	3.758	3.7715	3.7846	3.7975	3.8105	3.8237	3.8374	3.8516	3.8662	3.8814	3.8971	3.9133	3.9301	3.9476	3.9656	3.9842	4.0035	4.0235	4.0441
2.398	2.4789	2.5596	2.6397	2.7186	2.7956	2.87	2.9411	3.0081	3.0707	3.1289	3.1829	3.2329	3.2793	3.3224	3.3629	3.4013	3.4381	3.473	3.506	3.5369	3.5656	3.592	3.6165	3.6391	3.6599	3.6793	3.6972	3.7139	3.7295	3.7442	3.7582	3.7716	3.7848	3.7977	3.8108	3.824	3.8377	3.8519	3.8666	3.8817	3.8974	3.9137	3.9305	3.9479	3.9659	3.9845	4.0038	4.0237	4.0444
2.3978	2.479	2.5598	2.64	2.719	2.7961	2.8706	2.9417	3.0087	3.0713	3.1295	3.1835	3.2336	3.2799	3.323	3.3635	3.4019	3.4385	3.4734	3.5064	3.5372	3.5657	3.5921	3.6166	3.6391	3.66	3.6793	3.6972	3.7139	3.7295	3.7443	3.7583	3.7718	3.785	3.798	3.811	3.8243	3.8381	3.8522	3.8669	3.8821	3.8978	3.914	3.9308	3.9482	3.9662	3.9848	4.0041	4.024	4.0446
2.3977	2.479	2.56	2.6403	2.7194	2.7966	2.8711	2.9423	3.0093	3.0719	3.1301	3.1842	3.2342	3.2806	3.3237	3.3641	3.4024	3.439	3.4738	3.5067	3.5374	3.5659	3.5923	3.6166	3.6392	3.66	3.6793	3.6972	3.7139	3.7296	3.7444	3.7584	3.772	3.7852	3.7982	3.8113	3.8247	3.8384	3.8526	3.8673	3.8824	3.8981	3.9144	3.9311	3.9485	3.9665	3.9851	4.0044	4.0243	4.0449
2.3976	2.479	2.5602	2.6406	2.7198	2.7971	2.8717	2.9428	3.01	3.0726	3.1308	3.1848	3.2349	3.2812	3.3243	3.3647	3.4029	3.4394	3.4742	3.507	3.5377	3.5661	3.5924	3.6167	3.6392	3.66	3.6793	3.6973	3.714	3.7297	3.7445	3.7586	3.7721	3.7854	3.7985	3.8116	3.825	3.8388	3.853	3.8676	3.8828	3.8985	3.9147	3.9315	3.9488	3.9668	3.9854	4.0046	4.0246	4.0451
2.3975	2.4791	2.5604	2.641	2.7203	2.7976	2.8722	2.9434	3.0106	3.0732	3.1315	3.1855	3.2355	3.2819	3.3249	3.3653	3.4035	3.4399	3.4746	3.5073	3.5379	3.5663	3.5925	3.6168	3.6393	3.6601	3.6794	3.6973	3.714	3.7297	3.7446	3.7587	3.7723	3.7856	3.7987	3.8119	3.8253	3.8391	3.8533	3.868	3.8832	3.8989	3.9151	3.9318	3.9492	3.9671	3.9857	4.0049	4.0248	4.0454
2.3974	2.4791	2.5606	2.6413	2.7207	2.7981	2.8728	2.944	3.0112	3.0739	3.1321	3.1862	3.2362	3.2825	3.3256	3.3659	3.404	3.4404	3.475	3.5076	3.5381	3.5664	3.5926	3.6169	3.6393	3.6601	3.6794	3.6973	3.7141	3.7298	3.7447	3.7588	3.7725	3.7858	3.799	3.8122	3.8257	3.8395	3.8537	3.8684	3.8836	3.8992	3.9155	3.9322	3.9495	3.9675	3.986	4.0052	4.0251	4.0457
2.3972	2.4792	2.5608	2.6416	2.7211	2.7986	2.8734	2.9447	3.0119	3.0745	3.1328	3.1869	3.2369	3.2832	3.3262	3.3665	3.4046	3.4409	3.4754	3.508	3.5384	3.5666	3.5928	3.617	3.6394	3.6601	3.6794	3.6974	3.7141	3.7299	3.7448	3.759	3.7727	3.7861	3.7993	3.8125	3.826	3.8398	3.8541	3.8688	3.884	3.8996	3.9158	3.9326	3.9499	3.9678	3.9864	4.0056	4.0254	4.046
2.3971	2.4792	2.561	2.6419	2.7216	2.7992	2.874	2.9453	3.0125	3.0752	3.1335	3.1876	3.2376	3.2839	3.3269	3.3671	3.4052	3.4414	3.4758	3.5083	3.5387	3.5668	3.5929	3.6171	3.6394	3.6602	3.6794	3.6974	3.7142	3.73	3.7449	3.7591	3.7729	3.7863	3.7996	3.8129	3.8263	3.8402	3.8545	3.8692	3.8844	3.9	3.9162	3.933	3.9503	3.9682	3.9867	4.0059	4.0257	4.0463
2.397	2.4793	2.5612	2.6423	2.722	2.7997	2.8745	2.9459	3.0132	3.0759	3.1342	3.1883	3.2383	3.2846	3.3276	3.3678	3.4057	3.4419	3.4763	3.5086	3.5389	3.567	3.593	3.6172	3.6395	3.6602	3.6795	3.6974	3.7142	3.73	3.745	3.7593	3.7731	3.7865	3.7998	3.8132	3.8267	3.8406	3.8549	3.8696	3.8848	3.9004	3.9166	3.9333	3.9506	3.9685	3.987	4.0062	4.026	4.0466
2.3969	2.4793	2.5614	2.6426	2.7225	2.8002	2.8751	2.9465	3.0138	3.0766	3.1349	3.189	3.239	3.2853	3.3282	3.3684	3.4063	3.4424	3.4767	3.509	3.5392	3.5672	3.5932	3.6172	3.6396	3.6603	3.6795	3.6975	3.7143	3.7301	3.7451	3.7594	3.7733	3.7868	3.8001	3.8135	3.8271	3.841	3.8553	3.87	3.8852	3.9009	3.917	3.9337	3.951	3.9689	3.9874	4.0065	4.0264	4.0469
2.3968	2.4793	2.5616	2.643	2.7229	2.8008	2.8757	2.9472	3.0145	3.0773	3.1356	3.1897	3.2397	3.286	3.3289	3.3691	3.4069	3.4429	3.4771	3.5093	3.5394	3.5674	3.5933	3.6173	3.6396	3.6603	3.6796	3.6975	3.7143	3.7302	3.7452	3.7596	3.7735	3.787	3.8004	3.8138	3.8274	3.8414	3.8557	3.8704	3.8856	3.9013	3.9174	3.9341	3.9514	3.9693	3.9877	4.0069	4.0267	4.0472
2.3966	2.4794	2.5618	2.6433	2.7234	2.8013	2.8763	2.9478	3.0151	3.0779	3.1363	3.1904	3.2405	3.2867	3.3296	3.3697	3.4075	3.4435	3.4776	3.5097	3.5397	3.5676	3.5935	3.6174	3.6397	3.6604	3.6796	3.6976	3.7144	3.7303	3.7453	3.7598	3.7737	3.7873	3.8007	3.8142	3.8278	3.8418	3.8561	3.8708	3.886	3.9017	3.9179	3.9346	3.9518	3.9696	3.9881	4.0072	4.027	4.0475
2.3965	2.4794	2.562	2.6437	2.7238	2.8018	2.8769	2.9484	3.0158	3.0786	3.137	3.1911	3.2412	3.2874	3.3303	3.3704	3.4081	3.444	3.478	3.51	3.54	3.5678	3.5936	3.6175	3.6398	3.6604	3.6796	3.6976	3.7145	3.7304	3.7455	3.7599	3.7739	3.7875	3.801	3.8145	3.8282	3.8422	3.8565	3.8713	3.8865	3.9021	3.9183	3.935	3.9522	3.97	3.9885	4.0076	4.0274	4.0478
2.3964	2.4795	2.5622	2.644	2.7243	2.8024	2.8775	2.9491	3.0165	3.0794	3.1377	3.1919	3.2419	3.2882	3.331	3.371	3.4087	3.4445	3.4785	3.5104	3.5403	3.568	3.5938	3.6177	3.6398	3.6605	3.6797	3.6977	3.7145	3.7305	3.7456	3.7601	3.7741	3.7878	3.8013	3.8149	3.8286	3.8426	3.8569	3.8717	3.8869	3.9026	3.9187	3.9354	3.9526	3.9704	3.9889	4.0079	4.0277	4.0482
2.3963	2.4795	2.5624	2.6444	2.7248	2.8029	2.8781	2.9497	3.0172	3.0801	3.1385	3.1926	3.2427	3.2889	3.3317	3.3717	3.4094	3.4451	3.4789	3.5108	3.5406	3.5682	3.5939	3.6178	3.6399	3.6605	3.6797	3.6977	3.7146	3.7305	3.7457	3.7603	3.7743	3.7881	3.8016	3.8152	3.829	3.843	3.8574	3.8722	3.8874	3.903	3.9192	3.9358	3.953	3.9708	3.9892	4.0083	4.028	4.0485
2.3962	2.4796	2.5626	2.6447	2.7252	2.8035	2.8788	2.9504	3.0179	3.0808	3.1392	3.1934	3.2434	3.2896	3.3325	3.3724	3.41	3.4456	3.4794	3.5111	3.5408	3.5684	3.5941	3.6179	3.64	3.6606	3.6798	3.6977	3.7147	3.7306	3.7458	3.7604	3.7745	3.7883	3.802	3.8156	3.8293	3.8434	3.8578	3.8726	3.8878	3.9035	3.9196	3.9362	3.9534	3.9712	3.9896	4.0087	4.0284	4.0488
2.396	2.4796	2.5629	2.6451	2.7257	2.804	2.8794	2.9511	3.0186	3.0815	3.14	3.1941	3.2442	3.2904	3.3332	3.3731	3.4106	3.4462	3.4798	3.5115	3.5411	3.5687	3.5942	3.618	3.6401	3.6606	3.6798	3.6978	3.7147	3.7307	3.746	3.7606	3.7748	3.7886	3.8023	3.8159	3.8297	3.8438	3.8583	3.8731	3.8883	3.9039	3.9201	3.9367	3.9539	3.9716	3.99	4.009	4.0288	4.0492
2.3959	2.4797	2.5631	2.6455	2.7262	2.8046	2.88	2.9517	3.0193	3.0822	3.1407	3.1949	3.245	3.2912	3.3339	3.3738	3.4112	3.4468	3.4803	3.5119	3.5414	3.5689	3.5944	3.6181	3.6401	3.6607	3.6799	3.6979	3.7148	3.7308	3.7461	3.7608	3.775	3.7889	3.8026	3.8163	3.8301	3.8443	3.8587	3.8735	3.8887	3.9044	3.9205	3.9371	3.9543	3.9721	3.9904	4.0094	4.0291	4.0495
2.3958	2.4798	2.5633	2.6458	2.7267	2.8052	2.8806	2.9524	3.02	3.083	3.1415	3.1957	3.2457	3.2919	3.3347	3.3745	3.4119	3.4473	3.4808	3.5123	3.5417	3.5691	3.5945	3.6182	3.6402	3.6607	3.6799	3.6979	3.7149	3.7309	3.7463	3.761	3.7752	3.7892	3.8029	3.8167	3.8306	3.8447	3.8592	3.874	3.8892	3.9049	3.921	3.9376	3.9547	3.9725	3.9908	4.0098	4.0295	4.0499
2.3957	2.4798	2.5635	2.6462	2.7272	2.8057	2.8813	2.9531	3.0207	3.0837	3.1422	3.1965	3.2465	3.2927	3.3354	3.3752	3.4125	3.4479	3.4813	3.5127	3.542	3.5693	3.5947	3.6183	3.6403	3.6608	3.68	3.698	3.7149	3.731	3.7464	3.7612	3.7755	3.7894	3.8033	3.8171	3.831	3.8451	3.8596	3.8745	3.8897	3.9053	3.9214	3.938	3.9552	3.9729	3.9912	4.0102	4.0299	4.0502
2.3956	2.4799	2.5637	2.6466	2.7276	2.8063	2.8819	2.9538	3.0214	3.0845	3.143	3.1972	3.2473	3.2935	3.3362	3.3759	3.4132	3.4485	3.4818	3.5131	3.5423	3.5696	3.5949	3.6184	3.6404	3.6609	3.68	3.698	3.715	3.7311	3.7465	3.7613	3.7757	3.7897	3.8036	3.8174	3.8314	3.8456	3.8601	3.8749	3.8902	3.9058	3.9219	3.9385	3.9556	3.9733	3.9916	4.0106	4.0303	4.0506
2.3954	2.4799	2.564	2.6469	2.7281	2.8069	2.8826	2.9545	3.0222	3.0852	3.1438	3.198	3.2481	3.2943	3.3369	3.3766	3.4139	3.449	3.4823	3.5135	3.5426	3.5698	3.595	3.6186	3.6405	3.6609	3.6801	3.6981	3.7151	3.7312	3.7467	3.7615	3.7759	3.79	3.8039	3.8178	3.8318	3.846	3.8606	3.8754	3.8907	3.9063	3.9224	3.939	3.9561	3.9738	3.9921	4.011	4.0306	4.051
2.3953	2.48	2.5642	2.6473	2.7286	2.8075	2.8832	2.9552	3.0229	3.086	3.1446	3.1988	3.2489	3.295	3.3377	3.3774	3.4145	3.4496	3.4827	3.5139	3.5429	3.57	3.5952	3.6187	3.6405	3.661	3.6801	3.6981	3.7152	3.7313	3.7468	3.7617	3.7762	3.7903	3.8043	3.8182	3.8322	3.8465	3.8611	3.8759	3.8912	3.9068	3.9229	3.9395	3.9566	3.9742	3.9925	4.0114	4.031	4.0513
2.3952	2.48	2.5644	2.6477	2.7291	2.8081	2.8838	2.9559	3.0236	3.0868	3.1454	3.1996	3.2497	3.2958	3.3385	3.3781	3.4152	3.4502	3.4832	3.5143	3.5433	3.5703	3.5954	3.6188	3.6406	3.661	3.6802	3.6982	3.7152	3.7315	3.747	3.7619	3.7764	3.7906	3.8046	3.8186	3.8327	3.847	3.8615	3.8764	3.8917	3.9073	3.9234	3.9399	3.957	3.9747	3.9929	4.0118	4.0314	4.0517
2.3951	2.4801	2.5647	2.6481	2.7296	2.8087	2.8845	2.9566	3.0244	3.0875	3.1462	3.2004	3.2505	3.2967	3.3392	3.3788	3.4159	3.4508	3.4837	3.5147	3.5436	3.5705	3.5956	3.6189	3.6407	3.6611	3.6802	3.6983	3.7153	3.7316	3.7471	3.7621	3.7767	3.7909	3.805	3.819	3.8331	3.8474	3.862	3.8769	3.8922	3.9078	3.9239	3.9404	3.9575	3.9751	3.9934	4.0122	4.0318	4.0521
2.395	2.4802	2.5649	2.6484	2.7301	2.8092	2.8852	2.9573	3.0251	3.0883	3.147	3.2013	3.2513	3.2975	3.34	3.3796	3.4166	3.4514	3.4843	3.5151	3.5439	3.5707	3.5957	3.619	3.6408	3.6612	3.6803	3.6983	3.7154	3.7317	3.7473	3.7623	3.7769	3.7912	3.8053	3.8194	3.8336	3.8479	3.8625	3.8774	3.8927	3.9083	3.9244	3.9409	3.958	3.9756	3.9938	4.0127	4.0322	4.0525
2.3949	2.4802	2.5651	2.6488	2.7306	2.8098	2.8858	2.958	3.0258	3.0891	3.1478	3.2021	3.2522	3.2983	3.3408	3.3803	3.4172	3.452	3.4848	3.5155	3.5442	3.571	3.5959	3.6192	3.6409	3.6613	3.6804	3.6984	3.7155	3.7318	3.7474	3.7625	3.7772	3.7915	3.8057	3.8198	3.834	3.8484	3.863	3.8779	3.8932	3.9088	3.9249	3.9414	3.9585	3.9761	3.9943	4.0131	4.0326	4.0529
2.3947	2.4803	2.5654	2.6492	2.7311	2.8104	2.8865	2.9587	3.0266	3.0899	3.1486	3.2029	3.253	3.2991	3.3416	3.3811	3.4179	3.4526	3.4853	3.5159	3.5445	3.5712	3.5961	3.6193	3.641	3.6613	3.6804	3.6985	3.7156	3.7319	3.7476	3.7627	3.7774	3.7918	3.806	3.8202	3.8344	3.8489	3.8635	3.8784	3.8937	3.9093	3.9254	3.9419	3.9589	3.9765	3.9947	4.0135	4.033	4.0533
2.3946	2.4804	2.5656	2.6496	2.7316	2.811	2.8872	2.9594	3.0274	3.0907	3.1494	3.2037	3.2538	3.2999	3.3424	3.3818	3.4186	3.4533	3.4858	3.5163	3.5449	3.5715	3.5963	3.6194	3.6411	3.6614	3.6805	3.6985	3.7157	3.732	3.7477	3.7629	3.7777	3.7921	3.8064	3.8206	3.8349	3.8493	3.864	3.879	3.8942	3.9099	3.9259	3.9424	3.9594	3.977	3.9952	4.014	4.0335	4.0537
2.3945	2.4804	2.5658	2.65	2.7322	2.8116	2.8878	2.9601	3.0281	3.0914	3.1502	3.2046	3.2547	3.3008	3.3432	3.3826	3.4193	3.4539	3.4863	3.5167	3.5452	3.5717	3.5965	3.6196	3.6412	3.6615	3.6806	3.6986	3.7157	3.7321	3.7479	3.7631	3.7779	3.7925	3.8068	3.821	3.8354	3.8498	3.8645	3.8795	3.8948	3.9104	3.9264	3.9429	3.9599	3.9775	3.9956	4.0144	4.0339	4.0541
2.3944	2.4805	2.5661	2.6504	2.7327	2.8123	2.8885	2.9609	3.0289	3.0922	3.151	3.2054	3.2555	3.3016	3.344	3.3834	3.42	3.4545	3.4869	3.5172	3.5455	3.572	3.5966	3.6197	3.6413	3.6615	3.6806	3.6987	3.7158	3.7323	3.7481	3.7633	3.7782	3.7928	3.8072	3.8215	3.8358	3.8503	3.865	3.88	3.8953	3.9109	3.927	3.9434	3.9604	3.978	3.9961	4.0149	4.0343	4.0545
2.3943	2.4806	2.5663	2.6508	2.7332	2.8129	2.8892	2.9616	3.0296	3.093	3.1519	3.2063	3.2564	3.3024	3.3449	3.3841	3.4208	3.4551	3.4874	3.5176	3.5459	3.5722	3.5968	3.6198	3.6414	3.6616	3.6807	3.6987	3.7159	3.7324	3.7482	3.7635	3.7785	3.7931	3.8075	3.8219	3.8363	3.8508	3.8656	3.8805	3.8958	3.9115	3.9275	3.944	3.9609	3.9784	3.9966	4.0153	4.0347	4.0549
2.3941	2.4806	2.5666	2.6512	2.7337	2.8135	2.8899	2.9623	3.0304	3.0939	3.1527	3.2071	3.2572	3.3033	3.3457	3.3849	3.4215	3.4558	3.4879	3.518	3.5462	3.5725	3.597	3.62	3.6415	3.6617	3.6808	3.6988	3.716	3.7325	3.7484	3.7638	3.7787	3.7934	3.8079	3.8223	3.8368	3.8513	3.8661	3.8811	3.8964	3.912	3.928	3.9445	3.9614	3.9789	3.997	4.0158	4.0352	4.0553
2.394	2.4807	2.5668	2.6516	2.7342	2.8141	2.8905	2.9631	3.0312	3.0947	3.1535	3.208	3.2581	3.3041	3.3465	3.3857	3.4222	3.4564	3.4885	3.5185	3.5465	3.5727	3.5972	3.6201	3.6416	3.6618	3.6808	3.6989	3.7161	3.7326	3.7485	3.764	3.779	3.7937	3.8083	3.8227	3.8372	3.8518	3.8666	3.8816	3.8969	3.9125	3.9286	3.945	3.962	3.9794	3.9975	4.0162	4.0356	4.0557
2.3939	2.4808	2.567	2.652	2.7347	2.8147	2.8912	2.9638	3.032	3.0955	3.1544	3.2088	3.259	3.305	3.3473	3.3865	3.4229	3.457	3.489	3.5189	3.5469	3.573	3.5974	3.6202	3.6417	3.6618	3.6809	3.699	3.7162	3.7328	3.7487	3.7642	3.7793	3.7941	3.8087	3.8232	3.8377	3.8523	3.8671	3.8822	3.8975	3.9131	3.9291	3.9455	3.9625	3.9799	3.998	4.0167	4.0361	4.0562
2.3938	2.4808	2.5673	2.6524	2.7353	2.8153	2.8919	2.9645	3.0328	3.0963	3.1552	3.2097	3.2598	3.3058	3.3482	3.3873	3.4236	3.4577	3.4895	3.5193	3.5472	3.5732	3.5976	3.6204	3.6418	3.6619	3.681	3.699	3.7163	3.7329	3.7489	3.7644	3.7796	3.7944	3.809	3.8236	3.8382	3.8528	3.8677	3.8827	3.898	3.9137	3.9297	3.9461	3.963	3.9804	3.9985	4.0171	4.0365	4.0566
2.3937	2.4809	2.5675	2.6528	2.7358	2.8159	2.8926	2.9653	3.0335	3.0971	3.1561	3.2105	3.2607	3.3067	3.349	3.3881	3.4244	3.4583	3.4901	3.5198	3.5476	3.5735	3.5978	3.6205	3.6419	3.662	3.681	3.6991	3.7164	3.733	3.7491	3.7646	3.7798	3.7947	3.8094	3.824	3.8387	3.8534	3.8682	3.8833	3.8986	3.9142	3.9302	3.9466	3.9635	3.9809	3.999	4.0176	4.0369	4.057
2.3936	2.481	2.5678	2.6532	2.7363	2.8166	2.8933	2.966	3.0343	3.0979	3.1569	3.2114	3.2616	3.3076	3.3499	3.3889	3.4251	3.459	3.4906	3.5202	3.5479	3.5738	3.598	3.6207	3.642	3.6621	3.6811	3.6992	3.7165	3.7331	3.7492	3.7649	3.7801	3.7951	3.8098	3.8245	3.8391	3.8539	3.8688	3.8838	3.8991	3.9148	3.9308	3.9472	3.964	3.9815	3.9994	4.0181	4.0374	4.0574
2.3934	2.481	2.568	2.6536	2.7369	2.8172	2.894	2.9668	3.0351	3.0988	3.1578	3.2123	3.2625	3.3085	3.3507	3.3897	3.4258	3.4596	3.4912	3.5207	3.5483	3.574	3.5982	3.6208	3.6421	3.6622	3.6812	3.6993	3.7166	3.7333	3.7494	3.7651	3.7804	3.7954	3.8102	3.8249	3.8396	3.8544	3.8693	3.8844	3.8997	3.9153	3.9313	3.9477	3.9646	3.982	3.9999	4.0186	4.0379	4.0579
2.3933	2.4811	2.5683	2.654	2.7374	2.8178	2.8947	2.9675	3.0359	3.0996	3.1586	3.2132	3.2633	3.3093	3.3516	3.3905	3.4266	3.4603	3.4917	3.5211	3.5486	3.5743	3.5984	3.621	3.6422	3.6623	3.6813	3.6993	3.7167	3.7334	3.7496	3.7653	3.7807	3.7957	3.8106	3.8254	3.8401	3.8549	3.8698	3.8849	3.9003	3.9159	3.9319	3.9483	3.9651	3.9825	4.0004	4.019	4.0383	4.0583
2.3932	2.4812	2.5685	2.6544	2.7379	2.8185	2.8954	2.9683	3.0367	3.1004	3.1595	3.2141	3.2642	3.3102	3.3524	3.3913	3.4273	3.4609	3.4923	3.5216	3.549	3.5746	3.5986	3.6211	3.6423	3.6623	3.6813	3.6994	3.7168	3.7335	3.7498	3.7655	3.7809	3.7961	3.811	3.8258	3.8406	3.8554	3.8704	3.8855	3.9008	3.9165	3.9324	3.9488	3.9657	3.983	4.0009	4.0195	4.0388	4.0588
2.3931	2.4812	2.5688	2.6548	2.7385	2.8191	2.8961	2.969	3.0375	3.1013	3.1604	3.2149	3.2651	3.3111	3.3533	3.3921	3.4281	3.4616	3.4928	3.522	3.5493	3.5748	3.5988	3.6212	3.6424	3.6624	3.6814	3.6995	3.7169	3.7337	3.7499	3.7658	3.7812	3.7964	3.8114	3.8263	3.8411	3.856	3.8709	3.8861	3.9014	3.917	3.933	3.9494	3.9662	3.9835	4.0014	4.02	4.0392	4.0592
2.393	2.4813	2.569	2.6552	2.739	2.8197	2.8968	2.9698	3.0383	3.1021	3.1612	3.2158	3.266	3.312	3.3541	3.3929	3.4288	3.4623	3.4934	3.5225	3.5497	3.5751	3.599	3.6214	3.6425	3.6625	3.6815	3.6996	3.717	3.7338	3.7501	3.766	3.7815	3.7968	3.8118	3.8267	3.8416	3.8565	3.8715	3.8866	3.902	3.9176	3.9336	3.9499	3.9667	3.9841	4.002	4.0205	4.0397	4.0596
2.3929	2.4814	2.5693	2.6556	2.7395	2.8204	2.8975	2.9706	3.0391	3.103	3.1621	3.2167	3.2669	3.3129	3.355	3.3938	3.4296	3.4629	3.494	3.5229	3.55	3.5754	3.5992	3.6215	3.6426	3.6626	3.6816	3.6997	3.7171	3.7339	3.7503	3.7662	3.7818	3.7971	3.8122	3.8272	3.8421	3.857	3.8721	3.8872	3.9026	3.9182	3.9342	3.9505	3.9673	3.9846	4.0025	4.021	4.0402	4.0601
2.3927	2.4815	2.5695	2.656	2.7401	2.821	2.8982	2.9713	3.0399	3.1038	3.163	3.2176	3.2678	3.3138	3.3559	3.3946	3.4303	3.4636	3.4945	3.5234	3.5504	3.5757	3.5994	3.6217	3.6427	3.6627	3.6816	3.6998	3.7172	3.7341	3.7505	3.7665	3.7821	3.7975	3.8126	3.8276	3.8426	3.8576	3.8726	3.8878	3.9032	3.9188	3.9347	3.9511	3.9678	3.9851	4.003	4.0215	4.0406	4.0605
2.3926	2.4815	2.5698	2.6565	2.7406	2.8216	2.899	2.9721	3.0408	3.1047	3.1639	3.2185	3.2687	3.3147	3.3567	3.3954	3.4311	3.4643	3.4951	3.5239	3.5507	3.5759	3.5996	3.6218	3.6429	3.6628	3.6817	3.6998	3.7173	3.7342	3.7506	3.7667	3.7824	3.7978	3.813	3.8281	3.8431	3.8581	3.8732	3.8884	3.9038	3.9194	3.9353	3.9516	3.9684	3.9857	4.0035	4.022	4.0411	4.061
2.3925	2.4816	2.57	2.6569	2.7412	2.8223	2.8997	2.9729	3.0416	3.1055	3.1647	3.2194	3.2696	3.3156	3.3576	3.3962	3.4319	3.4649	3.4957	3.5243	3.5511	3.5762	3.5998	3.622	3.643	3.6629	3.6818	3.6999	3.7174	3.7343	3.7508	3.7669	3.7827	3.7982	3.8134	3.8286	3.8436	3.8587	3.8738	3.889	3.9043	3.92	3.9359	3.9522	3.969	3.9862	4.004	4.0225	4.0416	4.0614
2.3924	2.4817	2.5703	2.6573	2.7417	2.8229	2.9004	2.9736	3.0424	3.1064	3.1656	3.2203	3.2705	3.3165	3.3585	3.3971	3.4326	3.4656	3.4963	3.5248	3.5515	3.5765	3.6	3.6221	3.6431	3.6629	3.6819	3.7	3.7175	3.7345	3.751	3.7672	3.783	3.7985	3.8139	3.829	3.8441	3.8592	3.8743	3.8895	3.9049	3.9206	3.9365	3.9528	3.9695	3.9867	4.0045	4.0229	4.0421	4.0619
2.3923	2.4818	2.5706	2.6577	2.7423	2.8236	2.9011	2.9744	3.0432	3.1072	3.1665	3.2212	3.2715	3.3174	3.3594	3.3979	3.4334	3.4663	3.4968	3.5253	3.5518	3.5768	3.6002	3.6223	3.6432	3.663	3.682	3.7001	3.7176	3.7346	3.7512	3.7674	3.7833	3.7989	3.8143	3.8295	3.8446	3.8598	3.8749	3.8901	3.9055	3.9212	3.9371	3.9534	3.9701	3.9873	4.0051	4.0235	4.0425	4.0624
2.3922	2.4818	2.5708	2.6581	2.7428	2.8242	2.9018	2.9752	3.044	3.1081	3.1674	3.2221	3.2724	3.3183	3.3603	3.3987	3.4342	3.467	3.4974	3.5257	3.5522	3.577	3.6004	3.6225	3.6433	3.6631	3.682	3.7002	3.7177	3.7348	3.7514	3.7676	3.7836	3.7992	3.8147	3.83	3.8452	3.8603	3.8755	3.8907	3.9061	3.9217	3.9377	3.9539	3.9706	3.9878	4.0056	4.024	4.043	4.0628
2.392	2.4819	2.5711	2.6586	2.7434	2.8249	2.9025	2.976	3.0448	3.1089	3.1683	3.223	3.2733	3.3192	3.3611	3.3996	3.4349	3.4676	3.498	3.5262	3.5526	3.5773	3.6006	3.6226	3.6434	3.6632	3.6821	3.7003	3.7178	3.7349	3.7516	3.7679	3.7839	3.7996	3.8151	3.8304	3.8457	3.8609	3.876	3.8913	3.9067	3.9223	3.9383	3.9545	3.9712	3.9884	4.0061	4.0245	4.0435	4.0633
2.3919	2.482	2.5713	2.659	2.7439	2.8255	2.9033	2.9768	3.0457	3.1098	3.1692	3.224	3.2742	3.3201	3.362	3.4004	3.4357	3.4683	3.4986	3.5267	3.5529	3.5776	3.6008	3.6228	3.6435	3.6633	3.6822	3.7004	3.7179	3.735	3.7518	3.7681	3.7842	3.7999	3.8155	3.8309	3.8462	3.8614	3.8766	3.8919	3.9073	3.9229	3.9388	3.9551	3.9718	3.9889	4.0066	4.025	4.044	4.0638
2.3918	2.4821	2.5716	2.6594	2.7445	2.8262	2.904	2.9775	3.0465	3.1107	3.1701	3.2249	3.2751	3.321	3.3629	3.4013	3.4365	3.469	3.4991	3.5271	3.5533	3.5779	3.601	3.6229	3.6437	3.6634	3.6823	3.7004	3.718	3.7352	3.7519	3.7684	3.7845	3.8003	3.8159	3.8314	3.8467	3.862	3.8772	3.8925	3.9079	3.9235	3.9394	3.9557	3.9723	3.9895	4.0072	4.0255	4.0445	4.0642
2.3917	2.4821	2.5719	2.6598	2.745	2.8268	2.9047	2.9783	3.0473	3.1115	3.171	3.2258	3.2761	3.3219	3.3638	3.4021	3.4373	3.4697	3.4997	3.5276	3.5537	3.5782	3.6012	3.6231	3.6438	3.6635	3.6824	3.7005	3.7181	3.7353	3.7521	3.7686	3.7848	3.8007	3.8163	3.8319	3.8472	3.8625	3.8778	3.8931	3.9085	3.9241	3.94	3.9563	3.9729	3.99	4.0077	4.026	4.045	4.0647
2.3916	2.4822	2.5721	2.6602	2.7456	2.8275	2.9054	2.9791	3.0481	3.1124	3.1719	3.2267	3.277	3.3229	3.3647	3.403	3.4381	3.4704	3.5003	3.5281	3.554	3.5784	3.6015	3.6232	3.6439	3.6636	3.6824	3.7006	3.7183	3.7355	3.7523	3.7688	3.7851	3.801	3.8168	3.8323	3.8477	3.8631	3.8784	3.8937	3.9091	3.9248	3.9406	3.9569	3.9735	3.9906	4.0082	4.0265	4.0455	4.0652
2.3915	2.4823	2.5724	2.6607	2.7461	2.8281	2.9062	2.9799	3.049	3.1133	3.1728	3.2276	3.2779	3.3238	3.3656	3.4038	3.4388	3.4711	3.5009	3.5286	3.5544	3.5787	3.6017	3.6234	3.644	3.6637	3.6825	3.7007	3.7184	3.7356	3.7525	3.7691	3.7854	3.8014	3.8172	3.8328	3.8483	3.8636	3.8789	3.8943	3.9097	3.9254	3.9412	3.9574	3.9741	3.9911	4.0088	4.027	4.046	4.0656
2.3913	2.4824	2.5726	2.6611	2.7467	2.8288	2.9069	2.9807	3.0498	3.1141	3.1737	3.2286	3.2788	3.3247	3.3665	3.4047	3.4396	3.4718	3.5015	3.529	3.5548	3.579	3.6019	3.6235	3.6441	3.6638	3.6826	3.7008	3.7185	3.7358	3.7527	3.7693	3.7857	3.8017	3.8176	3.8333	3.8488	3.8642	3.8795	3.8949	3.9103	3.926	3.9418	3.958	3.9746	3.9917	4.0093	4.0275	4.0464	4.0661
2.3912	2.4825	2.5729	2.6615	2.7472	2.8294	2.9076	2.9815	3.0506	3.115	3.1746	3.2295	3.2798	3.3256	3.3674	3.4055	3.4404	3.4725	3.5021	3.5295	3.5552	3.5793	3.6021	3.6237	3.6442	3.6639	3.6827	3.7009	3.7186	3.7359	3.7529	3.7696	3.786	3.8021	3.818	3.8338	3.8493	3.8647	3.8801	3.8955	3.9109	3.9266	3.9424	3.9586	3.9752	3.9922	4.0098	4.028	4.0469	4.0666
2.3911	2.4825	2.5732	2.6619	2.7478	2.8301	2.9084	2.9822	3.0515	3.1159	3.1755	3.2304	3.2807	3.3266	3.3683	3.4064	3.4412	3.4732	3.5026	3.53	3.5555	3.5796	3.6023	3.6239	3.6444	3.6639	3.6828	3.701	3.7187	3.7361	3.7531	3.7698	3.7863	3.8025	3.8185	3.8342	3.8498	3.8653	3.8807	3.8961	3.9116	3.9272	3.9431	3.9592	3.9758	3.9928	4.0104	4.0286	4.0474	4.067
2.391	2.4826	2.5734	2.6624	2.7484	2.8307	2.9091	2.983	3.0523	3.1167	3.1764	3.2313	3.2816	3.3275	3.3692	3.4072	3.442	3.4739	3.5032	3.5305	3.5559	3.5799	3.6025	3.624	3.6445	3.664	3.6829	3.7011	3.7188	3.7362	3.7533	3.7701	3.7866	3.8028	3.8189	3.8347	3.8504	3.8659	3.8813	3.8967	3.9122	3.9278	3.9437	3.9598	3.9764	3.9934	4.0109	4.0291	4.0479	4.0675
2.3909	2.4827	2.5737	2.6628	2.7489	2.8314	2.9098	2.9838	3.0531	3.1176	3.1773	3.2323	3.2826	3.3284	3.3701	3.4081	3.4428	3.4745	3.5038	3.531	3.5563	3.5802	3.6027	3.6242	3.6446	3.6641	3.6829	3.7012	3.7189	3.7363	3.7535	3.7703	3.7869	3.8032	3.8193	3.8352	3.8509	3.8664	3.8819	3.8973	3.9128	3.9284	3.9443	3.9604	3.9769	3.9939	4.0115	4.0296	4.0484	4.068
2.3908	2.4828	2.574	2.6632	2.7495	2.8321	2.9106	2.9846	3.054	3.1185	3.1782	3.2332	3.2835	3.3293	3.371	3.4089	3.4435	3.4752	3.5044	3.5314	3.5567	3.5804	3.603	3.6243	3.6447	3.6642	3.683	3.7013	3.719	3.7365	3.7537	3.7706	3.7872	3.8036	3.8197	3.8357	3.8514	3.867	3.8825	3.8979	3.9134	3.929	3.9449	3.961	3.9775	3.9945	4.012	4.0301	4.0489	4.0685
2.3906	2.4828	2.5742	2.6636	2.75	2.8327	2.9113	2.9854	3.0548	3.1194	3.1791	3.2341	3.2845	3.3303	3.3719	3.4098	3.4443	3.4759	3.505	3.5319	3.557	3.5807	3.6032	3.6245	3.6448	3.6643	3.6831	3.7013	3.7191	3.7366	3.7538	3.7708	3.7875	3.8039	3.8202	3.8362	3.8519	3.8676	3.883	3.8985	3.914	3.9296	3.9455	3.9616	3.9781	3.9951	4.0125	4.0306	4.0494	4.0689
2.3905	2.4829	2.5745	2.6641	2.7506	2.8334	2.912	2.9862	3.0556	3.1202	3.18	3.235	3.2854	3.3312	3.3728	3.4106	3.4451	3.4766	3.5056	3.5324	3.5574	3.581	3.6034	3.6246	3.6449	3.6644	3.6832	3.7014	3.7193	3.7368	3.754	3.771	3.7878	3.8043	3.8206	3.8366	3.8525	3.8681	3.8836	3.8991	3.9146	3.9303	3.9461	3.9622	3.9787	3.9956	4.0131	4.0311	4.0499	4.0694
2.3904	2.483	2.5747	2.6645	2.7511	2.834	2.9128	2.987	3.0565	3.1211	3.1809	3.236	3.2863	3.3321	3.3737	3.4115	3.4459	3.4773	3.5062	3.5329	3.5578	3.5813	3.6036	3.6248	3.6451	3.6645	3.6833	3.7015	3.7194	3.7369	3.7542	3.7713	3.7881	3.8047	3.821	3.8371	3.853	3.8687	3.8842	3.8997	3.9152	3.9309	3.9467	3.9628	3.9793	3.9962	4.0136	4.0317	4.0504	4.0699
2.3903	2.4831	2.575	2.6649	2.7517	2.8347	2.9135	2.9878	3.0573	3.122	3.1818	3.2369	3.2873	3.333	3.3746	3.4124	3.4467	3.478	3.5068	3.5334	3.5582	3.5816	3.6038	3.625	3.6452	3.6646	3.6834	3.7016	3.7195	3.7371	3.7544	3.7715	3.7884	3.805	3.8214	3.8376	3.8535	3.8692	3.8848	3.9003	3.9158	3.9315	3.9473	3.9634	3.9798	3.9967	4.0142	4.0322	4.0509	4.0704
2.3902	2.4832	2.5753	2.6653	2.7523	2.8354	2.9142	2.9886	3.0582	3.1229	3.1827	3.2378	3.2882	3.334	3.3755	3.4132	3.4475	3.4787	3.5074	3.5338	3.5585	3.5819	3.604	3.6251	3.6453	3.6647	3.6835	3.7017	3.7196	3.7372	3.7546	3.7718	3.7887	3.8054	3.8219	3.8381	3.8541	3.8698	3.8854	3.9009	3.9165	3.9321	3.9479	3.964	3.9804	3.9973	4.0147	4.0327	4.0514	4.0709
[truncated: 51 more columns]

## Sheet: Fig1S2I
0.49	0.4862	0.5082	0.57463	0.6782	0.76034	0.80488	0.86728	1.0748	1.3565	1.5364	1.6333	1.6943	1.7398	1.7752	1.8028	1.8241	1.8402	1.8519	1.8598	1.8644	1.8661	1.8651	1.8617	1.8562	1.8487	1.8395	1.8288	1.8167	1.8035	1.7894	1.7746	1.7595	1.7444	1.7292	1.714	1.6989	1.6837	1.6686	1.6535	1.6385	1.6236	1.6087	1.5939	1.5793	1.5647	1.5503	1.536	1.5219	1.5079
0.48808	0.48446	0.50571	0.57039	0.6715	0.75179	0.7953	0.85624	1.0592	1.3353	1.5131	1.6108	1.6741	1.7222	1.7601	1.7899	1.813	1.8305	1.8434	1.8522	1.8574	1.8596	1.8589	1.8558	1.8504	1.843	1.8339	1.8233	1.8113	1.7983	1.7844	1.7699	1.755	1.7401	1.7252	1.7104	1.6956	1.6808	1.666	1.6513	1.6367	1.6221	1.6076	1.5932	1.5789	1.5647	1.5506	1.5366	1.5227	1.509
0.48617	0.48272	0.50322	0.56616	0.6648	0.74325	0.78573	0.8452	1.0436	1.314	1.4898	1.5883	1.6538	1.7046	1.7451	1.7771	1.802	1.8209	1.8348	1.8445	1.8505	1.8531	1.8527	1.8498	1.8446	1.8374	1.8283	1.8178	1.806	1.7931	1.7794	1.7651	1.7505	1.7359	1.7213	1.7068	1.6923	1.6778	1.6635	1.6491	1.6349	1.6207	1.6065	1.5925	1.5785	1.5646	1.5508	1.5371	1.5236	1.5101
0.48427	0.48098	0.50074	0.56193	0.65812	0.73472	0.77617	0.83418	1.028	1.2928	1.4665	1.5658	1.6335	1.6871	1.7301	1.7643	1.7909	1.8112	1.8262	1.8368	1.8435	1.8466	1.8466	1.8439	1.8388	1.8317	1.8228	1.8123	1.8006	1.7878	1.7743	1.7603	1.746	1.7316	1.7174	1.7031	1.689	1.6749	1.6609	1.6469	1.633	1.6192	1.6054	1.5917	1.5781	1.5646	1.5511	1.5377	1.5244	1.5112
0.48236	0.47924	0.49826	0.55772	0.65145	0.72621	0.76662	0.82319	1.0124	1.2717	1.4433	1.5434	1.6133	1.6695	1.7151	1.7514	1.7798	1.8015	1.8177	1.8292	1.8365	1.8401	1.8404	1.8379	1.833	1.826	1.8172	1.8068	1.7952	1.7826	1.7693	1.7555	1.7415	1.7274	1.7134	1.6995	1.6857	1.672	1.6583	1.6447	1.6312	1.6177	1.6043	1.591	1.5777	1.5645	1.5514	1.5383	1.5253	1.5123
0.48046	0.4775	0.4958	0.55353	0.6448	0.71772	0.75711	0.81222	0.99689	1.2506	1.4201	1.5211	1.5932	1.6521	1.7002	1.7387	1.7688	1.7919	1.8092	1.8215	1.8295	1.8336	1.8343	1.832	1.8272	1.8203	1.8116	1.8013	1.7898	1.7774	1.7643	1.7507	1.7369	1.7232	1.7095	1.6959	1.6824	1.669	1.6557	1.6425	1.6293	1.6163	1.6032	1.5903	1.5774	1.5645	1.5517	1.5389	1.5261	1.5134
0.47856	0.47578	0.49335	0.54935	0.63818	0.70926	0.74762	0.8013	0.98143	1.2295	1.397	1.4988	1.5731	1.6346	1.6853	1.7259	1.7578	1.7823	1.8006	1.8139	1.8225	1.8271	1.8281	1.8261	1.8215	1.8146	1.806	1.7958	1.7844	1.7722	1.7593	1.746	1.7324	1.7189	1.7056	1.6923	1.6791	1.6661	1.6531	1.6403	1.6275	1.6148	1.6021	1.5895	1.577	1.5644	1.5519	1.5394	1.5269	1.5144
0.47667	0.47406	0.49091	0.5452	0.63159	0.70083	0.73818	0.79043	0.96604	1.2086	1.374	1.4766	1.553	1.6173	1.6704	1.7132	1.7468	1.7727	1.7921	1.8062	1.8156	1.8206	1.8219	1.8201	1.8157	1.809	1.8004	1.7903	1.7791	1.767	1.7543	1.7412	1.7279	1.7147	1.7016	1.6887	1.6758	1.6631	1.6505	1.638	1.6256	1.6133	1.601	1.5888	1.5765	1.5643	1.5522	1.54	1.5277	1.5155
0.47479	0.47234	0.48849	0.54108	0.62504	0.69245	0.72878	0.77961	0.95072	1.1877	1.3511	1.4545	1.5331	1.6	1.6556	1.7005	1.7359	1.7631	1.7836	1.7986	1.8086	1.8141	1.8158	1.8142	1.8099	1.8033	1.7948	1.7848	1.7737	1.7618	1.7493	1.7364	1.7234	1.7105	1.6977	1.685	1.6725	1.6602	1.6479	1.6358	1.6238	1.6118	1.5999	1.588	1.5761	1.5643	1.5524	1.5405	1.5285	1.5165
0.47292	0.47064	0.48609	0.53699	0.61853	0.68411	0.71943	0.76885	0.9355	1.167	1.3283	1.4325	1.5133	1.5828	1.6409	1.6879	1.725	1.7535	1.7752	1.791	1.8017	1.8077	1.8096	1.8083	1.8041	1.7976	1.7893	1.7794	1.7684	1.7566	1.7443	1.7317	1.7189	1.7063	1.6938	1.6814	1.6692	1.6572	1.6453	1.6336	1.6219	1.6103	1.5987	1.5872	1.5757	1.5642	1.5526	1.541	1.5293	1.5176
0.47105	0.46894	0.48371	0.53294	0.61206	0.67583	0.71014	0.75817	0.92037	1.1464	1.3056	1.4106	1.4935	1.5657	1.6262	1.6754	1.7142	1.744	1.7667	1.7834	1.7947	1.8012	1.8035	1.8024	1.7984	1.792	1.7837	1.7739	1.763	1.7514	1.7393	1.7269	1.7144	1.702	1.6898	1.6778	1.666	1.6543	1.6427	1.6313	1.62	1.6088	1.5976	1.5864	1.5752	1.564	1.5528	1.5415	1.5301	1.5186
0.4692	0.46726	0.48136	0.52893	0.60566	0.6676	0.70092	0.74757	0.90536	1.1259	1.2831	1.3889	1.474	1.5487	1.6117	1.6629	1.7033	1.7345	1.7583	1.7758	1.7878	1.7947	1.7974	1.7964	1.7926	1.7863	1.7781	1.7685	1.7577	1.7463	1.7344	1.7222	1.7099	1.6978	1.6859	1.6742	1.6627	1.6513	1.6401	1.6291	1.6181	1.6073	1.5964	1.5856	1.5748	1.5639	1.553	1.542	1.5308	1.5195
0.46736	0.46558	0.47903	0.52496	0.5993	0.65944	0.69177	0.73705	0.89047	1.1056	1.2608	1.3673	1.4545	1.5318	1.5972	1.6504	1.6926	1.7251	1.7499	1.7682	1.7808	1.7882	1.7912	1.7905	1.7868	1.7807	1.7726	1.763	1.7524	1.7411	1.7294	1.7175	1.7055	1.6936	1.682	1.6706	1.6594	1.6483	1.6375	1.6268	1.6162	1.6057	1.5952	1.5848	1.5743	1.5638	1.5532	1.5424	1.5316	1.5205
0.46553	0.46392	0.47673	0.52105	0.59302	0.65135	0.68269	0.72663	0.87571	1.0855	1.2387	1.346	1.4352	1.515	1.5828	1.6381	1.6819	1.7157	1.7415	1.7607	1.7739	1.7818	1.7851	1.7846	1.7811	1.7751	1.7671	1.7576	1.7471	1.736	1.7245	1.7128	1.701	1.6894	1.6781	1.667	1.6561	1.6454	1.6349	1.6245	1.6143	1.6042	1.594	1.5839	1.5738	1.5636	1.5533	1.5429	1.5323	1.5214
0.46371	0.46227	0.47447	0.51719	0.5868	0.64333	0.6737	0.71632	0.8611	1.0656	1.2167	1.3248	1.4161	1.4984	1.5685	1.6258	1.6713	1.7063	1.7332	1.7531	1.767	1.7753	1.779	1.7787	1.7753	1.7694	1.7615	1.7522	1.7418	1.7309	1.7196	1.7081	1.6966	1.6852	1.6742	1.6633	1.6528	1.6424	1.6323	1.6223	1.6124	1.6026	1.5928	1.5831	1.5733	1.5634	1.5534	1.5433	1.5329	1.5223
0.46191	0.46064	0.47224	0.51338	0.58065	0.6354	0.6648	0.70612	0.84664	1.0458	1.195	1.3038	1.3971	1.4819	1.5544	1.6136	1.6607	1.697	1.7248	1.7456	1.7601	1.7689	1.7728	1.7728	1.7696	1.7638	1.756	1.7468	1.7365	1.7257	1.7146	1.7034	1.6921	1.6811	1.6703	1.6597	1.6495	1.6394	1.6296	1.62	1.6105	1.601	1.5916	1.5822	1.5727	1.5632	1.5535	1.5436	1.5336	1.5232
0.46012	0.45902	0.47004	0.50964	0.57459	0.62755	0.656	0.69604	0.83235	1.0263	1.1735	1.283	1.3783	1.4655	1.5403	1.6016	1.6502	1.6878	1.7166	1.7381	1.7532	1.7625	1.7667	1.7669	1.7639	1.7582	1.7505	1.7414	1.7313	1.7207	1.7097	1.6987	1.6877	1.6769	1.6664	1.6561	1.6461	1.6364	1.627	1.6177	1.6085	1.5994	1.5904	1.5813	1.5722	1.5629	1.5536	1.544	1.5342	1.5241
0.45835	0.45743	0.46789	0.50596	0.56861	0.6198	0.6473	0.68608	0.81823	1.007	1.1523	1.2625	1.3598	1.4494	1.5264	1.5896	1.6398	1.6786	1.7083	1.7307	1.7464	1.756	1.7606	1.761	1.7582	1.7526	1.7451	1.736	1.726	1.7156	1.7049	1.694	1.6833	1.6727	1.6625	1.6525	1.6428	1.6335	1.6243	1.6154	1.6065	1.5978	1.5891	1.5804	1.5716	1.5627	1.5536	1.5443	1.5348	1.5249
0.4566	0.45584	0.46577	0.50236	0.56272	0.61214	0.63871	0.67627	0.80431	0.98794	1.1313	1.2422	1.3414	1.4334	1.5127	1.5777	1.6294	1.6694	1.7002	1.7232	1.7395	1.7496	1.7545	1.7552	1.7524	1.747	1.7396	1.7307	1.7208	1.7105	1.7	1.6894	1.6789	1.6686	1.6586	1.6489	1.6395	1.6305	1.6216	1.613	1.6045	1.5961	1.5878	1.5794	1.5709	1.5624	1.5536	1.5446	1.5353	1.5257
0.45487	0.45428	0.4637	0.49882	0.55693	0.60459	0.63024	0.66659	0.79058	0.96915	1.1106	1.2222	1.3233	1.4176	1.499	1.566	1.6192	1.6604	1.692	1.7158	1.7327	1.7432	1.7484	1.7493	1.7467	1.7415	1.7341	1.7253	1.7156	1.7055	1.6952	1.6848	1.6745	1.6644	1.6547	1.6453	1.6362	1.6274	1.619	1.6107	1.6025	1.5945	1.5865	1.5784	1.5703	1.562	1.5536	1.5449	1.5358	1.5264
0.45316	0.45274	0.46168	0.49537	0.55124	0.59716	0.6219	0.65707	0.77706	0.95062	1.0902	1.2024	1.3054	1.402	1.4856	1.5543	1.609	1.6514	1.6839	1.7084	1.7259	1.7368	1.7423	1.7434	1.741	1.7359	1.7287	1.72	1.7104	1.7005	1.6903	1.6802	1.6701	1.6603	1.6508	1.6417	1.6329	1.6244	1.6163	1.6083	1.6005	1.5928	1.5851	1.5774	1.5696	1.5617	1.5535	1.5451	1.5363	1.5271
0.45147	0.45122	0.45971	0.492	0.54565	0.58983	0.61368	0.64771	0.76377	0.93239	1.0701	1.1829	1.2878	1.3866	1.4723	1.5428	1.599	1.6424	1.6758	1.7011	1.7191	1.7304	1.7362	1.7376	1.7354	1.7304	1.7233	1.7147	1.7053	1.6955	1.6855	1.6756	1.6657	1.6562	1.6469	1.6381	1.6296	1.6214	1.6136	1.6059	1.5985	1.5911	1.5837	1.5764	1.5689	1.5613	1.5534	1.5452	1.5367	1.5278
0.4498	0.44972	0.45779	0.48871	0.54018	0.58264	0.6056	0.63852	0.75071	0.91445	1.0503	1.1638	1.2704	1.3714	1.4592	1.5315	1.589	1.6335	1.6678	1.6938	1.7123	1.724	1.7301	1.7317	1.7297	1.7248	1.7179	1.7094	1.7001	1.6905	1.6808	1.671	1.6614	1.652	1.6431	1.6345	1.6262	1.6184	1.6108	1.6035	1.5964	1.5894	1.5823	1.5753	1.5682	1.5608	1.5533	1.5454	1.5371	1.5284
0.44815	0.44824	0.45592	0.48551	0.53482	0.57557	0.59766	0.62951	0.7379	0.89683	1.0308	1.1449	1.2533	1.3564	1.4462	1.5202	1.5792	1.6248	1.6599	1.6865	1.7055	1.7177	1.7241	1.7259	1.724	1.7193	1.7125	1.7042	1.695	1.6856	1.676	1.6664	1.657	1.6479	1.6392	1.6309	1.6229	1.6154	1.6081	1.6011	1.5943	1.5876	1.5809	1.5742	1.5674	1.5604	1.5531	1.5455	1.5375	1.529
0.44653	0.44679	0.4541	0.48241	0.52958	0.56863	0.58987	0.62068	0.72534	0.87954	1.0117	1.1264	1.2365	1.3417	1.4335	1.5092	1.5694	1.6161	1.652	1.6792	1.6988	1.7113	1.718	1.72	1.7184	1.7138	1.7071	1.6989	1.6899	1.6806	1.6713	1.6619	1.6527	1.6439	1.6354	1.6273	1.6196	1.6123	1.6054	1.5987	1.5922	1.5858	1.5795	1.5731	1.5665	1.5598	1.5529	1.5455	1.5378	1.5295
0.44493	0.44537	0.45235	0.47941	0.52447	0.56184	0.58223	0.61204	0.71304	0.86259	0.99299	1.1083	1.22	1.3273	1.4209	1.4982	1.5598	1.6074	1.6442	1.672	1.6921	1.705	1.712	1.7142	1.7127	1.7083	1.7018	1.6937	1.6849	1.6757	1.6666	1.6574	1.6484	1.6398	1.6315	1.6237	1.6162	1.6092	1.6026	1.5962	1.5901	1.584	1.578	1.5719	1.5657	1.5593	1.5526	1.5455	1.538	1.5299
0.44336	0.44397	0.45066	0.47651	0.5195	0.55519	0.57476	0.6036	0.70103	0.84601	0.97465	1.0905	1.2039	1.3131	1.4086	1.4875	1.5503	1.5989	1.6364	1.6649	1.6854	1.6986	1.7059	1.7084	1.7071	1.7029	1.6964	1.6885	1.6798	1.6709	1.6619	1.6529	1.6442	1.6357	1.6277	1.6201	1.6129	1.6062	1.5998	1.5938	1.5879	1.5822	1.5764	1.5707	1.5648	1.5587	1.5523	1.5455	1.5382	1.5304
0.44182	0.4426	0.44903	0.47372	0.51466	0.54869	0.56746	0.59537	0.6893	0.82979	0.9567	1.0731	1.188	1.2991	1.3965	1.4769	1.5409	1.5905	1.6287	1.6577	1.6787	1.6923	1.6999	1.7026	1.7015	1.6974	1.6911	1.6834	1.6748	1.666	1.6572	1.6485	1.6399	1.6317	1.6239	1.6165	1.6096	1.6031	1.597	1.5913	1.5857	1.5803	1.5749	1.5694	1.5639	1.558	1.5519	1.5454	1.5383	1.5307
0.4403	0.44125	0.44747	0.47104	0.50996	0.54235	0.56033	0.58736	0.67787	0.81397	0.93917	1.056	1.1725	1.2855	1.3846	1.4664	1.5317	1.5821	1.621	1.6506	1.672	1.686	1.6939	1.6968	1.6959	1.692	1.6859	1.6783	1.6699	1.6612	1.6526	1.644	1.6357	1.6276	1.62	1.6129	1.6062	1.6	1.5942	1.5888	1.5835	1.5784	1.5733	1.5682	1.5629	1.5573	1.5515	1.5452	1.5384	1.531
0.43881	0.43994	0.44598	0.46848	0.50542	0.53618	0.55339	0.57957	0.66676	0.79854	0.92207	1.0394	1.1573	1.2721	1.3729	1.4562	1.5226	1.5739	1.6135	1.6436	1.6654	1.6797	1.6878	1.691	1.6903	1.6866	1.6806	1.6732	1.6649	1.6565	1.648	1.6396	1.6314	1.6236	1.6162	1.6093	1.6029	1.5969	1.5914	1.5862	1.5813	1.5764	1.5717	1.5668	1.5618	1.5566	1.551	1.545	1.5385	1.5313
0.43736	0.43866	0.44455	0.46603	0.50103	0.53017	0.54663	0.57202	0.65596	0.78353	0.90542	1.0232	1.1426	1.2591	1.3615	1.4461	1.5136	1.5657	1.6059	1.6366	1.6588	1.6735	1.6818	1.6852	1.6847	1.6812	1.6754	1.6681	1.66	1.6517	1.6434	1.6352	1.6273	1.6196	1.6124	1.6057	1.5995	1.5938	1.5886	1.5837	1.579	1.5745	1.57	1.5655	1.5608	1.5558	1.5505	1.5448	1.5384	1.5315
0.43593	0.43741	0.44321	0.46371	0.49679	0.52434	0.54007	0.56471	0.6455	0.76895	0.88923	1.0074	1.1282	1.2463	1.3503	1.4363	1.5048	1.5577	1.5985	1.6296	1.6522	1.6672	1.6758	1.6795	1.6791	1.6758	1.6702	1.663	1.6551	1.647	1.6389	1.6309	1.6231	1.6157	1.6087	1.6021	1.5961	1.5907	1.5857	1.5811	1.5767	1.5725	1.5683	1.564	1.5596	1.555	1.55	1.5444	1.5384	1.5316
0.43454	0.43619	0.44193	0.46151	0.49273	0.51869	0.53371	0.55764	0.63539	0.75482	0.87351	0.99213	1.1141	1.2339	1.3393	1.4266	1.4961	1.5497	1.5911	1.6227	1.6457	1.661	1.6699	1.6737	1.6736	1.6704	1.665	1.658	1.6503	1.6423	1.6344	1.6266	1.6189	1.6117	1.6049	1.5986	1.5928	1.5876	1.5828	1.5785	1.5744	1.5704	1.5665	1.5626	1.5585	1.5541	1.5493	1.5441	1.5382	1.5317
0.43318	0.435	0.44074	0.45945	0.48883	0.51323	0.52756	0.55083	0.62562	0.74114	0.85828	0.97728	1.1005	1.2218	1.3287	1.4171	1.4876	1.5419	1.5839	1.6158	1.6392	1.6547	1.6639	1.668	1.6681	1.6651	1.6598	1.6531	1.6455	1.6377	1.6299	1.6223	1.6148	1.6077	1.6011	1.595	1.5894	1.5844	1.5799	1.5758	1.572	1.5683	1.5647	1.5611	1.5572	1.5531	1.5486	1.5436	1.538	1.5316
0.43186	0.43385	0.43963	0.45752	0.48511	0.50796	0.52162	0.54429	0.61623	0.72794	0.84356	0.9629	1.0873	1.2101	1.3183	1.4079	1.4792	1.5342	1.5767	1.609	1.6327	1.6485	1.6579	1.6623	1.6626	1.6598	1.6547	1.6481	1.6407	1.6331	1.6255	1.618	1.6107	1.6038	1.5973	1.5914	1.586	1.5813	1.577	1.5732	1.5696	1.5662	1.5629	1.5595	1.556	1.5521	1.5479	1.5431	1.5377	1.5316
0.43057	0.43274	0.4386	0.45573	0.48156	0.50289	0.5159	0.53801	0.60721	0.71523	0.82937	0.94902	1.0746	1.1987	1.3082	1.3988	1.471	1.5266	1.5695	1.6023	1.6262	1.6423	1.652	1.6565	1.6571	1.6545	1.6496	1.6432	1.636	1.6285	1.6211	1.6138	1.6067	1.5999	1.5936	1.5878	1.5826	1.5781	1.5741	1.5705	1.5672	1.5641	1.561	1.5579	1.5546	1.5511	1.5471	1.5426	1.5374	1.5314
0.42932	0.43166	0.43765	0.45409	0.47821	0.49802	0.51041	0.53202	0.59858	0.70302	0.81571	0.93565	1.0623	1.1877	1.2984	1.39	1.463	1.5192	1.5625	1.5956	1.6198	1.6362	1.6461	1.6508	1.6516	1.6492	1.6445	1.6383	1.6313	1.624	1.6167	1.6096	1.6026	1.596	1.5899	1.5843	1.5793	1.5749	1.5711	1.5678	1.5647	1.5619	1.5591	1.5562	1.5532	1.5499	1.5462	1.5419	1.537	1.5312
0.42811	0.43063	0.4368	0.45259	0.47504	0.49337	0.50515	0.52632	0.59036	0.69132	0.8026	0.9228	1.0504	1.177	1.2888	1.3814	1.4551	1.5118	1.5555	1.5889	1.6134	1.63	1.6402	1.6452	1.6461	1.644	1.6395	1.6335	1.6266	1.6195	1.6124	1.6054	1.5986	1.5921	1.5861	1.5807	1.5759	1.5717	1.5681	1.565	1.5622	1.5596	1.5571	1.5545	1.5518	1.5487	1.5453	1.5412	1.5365	1.5309
0.42693	0.42963	0.43603	0.45125	0.47207	0.48893	0.50013	0.52092	0.58254	0.68016	0.79006	0.91049	1.039	1.1667	1.2796	1.3731	1.4474	1.5046	1.5487	1.5823	1.607	1.6239	1.6342	1.6395	1.6407	1.6388	1.6345	1.6287	1.622	1.6151	1.6081	1.6013	1.5946	1.5883	1.5824	1.5771	1.5725	1.5685	1.5651	1.5622	1.5597	1.5573	1.5551	1.5528	1.5503	1.5475	1.5442	1.5404	1.5359	1.5305
0.4258	0.42867	0.43536	0.45007	0.4693	0.48471	0.49536	0.51581	0.57514	0.66954	0.77811	0.89873	1.0281	1.1569	1.2707	1.365	1.4399	1.4976	1.5419	1.5758	1.6007	1.6178	1.6284	1.6338	1.6353	1.6336	1.6295	1.6239	1.6174	1.6107	1.6039	1.5972	1.5906	1.5845	1.5787	1.5736	1.569	1.5653	1.5621	1.5594	1.5571	1.555	1.553	1.5509	1.5487	1.5462	1.5432	1.5396	1.5353	1.5301
0.4247	0.42775	0.43478	0.44904	0.46674	0.48072	0.49085	0.51103	0.56818	0.65948	0.76675	0.88753	1.0177	1.1474	1.2621	1.3571	1.4326	1.4906	1.5352	1.5693	1.5944	1.6117	1.6225	1.6282	1.6299	1.6284	1.6246	1.6192	1.6129	1.6063	1.5997	1.5931	1.5867	1.5807	1.575	1.57	1.5656	1.562	1.559	1.5566	1.5545	1.5526	1.5509	1.5491	1.5471	1.5448	1.542	1.5386	1.5345	1.5295
0.42365	0.42688	0.43431	0.44818	0.4644	0.47696	0.48659	0.50656	0.56166	0.64999	0.75601	0.87691	1.0078	1.1384	1.2539	1.3495	1.4255	1.4838	1.5287	1.5629	1.5882	1.6056	1.6166	1.6226	1.6245	1.6232	1.6197	1.6145	1.6084	1.602	1.5955	1.5891	1.5828	1.5769	1.5714	1.5664	1.5622	1.5588	1.556	1.5537	1.5518	1.5502	1.5487	1.5471	1.5454	1.5433	1.5408	1.5376	1.5337	1.5289
0.42264	0.42604	0.43393	0.44749	0.46227	0.47344	0.4826	0.50242	0.5556	0.64109	0.7459	0.86689	0.99838	1.1297	1.246	1.3422	1.4186	1.4772	1.5222	1.5565	1.5819	1.5995	1.6108	1.617	1.6191	1.6181	1.6148	1.6098	1.604	1.5977	1.5914	1.5851	1.5789	1.5731	1.5677	1.5629	1.5588	1.5555	1.5529	1.5508	1.5491	1.5477	1.5464	1.5451	1.5436	1.5418	1.5395	1.5366	1.5328	1.5282
0.42168	0.42526	0.43365	0.44697	0.46036	0.47017	0.47888	0.49862	0.55	0.6328	0.73643	0.85748	0.98952	1.1216	1.2384	1.3351	1.4119	1.4707	1.5158	1.5502	1.5757	1.5935	1.605	1.6114	1.6138	1.613	1.61	1.6052	1.5996	1.5935	1.5873	1.5812	1.5751	1.5694	1.5641	1.5593	1.5554	1.5522	1.5497	1.5478	1.5464	1.5452	1.5441	1.5431	1.5418	1.5402	1.5381	1.5354	1.5319	1.5274
0.42076	0.42452	0.43349	0.44662	0.45868	0.46715	0.47544	0.49516	0.54488	0.62512	0.72762	0.84869	0.9812	1.1138	1.2312	1.3283	1.4054	1.4643	1.5095	1.544	1.5696	1.5875	1.5991	1.6058	1.6084	1.608	1.6052	1.6007	1.5952	1.5893	1.5833	1.5772	1.5713	1.5657	1.5604	1.5558	1.5519	1.5489	1.5466	1.5449	1.5436	1.5426	1.5418	1.5409	1.5399	1.5385	1.5366	1.5341	1.5308	1.5265
0.41988	0.42382	0.43342	0.44646	0.45724	0.46439	0.47228	0.49206	0.54025	0.61807	0.71949	0.84054	0.97344	1.1065	1.2243	1.3218	1.3991	1.4582	1.5034	1.5379	1.5635	1.5815	1.5933	1.6002	1.6031	1.603	1.6004	1.5962	1.5909	1.5852	1.5793	1.5734	1.5675	1.562	1.5568	1.5523	1.5485	1.5455	1.5434	1.5419	1.5408	1.54	1.5394	1.5387	1.5379	1.5368	1.5351	1.5328	1.5297	1.5256
0.41906	0.42317	0.43347	0.44649	0.45603	0.46189	0.46942	0.48932	0.53612	0.61167	0.71206	0.83304	0.96624	1.0997	1.2179	1.3156	1.393	1.4521	1.4973	1.5318	1.5574	1.5755	1.5876	1.5947	1.5979	1.598	1.5957	1.5917	1.5866	1.5811	1.5754	1.5696	1.5638	1.5583	1.5532	1.5487	1.545	1.5422	1.5402	1.5388	1.5379	1.5373	1.5369	1.5365	1.5359	1.5349	1.5335	1.5314	1.5284	1.5245
0.41828	0.42258	0.43364	0.4467	0.45507	0.45966	0.46686	0.48694	0.5325	0.60593	0.70532	0.82621	0.95963	1.0934	1.2118	1.3097	1.3872	1.4462	1.4914	1.5258	1.5514	1.5696	1.5818	1.5891	1.5926	1.593	1.591	1.5873	1.5824	1.5771	1.5715	1.5658	1.5601	1.5547	1.5496	1.5452	1.5416	1.5388	1.5369	1.5357	1.535	1.5346	1.5344	1.5341	1.5338	1.533	1.5318	1.5299	1.5271	1.5233
0.41755	0.42203	0.43391	0.4471	0.45435	0.4577	0.4646	0.48495	0.5294	0.60086	0.69931	0.82006	0.95362	1.0875	1.2061	1.304	1.3815	1.4405	1.4855	1.5198	1.5454	1.5637	1.576	1.5836	1.5874	1.5881	1.5863	1.5829	1.5783	1.5731	1.5677	1.562	1.5564	1.551	1.5461	1.5417	1.5381	1.5355	1.5337	1.5326	1.532	1.5318	1.5318	1.5318	1.5316	1.531	1.53	1.5283	1.5257	1.5221
0.41687	0.42153	0.43431	0.44771	0.4539	0.45603	0.46266	0.48333	0.52683	0.59648	0.69404	0.81461	0.94821	1.0822	1.2008	1.2987	1.3761	1.435	1.4798	1.5139	1.5395	1.5578	1.5703	1.5781	1.5822	1.5831	1.5817	1.5785	1.5742	1.5692	1.5639	1.5584	1.5528	1.5475	1.5425	1.5381	1.5346	1.5321	1.5304	1.5294	1.529	1.529	1.5291	1.5293	1.5293	1.529	1.5281	1.5266	1.5241	1.5207
0.41624	0.42108	0.43482	0.44851	0.4537	0.45464	0.46103	0.48212	0.52481	0.59281	0.68952	0.80987	0.94342	1.0774	1.1959	1.2937	1.371	1.4296	1.4742	1.5081	1.5336	1.5519	1.5646	1.5727	1.577	1.5783	1.5772	1.5743	1.5702	1.5654	1.5602	1.5547	1.5492	1.5439	1.539	1.5346	1.5311	1.5286	1.5271	1.5262	1.526	1.5261	1.5264	1.5267	1.5269	1.5268	1.5261	1.5248	1.5225	1.5192
0.41567	0.42069	0.43546	0.44952	0.45376	0.45354	0.45972	0.48129	0.52334	0.58984	0.68576	0.80584	0.93926	1.073	1.1914	1.289	1.3661	1.4244	1.4687	1.5024	1.5277	1.5461	1.5589	1.5672	1.5718	1.5734	1.5726	1.57	1.5662	1.5616	1.5565	1.5511	1.5457	1.5404	1.5354	1.5311	1.5276	1.5252	1.5237	1.523	1.5229	1.5231	1.5236	1.5241	1.5245	1.5245	1.5241	1.5229	1.5208	1.5177
0.41514	0.42035	0.43621	0.45073	0.45409	0.45272	0.45873	0.48086	0.52241	0.58758	0.68275	0.80253	0.93572	1.0692	1.1873	1.2846	1.3614	1.4194	1.4634	1.4968	1.5219	1.5403	1.5532	1.5618	1.5667	1.5686	1.5682	1.5658	1.5622	1.5578	1.5528	1.5476	1.5421	1.5369	1.5319	1.5276	1.5241	1.5217	1.5203	1.5197	1.5197	1.5201	1.5208	1.5215	1.522	1.5222	1.5219	1.5209	1.519	1.516
0.41467	0.42006	0.43708	0.45213	0.45466	0.45218	0.45805	0.48081	0.52201	0.58599	0.68046	0.7999	0.93277	1.0659	1.1836	1.2806	1.3569	1.4146	1.4581	1.4912	1.5161	1.5345	1.5476	1.5564	1.5616	1.5638	1.5637	1.5617	1.5583	1.5541	1.5493	1.544	1.5387	1.5334	1.5284	1.5241	1.5206	1.5183	1.5169	1.5164	1.5165	1.517	1.5178	1.5187	1.5194	1.5198	1.5197	1.5188	1.5171	1.5142
0.41424	0.41981	0.43806	0.45372	0.45547	0.45191	0.45767	0.48113	0.52212	0.58506	0.67888	0.79793	0.93041	1.0631	1.1802	1.2768	1.3527	1.4099	1.453	1.4857	1.5104	1.5287	1.542	1.551	1.5565	1.5591	1.5593	1.5576	1.5545	1.5505	1.5457	1.5406	1.5352	1.5299	1.5249	1.5206	1.5171	1.5148	1.5135	1.513	1.5132	1.5139	1.5149	1.5159	1.5168	1.5173	1.5174	1.5167	1.515	1.5123
0.41386	0.41962	0.43915	0.45548	0.45652	0.45191	0.45758	0.48181	0.52272	0.58478	0.67799	0.79662	0.92861	1.0607	1.1773	1.2733	1.3487	1.4053	1.448	1.4803	1.5047	1.523	1.5364	1.5456	1.5514	1.5544	1.555	1.5536	1.5507	1.5469	1.5422	1.5372	1.5318	1.5265	1.5215	1.5171	1.5136	1.5113	1.51	1.5096	1.51	1.5108	1.5118	1.513	1.514	1.5148	1.515	1.5144	1.5129	1.5104
0.41353	0.41947	0.44034	0.45742	0.4578	0.45215	0.45778	0.48284	0.52381	0.58511	0.67776	0.79593	0.92735	1.0588	1.1747	1.2701	1.3449	1.401	1.4431	1.4749	1.4991	1.5173	1.5308	1.5403	1.5464	1.5497	1.5506	1.5496	1.547	1.5433	1.5388	1.5338	1.5284	1.5231	1.518	1.5136	1.5101	1.5077	1.5065	1.5062	1.5066	1.5075	1.5087	1.5101	1.5112	1.5121	1.5125	1.5121	1.5108	1.5083
0.41324	0.41936	0.44162	0.45952	0.45929	0.45264	0.45825	0.48421	0.52536	0.58605	0.67818	0.79584	0.92663	1.0573	1.1725	1.2672	1.3413	1.3968	1.4383	1.4697	1.4935	1.5116	1.5252	1.5349	1.5414	1.5451	1.5463	1.5456	1.5433	1.5398	1.5354	1.5304	1.5251	1.5197	1.5146	1.5101	1.5065	1.5042	1.503	1.5028	1.5033	1.5043	1.5056	1.5071	1.5084	1.5094	1.5099	1.5097	1.5085	1.5062
0.41299	0.4193	0.443	0.46178	0.46099	0.45337	0.45899	0.48591	0.52737	0.58758	0.67922	0.79635	0.92642	1.0562	1.1706	1.2645	1.3379	1.3927	1.4336	1.4645	1.488	1.506	1.5197	1.5296	1.5364	1.5405	1.5421	1.5417	1.5397	1.5363	1.5321	1.5271	1.5218	1.5164	1.5112	1.5066	1.503	1.5007	1.4995	1.4993	1.4998	1.501	1.5024	1.504	1.5055	1.5066	1.5073	1.5072	1.5062	1.504
0.41279	0.41927	0.44446	0.46419	0.4629	0.45434	0.45999	0.48793	0.52981	0.58966	0.68086	0.79742	0.92671	1.0556	1.169	1.2621	1.3347	1.3888	1.429	1.4593	1.4825	1.5004	1.5141	1.5244	1.5315	1.5359	1.5379	1.5378	1.5361	1.5329	1.5288	1.5239	1.5185	1.513	1.5078	1.5032	1.4995	1.4971	1.4959	1.4958	1.4964	1.4976	1.4992	1.5009	1.5025	1.5038	1.5046	1.5046	1.5037	1.5017
0.41263	0.41929	0.44602	0.46674	0.465	0.45552	0.46124	0.49025	0.53268	0.5923	0.68309	0.79905	0.92747	1.0553	1.1677	1.2599	1.3318	1.385	1.4245	1.4543	1.477	1.4948	1.5087	1.5191	1.5266	1.5313	1.5337	1.534	1.5325	1.5296	1.5255	1.5206	1.5153	1.5097	1.5044	1.4997	1.496	1.4935	1.4924	1.4922	1.4929	1.4942	1.4959	1.4977	1.4995	1.5009	1.5018	1.502	1.5012	1.4993
0.4125	0.41935	0.44765	0.46943	0.46728	0.45692	0.46274	0.49287	0.53596	0.59546	0.68588	0.8012	0.9287	1.0554	1.1668	1.258	1.3289	1.3814	1.4201	1.4493	1.4716	1.4893	1.5032	1.5139	1.5217	1.5268	1.5296	1.5302	1.529	1.5262	1.5223	1.5174	1.512	1.5065	1.5011	1.4962	1.4924	1.49	1.4888	1.4887	1.4894	1.4908	1.4926	1.4945	1.4964	1.498	1.499	1.4993	1.4987	1.4969
0.41242	0.41944	0.44936	0.47225	0.46974	0.45853	0.46447	0.49578	0.53963	0.59913	0.68921	0.80387	0.93037	1.0559	1.1661	1.2563	1.3263	1.3779	1.4159	1.4444	1.4663	1.4838	1.4978	1.5087	1.5168	1.5223	1.5255	1.5265	1.5255	1.523	1.5191	1.5143	1.5088	1.5032	1.4977	1.4928	1.4889	1.4864	1.4852	1.4851	1.4859	1.4874	1.4892	1.4913	1.4932	1.4949	1.4961	1.4966	1.496	1.4944
0.41237	0.41957	0.45114	0.4752	0.47238	0.46034	0.46643	0.49897	0.54368	0.60328	0.69306	0.80702	0.93247	1.0567	1.1657	1.2548	1.3238	1.3745	1.4117	1.4395	1.461	1.4783	1.4924	1.5035	1.5119	1.5179	1.5214	1.5228	1.5221	1.5197	1.5159	1.5111	1.5057	1.5	1.4944	1.4893	1.4854	1.4828	1.4816	1.4815	1.4824	1.4839	1.4858	1.488	1.4901	1.4919	1.4932	1.4938	1.4933	1.4918
0.41236	0.41973	0.45299	0.47826	0.47518	0.46234	0.46861	0.50242	0.54809	0.60791	0.69741	0.81065	0.93498	1.0579	1.1656	1.2535	1.3215	1.3712	1.4076	1.4347	1.4557	1.4729	1.487	1.4984	1.5071	1.5134	1.5174	1.5191	1.5187	1.5165	1.5128	1.508	1.5026	1.4967	1.491	1.4859	1.4818	1.4792	1.478	1.4779	1.4788	1.4804	1.4824	1.4846	1.4868	1.4888	1.4902	1.4909	1.4906	1.4891
0.41238	0.41993	0.4549	0.48143	0.47813	0.46452	0.471	0.50613	0.55286	0.61299	0.70225	0.81472	0.93788	1.0594	1.1658	1.2525	1.3194	1.3681	1.4036	1.43	1.4505	1.4675	1.4816	1.4932	1.5024	1.509	1.5134	1.5154	1.5154	1.5133	1.5097	1.505	1.4994	1.4935	1.4877	1.4825	1.4783	1.4756	1.4743	1.4743	1.4752	1.4768	1.4789	1.4812	1.4836	1.4856	1.4872	1.488	1.4878	1.4864
0.41243	0.42016	0.45688	0.48471	0.48123	0.46688	0.4736	0.51009	0.55796	0.6185	0.70754	0.81923	0.94116	1.0612	1.1662	1.2516	1.3174	1.3651	1.3997	1.4254	1.4454	1.4621	1.4763	1.4881	1.4976	1.5047	1.5094	1.5118	1.512	1.5102	1.5067	1.5019	1.4964	1.4904	1.4844	1.4791	1.4748	1.472	1.4707	1.4706	1.4716	1.4732	1.4754	1.4778	1.4803	1.4824	1.4841	1.485	1.4849	1.4836
0.41251	0.42041	0.45891	0.48808	0.48446	0.46942	0.47639	0.51428	0.56338	0.62442	0.71327	0.82415	0.9448	1.0634	1.1668	1.251	1.3156	1.3623	1.3959	1.4208	1.4403	1.4568	1.471	1.4831	1.4929	1.5003	1.5055	1.5083	1.5088	1.5071	1.5037	1.4989	1.4933	1.4872	1.4812	1.4757	1.4712	1.4684	1.4671	1.467	1.4679	1.4696	1.4719	1.4744	1.4769	1.4792	1.4809	1.482	1.482	1.4808
0.41263	0.4207	0.46099	0.49154	0.48783	0.47211	0.47937	0.5187	0.56911	0.63073	0.71942	0.82946	0.94878	1.0657	1.1677	1.2505	1.3139	1.3595	1.3921	1.4163	1.4352	1.4515	1.4658	1.478	1.4882	1.496	1.5016	1.5047	1.5055	1.504	1.5007	1.4959	1.4903	1.4841	1.4779	1.4723	1.4677	1.4648	1.4634	1.4633	1.4643	1.466	1.4683	1.4709	1.4735	1.4759	1.4778	1.4789	1.479	1.478
0.41277	0.42101	0.46311	0.49508	0.49133	0.47496	0.48252	0.52333	0.57513	0.63742	0.72597	0.83515	0.95308	1.0684	1.1688	1.2502	1.3124	1.3568	1.3885	1.4118	1.4302	1.4463	1.4606	1.473	1.4835	1.4918	1.4977	1.5012	1.5023	1.501	1.4977	1.493	1.4873	1.481	1.4747	1.4689	1.4642	1.4612	1.4597	1.4596	1.4606	1.4624	1.4648	1.4674	1.4701	1.4726	1.4745	1.4758	1.476	1.475
0.41294	0.42135	0.46529	0.4987	0.49493	0.47795	0.48585	0.52817	0.58143	0.64447	0.73289	0.84119	0.9577	1.0713	1.1701	1.2501	1.311	1.3543	1.3849	1.4074	1.4252	1.441	1.4554	1.4681	1.4789	1.4875	1.4939	1.4977	1.4991	1.498	1.4948	1.4901	1.4843	1.4779	1.4714	1.4655	1.4607	1.4576	1.4561	1.4559	1.4569	1.4588	1.4612	1.4639	1.4667	1.4692	1.4713	1.4726	1.473	1.4721
0.41314	0.42171	0.4675	0.50238	0.49865	0.48109	0.48934	0.5332	0.58799	0.65185	0.74017	0.84756	0.9626	1.0745	1.1716	1.2501	1.3097	1.3518	1.3815	1.4031	1.4203	1.4359	1.4502	1.4631	1.4743	1.4833	1.49	1.4943	1.4959	1.495	1.4919	1.4872	1.4813	1.4748	1.4682	1.4621	1.4572	1.454	1.4524	1.4522	1.4532	1.4551	1.4576	1.4603	1.4632	1.4658	1.468	1.4694	1.4699	1.4691
0.41336	0.42209	0.46974	0.50613	0.50246	0.48435	0.49299	0.53842	0.5948	0.65954	0.74779	0.85425	0.96778	1.0779	1.1733	1.2503	1.3085	1.3495	1.3781	1.3988	1.4155	1.4308	1.4451	1.4582	1.4697	1.4791	1.4863	1.4909	1.4928	1.492	1.489	1.4843	1.4783	1.4717	1.465	1.4588	1.4537	1.4504	1.4488	1.4486	1.4495	1.4514	1.4539	1.4568	1.4597	1.4624	1.4647	1.4662	1.4667	1.466
0.4136	0.4225	0.47202	0.50993	0.50637	0.48774	0.49678	0.54381	0.60184	0.66754	0.75572	0.86123	0.97322	1.0815	1.1752	1.2506	1.3075	1.3472	1.3747	1.3946	1.4107	1.4257	1.44	1.4533	1.4651	1.475	1.4825	1.4875	1.4897	1.4891	1.4862	1.4814	1.4754	1.4687	1.4618	1.4554	1.4502	1.4468	1.4451	1.4449	1.4458	1.4477	1.4503	1.4532	1.4562	1.459	1.4613	1.463	1.4636	1.463
0.41387	0.42292	0.47432	0.51378	0.51036	0.49124	0.50072	0.54936	0.60909	0.67582	0.76395	0.86849	0.97889	1.0853	1.1772	1.251	1.3066	1.3451	1.3715	1.3905	1.4059	1.4206	1.435	1.4485	1.4606	1.4708	1.4788	1.4841	1.4866	1.4862	1.4833	1.4786	1.4725	1.4657	1.4586	1.4521	1.4468	1.4432	1.4414	1.4412	1.4421	1.444	1.4466	1.4496	1.4527	1.4556	1.458	1.4597	1.4604	1.4599
0.41416	0.42336	0.47664	0.51768	0.51442	0.49485	0.50478	0.55507	0.61656	0.68435	0.77245	0.87601	0.98479	1.0893	1.1794	1.2516	1.3057	1.343	1.3683	1.3864	1.4012	1.4156	1.43	1.4437	1.4561	1.4667	1.4751	1.4808	1.4836	1.4833	1.4805	1.4758	1.4696	1.4626	1.4555	1.4488	1.4433	1.4396	1.4378	1.4375	1.4384	1.4403	1.443	1.446	1.4491	1.4521	1.4546	1.4564	1.4572	1.4567
0.41447	0.42382	0.47898	0.5216	0.51855	0.49857	0.50897	0.56092	0.62421	0.69313	0.78121	0.88376	0.99089	1.0935	1.1817	1.2523	1.305	1.341	1.3652	1.3824	1.3965	1.4107	1.425	1.4389	1.4517	1.4627	1.4714	1.4775	1.4806	1.4805	1.4777	1.473	1.4667	1.4596	1.4523	1.4455	1.4398	1.4361	1.4341	1.4338	1.4347	1.4366	1.4393	1.4424	1.4456	1.4486	1.4512	1.453	1.4539	1.4536
0.41479	0.42429	0.48134	0.52556	0.52275	0.50237	0.51327	0.56691	0.63203	0.70212	0.7902	0.89172	0.99718	1.0978	1.1841	1.2531	1.3044	1.3391	1.3622	1.3784	1.3919	1.4058	1.4201	1.4342	1.4472	1.4586	1.4678	1.4742	1.4776	1.4776	1.475	1.4702	1.4639	1.4567	1.4492	1.4422	1.4364	1.4325	1.4305	1.4301	1.431	1.4329	1.4356	1.4387	1.442	1.4451	1.4478	1.4497	1.4506	1.4504
0.41514	0.42478	0.4837	0.52953	0.52699	0.50626	0.51768	0.57301	0.64002	0.71133	0.7994	0.89989	1.0036	1.1022	1.1867	1.254	1.3038	1.3372	1.3592	1.3745	1.3874	1.4009	1.4152	1.4295	1.4428	1.4546	1.4641	1.4709	1.4746	1.4748	1.4722	1.4674	1.461	1.4537	1.4461	1.4389	1.433	1.429	1.4269	1.4264	1.4273	1.4292	1.4319	1.4351	1.4384	1.4416	1.4443	1.4463	1.4474	1.4472
0.4155	0.42528	0.48608	0.53352	0.53128	0.51023	0.52218	0.57923	0.64815	0.72071	0.8088	0.90823	1.0103	1.1068	1.1894	1.255	1.3034	1.3355	1.3563	1.3707	1.3829	1.3961	1.4104	1.4248	1.4385	1.4506	1.4605	1.4677	1.4716	1.472	1.4695	1.4647	1.4582	1.4507	1.4429	1.4356	1.4295	1.4254	1.4232	1.4227	1.4236	1.4255	1.4283	1.4315	1.4348	1.4381	1.4409	1.443	1.4441	1.4439
0.41587	0.42579	0.48845	0.53752	0.53561	0.51427	0.52678	0.58555	0.65641	0.73026	0.81836	0.91673	1.017	1.1116	1.1922	1.2561	1.303	1.3338	1.3535	1.3669	1.3784	1.3913	1.4056	1.4202	1.4342	1.4467	1.457	1.4645	1.4686	1.4692	1.4668	1.4619	1.4554	1.4478	1.4399	1.4324	1.4261	1.4219	1.4196	1.4191	1.4199	1.4219	1.4246	1.4279	1.4313	1.4346	1.4374	1.4396	1.4408	1.4407
0.41625	0.42631	0.49082	0.54151	0.53996	0.51837	0.53146	0.59196	0.66479	0.73996	0.82808	0.92537	1.0239	1.1164	1.1951	1.2573	1.3027	1.3322	1.3507	1.3632	1.374	1.3866	1.4008	1.4156	1.4299	1.4427	1.4534	1.4613	1.4657	1.4665	1.4641	1.4592	1.4526	1.4449	1.4368	1.4291	1.4227	1.4184	1.416	1.4154	1.4162	1.4182	1.4209	1.4242	1.4277	1.431	1.434	1.4362	1.4375	1.4375
0.41665	0.42684	0.49318	0.5455	0.54433	0.52252	0.53621	0.59846	0.67327	0.74978	0.83793	0.93412	1.0309	1.1213	1.198	1.2585	1.3024	1.3306	1.348	1.3595	1.3697	1.3819	1.3961	1.411	1.4256	1.4388	1.4499	1.4581	1.4628	1.4637	1.4614	1.4565	1.4498	1.442	1.4337	1.4259	1.4194	1.4149	1.4124	1.4118	1.4125	1.4145	1.4173	1.4206	1.4241	1.4275	1.4305	1.4328	1.4341	1.4342
0.41706	0.42737	0.49553	0.54948	0.54872	0.52672	0.54103	0.60502	0.68183	0.75971	0.84789	0.94298	1.0379	1.1263	1.201	1.2598	1.3022	1.3291	1.3453	1.3559	1.3654	1.3773	1.3914	1.4065	1.4214	1.435	1.4464	1.4549	1.4599	1.461	1.4587	1.4538	1.447	1.439	1.4307	1.4227	1.416	1.4114	1.4089	1.4081	1.4089	1.4108	1.4136	1.417	1.4206	1.424	1.4271	1.4294	1.4308	1.431
0.41748	0.42791	0.49786	0.55343	0.55311	0.53096	0.54591	0.61164	0.69047	0.76973	0.85794	0.95192	1.045	1.1313	1.2041	1.2612	1.3021	1.3276	1.3427	1.3523	1.3612	1.3728	1.3868	1.402	1.4172	1.4311	1.4429	1.4518	1.457	1.4582	1.456	1.4511	1.4442	1.4362	1.4276	1.4195	1.4126	1.4079	1.4053	1.4045	1.4053	1.4072	1.41	1.4134	1.417	1.4205	1.4236	1.4261	1.4275	1.4277
0.4179	0.42846	0.50018	0.55736	0.5575	0.53523	0.55084	0.61832	0.69916	0.77981	0.86805	0.96091	1.0522	1.1364	1.2072	1.2626	1.302	1.3262	1.3401	1.3488	1.357	1.3682	1.3822	1.3976	1.413	1.4273	1.4394	1.4486	1.4541	1.4555	1.4533	1.4484	1.4415	1.4333	1.4246	1.4163	1.4093	1.4045	1.4018	1.4009	1.4016	1.4036	1.4064	1.4098	1.4135	1.417	1.4202	1.4227	1.4242	1.4245
0.41833	0.429	0.50247	0.56125	0.56188	0.53953	0.55581	0.62503	0.7079	0.78995	0.87822	0.96995	1.0594	1.1415	1.2104	1.264	1.302	1.3249	1.3376	1.3454	1.3529	1.3638	1.3777	1.3932	1.4089	1.4235	1.436	1.4455	1.4513	1.4528	1.4507	1.4457	1.4387	1.4304	1.4216	1.4131	1.406	1.4011	1.3983	1.3974	1.398	1.4	1.4028	1.4062	1.4099	1.4135	1.4168	1.4193	1.4209	1.4212
0.41877	0.42955	0.50474	0.56511	0.56623	0.54384	0.56082	0.63178	0.71667	0.80012	0.88841	0.97901	1.0667	1.1467	1.2136	1.2655	1.302	1.3235	1.3352	1.342	1.3488	1.3594	1.3732	1.3889	1.4048	1.4197	1.4326	1.4424	1.4484	1.4501	1.448	1.4431	1.436	1.4275	1.4186	1.41	1.4027	1.3976	1.3948	1.3938	1.3945	1.3964	1.3992	1.4027	1.4064	1.4101	1.4134	1.416	1.4176	1.418
0.41921	0.43009	0.50697	0.56891	0.57056	0.54816	0.56585	0.63854	0.72544	0.8103	0.89861	0.98806	1.0739	1.1518	1.2168	1.267	1.302	1.3223	1.3328	1.3386	1.3448	1.355	1.3688	1.3846	1.4007	1.416	1.4292	1.4393	1.4456	1.4474	1.4454	1.4404	1.4333	1.4247	1.4156	1.4068	1.3994	1.3943	1.3913	1.3903	1.3909	1.3928	1.3957	1.3992	1.4029	1.4066	1.41	1.4126	1.4143	1.4148
0.41965	0.43064	0.50916	0.57266	0.57486	0.55248	0.5709	0.64531	0.73422	0.82048	0.90879	0.99711	1.0811	1.1569	1.22	1.2685	1.302	1.321	1.3304	1.3353	1.3408	1.3507	1.3644	1.3803	1.3967	1.4123	1.4258	1.4362	1.4427	1.4447	1.4427	1.4378	1.4305	1.4219	1.4126	1.4037	1.3962	1.3909	1.3879	1.3868	1.3874	1.3893	1.3921	1.3957	1.3994	1.4032	1.4066	1.4093	1.411	1.4115
0.4201	0.43118	0.51132	0.57635	0.57911	0.5568	0.57596	0.65208	0.74298	0.83063	0.91894	1.0061	1.0883	1.162	1.2232	1.27	1.3021	1.3198	1.3281	1.3321	1.3369	1.3464	1.3601	1.3761	1.3927	1.4086	1.4224	1.4332	1.4399	1.442	1.4401	1.4351	1.4278	1.419	1.4096	1.4006	1.3929	1.3876	1.3844	1.3833	1.3839	1.3858	1.3886	1.3922	1.396	1.3998	1.4032	1.406	1.4078	1.4084
0.42054	0.43171	0.51343	0.57997	0.58331	0.5611	0.58102	0.65884	0.75171	0.84073	0.92904	1.0151	1.0954	1.1671	1.2263	1.2715	1.3022	1.3187	1.3258	1.3289	1.3331	1.3422	1.3558	1.3719	1.3888	1.4049	1.4191	1.4301	1.437	1.4393	1.4374	1.4324	1.4251	1.4162	1.4067	1.3975	1.3897	1.3842	1.381	1.3799	1.3804	1.3823	1.3852	1.3887	1.3926	1.3964	1.3999	1.4027	1.4046	1.4052
0.42098	0.43224	0.51549	0.58351	0.58746	0.56538	0.58608	0.66558	0.7604	0.85078	0.93906	1.0239	1.1025	1.1721	1.2295	1.273	1.3023	1.3175	1.3235	1.3257	1.3293	1.3381	1.3516	1.3677	1.3848	1.4013	1.4157	1.427	1.4342	1.4366	1.4348	1.4298	1.4224	1.4134	1.4037	1.3944	1.3865	1.3809	1.3777	1.3765	1.377	1.3788	1.3817	1.3853	1.3892	1.3931	1.3966	1.3995	1.4014	1.402
0.42142	0.43276	0.5175	0.58697	0.59153	0.56962	0.59112	0.67228	0.76903	0.86073	0.94899	1.0327	1.1095	1.1771	1.2326	1.2745	1.3024	1.3164	1.3213	1.3227	1.3255	1.334	1.3474	1.3637	1.381	1.3977	1.4124	1.424	1.4314	1.4339	1.4322	1.4271	1.4196	1.4106	1.4008	1.3914	1.3834	1.3777	1.3743	1.3731	1.3736	1.3754	1.3783	1.3819	1.3859	1.3898	1.3934	1.3963	1.3982	1.3989
0.42186	0.43327	0.51945	0.59035	0.59554	0.57383	0.59614	0.67895	0.77758	0.87059	0.9588	1.0414	1.1164	1.182	1.2356	1.276	1.3025	1.3153	1.3192	1.3196	1.3219	1.33	1.3433	1.3596	1.3771	1.3941	1.4091	1.421	1.4286	1.4312	1.4295	1.4245	1.4169	1.4078	1.3979	1.3883	1.3802	1.3744	1.371	1.3697	1.3702	1.3721	1.375	1.3786	1.3825	1.3865	1.3901	1.3931	1.3951	1.3958
0.42229	0.43376	0.52134	0.59363	0.59946	0.578	0.60112	0.68556	0.78604	0.88033	0.96847	1.0499	1.1231	1.1868	1.2386	1.2774	1.3025	1.3142	1.317	1.3166	1.3182	1.326	1.3392	1.3556	1.3733	1.3905	1.4058	1.4179	1.4257	1.4285	1.4269	1.4218	1.4142	1.405	1.395	1.3853	1.3771	1.3712	1.3678	1.3664	1.3669	1.3687	1.3716	1.3753	1.3793	1.3833	1.3869	1.3899	1.392	1.3928
0.42271	0.43425	0.52316	0.5968	0.60329	0.58211	0.60607	0.6921	0.7944	0.88992	0.97799	1.0582	1.1297	1.1915	1.2415	1.2788	1.3026	1.3131	1.3149	1.3137	1.3147	1.3221	1.3352	1.3517	1.3695	1.387	1.4025	1.4149	1.4229	1.4258	1.4242	1.4192	1.4115	1.4022	1.3921	1.3823	1.374	1.3681	1.3645	1.3632	1.3636	1.3654	1.3684	1.372	1.376	1.3801	1.3838	1.3868	1.3889	1.3898
0.42313	0.43472	0.52491	0.59987	0.60702	0.58616	0.61098	0.69857	0.80264	0.89936	0.98733	1.0664	1.1362	1.196	1.2443	1.2801	1.3027	1.312	1.3129	1.3108	1.3112	1.3183	1.3312	1.3478	1.3658	1.3835	1.3993	1.4119	1.4201	1.423	1.4215	1.4165	1.4088	1.3994	1.3892	1.3794	1.3709	1.3649	1.3613	1.3599	1.3603	1.3622	1.3651	1.3688	1.3729	1.3769	1.3807	1.3838	1.3859	1.3868
0.42353	0.43518	0.52659	0.60281	0.61064	0.59015	0.61582	0.70496	0.81074	0.90862	0.99647	1.0744	1.1425	1.2005	1.2471	1.2814	1.3027	1.3109	1.3108	1.3079	1.3077	1.3145	1.3273	1.3439	1.3621	1.38	1.396	1.4089	1.4172	1.4203	1.4189	1.4138	1.4061	1.3966	1.3864	1.3764	1.3679	1.3618	1.3582	1.3567	1.3571	1.359	1.3619	1.3656	1.3697	1.3738	1.3776	1.3808	1.3829	1.3839
0.42393	0.43562	0.52819	0.60564	0.61416	0.59405	0.62061	0.71126	0.8187	0.91768	1.0054	1.0822	1.1486	1.2047	1.2497	1.2826	1.3027	1.3098	1.3088	1.3051	1.3043	1.3108	1.3235	1.3401	1.3584	1.3765	1.3928	1.4058	1.4144	1.4176	1.4162	1.4111	1.4034	1.3938	1.3835	1.3735	1.3649	1.3587	1.3551	1.3536	1.354	1.3558	1.3588	1.3625	1.3666	1.3708	1.3746	1.3778	1.38	1.381
0.42431	0.43604	0.52971	0.60833	0.61754	0.59788	0.62532	0.71745	0.8265	0.92652	1.0141	1.0898	1.1545	1.2089	1.2522	1.2837	1.3026	1.3087	1.3068	1.3023	1.301	1.3071	1.3197	1.3363	1.3548	1.3731	1.3896	1.4028	1.4115	1.4148	1.4135	1.4084	1.4007	1.3911	1.3807	1.3705	1.3619	1.3557	1.352	1.3505	1.3508	1.3527	1.3557	1.3595	1.3636	1.3678	1.3716	1.3749	1.3771	1.3782
0.42468	0.43645	0.53114	0.61089	0.62081	0.60161	0.62996	0.72352	0.83412	0.93514	1.0225	1.0971	1.1602	1.2128	1.2546	1.2848	1.3025	1.3076	1.3048	1.2996	1.2977	1.3035	1.316	1.3326	1.3512	1.3697	1.3864	1.3998	1.4087	1.4121	1.4108	1.4057	1.3979	1.3883	1.3778	1.3676	1.3589	1.3527	1.3489	1.3474	1.3478	1.3497	1.3527	1.3564	1.3606	1.3648	1.3687	1.372	1.3743	1.3754
0.42504	0.43683	0.53249	0.61332	0.62394	0.60526	0.63452	0.72949	0.84157	0.94352	1.0307	1.1041	1.1657	1.2166	1.2568	1.2858	1.3024	1.3065	1.3028	1.2969	1.2945	1.3	1.3123	1.329	1.3477	1.3663	1.3832	1.3968	1.4058	1.4093	1.4081	1.403	1.3952	1.3855	1.375	1.3647	1.356	1.3497	1.3459	1.3444	1.3448	1.3467	1.3497	1.3535	1.3577	1.3619	1.3659	1.3692	1.3716	1.3727
0.42538	0.4372	0.53376	0.61561	0.62695	0.60881	0.639	0.73534	0.84884	0.95167	1.0386	1.1109	1.1709	1.2202	1.259	1.2867	1.3022	1.3054	1.3009	1.2943	1.2913	1.2965	1.3087	1.3254	1.3441	1.3629	1.38	1.3938	1.4029	1.4065	1.4053	1.4003	1.3925	1.3828	1.3722	1.3619	1.3531	1.3467	1.343	1.3414	1.3418	1.3437	1.3468	1.3506	1.3548	1.3591	1.3631	1.3664	1.3688	1.37
0.42572	0.43754	0.53494	0.61777	0.62983	0.61228	0.64341	0.74107	0.85595	0.95959	1.0462	1.1175	1.1759	1.2236	1.261	1.2875	1.302	1.3043	1.299	1.2917	1.2882	1.2931	1.3051	1.3218	1.3407	1.3596	1.3768	1.3908	1.4	1.4037	1.4026	1.3976	1.3897	1.38	1.3694	1.3591	1.3502	1.3438	1.3401	1.3385	1.3389	1.3408	1.3439	1.3477	1.352	1.3563	1.3604	1.3638	1.3662	1.3674
0.42603	0.43787	0.53604	0.6198	0.63259	0.61566	0.64774	0.7467	0.86288	0.96729	1.0537	1.1238	1.1808	1.2269	1.2629	1.2882	1.3018	1.3032	1.2971	1.2891	1.2851	1.2897	1.3016	1.3183	1.3372	1.3563	1.3736	1.3877	1.3972	1.4009	1.3998	1.3949	1.387	1.3772	1.3666	1.3562	1.3473	1.341	1.3372	1.3356	1.336	1.338	1.3411	1.345	1.3493	1.3536	1.3577	1.3611	1.3636	1.3648
0.42634	0.43818	0.53705	0.6217	0.63523	0.61896	0.65199	0.75222	0.86964	0.97476	1.0608	1.1299	1.1854	1.23	1.2646	1.2889	1.3015	1.3021	1.2952	1.2866	1.2822	1.2864	1.2982	1.3148	1.3338	1.353	1.3705	1.3847	1.3943	1.3981	1.3971	1.3921	1.3843	1.3745	1.3638	1.3534	1.3445	1.3381	1.3343	1.3328	1.3332	1.3352	1.3383	1.3422	1.3465	1.3509	1.355	1.3585	1.361	1.3623
0.42664	0.43847	0.53799	0.62348	0.63775	0.62217	0.65617	0.75763	0.87624	0.98202	1.0677	1.1357	1.1898	1.2329	1.2663	1.2894	1.3011	1.3009	1.2934	1.2842	1.2792	1.2832	1.2948	1.3114	1.3305	1.3497	1.3673	1.3817	1.3914	1.3953	1.3943	1.3894	1.3815	1.3718	1.3611	1.3507	1.3417	1.3353	1.3315	1.33	1.3304	1.3324	1.3356	1.3395	1.3439	1.3483	1.3525	1.356	1.3585	1.3599
0.42692	0.43874	0.53885	0.62513	0.64015	0.62529	0.66028	0.76294	0.88268	0.98906	1.0744	1.1413	1.194	1.2357	1.2678	1.29	1.3008	1.2998	1.2915	1.2817	1.2763	1.28	1.2915	1.3081	1.3271	1.3465	1.3642	1.3787	1.3884	1.3925	1.3915	1.3866	1.3788	1.369	1.3583	1.3479	1.3389	1.3326	1.3288	1.3273	1.3277	1.3297	1.3329	1.3369	1.3413	1.3458	1.3499	1.3535	1.3561	1.3574
0.42719	0.439	0.53964	0.62666	0.64243	0.62834	0.66431	0.76814	0.88895	0.99588	1.0809	1.1467	1.198	1.2383	1.2693	1.2904	1.3004	1.2986	1.2897	1.2793	1.2735	1.2769	1.2882	1.3047	1.3238	1.3432	1.3611	1.3757	1.3855	1.3896	1.3887	1.3839	1.376	1.3663	1.3556	1.3452	1.3362	1.3298	1.3261	1.3246	1.325	1.3271	1.3303	1.3343	1.3387	1.3432	1.3475	1.351	1.3537	1.3551
0.42745	0.43924	0.54035	0.62807	0.6446	0.6313	0.66827	0.77323	0.89507	1.0025	1.0871	1.1519	1.2018	1.2408	1.2706	1.2907	1.2999	1.2975	1.2879	1.277	1.2707	1.2738	1.285	1.3015	1.3206	1.34	1.358	1.3727	1.3826	1.3868	1.3859	1.3811	1.3733	1.3635	1.3529	1.3424	1.3335	1.3271	1.3234	1.3219	1.3224	1.3245	1.3277	1.3318	1.3362	1.3408	1.345	1.3486	1.3513	1.3528
0.4277	0.43946	0.54098	0.62937	0.64666	0.63418	0.67216	0.77822	0.90102	1.0089	1.0931	1.1568	1.2054	1.2431	1.2718	1.291	1.2994	1.2963	1.2861	1.2747	1.268	1.2708	1.2819	1.2982	1.3173	1.3369	1.3549	1.3697	1.3797	1.3839	1.3831	1.3783	1.3706	1.3608	1.3502	1.3397	1.3308	1.3245	1.3207	1.3193	1.3198	1.3219	1.3252	1.3293	1.3338	1.3384	1.3426	1.3463	1.349	1.3505
0.42793	0.43967	0.54154	0.63054	0.6486	0.63698	0.67599	0.78311	0.90682	1.0151	1.0989	1.1615	1.2088	1.2452	1.2729	1.2912	1.2989	1.2951	1.2844	1.2724	1.2653	1.2679	1.2788	1.2951	1.3142	1.3337	1.3518	1.3667	1.3768	1.3811	1.3803	1.3755	1.3678	1.3581	1.3475	1.3371	1.3282	1.3218	1.3181	1.3167	1.3173	1.3194	1.3227	1.3268	1.3314	1.336	1.3403	1.344	1.3467	1.3483
0.42816	0.43986	0.54203	0.6316	0.65044	0.63971	0.67974	0.78789	0.91246	1.0211	1.1044	1.166	1.2121	1.2473	1.2738	1.2914	1.2984	1.294	1.2826	1.2702	1.2627	1.265	1.2757	1.2919	1.311	1.3306	1.3487	1.3636	1.3738	1.3782	1.3775	1.3728	1.3651	1.3554	1.3448	1.3344	1.3255	1.3192	1.3156	1.3142	1.3148	1.3169	1.3203	1.3245	1.329	1.3337	1.338	1.3418	1.3445	1.3461
0.42837	0.44003	0.54245	0.63255	0.65217	0.64236	0.68342	0.79258	0.91795	1.0269	1.1097	1.1703	1.2151	1.2491	1.2747	1.2915	1.2978	1.2928	1.2809	1.268	1.2601	1.2622	1.2727	1.2888	1.3079	1.3275	1.3457	1.3606	1.3709	1.3753	1.3746	1.37	1.3623	1.3527	1.3421	1.3317	1.3229	1.3167	1.313	1.3117	1.3123	1.3145	1.3179	1.3221	1.3267	1.3314	1.3358	1.3396	1.3424	1.344
0.42858	0.44019	0.54279	0.63339	0.65379	0.64493	0.68703	0.79716	0.92329	1.0325	1.1148	1.1744	1.218	1.2508	1.2755	1.2915	1.2972	1.2916	1.2792	1.2658	1.2576	1.2594	1.2697	1.2858	1.3048	1.3244	1.3426	1.3577	1.368	1.3724	1.3718	1.3672	1.3596	1.35	1.3394	1.3291	1.3203	1.3141	1.3105	1.3092	1.3099	1.3122	1.3156	1.3198	1.3245	1.3292	1.3336	1.3374	1.3403	1.3419
0.42877	0.44033	0.54307	0.63412	0.65531	0.64742	0.69058	0.80165	0.92848	1.0379	1.1197	1.1783	1.2206	1.2524	1.2761	1.2914	1.2965	1.2904	1.2775	1.2637	1.2551	1.2566	1.2668	1.2828	1.3017	1.3214	1.3396	1.3547	1.365	1.3695	1.369	1.3644	1.3568	1.3473	1.3368	1.3265	1.3178	1.3116	1.3081	1.3068	1.3075	1.3098	1.3133	1.3176	1.3223	1.327	1.3315	1.3353	1.3382	1.3399
0.42895	0.44046	0.54329	0.63474	0.65673	0.64985	0.69406	0.80604	0.93352	1.0431	1.1243	1.1819	1.2231	1.2538	1.2767	1.2913	1.2958	1.2892	1.2759	1.2617	1.2527	1.254	1.264	1.2798	1.2987	1.3183	1.3366	1.3517	1.3621	1.3666	1.3661	1.3616	1.3541	1.3446	1.3341	1.3239	1.3153	1.3092	1.3057	1.3045	1.3052	1.3076	1.3111	1.3154	1.3201	1.3249	1.3294	1.3333	1.3362	1.3379
0.42913	0.44057	0.54343	0.63526	0.65805	0.65219	0.69748	0.81034	0.93842	1.0481	1.1288	1.1854	1.2255	1.2551	1.2772	1.2911	1.2951	1.288	1.2742	1.2596	1.2504	1.2514	1.2612	1.2769	1.2958	1.3153	1.3335	1.3487	1.3591	1.3637	1.3632	1.3588	1.3513	1.3419	1.3315	1.3214	1.3128	1.3067	1.3033	1.3021	1.3029	1.3053	1.3089	1.3132	1.318	1.3228	1.3274	1.3313	1.3342	1.3359
0.42929	0.44067	0.54351	0.63567	0.65926	0.65447	0.70083	0.81454	0.94318	1.0529	1.133	1.1886	1.2276	1.2563	1.2775	1.2909	1.2943	1.2868	1.2726	1.2576	1.248	1.2488	1.2585	1.274	1.2928	1.3123	1.3305	1.3457	1.3562	1.3608	1.3604	1.356	1.3486	1.3392	1.3289	1.3188	1.3103	1.3043	1.3009	1.2998	1.3007	1.3031	1.3067	1.3111	1.3159	1.3208	1.3254	1.3293	1.3323	1.334
0.42944	0.44076	0.54353	0.63598	0.66038	0.65668	0.70411	0.81865	0.94779	1.0575	1.1371	1.1917	1.2296	1.2573	1.2778	1.2905	1.2935	1.2856	1.271	1.2556	1.2458	1.2463	1.2558	1.2712	1.2899	1.3094	1.3276	1.3427	1.3532	1.3579	1.3575	1.3532	1.3458	1.3365	1.3263	1.3163	1.3078	1.3019	1.2986	1.2976	1.2985	1.301	1.3046	1.3091	1.3139	1.3188	1.3234	1.3274	1.3304	1.3322
0.42959	0.44083	0.54349	0.6362	0.6614	0.65882	0.70734	0.82267	0.95226	1.062	1.1409	1.1946	1.2314	1.2582	1.278	1.2902	1.2927	1.2843	1.2694	1.2537	1.2435	1.2438	1.2531	1.2684	1.287	1.3064	1.3246	1.3398	1.3503	1.355	1.3547	1.3504	1.3431	1.3339	1.3237	1.3138	1.3054	1.2996	1.2963	1.2954	1.2963	1.2989	1.3026	1.3071	1.312	1.3169	1.3215	1.3255	1.3285	1.3304
0.42972	0.44088	0.54338	0.63631	0.66233	0.66089	0.7105	0.82659	0.95659	1.0663	1.1446	1.1973	1.233	1.2589	1.278	1.2897	1.2919	1.2831	1.2678	1.2518	1.2413	1.2414	1.2505	1.2657	1.2842	1.3035	1.3216	1.3368	1.3473	1.3521	1.3518	1.3475	1.3403	1.3312	1.3211	1.3113	1.303	1.2973	1.2941	1.2932	1.2942	1.2968	1.3006	1.3051	1.31	1.315	1.3196	1.3237	1.3267	1.3286
0.42985	0.44093	0.54322	0.63633	0.66317	0.66289	0.7136	0.83043	0.96079	1.0704	1.148	1.1997	1.2345	1.2595	1.278	1.2892	1.291	1.2819	1.2663	1.25	1.2392	1.239	1.248	1.263	1.2813	1.3006	1.3187	1.3338	1.3444	1.3491	1.3489	1.3447	1.3376	1.3285	1.3186	1.3089	1.3006	1.295	1.2919	1.2911	1.2922	1.2948	1.2986	1.3032	1.3081	1.3131	1.3178	1.3219	1.325	1.3268
0.42996	0.44096	0.54299	0.63626	0.66392	0.66482	0.71663	0.83417	0.96486	1.0743	1.1513	1.202	1.2358	1.26	1.2779	1.2887	1.2901	1.2806	1.2647	1.2481	1.2371	1.2367	1.2454	1.2603	1.2786	1.2977	1.3158	1.3309	1.3414	1.3462	1.346	1.3419	1.3349	1.3259	1.316	1.3064	1.2983	1.2927	1.2897	1.289	1.2901	1.2928	1.2967	1.3013	1.3063	1.3113	1.316	1.3201	1.3232	1.3252
0.43007	0.44098	0.54271	0.63609	0.66458	0.66669	0.71961	0.83783	0.96879	1.078	1.1544	1.2042	1.237	1.2604	1.2777	1.2881	1.2891	1.2794	1.2632	1.2463	1.2351	1.2344	1.243	1.2577	1.2758	1.2949	1.3129	1.3279	1.3385	1.3433	1.3431	1.3391	1.3321	1.3233	1.3135	1.304	1.296	1.2905	1.2876	1.2869	1.2881	1.2909	1.2948	1.2994	1.3045	1.3096	1.3143	1.3184	1.3216	1.3235
0.43017	0.44098	0.54238	0.63583	0.66515	0.6685	0.72253	0.8414	0.97259	1.0816	1.1573	1.2061	1.238	1.2607	1.2775	1.2874	1.2882	1.2782	1.2617	1.2446	1.2331	1.2322	1.2406	1.2551	1.2731	1.2921	1.31	1.325	1.3355	1.3404	1.3403	1.3363	1.3294	1.3206	1.311	1.3016	1.2937	1.2883	1.2854	1.2849	1.2862	1.289	1.2929	1.2976	1.3027	1.3078	1.3126	1.3168	1.3199	1.3219
0.43026	0.44098	0.54198	0.63548	0.66563	0.67024	0.72539	0.84489	0.97626	1.085	1.16	1.2079	1.2388	1.2608	1.2771	1.2867	1.2872	1.2769	1.2602	1.2428	1.2311	1.23	1.2382	1.2526	1.2704	1.2893	1.3071	1.3221	1.3326	1.3374	1.3374	1.3335	1.3267	1.318	1.3085	1.2992	1.2914	1.2861	1.2834	1.2829	1.2842	1.2871	1.2911	1.2959	1.301	1.3062	1.311	1.3151	1.3183	1.3203
0.43034	0.44096	0.54154	0.63505	0.66603	0.67192	0.72819	0.84829	0.97981	1.0883	1.1625	1.2095	1.2395	1.2608	1.2766	1.2859	1.2861	1.2757	1.2587	1.2411	1.2292	1.2279	1.2359	1.2501	1.2677	1.2865	1.3042	1.3191	1.3296	1.3345	1.3345	1.3307	1.324	1.3154	1.306	1.2968	1.2891	1.284	1.2813	1.2809	1.2824	1.2853	1.2894	1.2942	1.2993	1.3045	1.3094	1.3136	1.3168	1.3188
0.43041	0.44093	0.54104	0.63454	0.66635	0.67354	0.73094	0.8516	0.98323	1.0913	1.1648	1.2109	1.2401	1.2607	1.2761	1.2851	1.2851	1.2744	1.2573	1.2395	1.2273	1.2258	1.2336	1.2476	1.2651	1.2837	1.3013	1.3162	1.3267	1.3316	1.3316	1.3278	1.3213	1.3128	1.3035	1.2945	1.2869	1.2818	1.2793	1.279	1.2805	1.2835	1.2876	1.2925	1.2977	1.3029	1.3078	1.312	1.3153	1.3173
0.43048	0.44089	0.54049	0.63394	0.66659	0.6751	0.73362	0.85484	0.98652	1.0943	1.167	1.2122	1.2405	1.2605	1.2755	1.2842	1.284	1.2732	1.2558	1.2379	1.2255	1.2238	1.2314	1.2452	1.2625	1.281	1.2985	1.3133	1.3237	1.3286	1.3287	1.325	1.3185	1.3102	1.301	1.2921	1.2847	1.2798	1.2773	1.2771	1.2787	1.2818	1.286	1.2909	1.2961	1.3014	1.3063	1.3105	1.3138	1.3159
0.43053	0.44083	0.53989	0.63326	0.66675	0.6766	0.73626	0.85799	0.9897	1.097	1.169	1.2133	1.2408	1.2602	1.2748	1.2833	1.2829	1.2719	1.2544	1.2363	1.2237	1.2218	1.2292	1.2428	1.26	1.2783	1.2957	1.3104	1.3208	1.3257	1.3258	1.3222	1.3158	1.3076	1.2986	1.2898	1.2825	1.2777	1.2754	1.2752	1.2769	1.2801	1.2843	1.2893	1.2945	1.2998	1.3048	1.309	1.3124	1.3145
0.43058	0.44077	0.53924	0.6325	0.66683	0.67804	0.73884	0.86107	0.99275	1.0996	1.1709	1.2142	1.2409	1.2597	1.274	1.2823	1.2818	1.2706	1.253	1.2347	1.222	1.2199	1.227	1.2405	1.2574	1.2756	1.2929	1.3075	1.3178	1.3228	1.3229	1.3194	1.3131	1.305	1.2961	1.2875	1.2804	1.2757	1.2735	1.2734	1.2752	1.2784	1.2827	1.2877	1.293	1.2983	1.3033	1.3076	1.311	1.3131
0.43063	0.4407	0.53854	0.63166	0.66684	0.67942	0.74136	0.86407	0.99569	1.1021	1.1725	1.215	1.2409	1.2592	1.2732	1.2813	1.2806	1.2694	1.2516	1.2332	1.2203	1.218	1.2249	1.2382	1.2549	1.2729	1.2901	1.3046	1.3149	1.3198	1.32	1.3166	1.3104	1.3025	1.2937	1.2852	1.2782	1.2737	1.2716	1.2716	1.2735	1.2768	1.2811	1.2862	1.2916	1.2969	1.3019	1.3062	1.3096	1.3117
0.43066	0.44062	0.5378	0.63075	0.66677	0.68075	0.74383	0.86698	0.99852	1.1044	1.174	1.2156	1.2408	1.2586	1.2722	1.2802	1.2795	1.2681	1.2502	1.2316	1.2186	1.2161	1.2229	1.2359	1.2525	1.2703	1.2873	1.3017	1.312	1.3169	1.3172	1.3138	1.3077	1.2999	1.2913	1.283	1.2761	1.2717	1.2697	1.2699	1.2718	1.2752	1.2796	1.2847	1.2901	1.2955	1.3005	1.3049	1.3083	1.3104
0.43069	0.44052	0.53701	0.62976	0.66664	0.68203	0.74625	0.86983	1.0012	1.1065	1.1754	1.2161	1.2405	1.2578	1.2712	1.2791	1.2783	1.2668	1.2489	1.2302	1.217	1.2143	1.2208	1.2336	1.25	1.2677	1.2845	1.2988	1.309	1.314	1.3143	1.311	1.3051	1.2974	1.2889	1.2808	1.274	1.2697	1.2679	1.2681	1.2702	1.2736	1.2781	1.2832	1.2887	1.2941	1.2992	1.3036	1.307	1.3092
0.43071	0.44042	0.53617	0.62871	0.66643	0.68325	0.74861	0.87259	1.0038	1.1086	1.1766	1.2164	1.2401	1.257	1.2702	1.2779	1.2771	1.2656	1.2475	1.2287	1.2154	1.2125	1.2189	1.2314	1.2476	1.2651	1.2818	1.296	1.3061	1.311	1.3114	1.3082	1.3024	1.2948	1.2865	1.2785	1.272	1.2678	1.2661	1.2665	1.2686	1.2721	1.2766	1.2818	1.2873	1.2928	1.2979	1.3023	1.3057	1.3079
0.43073	0.44031	0.5353	0.62758	0.66615	0.68442	0.75093	0.87528	1.0063	1.1104	1.1776	1.2166	1.2396	1.256	1.269	1.2767	1.2758	1.2643	1.2462	1.2273	1.2138	1.2108	1.2169	1.2293	1.2452	1.2625	1.279	1.2931	1.3032	1.3081	1.3085	1.3054	1.2997	1.2923	1.2842	1.2763	1.2699	1.2659	1.2643	1.2648	1.267	1.2706	1.2752	1.2805	1.286	1.2915	1.2966	1.301	1.3045	1.3067
0.43073	0.44019	0.53438	0.62639	0.66581	0.68554	0.7532	0.8779	1.0087	1.1122	1.1785	1.2166	1.2389	1.255	1.2678	1.2754	1.2746	1.263	1.2449	1.2259	1.2123	1.2091	1.215	1.2271	1.2429	1.2599	1.2763	1.2903	1.3003	1.3052	1.3056	1.3026	1.297	1.2898	1.2818	1.2742	1.2679	1.2641	1.2626	1.2632	1.2655	1.2692	1.2738	1.2791	1.2847	1.2902	1.2954	1.2998	1.3033	1.3056
0.43073	0.44006	0.53342	0.62513	0.6654	0.68661	0.75541	0.88045	1.011	1.1138	1.1792	1.2165	1.2382	1.2539	1.2665	1.2741	1.2733	1.2617	1.2436	1.2246	1.2108	1.2075	1.2132	1.2251	1.2406	1.2574	1.2736	1.2875	1.2974	1.3023	1.3028	1.2998	1.2944	1.2873	1.2795	1.272	1.2659	1.2622	1.2609	1.2616	1.264	1.2677	1.2725	1.2778	1.2835	1.289	1.2942	1.2987	1.3022	1.3044
0.43073	0.43992	0.53242	0.6238	0.66493	0.68763	0.75758	0.88292	1.0131	1.1152	1.1798	1.2163	1.2373	1.2526	1.2652	1.2728	1.272	1.2605	1.2423	1.2232	1.2094	1.2059	1.2113	1.223	1.2383	1.2549	1.2709	1.2846	1.2945	1.2994	1.2999	1.2971	1.2917	1.2848	1.2772	1.2698	1.2639	1.2604	1.2592	1.26	1.2625	1.2663	1.2711	1.2766	1.2822	1.2878	1.293	1.2975	1.301	1.3033
0.43072	0.43978	0.53139	0.62242	0.66439	0.6886	0.7597	0.88533	1.0152	1.1166	1.1803	1.2159	1.2363	1.2513	1.2638	1.2714	1.2707	1.2592	1.241	1.2219	1.208	1.2043	1.2095	1.221	1.236	1.2524	1.2682	1.2818	1.2916	1.2964	1.297	1.2943	1.2891	1.2823	1.2748	1.2677	1.262	1.2586	1.2575	1.2585	1.2611	1.265	1.2699	1.2753	1.281	1.2867	1.2919	1.2964	1.2999	1.3023
0.4307	0.43962	0.53032	0.62097	0.6638	0.68952	0.76177	0.88767	1.0172	1.1178	1.1806	1.2154	1.2352	1.2499	1.2623	1.27	1.2693	1.2579	1.2398	1.2206	1.2066	1.2028	1.2078	1.219	1.2338	1.2499	1.2656	1.279	1.2887	1.2935	1.2942	1.2915	1.2864	1.2798	1.2726	1.2656	1.2601	1.2568	1.2559	1.257	1.2597	1.2637	1.2686	1.2741	1.2799	1.2855	1.2908	1.2953	1.2989	1.3012
0.43068	0.43946	0.52921	0.61946	0.66315	0.6904	0.7638	0.88994	1.019	1.1188	1.1808	1.2148	1.2339	1.2484	1.2608	1.2685	1.268	1.2566	1.2385	1.2194	1.2053	1.2013	1.2061	1.217	1.2316	1.2475	1.2629	1.2762	1.2858	1.2906	1.2913	1.2887	1.2838	1.2774	1.2703	1.2635	1.2582	1.2551	1.2543	1.2555	1.2583	1.2624	1.2674	1.273	1.2788	1.2844	1.2897	1.2943	1.2979	1.3002
0.43066	0.43929	0.52807	0.6179	0.66244	0.69123	0.76578	0.89214	1.0208	1.1198	1.1809	1.214	1.2326	1.2469	1.2592	1.2671	1.2666	1.2553	1.2373	1.2182	1.204	1.1998	1.2044	1.2151	1.2294	1.2451	1.2603	1.2734	1.2829	1.2877	1.2885	1.286	1.2812	1.2749	1.268	1.2614	1.2563	1.2534	1.2527	1.254	1.257	1.2611	1.2662	1.2718	1.2777	1.2834	1.2887	1.2933	1.2969	1.2993
0.43062	0.43912	0.52689	0.61629	0.66168	0.69202	0.76772	0.89428	1.0225	1.1206	1.1808	1.2131	1.2312	1.2452	1.2576	1.2655	1.2652	1.2541	1.2361	1.217	1.2027	1.1984	1.2028	1.2132	1.2272	1.2427	1.2577	1.2707	1.2801	1.2848	1.2856	1.2832	1.2786	1.2725	1.2658	1.2594	1.2544	1.2517	1.2512	1.2526	1.2556	1.2599	1.265	1.2707	1.2766	1.2824	1.2877	1.2923	1.2959	1.2983
0.43059	0.43894	0.52568	0.61462	0.66086	0.69277	0.76961	0.89635	1.024	1.1213	1.1806	1.2121	1.2296	1.2435	1.2559	1.264	1.2638	1.2528	1.2349	1.2158	1.2015	1.197	1.2012	1.2114	1.2251	1.2403	1.2551	1.2679	1.2772	1.282	1.2828	1.2805	1.276	1.27	1.2635	1.2574	1.2526	1.25	1.2497	1.2512	1.2544	1.2587	1.2639	1.2696	1.2756	1.2814	1.2867	1.2914	1.295	1.2974
0.43054	0.43875	0.52444	0.6129	0.65999	0.69347	0.77146	0.89836	1.0255	1.1219	1.1802	1.211	1.228	1.2417	1.2541	1.2624	1.2623	1.2515	1.2337	1.2146	1.2003	1.1957	1.1996	1.2095	1.223	1.2379	1.2525	1.2652	1.2744	1.2791	1.2799	1.2778	1.2734	1.2676	1.2613	1.2553	1.2508	1.2484	1.2482	1.2499	1.2531	1.2575	1.2628	1.2686	1.2746	1.2804	1.2858	1.2904	1.2941	1.2965
0.4305	0.43856	0.52318	0.61113	0.65907	0.69413	0.77327	0.90031	1.0269	1.1224	1.1798	1.2098	1.2263	1.2398	1.2523	1.2607	1.2609	1.2502	1.2325	1.2135	1.1991	1.1943	1.1981	1.2077	1.2209	1.2356	1.25	1.2624	1.2715	1.2762	1.2771	1.275	1.2708	1.2652	1.2591	1.2533	1.249	1.2468	1.2467	1.2485	1.2519	1.2564	1.2617	1.2676	1.2736	1.2795	1.2849	1.2895	1.2932	1.2957
0.43044	0.43836	0.52188	0.60932	0.65811	0.69476	0.77504	0.9022	1.0282	1.1228	1.1792	1.2085	1.2245	1.2378	1.2505	1.2591	1.2594	1.2489	1.2314	1.2124	1.198	1.1931	1.1966	1.206	1.2189	1.2333	1.2474	1.2597	1.2687	1.2734	1.2743	1.2723	1.2682	1.2628	1.2569	1.2514	1.2472	1.2452	1.2453	1.2472	1.2507	1.2553	1.2607	1.2666	1.2727	1.2785	1.284	1.2887	1.2924	1.2948
0.43039	0.43815	0.52056	0.60745	0.6571	0.69535	0.77676	0.90403	1.0295	1.1231	1.1785	1.207	1.2225	1.2358	1.2485	1.2574	1.258	1.2476	1.2302	1.2113	1.1969	1.1918	1.1951	1.2042	1.2169	1.231	1.2449	1.257	1.2659	1.2705	1.2715	1.2696	1.2657	1.2604	1.2547	1.2494	1.2454	1.2436	1.2439	1.2459	1.2495	1.2542	1.2597	1.2656	1.2717	1.2777	1.2831	1.2879	1.2916	1.294
0.43033	0.43794	0.51921	0.60555	0.65604	0.69589	0.77845	0.9058	1.0306	1.1232	1.1778	1.2055	1.2205	1.2337	1.2466	1.2556	1.2565	1.2464	1.2291	1.2103	1.1958	1.1906	1.1937	1.2025	1.2149	1.2287	1.2424	1.2543	1.263	1.2677	1.2687	1.2669	1.2631	1.2581	1.2526	1.2475	1.2437	1.242	1.2425	1.2447	1.2484	1.2531	1.2587	1.2647	1.2709	1.2768	1.2823	1.287	1.2908	1.2933
0.43026	0.43773	0.51783	0.6036	0.65494	0.69641	0.7801	0.90751	1.0317	1.1233	1.1769	1.2038	1.2184	1.2316	1.2446	1.2539	1.255	1.2451	1.228	1.2092	1.1947	1.1894	1.1923	1.2009	1.2129	1.2265	1.2399	1.2516	1.2602	1.2648	1.2659	1.2642	1.2606	1.2557	1.2504	1.2455	1.242	1.2405	1.2411	1.2435	1.2472	1.2521	1.2578	1.2638	1.27	1.276	1.2815	1.2863	1.29	1.2925
0.4302	0.43751	0.51644	0.60162	0.6538	0.69688	0.7817	0.90917	1.0326	1.1232	1.1758	1.2021	1.2163	1.2293	1.2425	1.2521	1.2535	1.2438	1.2269	1.2082	1.1937	1.1883	1.1909	1.1992	1.211	1.2243	1.2374	1.2489	1.2575	1.262	1.2631	1.2615	1.258	1.2534	1.2483	1.2436	1.2403	1.239	1.2398	1.2423	1.2461	1.2511	1.2568	1.263	1.2692	1.2752	1.2807	1.2855	1.2893	1.2918
0.43013	0.43728	0.51502	0.59959	0.65262	0.69733	0.78327	0.91077	1.0335	1.1231	1.1747	1.2002	1.214	1.2271	1.2405	1.2503	1.252	1.2425	1.2258	1.2072	1.1927	1.1872	1.1896	1.1976	1.2091	1.2221	1.235	1.2463	1.2547	1.2592	1.2603	1.2588	1.2555	1.251	1.2462	1.2417	1.2386	1.2375	1.2385	1.2411	1.2451	1.2501	1.2559	1.2621	1.2684	1.2744	1.28	1.2848	1.2886	1.2911
0.43005	0.43705	0.51358	0.59754	0.6514	0.69774	0.78481	0.91232	1.0343	1.1229	1.1735	1.1983	1.2117	1.2247	1.2383	1.2485	1.2504	1.2412	1.2247	1.2063	1.1918	1.1861	1.1883	1.196	1.2072	1.2199	1.2325	1.2436	1.2519	1.2564	1.2575	1.2562	1.253	1.2487	1.2441	1.2399	1.237	1.2361	1.2372	1.2399	1.244	1.2492	1.2551	1.2613	1.2676	1.2737	1.2793	1.2841	1.2879	1.2904
0.42997	0.43682	0.51212	0.59544	0.65015	0.69812	0.7863	0.91381	1.0351	1.1225	1.1722	1.1963	1.2093	1.2223	1.2362	1.2466	1.2489	1.24	1.2236	1.2053	1.1908	1.185	1.187	1.1945	1.2053	1.2177	1.2301	1.241	1.2491	1.2536	1.2548	1.2535	1.2505	1.2464	1.242	1.238	1.2353	1.2346	1.2359	1.2388	1.243	1.2483	1.2542	1.2605	1.2669	1.273	1.2786	1.2834	1.2872	1.2898
0.42989	0.43659	0.51064	0.59332	0.64886	0.69846	0.78777	0.91526	1.0358	1.1221	1.1708	1.1941	1.2068	1.2199	1.234	1.2447	1.2473	1.2387	1.2226	1.2044	1.1899	1.184	1.1857	1.1929	1.2035	1.2156	1.2277	1.2384	1.2464	1.2508	1.252	1.2509	1.248	1.2441	1.2399	1.2362	1.2337	1.2332	1.2346	1.2377	1.242	1.2474	1.2534	1.2597	1.2661	1.2723	1.2779	1.2828	1.2866	1.2892
0.42981	0.43635	0.50914	0.59116	0.64754	0.69878	0.78919	0.91665	1.0364	1.1216	1.1693	1.192	1.2043	1.2174	1.2317	1.2428	1.2458	1.2374	1.2215	1.2035	1.189	1.183	1.1845	1.1914	1.2017	1.2135	1.2253	1.2358	1.2437	1.248	1.2493	1.2483	1.2456	1.2419	1.2379	1.2344	1.2321	1.2318	1.2334	1.2366	1.2411	1.2465	1.2526	1.259	1.2654	1.2716	1.2773	1.2821	1.286	1.2886
0.42972	0.43611	0.50763	0.58898	0.64618	0.69907	0.79059	0.91799	1.0369	1.121	1.1678	1.1897	1.2017	1.2148	1.2294	1.2409	1.2442	1.2361	1.2205	1.2026	1.1882	1.182	1.1833	1.1899	1.1999	1.2114	1.2229	1.2332	1.2409	1.2452	1.2466	1.2456	1.2431	1.2396	1.2359	1.2326	1.2305	1.2304	1.2322	1.2355	1.2401	1.2457	1.2518	1.2583	1.2648	1.271	1.2767	1.2815	1.2854	1.288
0.42963	0.43587	0.5061	0.58676	0.6448	0.69933	0.79195	0.91929	1.0374	1.1204	1.1661	1.1873	1.199	1.2122	1.2271	1.2389	1.2426	1.2349	1.2195	1.2017	1.1874	1.1811	1.1822	1.1885	1.1981	1.2093	1.2206	1.2306	1.2382	1.2425	1.2439	1.243	1.2407	1.2374	1.2338	1.2308	1.229	1.2291	1.231	1.2345	1.2392	1.2448	1.2511	1.2576	1.2641	1.2704	1.2761	1.281	1.2848	1.2875
0.42954	0.43562	0.50456	0.58453	0.64339	0.69957	0.79328	0.92053	1.0378	1.1196	1.1644	1.1849	1.1962	1.2096	1.2248	1.237	1.241	1.2336	1.2184	1.2009	1.1866	1.1802	1.181	1.1871	1.1964	1.2073	1.2183	1.2281	1.2355	1.2398	1.2412	1.2404	1.2382	1.2351	1.2318	1.229	1.2274	1.2277	1.2299	1.2335	1.2383	1.244	1.2503	1.2569	1.2635	1.2698	1.2755	1.2804	1.2843	1.2869
0.42945	0.43537	0.503	0.58227	0.64196	0.69978	0.79457	0.92173	1.0381	1.1188	1.1625	1.1824	1.1935	1.2069	1.2224	1.235	1.2394	1.2323	1.2174	1.2	1.1858	1.1793	1.1799	1.1857	1.1947	1.2052	1.216	1.2256	1.2329	1.237	1.2385	1.2379	1.2358	1.2329	1.2298	1.2273	1.2259	1.2264	1.2287	1.2325	1.2374	1.2432	1.2496	1.2563	1.2629	1.2692	1.2749	1.2799	1.2838	1.2864
0.42935	0.43512	0.50144	0.57999	0.6405	0.69996	0.79584	0.92289	1.0384	1.1179	1.1606	1.1798	1.1906	1.2041	1.22	1.233	1.2378	1.2311	1.2164	1.1992	1.185	1.1784	1.1789	1.1843	1.193	1.2032	1.2137	1.223	1.2302	1.2343	1.2358	1.2353	1.2334	1.2307	1.2279	1.2255	1.2244	1.2251	1.2276	1.2315	1.2366	1.2425	1.2489	1.2556	1.2623	1.2686	1.2744	1.2794	1.2833	1.2859
0.42926	0.43487	0.49986	0.57769	0.63901	0.70012	0.79708	0.924	1.0386	1.1169	1.1587	1.1772	1.1877	1.2014	1.2176	1.231	1.2362	1.2298	1.2155	1.1984	1.1843	1.1776	1.1778	1.183	1.1913	1.2012	1.2114	1.2205	1.2276	1.2316	1.2331	1.2327	1.231	1.2285	1.2259	1.2238	1.2229	1.2239	1.2265	1.2306	1.2357	1.2418	1.2483	1.255	1.2617	1.2681	1.2739	1.2789	1.2828	1.2855
0.42916	0.43462	0.49828	0.57538	0.63751	0.70026	0.79829	0.92507	1.0387	1.1159	1.1566	1.1745	1.1847	1.1985	1.2151	1.229	1.2346	1.2285	1.2145	1.1977	1.1836	1.1768	1.1768	1.1816	1.1896	1.1993	1.2091	1.218	1.2249	1.2289	1.2305	1.2302	1.2286	1.2264	1.224	1.2221	1.2215	1.2226	1.2254	1.2296	1.2349	1.241	1.2476	1.2544	1.2612	1.2676	1.2734	1.2784	1.2823	1.285
0.42906	0.43437	0.49669	0.57305	0.63599	0.70038	0.79947	0.9261	1.0388	1.1147	1.1545	1.1717	1.1817	1.1957	1.2126	1.2269	1.233	1.2273	1.2135	1.1969	1.1829	1.176	1.1758	1.1803	1.188	1.1973	1.2069	1.2156	1.2223	1.2263	1.2278	1.2277	1.2263	1.2242	1.2221	1.2204	1.22	1.2214	1.2244	1.2287	1.2341	1.2403	1.247	1.2539	1.2607	1.2671	1.2729	1.2779	1.2819	1.2846
0.42896	0.43411	0.49509	0.5707	0.63445	0.70048	0.80062	0.92709	1.0389	1.1136	1.1523	1.1689	1.1787	1.1928	1.2101	1.2249	1.2313	1.226	1.2126	1.1962	1.1822	1.1752	1.1748	1.1791	1.1864	1.1954	1.2047	1.2131	1.2197	1.2236	1.2252	1.2252	1.2239	1.2221	1.2202	1.2188	1.2186	1.2201	1.2233	1.2278	1.2334	1.2397	1.2464	1.2533	1.2602	1.2666	1.2725	1.2775	1.2815	1.2842
0.42885	0.43386	0.49348	0.56835	0.63289	0.70056	0.80174	0.92803	1.0389	1.1123	1.1501	1.1661	1.1756	1.1899	1.2076	1.2228	1.2297	1.2248	1.2116	1.1954	1.1815	1.1745	1.1738	1.1778	1.1848	1.1935	1.2025	1.2107	1.2171	1.221	1.2226	1.2227	1.2216	1.22	1.2183	1.2171	1.2172	1.2189	1.2223	1.2269	1.2326	1.239	1.2458	1.2528	1.2597	1.2662	1.272	1.2771	1.281	1.2838
0.42875	0.43361	0.49187	0.56598	0.63132	0.70062	0.80284	0.92894	1.0388	1.111	1.1478	1.1631	1.1725	1.187	1.2051	1.2207	1.2281	1.2235	1.2107	1.1947	1.1809	1.1738	1.1729	1.1766	1.1833	1.1916	1.2003	1.2083	1.2145	1.2183	1.22	1.2202	1.2193	1.2178	1.2164	1.2155	1.2158	1.2178	1.2213	1.2261	1.2319	1.2384	1.2453	1.2523	1.2592	1.2657	1.2716	1.2767	1.2807	1.2834
0.42865	0.43335	0.49026	0.56361	0.62974	0.70066	0.80392	0.92982	1.0387	1.1097	1.1455	1.1602	1.1693	1.184	1.2025	1.2186	1.2264	1.2223	1.2098	1.194	1.1803	1.1731	1.172	1.1754	1.1818	1.1897	1.1981	1.2059	1.212	1.2157	1.2175	1.2177	1.217	1.2158	1.2146	1.2139	1.2144	1.2166	1.2203	1.2253	1.2312	1.2378	1.2447	1.2518	1.2588	1.2653	1.2712	1.2763	1.2803	1.283
0.42854	0.4331	0.48865	0.56123	0.62815	0.70069	0.80497	0.93065	1.0386	1.1083	1.1431	1.1572	1.1661	1.181	1.1999	1.2165	1.2248	1.2211	1.2089	1.1933	1.1797	1.1724	1.1711	1.1742	1.1802	1.1879	1.196	1.2035	1.2094	1.2131	1.2149	1.2153	1.2147	1.2137	1.2127	1.2123	1.2131	1.2155	1.2193	1.2244	1.2305	1.2372	1.2442	1.2514	1.2583	1.2649	1.2709	1.2759	1.2799	1.2827
0.42844	0.43285	0.48704	0.55884	0.62655	0.70071	0.80599	0.93146	1.0384	1.1068	1.1406	1.1541	1.1628	1.178	1.1973	1.2144	1.2231	1.2198	1.208	1.1927	1.1791	1.1718	1.1702	1.1731	1.1788	1.1861	1.1939	1.2011	1.2069	1.2106	1.2124	1.2128	1.2124	1.2116	1.2109	1.2107	1.2117	1.2143	1.2184	1.2236	1.2298	1.2366	1.2437	1.2509	1.2579	1.2645	1.2705	1.2756	1.2796	1.2824
0.42833	0.4326	0.48543	0.55646	0.62494	0.70071	0.80699	0.93222	1.0381	1.1053	1.1381	1.151	1.1596	1.1749	1.1947	1.2123	1.2215	1.2186	1.2071	1.192	1.1786	1.1711	1.1694	1.1719	1.1773	1.1843	1.1918	1.1988	1.2044	1.208	1.2098	1.2104	1.2102	1.2096	1.2091	1.2092	1.2104	1.2132	1.2175	1.2229	1.2291	1.236	1.2432	1.2505	1.2575	1.2642	1.2702	1.2753	1.2793	1.2821
0.42823	0.43235	0.48382	0.55407	0.62333	0.70069	0.80798	0.93296	1.0378	1.1038	1.1356	1.1479	1.1563	1.1719	1.1921	1.2102	1.2199	1.2174	1.2062	1.1914	1.178	1.1705	1.1686	1.1708	1.1758	1.1825	1.1897	1.1965	1.2019	1.2055	1.2073	1.208	1.208	1.2076	1.2073	1.2077	1.2091	1.2121	1.2165	1.2221	1.2285	1.2355	1.2427	1.25	1.2572	1.2638	1.2698	1.2749	1.279	1.2818
0.42812	0.43211	0.48221	0.55168	0.62171	0.70067	0.80894	0.93366	1.0375	1.1022	1.133	1.1448	1.153	1.1688	1.1895	1.2081	1.2182	1.2162	1.2054	1.1907	1.1775	1.1699	1.1678	1.1697	1.1744	1.1807	1.1876	1.1942	1.1995	1.2029	1.2049	1.2056	1.2057	1.2056	1.2055	1.2061	1.2078	1.211	1.2156	1.2213	1.2279	1.2349	1.2423	1.2496	1.2568	1.2635	1.2695	1.2746	1.2787	1.2815
0.42802	0.43186	0.48061	0.5493	0.62009	0.70064	0.80987	0.93434	1.0371	1.1006	1.1304	1.1416	1.1496	1.1657	1.1869	1.2059	1.2166	1.2149	1.2045	1.1901	1.177	1.1693	1.167	1.1686	1.173	1.179	1.1856	1.1919	1.197	1.2004	1.2024	1.2033	1.2035	1.2036	1.2038	1.2046	1.2066	1.21	1.2148	1.2206	1.2272	1.2344	1.2418	1.2493	1.2564	1.2632	1.2692	1.2744	1.2784	1.2812
0.42792	0.43162	0.47901	0.54693	0.61847	0.70059	0.81079	0.93498	1.0367	1.0989	1.1278	1.1383	1.1463	1.1626	1.1842	1.2038	1.2149	1.2137	1.2036	1.1895	1.1765	1.1688	1.1662	1.1676	1.1716	1.1773	1.1836	1.1896	1.1946	1.198	1.1999	1.2009	1.2014	1.2016	1.202	1.2031	1.2053	1.2089	1.2139	1.2199	1.2266	1.2339	1.2414	1.2489	1.2561	1.2629	1.2689	1.2741	1.2781	1.281
0.42781	0.43138	0.47742	0.54456	0.61685	0.70054	0.81169	0.9356	1.0363	1.0972	1.1251	1.1351	1.1429	1.1595	1.1816	1.2017	1.2133	1.2125	1.2028	1.1889	1.176	1.1682	1.1655	1.1666	1.1703	1.1756	1.1816	1.1874	1.1922	1.1955	1.1975	1.1986	1.1992	1.1996	1.2003	1.2017	1.2041	1.2079	1.213	1.2192	1.2261	1.2334	1.241	1.2485	1.2558	1.2626	1.2686	1.2738	1.2779	1.2807
0.42771	0.43114	0.47584	0.5422	0.61523	0.70048	0.81258	0.93619	1.0359	1.0955	1.1224	1.1318	1.1395	1.1564	1.1789	1.1995	1.2117	1.2113	1.202	1.1884	1.1755	1.1677	1.1648	1.1655	1.1689	1.1739	1.1796	1.1851	1.1898	1.1931	1.1951	1.1963	1.1971	1.1977	1.1986	1.2002	1.2029	1.2069	1.2122	1.2185	1.2255	1.2329	1.2406	1.2482	1.2555	1.2623	1.2684	1.2736	1.2777	1.2805
0.42761	0.43091	0.47427	0.53985	0.61362	0.70042	0.81344	0.93675	1.0354	1.0937	1.1197	1.1286	1.1361	1.1533	1.1763	1.1974	1.21	1.2101	1.2011	1.1878	1.1751	1.1672	1.1641	1.1645	1.1676	1.1722	1.1776	1.1829	1.1875	1.1906	1.1927	1.194	1.1949	1.1958	1.197	1.1988	1.2016	1.2059	1.2114	1.2178	1.2249	1.2325	1.2402	1.2478	1.2552	1.262	1.2681	1.2733	1.2774	1.2803
0.42751	0.43068	0.4727	0.53751	0.61202	0.70034	0.81429	0.93729	1.0348	1.0919	1.1169	1.1253	1.1327	1.1502	1.1737	1.1953	1.2084	1.2089	1.2003	1.1872	1.1747	1.1667	1.1634	1.1636	1.1663	1.1706	1.1757	1.1808	1.1851	1.1882	1.1903	1.1917	1.1928	1.1939	1.1953	1.1973	1.2005	1.2049	1.2106	1.2172	1.2244	1.232	1.2398	1.2475	1.2549	1.2618	1.2679	1.2731	1.2772	1.2801
0.42742	0.43045	0.47115	0.53519	0.61042	0.70027	0.81512	0.93781	1.0343	1.0901	1.1141	1.122	1.1293	1.1471	1.171	1.1932	1.2068	1.2078	1.1995	1.1867	1.1742	1.1662	1.1627	1.1626	1.165	1.169	1.1738	1.1786	1.1828	1.1859	1.188	1.1895	1.1907	1.192	1.1936	1.1959	1.1993	1.204	1.2098	1.2165	1.2239	1.2316	1.2394	1.2472	1.2546	1.2615	1.2677	1.2729	1.277	1.2799
0.42732	0.43023	0.46962	0.53289	0.60883	0.70019	0.81594	0.9383	1.0337	1.0882	1.1113	1.1187	1.1259	1.1439	1.1684	1.191	1.2051	1.2066	1.1987	1.1862	1.1738	1.1658	1.162	1.1617	1.1637	1.1674	1.1719	1.1765	1.1805	1.1835	1.1856	1.1873	1.1887	1.1902	1.192	1.1946	1.1981	1.203	1.209	1.2159	1.2233	1.2312	1.2391	1.2469	1.2544	1.2613	1.2674	1.2727	1.2768	1.2797
0.42723	0.43001	0.46809	0.5306	0.60726	0.70011	0.81674	0.93877	1.0331	1.0864	1.1085	1.1153	1.1225	1.1408	1.1657	1.1889	1.2035	1.2054	1.1979	1.1856	1.1734	1.1653	1.1614	1.1607	1.1625	1.1658	1.17	1.1743	1.1782	1.1812	1.1833	1.1851	1.1866	1.1883	1.1904	1.1932	1.197	1.2021	1.2082	1.2152	1.2228	1.2308	1.2388	1.2466	1.2541	1.2611	1.2672	1.2725	1.2766	1.2795
0.42713	0.4298	0.46659	0.52833	0.6057	0.70004	0.81753	0.93922	1.0325	1.0845	1.1057	1.112	1.1191	1.1377	1.1631	1.1868	1.2019	1.2042	1.1971	1.1851	1.173	1.1649	1.1608	1.1598	1.1612	1.1643	1.1681	1.1722	1.176	1.1788	1.1811	1.1829	1.1846	1.1865	1.1888	1.1918	1.1959	1.2011	1.2075	1.2146	1.2223	1.2304	1.2384	1.2463	1.2539	1.2608	1.267	1.2723	1.2765	1.2794
0.42704	0.42959	0.46509	0.52609	0.60415	0.69996	0.81831	0.93966	1.0319	1.0826	1.1029	1.1087	1.1157	1.1346	1.1605	1.1847	1.2003	1.2031	1.1963	1.1846	1.1726	1.1644	1.1601	1.1589	1.16	1.1627	1.1663	1.1702	1.1737	1.1765	1.1788	1.1807	1.1826	1.1847	1.1872	1.1905	1.1948	1.2002	1.2067	1.214	1.2219	1.23	1.2381	1.2461	1.2536	1.2606	1.2669	1.2721	1.2763	1.2792
0.42696	0.42939	0.46362	0.52387	0.60262	0.69988	0.81908	0.94007	1.0312	1.0807	1.1001	1.1054	1.1123	1.1315	1.1579	1.1826	1.1987	1.2019	1.1955	1.1841	1.1723	1.164	1.1595	1.1581	1.1588	1.1612	1.1645	1.1681	1.1715	1.1743	1.1765	1.1786	1.1806	1.1829	1.1857	1.1892	1.1937	1.1993	1.206	1.2135	1.2214	1.2296	1.2378	1.2458	1.2534	1.2604	1.2667	1.272	1.2761	1.2791
0.42687	0.42919	0.46217	0.52167	0.60111	0.6998	0.81983	0.94047	1.0305	1.0788	1.0973	1.1021	1.1089	1.1284	1.1553	1.1805	1.1971	1.2008	1.1948	1.1836	1.1719	1.1636	1.1589	1.1572	1.1577	1.1597	1.1627	1.1661	1.1693	1.172	1.1743	1.1765	1.1787	1.1811	1.1841	1.1879	1.1926	1.1985	1.2053	1.2129	1.2209	1.2292	1.2375	1.2455	1.2532	1.2602	1.2665	1.2718	1.276	1.2789
0.42679	0.429	0.46073	0.5195	0.59961	0.69973	0.82057	0.94085	1.0298	1.0769	1.0944	1.0988	1.1055	1.1254	1.1527	1.1785	1.1956	1.1997	1.194	1.1831	1.1716	1.1632	1.1584	1.1564	1.1565	1.1582	1.1609	1.1641	1.1672	1.1698	1.1721	1.1744	1.1767	1.1794	1.1826	1.1866	1.1915	1.1976	1.2046	1.2123	1.2205	1.2288	1.2372	1.2453	1.253	1.2601	1.2663	1.2717	1.2758	1.2788
0.42671	0.42882	0.45932	0.51737	0.59814	0.69966	0.82131	0.94122	1.0292	1.0749	1.0916	1.0955	1.1022	1.1223	1.1501	1.1764	1.194	1.1985	1.1932	1.1826	1.1712	1.1628	1.1578	1.1555	1.1554	1.1568	1.1592	1.1621	1.165	1.1676	1.17	1.1723	1.1748	1.1777	1.1811	1.1853	1.1905	1.1967	1.2039	1.2118	1.22	1.2285	1.2369	1.2451	1.2528	1.2599	1.2662	1.2715	1.2757	1.2787
0.42664	0.42864	0.45793	0.51526	0.5967	0.6996	0.82203	0.94157	1.0284	1.073	1.0888	1.0922	1.0988	1.1193	1.1475	1.1744	1.1924	1.1974	1.1925	1.1822	1.1709	1.1625	1.1573	1.1547	1.1542	1.1553	1.1575	1.1601	1.1629	1.1654	1.1678	1.1702	1.1729	1.176	1.1796	1.184	1.1894	1.1959	1.2032	1.2112	1.2196	1.2281	1.2366	1.2448	1.2526	1.2597	1.266	1.2714	1.2756	1.2785
0.42656	0.42847	0.45656	0.51319	0.59527	0.69955	0.82275	0.94192	1.0277	1.0711	1.086	1.0889	1.0955	1.1163	1.145	1.1723	1.1909	1.1963	1.1918	1.1817	1.1705	1.1621	1.1567	1.1539	1.1531	1.1539	1.1558	1.1582	1.1608	1.1633	1.1657	1.1682	1.171	1.1743	1.1782	1.1828	1.1884	1.1951	1.2026	1.2107	1.2192	1.2278	1.2364	1.2446	1.2524	1.2595	1.2659	1.2712	1.2754	1.2784
0.4265	0.4283	0.45522	0.51115	0.59388	0.6995	0.82346	0.94225	1.027	1.0692	1.0832	1.0857	1.0922	1.1133	1.1425	1.1703	1.1893	1.1952	1.191	1.1812	1.1702	1.1617	1.1562	1.1531	1.1521	1.1525	1.1541	1.1563	1.1588	1.1612	1.1636	1.1662	1.1692	1.1726	1.1767	1.1816	1.1874	1.1942	1.2019	1.2102	1.2188	1.2275	1.2361	1.2444	1.2522	1.2594	1.2657	1.2711	1.2753	1.2783
0.42643	0.42815	0.45391	0.50915	0.59251	0.69946	0.82416	0.94257	1.0263	1.0673	1.0804	1.0825	1.0889	1.1103	1.14	1.1683	1.1878	1.1941	1.1903	1.1808	1.1699	1.1614	1.1557	1.1523	1.151	1.1511	1.1524	1.1544	1.1567	1.1591	1.1615	1.1642	1.1674	1.171	1.1753	1.1804	1.1864	1.1934	1.2013	1.2096	1.2184	1.2271	1.2358	1.2442	1.252	1.2592	1.2656	1.271	1.2752	1.2782
0.42637	0.428	0.45262	0.50719	0.59118	0.69944	0.82486	0.94288	1.0256	1.0653	1.0777	1.0793	1.0857	1.1074	1.1375	1.1663	1.1863	1.193	1.1896	1.1803	1.1696	1.161	1.1552	1.1516	1.1499	1.1498	1.1508	1.1525	1.1547	1.157	1.1595	1.1623	1.1655	1.1694	1.1739	1.1792	1.1854	1.1926	1.2006	1.2091	1.218	1.2268	1.2356	1.244	1.2519	1.2591	1.2655	1.2708	1.2751	1.2781
0.42631	0.42785	0.45136	0.50527	0.58987	0.69942	0.82555	0.94318	1.0248	1.0635	1.0749	1.0761	1.0825	1.1045	1.135	1.1643	1.1848	1.1919	1.1888	1.1799	1.1693	1.1607	1.1547	1.1508	1.1489	1.1484	1.1492	1.1507	1.1527	1.155	1.1575	1.1604	1.1638	1.1678	1.1725	1.178	1.1845	1.1918	1.2	1.2086	1.2176	1.2265	1.2353	1.2438	1.2517	1.2589	1.2653	1.2707	1.275	1.278
0.42626	0.42772	0.45013	0.50339	0.5886	0.69942	0.82624	0.94348	1.0241	1.0616	1.0722	1.073	1.0793	1.1016	1.1326	1.1624	1.1833	1.1908	1.1881	1.1794	1.169	1.1604	1.1542	1.1501	1.1479	1.1471	1.1476	1.1489	1.1508	1.153	1.1555	1.1585	1.162	1.1662	1.1711	1.1769	1.1835	1.1911	1.1994	1.2081	1.2172	1.2262	1.2351	1.2436	1.2515	1.2588	1.2652	1.2706	1.2749	1.2779
0.42621	0.4276	0.44893	0.50156	0.58737	0.69943	0.82692	0.94377	1.0234	1.0597	1.0696	1.0699	1.0762	1.0988	1.1302	1.1604	1.1818	1.1898	1.1874	1.179	1.1687	1.16	1.1537	1.1494	1.1468	1.1458	1.146	1.1471	1.1489	1.151	1.1535	1.1566	1.1603	1.1646	1.1698	1.1757	1.1826	1.1903	1.1988	1.2077	1.2168	1.2259	1.2348	1.2434	1.2514	1.2587	1.2651	1.2705	1.2748	1.2778
0.42617	0.42748	0.44777	0.49977	0.58617	0.69945	0.82761	0.94406	1.0227	1.0579	1.0669	1.0668	1.0731	1.096	1.1278	1.1585	1.1803	1.1887	1.1867	1.1786	1.1684	1.1597	1.1532	1.1487	1.1459	1.1445	1.1445	1.1454	1.1469	1.149	1.1516	1.1547	1.1586	1.1631	1.1684	1.1746	1.1816	1.1896	1.1982	1.2072	1.2164	1.2256	1.2346	1.2432	1.2512	1.2585	1.265	1.2704	1.2747	1.2777
0.42613	0.42737	0.44664	0.49803	0.58501	0.69949	0.82829	0.94435	1.022	1.056	1.0643	1.0638	1.0701	1.0932	1.1255	1.1566	1.1789	1.1877	1.186	1.1781	1.1681	1.1594	1.1527	1.148	1.1449	1.1433	1.1429	1.1436	1.1451	1.1471	1.1497	1.1529	1.1569	1.1616	1.1671	1.1735	1.1807	1.1888	1.1976	1.2067	1.216	1.2253	1.2344	1.243	1.251	1.2584	1.2648	1.2703	1.2746	1.2776
0.4261	0.42728	0.44554	0.49634	0.58389	0.69954	0.82897	0.94463	1.0213	1.0542	1.0617	1.0609	1.0671	1.0905	1.1232	1.1548	1.1774	1.1866	1.1853	1.1777	1.1678	1.1591	1.1523	1.1473	1.1439	1.142	1.1415	1.1419	1.1432	1.1452	1.1478	1.1511	1.1552	1.1601	1.1658	1.1724	1.1798	1.1881	1.197	1.2062	1.2157	1.225	1.2341	1.2428	1.2509	1.2582	1.2647	1.2702	1.2745	1.2775
0.42607	0.42719	0.44448	0.4947	0.58281	0.69961	0.82965	0.94491	1.0206	1.0525	1.0592	1.0579	1.0641	1.0878	1.1209	1.1529	1.176	1.1856	1.1846	1.1773	1.1675	1.1588	1.1518	1.1466	1.143	1.1408	1.14	1.1402	1.1414	1.1433	1.146	1.1494	1.1536	1.1586	1.1645	1.1713	1.1789	1.1874	1.1964	1.2058	1.2153	1.2247	1.2339	1.2426	1.2507	1.2581	1.2646	1.2701	1.2744	1.2774
0.42604	0.42711	0.44345	0.49311	0.58177	0.6997	0.83032	0.94518	1.0199	1.0507	1.0567	1.0551	1.0612	1.0851	1.1186	1.1511	1.1746	1.1846	1.1839	1.1768	1.1672	1.1584	1.1514	1.1459	1.142	1.1396	1.1385	1.1386	1.1396	1.1415	1.1441	1.1476	1.152	1.1572	1.1633	1.1702	1.1781	1.1867	1.1958	1.2053	1.2149	1.2244	1.2337	1.2424	1.2506	1.258	1.2645	1.2699	1.2743	1.2773
0.42602	0.42704	0.44246	0.49157	0.58077	0.69981	0.831	0.94546	1.0192	1.049	1.0542	1.0522	1.0583	1.0825	1.1164	1.1493	1.1732	1.1836	1.1833	1.1764	1.1669	1.1581	1.1509	1.1452	1.1411	1.1384	1.1371	1.137	1.1379	1.1397	1.1423	1.1459	1.1504	1.1558	1.162	1.1692	1.1772	1.186	1.1953	1.2049	1.2146	1.2242	1.2334	1.2422	1.2504	1.2578	1.2643	1.2698	1.2742	1.2772
0.42601	0.42698	0.4415	0.49008	0.57981	0.69993	0.83167	0.94573	1.0185	1.0473	1.0518	1.0494	1.0555	1.08	1.1142	1.1475	1.1718	1.1826	1.1826	1.176	1.1666	1.1578	1.1505	1.1446	1.1402	1.1373	1.1357	1.1354	1.1361	1.1379	1.1406	1.1442	1.1488	1.1544	1.1608	1.1682	1.1763	1.1853	1.1947	1.2044	1.2142	1.2239	1.2332	1.242	1.2503	1.2577	1.2642	1.2697	1.2741	1.2772
0.426	0.42692	0.44057	0.48864	0.57889	0.70006	0.83235	0.94601	1.0179	1.0456	1.0494	1.0467	1.0527	1.0774	1.1121	1.1458	1.1705	1.1816	1.1819	1.1756	1.1663	1.1575	1.15	1.144	1.1393	1.1361	1.1343	1.1338	1.1344	1.1361	1.1388	1.1426	1.1473	1.153	1.1596	1.1671	1.1755	1.1846	1.1942	1.204	1.2139	1.2236	1.233	1.2419	1.2501	1.2576	1.2641	1.2696	1.274	1.2771
0.426	0.42688	0.43968	0.48725	0.57801	0.70022	0.83302	0.94627	1.0172	1.0439	1.047	1.044	1.05	1.0749	1.1099	1.144	1.1691	1.1806	1.1813	1.1752	1.166	1.1572	1.1496	1.1433	1.1384	1.135	1.1329	1.1322	1.1327	1.1344	1.1371	1.1409	1.1458	1.1516	1.1584	1.1661	1.1747	1.1839	1.1936	1.2036	1.2135	1.2233	1.2328	1.2417	1.2499	1.2574	1.264	1.2695	1.2739	1.277
0.426	0.42685	0.43882	0.4859	0.57717	0.70038	0.83369	0.94654	1.0166	1.0423	1.0447	1.0413	1.0473	1.0725	1.1078	1.1423	1.1678	1.1796	1.1806	1.1747	1.1657	1.1569	1.1492	1.1427	1.1376	1.1339	1.1316	1.1307	1.1311	1.1327	1.1354	1.1393	1.1443	1.1503	1.1573	1.1652	1.1739	1.1833	1.1931	1.2031	1.2132	1.223	1.2325	1.2415	1.2498	1.2573	1.2639	1.2694	1.2738	1.2769
0.426	0.42682	0.438	0.48461	0.57637	0.70057	0.83436	0.94681	1.0159	1.0407	1.0424	1.0387	1.0447	1.0701	1.1058	1.1406	1.1665	1.1786	1.1799	1.1743	1.1655	1.1566	1.1488	1.1421	1.1367	1.1328	1.1303	1.1292	1.1295	1.131	1.1338	1.1377	1.1428	1.149	1.1561	1.1642	1.1731	1.1826	1.1926	1.2027	1.2129	1.2228	1.2323	1.2413	1.2496	1.2572	1.2638	1.2693	1.2737	1.2768
0.42601	0.42681	0.4372	0.48336	0.5756	0.70077	0.83503	0.94707	1.0153	1.0391	1.0402	1.0361	1.0421	1.0677	1.1037	1.139	1.1652	1.1777	1.1793	1.1739	1.1652	1.1564	1.1484	1.1415	1.1359	1.1317	1.129	1.1277	1.1279	1.1294	1.1322	1.1362	1.1414	1.1477	1.155	1.1632	1.1723	1.182	1.192	1.2023	1.2125	1.2225	1.2321	1.2411	1.2495	1.257	1.2636	1.2692	1.2736	1.2767
0.42603	0.4268	0.43645	0.48216	0.57488	0.70099	0.8357	0.94733	1.0147	1.0376	1.038	1.0336	1.0395	1.0654	1.1017	1.1373	1.1639	1.1767	1.1786	1.1735	1.1649	1.1561	1.148	1.1409	1.1351	1.1307	1.1277	1.1263	1.1263	1.1278	1.1306	1.1347	1.14	1.1464	1.1539	1.1623	1.1715	1.1813	1.1915	1.2019	1.2122	1.2223	1.2319	1.241	1.2493	1.2569	1.2635	1.2691	1.2735	1.2766
0.42604	0.4268	0.43572	0.48101	0.57419	0.70122	0.83637	0.94759	1.0141	1.036	1.0358	1.0311	1.037	1.0631	1.0998	1.1357	1.1626	1.1758	1.178	1.1731	1.1646	1.1558	1.1476	1.1403	1.1343	1.1296	1.1265	1.1249	1.1248	1.1262	1.129	1.1332	1.1386	1.1451	1.1528	1.1614	1.1707	1.1807	1.191	1.2015	1.2119	1.222	1.2317	1.2408	1.2492	1.2568	1.2634	1.269	1.2734	1.2765
0.42607	0.42681	0.43503	0.4799	0.57354	0.70146	0.83704	0.94785	1.0135	1.0345	1.0336	1.0286	1.0345	1.0608	1.0978	1.1341	1.1613	1.1748	1.1774	1.1727	1.1644	1.1555	1.1472	1.1397	1.1335	1.1286	1.1253	1.1235	1.1232	1.1246	1.1274	1.1317	1.1372	1.1439	1.1517	1.1605	1.17	1.1801	1.1905	1.2011	1.2116	1.2217	1.2315	1.2406	1.249	1.2566	1.2633	1.2689	1.2733	1.2765
0.4261	0.42683	0.43437	0.47884	0.57293	0.70173	0.8377	0.9481	1.0129	1.033	1.0315	1.0262	1.0321	1.0586	1.0959	1.1325	1.1601	1.1739	1.1767	1.1723	1.1641	1.1552	1.1468	1.1392	1.1327	1.1276	1.124	1.1221	1.1217	1.1231	1.1259	1.1302	1.1359	1.1427	1.1507	1.1596	1.1692	1.1795	1.1901	1.2007	1.2112	1.2215	1.2313	1.2404	1.2489	1.2565	1.2632	1.2688	1.2732	1.2764
0.42613	0.42686	0.43374	0.47783	0.57235	0.702	0.83837	0.94836	1.0123	1.0315	1.0295	1.0239	1.0297	1.0564	1.094	1.131	1.1589	1.173	1.1761	1.1719	1.1638	1.155	1.1464	1.1386	1.132	1.1266	1.1229	1.1207	1.1203	1.1216	1.1244	1.1288	1.1345	1.1415	1.1496	1.1587	1.1685	1.1789	1.1896	1.2003	1.2109	1.2212	1.2311	1.2403	1.2488	1.2564	1.2631	1.2687	1.2731	1.2763
0.42617	0.4269	0.43314	0.47686	0.57182	0.7023	0.83903	0.94861	1.0117	1.0301	1.0274	1.0215	1.0273	1.0543	1.0922	1.1294	1.1576	1.1721	1.1755	1.1715	1.1635	1.1547	1.1461	1.1381	1.1312	1.1257	1.1217	1.1194	1.1188	1.1201	1.123	1.1274	1.1332	1.1403	1.1486	1.1578	1.1678	1.1783	1.1891	1.1999	1.2106	1.221	1.2309	1.2401	1.2486	1.2563	1.2629	1.2686	1.273	1.2762
0.42621	0.42694	0.43258	0.47594	0.57132	0.7026	0.8397	0.94886	1.0111	1.0287	1.0254	1.0193	1.025	1.0521	1.0903	1.1279	1.1564	1.1712	1.1748	1.1711	1.1633	1.1544	1.1457	1.1376	1.1305	1.1247	1.1206	1.1181	1.1174	1.1186	1.1215	1.126	1.1319	1.1392	1.1476	1.157	1.1671	1.1777	1.1886	1.1996	1.2103	1.2207	1.2307	1.2399	1.2485	1.2561	1.2628	1.2685	1.2729	1.2761
0.42626	0.427	0.43205	0.47507	0.57086	0.70293	0.84036	0.9491	1.0106	1.0273	1.0234	1.017	1.0228	1.0501	1.0885	1.1264	1.1552	1.1703	1.1742	1.1707	1.163	1.1542	1.1453	1.137	1.1297	1.1238	1.1194	1.1168	1.116	1.1172	1.1201	1.1247	1.1307	1.1381	1.1466	1.1561	1.1664	1.1772	1.1882	1.1992	1.21	1.2205	1.2305	1.2398	1.2483	1.256	1.2627	1.2684	1.2728	1.276
0.42631	0.42706	0.43154	0.47424	0.57043	0.70327	0.84102	0.94935	1.01	1.0259	1.0215	1.0148	1.0206	1.048	1.0868	1.1249	1.1541	1.1694	1.1736	1.1703	1.1627	1.1539	1.145	1.1365	1.129	1.1229	1.1183	1.1156	1.1147	1.1158	1.1187	1.1233	1.1295	1.137	1.1456	1.1553	1.1657	1.1766	1.1877	1.1988	1.2097	1.2203	1.2303	1.2396	1.2482	1.2559	1.2626	1.2682	1.2727	1.276
0.42637	0.42713	0.43108	0.47346	0.57004	0.70362	0.84168	0.94959	1.0095	1.0245	1.0196	1.0126	1.0184	1.046	1.085	1.1235	1.1529	1.1685	1.173	1.1699	1.1625	1.1537	1.1446	1.136	1.1283	1.122	1.1173	1.1143	1.1134	1.1144	1.1174	1.122	1.1283	1.1359	1.1447	1.1545	1.165	1.1761	1.1873	1.1985	1.2094	1.22	1.2301	1.2394	1.248	1.2558	1.2625	1.2681	1.2726	1.2759
0.42643	0.42721	0.43064	0.47272	0.56969	0.70399	0.84234	0.94983	1.0089	1.0232	1.0177	1.0105	1.0162	1.0441	1.0833	1.122	1.1518	1.1677	1.1724	1.1695	1.1622	1.1534	1.1443	1.1355	1.1277	1.1211	1.1162	1.1131	1.112	1.1131	1.116	1.1207	1.1271	1.1348	1.1438	1.1537	1.1644	1.1755	1.1868	1.1981	1.2091	1.2198	1.2299	1.2393	1.2479	1.2556	1.2624	1.268	1.2725	1.2758
0.42649	0.4273	0.43023	0.47203	0.56937	0.70437	0.843	0.95007	1.0084	1.0219	1.0159	1.0084	1.0141	1.0421	1.0816	1.1206	1.1506	1.1668	1.1718	1.1691	1.1619	1.1531	1.1439	1.135	1.127	1.1203	1.1152	1.1119	1.1108	1.1117	1.1147	1.1195	1.1259	1.1337	1.1428	1.1529	1.1637	1.175	1.1864	1.1978	1.2089	1.2195	1.2297	1.2391	1.2478	1.2555	1.2623	1.2679	1.2724	1.2757
0.42656	0.42739	0.42986	0.47138	0.56909	0.70477	0.84365	0.95031	1.0079	1.0206	1.0141	1.0064	1.0121	1.0402	1.08	1.1192	1.1495	1.166	1.1712	1.1687	1.1617	1.1529	1.1436	1.1346	1.1263	1.1194	1.1142	1.1108	1.1095	1.1104	1.1134	1.1183	1.1248	1.1327	1.1419	1.1522	1.1631	1.1745	1.186	1.1974	1.2086	1.2193	1.2295	1.239	1.2476	1.2554	1.2622	1.2678	1.2724	1.2756
0.42664	0.4275	0.42951	0.47077	0.56885	0.70518	0.84431	0.95055	1.0074	1.0193	1.0123	1.0044	1.0101	1.0384	1.0784	1.1179	1.1484	1.1651	1.1706	1.1684	1.1614	1.1527	1.1433	1.1341	1.1257	1.1186	1.1132	1.1096	1.1083	1.1092	1.1122	1.1171	1.1236	1.1317	1.1411	1.1514	1.1625	1.174	1.1856	1.1971	1.2083	1.2191	1.2293	1.2388	1.2475	1.2553	1.262	1.2677	1.2723	1.2756
0.42671	0.42761	0.4292	0.47021	0.56864	0.70561	0.84497	0.95078	1.0069	1.0181	1.0106	1.0024	1.0081	1.0366	1.0768	1.1165	1.1473	1.1643	1.17	1.168	1.1612	1.1524	1.143	1.1336	1.1251	1.1178	1.1122	1.1085	1.1071	1.1079	1.1109	1.1159	1.1225	1.1307	1.1402	1.1507	1.1619	1.1735	1.1851	1.1967	1.208	1.2189	1.2291	1.2386	1.2473	1.2551	1.2619	1.2676	1.2722	1.2755
0.4268	0.42773	0.42891	0.4697	0.56847	0.70605	0.84562	0.95101	1.0064	1.0168	1.0089	1.0005	1.0061	1.0348	1.0752	1.1152	1.1462	1.1635	1.1695	1.1676	1.1609	1.1522	1.1427	1.1332	1.1245	1.117	1.1112	1.1074	1.1059	1.1067	1.1097	1.1147	1.1215	1.1298	1.1393	1.1499	1.1613	1.173	1.1847	1.1964	1.2078	1.2186	1.2289	1.2385	1.2472	1.255	1.2618	1.2675	1.2721	1.2754
0.42688	0.42786	0.42866	0.46923	0.56833	0.7065	0.84627	0.95124	1.0059	1.0156	1.0072	0.9986	1.0042	1.033	1.0737	1.1139	1.1451	1.1626	1.1689	1.1672	1.1607	1.1519	1.1423	1.1328	1.1239	1.1162	1.1103	1.1064	1.1047	1.1055	1.1085	1.1136	1.1204	1.1288	1.1385	1.1492	1.1607	1.1725	1.1843	1.1961	1.2075	1.2184	1.2287	1.2383	1.2471	1.2549	1.2617	1.2674	1.272	1.2753
0.42698	0.428	0.42844	0.4688	0.56822	0.70697	0.84693	0.95147	1.0054	1.0144	1.0055	0.99675	1.0024	1.0313	1.0721	1.1126	1.1441	1.1618	1.1683	1.1669	1.1604	1.1517	1.142	1.1323	1.1233	1.1155	1.1094	1.1053	1.1036	1.1043	1.1074	1.1125	1.1194	1.1279	1.1377	1.1485	1.1601	1.172	1.184	1.1958	1.2072	1.2182	1.2286	1.2382	1.2469	1.2548	1.2616	1.2674	1.2719	1.2752
0.42707	0.42814	0.42824	0.46841	0.56816	0.70746	0.84758	0.9517	1.0049	1.0133	1.0039	0.99494	1.0006	1.0296	1.0707	1.1113	1.143	1.161	1.1677	1.1665	1.1602	1.1515	1.1417	1.1319	1.1227	1.1147	1.1085	1.1043	1.1025	1.1032	1.1062	1.1114	1.1184	1.127	1.1369	1.1479	1.1595	1.1715	1.1836	1.1955	1.207	1.218	1.2284	1.238	1.2468	1.2547	1.2615	1.2673	1.2718	1.2752
0.42717	0.4283	0.42808	0.46807	0.56812	0.70796	0.84823	0.95192	1.0044	1.0121	1.0023	0.99316	0.99879	1.028	1.0692	1.1101	1.142	1.1602	1.1672	1.1661	1.1599	1.1512	1.1415	1.1315	1.1221	1.114	1.1076	1.1033	1.1014	1.1021	1.1051	1.1103	1.1174	1.1261	1.1361	1.1472	1.159	1.1711	1.1832	1.1951	1.2067	1.2178	1.2282	1.2379	1.2467	1.2545	1.2614	1.2672	1.2717	1.2751
0.42728	0.42846	0.42794	0.46777	0.56812	0.70847	0.84888	0.95214	1.004	1.011	1.0008	0.99143	0.99705	1.0264	1.0678	1.1088	1.141	1.1594	1.1666	1.1657	1.1597	1.151	1.1412	1.1311	1.1216	1.1133	1.1068	1.1023	1.1003	1.101	1.104	1.1093	1.1164	1.1252	1.1353	1.1465	1.1584	1.1706	1.1828	1.1948	1.2065	1.2176	1.228	1.2377	1.2465	1.2544	1.2613	1.2671	1.2717	1.275
0.42738	0.42863	0.42784	0.46751	0.56816	0.70899	0.84953	0.95237	1.0035	1.0099	0.99928	0.98973	0.99534	1.0248	1.0664	1.1076	1.14	1.1587	1.1661	1.1654	1.1594	1.1508	1.1409	1.1307	1.1211	1.1126	1.1059	1.1014	1.0993	1.0999	1.103	1.1082	1.1155	1.1243	1.1346	1.1459	1.1579	1.1702	1.1825	1.1945	1.2062	1.2174	1.2279	1.2376	1.2464	1.2543	1.2612	1.267	1.2716	1.2749
0.4275	0.4288	0.42776	0.4673	0.56823	0.70953	0.85018	0.95258	1.0031	1.0088	0.9978	0.98807	0.99368	1.0232	1.065	1.1064	1.139	1.1579	1.1655	1.165	1.1592	1.1506	1.1406	1.1303	1.1205	1.112	1.1051	1.1004	1.0983	1.0988	1.1019	1.1072	1.1145	1.1235	1.1339	1.1453	1.1574	1.1697	1.1821	1.1942	1.206	1.2172	1.2277	1.2374	1.2463	1.2542	1.2611	1.2669	1.2715	1.2749
0.42761	0.42899	0.42772	0.46712	0.56833	0.71009	0.85082	0.9528	1.0026	1.0077	0.99634	0.98644	0.99205	1.0217	1.0636	1.1052	1.138	1.1571	1.165	1.1646	1.1589	1.1503	1.1403	1.1299	1.12	1.1113	1.1043	1.0995	1.0973	1.0978	1.1009	1.1063	1.1136	1.1227	1.1331	1.1447	1.1569	1.1693	1.1818	1.194	1.2057	1.217	1.2275	1.2373	1.2462	1.2541	1.261	1.2668	1.2714	1.2748
0.42774	0.42918	0.4277	0.46699	0.56846	0.71066	0.85147	0.95302	1.0022	1.0067	0.99492	0.98486	0.99046	1.0202	1.0623	1.1041	1.137	1.1564	1.1644	1.1643	1.1587	1.1501	1.1401	1.1296	1.1195	1.1107	1.1036	1.0986	1.0963	1.0968	1.0999	1.1053	1.1127	1.1219	1.1324	1.1441	1.1564	1.1689	1.1814	1.1937	1.2055	1.2168	1.2273	1.2371	1.246	1.254	1.2609	1.2667	1.2713	1.2747
0.42786	0.42938	0.42771	0.4669	0.56863	0.71124	0.85212	0.95323	1.0018	1.0057	0.99353	0.9833	0.98891	1.0188	1.061	1.103	1.1361	1.1556	1.1639	1.1639	1.1584	1.1499	1.1398	1.1292	1.119	1.11	1.1028	1.0978	1.0954	1.0959	1.099	1.1044	1.1119	1.1211	1.1317	1.1435	1.1559	1.1685	1.1811	1.1934	1.2053	1.2166	1.2272	1.237	1.2459	1.2538	1.2608	1.2666	1.2712	1.2746
0.42799	0.42959	0.42775	0.46685	0.56884	0.71183	0.85276	0.95344	1.0013	1.0047	0.99217	0.98179	0.9874	1.0174	1.0597	1.1018	1.1351	1.1549	1.1633	1.1636	1.1582	1.1497	1.1396	1.1289	1.1186	1.1094	1.1021	1.0969	1.0945	1.0949	1.098	1.1035	1.111	1.1203	1.1311	1.1429	1.1554	1.1681	1.1807	1.1931	1.205	1.2164	1.227	1.2368	1.2458	1.2537	1.2607	1.2665	1.2711	1.2746
0.42812	0.4298	0.42782	0.46684	0.56907	0.71244	0.85341	0.95365	1.0009	1.0037	0.99084	0.98031	0.98592	1.016	1.0585	1.1007	1.1342	1.1541	1.1628	1.1632	1.158	1.1495	1.1393	1.1285	1.1181	1.1088	1.1013	1.0961	1.0936	1.094	1.0971	1.1026	1.1102	1.1196	1.1304	1.1423	1.1549	1.1677	1.1804	1.1928	1.2048	1.2162	1.2269	1.2367	1.2456	1.2536	1.2606	1.2664	1.2711	1.2745
0.42826	0.43003	0.42791	0.46688	0.56934	0.71306	0.85405	0.95386	1.0005	1.0027	0.98953	0.97887	0.98448	1.0146	1.0573	1.0997	1.1333	1.1534	1.1623	1.1629	1.1577	1.1493	1.1391	1.1282	1.1176	1.1083	1.1006	1.0953	1.0927	1.0931	1.0962	1.1017	1.1094	1.1189	1.1298	1.1418	1.1544	1.1673	1.1801	1.1926	1.2046	1.216	1.2267	1.2366	1.2455	1.2535	1.2605	1.2663	1.271	1.2744
0.4284	0.43026	0.42804	0.46695	0.56964	0.7137	0.85469	0.95407	1.0001	1.0018	0.98826	0.97747	0.98307	1.0133	1.0561	1.0986	1.1324	1.1527	1.1617	1.1625	1.1575	1.1491	1.1388	1.1279	1.1172	1.1077	1.1	1.0945	1.0918	1.0922	1.0953	1.1009	1.1086	1.1181	1.1292	1.1413	1.154	1.1669	1.1798	1.1923	1.2044	1.2158	1.2265	1.2364	1.2454	1.2534	1.2604	1.2662	1.2709	1.2744
0.42855	0.4305	0.42819	0.46706	0.56998	0.71434	0.85533	0.95427	0.99973	1.0009	0.98702	0.9761	0.98171	1.012	1.0549	1.0976	1.1315	1.152	1.1612	1.1622	1.1573	1.1489	1.1386	1.1275	1.1168	1.1071	1.0993	1.0938	1.091	1.0913	1.0945	1.1001	1.1078	1.1175	1.1285	1.1407	1.1536	1.1666	1.1795	1.1921	1.2042	1.2156	1.2264	1.2363	1.2453	1.2533	1.2603	1.2661	1.2708	1.2743
0.4287	0.43074	0.42837	0.46721	0.57034	0.715	0.85597	0.95448	0.99934	0.99997	0.98581	0.97476	0.98038	1.0108	1.0537	1.0965	1.1306	1.1513	1.1607	1.1618	1.157	1.1487	1.1384	1.1272	1.1164	1.1066	1.0987	1.093	1.0902	1.0905	1.0936	1.0993	1.1071	1.1168	1.1279	1.1402	1.1531	1.1662	1.1792	1.1918	1.204	1.2155	1.2262	1.2361	1.2451	1.2532	1.2602	1.266	1.2707	1.2742
0.42885	0.43099	0.42858	0.46741	0.57074	0.71568	0.85661	0.95468	0.99896	0.99908	0.98463	0.97346	0.97908	1.0096	1.0526	1.0955	1.1297	1.1506	1.1602	1.1615	1.1568	1.1485	1.1381	1.1269	1.116	1.1061	1.098	1.0923	1.0894	1.0897	1.0928	1.0985	1.1064	1.1161	1.1274	1.1397	1.1527	1.1659	1.1789	1.1916	1.2037	1.2153	1.2261	1.236	1.245	1.2531	1.2601	1.2659	1.2706	1.2741
0.42901	0.43125	0.42881	0.46764	0.57117	0.71637	0.85725	0.95488	0.99859	0.99822	0.98347	0.9722	0.97782	1.0084	1.0515	1.0945	1.1289	1.1499	1.1597	1.1611	1.1566	1.1483	1.1379	1.1266	1.1156	1.1056	1.0974	1.0916	1.0887	1.0889	1.092	1.0977	1.1057	1.1155	1.1268	1.1392	1.1523	1.1655	1.1786	1.1913	1.2035	1.2151	1.2259	1.2359	1.2449	1.253	1.26	1.2658	1.2706	1.2741
0.42917	0.43152	0.42907	0.46791	0.57163	0.71707	0.85789	0.95508	0.99823	0.99737	0.98235	0.97097	0.9766	1.0072	1.0505	1.0936	1.128	1.1492	1.1592	1.1608	1.1563	1.1481	1.1377	1.1264	1.1152	1.1051	1.0968	1.0909	1.0879	1.0881	1.0913	1.097	1.105	1.1149	1.1263	1.1388	1.1519	1.1652	1.1783	1.1911	1.2033	1.2149	1.2258	1.2357	1.2448	1.2528	1.2599	1.2658	1.2705	1.274
0.42933	0.4318	0.42936	0.46822	0.57212	0.71778	0.85853	0.95527	0.99787	0.99654	0.98125	0.96977	0.97541	1.0061	1.0494	1.0926	1.1272	1.1485	1.1587	1.1604	1.1561	1.1479	1.1375	1.1261	1.1148	1.1046	1.0963	1.0903	1.0872	1.0874	1.0905	1.0963	1.1043	1.1143	1.1257	1.1383	1.1515	1.1648	1.178	1.1909	1.2031	1.2148	1.2256	1.2356	1.2447	1.2527	1.2598	1.2657	1.2704	1.2739
0.4295	0.43208	0.42968	0.46857	0.57264	0.7185	0.85916	0.95547	0.99752	0.99573	0.98018	0.96861	0.97426	1.005	1.0484	1.0917	1.1264	1.1478	1.1582	1.1601	1.1559	1.1478	1.1373	1.1258	1.1145	1.1042	1.0957	1.0896	1.0865	1.0867	1.0898	1.0956	1.1037	1.1137	1.1252	1.1379	1.1511	1.1645	1.1778	1.1906	1.2029	1.2146	1.2255	1.2355	1.2445	1.2526	1.2597	1.2656	1.2703	1.2739
0.42967	0.43237	0.43002	0.46895	0.5732	0.71924	0.8598	0.95566	0.99717	0.99494	0.97915	0.96748	0.97314	1.0039	1.0474	1.0908	1.1256	1.1472	1.1577	1.1598	1.1557	1.1476	1.1371	1.1256	1.1141	1.1037	1.0952	1.089	1.0858	1.086	1.0891	1.0949	1.103	1.1131	1.1247	1.1374	1.1508	1.1642	1.1775	1.1904	1.2028	1.2144	1.2253	1.2353	1.2444	1.2525	1.2596	1.2655	1.2702	1.2738
0.42985	0.43266	0.43039	0.46938	0.57378	0.71999	0.86043	0.95586	0.99683	0.99417	0.97814	0.96639	0.97206	1.0029	1.0464	1.0899	1.1248	1.1465	1.1572	1.1594	1.1554	1.1474	1.1369	1.1253	1.1138	1.1033	1.0947	1.0884	1.0852	1.0853	1.0884	1.0943	1.1024	1.1125	1.1242	1.137	1.1504	1.1639	1.1772	1.1902	1.2026	1.2143	1.2252	1.2352	1.2443	1.2524	1.2595	1.2654	1.2702	1.2737
0.43003	0.43297	0.43078	0.46984	0.5744	0.72076	0.86107	0.95605	0.9965	0.99342	0.97715	0.96533	0.97101	1.0019	1.0455	1.089	1.124	1.1459	1.1567	1.1591	1.1552	1.1472	1.1367	1.1251	1.1135	1.1029	1.0942	1.0879	1.0846	1.0846	1.0878	1.0937	1.1018	1.112	1.1237	1.1366	1.15	1.1636	1.177	1.19	1.2024	1.2141	1.225	1.2351	1.2442	1.2523	1.2594	1.2653	1.2701	1.2737
0.43022	0.43328	0.4312	0.47034	0.57504	0.72153	0.8617	0.95623	0.99617	0.99269	0.9762	0.9643	0.96999	1.0009	1.0445	1.0881	1.1232	1.1452	1.1562	1.1588	1.155	1.147	1.1365	1.1248	1.1132	1.1025	1.0937	1.0873	1.084	1.084	1.0872	1.093	1.1013	1.1115	1.1233	1.1362	1.1497	1.1633	1.1767	1.1898	1.2022	1.2139	1.2249	1.235	1.2441	1.2522	1.2593	1.2652	1.27	1.2736
0.4304	0.43359	0.43165	0.47088	0.57572	0.72232	0.86233	0.95642	0.99585	0.99197	0.97527	0.96331	0.96901	0.99999	1.0436	1.0873	1.1224	1.1446	1.1557	1.1584	1.1548	1.1469	1.1363	1.1246	1.1129	1.1021	1.0932	1.0868	1.0834	1.0834	1.0866	1.0925	1.1007	1.111	1.1228	1.1358	1.1494	1.163	1.1765	1.1896	1.202	1.2138	1.2248	1.2348	1.244	1.2521	1.2592	1.2651	1.2699	1.2735
0.43059	0.43392	0.43212	0.47146	0.57643	0.72312	0.86296	0.95661	0.99554	0.99127	0.97437	0.96235	0.96806	0.99908	1.0428	1.0864	1.1217	1.144	1.1553	1.1581	1.1546	1.1467	1.1362	1.1244	1.1126	1.1018	1.0928	1.0862	1.0828	1.0828	1.086	1.0919	1.1002	1.1105	1.1224	1.1354	1.1491	1.1628	1.1763	1.1893	1.2018	1.2136	1.2246	1.2347	1.2438	1.252	1.2591	1.265	1.2699	1.2735
0.43079	0.43425	0.43262	0.47207	0.57716	0.72393	0.86359	0.95679	0.99523	0.99059	0.9735	0.96142	0.96715	0.99819	1.0419	1.0856	1.1209	1.1433	1.1548	1.1578	1.1543	1.1465	1.136	1.1242	1.1123	1.1014	1.0923	1.0858	1.0823	1.0822	1.0854	1.0913	1.0997	1.11	1.122	1.1351	1.1487	1.1625	1.176	1.1892	1.2017	1.2135	1.2245	1.2346	1.2437	1.2519	1.259	1.265	1.2698	1.2734
0.43099	0.43459	0.43314	0.47272	0.57793	0.72476	0.86422	0.95697	0.99493	0.98993	0.97266	0.96053	0.96627	0.99734	1.0411	1.0848	1.1202	1.1427	1.1543	1.1574	1.1541	1.1464	1.1358	1.124	1.112	1.1011	1.0919	1.0853	1.0817	1.0817	1.0848	1.0908	1.0992	1.1096	1.1216	1.1347	1.1484	1.1622	1.1758	1.189	1.2015	1.2133	1.2243	1.2345	1.2436	1.2518	1.2589	1.2649	1.2697	1.2734
0.43119	0.43493	0.43369	0.4734	0.57872	0.72559	0.86485	0.95715	0.99464	0.98928	0.97184	0.95966	0.96542	0.99652	1.0403	1.084	1.1195	1.1421	1.1538	1.1571	1.1539	1.1462	1.1357	1.1238	1.1118	1.1007	1.0915	1.0848	1.0812	1.0812	1.0843	1.0903	1.0987	1.1091	1.1212	1.1344	1.1481	1.162	1.1756	1.1888	1.2013	1.2132	1.2242	1.2343	1.2435	1.2517	1.2588	1.2648	1.2696	1.2733
0.4314	0.43528	0.43426	0.47412	0.57955	0.72644	0.86548	0.95733	0.99435	0.98866	0.97105	0.95883	0.9646	0.99572	1.0395	1.0833	1.1188	1.1415	1.1534	1.1568	1.1537	1.1461	1.1355	1.1236	1.1115	1.1004	1.0911	1.0844	1.0807	1.0807	1.0838	1.0898	1.0982	1.1087	1.1208	1.134	1.1479	1.1617	1.1754	1.1886	1.2012	1.213	1.2241	1.2342	1.2434	1.2516	1.2587	1.2647	1.2696	1.2732
0.43161	0.43564	0.43486	0.47488	0.5804	0.7273	0.86611	0.95751	0.99407	0.98805	0.97028	0.95803	0.96382	0.99495	1.0387	1.0825	1.1181	1.1409	1.1529	1.1565	1.1535	1.1459	1.1354	1.1234	1.1113	1.1001	1.0908	1.084	1.0803	1.0802	1.0833	1.0893	1.0978	1.1083	1.1204	1.1337	1.1476	1.1615	1.1752	1.1884	1.201	1.2129	1.2239	1.2341	1.2433	1.2515	1.2586	1.2646	1.2695	1.2732
0.43182	0.43601	0.43549	0.47567	0.58128	0.72817	0.86674	0.95769	0.99379	0.98746	0.96954	0.95727	0.96307	0.99421	1.038	1.0818	1.1174	1.1403	1.1525	1.1562	1.1533	1.1457	1.1352	1.1232	1.1111	1.0998	1.0904	1.0835	1.0798	1.0797	1.0829	1.0889	1.0974	1.1079	1.1201	1.1334	1.1473	1.1613	1.175	1.1882	1.2009	1.2128	1.2238	1.234	1.2432	1.2514	1.2585	1.2645	1.2694	1.2731
0.43204	0.43638	0.43613	0.4765	0.58219	0.72906	0.86736	0.95786	0.99353	0.98688	0.96883	0.95653	0.96235	0.9935	1.0373	1.0811	1.1167	1.1397	1.152	1.1558	1.1531	1.1456	1.1351	1.123	1.1108	1.0996	1.0901	1.0832	1.0794	1.0793	1.0824	1.0884	1.097	1.1075	1.1197	1.1331	1.1471	1.1611	1.1748	1.1881	1.2007	1.2126	1.2237	1.2339	1.2431	1.2513	1.2584	1.2644	1.2693	1.273
0.43226	0.43676	0.43681	0.47736	0.58313	0.72995	0.86799	0.95803	0.99326	0.98632	0.96815	0.95583	0.96167	0.99282	1.0366	1.0804	1.116	1.1392	1.1516	1.1555	1.1529	1.1454	1.1349	1.1229	1.1106	1.0993	1.0898	1.0828	1.079	1.0788	1.082	1.088	1.0966	1.1072	1.1194	1.1328	1.1468	1.1608	1.1746	1.1879	1.2006	1.2125	1.2236	1.2337	1.243	1.2512	1.2583	1.2644	1.2693	1.273
0.43248	0.43714	0.4375	0.47826	0.5841	0.73086	0.86861	0.95821	0.993	0.98578	0.96749	0.95515	0.96101	0.99216	1.0359	1.0797	1.1154	1.1386	1.1511	1.1552	1.1527	1.1453	1.1348	1.1227	1.1104	1.0991	1.0895	1.0824	1.0786	1.0784	1.0816	1.0876	1.0962	1.1068	1.1191	1.1325	1.1466	1.1606	1.1744	1.1877	1.2004	1.2123	1.2234	1.2336	1.2429	1.2511	1.2582	1.2643	1.2692	1.2729
0.43271	0.43753	0.43822	0.47919	0.58509	0.73177	0.86924	0.95838	0.99275	0.98526	0.96685	0.95451	0.96039	0.99154	1.0352	1.079	1.1147	1.138	1.1507	1.1549	1.1525	1.1451	1.1347	1.1226	1.1103	1.0988	1.0892	1.0821	1.0783	1.078	1.0812	1.0873	1.0958	1.1065	1.1188	1.1323	1.1463	1.1604	1.1742	1.1876	1.2003	1.2122	1.2233	1.2335	1.2427	1.251	1.2581	1.2642	1.2691	1.2729
0.43294	0.43793	0.43897	0.48016	0.58611	0.7327	0.86986	0.95854	0.99251	0.98475	0.96624	0.9539	0.9598	0.99094	1.0346	1.0784	1.1141	1.1375	1.1502	1.1546	1.1523	1.145	1.1345	1.1224	1.1101	1.0986	1.0889	1.0818	1.0779	1.0777	1.0808	1.0869	1.0955	1.1062	1.1185	1.132	1.1461	1.1602	1.1741	1.1874	1.2001	1.2121	1.2232	1.2334	1.2426	1.2509	1.258	1.2641	1.269	1.2728
0.43317	0.43833	0.43973	0.48116	0.58716	0.73364	0.87048	0.95871	0.99227	0.98426	0.96566	0.95331	0.95924	0.99037	1.034	1.0777	1.1135	1.1369	1.1498	1.1543	1.1521	1.1449	1.1344	1.1223	1.1099	1.0984	1.0887	1.0815	1.0776	1.0773	1.0805	1.0866	1.0952	1.1059	1.1183	1.1318	1.1459	1.16	1.1739	1.1873	1.2	1.212	1.2231	1.2333	1.2425	1.2508	1.2579	1.264	1.269	1.2727
0.43341	0.43874	0.44053	0.4822	0.58824	0.7346	0.87111	0.95888	0.99203	0.98378	0.9651	0.95276	0.95871	0.98982	1.0334	1.0771	1.1129	1.1364	1.1494	1.154	1.1518	1.1447	1.1343	1.1222	1.1098	1.0982	1.0885	1.0812	1.0773	1.077	1.0802	1.0862	1.0949	1.1056	1.118	1.1316	1.1457	1.1599	1.1737	1.1871	1.1998	1.2118	1.223	1.2332	1.2424	1.2507	1.2579	1.2639	1.2689	1.2727
0.43365	0.43916	0.44134	0.48326	0.58934	0.73556	0.87173	0.95904	0.99181	0.98333	0.96457	0.95224	0.95821	0.9893	1.0328	1.0765	1.1123	1.1358	1.1489	1.1537	1.1516	1.1446	1.1342	1.1221	1.1096	1.098	1.0882	1.081	1.077	1.0767	1.0798	1.0859	1.0946	1.1053	1.1178	1.1313	1.1455	1.1597	1.1736	1.187	1.1997	1.2117	1.2228	1.2331	1.2423	1.2506	1.2578	1.2639	1.2688	1.2726
0.43389	0.43958	0.44218	0.48437	0.59047	0.73653	0.87235	0.95921	0.99158	0.98288	0.96406	0.95175	0.95774	0.98881	1.0323	1.0759	1.1117	1.1353	1.1485	1.1534	1.1514	1.1445	1.1341	1.122	1.1095	1.0979	1.088	1.0807	1.0767	1.0764	1.0796	1.0857	1.0943	1.1051	1.1175	1.1311	1.1453	1.1595	1.1734	1.1868	1.1996	1.2116	1.2227	1.233	1.2422	1.2505	1.2577	1.2638	1.2687	1.2726
0.43414	0.44001	0.44304	0.4855	0.59163	0.73752	0.87297	0.95937	0.99137	0.98246	0.96357	0.95128	0.9573	0.98835	1.0318	1.0753	1.1111	1.1348	1.1481	1.1531	1.1513	1.1443	1.134	1.1219	1.1094	1.0977	1.0878	1.0805	1.0765	1.0762	1.0793	1.0854	1.094	1.1048	1.1173	1.1309	1.1451	1.1594	1.1733	1.1867	1.1995	1.2115	1.2226	1.2328	1.2421	1.2504	1.2576	1.2637	1.2687	1.2725
0.43439	0.44045	0.44392	0.48667	0.59282	0.73851	0.87359	0.95953	0.99116	0.98205	0.96311	0.95085	0.95689	0.98791	1.0313	1.0748	1.1105	1.1343	1.1477	1.1527	1.1511	1.1442	1.1339	1.1218	1.1093	1.0976	1.0877	1.0803	1.0762	1.0759	1.079	1.0851	1.0938	1.1046	1.1171	1.1307	1.145	1.1592	1.1731	1.1866	1.1993	1.2113	1.2225	1.2327	1.242	1.2503	1.2575	1.2636	1.2686	1.2724
0.43464	0.44089	0.44483	0.48787	0.59403	0.73952	0.8742	0.95969	0.99095	0.98166	0.96268	0.95044	0.95651	0.9875	1.0308	1.0742	1.1099	1.1337	1.1472	1.1524	1.1509	1.1441	1.1338	1.1217	1.1092	1.0975	1.0875	1.0801	1.076	1.0757	1.0788	1.0849	1.0936	1.1044	1.1169	1.1306	1.1448	1.1591	1.173	1.1864	1.1992	1.2112	1.2224	1.2326	1.2419	1.2502	1.2574	1.2635	1.2685	1.2724
0.4349	0.44133	0.44576	0.4891	0.59526	0.74053	0.87482	0.95984	0.99075	0.98128	0.96226	0.95006	0.95616	0.98711	1.0303	1.0737	1.1094	1.1332	1.1468	1.1521	1.1507	1.1439	1.1337	1.1216	1.1091	1.0973	1.0874	1.08	1.0758	1.0755	1.0786	1.0847	1.0934	1.1042	1.1167	1.1304	1.1447	1.1589	1.1729	1.1863	1.1991	1.2111	1.2223	1.2325	1.2418	1.2501	1.2573	1.2635	1.2685	1.2723
0.43516	0.44179	0.44671	0.49037	0.59652	0.74156	0.87544	0.96	0.99056	0.98091	0.96188	0.94972	0.95584	0.98675	1.0299	1.0732	1.1088	1.1327	1.1464	1.1519	1.1505	1.1438	1.1336	1.1215	1.109	1.0972	1.0872	1.0798	1.0756	1.0753	1.0784	1.0845	1.0932	1.104	1.1165	1.1302	1.1445	1.1588	1.1727	1.1862	1.199	1.211	1.2222	1.2324	1.2417	1.25	1.2572	1.2634	1.2684	1.2723
0.43542	0.44224	0.44768	0.49167	0.59781	0.7426	0.87606	0.96015	0.99037	0.98057	0.96151	0.9494	0.95554	0.98642	1.0295	1.0727	1.1083	1.1322	1.146	1.1516	1.1503	1.1437	1.1335	1.1214	1.1089	1.0971	1.0871	1.0797	1.0755	1.0751	1.0782	1.0843	1.093	1.1039	1.1164	1.1301	1.1444	1.1586	1.1726	1.1861	1.1989	1.2109	1.2221	1.2323	1.2416	1.2499	1.2571	1.2633	1.2683	1.2722
0.43569	0.44271	0.44867	0.49299	0.59913	0.74365	0.87667	0.96031	0.99019	0.98024	0.96117	0.9491	0.95528	0.98611	1.0291	1.0722	1.1078	1.1317	1.1456	1.1513	1.1501	1.1436	1.1334	1.1214	1.1089	1.0971	1.087	1.0795	1.0753	1.075	1.078	1.0842	1.0928	1.1037	1.1162	1.13	1.1442	1.1585	1.1725	1.1859	1.1987	1.2108	1.222	1.2322	1.2415	1.2498	1.257	1.2632	1.2683	1.2722
0.43596	0.44318	0.44969	0.49435	0.60047	0.7447	0.87729	0.96046	0.99001	0.97992	0.96085	0.94884	0.95505	0.98582	1.0287	1.0717	1.1073	1.1312	1.1452	1.151	1.1499	1.1435	1.1334	1.1213	1.1088	1.097	1.0869	1.0794	1.0752	1.0748	1.0779	1.084	1.0927	1.1036	1.1161	1.1298	1.1441	1.1584	1.1724	1.1858	1.1986	1.2107	1.2219	1.2321	1.2414	1.2497	1.257	1.2631	1.2682	1.2721
0.43623	0.44366	0.45073	0.49575	0.60183	0.74577	0.8779	0.96061	0.98984	0.97962	0.96056	0.9486	0.95484	0.98556	1.0283	1.0712	1.1067	1.1308	1.1448	1.1507	1.1497	1.1433	1.1333	1.1213	1.1088	1.097	1.0869	1.0793	1.0751	1.0747	1.0778	1.0839	1.0926	1.1034	1.116	1.1297	1.144	1.1583	1.1723	1.1857	1.1985	1.2106	1.2218	1.232	1.2413	1.2496	1.2569	1.2631	1.2681	1.2721
0.43651	0.44414	0.45179	0.49717	0.60322	0.74685	0.87851	0.96076	0.98967	0.97933	0.96029	0.94839	0.95466	0.98533	1.028	1.0708	1.1062	1.1303	1.1444	1.1504	1.1495	1.1432	1.1332	1.1212	1.1087	1.0969	1.0868	1.0793	1.075	1.0746	1.0777	1.0838	1.0925	1.1033	1.1159	1.1296	1.1439	1.1582	1.1722	1.1856	1.1984	1.2105	1.2216	1.2319	1.2412	1.2495	1.2568	1.263	1.2681	1.272
0.43679	0.44463	0.45287	0.49862	0.60463	0.74794	0.87913	0.96091	0.98951	0.97906	0.96004	0.94821	0.95451	0.98512	1.0277	1.0704	1.1058	1.1298	1.144	1.1501	1.1493	1.1431	1.1332	1.1212	1.1087	1.0969	1.0868	1.0792	1.075	1.0745	1.0776	1.0837	1.0924	1.1032	1.1158	1.1295	1.1438	1.1581	1.1721	1.1855	1.1983	1.2104	1.2215	1.2318	1.2411	1.2494	1.2567	1.2629	1.268	1.2719
0.43707	0.44512	0.45397	0.5001	0.60607	0.74904	0.87974	0.96105	0.98935	0.97881	0.95981	0.94806	0.95439	0.98493	1.0274	1.07	1.1053	1.1294	1.1436	1.1498	1.1491	1.143	1.1331	1.1212	1.1087	1.0969	1.0867	1.0792	1.0749	1.0745	1.0775	1.0836	1.0923	1.1031	1.1157	1.1294	1.1437	1.158	1.172	1.1854	1.1982	1.2103	1.2214	1.2317	1.241	1.2493	1.2566	1.2628	1.2679	1.2719
0.43735	0.44562	0.45509	0.50162	0.60753	0.75015	0.88035	0.9612	0.9892	0.97856	0.9596	0.94793	0.95429	0.98477	1.0271	1.0696	1.1048	1.1289	1.1432	1.1495	1.149	1.1429	1.1331	1.1211	1.1087	1.0969	1.0867	1.0792	1.0749	1.0744	1.0775	1.0835	1.0922	1.1031	1.1156	1.1293	1.1436	1.1579	1.1719	1.1853	1.1981	1.2102	1.2214	1.2316	1.2409	1.2492	1.2565	1.2627	1.2679	1.2718
0.43764	0.44612	0.45624	0.50316	0.60902	0.75127	0.88096	0.96134	0.98905	0.97834	0.95942	0.94783	0.95422	0.98463	1.0268	1.0692	1.1043	1.1284	1.1428	1.1492	1.1488	1.1428	1.133	1.1211	1.1087	1.0969	1.0867	1.0791	1.0749	1.0744	1.0774	1.0835	1.0922	1.103	1.1155	1.1293	1.1436	1.1578	1.1718	1.1853	1.198	1.2101	1.2213	1.2315	1.2408	1.2492	1.2564	1.2627	1.2678	1.2718
0.43793	0.44663	0.4574	0.50473	0.61053	0.75239	0.88157	0.96149	0.98891	0.97812	0.95926	0.94775	0.95418	0.98452	1.0266	1.0688	1.1039	1.128	1.1425	1.149	1.1486	1.1427	1.133	1.1211	1.1087	1.0969	1.0867	1.0792	1.0748	1.0744	1.0774	1.0835	1.0921	1.103	1.1155	1.1292	1.1435	1.1578	1.1717	1.1852	1.198	1.21	1.2212	1.2314	1.2407	1.2491	1.2564	1.2626	1.2677	1.2717
0.43822	0.44715	0.45858	0.50633	0.61206	0.75353	0.88218	0.96163	0.98878	0.97793	0.95912	0.9477	0.95416	0.98443	1.0263	1.0684	1.1034	1.1275	1.1421	1.1487	1.1484	1.1426	1.1329	1.1211	1.1087	1.0969	1.0868	1.0792	1.0749	1.0744	1.0774	1.0834	1.0921	1.1029	1.1155	1.1292	1.1434	1.1577	1.1716	1.1851	1.1979	1.2099	1.2211	1.2313	1.2406	1.249	1.2563	1.2625	1.2677	1.2717
0.43852	0.44767	0.45979	0.50796	0.61362	0.75468	0.88279	0.96177	0.98865	0.97774	0.95901	0.94768	0.95417	0.98436	1.0261	1.0681	1.103	1.1271	1.1417	1.1484	1.1482	1.1425	1.1329	1.1211	1.1087	1.0969	1.0868	1.0792	1.0749	1.0744	1.0774	1.0834	1.0921	1.1029	1.1154	1.1291	1.1434	1.1576	1.1716	1.185	1.1978	1.2098	1.221	1.2312	1.2406	1.2489	1.2562	1.2624	1.2676	1.2716
0.43882	0.4482	0.46101	0.50962	0.6152	0.75584	0.8834	0.96191	0.98852	0.97757	0.95891	0.94768	0.95421	0.98432	1.0259	1.0677	1.1026	1.1267	1.1413	1.1481	1.148	1.1424	1.1328	1.1211	1.1087	1.097	1.0869	1.0793	1.0749	1.0744	1.0774	1.0835	1.0921	1.1029	1.1154	1.1291	1.1433	1.1576	1.1715	1.1849	1.1977	1.2097	1.2209	1.2311	1.2405	1.2488	1.2561	1.2624	1.2675	1.2716
0.43912	0.44873	0.46226	0.51131	0.6168	0.757	0.88401	0.96205	0.9884	0.97741	0.95884	0.9477	0.95427	0.98429	1.0258	1.0674	1.1022	1.1263	1.141	1.1478	1.1479	1.1423	1.1328	1.1211	1.1088	1.0971	1.0869	1.0793	1.075	1.0745	1.0775	1.0835	1.0921	1.1029	1.1154	1.1291	1.1433	1.1575	1.1714	1.1849	1.1976	1.2096	1.2208	1.2311	1.2404	1.2487	1.256	1.2623	1.2675	1.2715
0.43943	0.44927	0.46352	0.51303	0.61843	0.75818	0.88462	0.96218	0.98828	0.97727	0.95878	0.94776	0.95436	0.9843	1.0256	1.0671	1.1018	1.1258	1.1406	1.1476	1.1477	1.1422	1.1328	1.1211	1.1088	1.0971	1.087	1.0794	1.0751	1.0746	1.0775	1.0835	1.0921	1.1029	1.1154	1.129	1.1433	1.1575	1.1714	1.1848	1.1975	1.2095	1.2207	1.231	1.2403	1.2486	1.2559	1.2622	1.2674	1.2715
0.43973	0.44981	0.4648	0.51477	0.62008	0.75936	0.88522	0.96232	0.98817	0.97714	0.95875	0.94783	0.95448	0.98432	1.0255	1.0668	1.1014	1.1254	1.1402	1.1473	1.1475	1.1421	1.1327	1.1212	1.1089	1.0972	1.0871	1.0795	1.0752	1.0746	1.0776	1.0836	1.0922	1.1029	1.1154	1.129	1.1432	1.1574	1.1713	1.1847	1.1975	1.2095	1.2206	1.2309	1.2402	1.2485	1.2559	1.2621	1.2673	1.2714
0.44005	0.45036	0.46611	0.51655	0.62175	0.76056	0.88583	0.96245	0.98806	0.97703	0.95874	0.94794	0.95462	0.98437	1.0254	1.0665	1.101	1.125	1.1399	1.147	1.1473	1.142	1.1327	1.1212	1.109	1.0973	1.0872	1.0796	1.0753	1.0747	1.0777	1.0837	1.0923	1.103	1.1154	1.129	1.1432	1.1574	1.1713	1.1847	1.1974	1.2094	1.2205	1.2308	1.2401	1.2484	1.2558	1.2621	1.2673	1.2714
0.44036	0.45091	0.46743	0.51835	0.62345	0.76176	0.88644	0.96259	0.98796	0.97693	0.95874	0.94806	0.95478	0.98443	1.0253	1.0663	1.1006	1.1246	1.1395	1.1467	1.1472	1.1419	1.1327	1.1212	1.109	1.0974	1.0873	1.0798	1.0754	1.0749	1.0778	1.0838	1.0923	1.103	1.1155	1.1291	1.1432	1.1574	1.1712	1.1846	1.1973	1.2093	1.2204	1.2307	1.24	1.2484	1.2557	1.262	1.2672	1.2713
0.44067	0.45147	0.46877	0.52017	0.62516	0.76297	0.88704	0.96272	0.98786	0.97684	0.95877	0.94821	0.95497	0.98452	1.0252	1.066	1.1002	1.1242	1.1392	1.1465	1.147	1.1418	1.1327	1.1213	1.1091	1.0975	1.0875	1.0799	1.0755	1.075	1.0779	1.0839	1.0924	1.1031	1.1155	1.1291	1.1432	1.1574	1.1712	1.1846	1.1973	1.2092	1.2204	1.2306	1.2399	1.2483	1.2556	1.2619	1.2671	1.2713
0.44099	0.45203	0.47013	0.52203	0.6269	0.7642	0.88765	0.96285	0.98777	0.97676	0.95882	0.94839	0.95518	0.98464	1.0251	1.0657	1.0998	1.1238	1.1388	1.1462	1.1468	1.1417	1.1327	1.1213	1.1092	1.0976	1.0876	1.08	1.0757	1.0751	1.0781	1.084	1.0925	1.1032	1.1156	1.1291	1.1432	1.1573	1.1712	1.1845	1.1972	1.2091	1.2203	1.2305	1.2398	1.2482	1.2555	1.2618	1.2671	1.2712
0.44131	0.4526	0.47151	0.52391	0.62866	0.76543	0.88825	0.96298	0.98768	0.9767	0.95889	0.94858	0.95542	0.98477	1.0251	1.0655	1.0995	1.1234	1.1384	1.1459	1.1466	1.1417	1.1327	1.1214	1.1093	1.0978	1.0878	1.0802	1.0759	1.0753	1.0782	1.0841	1.0926	1.1033	1.1156	1.1291	1.1432	1.1573	1.1711	1.1845	1.1971	1.2091	1.2202	1.2304	1.2397	1.2481	1.2554	1.2618	1.267	1.2712
0.44164	0.45317	0.4729	0.52582	0.63044	0.76666	0.88885	0.96311	0.9876	0.97665	0.95898	0.94881	0.95568	0.98492	1.025	1.0653	1.0991	1.123	1.1381	1.1456	1.1465	1.1416	1.1327	1.1214	1.1094	1.0979	1.0879	1.0804	1.0761	1.0755	1.0784	1.0843	1.0928	1.1034	1.1157	1.1292	1.1433	1.1573	1.1711	1.1844	1.1971	1.209	1.2201	1.2303	1.2397	1.248	1.2554	1.2617	1.267	1.2711
0.44197	0.45375	0.47432	0.52775	0.63224	0.76791	0.88946	0.96323	0.98752	0.97661	0.95909	0.94905	0.95597	0.9851	1.025	1.0651	1.0988	1.1226	1.1378	1.1454	1.1463	1.1415	1.1327	1.1215	1.1095	1.0981	1.0881	1.0806	1.0763	1.0757	1.0786	1.0845	1.0929	1.1035	1.1158	1.1292	1.1433	1.1573	1.1711	1.1844	1.197	1.2089	1.22	1.2303	1.2396	1.2479	1.2553	1.2616	1.2669	1.2711
0.44229	0.45433	0.47575	0.52971	0.63407	0.76917	0.89006	0.96336	0.98745	0.97659	0.95921	0.94932	0.95628	0.9853	1.025	1.0649	1.0984	1.1223	1.1374	1.1451	1.1461	1.1414	1.1327	1.1216	1.1097	1.0982	1.0883	1.0808	1.0765	1.0759	1.0788	1.0846	1.0931	1.1036	1.1159	1.1293	1.1433	1.1573	1.1711	1.1843	1.197	1.2089	1.22	1.2302	1.2395	1.2478	1.2552	1.2615	1.2668	1.271
0.44263	0.45492	0.4772	0.5317	0.63591	0.77043	0.89066	0.96349	0.98738	0.97658	0.95936	0.94961	0.95661	0.98552	1.025	1.0647	1.0981	1.1219	1.1371	1.1448	1.146	1.1413	1.1327	1.1216	1.1098	1.0984	1.0885	1.081	1.0767	1.0761	1.079	1.0848	1.0932	1.1038	1.116	1.1294	1.1434	1.1573	1.1711	1.1843	1.1969	1.2088	1.2199	1.2301	1.2394	1.2478	1.2551	1.2615	1.2668	1.271
0.44296	0.45551	0.47867	0.53371	0.63777	0.7717	0.89126	0.96361	0.98731	0.97658	0.95952	0.94993	0.95697	0.98575	1.0251	1.0645	1.0978	1.1215	1.1367	1.1446	1.1458	1.1413	1.1327	1.1217	1.1099	1.0986	1.0887	1.0813	1.077	1.0764	1.0792	1.085	1.0934	1.1039	1.1161	1.1295	1.1434	1.1574	1.171	1.1843	1.1968	1.2087	1.2198	1.23	1.2393	1.2477	1.255	1.2614	1.2667	1.2709
0.4433	0.45611	0.48016	0.53575	0.63966	0.77299	0.89186	0.96373	0.98725	0.97659	0.95971	0.95026	0.95735	0.98601	1.0251	1.0644	1.0975	1.1211	1.1364	1.1443	1.1456	1.1412	1.1327	1.1218	1.1101	1.0988	1.089	1.0815	1.0772	1.0766	1.0795	1.0853	1.0936	1.1041	1.1162	1.1295	1.1435	1.1574	1.171	1.1842	1.1968	1.2087	1.2197	1.2299	1.2392	1.2476	1.255	1.2613	1.2666	1.2709
0.44364	0.45671	0.48166	0.53781	0.64157	0.77428	0.89246	0.96385	0.9872	0.97662	0.95991	0.95062	0.95775	0.98629	1.0252	1.0642	1.0972	1.1208	1.1361	1.1441	1.1455	1.1411	1.1327	1.1219	1.1102	1.099	1.0892	1.0818	1.0775	1.0769	1.0797	1.0855	1.0938	1.1042	1.1164	1.1296	1.1435	1.1574	1.171	1.1842	1.1967	1.2086	1.2196	1.2298	1.2391	1.2475	1.2549	1.2613	1.2666	1.2708
0.44398	0.45731	0.48318	0.5399	0.64349	0.77557	0.89306	0.96398	0.98714	0.97666	0.96013	0.951	0.95818	0.98659	1.0253	1.0641	1.0969	1.1204	1.1357	1.1438	1.1453	1.1411	1.1327	1.122	1.1104	1.0992	1.0895	1.0821	1.0778	1.0772	1.08	1.0857	1.094	1.1044	1.1165	1.1297	1.1436	1.1574	1.171	1.1842	1.1967	1.2085	1.2196	1.2298	1.2391	1.2474	1.2548	1.2612	1.2665	1.2708
0.44432	0.45793	0.48472	0.54201	0.64544	0.77688	0.89366	0.9641	0.98709	0.97671	0.96037	0.9514	0.95863	0.98691	1.0253	1.0639	1.0966	1.1201	1.1354	1.1435	1.1451	1.141	1.1327	1.1221	1.1106	1.0994	1.0897	1.0824	1.0781	1.0775	1.0803	1.086	1.0942	1.1046	1.1167	1.1299	1.1436	1.1575	1.171	1.1841	1.1967	1.2085	1.2195	1.2297	1.239	1.2473	1.2547	1.2611	1.2665	1.2708
0.44467	0.45854	0.48627	0.54415	0.6474	0.77819	0.89426	0.96421	0.98705	0.97677	0.96063	0.95183	0.95909	0.98724	1.0255	1.0638	1.0963	1.1197	1.1351	1.1433	1.145	1.1409	1.1328	1.1222	1.1108	1.0997	1.09	1.0827	1.0784	1.0778	1.0806	1.0863	1.0945	1.1048	1.1168	1.13	1.1437	1.1575	1.171	1.1841	1.1966	1.2084	1.2194	1.2296	1.2389	1.2473	1.2546	1.261	1.2664	1.2707
0.44502	0.45916	0.48784	0.54631	0.64938	0.77951	0.89486	0.96433	0.98701	0.97684	0.9609	0.95227	0.95959	0.9876	1.0256	1.0637	1.096	1.1194	1.1347	1.143	1.1448	1.1408	1.1328	1.1223	1.1109	1.0999	1.0903	1.083	1.0787	1.0781	1.0809	1.0866	1.0947	1.105	1.117	1.1301	1.1438	1.1576	1.1711	1.1841	1.1966	1.2084	1.2194	1.2295	1.2388	1.2472	1.2546	1.261	1.2663	1.2707
0.44537	0.45979	0.48943	0.54849	0.65139	0.78084	0.89546	0.96445	0.98698	0.97693	0.96119	0.95274	0.9601	0.98798	1.0257	1.0636	1.0958	1.1191	1.1344	1.1428	1.1446	1.1408	1.1328	1.1224	1.1111	1.1002	1.0906	1.0833	1.0791	1.0785	1.0812	1.0869	1.095	1.1053	1.1172	1.1302	1.1439	1.1576	1.1711	1.1841	1.1965	1.2083	1.2193	1.2294	1.2387	1.2471	1.2545	1.2609	1.2663	1.2706
0.44572	0.46041	0.49104	0.5507	0.65341	0.78218	0.89605	0.96456	0.98694	0.97702	0.9615	0.95323	0.96063	0.98837	1.0259	1.0635	1.0955	1.1187	1.1341	1.1425	1.1445	1.1407	1.1328	1.1226	1.1113	1.1004	1.0909	1.0836	1.0794	1.0788	1.0815	1.0872	1.0953	1.1055	1.1174	1.1304	1.144	1.1577	1.1711	1.1841	1.1965	1.2082	1.2192	1.2294	1.2386	1.247	1.2544	1.2608	1.2662	1.2706
0.44608	0.46105	0.49266	0.55293	0.65545	0.78353	0.89665	0.96468	0.98692	0.97713	0.96183	0.95374	0.96119	0.98879	1.0261	1.0635	1.0952	1.1184	1.1338	1.1423	1.1443	1.1407	1.1329	1.1227	1.1115	1.1007	1.0912	1.084	1.0798	1.0792	1.0819	1.0875	1.0956	1.1057	1.1176	1.1305	1.1441	1.1577	1.1711	1.1841	1.1965	1.2082	1.2192	1.2293	1.2386	1.2469	1.2543	1.2608	1.2662	1.2705
0.44644	0.46168	0.49429	0.55519	0.65751	0.78488	0.89725	0.96479	0.98689	0.97725	0.96218	0.95426	0.96177	0.98922	1.0262	1.0634	1.095	1.1181	1.1335	1.142	1.1442	1.1406	1.1329	1.1228	1.1117	1.101	1.0916	1.0844	1.0802	1.0796	1.0823	1.0878	1.0959	1.106	1.1178	1.1307	1.1442	1.1578	1.1711	1.1841	1.1964	1.2081	1.2191	1.2292	1.2385	1.2468	1.2543	1.2607	1.2661	1.2705
0.4468	0.46233	0.49595	0.55746	0.65959	0.78624	0.89784	0.96491	0.98687	0.97738	0.96254	0.95481	0.96236	0.98967	1.0264	1.0633	1.0947	1.1177	1.1331	1.1418	1.144	1.1405	1.133	1.1229	1.112	1.1013	1.0919	1.0847	1.0806	1.08	1.0826	1.0882	1.0962	1.1063	1.118	1.1308	1.1443	1.1579	1.1712	1.1841	1.1964	1.2081	1.219	1.2291	1.2384	1.2468	1.2542	1.2606	1.266	1.2704
0.44716	0.46297	0.49761	0.55976	0.66169	0.78761	0.89844	0.96502	0.98686	0.97752	0.96292	0.95538	0.96298	0.99014	1.0267	1.0633	1.0945	1.1174	1.1328	1.1415	1.1438	1.1405	1.133	1.1231	1.1122	1.1016	1.0922	1.0851	1.081	1.0804	1.083	1.0885	1.0965	1.1065	1.1182	1.131	1.1444	1.1579	1.1712	1.1841	1.1964	1.208	1.219	1.2291	1.2383	1.2467	1.2541	1.2606	1.266	1.2704
0.44753	0.46362	0.4993	0.56209	0.6638	0.78898	0.89903	0.96513	0.98685	0.97767	0.96331	0.95597	0.96362	0.99062	1.0269	1.0633	1.0943	1.1171	1.1325	1.1413	1.1437	1.1404	1.1331	1.1232	1.1124	1.1019	1.0926	1.0855	1.0814	1.0808	1.0834	1.0889	1.0968	1.1068	1.1184	1.1312	1.1446	1.158	1.1712	1.1841	1.1964	1.208	1.2189	1.229	1.2382	1.2466	1.254	1.2605	1.2659	1.2704
0.4479	0.46428	0.501	0.56443	0.66593	0.79036	0.89963	0.96524	0.98684	0.97783	0.96372	0.95658	0.96428	0.99113	1.0271	1.0632	1.0941	1.1168	1.1322	1.141	1.1435	1.1404	1.1331	1.1234	1.1127	1.1022	1.093	1.0859	1.0818	1.0812	1.0839	1.0893	1.0972	1.1071	1.1187	1.1314	1.1447	1.1581	1.1713	1.1841	1.1963	1.2079	1.2188	1.2289	1.2382	1.2465	1.254	1.2604	1.2659	1.2703
0.44827	0.46493	0.50271	0.5668	0.66808	0.79175	0.90022	0.96535	0.98683	0.97801	0.96415	0.95721	0.96495	0.99165	1.0274	1.0632	1.0939	1.1165	1.1319	1.1408	1.1434	1.1403	1.1332	1.1235	1.1129	1.1025	1.0934	1.0864	1.0823	1.0817	1.0843	1.0897	1.0975	1.1074	1.1189	1.1316	1.1448	1.1582	1.1713	1.1841	1.1963	1.2079	1.2188	1.2288	1.2381	1.2464	1.2539	1.2603	1.2658	1.2703
0.44864	0.4656	0.50444	0.56918	0.67025	0.79315	0.90082	0.96546	0.98683	0.97819	0.96459	0.95785	0.96565	0.99219	1.0277	1.0632	1.0936	1.1162	1.1316	1.1405	1.1432	1.1403	1.1332	1.1237	1.1132	1.1028	1.0938	1.0868	1.0827	1.0821	1.0847	1.0901	1.0979	1.1077	1.1192	1.1318	1.145	1.1583	1.1714	1.1841	1.1963	1.2079	1.2187	1.2288	1.238	1.2464	1.2538	1.2603	1.2658	1.2702
0.44901	0.46626	0.50618	0.57159	0.67244	0.79455	0.90141	0.96556	0.98683	0.97838	0.96505	0.95852	0.96637	0.99274	1.0279	1.0632	1.0934	1.1159	1.1313	1.1403	1.1431	1.1402	1.1333	1.1239	1.1134	1.1032	1.0942	1.0872	1.0832	1.0826	1.0852	1.0905	1.0983	1.1081	1.1194	1.132	1.1451	1.1584	1.1714	1.1841	1.1963	1.2078	1.2186	1.2287	1.2379	1.2463	1.2537	1.2602	1.2657	1.2702
0.44939	0.46693	0.50794	0.57402	0.67464	0.79596	0.902	0.96567	0.98684	0.97859	0.96552	0.9592	0.96711	0.99332	1.0282	1.0633	1.0932	1.1156	1.131	1.14	1.1429	1.1402	1.1333	1.124	1.1137	1.1035	1.0946	1.0877	1.0837	1.0831	1.0856	1.091	1.0987	1.1084	1.1197	1.1322	1.1453	1.1585	1.1715	1.1841	1.1963	1.2078	1.2186	1.2286	1.2379	1.2462	1.2536	1.2601	1.2656	1.2701
0.44977	0.46761	0.50971	0.57647	0.67686	0.79738	0.90259	0.96578	0.98685	0.9788	0.96601	0.95991	0.96786	0.99391	1.0286	1.0633	1.0931	1.1153	1.1307	1.1398	1.1428	1.1401	1.1334	1.1242	1.1139	1.1039	1.095	1.0882	1.0842	1.0836	1.0861	1.0914	1.0991	1.1087	1.12	1.1324	1.1454	1.1586	1.1715	1.1841	1.1962	1.2077	1.2185	1.2286	1.2378	1.2461	1.2536	1.2601	1.2656	1.2701
0.45015	0.46828	0.5115	0.57894	0.67909	0.7988	0.90318	0.96588	0.98687	0.97903	0.96652	0.96063	0.96863	0.99451	1.0289	1.0633	1.0929	1.115	1.1304	1.1395	1.1426	1.1401	1.1335	1.1244	1.1142	1.1042	1.0954	1.0886	1.0847	1.0841	1.0866	1.0919	1.0995	1.1091	1.1203	1.1326	1.1456	1.1587	1.1716	1.1842	1.1962	1.2077	1.2185	1.2285	1.2377	1.246	1.2535	1.26	1.2655	1.2701
0.45053	0.46897	0.5133	0.58144	0.68134	0.80023	0.90378	0.96598	0.98688	0.97926	0.96704	0.96137	0.96943	0.99513	1.0292	1.0634	1.0927	1.1148	1.1301	1.1393	1.1425	1.14	1.1335	1.1245	1.1145	1.1046	1.0959	1.0891	1.0852	1.0846	1.0871	1.0923	1.0999	1.1095	1.1206	1.1329	1.1458	1.1588	1.1717	1.1842	1.1962	1.2077	1.2184	1.2284	1.2376	1.246	1.2534	1.2599	1.2655	1.27
0.45091	0.46965	0.51512	0.58395	0.68361	0.80167	0.90437	0.96609	0.9869	0.97951	0.96758	0.96212	0.97024	0.99577	1.0296	1.0634	1.0925	1.1145	1.1298	1.1391	1.1423	1.14	1.1336	1.1247	1.1148	1.105	1.0963	1.0896	1.0857	1.0851	1.0876	1.0928	1.1003	1.1098	1.1209	1.1331	1.1459	1.1589	1.1717	1.1842	1.1962	1.2076	1.2184	1.2284	1.2375	1.2459	1.2533	1.2599	1.2654	1.27
0.4513	0.47034	0.51694	0.58648	0.68589	0.80312	0.90496	0.96619	0.98693	0.97976	0.96813	0.9629	0.97106	0.99643	1.0299	1.0635	1.0924	1.1142	1.1295	1.1388	1.1422	1.14	1.1337	1.1249	1.1151	1.1054	1.0968	1.0901	1.0863	1.0857	1.0882	1.0933	1.1008	1.1102	1.1212	1.1333	1.1461	1.159	1.1718	1.1842	1.1962	1.2076	1.2183	1.2283	1.2375	1.2458	1.2533	1.2598	1.2654	1.2699
0.45169	0.47103	0.51879	0.58903	0.68819	0.80457	0.90555	0.96629	0.98695	0.98002	0.96869	0.96369	0.97191	0.9971	1.0303	1.0635	1.0922	1.1139	1.1292	1.1386	1.142	1.1399	1.1338	1.1251	1.1154	1.1058	1.0972	1.0907	1.0868	1.0862	1.0887	1.0938	1.1012	1.1106	1.1215	1.1336	1.1463	1.1591	1.1719	1.1843	1.1962	1.2076	1.2183	1.2282	1.2374	1.2457	1.2532	1.2597	1.2653	1.2699
0.45208	0.47173	0.52064	0.5916	0.69051	0.80602	0.90614	0.96639	0.98699	0.9803	0.96927	0.9645	0.97277	0.99778	1.0307	1.0636	1.0921	1.1137	1.129	1.1383	1.1419	1.1399	1.1338	1.1253	1.1157	1.1062	1.0977	1.0912	1.0874	1.0868	1.0892	1.0943	1.1017	1.111	1.1218	1.1338	1.1465	1.1593	1.1719	1.1843	1.1962	1.2075	1.2182	1.2282	1.2373	1.2457	1.2531	1.2597	1.2653	1.2699
0.45247	0.47243	0.52251	0.59419	0.69284	0.80749	0.90673	0.96649	0.98702	0.98058	0.96986	0.96533	0.97365	0.99848	1.0311	1.0637	1.0919	1.1134	1.1287	1.1381	1.1417	1.1398	1.1339	1.1255	1.116	1.1066	1.0982	1.0917	1.0879	1.0874	1.0898	1.0948	1.1021	1.1114	1.1222	1.1341	1.1467	1.1594	1.172	1.1843	1.1962	1.2075	1.2182	1.2281	1.2373	1.2456	1.2531	1.2596	1.2652	1.2698
0.45286	0.47313	0.52439	0.5968	0.69518	0.80895	0.90731	0.96659	0.98706	0.98087	0.97047	0.96617	0.97455	0.9992	1.0315	1.0638	1.0918	1.1131	1.1284	1.1379	1.1416	1.1398	1.134	1.1257	1.1163	1.107	1.0987	1.0923	1.0885	1.088	1.0904	1.0954	1.1026	1.1118	1.1225	1.1344	1.1469	1.1595	1.1721	1.1844	1.1962	1.2075	1.2181	1.228	1.2372	1.2455	1.253	1.2595	1.2651	1.2698
0.45326	0.47384	0.52629	0.59942	0.69754	0.81043	0.9079	0.96669	0.9871	0.98117	0.97109	0.96703	0.97547	0.99993	1.0319	1.0639	1.0916	1.1129	1.1281	1.1376	1.1414	1.1398	1.1341	1.1259	1.1166	1.1074	1.0992	1.0928	1.0891	1.0886	1.0909	1.0959	1.1031	1.1122	1.1229	1.1347	1.1471	1.1597	1.1722	1.1844	1.1962	1.2074	1.2181	1.228	1.2371	1.2454	1.2529	1.2595	1.2651	1.2697
0.45365	0.47455	0.5282	0.60207	0.69992	0.81191	0.90849	0.96678	0.98714	0.98148	0.97172	0.9679	0.9764	1.0007	1.0324	1.064	1.0915	1.1126	1.1278	1.1374	1.1413	1.1397	1.1342	1.1261	1.117	1.1078	1.0997	1.0934	1.0897	1.0892	1.0915	1.0964	1.1036	1.1126	1.1232	1.1349	1.1473	1.1598	1.1723	1.1844	1.1962	1.2074	1.218	1.2279	1.237	1.2454	1.2528	1.2594	1.265	1.2697
0.45405	0.47526	0.53012	0.60473	0.70231	0.8134	0.90908	0.96688	0.98719	0.9818	0.97237	0.96879	0.97735	1.0014	1.0328	1.0642	1.0914	1.1124	1.1276	1.1372	1.1411	1.1397	1.1343	1.1263	1.1173	1.1083	1.1002	1.094	1.0903	1.0898	1.0921	1.097	1.1041	1.1131	1.1236	1.1352	1.1475	1.16	1.1724	1.1845	1.1962	1.2074	1.218	1.2278	1.237	1.2453	1.2528	1.2593	1.265	1.2697
0.45445	0.47598	0.53205	0.60741	0.70471	0.81489	0.90967	0.96697	0.98724	0.98212	0.97303	0.9697	0.97831	1.0022	1.0333	1.0643	1.0913	1.1121	1.1273	1.1369	1.141	1.1397	1.1344	1.1266	1.1176	1.1087	1.1008	1.0946	1.091	1.0904	1.0927	1.0976	1.1046	1.1135	1.124	1.1355	1.1477	1.1601	1.1724	1.1845	1.1962	1.2074	1.2179	1.2278	1.2369	1.2452	1.2527	1.2593	1.2649	1.2696
0.45486	0.4767	0.53399	0.61011	0.70713	0.81639	0.91025	0.96707	0.98729	0.98246	0.9737	0.97062	0.97929	1.003	1.0337	1.0644	1.0911	1.1119	1.127	1.1367	1.1408	1.1396	1.1345	1.1268	1.118	1.1092	1.1013	1.0952	1.0916	1.091	1.0934	1.0982	1.1051	1.114	1.1243	1.1358	1.1479	1.1603	1.1725	1.1846	1.1962	1.2073	1.2179	1.2277	1.2368	1.2451	1.2526	1.2592	1.2649	1.2696
0.45526	0.47742	0.53595	0.61283	0.70956	0.81789	0.91084	0.96716	0.98735	0.9828	0.97439	0.97156	0.98029	1.0038	1.0342	1.0646	1.091	1.1117	1.1267	1.1365	1.1407	1.1396	1.1346	1.127	1.1183	1.1096	1.1018	1.0958	1.0922	1.0917	1.094	1.0987	1.1057	1.1144	1.1247	1.1361	1.1482	1.1604	1.1726	1.1846	1.1962	1.2073	1.2178	1.2276	1.2367	1.2451	1.2525	1.2591	1.2648	1.2695
0.45567	0.47815	0.53792	0.61556	0.71201	0.8194	0.91142	0.96726	0.98741	0.98316	0.97509	0.97252	0.9813	1.0046	1.0347	1.0647	1.0909	1.1114	1.1265	1.1362	1.1405	1.1396	1.1347	1.1273	1.1187	1.1101	1.1024	1.0964	1.0929	1.0924	1.0946	1.0993	1.1062	1.1149	1.1251	1.1364	1.1484	1.1606	1.1727	1.1847	1.1962	1.2073	1.2178	1.2276	1.2367	1.245	1.2525	1.2591	1.2648	1.2695
0.45608	0.47888	0.5399	0.61831	0.71447	0.82092	0.91201	0.96735	0.98747	0.98352	0.9758	0.97348	0.98232	1.0054	1.0352	1.0649	1.0908	1.1112	1.1262	1.136	1.1404	1.1396	1.1348	1.1275	1.119	1.1106	1.103	1.097	1.0935	1.093	1.0953	1.0999	1.1068	1.1154	1.1255	1.1367	1.1486	1.1608	1.1728	1.1847	1.1962	1.2073	1.2177	1.2275	1.2366	1.2449	1.2524	1.259	1.2647	1.2695
0.45648	0.47961	0.54189	0.62108	0.71694	0.82244	0.9126	0.96744	0.98753	0.98388	0.97652	0.97447	0.98336	1.0063	1.0357	1.0651	1.0907	1.1109	1.1259	1.1358	1.1403	1.1395	1.1349	1.1277	1.1194	1.111	1.1035	1.0977	1.0942	1.0937	1.0959	1.1006	1.1073	1.1159	1.1259	1.137	1.1489	1.1609	1.173	1.1848	1.1962	1.2072	1.2177	1.2275	1.2365	1.2448	1.2523	1.259	1.2647	1.2694
0.4569	0.48035	0.54389	0.62386	0.71943	0.82397	0.91318	0.96753	0.9876	0.98426	0.97726	0.97546	0.98442	1.0071	1.0362	1.0652	1.0907	1.1107	1.1257	1.1355	1.1401	1.1395	1.135	1.128	1.1198	1.1115	1.1041	1.0983	1.0949	1.0944	1.0966	1.1012	1.1079	1.1164	1.1263	1.1374	1.1491	1.1611	1.1731	1.1848	1.1963	1.2072	1.2176	1.2274	1.2365	1.2448	1.2523	1.2589	1.2646	1.2694
0.45731	0.48109	0.54591	0.62666	0.72193	0.8255	0.91377	0.96762	0.98767	0.98464	0.97801	0.97648	0.98549	1.008	1.0368	1.0654	1.0906	1.1105	1.1254	1.1353	1.14	1.1395	1.1351	1.1282	1.1202	1.112	1.1047	1.099	1.0956	1.0951	1.0973	1.1018	1.1084	1.1169	1.1267	1.1377	1.1494	1.1613	1.1732	1.1849	1.1963	1.2072	1.2176	1.2273	1.2364	1.2447	1.2522	1.2588	1.2646	1.2693
0.45772	0.48183	0.54793	0.62947	0.72444	0.82704	0.91435	0.96771	0.98774	0.98504	0.97877	0.9775	0.98658	1.0089	1.0373	1.0656	1.0905	1.1103	1.1251	1.1351	1.1398	1.1395	1.1352	1.1285	1.1205	1.1125	1.1053	1.0996	1.0963	1.0958	1.098	1.1025	1.109	1.1174	1.1271	1.138	1.1496	1.1614	1.1733	1.1849	1.1963	1.2072	1.2175	1.2273	1.2363	1.2446	1.2521	1.2588	1.2645	1.2693
0.45814	0.48257	0.54997	0.6323	0.72696	0.82858	0.91493	0.9678	0.98782	0.98543	0.97954	0.97854	0.98768	1.0098	1.0378	1.0658	1.0904	1.11	1.1249	1.1349	1.1397	1.1394	1.1353	1.1287	1.1209	1.113	1.1059	1.1003	1.097	1.0965	1.0986	1.1031	1.1096	1.1179	1.1276	1.1384	1.1499	1.1616	1.1734	1.185	1.1963	1.2072	1.2175	1.2272	1.2363	1.2445	1.252	1.2587	1.2644	1.2693
0.45856	0.48332	0.55201	0.63515	0.7295	0.83013	0.91552	0.96789	0.9879	0.98584	0.98032	0.97959	0.98879	1.0107	1.0384	1.066	1.0903	1.1098	1.1246	1.1346	1.1396	1.1394	1.1354	1.129	1.1213	1.1135	1.1065	1.101	1.0977	1.0972	1.0993	1.1038	1.1102	1.1184	1.128	1.1387	1.1501	1.1618	1.1735	1.1851	1.1963	1.2072	1.2175	1.2272	1.2362	1.2445	1.252	1.2586	1.2644	1.2692
0.45897	0.48407	0.55407	0.63801	0.73205	0.83168	0.9161	0.96798	0.98798	0.98625	0.98111	0.98066	0.98992	1.0116	1.039	1.0662	1.0903	1.1096	1.1244	1.1344	1.1394	1.1394	1.1355	1.1292	1.1217	1.114	1.1071	1.1017	1.0984	1.098	1.1001	1.1044	1.1108	1.1189	1.1284	1.1391	1.1504	1.162	1.1736	1.1851	1.1963	1.2071	1.2174	1.2271	1.2361	1.2444	1.2519	1.2586	1.2643	1.2692
0.4594	0.48483	0.55614	0.64089	0.73461	0.83323	0.91668	0.96807	0.98806	0.98668	0.98192	0.98174	0.99106	1.0125	1.0396	1.0665	1.0902	1.1094	1.1241	1.1342	1.1393	1.1394	1.1356	1.1295	1.1221	1.1145	1.1077	1.1023	1.0992	1.0987	1.1008	1.1051	1.1114	1.1194	1.1289	1.1394	1.1506	1.1622	1.1738	1.1852	1.1964	1.2071	1.2174	1.227	1.236	1.2443	1.2518	1.2585	1.2643	1.2692
0.45982	0.48558	0.55821	0.64378	0.73718	0.8348	0.91727	0.96815	0.98815	0.9871	0.98273	0.98283	0.99221	1.0135	1.0401	1.0667	1.0902	1.1092	1.1238	1.134	1.1391	1.1394	1.1358	1.1297	1.1225	1.1151	1.1083	1.103	1.0999	1.0995	1.1015	1.1058	1.112	1.12	1.1293	1.1398	1.1509	1.1624	1.1739	1.1853	1.1964	1.2071	1.2173	1.227	1.236	1.2443	1.2518	1.2584	1.2642	1.2691
0.46024	0.48634	0.5603	0.64668	0.73977	0.83636	0.91785	0.96824	0.98823	0.98754	0.98356	0.98394	0.99338	1.0144	1.0407	1.0669	1.0901	1.109	1.1236	1.1337	1.139	1.1393	1.1359	1.13	1.1229	1.1156	1.109	1.1037	1.1007	1.1002	1.1022	1.1065	1.1127	1.1205	1.1298	1.1401	1.1512	1.1626	1.174	1.1853	1.1964	1.2071	1.2173	1.2269	1.2359	1.2442	1.2517	1.2584	1.2642	1.2691
0.46066	0.4871	0.5624	0.6496	0.74236	0.83793	0.91843	0.96833	0.98833	0.98798	0.9844	0.98505	0.99456	1.0154	1.0414	1.0672	1.0901	1.1088	1.1233	1.1335	1.1389	1.1393	1.136	1.1303	1.1233	1.1161	1.1096	1.1045	1.1014	1.101	1.103	1.1072	1.1133	1.1211	1.1303	1.1405	1.1515	1.1628	1.1741	1.1854	1.1964	1.2071	1.2173	1.2269	1.2358	1.2441	1.2516	1.2583	1.2641	1.2691
0.46109	0.48786	0.5645	0.65253	0.74497	0.83951	0.91901	0.96841	0.98842	0.98843	0.98524	0.98618	0.99575	1.0164	1.042	1.0674	1.09	1.1086	1.1231	1.1333	1.1387	1.1393	1.1361	1.1305	1.1237	1.1167	1.1102	1.1052	1.1022	1.1017	1.1037	1.1079	1.1139	1.1216	1.1307	1.1409	1.1518	1.163	1.1743	1.1855	1.1965	1.2071	1.2172	1.2268	1.2358	1.244	1.2516	1.2583	1.2641	1.269
0.46152	0.48863	0.56662	0.65548	0.74758	0.84109	0.9196	0.96849	0.98851	0.98889	0.9861	0.98733	0.99695	1.0174	1.0426	1.0677	1.09	1.1084	1.1228	1.1331	1.1386	1.1393	1.1363	1.1308	1.1241	1.1172	1.1109	1.1059	1.103	1.1025	1.1045	1.1086	1.1146	1.1222	1.1312	1.1413	1.152	1.1632	1.1744	1.1856	1.1965	1.2071	1.2172	1.2268	1.2357	1.244	1.2515	1.2582	1.264	1.269
0.46195	0.4894	0.56874	0.65843	0.75021	0.84267	0.92018	0.96858	0.98861	0.98935	0.98696	0.98848	0.99817	1.0184	1.0432	1.0679	1.09	1.1082	1.1226	1.1328	1.1385	1.1393	1.1364	1.1311	1.1246	1.1178	1.1115	1.1066	1.1037	1.1033	1.1053	1.1093	1.1152	1.1228	1.1317	1.1416	1.1523	1.1634	1.1745	1.1856	1.1965	1.2071	1.2172	1.2267	1.2356	1.2439	1.2514	1.2581	1.264	1.2689
0.46238	0.49017	0.57088	0.66141	0.75285	0.84426	0.92076	0.96866	0.98871	0.98982	0.98784	0.98964	0.9994	1.0194	1.0439	1.0682	1.0899	1.108	1.1223	1.1326	1.1383	1.1393	1.1365	1.1314	1.125	1.1183	1.1122	1.1074	1.1045	1.1041	1.106	1.11	1.1159	1.1233	1.1321	1.142	1.1526	1.1636	1.1747	1.1857	1.1966	1.2071	1.2171	1.2267	1.2356	1.2438	1.2513	1.2581	1.2639	1.2689
0.46281	0.49094	0.57302	0.66439	0.7555	0.84586	0.92134	0.96874	0.98881	0.99029	0.98873	0.99082	1.0006	1.0204	1.0445	1.0685	1.0899	1.1078	1.1221	1.1324	1.1382	1.1393	1.1367	1.1317	1.1254	1.1189	1.1129	1.1081	1.1053	1.1049	1.1068	1.1108	1.1165	1.1239	1.1326	1.1424	1.1529	1.1638	1.1748	1.1858	1.1966	1.2071	1.2171	1.2266	1.2355	1.2438	1.2513	1.258	1.2639	1.2689
0.46324	0.49172	0.57517	0.66739	0.75816	0.84745	0.92192	0.96883	0.98892	0.99077	0.98962	0.99201	1.0019	1.0214	1.0452	1.0687	1.0899	1.1076	1.1218	1.1322	1.1381	1.1392	1.1368	1.1319	1.1258	1.1194	1.1136	1.1089	1.1061	1.1057	1.1076	1.1115	1.1172	1.1245	1.1331	1.1428	1.1532	1.164	1.175	1.1859	1.1966	1.207	1.2171	1.2265	1.2354	1.2437	1.2512	1.2579	1.2638	1.2688
0.46367	0.4925	0.57733	0.6704	0.76083	0.84905	0.9225	0.96891	0.98902	0.99126	0.99052	0.99321	1.0031	1.0224	1.0458	1.069	1.0898	1.1074	1.1216	1.132	1.1379	1.1392	1.1369	1.1322	1.1263	1.12	1.1142	1.1097	1.1069	1.1066	1.1084	1.1123	1.1179	1.1251	1.1336	1.1432	1.1535	1.1642	1.1751	1.186	1.1967	1.207	1.217	1.2265	1.2354	1.2436	1.2511	1.2579	1.2638	1.2688
0.46411	0.49328	0.5795	0.67342	0.76351	0.85066	0.92308	0.96899	0.98913	0.99175	0.99144	0.99442	1.0044	1.0235	1.0465	1.0693	1.0898	1.1072	1.1214	1.1318	1.1378	1.1392	1.1371	1.1325	1.1267	1.1206	1.1149	1.1104	1.1077	1.1074	1.1092	1.113	1.1186	1.1257	1.1341	1.1436	1.1538	1.1644	1.1753	1.1861	1.1967	1.207	1.217	1.2264	1.2353	1.2436	1.2511	1.2578	1.2637	1.2688
0.46454	0.49406	0.58168	0.67645	0.7662	0.85227	0.92366	0.96907	0.98924	0.99225	0.99236	0.99564	1.0057	1.0245	1.0472	1.0696	1.0898	1.107	1.1211	1.1315	1.1377	1.1392	1.1372	1.1328	1.1272	1.1212	1.1156	1.1112	1.1086	1.1082	1.11	1.1138	1.1193	1.1263	1.1346	1.144	1.1541	1.1647	1.1754	1.1861	1.1967	1.207	1.2169	1.2264	1.2353	1.2435	1.251	1.2578	1.2637	1.2687
0.46498	0.49485	0.58386	0.6795	0.76889	0.85388	0.92424	0.96915	0.98936	0.99275	0.99329	0.99687	1.007	1.0256	1.0479	1.0699	1.0898	1.1069	1.1209	1.1313	1.1375	1.1392	1.1373	1.1331	1.1276	1.1218	1.1163	1.112	1.1094	1.109	1.1108	1.1145	1.1199	1.1269	1.1351	1.1444	1.1544	1.1649	1.1755	1.1862	1.1968	1.207	1.2169	1.2263	1.2352	1.2434	1.2509	1.2577	1.2636	1.2687
0.46542	0.49563	0.58605	0.68255	0.7716	0.8555	0.92482	0.96923	0.98947	0.99326	0.99423	0.99811	1.0083	1.0267	1.0486	1.0702	1.0898	1.1067	1.1206	1.1311	1.1374	1.1392	1.1375	1.1334	1.1281	1.1223	1.117	1.1128	1.1102	1.1099	1.1117	1.1153	1.1206	1.1275	1.1356	1.1448	1.1547	1.1651	1.1757	1.1863	1.1968	1.207	1.2169	1.2263	1.2351	1.2433	1.2509	1.2576	1.2636	1.2687
0.46586	0.49642	0.58825	0.68562	0.77431	0.85712	0.9254	0.96931	0.98959	0.99377	0.99517	0.99935	1.0096	1.0278	1.0493	1.0705	1.0898	1.1065	1.1204	1.1309	1.1373	1.1392	1.1376	1.1337	1.1285	1.1229	1.1177	1.1136	1.1111	1.1107	1.1125	1.1161	1.1214	1.1281	1.1362	1.1452	1.1551	1.1653	1.1759	1.1864	1.1968	1.207	1.2169	1.2262	1.2351	1.2433	1.2508	1.2576	1.2635	1.2686
0.4663	0.49721	0.59046	0.6887	0.77704	0.85874	0.92598	0.96939	0.98971	0.99429	0.99613	1.0006	1.0109	1.0289	1.05	1.0708	1.0898	1.1063	1.1202	1.1307	1.1371	1.1392	1.1378	1.134	1.129	1.1235	1.1184	1.1144	1.1119	1.1116	1.1133	1.1169	1.1221	1.1287	1.1367	1.1456	1.1554	1.1656	1.176	1.1865	1.1969	1.207	1.2168	1.2262	1.235	1.2432	1.2507	1.2575	1.2635	1.2686
0.46674	0.49801	0.59268	0.69179	0.77977	0.86037	0.92656	0.96947	0.98983	0.99482	0.99709	1.0019	1.0123	1.03	1.0507	1.0711	1.0898	1.1062	1.1199	1.1305	1.137	1.1392	1.1379	1.1343	1.1294	1.1241	1.1191	1.1152	1.1128	1.1125	1.1142	1.1177	1.1228	1.1294	1.1372	1.1461	1.1557	1.1658	1.1762	1.1866	1.1969	1.207	1.2168	1.2261	1.2349	1.2431	1.2507	1.2575	1.2634	1.2686
0.46718	0.4988	0.5949	0.69489	0.78251	0.862	0.92713	0.96954	0.98995	0.99535	0.99806	1.0032	1.0136	1.0311	1.0514	1.0715	1.0898	1.106	1.1197	1.1302	1.1369	1.1392	1.1381	1.1346	1.1299	1.1247	1.1199	1.116	1.1136	1.1133	1.115	1.1184	1.1235	1.13	1.1377	1.1465	1.156	1.166	1.1763	1.1867	1.197	1.207	1.2168	1.2261	1.2349	1.2431	1.2506	1.2574	1.2634	1.2685
0.46763	0.4996	0.59713	0.698	0.78526	0.86363	0.92771	0.96962	0.99007	0.99588	0.99904	1.0044	1.015	1.0322	1.0522	1.0718	1.0898	1.1058	1.1195	1.13	1.1367	1.1392	1.1382	1.1349	1.1304	1.1253	1.1206	1.1168	1.1145	1.1142	1.1159	1.1192	1.1242	1.1306	1.1383	1.1469	1.1563	1.1663	1.1765	1.1868	1.197	1.207	1.2167	1.226	1.2348	1.243	1.2505	1.2573	1.2633	1.2685
0.46807	0.5004	0.59936	0.70111	0.78802	0.86527	0.92829	0.9697	0.9902	0.99642	1	1.0057	1.0163	1.0333	1.0529	1.0721	1.0898	1.1057	1.1192	1.1298	1.1366	1.1392	1.1384	1.1352	1.1308	1.126	1.1213	1.1176	1.1154	1.1151	1.1167	1.1201	1.125	1.1313	1.1388	1.1473	1.1567	1.1665	1.1766	1.1869	1.197	1.207	1.2167	1.226	1.2347	1.2429	1.2505	1.2573	1.2633	1.2685
0.46852	0.5012	0.6016	0.70424	0.79078	0.86691	0.92887	0.96977	0.99032	0.99697	1.001	1.007	1.0177	1.0344	1.0536	1.0725	1.0899	1.1055	1.119	1.1296	1.1365	1.1392	1.1385	1.1356	1.1313	1.1266	1.1221	1.1184	1.1162	1.116	1.1176	1.1209	1.1257	1.1319	1.1393	1.1478	1.157	1.1668	1.1768	1.187	1.1971	1.207	1.2167	1.2259	1.2347	1.2429	1.2504	1.2572	1.2632	1.2684
0.46896	0.502	0.60385	0.70738	0.79356	0.86855	0.92945	0.96985	0.99045	0.99752	1.002	1.0084	1.0191	1.0356	1.0544	1.0728	1.0899	1.1053	1.1188	1.1294	1.1363	1.1392	1.1387	1.1359	1.1318	1.1272	1.1228	1.1192	1.1171	1.1169	1.1184	1.1217	1.1264	1.1325	1.1399	1.1482	1.1573	1.167	1.177	1.1871	1.1971	1.207	1.2166	1.2259	1.2346	1.2428	1.2503	1.2571	1.2632	1.2684
0.46941	0.5028	0.60611	0.71053	0.79633	0.8702	0.93002	0.96993	0.99058	0.99807	1.003	1.0097	1.0205	1.0367	1.0551	1.0731	1.0899	1.1052	1.1185	1.1292	1.1362	1.1392	1.1388	1.1362	1.1323	1.1278	1.1235	1.1201	1.118	1.1178	1.1193	1.1225	1.1272	1.1332	1.1404	1.1487	1.1577	1.1672	1.1771	1.1872	1.1972	1.207	1.2166	1.2258	1.2346	1.2427	1.2503	1.2571	1.2631	1.2684
0.46986	0.50361	0.60837	0.71368	0.79912	0.87185	0.9306	0.97	0.99071	0.99863	1.004	1.011	1.0219	1.0379	1.0559	1.0735	1.0899	1.105	1.1183	1.129	1.1361	1.1392	1.139	1.1365	1.1327	1.1284	1.1243	1.1209	1.1189	1.1187	1.1202	1.1233	1.1279	1.1339	1.141	1.1491	1.158	1.1675	1.1773	1.1873	1.1972	1.207	1.2166	1.2258	1.2345	1.2427	1.2502	1.257	1.2631	1.2683
0.47031	0.50441	0.61064	0.71685	0.80191	0.8735	0.93118	0.97008	0.99085	0.99919	1.005	1.0123	1.0233	1.039	1.0566	1.0738	1.0899	1.1048	1.1181	1.1288	1.136	1.1392	1.1391	1.1368	1.1332	1.1291	1.125	1.1218	1.1198	1.1196	1.1211	1.1242	1.1287	1.1345	1.1415	1.1495	1.1584	1.1677	1.1775	1.1874	1.1973	1.207	1.2166	1.2257	1.2344	1.2426	1.2501	1.257	1.263	1.2683
0.47076	0.50522	0.61291	0.72002	0.80471	0.87515	0.93175	0.97015	0.99098	0.99975	1.0061	1.0137	1.0247	1.0402	1.0574	1.0742	1.09	1.1047	1.1178	1.1285	1.1358	1.1392	1.1393	1.1372	1.1337	1.1297	1.1258	1.1226	1.1207	1.1205	1.122	1.125	1.1294	1.1352	1.1421	1.15	1.1587	1.168	1.1776	1.1875	1.1973	1.207	1.2165	1.2257	1.2344	1.2425	1.2501	1.2569	1.263	1.2683
0.47121	0.50603	0.61519	0.7232	0.80752	0.87681	0.93233	0.97023	0.99112	1.0003	1.0071	1.015	1.0261	1.0414	1.0582	1.0746	1.09	1.1045	1.1176	1.1283	1.1357	1.1392	1.1394	1.1375	1.1342	1.1303	1.1266	1.1235	1.1216	1.1214	1.1229	1.1258	1.1302	1.1358	1.1426	1.1504	1.159	1.1682	1.1778	1.1876	1.1974	1.207	1.2165	1.2256	1.2343	1.2425	1.25	1.2568	1.2629	1.2682
0.47166	0.50684	0.61747	0.72639	0.81033	0.87847	0.93291	0.9703	0.99125	1.0009	1.0081	1.0164	1.0275	1.0426	1.059	1.0749	1.09	1.1044	1.1174	1.1281	1.1356	1.1392	1.1396	1.1378	1.1347	1.131	1.1273	1.1243	1.1225	1.1223	1.1238	1.1267	1.131	1.1365	1.1432	1.1509	1.1594	1.1685	1.178	1.1877	1.1974	1.2071	1.2165	1.2256	1.2342	1.2424	1.2499	1.2568	1.2629	1.2682
0.47211	0.50766	0.61976	0.72958	0.81315	0.88013	0.93348	0.97037	0.99139	1.0015	1.0092	1.0178	1.0289	1.0438	1.0597	1.0753	1.0901	1.1042	1.1172	1.1279	1.1355	1.1392	1.1397	1.1381	1.1352	1.1316	1.1281	1.1252	1.1234	1.1233	1.1247	1.1275	1.1317	1.1372	1.1438	1.1513	1.1597	1.1687	1.1781	1.1878	1.1975	1.2071	1.2165	1.2255	1.2342	1.2423	1.2499	1.2567	1.2628	1.2682
0.47257	0.50847	0.62205	0.73278	0.81598	0.8818	0.93406	0.97045	0.99153	1.0021	1.0102	1.0191	1.0304	1.0449	1.0605	1.0757	1.0901	1.1041	1.1169	1.1277	1.1353	1.1392	1.1399	1.1385	1.1357	1.1323	1.1289	1.126	1.1243	1.1242	1.1256	1.1284	1.1325	1.1379	1.1443	1.1518	1.1601	1.169	1.1783	1.1879	1.1975	1.2071	1.2164	1.2255	1.2341	1.2422	1.2498	1.2567	1.2628	1.2681
0.47302	0.50929	0.62435	0.73599	0.81881	0.88347	0.93464	0.97052	0.99167	1.0026	1.0113	1.0205	1.0318	1.0461	1.0613	1.076	1.0902	1.1039	1.1167	1.1275	1.1352	1.1392	1.1401	1.1388	1.1362	1.1329	1.1296	1.1269	1.1253	1.1251	1.1265	1.1292	1.1333	1.1385	1.1449	1.1523	1.1604	1.1693	1.1785	1.188	1.1976	1.2071	1.2164	1.2254	1.2341	1.2422	1.2497	1.2566	1.2628	1.2681
0.47347	0.5101	0.62666	0.73921	0.82164	0.88513	0.93521	0.97059	0.99182	1.0032	1.0123	1.0219	1.0333	1.0473	1.0621	1.0764	1.0902	1.1038	1.1165	1.1273	1.1351	1.1392	1.1402	1.1391	1.1367	1.1336	1.1304	1.1278	1.1262	1.1261	1.1274	1.1301	1.134	1.1392	1.1455	1.1527	1.1608	1.1695	1.1787	1.1881	1.1976	1.2071	1.2164	1.2254	1.234	1.2421	1.2497	1.2565	1.2627	1.2681
0.47393	0.51092	0.62896	0.74243	0.82449	0.88681	0.93579	0.97066	0.99196	1.0038	1.0134	1.0233	1.0347	1.0486	1.0629	1.0768	1.0902	1.1036	1.1163	1.1271	1.1349	1.1392	1.1404	1.1395	1.1372	1.1342	1.1312	1.1287	1.1271	1.127	1.1283	1.1309	1.1348	1.1399	1.1461	1.1532	1.1612	1.1698	1.1788	1.1882	1.1977	1.2071	1.2164	1.2253	1.2339	1.242	1.2496	1.2565	1.2627	1.268
0.47438	0.51174	0.63128	0.74566	0.82733	0.88848	0.93636	0.97074	0.9921	1.0044	1.0145	1.0247	1.0362	1.0498	1.0637	1.0772	1.0903	1.1035	1.116	1.1269	1.1348	1.1392	1.1405	1.1398	1.1377	1.1349	1.132	1.1295	1.1281	1.128	1.1292	1.1318	1.1356	1.1406	1.1466	1.1537	1.1615	1.17	1.179	1.1883	1.1977	1.2071	1.2163	1.2253	1.2339	1.242	1.2495	1.2564	1.2626	1.268
0.47484	0.51256	0.63359	0.7489	0.83018	0.89015	0.93694	0.97081	0.99225	1.005	1.0155	1.0261	1.0377	1.051	1.0645	1.0776	1.0903	1.1033	1.1158	1.1267	1.1347	1.1392	1.1407	1.1401	1.1382	1.1355	1.1328	1.1304	1.129	1.1289	1.1302	1.1327	1.1364	1.1413	1.1472	1.1541	1.1619	1.1703	1.1792	1.1884	1.1978	1.2071	1.2163	1.2252	1.2338	1.2419	1.2495	1.2564	1.2626	1.268
0.4753	0.51338	0.63591	0.75214	0.83304	0.89183	0.93751	0.97088	0.9924	1.0056	1.0166	1.0275	1.0391	1.0522	1.0653	1.0779	1.0904	1.1032	1.1156	1.1264	1.1346	1.1392	1.1409	1.1405	1.1387	1.1362	1.1335	1.1313	1.1299	1.1299	1.1311	1.1335	1.1372	1.142	1.1478	1.1546	1.1622	1.1706	1.1794	1.1885	1.1978	1.2071	1.2163	1.2252	1.2337	1.2418	1.2494	1.2563	1.2625	1.2679
0.47575	0.5142	0.63824	0.75539	0.8359	0.89351	0.93809	0.97095	0.99254	1.0062	1.0177	1.0289	1.0406	1.0534	1.0662	1.0783	1.0904	1.103	1.1154	1.1262	1.1344	1.1392	1.141	1.1408	1.1392	1.1368	1.1343	1.1322	1.1309	1.1308	1.132	1.1344	1.138	1.1427	1.1484	1.1551	1.1626	1.1708	1.1796	1.1886	1.1979	1.2071	1.2163	1.2251	1.2337	1.2418	1.2493	1.2563	1.2625	1.2679
0.47621	0.51503	0.64057	0.75864	0.83876	0.89519	0.93866	0.97102	0.99269	1.0068	1.0188	1.0303	1.0421	1.0547	1.067	1.0787	1.0905	1.1029	1.1151	1.126	1.1343	1.1392	1.1412	1.1411	1.1397	1.1375	1.1351	1.1331	1.1318	1.1318	1.1329	1.1353	1.1388	1.1434	1.149	1.1555	1.163	1.1711	1.1797	1.1887	1.1979	1.2071	1.2162	1.2251	1.2336	1.2417	1.2493	1.2562	1.2624	1.2679
0.47667	0.51585	0.6429	0.76189	0.84163	0.89687	0.93924	0.97109	0.99284	1.0074	1.0199	1.0317	1.0436	1.0559	1.0678	1.0791	1.0905	1.1027	1.1149	1.1258	1.1342	1.1392	1.1414	1.1415	1.1402	1.1382	1.1359	1.134	1.1328	1.1327	1.1339	1.1362	1.1396	1.1441	1.1496	1.156	1.1633	1.1713	1.1799	1.1889	1.198	1.2071	1.2162	1.2251	1.2336	1.2416	1.2492	1.2561	1.2624	1.2678
0.47713	0.51668	0.64523	0.76516	0.8445	0.89856	0.93981	0.97117	0.99299	1.008	1.021	1.0331	1.0451	1.0571	1.0686	1.0795	1.0906	1.1026	1.1147	1.1256	1.1341	1.1392	1.1415	1.1418	1.1407	1.1388	1.1367	1.1349	1.1337	1.1337	1.1348	1.1371	1.1404	1.1448	1.1502	1.1565	1.1637	1.1716	1.1801	1.189	1.198	1.2072	1.2162	1.225	1.2335	1.2416	1.2491	1.2561	1.2623	1.2678
0.47759	0.5175	0.64757	0.76842	0.84738	0.90024	0.94039	0.97124	0.99314	1.0086	1.022	1.0346	1.0466	1.0584	1.0695	1.0799	1.0907	1.1025	1.1145	1.1254	1.1339	1.1392	1.1417	1.1422	1.1412	1.1395	1.1375	1.1358	1.1347	1.1347	1.1358	1.1379	1.1412	1.1455	1.1507	1.157	1.164	1.1719	1.1803	1.1891	1.1981	1.2072	1.2162	1.225	1.2334	1.2415	1.2491	1.256	1.2623	1.2678
0.47805	0.51833	0.64991	0.77169	0.85026	0.90193	0.94096	0.97131	0.99329	1.0093	1.0231	1.036	1.0481	1.0596	1.0703	1.0803	1.0907	1.1023	1.1143	1.1252	1.1338	1.1392	1.1419	1.1425	1.1417	1.1402	1.1383	1.1366	1.1356	1.1356	1.1367	1.1388	1.142	1.1462	1.1513	1.1574	1.1644	1.1722	1.1805	1.1892	1.1981	1.2072	1.2161	1.2249	1.2334	1.2414	1.249	1.256	1.2622	1.2677
0.47851	0.51916	0.65226	0.77497	0.85314	0.90362	0.94154	0.97138	0.99344	1.0099	1.0242	1.0374	1.0496	1.0609	1.0711	1.0807	1.0908	1.1022	1.114	1.125	1.1337	1.1392	1.142	1.1428	1.1423	1.1408	1.1391	1.1376	1.1366	1.1366	1.1377	1.1397	1.1428	1.1469	1.1519	1.1579	1.1648	1.1724	1.1807	1.1893	1.1982	1.2072	1.2161	1.2249	1.2333	1.2414	1.2489	1.2559	1.2622	1.2677
0.47897	0.51999	0.6546	0.77825	0.85603	0.90531	0.94211	0.97145	0.9936	1.0105	1.0253	1.0389	1.0511	1.0621	1.072	1.0811	1.0908	1.102	1.1138	1.1248	1.1336	1.1392	1.1422	1.1432	1.1428	1.1415	1.1399	1.1385	1.1375	1.1376	1.1386	1.1406	1.1436	1.1476	1.1525	1.1584	1.1652	1.1727	1.1808	1.1894	1.1983	1.2072	1.2161	1.2248	1.2333	1.2413	1.2489	1.2558	1.2621	1.2677
0.47943	0.52081	0.65695	0.78153	0.85892	0.907	0.94269	0.97152	0.99375	1.0111	1.0265	1.0403	1.0526	1.0634	1.0728	1.0815	1.0909	1.1019	1.1136	1.1246	1.1334	1.1392	1.1424	1.1435	1.1433	1.1422	1.1407	1.1394	1.1385	1.1386	1.1396	1.1415	1.1444	1.1483	1.1531	1.1589	1.1655	1.173	1.181	1.1895	1.1983	1.2072	1.2161	1.2248	1.2332	1.2412	1.2488	1.2558	1.2621	1.2676
0.47989	0.52164	0.6593	0.78481	0.86181	0.90869	0.94326	0.97159	0.9939	1.0117	1.0276	1.0417	1.0541	1.0646	1.0736	1.0819	1.091	1.1018	1.1134	1.1244	1.1333	1.1393	1.1426	1.1439	1.1438	1.1429	1.1415	1.1403	1.1395	1.1395	1.1405	1.1424	1.1452	1.149	1.1537	1.1594	1.1659	1.1732	1.1812	1.1897	1.1984	1.2072	1.216	1.2247	1.2331	1.2412	1.2487	1.2557	1.262	1.2676
0.48035	0.52247	0.66165	0.7881	0.8647	0.91038	0.94384	0.97166	0.99406	1.0123	1.0287	1.0432	1.0556	1.0659	1.0745	1.0824	1.091	1.1016	1.1132	1.1242	1.1332	1.1393	1.1427	1.1442	1.1443	1.1436	1.1424	1.1412	1.1404	1.1405	1.1415	1.1433	1.1461	1.1497	1.1543	1.1599	1.1663	1.1735	1.1814	1.1898	1.1984	1.2072	1.216	1.2247	1.2331	1.2411	1.2487	1.2557	1.262	1.2676
0.48081	0.52331	0.66401	0.79139	0.8676	0.91208	0.94441	0.97173	0.99421	1.013	1.0298	1.0446	1.0571	1.0672	1.0753	1.0828	1.0911	1.1015	1.113	1.124	1.1331	1.1393	1.1429	1.1446	1.1449	1.1442	1.1432	1.1421	1.1414	1.1415	1.1424	1.1442	1.1469	1.1504	1.1549	1.1603	1.1666	1.1738	1.1816	1.1899	1.1985	1.2072	1.216	1.2246	1.233	1.241	1.2486	1.2556	1.2619	1.2676
0.48127	0.52414	0.66637	0.79469	0.87049	0.91377	0.94499	0.9718	0.99437	1.0136	1.0309	1.0461	1.0586	1.0684	1.0762	1.0832	1.0912	1.1013	1.1127	1.1238	1.133	1.1393	1.1431	1.1449	1.1454	1.1449	1.144	1.143	1.1424	1.1425	1.1434	1.1451	1.1477	1.1512	1.1555	1.1608	1.167	1.1741	1.1818	1.19	1.1985	1.2073	1.216	1.2246	1.233	1.241	1.2485	1.2555	1.2619	1.2675
0.48174	0.52497	0.66872	0.79798	0.87339	0.91547	0.94556	0.97186	0.99452	1.0142	1.032	1.0475	1.0602	1.0697	1.077	1.0836	1.0912	1.1012	1.1125	1.1236	1.1328	1.1393	1.1432	1.1453	1.1459	1.1456	1.1448	1.1439	1.1433	1.1435	1.1443	1.146	1.1485	1.1519	1.1561	1.1613	1.1674	1.1743	1.182	1.1901	1.1986	1.2073	1.216	1.2245	1.2329	1.2409	1.2485	1.2555	1.2618	1.2675
0.4822	0.5258	0.67108	0.80128	0.87629	0.91716	0.94613	0.97193	0.99468	1.0148	1.0331	1.049	1.0617	1.071	1.0779	1.084	1.0913	1.1011	1.1123	1.1234	1.1327	1.1393	1.1434	1.1456	1.1464	1.1463	1.1456	1.1448	1.1443	1.1444	1.1453	1.1469	1.1493	1.1526	1.1567	1.1618	1.1678	1.1746	1.1822	1.1902	1.1987	1.2073	1.2159	1.2245	1.2328	1.2409	1.2484	1.2554	1.2618	1.2675
0.48266	0.52663	0.67345	0.80458	0.8792	0.91886	0.94671	0.972	0.99484	1.0155	1.0342	1.0504	1.0632	1.0722	1.0787	1.0844	1.0914	1.1009	1.1121	1.1231	1.1326	1.1393	1.1436	1.146	1.1469	1.147	1.1464	1.1457	1.1453	1.1454	1.1463	1.1478	1.1501	1.1533	1.1573	1.1623	1.1681	1.1749	1.1823	1.1903	1.1987	1.2073	1.2159	1.2245	1.2328	1.2408	1.2483	1.2554	1.2618	1.2674
0.48312	0.52746	0.67581	0.80788	0.8821	0.92056	0.94728	0.97207	0.99499	1.0161	1.0354	1.0519	1.0647	1.0735	1.0796	1.0848	1.0914	1.1008	1.1119	1.1229	1.1325	1.1393	1.1438	1.1463	1.1475	1.1476	1.1472	1.1466	1.1463	1.1464	1.1472	1.1487	1.151	1.154	1.158	1.1628	1.1685	1.1752	1.1825	1.1905	1.1988	1.2073	1.2159	1.2244	1.2327	1.2407	1.2483	1.2553	1.2617	1.2674
0.48359	0.5283	0.67817	0.81118	0.88501	0.92225	0.94786	0.97214	0.99515	1.0167	1.0365	1.0534	1.0663	1.0748	1.0804	1.0852	1.0915	1.1007	1.1117	1.1227	1.1323	1.1393	1.1439	1.1467	1.148	1.1483	1.148	1.1476	1.1472	1.1474	1.1482	1.1496	1.1518	1.1547	1.1586	1.1633	1.1689	1.1754	1.1827	1.1906	1.1988	1.2073	1.2159	1.2244	1.2327	1.2407	1.2482	1.2552	1.2617	1.2674
0.48405	0.52913	0.68053	0.81448	0.88791	0.92395	0.94843	0.97221	0.99531	1.0174	1.0376	1.0548	1.0678	1.0761	1.0813	1.0857	1.0916	1.1005	1.1114	1.1225	1.1322	1.1393	1.1441	1.147	1.1485	1.149	1.1489	1.1485	1.1482	1.1484	1.1491	1.1505	1.1526	1.1555	1.1592	1.1638	1.1693	1.1757	1.1829	1.1907	1.1989	1.2073	1.2159	1.2243	1.2326	1.2406	1.2482	1.2552	1.2616	1.2673
0.48451	0.52996	0.6829	0.81779	0.89082	0.92565	0.94901	0.97228	0.99547	1.018	1.0387	1.0563	1.0693	1.0773	1.0821	1.0861	1.0916	1.1004	1.1112	1.1223	1.1321	1.1393	1.1443	1.1474	1.149	1.1497	1.1497	1.1494	1.1492	1.1494	1.1501	1.1514	1.1534	1.1562	1.1598	1.1642	1.1696	1.176	1.1831	1.1908	1.199	1.2073	1.2158	1.2243	1.2325	1.2405	1.2481	1.2551	1.2616	1.2673
0.48498	0.5308	0.68526	0.82109	0.89372	0.92735	0.94958	0.97235	0.99562	1.0186	1.0399	1.0577	1.0709	1.0786	1.083	1.0865	1.0917	1.1003	1.111	1.1221	1.132	1.1393	1.1444	1.1477	1.1496	1.1504	1.1505	1.1503	1.1502	1.1504	1.1511	1.1523	1.1543	1.1569	1.1604	1.1647	1.17	1.1763	1.1833	1.1909	1.199	1.2074	1.2158	1.2242	1.2325	1.2405	1.248	1.2551	1.2615	1.2673
0.48544	0.53163	0.68763	0.8244	0.89663	0.92905	0.95015	0.97242	0.99578	1.0193	1.041	1.0592	1.0724	1.0799	1.0838	1.0869	1.0918	1.1001	1.1108	1.1219	1.1318	1.1394	1.1446	1.1481	1.1501	1.1511	1.1513	1.1512	1.1511	1.1514	1.152	1.1532	1.1551	1.1576	1.161	1.1652	1.1704	1.1765	1.1835	1.191	1.1991	1.2074	1.2158	1.2242	1.2324	1.2404	1.248	1.255	1.2615	1.2672
[truncated: 51 more columns]
