# Supplementary material for: Quantitative control of noise in mammalian gene expression by dynamic histone regulation
Source: eLife. 2021 Aug 11;10:e65654. doi: 10.7554/eLife.65654 (PMC8357418; doi:10.7554/eLife.65654)
Supplement: Figure 1—figure supplement 4—source data 1. [file elife-65654-fig1-figsupp4-data1.xlsx]

## Sheet: Fig1S3-A
AM					PWM 200min				PWM 400min
mean light power (uW/cm2)	log10(G)	log10(G)	log10(G)		mean light power (uW/cm2)	log10(G)	log10(G)		mean light power (uW/cm2)	log10(G)	log10(G)	log10(G)
0	4.0107	3.9111	4.0019		0.1	4.0324	4.0019		0	3.9111	4.0019	4.0324
1	4.0923	4.1195			1	4.3364	4.0946		2	4.2094	4.4775
2	4.2843	4.1961	4.4631		4	4.6377	4.4826		4	4.4399	4.3799	4.6689
4	4.5004	4.4102			6	4.725	4.5659		6	4.5513	4.5974
6	4.6469	4.7332			10	5.1388	4.7643		10	4.9199	4.8158
7	4.7175	4.5743			15	5.1719	5.035		12	4.9825	5.1515
10	4.9169	4.7971			20	5.2831	5.235		15	5.0073	5.0736
15	5.2442	5.3054	5.214		40	5.6278	5.3832		20	5.1319	5.1222
20	5.4112	5.5025	5.4888		70	5.9345	5.8905		40	5.4588	5.3609	5.6024
37.5	5.5818	5.8292	5.7426		100	5.9857	6.053		70	5.8017	5.9371	5.8551
57.5	5.7413	5.8638							100	6.0296	6.053	5.9857
70	5.8762	5.9913
82.5	5.9289	5.9988
100	5.9073	6.0296	6.053

## Sheet: Fig1S3-B
AM					PWM 200min				PWM 400min
mean light power (uW/cm2)	CV_G	CV_G	CV_G		mean light power (uW/cm2)	CV_G	CV_G		mean light power (uW/cm2)	CV_G	CV_G	CV_G
0	0.88142	0.85608	0.83647		0.1	0.8981	0.83647		0	0.85608	0.83647	0.9634
1	1.0729	1.0921			1	1.2678	1.0132		2	1.0768	1.1366
2	1.3348	1.4724	1.6448		4	1.1238	1.2868		4	0.9983	1.0333	0.95102
4	1.5449	1.6866			6	1.0287	1.2321		6	0.96053	0.95283
6	1.5479	1.6221			10	0.79293	1.0781		10	0.74496	0.83557
7	1.5447	1.5747			15	0.77607	0.91808		12	0.71298	0.57721
10	1.386	1.503			20	0.72575	0.80972		15	0.72776	0.71105
15	1.1781	1.1826	1.2221		40	0.64169	0.81377		20	0.68474	0.76863
20	1.1659	1.0297	1.0393		70	0.59096	0.69879		40	0.6804	0.73265	0.55445
37.5	0.96897	0.76341	0.82039		100	0.58355	0.59278		70	0.64214	0.63913	0.47148
57.5	0.83124	0.74042							100	0.57396	0.59278	0.49977
70	0.71881	0.61827
82.5	0.70027	0.62018
100	0.70475	0.57396	0.59278

## Sheet: Fig1S3-C
AM							PWM 200min					PWM 400min
log10(G)	log10(G)	log10(G)	CV_G	CV_G	CV_G		log10(G)	log10(G)	CV_G	CV_G		log10(G)	log10(G)	log10(G)	CV_G	CV_G	CV_G
4.0107	3.9111	4.0019	0.88142	0.85608	0.83647		4.0324	4.0019	0.8981	0.83647		3.9111	4.0019	4.0324	0.85608	0.83647	0.9634
4.0923	4.1195		1.0729	1.0921			4.3364	4.0946	1.2678	1.0132		4.2094	4.4775		1.0768	1.1366
4.2843	4.1961	4.4631	1.3348	1.4724	1.6448		4.6377	4.4826	1.1238	1.2868		4.4399	4.3799	4.6689	0.9983	1.0333	0.95102
4.5004	4.4102		1.5449	1.6866			4.725	4.5659	1.0287	1.2321		4.5513	4.5974		0.96053	0.95283
4.6469	4.7332		1.5479	1.6221			5.1388	4.7643	0.79293	1.0781		4.9199	4.8158		0.74496	0.83557
4.7175	4.5743		1.5447	1.5747			5.1719	5.035	0.77607	0.91808		4.9825	5.1515		0.71298	0.57721
4.9169	4.7971		1.386	1.503			5.2831	5.235	0.72575	0.80972		5.0073	5.0736		0.72776	0.71105
5.2442	5.3054	5.214	1.1781	1.1826	1.2221		5.6278	5.3832	0.64169	0.81377		5.1319	5.1222		0.68474	0.76863
5.4112	5.5025	5.4888	1.1659	1.0297	1.0393		5.9345	5.8905	0.59096	0.69879		5.4588	5.3609	5.6024	0.6804	0.73265	0.55445
5.5818	5.8292	5.7426	0.96897	0.76341	0.82039		5.9857	6.053	0.58355	0.59278		5.8017	5.9371	5.8551	0.64214	0.63913	0.47148
5.7413	5.8638		0.83124	0.74042								6.0296	6.053	5.9857	0.57396	0.59278	0.49977
5.8762	5.9913		0.71881	0.61827
5.9289	5.9988		0.70027	0.62018
5.9073	6.0296	6.053	0.70475	0.57396	0.59278

## Sheet: Fig1S3-D
AM					PWM 50min				PWM 100min				PWM 200min				PWM 400min
mean light power (uW/cm2)	log10(G)	log10(G)	log10(G)		mean light power (uW/cm2)	log10(G)	log10(G)		mean light power (uW/cm2)	log10(G)	log10(G)		mean light power (uW/cm2)	log10(G)	log10(G)		mean light power (uW/cm2)	log10(G)	log10(G)
0	3.1925	3.1597	3.3355		0	3.1962	3.1962		0	3.1962	3.1925		0	3.1962	3.1925		0	3.1925	3.1597
1	3.6255		4.2402		1	3.7975	3.5767		1	3.565	3.4166		1	3.6126	3.4166		1	3.4428	3.4646
2	3.7209		4.3287		2	3.8717	3.9558		2	3.7385	3.6311		2	3.8198	3.6311		2	3.7885	3.8841
4	4.244	3.896			4	4.0218	4.043		4	4.0633	4.1045		4	4.1645	4.1045		4	3.8748	4.0963
6	4.4379	4.2134	5.3103		6	4.4225	4.4954		6	4.3172	4.4044		6	4.3546	4.4044		6	4.0528	4.3112
8	5.1162	4.8382	5.4619		8	4.8695	4.7178		8	4.641	4.7483		8	4.5434	4.7483		8	4.2129	4.5173
10	5.161	4.8964	5.6204		10	4.9989	5.1234		10	4.9438	5.0715		10	4.7244	5.0715		10	4.4096	4.6886
12	5.3042		5.8767		12	5.2049	5.2785		12	5.2217	5.1231		12	4.9005	5.1231		12	4.4401	4.743
15	5.3523	5.2808	5.8938		15	5.3348	5.2507		15	5.2177	5.0921		15	4.9517	5.0921		15	4.5226	4.8197
20	5.4833	5.4377	5.8347		20	5.4564	5.4379		20	5.3528	5.1397		20	5.0869	5.1397		20	4.6848	4.9418
40	5.8471	5.8349	5.9613		40	5.8263	5.8031		40	5.716	5.6107		40	5.5234	5.6107		40	5.1038	5.3705
70	5.8123	5.9523	6.04		70	6.0156	5.9791		70	5.9745	5.8486		70	5.886	5.8486		70	5.8794	5.7278
100	5.708	5.9258	6.0481		100	6.0466	6.0446		100	6.0466	5.708		100	6.0604	5.708		100	5.9371	5.9258

## Sheet: Fig1S3-E
AM					PWM 50min				PWM 100min				PWM 200min				PWM 400min
mean light power (uW/cm2)	CV	CV	CV		mean light power (uW/cm2)	CV	CV		mean light power (uW/cm2)	CV	CV		mean light power (uW/cm2)	CV	CV		mean light power (uW/cm2)	CV	CV
0	0.7458	0.67938	1.6399		0	0.72202	0.72202		0	0.72202	0.7458		0	0.72202	0.7458		0	0.7458	0.67938
1	3.3451		4.364		1	4.9744	3.2664		1	3.5595	2.4902		1	2.8265	2.4902		1	1.3686	1.357
2	4.0934		4.251		2	5.0675	4.864		2	4.434	3.0558		2	2.8742	3.0558		2	2.1654	1.5759
4	3.689	3.9268			4	4.8523	4.8891		4	4.3893	3.7868		4	2.3697	3.7868		4	1.4611	1.2243
6	3.3443	3.4663	1.76		6	3.9727	3.8331		6	4.2378	2.9013		6	1.8243	2.9013		6	1.4086	1.1754
8	1.8889	2.2332	1.4533		8	2.6754	3.0843		8	2.7407	2.2439		8	1.5822	2.2439		8	1.306	1.0515
10	1.8478	2.1011	1.2845		10	2.2494	2.3218		10	1.9643	1.6084		10	1.2828	1.6084		10	1.3035	0.98047
12	1.559		0.89584		12	1.8977	1.8161		12	1.503	1.5657		12	1.2037	1.5657		12	1.2373	0.9654
15	1.4333	1.4519	0.89366		15	1.6393	1.8501		15	1.5658	1.6886		15	1.1847	1.6886		15	1.1897	0.97863
20	1.2369	1.25	0.94567		20	1.449	1.5367		20	1.3314	1.6268		20	1.158	1.6268		20	1.2376	0.95311
40	0.85612	0.77258	0.78766		40	0.92645	0.98318		40	0.98103	1.0066		40	0.90434	1.0066		40	1.0682	0.828
70	0.86457	0.65576	0.7182		70	0.73001	0.75671		70	0.75707	0.79109		70	0.74201	0.79109		70	0.75875	0.72086
100	1.0146	0.69073	0.69732		100	0.69246	0.69281		100	0.69246	1.0146		100	0.6779	1.0146		100	0.7753	0.69073

## Sheet: Fig1S3-F
AM							PWM 50min					PWM 100min					PWM 200min					PWM 400min
log10(G)	log10(G)	log10(G)	CV	CV	CV		log10(G)	log10(G)	CV	CV		log10(G)	log10(G)	CV	CV		log10(G)	log10(G)	CV	CV		log10(G)	log10(G)	CV	CV
3.1925	3.1597	3.3355	0.7458	0.67938	1.6399		3.1962	3.1962	0.72202	0.72202		3.1962	3.1925	0.72202	0.7458		3.1962	3.1925	0.72202	0.7458		3.1925	3.1597	0.7458	0.67938
3.6255		4.2402	3.3451		4.364		3.7975	3.5767	4.9744	3.2664		3.565	3.4166	3.5595	2.4902		3.6126	3.4166	2.8265	2.4902		3.4428	3.4646	1.3686	1.357
3.7209		4.3287	4.0934		4.251		3.8717	3.9558	5.0675	4.864		3.7385	3.6311	4.434	3.0558		3.8198	3.6311	2.8742	3.0558		3.7885	3.8841	2.1654	1.5759
4.244	3.896		3.689	3.9268			4.0218	4.043	4.8523	4.8891		4.0633	4.1045	4.3893	3.7868		4.1645	4.1045	2.3697	3.7868		3.8748	4.0963	1.4611	1.2243
4.4379	4.2134	5.3103	3.3443	3.4663	1.76		4.4225	4.4954	3.9727	3.8331		4.3172	4.4044	4.2378	2.9013		4.3546	4.4044	1.8243	2.9013		4.0528	4.3112	1.4086	1.1754
5.1162	4.8382	5.4619	1.8889	2.2332	1.4533		4.8695	4.7178	2.6754	3.0843		4.641	4.7483	2.7407	2.2439		4.5434	4.7483	1.5822	2.2439		4.2129	4.5173	1.306	1.0515
5.161	4.8964	5.6204	1.8478	2.1011	1.2845		4.9989	5.1234	2.2494	2.3218		4.9438	5.0715	1.9643	1.6084		4.7244	5.0715	1.2828	1.6084		4.4096	4.6886	1.3035	0.98047
5.3042		5.8767	1.559		0.89584		5.2049	5.2785	1.8977	1.8161		5.2217	5.1231	1.503	1.5657		4.9005	5.1231	1.2037	1.5657		4.4401	4.743	1.2373	0.9654
5.3523	5.2808	5.8938	1.4333	1.4519	0.89366		5.3348	5.2507	1.6393	1.8501		5.2177	5.0921	1.5658	1.6886		4.9517	5.0921	1.1847	1.6886		4.5226	4.8197	1.1897	0.97863
5.4833	5.4377	5.8347	1.2369	1.25	0.94567		5.4564	5.4379	1.449	1.5367		5.3528	5.1397	1.3314	1.6268		5.0869	5.1397	1.158	1.6268		4.6848	4.9418	1.2376	0.95311
5.8471	5.8349	5.9613	0.85612	0.77258	0.78766		5.8263	5.8031	0.92645	0.98318		5.716	5.6107	0.98103	1.0066		5.5234	5.6107	0.90434	1.0066		5.1038	5.3705	1.0682	0.828
5.8123	5.9523	6.04	0.86457	0.65576	0.7182		6.0156	5.9791	0.73001	0.75671		5.9745	5.8486	0.75707	0.79109		5.886	5.8486	0.74201	0.79109		5.8794	5.7278	0.75875	0.72086
5.708	5.9258	6.0481	1.0146	0.69073	0.69732		6.0466	6.0446	0.69246	0.69281		6.0466	5.708	0.69246	1.0146		6.0604	5.708	0.6779	1.0146		5.9371	5.9258	0.7753	0.69073

## Sheet: Fig1S3-G
	AM, mean light intensities
log10(G)	0 uW	2 uW	6 uW	8 uW	20 uW	40 uW	100 uW
1	0	0.1	0.2	0.3	0.4	0.5	0.6
1.1	0	0.1	0.2	0.3	0.4	0.5	0.6
1.2	0	0.1	0.2	0.3	0.4	0.5	0.6
1.3	0	0.1	0.2	0.3	0.4	0.5	0.6
1.4	0	0.1	0.2	0.3	0.4	0.5	0.6
1.5	0	0.1	0.2	0.3	0.4	0.5	0.6
1.6	0	0.1	0.2	0.3	0.4	0.5	0.6
1.7	0	0.1	0.2	0.3	0.4	0.5	0.6
1.8	0	0.1	0.2	0.3	0.4	0.5	0.6
1.9	0	0.1	0.2	0.3	0.4	0.5	0.6
2	0	0.1	0.2	0.3	0.4	0.5	0.6
2.1	0	0.10002	0.2	0.3	0.4	0.5	0.6
2.2	5.778e-05	0.10005	0.2	0.3	0.4	0.5	0.6
2.3	0.00014445	0.10005	0.20002	0.30001	0.4	0.5	0.6
2.4	0.00040446	0.10009	0.20008	0.30007	0.4	0.50003	0.60003
2.5	0.00054891	0.10017	0.2001	0.30006	0.4	0.5	0.6
2.6	0.0021956	0.10056	0.20013	0.30007	0.40006	0.50005	0.6
2.7	0.0096493	0.10224	0.2003	0.30034	0.40003	0.50008	0.6
2.8	0.039435	0.1106	0.20156	0.30066	0.40012	0.50005	0.60005
2.9	0.12304	0.14401	0.20746	0.30274	0.40026	0.50016	0.60003
3	0.20928	0.22402	0.22695	0.30825	0.40035	0.50036	0.6
3.1	0.22679	0.286	0.25605	0.31576	0.40058	0.5003	0.60021
3.2	0.17351	0.29905	0.27849	0.32266	0.40112	0.5009	0.60016
3.3	0.10429	0.25425	0.28759	0.33012	0.40184	0.50088	0.60059
3.4	0.054544	0.18534	0.27559	0.33149	0.4019	0.50118	0.60067
3.5	0.025828	0.14972	0.26176	0.333	0.40251	0.50192	0.60093
3.6	0.014272	0.13073	0.2542	0.33445	0.40288	0.50203	0.60124
3.7	0.0059802	0.12201	0.24894	0.33372	0.40383	0.50227	0.60078
3.8	0.0025423	0.11611	0.24614	0.33572	0.40329	0.50219	0.6007
3.9	0.0019934	0.11361	0.24278	0.33812	0.40363	0.50238	0.60137
4	0.00098226	0.11025	0.2422	0.3379	0.40438	0.50304	0.6009
4.1	0.00075114	0.10902	0.23965	0.34067	0.40562	0.50367	0.60109
4.2	0.00069336	0.1078	0.2371	0.34211	0.40605	0.5043	0.60067
4.3	0.00060669	0.10642	0.23527	0.34348	0.40813	0.50551	0.60098
4.4	0.00023112	0.10528	0.23489	0.34466	0.40908	0.50592	0.60109
4.5	0.00031779	0.10415	0.2298	0.34311	0.41101	0.50671	0.60116
4.6	0.00014445	0.10285	0.22864	0.34437	0.41381	0.50871	0.60155
4.7	0.00023112	0.10283	0.22579	0.34441	0.41807	0.5114	0.60178
4.8	0.00011556	0.10234	0.22381	0.34387	0.42098	0.51452	0.60245
4.9	0.00020223	0.102	0.22101	0.34375	0.42859	0.51877	0.60264
5	0.00011556	0.10163	0.21796	0.33986	0.43044	0.52239	0.60344
5.1	5.778e-05	0.10142	0.21554	0.33701	0.43854	0.52787	0.60499
5.2	0.00011556	0.10077	0.21248	0.33651	0.44707	0.53587	0.60804
5.3	0.00017334	0.10084	0.21058	0.33345	0.45578	0.54636	0.61204
5.4	0.00017334	0.10056	0.20937	0.3305	0.46468	0.55699	0.62005
5.5	0.00011556	0.10067	0.2076	0.32495	0.47198	0.56598	0.63175
5.6	5.778e-05	0.10071	0.20559	0.32078	0.47956	0.57806	0.65072
5.7	8.667e-05	0.10043	0.2039	0.31774	0.48809	0.59239	0.67663
5.8	5.778e-05	0.10037	0.20314	0.31326	0.4906	0.5987	0.71061
5.9	8.667e-05	0.10033	0.20257	0.31042	0.48428	0.59941	0.7435
6	5.778e-05	0.10022	0.20167	0.30774	0.47235	0.5899	0.75588
6.1	8.667e-05	0.10023	0.20121	0.30497	0.45246	0.57297	0.73983
6.2	0	0.10008	0.20086	0.30342	0.43396	0.55357	0.70459
6.3	0	0.10012	0.20056	0.30196	0.42263	0.53428	0.66552
6.4	2.889e-05	0.10006	0.2004	0.30113	0.41323	0.51866	0.63416
6.5	0	0.1	0.20024	0.30072	0.40623	0.50926	0.61721
6.6	0	0.1	0.2	0.3	0.4	0.5	0.6
6.7	0	0.1	0.2	0.3	0.4	0.5	0.6
6.8	0	0.1	0.2	0.3	0.4	0.5	0.6
6.9	0	0.1	0.2	0.3	0.4	0.5	0.6
7	0	0.1	0.2	0.3	0.4	0.5	0.6
7.1	0	0.1	0.2	0.3	0.4	0.5	0.6
7.2	0	0.1	0.2	0.3	0.4	0.5	0.6
7.3	0	0.1	0.2	0.3	0.4	0.5	0.6
7.4	0	0.1	0.2	0.3	0.4	0.5	0.6
7.5	0	0.1	0.2	0.3	0.4	0.5	0.6
7.6	0	0.1	0.2	0.3	0.4	0.5	0.6
7.7	0	0.1	0.2	0.3	0.4	0.5	0.6
7.8	0	0.1	0.2	0.3	0.4	0.5	0.6
7.9	0	0.1	0.2	0.3	0.4	0.5	0.6
8	0	0.1	0.2	0.3	0.4	0.5	0.6

## Sheet: Fig1S3-H
	PWM 100min, mean light intensities
log10(G)	0 uW	2 uW	6 uW	8 uW	20 uW	40 uW	100 uW
1	0	0.1	0.2	0.30002	0.4	0.5	0.6
1.1	0	0.1	0.2	0.3	0.4	0.5	0.6
1.2	0	0.1	0.2	0.3	0.4	0.5	0.6
1.3	0	0.1	0.2	0.3	0.4	0.5	0.6
1.4	0	0.1	0.2	0.3	0.4	0.5	0.6
1.5	1.6409e-05	0.10003	0.2	0.3	0.4	0.5	0.6
1.6	0	0.1	0.2	0.3	0.4	0.5	0.6
1.7	1.6409e-05	0.1	0.2	0.3	0.4	0.5	0.6
1.8	0	0.10002	0.2	0.30002	0.4	0.5	0.6
1.9	0	0.1	0.2	0.3	0.4	0.5	0.60002
2	1.6409e-05	0.10002	0.2	0.3	0.40002	0.5	0.6
2.1	4.9228e-05	0.10005	0.2	0.3	0.4	0.5	0.6
2.2	8.2047e-05	0.10003	0.2	0.3	0.4	0.5	0.6
2.3	0.00014768	0.10009	0.2	0.30003	0.40002	0.50002	0.60002
2.4	0.00026255	0.10016	0.20009	0.30002	0.40005	0.50003	0.6
2.5	0.00041023	0.10028	0.20009	0.30003	0.40007	0.50002	0.60006
2.6	0.0014932	0.10097	0.20033	0.30017	0.40002	0.50005	0.6
2.7	0.0059566	0.10514	0.2009	0.30031	0.40017	0.50003	0.60004
2.8	0.032277	0.12771	0.20403	0.30186	0.40055	0.50005	0.60007
2.9	0.12194	0.20146	0.21375	0.30611	0.40164	0.50014	0.60002
3	0.23851	0.29328	0.23437	0.31416	0.40393	0.50036	0.60002
3.1	0.25597	0.31853	0.25171	0.32254	0.40601	0.50038	0.60034
3.2	0.1745	0.27079	0.26219	0.33041	0.40979	0.50092	0.60043
3.3	0.082079	0.20401	0.27077	0.33598	0.41335	0.50177	0.60067
3.4	0.035067	0.15732	0.27031	0.34002	0.41575	0.50258	0.6009
3.5	0.021299	0.13567	0.26775	0.34179	0.41894	0.50301	0.60101
3.6	0.011569	0.12386	0.26701	0.34261	0.41941	0.50318	0.60132
3.7	0.0072529	0.115	0.26195	0.34516	0.4212	0.50331	0.60132
3.8	0.0041187	0.11115	0.25709	0.34599	0.42352	0.50382	0.6016
3.9	0.0025927	0.10723	0.2563	0.34981	0.42648	0.50366	0.60157
4	0.0011651	0.10501	0.25329	0.35109	0.42928	0.50425	0.60155
4.1	0.00068919	0.10424	0.24865	0.35076	0.43428	0.50559	0.60187
4.2	0.00063996	0.10335	0.24457	0.35154	0.43687	0.50714	0.60194
4.3	0.00049228	0.10232	0.24039	0.35292	0.43894	0.50822	0.60241
4.4	0.000361	0.10219	0.23409	0.35279	0.44285	0.50982	0.60293
4.5	0.00029537	0.10168	0.23091	0.34955	0.44634	0.51229	0.60388
4.6	9.8456e-05	0.10153	0.22623	0.34769	0.44899	0.51619	0.6063
4.7	0.00014768	0.10113	0.22224	0.34457	0.45379	0.51982	0.60757
4.8	9.8456e-05	0.10102	0.2188	0.34059	0.45611	0.52647	0.61259
4.9	9.8456e-05	0.10061	0.21384	0.33652	0.45638	0.53373	0.6166
5	6.5637e-05	0.10066	0.21071	0.33138	0.46047	0.54298	0.62335
5.1	4.9228e-05	0.10059	0.20848	0.32659	0.45734	0.55129	0.63697
5.2	4.9228e-05	0.10044	0.20751	0.32221	0.45347	0.56148	0.6531
5.3	1.6409e-05	0.10028	0.20513	0.31736	0.44998	0.57553	0.67724
5.4	4.9228e-05	0.10049	0.20394	0.31381	0.44383	0.58698	0.69509
5.5	1.6409e-05	0.10039	0.20301	0.30956	0.43762	0.59492	0.7175
5.6	1.6409e-05	0.10022	0.20251	0.30708	0.43127	0.59736	0.72459
5.7	0	0.10019	0.20204	0.30536	0.42151	0.59253	0.71691
5.8	1.6409e-05	0.10017	0.20121	0.30378	0.41455	0.57792	0.69895
5.9	1.6409e-05	0.10013	0.20105	0.30227	0.40934	0.55902	0.67082
6	0	0.10016	0.20097	0.30189	0.40621	0.54038	0.6468
6.1	0	0.10006	0.2006	0.30104	0.40339	0.52444	0.62723
6.2	0	0.10013	0.20051	0.30094	0.40252	0.51315	0.61763
6.3	0	0.10005	0.20028	0.30061	0.40134	0.50708	0.61007
6.4	0	0.10006	0.20014	0.30038	0.40102	0.5039	0.60643
6.5	0	0.10003	0.20009	0.3003	0.40057	0.50206	0.6041
6.6	0	0.10002	0.20011	0.30023	0.40045	0.501	0.60284
6.7	0	0.10002	0.20002	0.30009	0.4002	0.50065	0.6017
6.8	0	0.10003	0.20004	0.30003	0.4001	0.50024	0.60099
6.9	0	0.10002	0.2	0.30002	0.4001	0.50021	0.60056
7	0	0.1	0.2	0.3	0.40002	0.50005	0.60011
7.1	0	0.1	0.2	0.3	0.4	0.5	0.6
7.2	0	0.1	0.2	0.3	0.4	0.5	0.6
7.3	0	0.1	0.2	0.3	0.4	0.5	0.6
7.4	0	0.1	0.2	0.3	0.4	0.5	0.6
7.5	0	0.1	0.2	0.3	0.4	0.5	0.6
7.6	0	0.1	0.2	0.3	0.4	0.5	0.6
7.7	0	0.1	0.2	0.3	0.4	0.5	0.6
7.8	0	0.1	0.2	0.3	0.4	0.5	0.6
7.9	0	0.1	0.2	0.3	0.4	0.5	0.6
8	0	0.1	0.2	0.3	0.4	0.5	0.6

## Sheet: Fig1S3-I
	PWM 200min, mean light intensities
log10(G)	0 uW	2 uW	6 uW	8 uW	20 uW	40 uW	100 uW
1	0	0.1	0.2	0.3	0.4	0.5	0.6
1.1	0	0.1	0.2	0.3	0.4	0.5	0.6
1.2	0	0.1	0.2	0.3	0.4	0.5	0.6
1.3	0	0.1	0.2	0.3	0.4	0.5	0.6
1.4	0	0.1	0.2	0.3	0.4	0.5	0.6
1.5	0	0.1	0.2	0.3	0.4	0.5	0.6
1.6	2.217e-05	0.10002	0.2	0.3	0.4	0.5	0.6
1.7	0	0.10002	0.2	0.3	0.4	0.5	0.6
1.8	2.217e-05	0.10002	0.2	0.3	0.4	0.5	0.6
1.9	2.217e-05	0.10002	0.20002	0.3	0.4	0.5	0.6
2	4.4339e-05	0.10002	0.2	0.3	0.4	0.5	0.6
2.1	4.4339e-05	0.10007	0.20002	0.3	0.4	0.5	0.6
2.2	0.0002217	0.10004	0.20005	0.3	0.40002	0.5	0.6
2.3	0.00019953	0.10029	0.20007	0.30006	0.4	0.5	0.60002
2.4	0.0005099	0.10034	0.20022	0.30006	0.4	0.50003	0.6
2.5	0.0017957	0.10079	0.2002	0.30011	0.4	0.5	0.60002
2.6	0.0052985	0.10312	0.20092	0.30026	0.4	0.50003	0.6
2.7	0.022436	0.11437	0.20373	0.30075	0.40002	0.50003	0.6
2.8	0.08032	0.15343	0.21416	0.30291	0.40019	0.50018	0.6
2.9	0.17807	0.22778	0.23777	0.30861	0.40032	0.50018	0.60002
3	0.24597	0.29583	0.27191	0.31898	0.40067	0.50023	0.60013
3.1	0.21724	0.29262	0.29339	0.3283	0.40109	0.50053	0.60002
3.2	0.12548	0.24453	0.30107	0.33787	0.40204	0.50046	0.60011
3.3	0.05702	0.19085	0.296	0.34702	0.40276	0.50097	0.60019
3.4	0.026692	0.15359	0.2805	0.35092	0.40449	0.50178	0.60038
3.5	0.015031	0.13347	0.26853	0.3526	0.40573	0.50275	0.60093
3.6	0.0081362	0.122	0.26084	0.35409	0.4064	0.50277	0.60112
3.7	0.0049881	0.11497	0.25405	0.35741	0.40726	0.50371	0.6012
3.8	0.0038132	0.1114	0.24805	0.35726	0.40823	0.50308	0.60124
3.9	0.0021283	0.10853	0.23996	0.357	0.41002	0.50366	0.60146
4	0.001441	0.10597	0.23742	0.3556	0.41244	0.50346	0.60141
4.1	0.00086461	0.104	0.22983	0.35454	0.41497	0.50473	0.60196
4.2	0.00048773	0.10395	0.22692	0.35433	0.41929	0.50539	0.6012
4.3	0.00031037	0.10301	0.22272	0.3473	0.42348	0.50534	0.60139
4.4	0.00017736	0.10213	0.2214	0.34742	0.42786	0.50707	0.60175
4.5	0.0002217	0.1018	0.21719	0.34287	0.43361	0.50941	0.6019
4.6	0.00017736	0.10162	0.21339	0.33843	0.44028	0.51099	0.60148
4.7	8.8678e-05	0.10119	0.21189	0.33597	0.4483	0.51531	0.60234
4.8	0.00015519	0.10085	0.20903	0.32972	0.45388	0.51943	0.60281
4.9	8.8678e-05	0.10088	0.20764	0.32469	0.46098	0.52467	0.60338
5	2.217e-05	0.10088	0.20654	0.32025	0.46898	0.53172	0.6039
5.1	0.00015519	0.10094	0.2049	0.31788	0.47515	0.53978	0.60618
5.2	4.4339e-05	0.10061	0.20426	0.31395	0.47606	0.54985	0.60873
5.3	6.6509e-05	0.1007	0.20314	0.31087	0.4774	0.56361	0.61264
5.4	2.217e-05	0.10061	0.20212	0.30738	0.4738	0.57295	0.62012
5.5	0	0.10049	0.20159	0.30641	0.46671	0.58411	0.63021
5.6	4.4339e-05	0.10029	0.20177	0.3049	0.45407	0.59762	0.64531
5.7	0	0.10036	0.20119	0.30339	0.44262	0.59803	0.66824
5.8	0	0.10043	0.20127	0.30239	0.42921	0.59808	0.69957
5.9	0	0.10029	0.20087	0.30242	0.42089	0.58404	0.73207
6	2.217e-05	0.10016	0.20072	0.30162	0.41268	0.56221	0.74977
6.1	6.6509e-05	0.10022	0.20057	0.30093	0.40708	0.54085	0.74395
6.2	2.217e-05	0.10027	0.2005	0.30065	0.40427	0.52406	0.70965
6.3	2.217e-05	0.10002	0.20057	0.30056	0.40232	0.51239	0.67111
6.4	0	0.10004	0.20022	0.30045	0.40162	0.50661	0.63875
6.5	0	0.10007	0.20042	0.30032	0.40109	0.50348	0.61823
6.6	0	0.10002	0.20027	0.30035	0.40078	0.50224	0.60814
6.7	0	0.1	0.2001	0.30013	0.40051	0.5012	0.60363
6.8	0	0.10002	0.20005	0.30009	0.40021	0.50056	0.60203
6.9	0	0.10004	0.2	0.3	0.40019	0.50041	0.60118
7	0	0.1	0.2	0.3	0.40002	0.50003	0.60015
7.1	0	0.1	0.2	0.3	0.4	0.5	0.6
7.2	0	0.1	0.2	0.3	0.4	0.5	0.6
7.3	0	0.1	0.2	0.3	0.4	0.5	0.6
7.4	0	0.1	0.2	0.3	0.4	0.5	0.6
7.5	0	0.1	0.2	0.3	0.4	0.5	0.6
7.6	0	0.1	0.2	0.3	0.4	0.5	0.6
7.7	0	0.1	0.2	0.3	0.4	0.5	0.6
7.8	0	0.1	0.2	0.3	0.4	0.5	0.6
7.9	0	0.1	0.2	0.3	0.4	0.5	0.6
8	0	0.1	0.2	0.3	0.4	0.5	0.6

## Sheet: Fig1S3-J
	PWM 400min, mean light intensities
log10(G)	0 uW	2 uW	6 uW	8 uW	20 uW	40 uW	100 uW
1	0	0.10002	0.2	0.3	0.4	0.5	0.6
1.1	0	0.1	0.2	0.3	0.4	0.5	0.6
1.2	0	0.1	0.2	0.3	0.4	0.5	0.6
1.3	0	0.1	0.2	0.3	0.4	0.5	0.6
1.4	0	0.1	0.2	0.3	0.4	0.5	0.6
1.5	0	0.1	0.2	0.3	0.4	0.5	0.6
1.6	2.217e-05	0.1	0.2	0.3	0.4	0.5	0.6
1.7	0	0.1	0.2	0.3	0.4	0.5	0.6
1.8	2.217e-05	0.1	0.2	0.3	0.4	0.5	0.6
1.9	2.217e-05	0.1	0.2	0.3	0.4	0.5	0.6
2	4.4339e-05	0.1	0.2	0.3	0.4	0.5	0.6
2.1	4.4339e-05	0.1	0.20002	0.3	0.4	0.5	0.6
2.2	0.0002217	0.10002	0.2	0.3	0.4	0.5	0.6
2.3	0.00019953	0.10008	0.2	0.3	0.4	0.5	0.6
2.4	0.0005099	0.10014	0.20004	0.30004	0.4	0.5	0.6
2.5	0.0017957	0.10018	0.20004	0.30002	0.40002	0.5	0.6
2.6	0.0052985	0.10073	0.20014	0.30008	0.40002	0.50004	0.6
2.7	0.022436	0.10243	0.20037	0.3002	0.40002	0.50002	0.60002
2.8	0.08032	0.11049	0.20085	0.30044	0.40016	0.50004	0.60002
2.9	0.17807	0.1342	0.20294	0.30128	0.40028	0.50004	0.60002
3	0.24597	0.17638	0.20752	0.30275	0.40063	0.50025	0.60002
3.1	0.21724	0.20995	0.21387	0.30578	0.40082	0.50044	0.60009
3.2	0.12548	0.23017	0.22471	0.30961	0.40214	0.50069	0.60015
3.3	0.05702	0.2246	0.23421	0.31607	0.40291	0.50129	0.60032
3.4	0.026692	0.20852	0.2432	0.32179	0.40433	0.50219	0.60048
3.5	0.015031	0.18948	0.25154	0.32885	0.40608	0.50246	0.60097
3.6	0.0081362	0.17128	0.26043	0.33386	0.40683	0.50296	0.6011
3.7	0.0049881	0.15801	0.26693	0.34359	0.40846	0.50315	0.60137
3.8	0.0038132	0.14544	0.27285	0.34997	0.41028	0.50319	0.6015
3.9	0.0021283	0.1344	0.2761	0.36007	0.41196	0.50308	0.60158
4	0.001441	0.12622	0.27958	0.36725	0.4154	0.50398	0.60111
4.1	0.00086461	0.11994	0.27538	0.37304	0.42002	0.50454	0.60123
4.2	0.00048773	0.11549	0.27298	0.37764	0.42452	0.50567	0.60117
4.3	0.00031037	0.11122	0.2691	0.38155	0.43326	0.50713	0.60117
4.4	0.00017736	0.10716	0.26026	0.38111	0.43782	0.50883	0.60137
4.5	0.0002217	0.10567	0.24761	0.37479	0.4477	0.51163	0.60173
4.6	0.00017736	0.10361	0.24032	0.36723	0.45775	0.51594	0.60163
4.7	8.8678e-05	0.1028	0.23052	0.35768	0.47141	0.52167	0.60208
4.8	0.00015519	0.10269	0.22191	0.3443	0.48271	0.527	0.60254
4.9	8.8678e-05	0.10178	0.21528	0.33435	0.49205	0.53607	0.60305
5	2.217e-05	0.10126	0.2099	0.32337	0.49159	0.54799	0.60397
5.1	0.00015519	0.1009	0.20615	0.31477	0.4934	0.55809	0.60552
5.2	4.4339e-05	0.10096	0.20429	0.30943	0.48338	0.57587	0.60804
5.3	6.6509e-05	0.10092	0.20263	0.3062	0.46598	0.59258	0.61146
5.4	2.217e-05	0.10053	0.20277	0.30401	0.44875	0.60466	0.619
5.5	0	0.10055	0.20145	0.30281	0.43302	0.61095	0.62719
5.6	4.4339e-05	0.10053	0.20099	0.30205	0.42011	0.60652	0.64311
5.7	0	0.10033	0.20095	0.3012	0.41039	0.59126	0.66423
5.8	0	0.10033	0.20068	0.30084	0.40653	0.56591	0.69346
5.9	0	0.10018	0.20048	0.30044	0.40312	0.54069	0.72779
6	2.217e-05	0.10014	0.20029	0.3004	0.40247	0.52088	0.75037
6.1	6.6509e-05	0.10008	0.20029	0.30052	0.40114	0.51073	0.74822
6.2	2.217e-05	0.1001	0.20012	0.30018	0.40093	0.5051	0.7175
6.3	2.217e-05	0.10006	0.20006	0.30018	0.40056	0.50294	0.67682
6.4	0	0.10002	0.20006	0.30012	0.40051	0.50158	0.64233
6.5	0	0.1	0.20002	0.30004	0.40016	0.50071	0.62084
6.6	0	0.1	0.20004	0.30006	0.40016	0.50056	0.60834
6.7	0	0.1	0.20004	0.30002	0.40007	0.50035	0.60399
6.8	0	0.10002	0.20004	0.3	0.40009	0.50017	0.60195
6.9	0	0.1	0.2	0.30002	0.40002	0.50017	0.6011
7	0	0.1	0.2	0.3	0.4	0.5	0.60006
7.1	0	0.1	0.2	0.3	0.4	0.5	0.6
7.2	0	0.1	0.2	0.3	0.4	0.5	0.6
7.3	0	0.1	0.2	0.3	0.4	0.5	0.6
7.4	0	0.1	0.2	0.3	0.4	0.5	0.6
7.5	0	0.1	0.2	0.3	0.4	0.5	0.6
7.6	0	0.1	0.2	0.3	0.4	0.5	0.6
7.7	0	0.1	0.2	0.3	0.4	0.5	0.6
7.8	0	0.1	0.2	0.3	0.4	0.5	0.6
7.9	0	0.1	0.2	0.3	0.4	0.5	0.6
8	0	0.1	0.2	0.3	0.4	0.5	0.6
