# Supplementary material for: Quantitative control of noise in mammalian gene expression by dynamic histone regulation
Source: eLife. 2021 Aug 11;10:e65654. doi: 10.7554/eLife.65654 (PMC8357418; doi:10.7554/eLife.65654)
Supplement: Figure 1—figure supplement 5—source data 1. [file elife-65654-fig1-figsupp5-data1.xlsx]

## Sheet: Fig1S4A
1	0.6	0.5	0.4	0.3	0.2	0.10009	0.00029854	0.6	0.5	0.40005	0.30015	0.20015	0.10023	0.00078132	0.6	0.5	0.40005	0.30014	0.20019	0.10012	0.0005185
1.1	0.60005	0.50005	0.4	0.3	0.2	0.10005	0	0.60003	0.5	0.40002	0.30002	0.2	0.10008	0.00019005	0.6	0.50002	0.4	0.30005	0.20007	0.10005	0.00024798
1.2	0.6	0.5	0.4	0.30005	0.2	0.10014	4.9756e-05	0.6	0.5	0.4	0.30002	0.20004	0.1001	0.00019005	0.6	0.5	0.4	0.30004	0.20005	0.10012	0.00018035
1.3	0.6	0.50005	0.4	0.3	0.20005	0.10005	0.00014927	0.6	0.5	0.40005	0.30005	0.20009	0.10008	0.00023228	0.60003	0.5	0.40002	0.30002	0.20005	0.10007	0.00020289
1.4	0.6	0.5	0.4	0.30005	0.2	0.10009	0.00014927	0.60007	0.5	0.40005	0.30005	0.20006	0.10008	0.00054903	0.6	0.50002	0.4	0.3	0.20002	0.10012	0.00036069
1.5	0.6	0.5	0.4	0.30005	0.2	0.10005	9.9512e-05	0.60003	0.50002	0.40007	0.30002	0.20015	0.10023	0.00033787	0.60005	0.5	0.4	0.30009	0.20002	0.10012	0.00040578
1.6	0.6	0.5	0.4	0.3	0.20025	0.10014	0.00039805	0.6	0.5	0.40009	0.30007	0.20009	0.10025	0.00054903	0.60003	0.50002	0.40002	0.30007	0.20009	0.10019	0.00058613
1.7	0.6001	0.50005	0.4	0.30005	0.2	0.10032	0.00024878	0.6	0.5	0.40009	0.30007	0.20022	0.10021	0.00097137	0.6	0.5	0.40002	0.30005	0.20007	0.10022	0.00049595
1.8	0.6	0.5	0.40005	0.3001	0.20005	0.10009	0.00064683	0.6	0.50002	0.40009	0.30007	0.20028	0.10031	0.00086578	0.60003	0.50002	0.40007	0.30018	0.20012	0.10022	0.00090173
1.9	0.60005	0.5	0.40005	0.3001	0.2001	0.10023	0.00059707	0.6	0.5	0.4002	0.30017	0.2003	0.10043	0.0013937	0.60005	0.50005	0.40009	0.30025	0.2003	0.10041	0.001037
2	0.6	0.5	0.40016	0.30005	0.2	0.10042	0.00059707	0.6	0.50011	0.40025	0.3001	0.20037	0.10062	0.0017738	0.60005	0.5	0.40007	0.30028	0.20039	0.10022	0.0014202
2.1	0.6	0.5001	0.40005	0.30005	0.20015	0.10028	0.0011941	0.60003	0.50009	0.40027	0.30025	0.20075	0.10105	0.0024918	0.60008	0.50005	0.4	0.30032	0.20044	0.1006	0.0017584
2.2	0.6	0.5001	0.40016	0.30036	0.2001	0.10056	0.0007961	0.6	0.50009	0.40029	0.3003	0.20073	0.10093	0.0032942	0.6	0.50005	0.40019	0.30039	0.20056	0.10103	0.0025249
2.3	0.60019	0.50005	0.40036	0.3001	0.2004	0.10102	0.0012937	0.60013	0.50028	0.40038	0.30037	0.20103	0.10184	0.0046245	0.60003	0.5001	0.40007	0.30075	0.20106	0.10106	0.0035844
2.4	0.60005	0.5001	0.40031	0.30026	0.2005	0.1006	0.0028859	0.60017	0.5005	0.40081	0.30082	0.20164	0.10233	0.0074753	0.60008	0.50012	0.40026	0.30114	0.20125	0.10216	0.0056584
2.5	0.60005	0.50016	0.40042	0.30052	0.20101	0.10143	0.0029356	0.60027	0.50037	0.40122	0.30096	0.20265	0.10429	0.01134	0.60011	0.50029	0.4004	0.30177	0.20192	0.10305	0.0099416
2.6	0.60019	0.50031	0.40057	0.30083	0.20141	0.10255	0.0050751	0.6006	0.50073	0.40128	0.30185	0.20416	0.10603	0.018055	0.60016	0.50019	0.4007	0.3026	0.20299	0.10483	0.015983
2.7	0.60024	0.50052	0.4014	0.3013	0.20232	0.10366	0.0092547	0.60073	0.50112	0.40318	0.30267	0.2066	0.11088	0.032097	0.60029	0.50043	0.40125	0.30411	0.20583	0.10913	0.026488
2.8	0.60029	0.50057	0.40229	0.30203	0.20474	0.10759	0.019355	0.60093	0.50197	0.40496	0.30576	0.21283	0.11975	0.055537	0.60035	0.50089	0.40209	0.30786	0.21	0.1156	0.048716
2.9	0.60068	0.5012	0.40359	0.30416	0.21024	0.11643	0.033585	0.60189	0.50308	0.40838	0.3087	0.22148	0.13247	0.096735	0.60096	0.50219	0.40442	0.31518	0.22005	0.12944	0.089429
3	0.60122	0.5024	0.40883	0.30885	0.21912	0.13087	0.064882	0.60299	0.50523	0.41381	0.31614	0.23758	0.15783	0.15044	0.60112	0.50335	0.40738	0.32448	0.2347	0.15295	0.148
3.1	0.60268	0.50521	0.41559	0.31697	0.23369	0.15601	0.11907	0.60356	0.50707	0.41874	0.32074	0.25093	0.17965	0.20276	0.60157	0.50484	0.40966	0.33561	0.2525	0.17718	0.20893
3.2	0.6038	0.50938	0.42598	0.33034	0.25851	0.18905	0.18942	0.60396	0.50881	0.42198	0.32469	0.26098	0.19344	0.21074	0.60224	0.50486	0.41419	0.34184	0.26669	0.19729	0.22138
3.3	0.60531	0.51173	0.43736	0.34304	0.28377	0.22414	0.2345	0.60409	0.50714	0.42018	0.32153	0.25524	0.18475	0.13529	0.6021	0.50529	0.41579	0.33791	0.26324	0.18797	0.14728
3.4	0.60506	0.51408	0.44339	0.34533	0.29134	0.23178	0.1949	0.60259	0.50594	0.41766	0.31775	0.24101	0.16107	0.049645	0.60136	0.50404	0.41292	0.33071	0.24838	0.16785	0.052909
3.5	0.60414	0.51376	0.4369	0.33867	0.27212	0.19604	0.093044	0.60293	0.5059	0.41498	0.31656	0.23592	0.1464	0.0089323	0.60131	0.50407	0.41086	0.32615	0.23752	0.14689	0.0086341
3.6	0.60453	0.51272	0.42973	0.33487	0.25341	0.16281	0.020947	0.60289	0.50503	0.41408	0.31733	0.23265	0.14029	0.0015204	0.60144	0.50414	0.40959	0.32343	0.2321	0.13939	0.0011723
3.7	0.60389	0.51272	0.42837	0.33159	0.2462	0.14582	0.0023883	0.60269	0.50567	0.41707	0.31725	0.23101	0.13746	0.0003801	0.60107	0.50486	0.41097	0.32254	0.22988	0.13771	0.00040578
3.8	0.60482	0.51189	0.4304	0.33003	0.2409	0.14175	0.00054732	0.60293	0.50735	0.41761	0.31723	0.23273	0.13971	0.00023228	0.60131	0.50407	0.41112	0.32429	0.23331	0.13574	0.00018035
3.9	0.6056	0.51272	0.43154	0.3317	0.23838	0.13309	0	0.60342	0.50721	0.41973	0.32046	0.23681	0.13862	8.4467e-05	0.60184	0.50602	0.41276	0.32685	0.2315	0.13502	0.0001578
4	0.60677	0.5159	0.43456	0.33659	0.24287	0.13592	0.00029854	0.60452	0.50904	0.42223	0.32439	0.23832	0.13732	4.2233e-05	0.60272	0.50631	0.41415	0.32938	0.23405	0.13521	0.00020289
4.1	0.60818	0.51825	0.43768	0.33867	0.23909	0.13416	0.00014927	0.60519	0.51026	0.42624	0.32813	0.24036	0.13717	0.00016893	0.60285	0.50741	0.41802	0.33187	0.23474	0.13624	9.0173e-05
4.2	0.61027	0.52247	0.43887	0.3445	0.24201	0.12893	0.00014927	0.60568	0.51214	0.42689	0.32995	0.24211	0.1381	6.335e-05	0.60341	0.50883	0.42091	0.33338	0.23539	0.13384	9.0173e-05
4.3	0.61212	0.52659	0.4422	0.34773	0.23879	0.12847	4.9756e-05	0.60781	0.51559	0.43093	0.3345	0.24272	0.1374	0.00016893	0.60384	0.51102	0.42341	0.337	0.23752	0.13257	6.763e-05
4.4	0.61636	0.53008	0.44376	0.34835	0.24353	0.12578	4.9756e-05	0.60947	0.5182	0.43651	0.33774	0.24543	0.13455	2.1117e-05	0.60511	0.51307	0.42766	0.34367	0.23886	0.13146	2.2543e-05
4.5	0.62015	0.53488	0.45114	0.35366	0.24232	0.12217	0	0.61213	0.52148	0.44386	0.3431	0.24632	0.13257	0	0.60583	0.51677	0.43069	0.34635	0.24069	0.13125	4.5087e-05
4.6	0.6257	0.54228	0.45555	0.35408	0.23773	0.1218	0	0.61669	0.52736	0.44827	0.34906	0.2478	0.12875	0	0.60815	0.51976	0.44035	0.3487	0.24146	0.12908	0
4.7	0.63369	0.54677	0.45945	0.35605	0.23541	0.11662	0	0.61995	0.5345	0.45323	0.35744	0.24882	0.12638	0	0.60967	0.52604	0.44843	0.35453	0.24405	0.12843	0
4.8	0.64162	0.56303	0.45841	0.35548	0.23314	0.11203	0	0.62909	0.54301	0.45956	0.36463	0.24435	0.1218	0	0.61683	0.53489	0.45842	0.35843	0.24199	0.12435	0
4.9	0.65642	0.57294	0.46459	0.35506	0.22522	0.10926	0	0.63992	0.55506	0.47071	0.36811	0.24142	0.11585	0	0.622	0.54507	0.47315	0.36194	0.2419	0.12264	0
5	0.67429	0.58488	0.46033	0.3522	0.2226	0.10694	0	0.65196	0.57113	0.47559	0.37449	0.23362	0.113	0	0.63247	0.56086	0.48791	0.3621	0.23877	0.118	0
5.1	0.69162	0.5929	0.45155	0.34684	0.21609	0.1043	0	0.67197	0.59101	0.478	0.37835	0.22456	0.10776	0	0.65393	0.58637	0.50196	0.35725	0.2344	0.11317	0
5.2	0.72039	0.59661	0.44381	0.33565	0.20973	0.10282	0	0.70551	0.613	0.47798	0.37195	0.21697	0.10466	2.1117e-05	0.68909	0.62134	0.50558	0.34723	0.22655	0.10918	0
5.3	0.72891	0.58884	0.42728	0.32462	0.20691	0.10102	0	0.74291	0.62741	0.46625	0.35667	0.21082	0.10215	0	0.74614	0.64651	0.4939	0.3315	0.21826	0.1044	0
5.4	0.72808	0.56851	0.41658	0.31468	0.20308	0.10171	0	0.76143	0.62004	0.44586	0.33764	0.20492	0.10072	0	0.79898	0.64841	0.46763	0.31611	0.20933	0.10192	0
5.5	0.6921	0.54489	0.40935	0.30926	0.20146	0.10051	0	0.74617	0.58761	0.42532	0.32024	0.20213	0.10033	0	0.78944	0.60786	0.43781	0.30807	0.20468	0.10103	0
5.6	0.65107	0.5233	0.40468	0.30328	0.20096	0.10019	0	0.68706	0.54517	0.4109	0.30816	0.2006	0.10004	0	0.71884	0.55754	0.41734	0.30254	0.20153	0.10031	0
5.7	0.62541	0.50964	0.40171	0.30114	0.20015	0.10019	0	0.63344	0.51786	0.40324	0.30264	0.20017	0.10002	0	0.65015	0.52289	0.4054	0.30072	0.20044	0.10012	0
5.8	0.6094	0.50485	0.40057	0.30036	0.2	0.10005	0	0.60894	0.50519	0.40068	0.30059	0.20004	0.1	0	0.61715	0.50705	0.4019	0.30012	0.20005	0.10002	0
5.9	0.60331	0.50151	0.40026	0.30026	0.20005	0.1	0	0.60256	0.50099	0.40018	0.30005	0.20002	0.1	0	0.60445	0.50171	0.40033	0.3	0.20007	0.1	0
6	0.60088	0.50078	0.40016	0.30005	0.2001	0.1	0	0.60053	0.50016	0.4	0.3	0.2	0.1	0	0.60088	0.50029	0.40007	0.3	0.2	0.1	0
6.1	0.60034	0.50021	0.4	0.3	0.2	0.1	0	0.60013	0.5	0.4	0.3	0.2	0.1	0	0.60035	0.50002	0.4	0.3	0.2	0.1	0
6.2	0.6	0.5	0.4	0.3	0.2	0.1	0	0.6	0.50002	0.4	0.3	0.2	0.1	0	0.60011	0.5	0.4	0.3	0.2	0.1	0
6.3	0.6	0.5	0.4	0.3	0.2	0.1	0	0.6	0.5	0.4	0.3	0.2	0.1	0	0.6	0.5	0.4	0.3	0.2	0.1	0
6.4	0.6	0.5	0.4	0.3	0.2	0.1	0	0.6	0.5	0.4	0.3	0.2	0.1	0	0.6	0.5	0.4	0.3	0.2	0.1	0
6.5	0.6	0.5	0.4	0.3	0.2	0.1	0	0.6	0.5	0.4	0.3	0.2	0.1	0	0.6	0.5	0.4	0.3	0.2	0.1	0
6.6	0.6	0.5	0.4	0.3	0.2	0.1	0	0.6	0.5	0.4	0.3	0.2	0.1	0	0.6	0.5	0.4	0.3	0.2	0.1	0
6.7	0.6	0.5	0.4	0.3	0.2	0.1	0	0.6	0.5	0.4	0.3	0.2	0.1	0	0.6	0.5	0.4	0.3	0.2	0.1	0
6.8	0.6	0.5	0.4	0.3	0.2	0.1	0	0.6	0.5	0.4	0.3	0.2	0.1	0	0.6	0.5	0.4	0.3	0.2	0.1	0
6.9	0.6	0.5	0.4	0.3	0.2	0.1	0	0.6	0.5	0.4	0.3	0.2	0.1	0	0.6	0.5	0.4	0.3	0.2	0.1	0
7	0.6	0.5	0.4	0.3	0.2	0.1	0	0.6	0.5	0.4	0.3	0.2	0.1	0	0.6	0.5	0.4	0.3	0.2	0.1	0
7.1	0.6	0.5	0.4	0.3	0.2	0.1	0	0.6	0.5	0.4	0.3	0.2	0.1	0	0.6	0.5	0.4	0.3	0.2	0.1	0
7.2	0.6	0.5	0.4	0.3	0.2	0.1	0	0.6	0.5	0.4	0.3	0.2	0.1	0	0.6	0.5	0.4	0.3	0.2	0.1	0
7.3	0.6	0.5	0.4	0.3	0.2	0.1	0	0.6	0.5	0.4	0.3	0.2	0.1	0	0.6	0.5	0.4	0.3	0.2	0.1	0
7.4	0.6	0.5	0.4	0.3	0.2	0.1	0	0.6	0.5	0.4	0.3	0.2	0.1	0	0.6	0.5	0.4	0.3	0.2	0.1	0
7.5	0.6	0.5	0.4	0.3	0.2	0.1	0	0.6	0.5	0.4	0.3	0.2	0.1	0	0.6	0.5	0.4	0.3	0.2	0.1	0
7.6	0.6	0.5	0.4	0.3	0.2	0.1	0	0.6	0.5	0.4	0.3	0.2	0.1	0	0.6	0.5	0.4	0.3	0.2	0.1	0
7.7	0.6	0.5	0.4	0.3	0.2	0.1	0	0.6	0.5	0.4	0.3	0.2	0.1	0	0.6	0.5	0.4	0.3	0.2	0.1	0
7.8	0.6	0.5	0.4	0.3	0.2	0.1	0	0.6	0.5	0.4	0.3	0.2	0.1	0	0.6	0.5	0.4	0.3	0.2	0.1	0
7.9	0.6	0.5	0.4	0.3	0.2	0.1	0	0.6	0.5	0.4	0.3	0.2	0.1	0	0.6	0.5	0.4	0.3	0.2	0.1	0
8	0.6	0.5	0.4	0.3	0.2	0.1	0	0.6	0.5	0.4	0.3	0.2	0.1	0	0.6	0.5	0.4	0.3	0.2	0.1	0

## Sheet: Fig1S4B
sample,ng in 100 ng HeLa genomic DNA	copies	ct	ct	ct	cell no./100ng HeLa genomic DNA		log2(mCardinal molecule no)	ct		log2(mCardinal molecule no)	SD log2(mCardinal molecule no)	log2(ct)	SD log2(ct)
5	288000000	10.16	9.89	9.83	11700		28.206	9	clone 1	15.131	0.30143	23.203	0.32747
0.5	28800000	13.09	13.01	13.08	11700		28.196	9.01	clone 2	16.914	0.2429	21.267	0.26388
0.05	2880000	16.09	15.78	15.66	11700		28.187	9.02	clone 3	15.877	0.46294	22.393	0.50292
0.005	288000	18.83	18.5	18.22	11700		28.178	9.03
0.0005	28800	23.54	23.75	23.69	11700		28.169	9.04
5e-05	2880	27.64	27.25	27.19	11700		28.159	9.05
							28.15	9.06
							28.141	9.07
							28.132	9.08
							28.123	9.09
							28.113	9.1
							28.104	9.11
							28.095	9.12
							28.086	9.13
							28.077	9.14
							28.067	9.15
							28.058	9.16
							28.049	9.17
							28.04	9.18
							28.031	9.19
							28.021	9.2
							28.012	9.21
							28.003	9.22
							27.994	9.23
							27.985	9.24
							27.975	9.25
							27.966	9.26
							27.957	9.27
							27.948	9.28
							27.939	9.29
							27.929	9.3
							27.92	9.31
							27.911	9.32
							27.902	9.33
							27.893	9.34
							27.883	9.35
							27.874	9.36
							27.865	9.37
							27.856	9.38
							27.847	9.39
							27.837	9.4
							27.828	9.41
							27.819	9.42
							27.81	9.43
							27.8	9.44
							27.791	9.45
							27.782	9.46
							27.773	9.47
							27.764	9.48
							27.754	9.49
							27.745	9.5
							27.736	9.51
							27.727	9.52
							27.718	9.53
							27.708	9.54
							27.699	9.55
							27.69	9.56
							27.681	9.57
							27.672	9.58
							27.662	9.59
							27.653	9.6
							27.644	9.61
							27.635	9.62
							27.626	9.63
							27.616	9.64
							27.607	9.65
							27.598	9.66
							27.589	9.67
							27.58	9.68
							27.57	9.69
							27.561	9.7
							27.552	9.71
							27.543	9.72
							27.534	9.73
							27.524	9.74
							27.515	9.75
							27.506	9.76
							27.497	9.77
							27.488	9.78
							27.478	9.79
							27.469	9.8
							27.46	9.81
							27.451	9.82
							27.441	9.83
							27.432	9.84
							27.423	9.85
							27.414	9.86
							27.405	9.87
							27.395	9.88
							27.386	9.89
							27.377	9.9
							27.368	9.91
							27.359	9.92
							27.349	9.93
							27.34	9.94
							27.331	9.95
							27.322	9.96
							27.313	9.97
							27.303	9.98
							27.294	9.99
							27.285	10
							27.276	10.01
							27.267	10.02
							27.257	10.03
							27.248	10.04
							27.239	10.05
							27.23	10.06
							27.221	10.07
							27.211	10.08
							27.202	10.09
							27.193	10.1
							27.184	10.11
							27.175	10.12
							27.165	10.13
							27.156	10.14
							27.147	10.15
							27.138	10.16
							27.129	10.17
							27.119	10.18
							27.11	10.19
							27.101	10.2
							27.092	10.21
							27.082	10.22
							27.073	10.23
							27.064	10.24
							27.055	10.25
							27.046	10.26
							27.036	10.27
							27.027	10.28
							27.018	10.29
							27.009	10.3
							27	10.31
							26.99	10.32
							26.981	10.33
							26.972	10.34
							26.963	10.35
							26.954	10.36
							26.944	10.37
							26.935	10.38
							26.926	10.39
							26.917	10.4
							26.908	10.41
							26.898	10.42
							26.889	10.43
							26.88	10.44
							26.871	10.45
							26.862	10.46
							26.852	10.47
							26.843	10.48
							26.834	10.49
							26.825	10.5
							26.816	10.51
							26.806	10.52
							26.797	10.53
							26.788	10.54
							26.779	10.55
							26.77	10.56
							26.76	10.57
							26.751	10.58
							26.742	10.59
							26.733	10.6
							26.723	10.61
							26.714	10.62
							26.705	10.63
							26.696	10.64
							26.687	10.65
							26.677	10.66
							26.668	10.67
							26.659	10.68
							26.65	10.69
							26.641	10.7
							26.631	10.71
							26.622	10.72
							26.613	10.73
							26.604	10.74
							26.595	10.75
							26.585	10.76
							26.576	10.77
							26.567	10.78
							26.558	10.79
							26.549	10.8
							26.539	10.81
							26.53	10.82
							26.521	10.83
							26.512	10.84
							26.503	10.85
							26.493	10.86
							26.484	10.87
							26.475	10.88
							26.466	10.89
							26.457	10.9
							26.447	10.91
							26.438	10.92
							26.429	10.93
							26.42	10.94
							26.411	10.95
							26.401	10.96
							26.392	10.97
							26.383	10.98
							26.374	10.99
							26.364	11
							26.355	11.01
							26.346	11.02
							26.337	11.03
							26.328	11.04
							26.318	11.05
							26.309	11.06
							26.3	11.07
							26.291	11.08
							26.282	11.09
							26.272	11.1
							26.263	11.11
							26.254	11.12
							26.245	11.13
							26.236	11.14
							26.226	11.15
							26.217	11.16
							26.208	11.17
							26.199	11.18
							26.19	11.19
							26.18	11.2
							26.171	11.21
							26.162	11.22
							26.153	11.23
							26.144	11.24
							26.134	11.25
							26.125	11.26
							26.116	11.27
							26.107	11.28
							26.098	11.29
							26.088	11.3
							26.079	11.31
							26.07	11.32
							26.061	11.33
							26.052	11.34
							26.042	11.35
							26.033	11.36
							26.024	11.37
							26.015	11.38
							26.006	11.39
							25.996	11.4
							25.987	11.41
							25.978	11.42
							25.969	11.43
							25.959	11.44
							25.95	11.45
							25.941	11.46
							25.932	11.47
							25.923	11.48
							25.913	11.49
							25.904	11.5
							25.895	11.51
							25.886	11.52
							25.877	11.53
							25.867	11.54
							25.858	11.55
							25.849	11.56
							25.84	11.57
							25.831	11.58
							25.821	11.59
							25.812	11.6
							25.803	11.61
							25.794	11.62
							25.785	11.63
							25.775	11.64
							25.766	11.65
							25.757	11.66
							25.748	11.67
							25.739	11.68
							25.729	11.69
							25.72	11.7
							25.711	11.71
							25.702	11.72
							25.693	11.73
							25.683	11.74
							25.674	11.75
							25.665	11.76
							25.656	11.77
							25.647	11.78
							25.637	11.79
							25.628	11.8
							25.619	11.81
							25.61	11.82
							25.6	11.83
							25.591	11.84
							25.582	11.85
							25.573	11.86
							25.564	11.87
							25.554	11.88
							25.545	11.89
							25.536	11.9
							25.527	11.91
							25.518	11.92
							25.508	11.93
							25.499	11.94
							25.49	11.95
							25.481	11.96
							25.472	11.97
							25.462	11.98
							25.453	11.99
							25.444	12
							25.435	12.01
							25.426	12.02
							25.416	12.03
							25.407	12.04
							25.398	12.05
							25.389	12.06
							25.38	12.07
							25.37	12.08
							25.361	12.09
							25.352	12.1
							25.343	12.11
							25.334	12.12
							25.324	12.13
							25.315	12.14
							25.306	12.15
							25.297	12.16
							25.288	12.17
							25.278	12.18
							25.269	12.19
							25.26	12.2
							25.251	12.21
							25.241	12.22
							25.232	12.23
							25.223	12.24
							25.214	12.25
							25.205	12.26
							25.195	12.27
							25.186	12.28
							25.177	12.29
							25.168	12.3
							25.159	12.31
							25.149	12.32
							25.14	12.33
							25.131	12.34
							25.122	12.35
							25.113	12.36
							25.103	12.37
							25.094	12.38
							25.085	12.39
							25.076	12.4
							25.067	12.41
							25.057	12.42
							25.048	12.43
							25.039	12.44
							25.03	12.45
							25.021	12.46
							25.011	12.47
							25.002	12.48
							24.993	12.49
							24.984	12.5
							24.975	12.51
							24.965	12.52
							24.956	12.53
							24.947	12.54
							24.938	12.55
							24.929	12.56
							24.919	12.57
							24.91	12.58
							24.901	12.59
							24.892	12.6
							24.882	12.61
							24.873	12.62
							24.864	12.63
							24.855	12.64
							24.846	12.65
							24.836	12.66
							24.827	12.67
							24.818	12.68
							24.809	12.69
							24.8	12.7
							24.79	12.71
							24.781	12.72
							24.772	12.73
							24.763	12.74
							24.754	12.75
							24.744	12.76
							24.735	12.77
							24.726	12.78
							24.717	12.79
							24.708	12.8
							24.698	12.81
							24.689	12.82
							24.68	12.83
							24.671	12.84
							24.662	12.85
							24.652	12.86
							24.643	12.87
							24.634	12.88
							24.625	12.89
							24.616	12.9
							24.606	12.91
							24.597	12.92
							24.588	12.93
							24.579	12.94
							24.57	12.95
							24.56	12.96
							24.551	12.97
							24.542	12.98
							24.533	12.99
							24.524	13
							24.514	13.01
							24.505	13.02
							24.496	13.03
							24.487	13.04
							24.477	13.05
							24.468	13.06
							24.459	13.07
							24.45	13.08
							24.441	13.09
							24.431	13.1
							24.422	13.11
							24.413	13.12
							24.404	13.13
							24.395	13.14
							24.385	13.15
							24.376	13.16
							24.367	13.17
							24.358	13.18
							24.349	13.19
							24.339	13.2
							24.33	13.21
							24.321	13.22
							24.312	13.23
							24.303	13.24
							24.293	13.25
							24.284	13.26
							24.275	13.27
							24.266	13.28
							24.257	13.29
							24.247	13.3
							24.238	13.31
							24.229	13.32
							24.22	13.33
							24.211	13.34
							24.201	13.35
							24.192	13.36
							24.183	13.37
							24.174	13.38
							24.165	13.39
							24.155	13.4
							24.146	13.41
							24.137	13.42
							24.128	13.43
							24.118	13.44
							24.109	13.45
							24.1	13.46
							24.091	13.47
							24.082	13.48
							24.072	13.49
							24.063	13.5
							24.054	13.51
							24.045	13.52
							24.036	13.53
							24.026	13.54
							24.017	13.55
							24.008	13.56
							23.999	13.57
							23.99	13.58
							23.98	13.59
							23.971	13.6
							23.962	13.61
							23.953	13.62
							23.944	13.63
							23.934	13.64
							23.925	13.65
							23.916	13.66
							23.907	13.67
							23.898	13.68
							23.888	13.69
							23.879	13.7
							23.87	13.71
							23.861	13.72
							23.852	13.73
							23.842	13.74
							23.833	13.75
							23.824	13.76
							23.815	13.77
							23.806	13.78
							23.796	13.79
							23.787	13.8
							23.778	13.81
							23.769	13.82
							23.759	13.83
							23.75	13.84
							23.741	13.85
							23.732	13.86
							23.723	13.87
							23.713	13.88
							23.704	13.89
							23.695	13.9
							23.686	13.91
							23.677	13.92
							23.667	13.93
							23.658	13.94
							23.649	13.95
							23.64	13.96
							23.631	13.97
							23.621	13.98
							23.612	13.99
							23.603	14
							23.594	14.01
							23.585	14.02
							23.575	14.03
							23.566	14.04
							23.557	14.05
							23.548	14.06
							23.539	14.07
							23.529	14.08
							23.52	14.09
							23.511	14.1
							23.502	14.11
							23.493	14.12
							23.483	14.13
							23.474	14.14
							23.465	14.15
							23.456	14.16
							23.447	14.17
							23.437	14.18
							23.428	14.19
							23.419	14.2
							23.41	14.21
							23.4	14.22
							23.391	14.23
							23.382	14.24
							23.373	14.25
							23.364	14.26
							23.354	14.27
							23.345	14.28
							23.336	14.29
							23.327	14.3
							23.318	14.31
							23.308	14.32
							23.299	14.33
							23.29	14.34
							23.281	14.35
							23.272	14.36
							23.262	14.37
							23.253	14.38
							23.244	14.39
							23.235	14.4
							23.226	14.41
							23.216	14.42
							23.207	14.43
							23.198	14.44
							23.189	14.45
							23.18	14.46
							23.17	14.47
							23.161	14.48
							23.152	14.49
							23.143	14.5
							23.134	14.51
							23.124	14.52
							23.115	14.53
							23.106	14.54
							23.097	14.55
							23.088	14.56
							23.078	14.57
							23.069	14.58
							23.06	14.59
							23.051	14.6
							23.041	14.61
							23.032	14.62
							23.023	14.63
							23.014	14.64
							23.005	14.65
							22.995	14.66
							22.986	14.67
							22.977	14.68
							22.968	14.69
							22.959	14.7
							22.949	14.71
							22.94	14.72
							22.931	14.73
							22.922	14.74
							22.913	14.75
							22.903	14.76
							22.894	14.77
							22.885	14.78
							22.876	14.79
							22.867	14.8
							22.857	14.81
							22.848	14.82
							22.839	14.83
							22.83	14.84
							22.821	14.85
							22.811	14.86
							22.802	14.87
							22.793	14.88
							22.784	14.89
							22.775	14.9
							22.765	14.91
							22.756	14.92
							22.747	14.93
							22.738	14.94
							22.729	14.95
							22.719	14.96
							22.71	14.97
							22.701	14.98
							22.692	14.99
							22.683	15
							22.673	15.01
							22.664	15.02
							22.655	15.03
							22.646	15.04
							22.636	15.05
							22.627	15.06
							22.618	15.07
							22.609	15.08
							22.6	15.09
							22.59	15.1
							22.581	15.11
							22.572	15.12
							22.563	15.13
							22.554	15.14
							22.544	15.15
							22.535	15.16
							22.526	15.17
							22.517	15.18
							22.508	15.19
							22.498	15.2
							22.489	15.21
							22.48	15.22
							22.471	15.23
							22.462	15.24
							22.452	15.25
							22.443	15.26
							22.434	15.27
							22.425	15.28
							22.416	15.29
							22.406	15.3
							22.397	15.31
							22.388	15.32
							22.379	15.33
							22.37	15.34
							22.36	15.35
							22.351	15.36
							22.342	15.37
							22.333	15.38
							22.324	15.39
							22.314	15.4
							22.305	15.41
							22.296	15.42
							22.287	15.43
							22.277	15.44
							22.268	15.45
							22.259	15.46
							22.25	15.47
							22.241	15.48
							22.231	15.49
							22.222	15.5
							22.213	15.51
							22.204	15.52
							22.195	15.53
							22.185	15.54
							22.176	15.55
							22.167	15.56
							22.158	15.57
							22.149	15.58
							22.139	15.59
							22.13	15.6
							22.121	15.61
							22.112	15.62
							22.103	15.63
							22.093	15.64
							22.084	15.65
							22.075	15.66
							22.066	15.67
							22.057	15.68
							22.047	15.69
							22.038	15.7
							22.029	15.71
							22.02	15.72
							22.011	15.73
							22.001	15.74
							21.992	15.75
							21.983	15.76
							21.974	15.77
							21.965	15.78
							21.955	15.79
							21.946	15.8
							21.937	15.81
							21.928	15.82
							21.918	15.83
							21.909	15.84
							21.9	15.85
							21.891	15.86
							21.882	15.87
							21.872	15.88
							21.863	15.89
							21.854	15.9
							21.845	15.91
							21.836	15.92
							21.826	15.93
							21.817	15.94
							21.808	15.95
							21.799	15.96
							21.79	15.97
							21.78	15.98
							21.771	15.99
							21.762	16
							21.753	16.01
							21.744	16.02
							21.734	16.03
							21.725	16.04
							21.716	16.05
							21.707	16.06
							21.698	16.07
							21.688	16.08
							21.679	16.09
							21.67	16.1
							21.661	16.11
							21.652	16.12
							21.642	16.13
							21.633	16.14
							21.624	16.15
							21.615	16.16
							21.606	16.17
							21.596	16.18
							21.587	16.19
							21.578	16.2
							21.569	16.21
							21.559	16.22
							21.55	16.23
							21.541	16.24
							21.532	16.25
							21.523	16.26
							21.513	16.27
							21.504	16.28
							21.495	16.29
							21.486	16.3
							21.477	16.31
							21.467	16.32
							21.458	16.33
							21.449	16.34
							21.44	16.35
							21.431	16.36
							21.421	16.37
							21.412	16.38
							21.403	16.39
							21.394	16.4
							21.385	16.41
							21.375	16.42
							21.366	16.43
							21.357	16.44
							21.348	16.45
							21.339	16.46
							21.329	16.47
							21.32	16.48
							21.311	16.49
							21.302	16.5
							21.293	16.51
							21.283	16.52
							21.274	16.53
							21.265	16.54
							21.256	16.55
							21.247	16.56
							21.237	16.57
							21.228	16.58
							21.219	16.59
							21.21	16.6
							21.2	16.61
							21.191	16.62
							21.182	16.63
							21.173	16.64
							21.164	16.65
							21.154	16.66
							21.145	16.67
							21.136	16.68
							21.127	16.69
							21.118	16.7
							21.108	16.71
							21.099	16.72
							21.09	16.73
							21.081	16.74
							21.072	16.75
							21.062	16.76
							21.053	16.77
							21.044	16.78
							21.035	16.79
							21.026	16.8
							21.016	16.81
							21.007	16.82
							20.998	16.83
							20.989	16.84
							20.98	16.85
							20.97	16.86
							20.961	16.87
							20.952	16.88
							20.943	16.89
							20.934	16.9
							20.924	16.91
							20.915	16.92
							20.906	16.93
							20.897	16.94
							20.888	16.95
							20.878	16.96
							20.869	16.97
							20.86	16.98
							20.851	16.99
							20.842	17
							20.832	17.01
							20.823	17.02
							20.814	17.03
							20.805	17.04
							20.795	17.05
							20.786	17.06
							20.777	17.07
							20.768	17.08
							20.759	17.09
							20.749	17.1
							20.74	17.11
							20.731	17.12
							20.722	17.13
							20.713	17.14
							20.703	17.15
							20.694	17.16
							20.685	17.17
							20.676	17.18
							20.667	17.19
							20.657	17.2
							20.648	17.21
							20.639	17.22
							20.63	17.23
							20.621	17.24
							20.611	17.25
							20.602	17.26
							20.593	17.27
							20.584	17.28
							20.575	17.29
							20.565	17.3
							20.556	17.31
							20.547	17.32
							20.538	17.33
							20.529	17.34
							20.519	17.35
							20.51	17.36
							20.501	17.37
							20.492	17.38
							20.483	17.39
							20.473	17.4
							20.464	17.41
							20.455	17.42
							20.446	17.43
							20.436	17.44
							20.427	17.45
							20.418	17.46
							20.409	17.47
							20.4	17.48
							20.39	17.49
							20.381	17.5
							20.372	17.51
							20.363	17.52
							20.354	17.53
							20.344	17.54
							20.335	17.55
							20.326	17.56
							20.317	17.57
							20.308	17.58
							20.298	17.59
							20.289	17.6
							20.28	17.61
							20.271	17.62
							20.262	17.63
							20.252	17.64
							20.243	17.65
							20.234	17.66
							20.225	17.67
							20.216	17.68
							20.206	17.69
							20.197	17.7
							20.188	17.71
							20.179	17.72
							20.17	17.73
							20.16	17.74
							20.151	17.75
							20.142	17.76
							20.133	17.77
							20.124	17.78
							20.114	17.79
							20.105	17.8
							20.096	17.81
							20.087	17.82
							20.077	17.83
							20.068	17.84
							20.059	17.85
							20.05	17.86
							20.041	17.87
							20.031	17.88
							20.022	17.89
							20.013	17.9
							20.004	17.91
							19.995	17.92
							19.985	17.93
							19.976	17.94
							19.967	17.95
							19.958	17.96
							19.949	17.97
							19.939	17.98
							19.93	17.99
							19.921	18
							19.912	18.01
							19.903	18.02
							19.893	18.03
							19.884	18.04
							19.875	18.05
							19.866	18.06
							19.857	18.07
							19.847	18.08
							19.838	18.09
							19.829	18.1
							19.82	18.11
							19.811	18.12
							19.801	18.13
							19.792	18.14
							19.783	18.15
							19.774	18.16
							19.765	18.17
							19.755	18.18
							19.746	18.19
							19.737	18.2
							19.728	18.21
							19.718	18.22
							19.709	18.23
							19.7	18.24
							19.691	18.25
							19.682	18.26
							19.672	18.27
							19.663	18.28
							19.654	18.29
							19.645	18.3
							19.636	18.31
							19.626	18.32
							19.617	18.33
							19.608	18.34
							19.599	18.35
							19.59	18.36
							19.58	18.37
							19.571	18.38
							19.562	18.39
							19.553	18.4
							19.544	18.41
							19.534	18.42
							19.525	18.43
							19.516	18.44
							19.507	18.45
							19.498	18.46
							19.488	18.47
							19.479	18.48
							19.47	18.49
							19.461	18.5
							19.452	18.51
							19.442	18.52
							19.433	18.53
							19.424	18.54
							19.415	18.55
							19.406	18.56
							19.396	18.57
							19.387	18.58
							19.378	18.59
							19.369	18.6
							19.359	18.61
							19.35	18.62
							19.341	18.63
							19.332	18.64
							19.323	18.65
							19.313	18.66
							19.304	18.67
							19.295	18.68
							19.286	18.69
							19.277	18.7
							19.267	18.71
							19.258	18.72
							19.249	18.73
							19.24	18.74
							19.231	18.75
							19.221	18.76
							19.212	18.77
							19.203	18.78
							19.194	18.79
							19.185	18.8
							19.175	18.81
							19.166	18.82
							19.157	18.83
							19.148	18.84
							19.139	18.85
							19.129	18.86
							19.12	18.87
							19.111	18.88
							19.102	18.89
							19.093	18.9
							19.083	18.91
							19.074	18.92
							19.065	18.93
							19.056	18.94
							19.047	18.95
							19.037	18.96
							19.028	18.97
							19.019	18.98
							19.01	18.99
							19.001	19
							18.991	19.01
							18.982	19.02
							18.973	19.03
							18.964	19.04
							18.954	19.05
							18.945	19.06
							18.936	19.07
							18.927	19.08
							18.918	19.09
							18.908	19.1
							18.899	19.11
							18.89	19.12
							18.881	19.13
							18.872	19.14
							18.862	19.15
							18.853	19.16
							18.844	19.17
							18.835	19.18
							18.826	19.19
							18.816	19.2
							18.807	19.21
							18.798	19.22
							18.789	19.23
							18.78	19.24
							18.77	19.25
							18.761	19.26
							18.752	19.27
							18.743	19.28
							18.734	19.29
							18.724	19.3
							18.715	19.31
							18.706	19.32
							18.697	19.33
							18.688	19.34
							18.678	19.35
							18.669	19.36
							18.66	19.37
							18.651	19.38
							18.642	19.39
							18.632	19.4
							18.623	19.41
							18.614	19.42
							18.605	19.43
							18.595	19.44
							18.586	19.45
							18.577	19.46
							18.568	19.47
							18.559	19.48
							18.549	19.49
							18.54	19.5
							18.531	19.51
							18.522	19.52
							18.513	19.53
							18.503	19.54
							18.494	19.55
							18.485	19.56
							18.476	19.57
							18.467	19.58
							18.457	19.59
							18.448	19.6
							18.439	19.61
							18.43	19.62
							18.421	19.63
							18.411	19.64
							18.402	19.65
							18.393	19.66
							18.384	19.67
							18.375	19.68
							18.365	19.69
							18.356	19.7
							18.347	19.71
							18.338	19.72
							18.329	19.73
							18.319	19.74
							18.31	19.75
							18.301	19.76
							18.292	19.77
							18.283	19.78
							18.273	19.79
							18.264	19.8
							18.255	19.81
							18.246	19.82
							18.236	19.83
							18.227	19.84
							18.218	19.85
							18.209	19.86
							18.2	19.87
							18.19	19.88
							18.181	19.89
							18.172	19.9
							18.163	19.91
							18.154	19.92
							18.144	19.93
							18.135	19.94
							18.126	19.95
							18.117	19.96
							18.108	19.97
							18.098	19.98
							18.089	19.99
							18.08	20
							18.071	20.01
							18.062	20.02
							18.052	20.03
							18.043	20.04
							18.034	20.05
							18.025	20.06
							18.016	20.07
							18.006	20.08
							17.997	20.09
							17.988	20.1
							17.979	20.11
							17.97	20.12
							17.96	20.13
							17.951	20.14
							17.942	20.15
							17.933	20.16
							17.924	20.17
							17.914	20.18
							17.905	20.19
							17.896	20.2
							17.887	20.21
							17.877	20.22
							17.868	20.23
							17.859	20.24
							17.85	20.25
							17.841	20.26
							17.831	20.27
							17.822	20.28
							17.813	20.29
							17.804	20.3
							17.795	20.31
							17.785	20.32
							17.776	20.33
							17.767	20.34
							17.758	20.35
							17.749	20.36
							17.739	20.37
							17.73	20.38
							17.721	20.39
							17.712	20.4
							17.703	20.41
							17.693	20.42
							17.684	20.43
							17.675	20.44
							17.666	20.45
							17.657	20.46
							17.647	20.47
							17.638	20.48
							17.629	20.49
							17.62	20.5
							17.611	20.51
							17.601	20.52
							17.592	20.53
							17.583	20.54
							17.574	20.55
							17.565	20.56
							17.555	20.57
							17.546	20.58
							17.537	20.59
							17.528	20.6
							17.518	20.61
							17.509	20.62
							17.5	20.63
							17.491	20.64
							17.482	20.65
							17.472	20.66
							17.463	20.67
							17.454	20.68
							17.445	20.69
							17.436	20.7
							17.426	20.71
							17.417	20.72
							17.408	20.73
							17.399	20.74
							17.39	20.75
							17.38	20.76
							17.371	20.77
							17.362	20.78
							17.353	20.79
							17.344	20.8
							17.334	20.81
							17.325	20.82
							17.316	20.83
							17.307	20.84
							17.298	20.85
							17.288	20.86
							17.279	20.87
							17.27	20.88
							17.261	20.89
							17.252	20.9
							17.242	20.91
							17.233	20.92
							17.224	20.93
							17.215	20.94
							17.206	20.95
							17.196	20.96
							17.187	20.97
							17.178	20.98
							17.169	20.99
							17.16	21
							17.15	21.01
							17.141	21.02
							17.132	21.03
							17.123	21.04
							17.113	21.05
							17.104	21.06
							17.095	21.07
							17.086	21.08
							17.077	21.09
							17.067	21.1
							17.058	21.11
							17.049	21.12
							17.04	21.13
							17.031	21.14
							17.021	21.15
							17.012	21.16
							17.003	21.17
							16.994	21.18
							16.985	21.19
							16.975	21.2
							16.966	21.21
							16.957	21.22
							16.948	21.23
							16.939	21.24
							16.929	21.25
							16.92	21.26
							16.911	21.27
							16.902	21.28
							16.893	21.29
							16.883	21.3
							16.874	21.31
							16.865	21.32
							16.856	21.33
							16.847	21.34
							16.837	21.35
							16.828	21.36
							16.819	21.37
							16.81	21.38
							16.801	21.39
							16.791	21.4
							16.782	21.41
							16.773	21.42
							16.764	21.43
							16.754	21.44
							16.745	21.45
							16.736	21.46
							16.727	21.47
							16.718	21.48
							16.708	21.49
							16.699	21.5
							16.69	21.51
							16.681	21.52
							16.672	21.53
							16.662	21.54
							16.653	21.55
							16.644	21.56
							16.635	21.57
							16.626	21.58
							16.616	21.59
							16.607	21.6
							16.598	21.61
							16.589	21.62
							16.58	21.63
							16.57	21.64
							16.561	21.65
							16.552	21.66
							16.543	21.67
							16.534	21.68
							16.524	21.69
							16.515	21.7
							16.506	21.71
							16.497	21.72
							16.488	21.73
							16.478	21.74
							16.469	21.75
							16.46	21.76
							16.451	21.77
							16.442	21.78
							16.432	21.79
							16.423	21.8
							16.414	21.81
							16.405	21.82
							16.395	21.83
							16.386	21.84
							16.377	21.85
							16.368	21.86
							16.359	21.87
							16.349	21.88
							16.34	21.89
							16.331	21.9
							16.322	21.91
							16.313	21.92
							16.303	21.93
							16.294	21.94
							16.285	21.95
							16.276	21.96
							16.267	21.97
							16.257	21.98
							16.248	21.99
							16.239	22
							16.23	22.01
							16.221	22.02
							16.211	22.03
							16.202	22.04
							16.193	22.05
							16.184	22.06
							16.175	22.07
							16.165	22.08
							16.156	22.09
							16.147	22.1
							16.138	22.11
							16.129	22.12
							16.119	22.13
							16.11	22.14
							16.101	22.15
							16.092	22.16
							16.083	22.17
							16.073	22.18
							16.064	22.19
							16.055	22.2
							16.046	22.21
							16.036	22.22
							16.027	22.23
							16.018	22.24
							16.009	22.25
							16	22.26
							15.99	22.27
							15.981	22.28
							15.972	22.29
							15.963	22.3
							15.954	22.31
							15.944	22.32
							15.935	22.33
							15.926	22.34
							15.917	22.35
							15.908	22.36
							15.898	22.37
							15.889	22.38
							15.88	22.39
							15.871	22.4
							15.862	22.41
							15.852	22.42
							15.843	22.43
							15.834	22.44
							15.825	22.45
							15.816	22.46
							15.806	22.47
							15.797	22.48
							15.788	22.49
							15.779	22.5
							15.77	22.51
							15.76	22.52
							15.751	22.53
							15.742	22.54
							15.733	22.55
							15.724	22.56
							15.714	22.57
							15.705	22.58
							15.696	22.59
							15.687	22.6
							15.677	22.61
							15.668	22.62
							15.659	22.63
							15.65	22.64
							15.641	22.65
							15.631	22.66
							15.622	22.67
							15.613	22.68
							15.604	22.69
							15.595	22.7
							15.585	22.71
							15.576	22.72
							15.567	22.73
							15.558	22.74
							15.549	22.75
							15.539	22.76
							15.53	22.77
							15.521	22.78
							15.512	22.79
							15.503	22.8
							15.493	22.81
							15.484	22.82
							15.475	22.83
							15.466	22.84
							15.457	22.85
							15.447	22.86
							15.438	22.87
							15.429	22.88
							15.42	22.89
							15.411	22.9
							15.401	22.91
							15.392	22.92
							15.383	22.93
							15.374	22.94
							15.365	22.95
							15.355	22.96
							15.346	22.97
							15.337	22.98
							15.328	22.99
							15.319	23
							15.309	23.01
							15.3	23.02
							15.291	23.03
							15.282	23.04
							15.272	23.05
							15.263	23.06
							15.254	23.07
							15.245	23.08
							15.236	23.09
							15.226	23.1
							15.217	23.11
							15.208	23.12
							15.199	23.13
							15.19	23.14
							15.18	23.15
							15.171	23.16
							15.162	23.17
							15.153	23.18
							15.144	23.19
							15.134	23.2
							15.125	23.21
							15.116	23.22
							15.107	23.23
							15.098	23.24
							15.088	23.25
							15.079	23.26
							15.07	23.27
							15.061	23.28
							15.052	23.29
							15.042	23.3
							15.033	23.31
							15.024	23.32
							15.015	23.33
							15.006	23.34
							14.996	23.35
							14.987	23.36
							14.978	23.37
							14.969	23.38
							14.96	23.39
							14.95	23.4
							14.941	23.41
							14.932	23.42
							14.923	23.43
							14.913	23.44
							14.904	23.45
							14.895	23.46
							14.886	23.47
							14.877	23.48
							14.867	23.49
							14.858	23.5
							14.849	23.51
							14.84	23.52
							14.831	23.53
							14.821	23.54
							14.812	23.55
							14.803	23.56
							14.794	23.57
							14.785	23.58
							14.775	23.59
							14.766	23.6
							14.757	23.61
							14.748	23.62
							14.739	23.63
							14.729	23.64
							14.72	23.65
							14.711	23.66
							14.702	23.67
							14.693	23.68
							14.683	23.69
							14.674	23.7
							14.665	23.71
							14.656	23.72
							14.647	23.73
							14.637	23.74
							14.628	23.75
							14.619	23.76
							14.61	23.77
							14.601	23.78
							14.591	23.79
							14.582	23.8
							14.573	23.81
							14.564	23.82
							14.554	23.83
							14.545	23.84
							14.536	23.85
							14.527	23.86
							14.518	23.87
							14.508	23.88
							14.499	23.89
							14.49	23.9
							14.481	23.91
							14.472	23.92
							14.462	23.93
							14.453	23.94
							14.444	23.95
							14.435	23.96
							14.426	23.97
							14.416	23.98
							14.407	23.99
							14.398	24
							14.389	24.01
							14.38	24.02
							14.37	24.03
							14.361	24.04
							14.352	24.05
							14.343	24.06
							14.334	24.07
							14.324	24.08
							14.315	24.09
							14.306	24.1
							14.297	24.11
							14.288	24.12
							14.278	24.13
							14.269	24.14
							14.26	24.15
							14.251	24.16
							14.242	24.17
							14.232	24.18
							14.223	24.19
							14.214	24.2
							14.205	24.21
							14.195	24.22
							14.186	24.23
							14.177	24.24
							14.168	24.25
							14.159	24.26
							14.149	24.27
							14.14	24.28
							14.131	24.29
							14.122	24.3
							14.113	24.31
							14.103	24.32
							14.094	24.33
							14.085	24.34
							14.076	24.35
							14.067	24.36
							14.057	24.37
							14.048	24.38
							14.039	24.39
							14.03	24.4
							14.021	24.41
							14.011	24.42
							14.002	24.43
							13.993	24.44
							13.984	24.45
							13.975	24.46
							13.965	24.47
							13.956	24.48
							13.947	24.49
							13.938	24.5
							13.929	24.51
							13.919	24.52
							13.91	24.53
							13.901	24.54
							13.892	24.55
							13.883	24.56
							13.873	24.57
							13.864	24.58
							13.855	24.59
							13.846	24.6
							13.836	24.61
							13.827	24.62
							13.818	24.63
							13.809	24.64
							13.8	24.65
							13.79	24.66
							13.781	24.67
							13.772	24.68
							13.763	24.69
							13.754	24.7
							13.744	24.71
							13.735	24.72
							13.726	24.73
							13.717	24.74
							13.708	24.75
							13.698	24.76
							13.689	24.77
							13.68	24.78
							13.671	24.79
							13.662	24.8
							13.652	24.81
							13.643	24.82
							13.634	24.83
							13.625	24.84
							13.616	24.85
							13.606	24.86
							13.597	24.87
							13.588	24.88
							13.579	24.89
							13.57	24.9
							13.56	24.91
							13.551	24.92
							13.542	24.93
							13.533	24.94
							13.524	24.95
							13.514	24.96
							13.505	24.97
							13.496	24.98
							13.487	24.99
							13.478	25
							13.468	25.01
							13.459	25.02
							13.45	25.03
							13.441	25.04
							13.431	25.05
							13.422	25.06
							13.413	25.07
							13.404	25.08
							13.395	25.09
							13.385	25.1
							13.376	25.11
							13.367	25.12
							13.358	25.13
							13.349	25.14
							13.339	25.15
							13.33	25.16
							13.321	25.17
							13.312	25.18
							13.303	25.19
							13.293	25.2
							13.284	25.21
							13.275	25.22
							13.266	25.23
							13.257	25.24
							13.247	25.25
							13.238	25.26
							13.229	25.27
							13.22	25.28
							13.211	25.29
							13.201	25.3
							13.192	25.31
							13.183	25.32
							13.174	25.33
							13.165	25.34
							13.155	25.35
							13.146	25.36
							13.137	25.37
							13.128	25.38
							13.119	25.39
							13.109	25.4
							13.1	25.41
							13.091	25.42
							13.082	25.43
							13.072	25.44
							13.063	25.45
							13.054	25.46
							13.045	25.47
							13.036	25.48
							13.026	25.49
							13.017	25.5
							13.008	25.51
							12.999	25.52
							12.99	25.53
							12.98	25.54
							12.971	25.55
							12.962	25.56
							12.953	25.57
							12.944	25.58
							12.934	25.59
							12.925	25.6
							12.916	25.61
							12.907	25.62
							12.898	25.63
							12.888	25.64
							12.879	25.65
							12.87	25.66
							12.861	25.67
							12.852	25.68
							12.842	25.69
							12.833	25.7
							12.824	25.71
							12.815	25.72
							12.806	25.73
							12.796	25.74
							12.787	25.75
							12.778	25.76
							12.769	25.77
							12.76	25.78
							12.75	25.79
							12.741	25.8
							12.732	25.81
							12.723	25.82
							12.713	25.83
							12.704	25.84
							12.695	25.85
							12.686	25.86
							12.677	25.87
							12.667	25.88
							12.658	25.89
							12.649	25.9
							12.64	25.91
							12.631	25.92
							12.621	25.93
							12.612	25.94
							12.603	25.95
							12.594	25.96
							12.585	25.97
							12.575	25.98
							12.566	25.99
							12.557	26
							12.548	26.01
							12.539	26.02
							12.529	26.03
							12.52	26.04
							12.511	26.05
							12.502	26.06
							12.493	26.07
							12.483	26.08
							12.474	26.09
							12.465	26.1
							12.456	26.11
							12.447	26.12
							12.437	26.13
							12.428	26.14
							12.419	26.15
							12.41	26.16
							12.401	26.17
							12.391	26.18
							12.382	26.19
							12.373	26.2
							12.364	26.21
							12.354	26.22
							12.345	26.23
							12.336	26.24
							12.327	26.25
							12.318	26.26
							12.308	26.27
							12.299	26.28
							12.29	26.29
							12.281	26.3
							12.272	26.31
							12.262	26.32
							12.253	26.33
							12.244	26.34
							12.235	26.35
							12.226	26.36
							12.216	26.37
							12.207	26.38
							12.198	26.39
							12.189	26.4
							12.18	26.41
							12.17	26.42
							12.161	26.43
							12.152	26.44
							12.143	26.45
							12.134	26.46
							12.124	26.47
							12.115	26.48
							12.106	26.49
							12.097	26.5
							12.088	26.51
							12.078	26.52
							12.069	26.53
							12.06	26.54
							12.051	26.55
							12.042	26.56
							12.032	26.57
							12.023	26.58
							12.014	26.59
							12.005	26.6
							11.995	26.61
							11.986	26.62
							11.977	26.63
							11.968	26.64
							11.959	26.65
							11.949	26.66
							11.94	26.67
							11.931	26.68
							11.922	26.69
							11.913	26.7
							11.903	26.71
							11.894	26.72
							11.885	26.73
							11.876	26.74
							11.867	26.75
							11.857	26.76
							11.848	26.77
							11.839	26.78
							11.83	26.79
							11.821	26.8
							11.811	26.81
							11.802	26.82
							11.793	26.83
							11.784	26.84
							11.775	26.85
							11.765	26.86
							11.756	26.87
							11.747	26.88
							11.738	26.89
							11.729	26.9
							11.719	26.91
							11.71	26.92
							11.701	26.93
							11.692	26.94
							11.683	26.95
							11.673	26.96
							11.664	26.97
							11.655	26.98
							11.646	26.99
							11.637	27
							11.627	27.01
							11.618	27.02
							11.609	27.03
							11.6	27.04
							11.59	27.05
							11.581	27.06
							11.572	27.07
							11.563	27.08
							11.554	27.09
							11.544	27.1
							11.535	27.11
							11.526	27.12
							11.517	27.13
							11.508	27.14
							11.498	27.15
							11.489	27.16
							11.48	27.17
							11.471	27.18
							11.462	27.19
							11.452	27.2
							11.443	27.21
							11.434	27.22
							11.425	27.23
							11.416	27.24
							11.406	27.25
							11.397	27.26
							11.388	27.27
							11.379	27.28
							11.37	27.29
							11.36	27.3
							11.351	27.31
							11.342	27.32
							11.333	27.33
							11.324	27.34
							11.314	27.35
							11.305	27.36
							11.296	27.37
							11.287	27.38
							11.278	27.39
							11.268	27.4
							11.259	27.41
							11.25	27.42
							11.241	27.43
							11.231	27.44
							11.222	27.45
							11.213	27.46
							11.204	27.47
							11.195	27.48
							11.185	27.49
							11.176	27.5
							11.167	27.51
							11.158	27.52
							11.149	27.53
							11.139	27.54
							11.13	27.55
							11.121	27.56
							11.112	27.57
							11.103	27.58
							11.093	27.59
							11.084	27.6
							11.075	27.61
							11.066	27.62
							11.057	27.63
							11.047	27.64
							11.038	27.65
							11.029	27.66
							11.02	27.67
							11.011	27.68
							11.001	27.69
							10.992	27.7
							10.983	27.71
							10.974	27.72
							10.965	27.73
							10.955	27.74
							10.946	27.75
							10.937	27.76
							10.928	27.77
							10.919	27.78
							10.909	27.79
							10.9	27.8
							10.891	27.81
							10.882	27.82
							10.872	27.83
							10.863	27.84
							10.854	27.85
							10.845	27.86
							10.836	27.87
							10.826	27.88
							10.817	27.89
							10.808	27.9
							10.799	27.91
							10.79	27.92
							10.78	27.93
							10.771	27.94
							10.762	27.95
							10.753	27.96
							10.744	27.97
							10.734	27.98
							10.725	27.99
							10.716	28
							10.707	28.01
							10.698	28.02
							10.688	28.03
							10.679	28.04
							10.67	28.05
							10.661	28.06
							10.652	28.07
							10.642	28.08
							10.633	28.09
							10.624	28.1
							10.615	28.11
							10.606	28.12
							10.596	28.13
							10.587	28.14
							10.578	28.15
							10.569	28.16
							10.56	28.17
							10.55	28.18
							10.541	28.19
							10.532	28.2
							10.523	28.21
							10.513	28.22
							10.504	28.23
							10.495	28.24
							10.486	28.25
							10.477	28.26
							10.467	28.27
							10.458	28.28
							10.449	28.29
							10.44	28.3
							10.431	28.31
							10.421	28.32
							10.412	28.33
							10.403	28.34
							10.394	28.35
							10.385	28.36
							10.375	28.37
							10.366	28.38
							10.357	28.39
							10.348	28.4
							10.339	28.41
							10.329	28.42
							10.32	28.43
							10.311	28.44
							10.302	28.45
							10.293	28.46
							10.283	28.47
							10.274	28.48
							10.265	28.49
							10.256	28.5
							10.247	28.51
							10.237	28.52
							10.228	28.53
							10.219	28.54
							10.21	28.55
							10.201	28.56
							10.191	28.57
							10.182	28.58
							10.173	28.59
							10.164	28.6
							10.154	28.61
							10.145	28.62
							10.136	28.63
							10.127	28.64
							10.118	28.65
							10.108	28.66
							10.099	28.67
							10.09	28.68
							10.081	28.69
							10.072	28.7
							10.062	28.71
							10.053	28.72
							10.044	28.73
							10.035	28.74
							10.026	28.75
							10.016	28.76
							10.007	28.77
							9.998	28.78
							9.9888	28.79
							9.9796	28.8
							9.9704	28.81
							9.9612	28.82
							9.952	28.83
							9.9428	28.84
							9.9336	28.85
							9.9244	28.86
							9.9152	28.87
							9.906	28.88
							9.8968	28.89
							9.8876	28.9
							9.8783	28.91
							9.8691	28.92
							9.8599	28.93
							9.8507	28.94
							9.8415	28.95
							9.8323	28.96
							9.8231	28.97
							9.8139	28.98
[truncated: 302 more rows]
