# Supplementary material for: Quantitative control of noise in mammalian gene expression by dynamic histone regulation
Source: eLife. 2021 Aug 11;10:e65654. doi: 10.7554/eLife.65654 (PMC8357418; doi:10.7554/eLife.65654)
Supplement: Figure 1—source data 1. [file elife-65654-fig1-data1.xlsx]

## Sheet: Fig1C
	AM				PWM 100min		PWM 200min		PWM 400min
mean light power (uW/cm2)	log10(mR)	log10(mR)	log10(mR)	log10(mR)	log10(mR)	log10(mR)	log10(mR)	log10(mR)	log10(mR)	log10(mR)	log10(mR)
0	2.4464	2.3879	2.3171	2.3171	2.4493	2.3851	2.4493	2.3851	2.3171	2.4876	2.3388
1	2.3937	2.3205					2.4598	2.4137	2.4186	2.4652	2.4541
4	2.445	2.4294			2.4649	2.6458	2.5779	2.5342	2.761	2.5694	0
7	2.7925	2.6141	2.8802		2.6869	2.8323	2.8008	2.6573	2.9061	2.9453	0
10	2.8486	2.6821	2.8673	2.9511	2.6819	3.2004	3.1274	2.827	3.0832	3.064	0
15	3.0643	3.024	3.2828	3.2954	2.9196	3.4505	3.3809	3.1299	3.3216	3.3163	0
20	3.4224	3.4369	3.6108	3.607	3.3627	3.6121	3.4267	3.4024	3.4494	4.0378	3.4875
25	3.6716	3.7823	3.8732	3.8346	3.6713	3.7472	3.5528	3.5471	3.5301	4.3603	3.6373
35	3.7614	3.7894	3.9496	3.9626	3.5626	3.9254	3.7343	3.6649	3.7059	4.3754	3.7736
45	4.1543	3.8469	3.9622	4.0001	3.7376	4.2118	3.8748	3.7973	3.8626	4.4167	3.9036
60	4.4056	3.9763	4.092	4.0891	4.0135	4.4606	4.0944	3.9826	4.0304	4.5204	4.0713
80	4.5084	4.1333	4.2229	4.2219	4.1798	4.4898	4.3304	4.4182	4.3881	4.6184	4.3308
100	4.5215	4.2409	4.3881	4.3881	4.344	4.5215	4.3553	4.4898	4.4898	4.6877	4.5145

## Sheet: Fig1D
	AM				PWM 100min		PWM 200min		PWM 400min
mean light power (uW/cm2)	CV_R	CV_R	CV_R	CV_R	CV_R	CV_R	CV_R	CV_R	CV_R	CV_R	CV_R
0	0.46012	0.39147	0.4367	0.4367	0.4168	0.46961	0.4168	0.46961	0.4367	0.43774	0.44186
1	0.40004	0.49558					0.39121	0.47332	0.68095	0.45442	0.7057
4	0.57142	1.2759			0.40632	1.8283	0.76574	1.3113	1.0494	0.74128	0
7	2.5397	2.14	2.4569		1.5325	1.9424	1.1777	1.3533	1.0623	0.92196	0
10	2.5258	1.7653	2.5578	2.5911	1.5317	1.9751	1.1548	1.5057	1.0281	0.97412	0
15	2.7065	2.0764	2.0637	2.2774	1.6099	1.7432	1.0038	1.4124	0.97805	0.91221	0
20	2.3079	1.8415	1.6995	1.7833	1.5475	1.6631	1.1131	1.3376	0.93027	1.2468	0.90079
25	1.8387	1.4651	1.4714	1.5013	1.3591	1.5967	1.0417	1.1837	0.94793	0.95753	0.87165
35	1.7498	1.42	1.3773	1.3373	1.4642	1.4224	1.0098	1.212	0.94245	0.89379	0.91993
45	1.257	1.3886	1.3139	1.2988	1.3891	1.1213	1.0274	1.2663	1.0039	0.83305	0.95689
60	0.95384	1.2347	1.1965	1.193	1.1367	0.88423	1.0236	1.2634	1.0514	0.72986	0.97904
80	0.85	1.0768	1.0748	1.0722	1.0021	0.84973	0.8556	0.9128	0.8556	0.64318	0.91393
100	0.039535	0.98847	0.95883	0.95883	0.87292	0.81875	0.84581	0.84973	0.84581	0.58983	0.82034

## Sheet: Fig1E
AM				AM					PWM 100min		PWM 100min
log10(mR)	log10(mR)	log10(mR)	log10(mR)	CV_R	CV_R	CV_R	CV_R		log10(mR)	log10(mR)	CV_R	CV_R
2.4464	2.3879	2.3171	2.3171	0.46012	0.39147	0.4367	0.4367		2.4493	2.3851	0.4168	0.46961
2.3937	2.3205	0	0	0.40004	0.49558	0	0		2.4649	2.6458	0.40632	1.8283
2.445	2.4294	0	0	0.57142	1.2759	0	0		2.6869	2.8323	1.5325	1.9424
2.7925	2.6141	2.8802	0	2.5397	2.14	2.4569	0		2.6819	3.2004	1.5317	1.9751
2.8486	2.6821	2.8673	2.9511	2.5258	1.7653	2.5578	2.5911		2.9196	3.4505	1.6099	1.7432
3.0643	3.024	3.2828	3.2954	2.7065	2.0764	2.0637	2.2774		3.3627	3.6121	1.5475	1.6631
3.4224	3.4369	3.6108	3.607	2.3079	1.8415	1.6995	1.7833		3.6713	3.7472	1.3591	1.5967
3.6716	3.7823	3.8732	3.8346	1.8387	1.4651	1.4714	1.5013		3.5626	3.9254	1.4642	1.4224
3.7614	3.7894	3.9496	3.9626	1.7498	1.42	1.3773	1.3373		3.7376	4.2118	1.3891	1.1213
4.1543	3.8469	3.9622	4.0001	1.257	1.3886	1.3139	1.2988		4.0135	4.4606	1.1367	0.88423
4.4056	3.9763	4.092	4.0891	0.95384	1.2347	1.1965	1.193		4.1798	4.4898	1.0021	0.84973
4.5084	4.1333	4.2229	4.2219	0.85	1.0768	1.0748	1.0722		4.344	4.5215	0.87292	0.81875
4.5215	4.2409	4.3881	4.3881	0.039535	0.98847	0.95883	0.95883
PWM 200min		PWM 200min							PWM 400min			PWM 400min
log10(mR)	log10(mR)	CV_R	CV_R						log10(mR)	log10(mR)	log10(mR)	CV_R	CV_R	CV_R
2.4493	2.3851	0.4168	0.46961						2.3171	2.4876	2.3388	0.4367	0.43774	0.44186
2.4598	2.4137	0.39121	0.47332						2.4186	2.4652	2.4541	0.68095	0.45442	0.7057
2.5779	2.5342	0.76574	1.3113						2.761	2.5694	0	1.0494	0.74128	0
2.8008	2.6573	1.1777	1.3533						2.9061	2.9453	0	1.0623	0.92196	0
3.1274	2.827	1.1548	1.5057						3.0832	3.064	0	1.0281	0.97412	0
3.3809	3.1299	1.0038	1.4124						3.3216	3.3163	0	0.97805	0.91221	0
3.4267	3.4024	1.1131	1.3376						3.4494	4.0378	3.4875	0.93027	1.2468	0.90079
3.5528	3.5471	1.0417	1.1837						3.5301	4.3603	3.6373	0.94793	0.95753	0.87165
3.7343	3.6649	1.0098	1.212						3.7059	4.3754	3.7736	0.94245	0.89379	0.91993
3.8748	3.7973	1.0274	1.2663						3.8626	4.4167	3.9036	1.0039	0.83305	0.95689
4.0944	3.9826	1.0236	1.2634						4.0304	4.5204	4.0713	1.0514	0.72986	0.97904
4.3304	4.4182	0.8556	0.9128						4.3881	4.6184	4.3308	0.8556	0.64318	0.91393
4.3553	4.4898	0.84581	0.84973						4.4898	4.6877	4.5145	0.84581	0.58983	0.82034

## Sheet: Fig1F
log10(mR)	AM	AM	AM	AM	AM	AM	AM	PWM400m	PWM400m	PWM400m	PWM400m	PWM400m	PWM400m	PWM400m
1	0.0017257	0.15127	0.30081	0.45024	0.60054	0.75009	0.9	0.0037198	0.15073	0.30042	0.45015	0.6001	0.75005	0.90003
1.1	0.00047937	0.15036	0.30024	0.45002	0.60012	0.75002	0.9	0.00090339	0.15028	0.30009	0.4501	0.6	0.75	0.9
1.2	0.0006072	0.15047	0.30018	0.45014	0.60014	0.75002	0.9	0.0017005	0.15023	0.30009	0.4501	0.60005	0.75	0.9
1.3	0.00084689	0.1507	0.30018	0.45015	0.60019	0.75005	0.9	0.0015942	0.15055	0.30009	0.45015	0.6001	0.75	0.9
1.4	0.0011505	0.15098	0.30034	0.45027	0.60022	0.75007	0.90002	0.002285	0.15073	0.30037	0.4501	0.60015	0.75	0.90003
1.5	0.0016299	0.15124	0.30081	0.45034	0.60039	0.75004	0.9	0.0032416	0.1506	0.30009	0.4503	0.6002	0.75	0.90003
1.6	0.0024128	0.15211	0.30119	0.45056	0.60062	0.75014	0.9	0.0054203	0.15133	0.30033	0.45025	0.6002	0.75016	0.9
1.7	0.0041705	0.15354	0.30205	0.45079	0.60096	0.75014	0.90002	0.010044	0.15202	0.30056	0.4504	0.6002	0.75016	0.90003
1.8	0.0066952	0.15565	0.30294	0.45103	0.60174	0.75027	0.90002	0.015836	0.15381	0.30088	0.4509	0.60035	0.75016	0.90005
1.9	0.012591	0.16016	0.30576	0.45196	0.60286	0.75065	0.90002	0.027155	0.15803	0.30186	0.4512	0.601	0.75016	0.90015
2	0.023489	0.16977	0.31112	0.45429	0.60546	0.75097	0.90009	0.053194	0.16313	0.30405	0.45229	0.60184	0.75037	0.90023
2.1	0.047825	0.1888	0.32052	0.45853	0.60992	0.75171	0.90023	0.094112	0.17878	0.30916	0.45528	0.60413	0.75094	0.90053
2.2	0.089866	0.22523	0.34368	0.46608	0.61862	0.75429	0.90037	0.15847	0.20058	0.31809	0.45982	0.60582	0.7523	0.90091
2.3	0.15123	0.27794	0.37834	0.48046	0.63273	0.7579	0.90114	0.22367	0.23748	0.33027	0.46609	0.61209	0.75413	0.90134
2.4	0.20992	0.33399	0.42018	0.49851	0.64967	0.76212	0.90189	0.22282	0.27361	0.34999	0.47217	0.61747	0.75696	0.90202
2.5	0.21696	0.34307	0.44644	0.5124	0.66159	0.76784	0.903	0.12918	0.28802	0.36942	0.48064	0.61981	0.75784	0.90233
2.6	0.14496	0.29475	0.4377	0.52003	0.65922	0.77122	0.90387	0.038368	0.27402	0.38119	0.49156	0.62687	0.76056	0.90329
2.7	0.061551	0.23029	0.39865	0.51493	0.65316	0.77145	0.90382	0.0053141	0.25075	0.38263	0.49684	0.63354	0.76349	0.90352
2.8	0.016123	0.18989	0.36605	0.50745	0.64752	0.77246	0.90417	0.0017005	0.23152	0.39267	0.50601	0.63961	0.76605	0.90478
2.9	0.0037231	0.17095	0.34816	0.50034	0.64266	0.77338	0.90501	0.00058455	0.2183	0.39221	0.51846	0.64494	0.76846	0.90561
3	0.0010866	0.16316	0.33553	0.49762	0.6419	0.77452	0.90589	0.00037198	0.20191	0.39077	0.52414	0.66126	0.77212	0.90627
3.1	0.00046339	0.15978	0.33176	0.4988	0.64212	0.77782	0.90738	0.00015942	0.19223	0.3863	0.53919	0.67067	0.78216	0.90898
3.2	0.00028762	0.15715	0.32686	0.49731	0.64211	0.78269	0.90922	5.3141e-05	0.17855	0.38174	0.54577	0.6854	0.79231	0.91007
3.3	9.5874e-05	0.1555	0.32302	0.49593	0.64334	0.78486	0.91229	0.00010628	0.16841	0.37012	0.54831	0.70013	0.80005	0.91386
3.4	4.7937e-05	0.15387	0.31952	0.4961	0.64425	0.78879	0.91399	0	0.1623	0.35343	0.54263	0.70122	0.81302	0.9154
3.5	3.1958e-05	0.15269	0.31482	0.49334	0.64322	0.7918	0.91705	0	0.15601	0.33608	0.53137	0.70068	0.82222	0.91786
3.6	3.1958e-05	0.15207	0.31333	0.49103	0.64228	0.79597	0.92014	0	0.15344	0.32339	0.51687	0.68913	0.82944	0.92403
3.7	0	0.15145	0.31114	0.48807	0.64081	0.80117	0.92547	0	0.15165	0.31251	0.49519	0.66977	0.83712	0.92653
3.8	0	0.15113	0.30925	0.48638	0.6398	0.8016	0.93027	0	0.15046	0.30563	0.47676	0.65181	0.84643	0.93199
3.9	0	0.15073	0.30714	0.485	0.63812	0.80611	0.93861	0	0.15041	0.30316	0.46465	0.6312	0.83984	0.93895
4	0	0.15036	0.3056	0.48083	0.63597	0.80826	0.94669	0	0.15009	0.30112	0.45742	0.61543	0.83524	0.94719
4.1	0	0.15034	0.30533	0.47867	0.63279	0.80914	0.95412	0	0.15005	0.3006	0.45284	0.60786	0.81778	0.95529
4.2	0	0.15011	0.30437	0.4747	0.63104	0.80939	0.96376	0	0.15	0.30056	0.4513	0.60448	0.80282	0.96434
4.3	0	0.15026	0.30287	0.47149	0.62808	0.80954	0.97368	0	0.15	0.30009	0.4505	0.60174	0.78718	0.97595
4.4	0	0.1501	0.30185	0.4678	0.62429	0.81176	0.9889	0	0.15	0.30005	0.45015	0.6005	0.76966	0.99216
4.5	0	0.15008	0.30107	0.46274	0.61829	0.80584	1.0017	0	0.15	0.3	0.45005	0.6001	0.76192	0.99818
4.6	0	0.15002	0.30067	0.45758	0.6114	0.7922	1.0059	0	0.15	0.3	0.45	0.60015	0.75518	0.99879
4.7	0	0.15002	0.30026	0.45453	0.60638	0.77984	0.9944	0	0.15	0.3	0.45	0.6	0.75256	0.99363
4.8	0	0.15	0.30011	0.45199	0.60309	0.76754	0.97773	0	0.15	0.3	0.45	0.6	0.75073	0.97355
4.9	0	0.15	0.30008	0.45101	0.6014	0.75947	0.94971	0	0.15	0.3	0.45005	0.6	0.75031	0.94724
5	0	0.15	0.30005	0.45041	0.60058	0.75411	0.9245	0	0.15	0.3	0.45	0.6	0.75005	0.92347
5.1	0	0.15	0.30002	0.45014	0.60041	0.75166	0.90999	0	0.15	0.3	0.45	0.6	0.75	0.90852
5.2	0	0.15	0.3	0.45003	0.60002	0.75078	0.9034	0	0.15	0.3	0.45	0.6	0.75005	0.9023
5.3	0	0.15	0.3	0.45	0.60001	0.75018	0.90133	0	0.15	0.3	0.45	0.6	0.75	0.90048
5.4	0	0.15	0.3	0.45	0.6	0.75009	0.90021	0	0.15	0.3	0.45	0.6	0.75	0.90013
5.5	0	0.15	0.3	0.45	0.6	0.75002	0.90002	0	0.15	0.3	0.45	0.6	0.75	0.9
5.6	0	0.15	0.3	0.45	0.6	0.75	0.9	0	0.15	0.3	0.45	0.6	0.75	0.9
5.7	0	0.15	0.3	0.45	0.6	0.75	0.9	0	0.15	0.3	0.45	0.6	0.75	0.9
5.8	0	0.15	0.3	0.45	0.6	0.75	0.9	0	0.15	0.3	0.45	0.6	0.75	0.9
5.9	0	0.15	0.3	0.45	0.6	0.75	0.9	0	0.15	0.3	0.45	0.6	0.75	0.9
6	0	0.15	0.3	0.45	0.6	0.75	0.9	0	0.15	0.3	0.45	0.6	0.75	0.9
6.1	0	0.15	0.3	0.45	0.6	0.75	0.9	0	0.15	0.3	0.45	0.6	0.75	0.9
6.2	0	0.15	0.3	0.45	0.6	0.75	0.9	0	0.15	0.3	0.45	0.6	0.75	0.9
6.3	0	0.15	0.3	0.45	0.6	0.75	0.9	0	0.15	0.3	0.45	0.6	0.75	0.9
6.4	0	0.15	0.3	0.45	0.6	0.75	0.9	0	0.15	0.3	0.45	0.6	0.75	0.9
6.5	0	0.15	0.3	0.45	0.6	0.75	0.9	0	0.15	0.3	0.45	0.6	0.75	0.9
6.6	0	0.15	0.3	0.45	0.6	0.75	0.9	0	0.15	0.3	0.45	0.6	0.75	0.9
6.7	0	0.15	0.3	0.45	0.6	0.75	0.9	0	0.15	0.3	0.45	0.6	0.75	0.9
6.8	0	0.15	0.3	0.45	0.6	0.75	0.9	0	0.15	0.3	0.45	0.6	0.75	0.9
6.9	0	0.15	0.3	0.45	0.6	0.75	0.9	0	0.15	0.3	0.45	0.6	0.75	0.9
7	0	0.15	0.3	0.45	0.6	0.75	0.9	0	0.15	0.3	0.45	0.6	0.75	0.9
7.1	0	0.15	0.3	0.45	0.6	0.75	0.9	0	0.15	0.3	0.45	0.6	0.75	0.9
7.2	0	0.15	0.3	0.45	0.6	0.75	0.9	0	0.15	0.3	0.45	0.6	0.75	0.9
7.3	0	0.15	0.3	0.45	0.6	0.75	0.9	0	0.15	0.3	0.45	0.6	0.75	0.9
7.4	0	0.15	0.3	0.45	0.6	0.75	0.9	0	0.15	0.3	0.45	0.6	0.75	0.9
7.5	0	0.15	0.3	0.45	0.6	0.75	0.9	0	0.15	0.3	0.45	0.6	0.75	0.9
7.6	0	0.15	0.3	0.45	0.6	0.75	0.9	0	0.15	0.3	0.45	0.6	0.75	0.9
7.7	0	0.15	0.3	0.45	0.6	0.75	0.9	0	0.15	0.3	0.45	0.6	0.75	0.9
7.8	0	0.15	0.3	0.45	0.6	0.75	0.9	0	0.15	0.3	0.45	0.6	0.75	0.9
7.9	0	0.15	0.3	0.45	0.6	0.75	0.9	0	0.15	0.3	0.45	0.6	0.75	0.9
8	0	0.15	0.3	0.45	0.6	0.75	0.9	0	0.15	0.3	0.45	0.6	0.75	0.9

## Sheet: Fig1G
GFP	mRuby
284000	1210.3
595000	3980.7
862000	22051
362000	2378.5
873000	15414
1080000	73282
268000	3104.7
571000	11885
407000	23366
409000	6143.7
517000	4987.6
1060000	115000
648000	1580.3
523000	35049
476000	30164
809000	56510
98282	281
426000	14149
209000	9602.6
805000	23838
552000	1477.9
365000	558.2
877000	119000
512000	82238
162000	400.2
367000	3983.9
473000	1117.9
469000	20294
822000	11875
618000	1470.8
510000	1851.2
951000	85304
854000	10379
1040000	1272.8
436000	10981
555000	1329.1
687000	85075
761000	1254.9
624000	23862
167000	926
221000	431
285000	1227.4
673000	109000
272000	2185.8
187000	225.5
711000	4831.3
162000	1457
449000	1355.5
453000	1255.5
395000	13466
387000	264.7
69655	413.2
452000	851.1
514000	2044.7
229000	42093
465000	4104.6
351000	2028.9
276000	1238.1
552000	42526
694000	48057
421000	1464
280000	896.9
615000	9885.5
115000	359.2
611000	896.2
733000	11667
443000	1287.4
423000	869.9
514000	4311.9
705000	49209
457000	13981
303000	889.8
57975	502.4
669000	13488
519000	847
805000	40458
251000	1073.5
587000	9230.3
813000	31951
247000	937.2
535000	2800.5
489000	11651
583000	6511.5
410000	840.2
228000	823.7
182000	1021
504000	3481.7
265000	1165.1
188000	1067.7
428000	41364
346000	1508.7
235000	597.2
140000	787.3
772000	11330
330000	1012.8
260000	818.6
653000	29210
626000	44669
501000	76885
244000	810.9
251000	567.1
837000	80647
200000	1652.5
533000	5854.9
687000	16072
398000	7703.3
702000	4739.4
264000	898.4
712000	1945.6
639000	7205.9
883000	92882
504000	3254.7
618000	172000
318000	2695.8
83471	444.8
199000	597.5
336000	19197
407000	835.3
504000	1581.4
217000	716.3
451000	827
345000	679.3
441000	4208.7
256000	1308.7
273000	1030.1
640000	18191
664000	54455
171000	4166.1
766000	1051.7
515000	30395
615000	1947
332000	12362
481000	45707
199000	3227.4
223000	509.4
601000	8165
118000	1168
216000	635.3
251000	2272.2
482000	5309
730000	6231
329000	3644.7
295000	3011
410000	1893.3
489000	21744
637000	93230
204000	410.2
1080000	42295
359000	4659.5
580000	19287
197000	1038.7
1370000	66053
343000	1559.6
385000	1161.2
388000	1153.1
1030000	31703
435000	614.3
693000	7322.1
909000	8879.3
417000	3122.2
306000	1020.9
521000	56718
146000	1211.8
929000	67314
593000	7865
654000	2229.5
247000	6552.3
385000	7641
511000	23765
388000	4446.2
691000	90124
335000	6305
313000	1662.3
149000	3201.9
137000	1431
402000	6015.8
410000	43100
608000	5386
264000	952.9
1570000	94789
438000	1877.5
614000	20514
615000	45670
276000	2853.5
195000	1155.6
306000	15882
379000	7432.3
339000	4188.6
275000	881.2
399000	1109.4
649000	8229.5
385000	7693.7
440000	6970.3
411000	1239.1
158000	954.8
768000	9690.6
314000	2959.7
833000	16116
422000	107000
290000	14619
420000	32019
393000	877.5
258000	784.3
500000	16337
669000	11066
479000	1079.2
399000	4148.5
183000	1536.5
557000	14120
952000	20871
624000	9775.5
464000	12171
795000	141000
406000	2791.2
693000	34811
798000	47745
605000	1370.4
415000	7240.7
736000	2998.5
939000	8286
454000	1184.2
532000	1379
813000	7389.7
509000	2423.2
346000	2941.7
102000	529.2
587000	49146
184000	355.8
555000	43969
87786	1027.1
515000	7477
513000	1724.9
978000	78797
414000	4758
592000	809.9
368000	1411.2
541000	14420
791000	129000
285000	1601.2
923000	27326
664000	6432.9
416000	3461.4
38740	1187.8
254000	1350.8
293000	20883
168000	2176.9
685000	29112
1080000	1877
885000	2597.5
509000	15678
349000	1898.7
864000	138000
535000	12755
791000	3713
528000	40695
901000	110000
397000	1870.7
472000	1092.2
1070000	21332
702000	99542
1520000	136000
444000	2252.2
850000	4470.3
537000	16499
551000	4329.8
217000	913.2
601000	15143
509000	28873
755000	10408
769000	32827
294000	1011.3
812000	9559.6
884000	24157
415000	32067
226000	712.7
549000	61108
336000	1879.3
558000	75870
248000	1120.7
349000	25291
199000	330
476000	1332.4
460000	15788
546000	1835.7
842000	16869
529000	1910.4
523000	9379.8
374000	515.3
484000	8388.1
739000	3884.5
336000	5842.8
345000	615.4
413000	72761
775000	2468.4
247000	1028.3
260000	10896
188000	930.4
548000	1397
760000	13913
668000	108000
320000	2604.9
712000	33768
288000	3489
528000	1108.3
206000	2095.8
1290000	6670
675000	9822.5
262000	599.3
117000	1540.9
365000	2321.2
504000	3576.5
755000	43582
373000	2877
70993	1062.2
488000	30870
782000	19619
348000	3213.7
369000	1137.7
657000	38738
87270	714.8
263000	4820.5
1040000	6460
524000	30170
231000	4827.2
781000	4250
513000	1176.7
115000	641.7
610000	74015
350000	1606
330000	1130.5
578000	25430
323000	601.8
268000	1021.2
642000	1459.3
344000	618
168000	967.6
755000	55137
522000	25139
476000	725.6
321000	21058
562000	16719
350000	432.3
415000	1190.8
436000	9512.2
509000	20225
435000	2763.7
347000	3304.7
790000	22443
182000	1063.1
400000	2046.2
219000	19246
510000	8258.4
410000	7378.3
393000	5160
532000	1152
819000	1876.2
314000	4498.5
444000	1985.4
314000	13421
474000	2119.4
981000	9171
406000	5439
397000	67363
611000	3736.3
685000	12919
178000	6456.5
430000	28361
229000	486.7
502000	3219.1
963000	102000
295000	3667.9
255000	1170.4
377000	3322.1
255000	314.6
272000	1184
339000	4712.3
696000	6006.7
764000	17422
659000	11219
304000	615.9
350000	8723.1
219000	901.9
176000	900.7
653000	7461.8
705000	37825
366000	1211.5
372000	37161
215000	615.2
528000	1409.7
360000	13815
503000	1233.8
645000	17781
363000	4428.3
414000	45150
700000	7524.2
285000	2605.7
501000	46885
724000	2598.9
845000	6875.7
733000	4904.5
362000	24904
680000	45485
526000	1628.3
533000	33900
2000000	122000
250000	742.6
140000	538
605000	41060
436000	8178.7
348000	1467.9
560000	794.8
707000	3651.5
442000	28325
856000	20962
394000	4525.7
790000	77460
232000	596.5
266000	5264.5
555000	2595.1
568000	1154.2
342000	1045.5
389000	15742
731000	26860
358000	7206
1330000	28523
429000	4431.1
677000	66010
617000	22209
294000	2462
261000	1797.7
119000	293.5
745000	8394.1
788000	12699
244000	670
362000	1478.5
255000	4306.5
567000	12294
752000	30407
626000	30366
287000	787
456000	1366.8
469000	1019.4
176000	1145.5
547000	19974
303000	1860.7
55859	554.5
453000	11331
783000	10983
681000	18178
285000	1557.9
256000	1207.8
374000	7987
349000	975.6
304000	1337.7
423000	11231
130000	849.2
556000	35044
470000	8716.6
504000	1477
344000	712.2
627000	19468
528000	7874.6
958000	119000
586000	1235.9
221000	577.4
361000	8578.4
658000	1642.4
282000	1622.5
1470000	178000
481000	15761
339000	2217.2
725000	43151
431000	2913.5
333000	1148.8
366000	686.2
630000	35604
677000	5237.5
642000	19926
735000	5024.4
612000	1093.9
725000	148000
453000	9495.8
455000	617.7
550000	1604.2
348000	848.6
641000	23502
725000	13522
451000	31672
171000	626.9
515000	17975
409000	5747.4
415000	3071
517000	1524.4
592000	3849.4
443000	2233.8
421000	15425
561000	1707.6
463000	14449
336000	5496.7
538000	843.9
724000	3537.5
254000	1120.8
196000	586.9
517000	747.2
394000	13882
256000	4782.1
282000	740.1
357000	5427.5
271000	9966
312000	4923.4
1030000	41749
514000	19930
675000	22504
603000	18565
353000	7889.7
145000	630.4
604000	5754.5
584000	5369.4
227000	8700
264000	478.9
415000	6714.8
462000	885
556000	42069
537000	46589
484000	1900.6
1040000	64171
510000	3628
712000	8046.5
627000	15343
690000	1274.3
578000	15576
376000	2270.3
773000	5519.5
485000	5249.7
354000	1785
544000	14800
613000	4162.5
594000	3028.8
332000	11864
197000	681.1
451000	2357.7
1020000	8953.2
852000	81489
572000	14487
661000	7572.5
451000	47700
355000	11227
425000	1118.4
362000	910.7
1010000	35061
899000	79453
354000	2579.6
406000	1274.6
329000	14999
643000	16858
838000	17489
348000	859.6
1110000	18973
311000	3935
419000	5683.6
715000	49045
591000	13741
222000	613.7
707000	4549.2
264000	5248.8
450000	5132.5
342000	634.6
290000	770.5
710000	4529.3
126000	603
411000	10302
256000	720.5
289000	7045.4
229000	1221.8
910000	111000
549000	3931.5
649000	2452.2
882000	1870.9
713000	1631.5
399000	5803
643000	6944.4
524000	24736
562000	1460.2
437000	1900.5
391000	4098.1
191000	979
141000	1787.9
400000	1980.7
327000	1540.9
610000	7829.5
304000	19532
513000	6064.8
1320000	4083.7
366000	1921.2
757000	42998
371000	2042.3
256000	463.4
177000	957.9
749000	4094.5
717000	18667
329000	2006.7
822000	7658.1
228000	2540.2
547000	1001.3
461000	1994.3
354000	16355
587000	24885
210000	960.2
48852	629.7
745000	17316
437000	30420
511000	30821
418000	2869.8
119000	1098.7
597000	2107.3
299000	1296.3
132000	1263.5
615000	9317.4
331000	643.8
723000	1789.6
662000	8151.6
412000	2731.2
412000	2189.4
694000	23899
686000	10924
570000	29448
388000	6338.2
335000	4060.5
648000	7200.9
175000	999
767000	31922
436000	2783.6
580000	1335.1
219000	789.2
948000	78316
1190000	114000
1230000	86660
1020000	111000
942000	1533.3
633000	7182.2
267000	985.1
810000	4763.2
304000	2881.5
805000	9310.1
1290000	109000
736000	17445
308000	16520
344000	1266.5
735000	90178
238000	25148
434000	8649.8
431000	3853.5
458000	8577.5
558000	30037
1020000	5540
459000	11254
557000	1717.3
1070000	18166
494000	7221.2
722000	40644
286000	1222.1
400000	49967
1140000	44805
480000	2788.1
810000	19913
958000	99114
282000	2209.3
1180000	263000
701000	8047.8
1030000	191000
686000	5375.6
365000	4268.5
423000	711.4
375000	2758.4
1050000	17123
780000	81281
577000	41390
596000	44925
517000	14081
574000	2054.3
374000	1136.3
363000	907.5
182000	992.2
521000	20034
433000	2126.5
379000	6755.2
437000	2338.8
247000	1666.4
371000	43985
901000	11892
714000	39541
200000	343.7
87373	696.2
246000	794
419000	2695.9
788000	6439.5
392000	31599
27528	546
663000	8296.1
764000	70212
682000	24223
560000	1151.9
964000	18456
296000	783.7
253000	1055.5
426000	1125.1
718000	54875
178000	1067.7
335000	1254.4
279000	584.7
241000	796.5
346000	5309.3
337000	750.1
1050000	18251
382000	1785.5
143000	1197.4
689000	5656.8
427000	855.3
311000	25012
514000	2008.8
313000	928.3
75660	504
338000	999.3
765000	3296.9
419000	3424
112000	575.5
241000	3688.9
466000	35586
257000	1897.8
1290000	136000
540000	14727
463000	1092.5
511000	7702.6
429000	4458.9
339000	5653.5
306000	924.5
247000	5291
609000	1475.2
411000	1707.6
932000	115000
372000	36861
381000	1905
433000	7908.3
710000	96972
650000	17683
690000	5075
366000	5653.3
384000	2168
622000	1753.4
245000	1389.5
159000	828.6
259000	389.1
532000	36917
712000	33014
711000	2591.9
352000	841.8
160000	659.1
211000	830.6
611000	49916
445000	3954.8
198000	10183
294000	12689
670000	2625.5
538000	51460
447000	46341
697000	8621.1
533000	27563
655000	2233.3
427000	6383.4
233000	413.5
597000	6586.8
282000	1830.6
493000	37428
559000	28515
408000	1622
64178	582.4
470000	9535.8
619000	4710.3
476000	46589
379000	22528
381000	1317.6
420000	928.8
479000	2480
410000	16265
471000	5491.4
1170000	112000
269000	653.8
608000	11980
743000	12265
467000	18276
316000	2501.1
335000	4550.4
441000	5823.2
257000	845.3
606000	1207
963000	8293
610000	2917.6
483000	17461
579000	49947
670000	1059.5
589000	53947
434000	3089.8
823000	16161
262000	10346
94982	854.4
743000	3291.7
226000	907.2
320000	7122.7
518000	14831
504000	46852
354000	2652.6
582000	27719
480000	2896.2
510000	10173
413000	10343
853000	1654.6
200000	3002.4
493000	6006.7
560000	6857.2
806000	27497
648000	1271.9
767000	24654
629000	26878
868000	6800.5
221000	1232.6
757000	12106
274000	21916
288000	7630.3
866000	8069.1
550000	9502.6
287000	9291.3
569000	2148.7
822000	12701
296000	649.8
407000	1479.2
681000	32618
458000	1597.8
524000	7471.6
461000	907.6
378000	8267.9
677000	10634
400000	12391
507000	3738.3
509000	21206
681000	7543
400000	50417
738000	4319.5
774000	71804
496000	21890
720000	5012.6
303000	1159
784000	14273
592000	11275
791000	4266.7
606000	148000
730000	4626.1
457000	37690
467000	1787.4
345000	6219.4
629000	4098.5
433000	1703.3
557000	2090.4
862000	77743
537000	2618.8
457000	265.8
672000	20316
293000	5213.3
590000	3072.7
416000	1396
330000	1528.6
469000	848.8
287000	6482.5
577000	2805.9
236000	971.4
201000	754.5
490000	943.6
395000	8839.3
532000	56844
520000	945.9
586000	41706
848000	34298
397000	5744.9
226000	1508.7
434000	1384.3
317000	38811
410000	855.6
561000	2754.4
599000	566.8
486000	48376
660000	33115
215000	1149
585000	603.1
819000	12679
200000	733.4
23491	2848.8
756000	8637.7
527000	1059.6
230000	700.5
132000	731.8
506000	6990.3
418000	15211
424000	6952.7
763000	3690.5
518000	2725.1
424000	1135.5
340000	1738.9
443000	697.4
518000	19403
774000	52639
361000	7563.9
362000	857
447000	2140.1
98608	1156.4
506000	7269.8
460000	34062
391000	38993
319000	1580.2
466000	25908
23585	314.6
423000	3173.1
172000	879.7
951000	33851
25430	609.4
355000	941.7
335000	17956
233000	1429.6
326000	1295.6
447000	1640.3
443000	1648.8
302000	933.3
1040000	47067
816000	44992
754000	15192
353000	1125.9
356000	895
273000	17841
238000	1763.3
408000	2127.8
476000	7467.1
773000	10703
333000	4893.9
750000	15594
322000	4231.3
556000	1343
296000	3831
704000	43954
615000	6439.6
382000	9989.6
474000	4656.8
475000	1044.8
257000	732.7
1030000	17099
802000	47589
716000	10774
514000	34180
577000	9078.2
188000	1662.5
431000	12396
569000	11049
377000	3019.8
410000	18120
322000	554
756000	11656
573000	7601.4
814000	9163.4
546000	84313
552000	58419
327000	6101.4
329000	2060.2
797000	53007
341000	1638
273000	6336.4
549000	4944.8
442000	7682.9
414000	1518.5
388000	640.7
979000	6367.4
236000	781.1
374000	1194
384000	41330
394000	2175.9
544000	30460
484000	20931
516000	3520.7
299000	13068
515000	6938.3
673000	13450
730000	29945
521000	19179
646000	2111.8
277000	4199.7
438000	6720.5
917000	24569
683000	8703
336000	2756.7
281000	1581.6
219000	842.8
436000	618.8
1080000	5097.1
372000	999
333000	1500.1
277000	8845.9
599000	2938.2
399000	972
510000	63026
346000	1016
495000	5836.1
191000	2119.1
454000	11139
182000	1120.6
444000	10312
232000	7005.4
207000	4016.3
469000	1328.5
588000	900.5
482000	15133
694000	47120
418000	2234.7
603000	28017
140000	413.5
280000	2850.8
837000	18154
532000	2811.8
402000	686.8
552000	25078
302000	40590
434000	6330
471000	3499.4
826000	1882.9
519000	8122.8
463000	15196
502000	3403.8
602000	2609
269000	4674.9
380000	3644.5
508000	27137
589000	9896.1
480000	2236.4
342000	6044.5
511000	57601
669000	56763
448000	12249
524000	31191
608000	1055.8
556000	2334.3
383000	781.5
604000	4259.6
730000	9679.8
38556	580.5
695000	2103.9
498000	50984
595000	1487.6
576000	5530.3
302000	1635.4
961000	23354
541000	1236
607000	25417
234000	700.9
428000	12762
593000	43332
356000	498.8
491000	18293
181000	27228
255000	11007
231000	1016.1
328000	2840.4
368000	781.9
126000	576
681000	1055.2
468000	2027.9
430000	23302
631000	19685
982000	5143.2
406000	1783.3
627000	39037
364000	1356.2
663000	7306.8
629000	6234.1
205000	1957.1
558000	7053.9
264000	665.3
433000	5019.3
403000	1210.5
266000	1351.8
372000	18419
16479	600.8
1150000	1471
60673	453
324000	3089.1
895000	132000
474000	898.5
676000	5341.3
338000	3270.5
486000	1230.9
534000	6144.5
25046	611.1
467000	46195
291000	449.9
1010000	33332
1950000	78092
160000	1033.4
467000	22641
661000	61659
485000	93323
329000	995.5
436000	2156.3
728000	19296
374000	5863.8
351000	1255.7
355000	11289
632000	69013
367000	7068.5
483000	38500
365000	39839
293000	3852
155000	1157.5
894000	55923
648000	1881.8
669000	65945
640000	3679.6
539000	10732
500000	31166
296000	1278.4
434000	5924.6
429000	2766
405000	1120.9
450000	17660
569000	31310
490000	646.6
486000	27481
750000	28902
618000	34162
447000	1040.3
396000	7412.8
599000	7382.5
463000	1849
697000	13846
542000	9243.9
954000	103000
209000	987.4
204000	1520.2
347000	5281.8
75011	713.1
153000	500.9
399000	18332
500000	6939
753000	5560.6
281000	8601.5
210000	620.6
554000	29319
611000	4030.4
445000	2006
812000	35639
564000	2506.1
943000	89363
494000	1485.3
485000	59880
1010000	74620
377000	9356.6
404000	6452.6
336000	27067
565000	5890.4
208000	699.3
555000	19654
677000	10935
211000	428.6
405000	11216
953000	9681.1
736000	151000
1100000	72637
368000	16385
605000	6904.2
1110000	97569
729000	13655
432000	1484.6
356000	849.4
618000	27564
888000	14753
291000	747.3
448000	1722.1
277000	1047.6
340000	1223.1
418000	3770
561000	84499
439000	8024.3
318000	1276.8
461000	14228
404000	13294
499000	5657.2
570000	6404.5
499000	7049.1
617000	1825.5
359000	15158
1010000	26699
536000	931.4
541000	495.7
712000	5204.8
446000	16407
563000	1059.1
718000	86771
424000	2770.8
228000	1094.3
1050000	3824.1
595000	5484.3
544000	2034.5
749000	44521
909000	15496
787000	75804
467000	1668.6
469000	2348.6
1200000	4477.9
518000	3033.2
472000	40734
1520000	157000
336000	1461.6
330000	1096.5
428000	1266.4
140000	455.5
478000	3527.1
270000	1281.1
420000	9647.9
134000	1041.3
588000	19053
491000	3458.3
439000	3998.5
1150000	106000
401000	13571
445000	1981
282000	1180.1
575000	631.7
398000	6552.4
213000	5384
427000	4538.7
679000	4365.1
512000	3742.2
739000	4039.3
449000	3367
907000	8060.5
281000	621.6
549000	6759.5
372000	20853
468000	1107.3
449000	25553
230000	7865.5
850000	51634
615000	27458
172000	751.3
868000	15124
749000	1457.7
343000	957.1
344000	3609.9
430000	23656
282000	1348
672000	1221.3
416000	37920
185000	654
339000	8672
402000	11919
386000	10110
601000	1240.2
370000	682
292000	2289.5
27009	642.1
957000	2428.6
740000	57963
326000	30661
186000	857
341000	2363.1
414000	4830
283000	9494.6
575000	50357
131000	233.9
28190	932
267000	749.3
734000	20062
651000	2122
423000	7594
513000	2162.5
451000	17840
586000	25005
1010000	25955
599000	111000
577000	6683.5
211000	1208
278000	40116
143000	641.7
554000	2640.2
558000	2705.7
465000	1604.1
455000	3658.9
648000	72011
1130000	73116
391000	2605.4
737000	11048
472000	9806.9
641000	7923.4
493000	11227
291000	15900
579000	4923.5
225000	3612
443000	1127.2
282000	1136.9
451000	8767.5
163000	579.6
727000	10863
424000	3972.3
253000	1480.2
376000	3518.4
719000	12404
422000	2129.9
148000	839.9
709000	48657
647000	22392
340000	768.5
333000	9761.5
276000	1072.5
73996	764.5
396000	5679.7
502000	953.1
637000	3040.1
174000	640.1
75332	1027.5
486000	36839
1300000	4227
582000	1729.9
486000	1411.4
769000	56029
870000	5989.8
700000	4499.7
502000	6147.5
403000	7675.5
341000	13582
553000	4992.8
845000	26928
415000	2641.2
418000	74136
409000	891.1
145000	389.4
568000	41263
613000	1010.9
636000	48780
323000	4501.9
324000	1843.9
225000	4557.9
695000	1837.5
798000	58116
275000	11202
362000	898
786000	9800.4
483000	31249
438000	15633
236000	4345.5
642000	3317.5
357000	1028.6
996000	14833
981000	8106.3
211000	775
86024	876.6
1320000	153000
646000	9245.5
246000	4610.4
772000	5529
567000	107000
505000	18551
332000	2967.3
372000	1102
829000	2143
413000	1858.2
970000	8819.4
752000	30194
193000	636.2
816000	2792.2
288000	6096.8
417000	6788.7
535000	36625
520000	1661.4
394000	6829.9
391000	45361
662000	1209.4
434000	2619.5
290000	9760.1
364000	1054
336000	11343
356000	1243.5
437000	45914
344000	1261.1
445000	64971
896000	89911
785000	1151.4
243000	729
511000	25380
951000	9321.8
579000	58871
426000	2351.7
674000	7134.6
373000	1334.2
606000	53209
547000	8386.2
428000	1382.3
546000	3012.2
152000	675.9
279000	1052.5
401000	27749
968000	44127
557000	1639.5
313000	4394.2
565000	36937
629000	3894.5
477000	2758.7
290000	473.2
210000	271.1
608000	1832.4
451000	1904.5
433000	847.1
200000	11560
885000	65963
500000	1609.9
421000	1014
458000	4491.3
249000	758.5
577000	13563
394000	4382.7
403000	1609.2
243000	758.5
872000	15978
591000	4118.2
365000	824.6
740000	90688
488000	22207
414000	2052.6
399000	913.5
550000	1100.6
710000	4223.4
70861	721.4
413000	1083.3
468000	1053
290000	5610
767000	8658.5
611000	83992
737000	48814
390000	15065
535000	6249.1
403000	3230.2
98130	570.5
476000	57250
408000	970.3
581000	979.7
239000	863.2
305000	13983
626000	68095
846000	19841
654000	5244.8
626000	66814
468000	14553
26670	679.5
279000	1087.1
166000	654.7
550000	10145
162000	1495.5
309000	7570.2
610000	1623.1
499000	3894.9
1140000	49428
86009	599.9
386000	2689.6
1040000	17742
263000	3087.9
577000	95665
359000	2446.3
427000	2268
558000	1364.8
513000	2791.5
222000	1484.5
494000	2085.4
420000	21585
460000	2474.5
504000	18277
251000	1871
674000	1965.5
377000	4211.2
145000	971.4
342000	10890
284000	2192.4
485000	6680
614000	259000
743000	1546.4
625000	2254.9
427000	12789
463000	3550.5
564000	821.8
773000	4994.5
427000	34411
358000	1812.5
155000	848.1
509000	3012.7
614000	7710
636000	3204.2
235000	1360.7
864000	2841
349000	5008.7
1430000	206000
940000	9048.7
495000	1162.8
431000	5205.4
441000	1438.9
381000	3360.8
484000	97037
1660000	131000
1030000	17222
580000	62444
363000	1404.7
847000	6004.8
731000	6981
657000	1082.6
304000	2136.4
308000	1040.1
432000	1953
385000	13157
465000	43937
392000	991
328000	1272.6
200000	756.4
716000	21574
621000	1823.9
294000	14655
418000	927.8
413000	3779.8
554000	17900
973000	5514.7
617000	13515
560000	25790
260000	1422.7
272000	917.8
857000	21929
596000	89889
580000	6496.7
497000	21116
1130000	18049
457000	1346.4
589000	2191.3
408000	2071.4
420000	621.5
315000	14707
367000	1262.4
549000	21912
467000	1150.1
505000	30019
792000	1157.2
998000	24654
542000	31336
460000	25218
734000	1568.5
421000	2107.3
680000	84665
1380000	105000
219000	933.4
813000	9497.1
554000	14732
397000	969.1
215000	4221.4
478000	3362.5
137000	805.7
539000	15375
416000	1802.5
328000	3618.6
381000	1486
294000	611.2
47166	1035.1
389000	1259.6
519000	1933.9
516000	2343.1
744000	2790.5
715000	10874
663000	9503.1
183000	1069.4
543000	3346.4
304000	1219.9
588000	3643.3
678000	25850
422000	1750.5
297000	3944
663000	303.9
264000	534.5
285000	930.1
827000	43614
208000	930.5
135000	118.2
659000	9269.3
644000	45923
1280000	118000
1080000	79100
440000	5239.3
226000	8285.4
530000	6566.5
156000	7278.9
311000	1973.9
337000	14862
234000	13331
356000	10032
950000	60505
748000	1769.1
319000	1791.4
475000	7185
1110000	135000
278000	2695
734000	69818
482000	1112.7
153000	3885.6
241000	852.2
239000	1089.3
528000	3032
197000	833.3
503000	8936.2
379000	1999.2
428000	2735.1
206000	718.5
365000	2333.1
226000	2208.1
456000	5272.4
340000	41309
237000	1038.7
847000	1366.5
267000	761.1
211000	798.5
252000	1455
705000	1796.7
387000	1784.9
338000	5346.1
241000	284.5
570000	7362.1
973000	75488
396000	2279.9
281000	3235
873000	15242
175000	685
382000	2493.5
825000	93389
870000	10435
385000	5816.2
479000	761.5
701000	10728
455000	2390.8
216000	923.9
190000	648.2
900000	14162
433000	1351.2
657000	47712
436000	1472.3
600000	2150.4
337000	55796
306000	508.2
680000	15069
336000	353.3
31788	827.2
476000	10884
746000	22052
943000	35188
285000	16929
522000	980.4
85218	1081.2
206000	334.8
453000	1400.2
536000	2534.6
1260000	263000
317000	17102
204000	1253.1
517000	2906.2
333000	1099.8
298000	295.2
170000	815.6
792000	2879.1
715000	134000
424000	3354
430000	3153.4
245000	1287.1
695000	7466.9
340000	49370
725000	1827.8
419000	18183
408000	18341
539000	33125
336000	14106
367000	13667
514000	54957
703000	104000
327000	35814
1220000	5342.5
387000	8771.5
695000	60839
877000	2620.9
262000	1876.1
368000	1608
259000	1163.5
411000	5194
390000	8542.9
994000	42699
658000	2523.2
395000	14399
421000	1140.9
436000	1420.7
227000	2993.9
546000	8737.7
455000	7803.2
659000	4155.1
231000	1283.3
588000	34052
469000	27659
1040000	18532
64481	1065.4
507000	960.5
554000	15164
349000	1344.5
548000	9079.7
413000	753.6
268000	1175.9
451000	12348
172000	649.5
762000	4708.8
220000	14689
380000	2833.6
346000	6451.2
667000	3310.9
499000	8522.5
362000	8236.8
299000	1001.9
561000	4875
483000	28004
465000	78929
734000	19945
197000	511.5
648000	14608
628000	2259
322000	958.9
560000	924.5
388000	11344
542000	6530.4
366000	340.3
445000	2134.6
481000	1178.5
165000	734.9
213000	1530.4
193000	1716.6
586000	1259.4
287000	1398
392000	36106
348000	3243.4
656000	45736
268000	663.6
486000	2709.5
612000	30378
638000	5375.9
443000	1112.2
766000	6477.9
392000	10357
306000	1366.7
547000	32998
250000	1127.9
744000	29005
630000	66113
585000	5678.7
546000	2738.2
165000	938.9
546000	35120
347000	4916.2
289000	954.3
422000	10820
298000	2613.7
528000	10244
820000	98937
185000	879
281000	575.6
192000	1946
393000	2079.4
183000	868.1
390000	1988.7
413000	2886.7
193000	2014.9
691000	23035
476000	37083
203000	1333.9
457000	42310
527000	1291.5
263000	857.7
717000	64218
640000	2809.3
576000	3347
491000	12715
344000	930.7
468000	1312.7
529000	7300.2
486000	2110
616000	2243
626000	20385
799000	8193.9
573000	22433
529000	76467
629000	9221
514000	2690.5
1090000	105000
373000	1591.9
264000	1963.7
244000	14272
294000	1030.9
458000	41647
463000	1894.1
307000	1951.2
321000	756.1
415000	2182.8
669000	91648
895000	70437
632000	26052
374000	27532
289000	673.7
1090000	30272
451000	2165.7
750000	2116.6
371000	6821
244000	1498.8
529000	26737
426000	10445
827000	2425.5
383000	200
514000	40048
540000	1714.7
660000	46397
382000	697
405000	4698
751000	4614.3
774000	21044
257000	970.6
524000	71728
541000	7319.4
821000	14900
390000	1592.9
455000	4684.5
965000	13481
647000	85704
581000	11344
680000	13641
572000	24697
608000	1368.7
313000	935.9
421000	35420
848000	7839.3
233000	758.9
629000	13770
254000	1782.7
577000	1689.2
401000	9353.4
463000	2333.4
276000	602.2
653000	1689.2
428000	18131
294000	9129.4
503000	1366.6
466000	1104.2
416000	864.7
466000	5475.6
617000	8199.7
516000	2645.5
262000	6029.4
736000	7571
524000	1785.2
434000	958
529000	31198
417000	3835.8
659000	107000
233000	1554.7
793000	10374
390000	1933.9
447000	16798
438000	36818
662000	1581
834000	16721
1000000	22285
382000	2308.7
246000	5221.1
63303	550.9
375000	10304
777000	11732
474000	11693
474000	14545
434000	8895.8
657000	4660.3
527000	41775
607000	100000
1080000	23476
342000	5885
430000	17892
780000	2527
648000	57106
374000	4893.7
768000	8588.7
435000	7069.7
590000	5482.7
544000	2144.8
571000	10858
410000	1231.7
502000	17080
645000	93138
700000	3620.4
201000	886.4
382000	267.7
412000	3823.7
429000	3809
447000	41344
795000	97562
432000	3194.6
626000	15569
316000	1448.2
467000	46476
394000	4544.4
284000	2254.3
671000	55553
133000	1094.3
502000	24470
1050000	15470
447000	70527
699000	2957.7
900000	1872.9
392000	3289.5
768000	1516.3
505000	2771
565000	47388
578000	2406.2
873000	10245
548000	3114.9
374000	2477.8
371000	31876
282000	501
257000	764.7
349000	1708.7
805000	1242.2
313000	1097
586000	8874.8
690000	3820.4
455000	6276.5
405000	8640.6
817000	2683.2
546000	1797.5
778000	84640
234000	881.4
194000	865.7
591000	2592
389000	2088
418000	1396
569000	5042.2
210000	916.6
180000	1399.3
1440000	1239.5
406000	11777
311000	1150.5
587000	38491
405000	644.5
762000	69952
818000	8286.6
442000	18046
505000	8280.8
665000	8487
289000	538.5
776000	87596
215000	868.6
495000	5811.4
221000	877
248000	1307.6
492000	6188.3
381000	1522.3
489000	12879
570000	4724.6
327000	19624
518000	7956.3
1110000	11951
834000	4656
316000	1101.2
455000	1091.7
762000	14396
527000	1237.3
485000	993.3
903000	141000
347000	1138.9
157000	964.4
170000	1468.2
593000	33581
539000	8044
209000	5401.4
487000	59299
449000	25005
572000	21322
357000	9079
435000	12527
570000	1367.9
282000	7677.8
365000	1167.6
718000	91259
65625	804.8
489000	1046
396000	10353
394000	7209.9
779000	1978.1
[truncated: 98,641 more rows]

## Sheet: Fig1H-1
GFP-GAVPO	mRuby
124790	1010.9
206250	1806.3
252240	2956.1
288930	4208.1
320600	5298.4
350330	6257
378240	8243.8
404480	9656.7
429880	10626
455600	11677
482160	13580
509550	15439
539100	16499
570790	18025
607060	20009
648510	22468
698840	26091
763590	29254
857680	35225
1098300	59909

## Sheet: Fig1H-2
GFP-GAVPO	mRuby-fitting	mRuby-high-cooperativity-model
10000	9.6402	1000
20000	34.898	1000
30000	74.066	1000
40000	126.33	1000
50000	191.15	1000
60000	268.12	1000
70000	356.93	1000
80000	457.32	1000
90000	569.06	1000
100000	691.96	1000
110000	825.86	1000.1
120000	970.61	1000.2
130000	1126.1	1000.3
140000	1292.1	1000.6
150000	1468.6	1001.1
160000	1655.5	1001.8
170000	1852.7	1002.9
180000	2060	1004.5
190000	2277.5	1007
200000	2504.9	1010.5
210000	2742.3	1015.5
220000	2989.6	1022.5
230000	3246.8	1032.2
240000	3513.6	1045.2
250000	3790.2	1062.6
260000	4076.4	1085.7
270000	4372.1	1115.8
280000	4677.4	1154.9
290000	4992.2	1204.9
300000	5316.4	1268.5
310000	5650	1348.6
320000	5992.9	1448.8
330000	6345.2	1573
340000	6706.7	1725.9
350000	7077.4	1912.9
360000	7457.2	2139.8
370000	7846.3	2413.4
380000	8244.4	2741
390000	8651.6	3130.8
400000	9067.8	3591.2
410000	9493.1	4131.4
420000	9927.3	4760.9
430000	10370	5489.2
440000	10822	6325.7
450000	11283	7279.2
460000	11753	8357.5
470000	12232	9567.3
480000	12719	10913
490000	13215	12397
500000	13720	14019
510000	14234	15776
520000	14756	17659
530000	15287	19660
540000	15827	21764
550000	16375	23955
560000	16932	26214
570000	17498	28519
580000	18072	30850
590000	18654	33184
600000	19245	35500
610000	19845	37778
620000	20453	39999
630000	21069	42149
640000	21694	44214
650000	22327	46183
660000	22969	48051
670000	23619	49811
680000	24278	51461
690000	24945	53001
700000	25620	54432
710000	26303	55757
720000	26995	56981
730000	27695	58106
740000	28403	59140
750000	29119	60087
760000	29844	60953
770000	30577	61744
780000	31318	62465
790000	32067	63122
800000	32825	63721
810000	33590	64265
820000	34364	64761
830000	35146	65212
840000	35936	65621
850000	36734	65994
860000	37540	66333
870000	38354	66641
880000	39176	66921
890000	40007	67176
900000	40845	67409
910000	41691	67620
920000	42545	67813
930000	43408	67989
940000	44278	68150
950000	45156	68296
960000	46042	68430
970000	46936	68552
980000	47838	68664
990000	48748	68766
1000000	49666	68860
1010000	50592	68946
1020000	51525	69025
1030000	52467	69097
1040000	53416	69163
1050000	54373	69224
1060000	55338	69280
1070000	56311	69332
1080000	57291	69379
1090000	58280	69423
1100000	59276	69464
1110000	60280	69501
1120000	61292	69535
1130000	62311	69567
1140000	63338	69596
1150000	64373	69623
1160000	65416	69648
1170000	66466	69672
1180000	67524	69693
1190000	68590	69713
1200000	69664	69732

## Sheet: Fig1H-3
GFP-GAVPO or mRuby log10	GFP histogram experiment	mRuby histogram prediction1 red histogram	mRuby histogram prediction2 black histogram
1	0	0.0004054	0
1.05	0	0	0
1.1	0	0	0
1.15	0	5.0675e-05	0
1.2	0	5.0675e-05	0
1.25	0	1.6892e-05	0
1.3	0	5.0675e-05	0
1.35	0	5.0675e-05	0
1.4	0	3.3783e-05	0
1.45	0	0.00011824	0
1.5	0	0.00010135	0
1.55	0	0.00010135	0
1.6	0	6.7566e-05	0
1.65	0	0.00011824	0
1.7	0	3.3783e-05	0
1.75	0	6.7566e-05	0
1.8	0	0.00018581	0
1.85	0	0.00018581	0
1.9	0	0.00023648	0
1.95	0	0.00011824	0
2	0	0.00023648	0
2.05	0	0.00023648	0
2.1	0	0.00027027	0
2.15	0	0.00023648	0
2.2	0	0.00032094	0
2.25	0	0.00048986	3.3783e-05
2.3	0	0.0004054	1.6892e-05
2.35	0	0.00043918	6.7566e-05
2.4	0	0.00047296	0.00023648
2.45	0	0.00050675	0.00047296
2.5	0	0.00076012	0.00064188
2.55	0	0.00084458	0.0016216
2.6	0	0.00092904	0.0026182
2.65	1.6892e-05	0.00097971	0.004054
2.7	0	0.00125	0.0064864
2.75	0	0.0015034	0.0094424
2.8	0	0.0019763	0.012534
2.85	0	0.0025	0.016081
2.9	0	0.0026689	0.020304
2.95	0	0.0031587	0.023986
3	0	0.0038175	0.027381
3.05	0	0.0046114	0.027702
3.1	1.6892e-05	0.0055236	0.029662
3.15	0	0.0068073	0.028851
3.2	1.6892e-05	0.0075337	0.028445
3.25	1.6892e-05	0.0090539	0.02728
3.3	0	0.010169	0.025
3.35	0	0.011638	0.024189
3.4	0	0.01353	0.020692
3.45	3.3783e-05	0.015675	0.019865
3.5	0	0.019256	0.018834
3.55	1.6892e-05	0.020456	0.018479
3.6	0	0.023902	0.017297
3.65	1.6892e-05	0.02679	0.017533
3.7	1.6892e-05	0.029527	0.016638
3.75	5.0675e-05	0.033175	0.01755
3.8	1.6892e-05	0.033986	0.0163
3.85	1.6892e-05	0.039932	0.016959
3.9	5.0675e-05	0.043395	0.017128
3.95	6.7566e-05	0.044712	0.016858
4	3.3783e-05	0.046672	0.016993
4.05	3.3783e-05	0.047736	0.017821
4.1	5.0675e-05	0.04804	0.017179
4.15	3.3783e-05	0.048445	0.01799
4.2	6.7566e-05	0.047094	0.017787
4.25	0.00015202	0.045202	0.018023
4.3	0.00013513	0.041925	0.019594
4.35	0.00015202	0.038479	0.02179
4.4	0.00010135	0.034966	0.021554
4.45	0.00030405	0.031554	0.023547
4.5	0.00047296	0.027348	0.025135
4.55	0.0004054	0.023766	0.025574
4.6	0.00042229	0.02054	0.026891
4.65	0.00047296	0.017415	0.027871
4.7	0.0006081	0.013699	0.026959
4.75	0.0008108	0.010388	0.026469
4.8	0.00086147	0.0084965	0.02429
4.85	0.001554	0.0062499	0.02152
4.9	0.0017398	0.0048141	0.019645
4.95	0.0023817	0.0034797	0.014983
5	0.0029054	0.0024324	0.012128
5.05	0.004527	0.0017398	0.008885
5.1	0.0063344	0.0012838	0.0065371
5.15	0.0081586	0.0010135	0.0038682
5.2	0.012263	0.00052364	0.0023142
5.25	0.015929	0.00037162	0.0018243
5.3	0.021925	0.00016892	0.00086147
5.35	0.027787	0.00025337	0.00030405
5.4	0.037837	8.4458e-05	0.00023648
5.45	0.050405	0.00010135	0.00013513
5.5	0.06358	1.6892e-05	3.3783e-05
5.55	0.079627	3.3783e-05	0
5.6	0.092465	0	1.6892e-05
5.65	0.10356	0	0
5.7	0.10349	0	0
5.75	0.096485	0	0
5.8	0.0826	0	0
5.85	0.065033	0	0
5.9	0.046435	0	0
5.95	0.032026	0	0
6	0.018361	0	0
6.05	0.0091046	0	0
6.1	0.0043918	0	0
6.15	0.0022466	0	0
6.2	0.0008108	0	0
6.25	0.00032094	0	0
6.3	0.00013513	0	0
6.35	5.0675e-05	0	0
6.4	3.3783e-05	0	0
6.45	1.6892e-05	0	0
6.5	0	0	0
6.55	0	0	0
6.6	0	0	0
6.65	0	0	0
6.7	0	0	0
6.75	0	0	0
6.8	0	0	0
6.85	0	0	0
6.9	0	0	0
6.95	0	0	0
7	0	0	0
7.05	0	0	0
7.1	0	0	0
7.15	0	0	0
7.2	0	0	0
7.25	0	0	0
7.3	0	0	0
7.35	0	0	0
7.4	0	0	0
7.45	0	0	0
7.5	0	0	0
7.55	0	0	0
7.6	0	0	0
7.65	0	0	0
7.7	0	0	0
7.75	0	0	0
7.8	0	0	0
7.85	0	0	0
7.9	0	0	0
7.95	0	0	0
8	0	0	0

## Sheet: Fig1I
time min	mean AM 100uW		time min	mean PWM 400m 100uW		time min	mean AM 25uW
0	2.3367		0	2.3356		0	2.3517
200	2.4051		200	2.3552		300	2.4023
500	3.069		400	2.6641		600	2.7418
800	3.6176		600	2.9705		900	2.9647
1100	3.8846		800	3.1364		1200	3.2405
1400	4.0493		1000	3.2571		1600	3.5686
1700	4.1944		1200	3.4104		2000	3.6501
2000	4.3456		1400	3.3823		2400	3.8529
2400	4.4701		1600	3.4415		2800	3.6251
2800	4.4616		1800	3.5771
			2000	3.5452
			2200	3.5356
			2400	3.5742
			2800	3.6218

## Sheet: Fig1J
time min	CV AM 100uW		time min	CV PWM 400m 100uW		time min	CV AM 25uW
0	0.45768		0	0.40486		0	0.50207
200	2.0825		200	0.43695		300	0.49738
500	1.0577		400	0.92542		600	1.4802
800	0.98946		600	1.0133		900	1.8027
1100	0.93874		800	1.0412		1200	1.8948
1400	0.9631		1000	0.97202		1600	1.5783
1700	0.92409		1200	0.91995		2000	1.652
2000	0.85033		1400	0.98143		2400	1.6088
2400	0.81874		1600	0.96335		2800	1.9736
2800	0.84775		1800	0.90723
			2000	0.9285
			2200	0.99228
			2400	0.97006
			2800	0.97478
