# Supplementary material for: Quantitative control of noise in mammalian gene expression by dynamic histone regulation
Source: eLife. 2021 Aug 11;10:e65654. doi: 10.7554/eLife.65654 (PMC8357418; doi:10.7554/eLife.65654)
Supplement: Figure 2—figure supplement 1—source data 1. [file elife-65654-fig2-figsupp1-data1.xlsx]

## Sheet: Fig2S2-A
log(G)	control	LMK-0.25	LMK-0.50	LMK-1.00
1	0	0	0	0
1.2	0	0	0	0
1.4	0	0	0	0
1.6	0	0	0	0
1.8	2.0231e-05	0	0	0
2	2.0231e-05	2.7248e-05	0	0
2.2	0	8.1744e-05	0	0
2.4	2.0231e-05	0.00016349	0	0
2.6	0.00016185	0.00040872	0.00016324	0.00010677
2.8	0.00099132	0.0033243	0.00094682	5.3387e-05
3	0.0073439	0.019891	0.0058441	0.0008542
3.2	0.029295	0.044223	0.018577	0.0020821
3.4	0.047806	0.046458	0.024519	0.00331
3.6	0.052419	0.042371	0.025531	0.0037905
3.8	0.057355	0.045913	0.030853	0.0072607
4	0.061179	0.04703	0.039832	0.010784
4.2	0.064416	0.055477	0.0461	0.01655
4.4	0.070262	0.0603	0.060139	0.024505
4.6	0.076291	0.066403	0.075778	0.039507
4.8	0.083939	0.074414	0.088903	0.055309
5	0.095187	0.084114	0.10069	0.07944
5.2	0.097554	0.089755	0.10797	0.10218
5.4	0.092678	0.093297	0.10389	0.12114
5.6	0.078416	0.085695	0.10053	0.12749
5.8	0.050497	0.07049	0.078945	0.13304
6	0.024318	0.043733	0.052826	0.12311
6.2	0.0076878	0.019864	0.026543	0.088249
6.4	0.0017399	0.0053678	0.009207	0.044579
6.6	0.00040462	0.0010899	0.0020569	0.014948
6.8	0	0.00010899	0.00016324	0.0017084
7	0	0	0	0
7.2	0	0	0	0
7.4	0	0	0	0
7.6	0	0	0	0
7.8	0	0	0	0
8	0	0	0	0

## Sheet: Fig2S2-B
log10(GFP)	control					LMK
1	0.16	0.24	0.32	0.48	0.56	0	0.08	0.16	0.24	0.32
1.05	0.16	0.24	0.32	0.48	0.56	0	0.08	0.16	0.24	0.32
1.1	0.16002	0.24	0.32	0.48	0.56	0	0.08	0.16	0.24	0.32
1.15	0.16	0.24	0.32	0.48	0.56	0	0.08	0.16	0.24	0.32
1.2	0.16	0.24	0.32	0.48	0.56	0	0.08	0.16	0.24	0.32
1.25	0.16	0.24	0.32	0.48	0.56	0	0.08	0.16	0.24	0.32
1.3	0.16	0.24	0.32	0.48	0.56	0	0.08	0.16	0.24	0.32
1.35	0.16	0.24	0.32	0.48	0.56	0	0.08	0.16	0.24	0.32
1.4	0.16	0.24	0.32	0.48	0.56	0	0.08	0.16	0.24	0.32
1.45	0.16	0.24	0.32	0.48	0.56	0	0.08	0.16	0.24	0.32
1.5	0.16	0.24002	0.32	0.48	0.56	0	0.08	0.16	0.24	0.32
1.55	0.16	0.24	0.32	0.48	0.56	0	0.08	0.16	0.24	0.32
1.6	0.16	0.24	0.32	0.48	0.56	3.5461e-05	0.08	0.16	0.24	0.32
1.65	0.16	0.24	0.32	0.48	0.56	0	0.08	0.16	0.24	0.32
1.7	0.16	0.24	0.32	0.48	0.56	0	0.08	0.16	0.24	0.32
1.75	0.16	0.24	0.32	0.48	0.56	0	0.08	0.16	0.24	0.32
1.8	0.16	0.24	0.32	0.48	0.56	0	0.08	0.16	0.24	0.32
1.85	0.16	0.24	0.32	0.48	0.56	0	0.08	0.16	0.24	0.32
1.9	0.16	0.24	0.32	0.48	0.56	0	0.08	0.16	0.24	0.32
1.95	0.16	0.24	0.32	0.48	0.56	3.5461e-05	0.08	0.16	0.24	0.32
2	0.16	0.24	0.32	0.48	0.56	0	0.08	0.16	0.24	0.32
2.05	0.16	0.24	0.32	0.48	0.56	0	0.08	0.16	0.24	0.32
2.1	0.16	0.24	0.32	0.48	0.56	0	0.080038	0.16	0.24	0.32
2.15	0.16002	0.24	0.32	0.48	0.56	0	0.08	0.16	0.24	0.32
2.2	0.16	0.24	0.32	0.48	0.56	0	0.080038	0.16	0.24	0.32
2.25	0.16	0.24	0.32	0.48	0.56	0	0.08	0.16	0.24	0.32
2.3	0.16002	0.24	0.32	0.48	0.56	3.5461e-05	0.080038	0.16	0.24	0.32
2.35	0.16002	0.24	0.32	0.48	0.56	0	0.080038	0.16	0.24	0.32
2.4	0.16004	0.24	0.32	0.48	0.56	0	0.08	0.16	0.24	0.32
2.45	0.16002	0.24	0.32	0.48	0.56	0	0.080038	0.16	0.24	0.32
2.5	0.16002	0.24	0.32	0.48	0.56	0	0.08	0.16	0.24	0.32
2.55	0.16	0.24002	0.32	0.48	0.56	3.5461e-05	0.08	0.16004	0.24	0.32
2.6	0.16006	0.24004	0.32	0.48	0.56	3.5461e-05	0.08	0.16004	0.24	0.32
2.65	0.16013	0.24002	0.32	0.48	0.56	3.5461e-05	0.080038	0.16007	0.24	0.32
2.7	0.16015	0.24002	0.32002	0.48	0.56	0.00024823	0.080115	0.16007	0.24	0.32
2.75	0.16017	0.2401	0.32	0.48	0.56005	0.0001773	0.080115	0.16007	0.24009	0.32
2.8	0.16048	0.24021	0.32	0.48	0.5601	0.00024823	0.080077	0.16011	0.24009	0.32
2.85	0.1608	0.24027	0.32	0.48	0.56	0.00070922	0.080306	0.16	0.24005	0.32
2.9	0.16122	0.24048	0.32002	0.48005	0.56005	0.00070922	0.080459	0.16011	0.24	0.32005
2.95	0.16271	0.24136	0.32	0.48005	0.56	0.0019149	0.080612	0.16048	0.24009	0.32005
3	0.16623	0.24209	0.32	0.48	0.56016	0.0039716	0.081531	0.16067	0.24019	0.32
3.05	0.17135	0.24406	0.32	0.48	0.56	0.0081206	0.08333	0.16134	0.24033	0.32
3.1	0.18078	0.24737	0.32	0.48	0.56005	0.015709	0.087387	0.16283	0.24079	0.32
3.15	0.19764	0.25378	0.32004	0.48005	0.56	0.030993	0.094812	0.16536	0.24135	0.32005
3.2	0.21752	0.26104	0.32	0.48005	0.5601	0.052128	0.10599	0.17277	0.24293	0.32005
3.25	0.24116	0.27099	0.32002	0.48016	0.56021	0.085567	0.12302	0.17946	0.24535	0.32016
3.3	0.2547	0.27735	0.32007	0.48042	0.56016	0.11578	0.14728	0.18951	0.24796	0.32042
3.35	0.25957	0.27813	0.32004	0.48026	0.56031	0.13713	0.16654	0.20187	0.25308	0.32026
3.4	0.24892	0.27765	0.32007	0.48031	0.56057	0.13117	0.17718	0.20675	0.25415	0.32031
3.45	0.22547	0.27164	0.32	0.48042	0.56063	0.10156	0.16493	0.20578	0.25574	0.32042
3.5	0.20641	0.26601	0.32002	0.48047	0.56057	0.070355	0.14441	0.199	0.25643	0.32047
3.55	0.19036	0.25897	0.32011	0.48058	0.56047	0.041348	0.12225	0.19	0.25141	0.32058
3.6	0.18055	0.25487	0.32007	0.48058	0.56037	0.021844	0.10759	0.18181	0.24833	0.32058
3.65	0.17426	0.25133	0.32009	0.48037	0.56037	0.014858	0.097644	0.17459	0.24642	0.32037
3.7	0.17109	0.25028	0.32009	0.48047	0.56016	0.010426	0.093089	0.17217	0.24489	0.32047
3.75	0.17111	0.25001	0.32004	0.48026	0.56057	0.0098227	0.09087	0.16997	0.24424	0.32026
3.8	0.17036	0.24907	0.32007	0.48058	0.56047	0.0082979	0.089071	0.16856	0.24512	0.32058
3.85	0.16918	0.2493	0.32022	0.48073	0.56005	0.0079787	0.089951	0.16674	0.24377	0.32073
3.9	0.16788	0.24815	0.32033	0.48073	0.56026	0.0053901	0.08865	0.16689	0.24372	0.32073
3.95	0.16807	0.24815	0.32028	0.48084	0.56031	0.0062411	0.087693	0.16622	0.24307	0.32084
4	0.16763	0.24821	0.32022	0.48058	0.56037	0.0058156	0.086621	0.16547	0.24293	0.32058
4.05	0.16713	0.24792	0.32024	0.48063	0.56021	0.005461	0.087616	0.16499	0.24298	0.32063
4.1	0.16747	0.24731	0.32013	0.48037	0.5601	0.0050355	0.086468	0.16476	0.24228	0.32037
4.15	0.16642	0.24712	0.32015	0.48037	0.56031	0.004539	0.086085	0.16514	0.24284	0.32037
4.2	0.1665	0.24687	0.32004	0.4801	0.56026	0.0044326	0.085856	0.16417	0.24219	0.3201
4.25	0.16552	0.24607	0.32009	0.48037	0.5601	0.0044326	0.085435	0.16447	0.24177	0.32037
4.3	0.16568	0.24653	0.32009	0.48016	0.5601	0.0040426	0.085358	0.16528	0.24177	0.32016
4.35	0.16591	0.24683	0.32002	0.48016	0.56016	0.0042553	0.08532	0.16435	0.24233	0.32016
4.4	0.16591	0.24614	0.32002	0.48026	0.56016	0.0041489	0.084899	0.16432	0.24214	0.32026
4.45	0.16577	0.24626	0.32007	0.48031	0.5601	0.0044681	0.085282	0.16424	0.24214	0.32031
4.5	0.16593	0.2467	0.32004	0.4801	0.56021	0.0044326	0.085626	0.16387	0.24196	0.3201
4.55	0.16637	0.24632	0.32004	0.48	0.56016	0.0032979	0.085626	0.16335	0.24177	0.32
4.6	0.1664	0.24651	0.32004	0.48	0.56026	0.003156	0.085243	0.16398	0.24233	0.32
4.65	0.16581	0.24735	0.32011	0.48016	0.56016	0.0029433	0.085473	0.16368	0.24172	0.32016
4.7	0.16577	0.24747	0.32009	0.4801	0.56037	0.0031915	0.08532	0.16368	0.24205	0.3201
4.75	0.16585	0.24745	0.32004	0.48005	0.56026	0.0028723	0.08444	0.16368	0.24177	0.32005
4.8	0.16564	0.24702	0.32009	0.48021	0.56021	0.0030142	0.085397	0.16406	0.24191	0.32021
4.85	0.16602	0.24708	0.32007	0.4801	0.56037	0.0030496	0.08555	0.1638	0.24247	0.3201
4.9	0.16575	0.24733	0.32007	0.4801	0.5601	0.003156	0.084708	0.16406	0.24168	0.3201
4.95	0.16587	0.24779	0.32018	0.48005	0.56037	0.0021986	0.085014	0.16398	0.24233	0.32005
5	0.16581	0.2475	0.32013	0.48037	0.56031	0.0020567	0.085626	0.16305	0.24172	0.32037
5.05	0.16539	0.2475	0.32007	0.48026	0.56057	0.0023404	0.084708	0.16398	0.24256	0.32026
5.1	0.16577	0.24766	0.32024	0.48021	0.56052	0.002305	0.084861	0.1638	0.24251	0.32021
5.15	0.16478	0.24764	0.32022	0.48026	0.56063	0.0025887	0.084555	0.16395	0.24228	0.32026
5.2	0.16455	0.24687	0.32035	0.48063	0.56078	0.0023404	0.085358	0.16402	0.24298	0.32063
5.25	0.16434	0.24718	0.32055	0.48084	0.56115	0.0018794	0.085205	0.16454	0.24303	0.32084
5.3	0.1647	0.24704	0.32053	0.48058	0.56141	0.0017021	0.086392	0.16581	0.24331	0.32058
5.35	0.16415	0.24745	0.32046	0.48073	0.56183	0.0018794	0.086315	0.16622	0.24419	0.32073
5.4	0.16367	0.24781	0.32083	0.48099	0.56183	0.0019149	0.087042	0.16659	0.2448	0.32099
5.45	0.16363	0.24882	0.32127	0.48167	0.56297	0.001773	0.087808	0.16852	0.24703	0.32167
5.5	0.1634	0.24873	0.32171	0.48157	0.56355	0.0020922	0.087616	0.17161	0.2488	0.32157
5.55	0.16365	0.2503	0.32291	0.48131	0.56423	0.0015248	0.088573	0.17351	0.25127	0.32131
5.6	0.16331	0.25082	0.32366	0.48209	0.56678	0.0015957	0.089913	0.17589	0.25606	0.32209
5.65	0.16373	0.253	0.32545	0.48319	0.56751	0.0018085	0.091482	0.18051	0.25932	0.32319
5.7	0.16417	0.25395	0.3281	0.48418	0.57012	0.0020213	0.092975	0.18367	0.2644	0.32418
5.75	0.16424	0.25784	0.33283	0.48523	0.57476	0.0015603	0.093625	0.18977	0.27175	0.32523
5.8	0.1647	0.26021	0.33907	0.4892	0.58071	0.0013475	0.095845	0.1935	0.27599	0.3292
5.85	0.16591	0.26414	0.34678	0.49134	0.58671	0.0010993	0.095577	0.19807	0.28544	0.33134
5.9	0.16575	0.26795	0.357	0.49814	0.59547	0.0012057	0.097032	0.20314	0.29489	0.33814
5.95	0.16656	0.27122	0.37294	0.50556	0.6094	0.0010284	0.095615	0.20392	0.30378	0.34556
6	0.16734	0.27576	0.38583	0.51753	0.61905	0.00042553	0.093817	0.20678	0.30807	0.35753
6.05	0.16671	0.27625	0.40094	0.53196	0.63726	0.00067376	0.092171	0.20455	0.31403	0.37196
6.1	0.16629	0.27564	0.41158	0.54812	0.64597	0.0006383	0.090028	0.19953	0.31319	0.38812
6.15	0.16661	0.27419	0.42119	0.57065	0.66282	0.00056738	0.087004	0.1916	0.31282	0.41065
6.2	0.16572	0.27193	0.42356	0.58534	0.6625	0.00039007	0.085932	0.18334	0.29848	0.42534
6.25	0.16419	0.2662	0.41675	0.59187	0.66214	0.00010638	0.083483	0.17775	0.2867	0.43187
6.3	0.16378	0.26014	0.40643	0.59517	0.64779	3.5461e-05	0.082488	0.16994	0.27455	0.43517
6.35	0.16218	0.25401	0.38866	0.58508	0.63042	7.0922e-05	0.08134	0.16689	0.26328	0.42508
6.4	0.16155	0.24886	0.37099	0.56197	0.60977	3.5461e-05	0.080689	0.16301	0.25364	0.40197
6.45	0.16092	0.24532	0.35352	0.53672	0.59036	3.5461e-05	0.080306	0.1619	0.24712	0.37672
6.5	0.16036	0.24299	0.34106	0.51686	0.57424	3.5461e-05	0.080077	0.1613	0.24466	0.35686
6.55	0.16015	0.24119	0.33173	0.49945	0.56897	0	0.080038	0.16037	0.24284	0.33945
6.6	0.16006	0.24052	0.32609	0.48962	0.56386	7.0922e-05	0.080038	0.16022	0.24088	0.32962
6.65	0.16002	0.24019	0.3219	0.48523	0.56162	0	0.08	0.16004	0.24033	0.32523
6.7	0.16006	0.24011	0.32094	0.4824	0.56089	0	0.08	0.16007	0.24023	0.3224
6.75	0.16	0.24	0.32018	0.48131	0.56042	0	0.08	0.16004	0.24005	0.32131
6.8	0.16002	0.24	0.32009	0.48073	0.56021	0	0.08	0.16	0.24005	0.32073
6.85	0.16	0.24	0.32004	0.4801	0.5601	0	0.08	0.16	0.24005	0.3201
6.9	0.16	0.24	0.32	0.48	0.56005	0	0.08	0.16	0.24	0.32
6.95	0.16	0.24	0.32	0.48	0.56	0	0.08	0.16	0.24	0.32
7	0.16	0.24	0.32	0.48	0.56	0	0.08	0.16	0.24	0.32
7.05	0.16	0.24	0.32	0.48	0.56	0	0.08	0.16	0.24	0.32
7.1	0.16	0.24	0.32	0.48	0.56	0	0.08	0.16	0.24	0.32
7.15	0.16	0.24	0.32	0.48	0.56	0	0.08	0.16	0.24	0.32
7.2	0.16	0.24	0.32	0.48	0.56	0	0.08	0.16	0.24	0.32
7.25	0.16	0.24	0.32	0.48	0.56	0	0.08	0.16	0.24	0.32
7.3	0.16	0.24	0.32	0.48	0.56	0	0.08	0.16	0.24	0.32
7.35	0.16	0.24	0.32	0.48	0.56	0	0.08	0.16	0.24	0.32
7.4	0.16	0.24	0.32	0.48	0.56	0	0.08	0.16	0.24	0.32
7.45	0.16	0.24	0.32	0.48	0.56	0	0.08	0.16	0.24	0.32
7.5	0.16	0.24	0.32	0.48	0.56	0	0.08	0.16	0.24	0.32
7.55	0.16	0.24	0.32	0.48	0.56	0	0.08	0.16	0.24	0.32
7.6	0.16	0.24	0.32	0.48	0.56	0	0.08	0.16	0.24	0.32
7.65	0.16	0.24	0.32	0.48	0.56	0	0.08	0.16	0.24	0.32
7.7	0.16	0.24	0.32	0.48	0.56	0	0.08	0.16	0.24	0.32
7.75	0.16	0.24	0.32	0.48	0.56	0	0.08	0.16	0.24	0.32
7.8	0.16	0.24	0.32	0.48	0.56	0	0.08	0.16	0.24	0.32
7.85	0.16	0.24	0.32	0.48	0.56	0	0.08	0.16	0.24	0.32
7.9	0.16	0.24	0.32	0.48	0.56	0	0.08	0.16	0.24	0.32
7.95	0.16	0.24	0.32	0.48	0.56	0	0.08	0.16	0.24	0.32
8	0.16	0.24	0.32	0.48	0.56	0	0.08	0.16	0.24	0.32

## Sheet: Fig2S2-C
log10(Dox)	CV, control		log10(Dox)	CV, LMK
0	0.37194		0	0.36744
0.30103	3.6125		0.30103	2.5145
0.59106	5.9323		0.59106	5.6367
0.89209	11.172		0.89209	5.3101
1.1931	4.8327		1.1931	2.1469
1.3692	2.5981		1.3692	1.548
1.4955	1.5062		1.4955	1.1669
1.6712	0.86212		1.6712	0.94037
1.7959	0.60824		1.7959	0.73498
1.9722	0.48624		2.3979	0.46621
2.0969	0.44663		3	0.43133
2.3979	0.43146
2.699	0.442
3	0.45114
