# Supplementary material for: Quantitative control of noise in mammalian gene expression by dynamic histone regulation
Source: eLife. 2021 Aug 11;10:e65654. doi: 10.7554/eLife.65654 (PMC8357418; doi:10.7554/eLife.65654)
Supplement: Figure 2—figure supplement 2—source data 1. [file elife-65654-fig2-figsupp2-data1.xlsx]

## Sheet: Fig2S1-A
log(power)	AM, log10(R)		log(power)	AM+LMK, log10(R)
-1	2.3171		-0.90309	2.4876
0	2.3205		0	2.4652
0.60206	2.4294		0.60206	2.5694
0.8451	2.6141		0.8451	2.7364
1	2.8673		1	3.0806
1.1761	3.2828		1.1761	3.5937
1.301	3.6108		1.301	4.0378
1.3979	3.8732		1.3979	4.3603
1.5441	3.9496		1.5441	4.3754
1.6532	3.9622		1.6532	4.4167
1.7782	4.092		1.7782	4.5204
1.9031	4.2229		1.9031	4.6184
2	4.4898		2	4.6877
2.0969	4.5215

## Sheet: Fig2S1-B
log(power)	AM,CV		log(power)	AM+LMK, CV
-1	0.4367		-0.90309	0.43774
0	0.49558		0	0.45442
0.60206	1.2759		0.60206	0.74128
0.8451	2.14		0.8451	1.8815
1	2.5578		1	2.1607
1.1761	2.0637		1.1761	1.7326
1.301	1.6995		1.301	1.2468
1.3979	1.4714		1.3979	0.95753
1.5441	1.3773		1.5441	0.89379
1.6532	1.3139		1.6532	0.83305
1.7782	1.1965		1.7782	0.72986
1.9031	1.0748		1.9031	0.64318
2	0.84973		2	0.58983
2.0969	0.81875

## Sheet: Fig2S1-C
log(R)	AM,CV		log(R)	AM+LMK, CV
2.3171	0.4367		2.4876	0.43774
2.3205	0.49558		2.4652	0.45442
2.4294	1.2759		2.5694	0.74128
2.6141	2.14		2.7364	1.8815
2.8673	2.5578		3.0806	2.1607
3.2828	2.0637		3.5937	1.7326
3.6108	1.6995		4.0378	1.2468
3.8732	1.4714		4.3603	0.95753
3.9496	1.3773		4.3754	0.89379
3.9622	1.3139		4.4167	0.83305
4.092	1.1965		4.5204	0.72986
4.2229	1.0748		4.6184	0.64318
4.4898	0.84973		4.6877	0.58983
4.5215	0.81875

## Sheet: Fig2S1-D
log(power)	PWM, log10(R)		log(power)	PWM+LMK, log10(R)
-1	2.3171		-1	2.4876
0	2.4186		0.60206	2.7176
0.60206	2.761		0.8451	2.9008
0.8451	2.9061		1	3.0057
1	3.0832		1.1761	3.2324
1.1761	3.3216		1.301	3.43
1.301	3.4494		1.3979	3.6267
1.3979	3.5301		1.5441	3.848
1.5441	3.7059		1.6532	3.9805
1.6532	3.8626		1.7782	4.2065
1.7782	4.0304		1.9031	4.515
1.9031	4.3881		2	4.6877
2	4.4898
2.0969	4.5215

## Sheet: Fig2S1E
log(power)	AM,CV		log(power)	AM+LMK, CV
-1	0.4367		-1	0.43774
0	0.68095		0.60206	0.93584
0.60206	1.0494		0.8451	1.0419
0.8451	1.0623		1	1.0553
1	1.0281		1.1761	1.0569
1.1761	0.97805		1.301	0.96688
1.301	0.93027		1.3979	0.93017
1.3979	0.94793		1.5441	0.84846
1.5441	0.94245		1.6532	0.84307
1.6532	1.0039		1.7782	0.78449
1.7782	1.0514		1.9031	0.68144
1.9031	0.92223		2	0.58983
2	0.84973
2.0969	0.81875

## Sheet: Fig2S1-F
log(R)	AM,CV		log(R)	AM+LMK, CV
2.3171	0.4367		2.4876	0.43774
2.4186	0.68095		2.7176	0.93584
2.761	1.0494		2.9008	1.0419
2.9061	1.0623		3.0057	1.0553
3.0832	1.0281		3.2324	1.0569
3.3216	0.97805		3.43	0.96688
3.4494	0.93027		3.6267	0.93017
3.5301	0.94793		3.848	0.84846
3.7059	0.94245		3.9805	0.84307
3.8626	1.0039		4.2065	0.78449
4.0304	1.0514		4.515	0.68144
4.3881	0.92223		4.6877	0.58983
4.4898	0.84973
4.5215	0.81875
2.4876	0.43774
2.7176	0.93584
2.9008	1.0419
3.0057	1.0553
3.2324	1.0569
3.43	0.96688
3.6267	0.93017
3.848	0.84846
3.9805	0.84307
4.2065	0.78449
4.515	0.68144
4.6877	0.58983
