# Supplementary material for: Quantitative control of noise in mammalian gene expression by dynamic histone regulation
Source: eLife. 2021 Aug 11;10:e65654. doi: 10.7554/eLife.65654 (PMC8357418; doi:10.7554/eLife.65654)
Supplement: Figure 2—figure supplement 3—source data 1. [file elife-65654-fig2-figsupp3-data1.xlsx]

## Sheet: Fig2S3A_mRuby_high
1.5	0.6054	0.64567	0.55668	0.55668	0.77647	0.63496	0.63496	0.78532	0.77191	0.77191	0.64199	0.70831	0.70831	0.53895	0.53895	0.56065	0.56065	0.68611	0.68611	0.5431	0.5431	0.5431	0.5431	0.71673	0.71673	0.71673	1.1309	1.1309	0.51829	0.51829	0.56168	0.5418	0.56168	0.5418	0.5418	0.5418	0.64356	0.64356	0.64356	0.64356	0.73639	1.346	1.346	0.52166	0.52166	0.88023	0.68948	0.68948	1.0694
3	0.69714	0.59455	0.66419	0.66419	0.74467	0.72607	0.72607	0.84643	0.85783	0.85783	0.69665	0.73367	0.73367	0.53286	0.53286	0.6332	0.6332	0.73832	0.73832	0.634	0.634	0.634	0.634	0.82621	0.82621	0.82621	0.38042	0.38042	0.66526	0.66526	0.64297	0.59547	0.64297	0.59547	0.59547	0.59547	0.74345	0.74345	0.74345	0.74345	0.8269	1.3152	1.3152	0.55665	0.55665	0.48576	0.84901	0.84901	0.40975
4.5	0.80995	0.76327	0.79249	0.79249	0.84599	0.72854	0.72854	0.97223	1.1407	1.1407	0.87053	0.79277	0.79277	0.5353	0.5353	0.84002	0.84002	0.80279	0.80279	0.68939	0.68939	0.68939	0.68939	0.91095	0.91095	0.91095	0.37763	0.37763	0.88748	0.88748	0.65684	0.74858	0.65684	0.74858	0.74858	0.74858	0.95189	0.95189	0.95189	0.95189	1.1712	1.335	1.335	0.58303	0.58303	0.62406	1.4017	1.4017	0.47526
6	1.1762	1.15	0.89297	0.89297	0.89198	0.7848	0.7848	1.179	1.6983	1.6983	1.6453	0.98572	0.98572	0.5751	0.5751	1.0291	1.0291	0.98489	0.98489	0.64427	0.64427	0.64427	0.64427	1.6519	1.6519	1.6519	0.40545	0.40545	1.3499	1.3499	1.0656	1.2051	1.0656	1.2051	1.2051	1.2051	1.3739	1.3739	1.3739	1.3739	1.8396	1.3418	1.3418	0.71798	0.71798	0.69117	2.6509	2.6509	0.46053
7.5	0.73219	0.78924	1.356	1.356	0.74612	0.90892	0.90892	2.1064	2.6306	2.6306	0.98421	1.4197	1.4197	0.70683	0.70683	1.2905	1.2905	1.116	1.116	0.96405	0.96405	0.96405	0.96405	0.86055	0.86055	0.86055	0.43406	0.43406	1.932	1.932	1.6776	2.0528	1.6776	2.0528	2.0528	2.0528	1.9654	1.9654	1.9654	1.9654	1.3765	1.6094	1.6094	0.90449	0.90449	0.7111	5.3935	5.3935	0.59019
9	1.3174	1.313	2.1172	2.1172	1.0248	1.1437	1.1437	1.2467	3.9936	3.9936	1.2439	2.8596	2.8596	0.84706	0.84706	1.7039	1.7039	1.5921	1.5921	1.443	1.443	1.443	1.443	1.1563	1.1563	1.1563	0.51775	0.51775	2.7721	2.7721	2.9541	3.4673	2.9541	3.4673	3.4673	3.4673	2.7962	2.7962	2.7962	2.7962	2.0243	1.9054	1.9054	1.23	1.23	0.90249	3.6604	3.2911	1.0093
10.5	1.6297	1.7328	3.2831	3.2831	1.2077	1.5246	1.5246	1.9888	2.0029	2.0029	1.5389	1.5191	1.5191	1.3236	1.3236	1.2305	1.2305	0.83801	0.83801	2.9499	2.9499	2.9499	2.9499	1.5339	1.5339	1.5339	0.73628	0.73628	3.9014	3.9014	1.6374	5.0737	1.6002	5.0737	5.0737	5.0737	3.9102	3.9102	3.9102	3.9102	2.6123	2.063	2.063	1.7716	1.7716	1.2692	5.3886	4.9358	1.8304
12	1.899	1.9579	5.014	5.014	1.5784	2.256	2.256	2.8199	2.6963	2.6963	2.0956	2.112	2.112	2.2001	2.2001	1.7076	1.7076	1.5352	1.5352	1.8637	1.8637	1.9593	1.9593	1.9037	1.9037	1.9037	1.0375	1.0375	5.4135	5.4135	2.8893	2.5532	2.7921	2.707	2.5532	2.707	1.8529	1.8529	2.161	2.161	3.1655	3.415	3.415	2.7415	2.7415	1.6405	6.4122	5.9014	3.1419
13.5	2.4575	2.5099	6.6708	6.6708	2.088	1.7016	1.7016	3.9928	3.2744	3.2744	2.8517	2.8703	2.8703	4.0714	4.0714	2.4799	2.4799	2.0775	2.0775	2.8895	2.8895	2.7904	2.7904	3.0078	3.0078	3.0078	1.6336	1.6336	8.0973	8.0973	3.7171	4.1465	3.5548	4.4854	4.1465	4.4854	2.2836	2.2836	2.7347	2.7347	4.4367	2.7645	2.7645	4.174	4.174	2.1398	7.7944	6.781	5.0664
15	2.9575	2.9455	3.5709	4.1387	2.591	2.3064	2.3064	5.2574	3.8557	3.8557	3.6971	3.5548	3.5548	6.0483	6.0483	2.9806	2.9806	2.5796	2.5796	3.5452	3.5452	3.5836	3.5836	3.8033	3.8033	3.8033	2.2107	2.2107	4.6518	4.6518	4.3718	4.7286	4.2427	5.1934	4.7286	5.1934	2.5644	2.5644	2.9123	2.9123	5.6277	3.5615	3.5615	5.9432	5.9432	2.3825	8.8346	7.5696	6.6177
16.5	3.7176	3.7913	4.3059	5.0236	3.5827	2.9804	2.9804	6.6428	4.5497	4.5497	4.688	4.2078	4.2078	3.9506	3.9506	3.7783	3.7783	3.1342	3.1342	4.1996	4.1996	4.3664	4.3664	4.9913	4.9913	4.9913	2.9953	2.9953	5.288	5.288	4.9696	5.5809	4.8007	5.9101	5.5809	5.9101	2.8541	2.8541	3.2199	3.2199	6.9182	4.1654	4.1654	7.751	7.751	2.9708	9.8012	7.7835	7.6438
18	4.4359	4.4264	4.6812	5.4741	4.964	3.9523	3.9523	8.5215	5.3683	5.3683	5.8619	5.0849	5.0849	4.8652	4.8652	4.6001	4.6001	3.7897	3.7897	4.7437	4.7437	5.2208	5.2208	6.3564	6.3564	6.3564	3.9905	3.9905	5.7495	5.7495	6.1161	6.7127	5.7557	6.8912	6.7127	6.8912	3.4777	3.4777	3.9056	3.9056	8.2718	4.9362	4.9362	3.9783	3.9783	3.707	11.723	8.643	8.8013
19.5	5.3501	5.3723	4.6913	5.5845	6.3416	4.5396	4.5396	10.342	6.5483	6.5483	7.1914	5.866	5.866	5.8761	5.8761	5.7856	5.7856	4.5933	4.5933	5.5442	5.5442	6.5003	6.5003	7.393	7.393	7.393	4.8818	4.8818	6.3163	6.3163	6.7129	7.1224	6.1894	7.5178	7.1224	7.5178	4.3595	4.3595	4.6994	4.6994	9.3796	5.993	5.993	5.5093	5.5093	4.9688	13.735	9.722	9.6325
21	6.0203	6.0144	5.4099	6.226	8.1234	4.9308	4.9308	11.747	7.4766	7.4766	8.6537	6.6767	6.6767	6.7192	6.7192	6.7723	6.7723	5.3027	5.3027	6.3153	6.3153	7.7247	7.7247	9.4131	9.4131	9.4131	5.2537	5.2537	6.8377	6.8377	7.6021	8.1517	7.2691	8.8113	8.1517	8.8113	5.3607	5.3607	5.9341	5.9341	10.95	5.802	5.802	6.2919	6.2919	6.238	16.389	11.137	10.956
22.5	6.6489	6.8777	5.9126	6.9379	9.9143	5.2625	5.2625	13.934	8.7034	8.7034	10.253	7.5168	7.5168	7.7407	7.7407	7.8107	7.8107	6.1247	6.1247	7.0654	7.0654	9.1214	9.1214	11.271	11.271	11.271	6.535	6.535	7.217	7.217	8.4372	8.9823	8.0971	9.5965	8.9823	9.5965	6.5422	6.5422	7.1266	7.1266	12.011	6.2231	6.2231	6.9082	6.9082	8.6373	19.032	12.57	11.822
24	7.3432	7.5183	6.5654	7.5561	11.703	5.8657	5.8657	16.045	10.233	10.233	12.509	8.2158	8.2158	8.6913	8.6913	9.0835	9.0835	7.1642	7.1642	7.8048	7.8048	10.611	10.611	13.289	13.289	13.289	7.5572	7.5572	8.2204	8.2204	9.3005	9.6473	8.812	10.424	9.6473	10.424	7.8967	7.8967	8.615	8.615	13.248	7.1347	7.1347	7.0477	7.0477	9.2489	21.206	14.285	6.3702
25.5	7.7976	7.9752	7.4274	8.462	13.867	6.6157	6.6157	18.837	12.339	12.339	14.946	9.0832	9.0832	9.9943	9.9943	10.22	10.22	8.1018	8.1018	8.5637	8.5637	12.102	12.102	7.6307	6.741	7.6307	8.873	8.873	8.9458	8.9458	10.848	11.009	9.9247	11.292	11.009	11.292	8.9812	8.9812	10.067	10.067	13.936	7.4898	7.4898	7.7386	7.7386	5.9555	23.569	16.246	6.7935
27	8.3943	8.6209	8.1225	9.2816	15.904	6.9463	6.9463	20.171	13.848	13.848	7.4428	10.127	10.127	11.437	11.437	11.941	11.941	9.3602	9.3602	9.7086	9.7086	13.828	13.828	7.4387	7.9583	7.4387	10.19	10.19	9.9121	9.9121	11.988	12.504	11.211	12.017	12.504	12.017	11.074	11.074	12.103	12.103	8.3543	8.5052	8.5052	8.1343	8.1343	6.8715	26.986	18.858	7.0539
28.5	5.8318	5.8649	8.5848	10.143	17.819	7.78	7.78	22.548	15.542	15.542	8.5906	11.107	11.107	12.748	12.748	11.315	11.315	10.587	10.587	10.868	10.868	15.135	15.135	7.4403	9.5122	7.6952	11.335	11.335	10.61	10.61	12.75	13.531	12.013	12.232	13.531	12.232	12.332	12.332	13.448	13.448	8.7908	9.2101	9.2101	8.7059	8.7059	7.8957	30.897	22.36	7.2484
30	8.6313	8.9786	9.4081	11.142	18.48	8.5756	8.5756	24.695	17.68	17.68	9.6662	11.186	11.186	14.068	14.068	5.934	6.4254	12.068	12.068	12.596	12.596	16.431	16.431	7.6781	9.8532	8.0709	12.319	12.319	11.673	11.673	14.376	15.916	13.62	13.464	15.916	13.464	13.873	13.873	15.55	15.55	8.966	9.8868	9.8868	9.7938	9.7938	8.5644	35.248	26.386	7.2305
31.5	4.3216	4.4611	9.7727	11.386	10.315	9.5417	9.5417	24.376	9.4942	9.5234	10.552	5.4691	6.1805	15.881	15.881	8.3341	8.7296	13.553	13.553	8.1084	8.1084	17.538	17.538	8.3307	10.607	8.4953	5.7621	6.6492	12.726	12.726	15.853	18.019	14.658	15.159	18.019	15.159	15.734	15.734	7.8394	8.4736	9.1129	10.857	10.857	10.226	10.226	9.193	17.868	15.095	6.9731
33	4.306	4.5282	10.444	12.02	10.943	10.204	10.204	12.245	10.459	10.122	11.444	5.985	6.7513	17.275	17.275	8.8011	9.3483	6.8179	6.6603	7.8327	7.4994	19.177	19.177	8.9337	11.687	8.8932	6.4723	7.7589	14.168	14.168	7.1761	21.955	16.457	7.3997	21.955	7.8975	15.038	15.038	8.4004	9.1488	8.3829	11.331	11.331	11.661	11.661	9.5889	20.655	16.6	6.8098
34.5	4.2024	4.2898	10.699	11.531	11.552	11.6	11.6	13.959	10.971	10.795	11.84	6.1295	6.9145	19.651	19.651	9.2445	9.9477	7.263	7.3739	9.0583	8.4867	9.4585	9.4599	9.859	13.393	9.6969	6.6335	8.0668	15.016	15.016	9.8545	11.923	18.69	8.0446	9.593	8.3989	8.9558	8.6696	8.8707	9.3696	8.1295	12.201	12.201	12.764	12.764	10.153	22.068	18.17	6.8275
36	4.1162	4.2397	11.557	11.507	11.95	13.223	13.223	15.009	11.859	11.797	12.974	6.1767	6.7978	21.733	21.733	9.819	10.777	7.6324	7.6948	9.9295	9.1581	10.304	10.112	10.357	14.851	9.9092	7.0925	8.3195	17.329	17.329	10.401	12.916	8.592	8.3782	10.456	8.9929	10.11	9.5121	9.0109	9.7213	7.6927	13.143	13.143	14.256	14.256	10.362	22.267	19.328	6.5079
37.5	3.8017	3.9113	10.762	9.6159	11.408	14.375	14.375	15.476	12.7	12.386	14.111	5.9907	6.3248	22.763	22.763	10.482	11.295	7.4934	7.5607	10.227	9.412	10.526	10.321	11.244	16.647	10.996	7.0351	8.224	8.7972	8.2273	10.746	13.809	9.2443	8.836	11.452	9.2511	10.343	9.9793	9.0223	10.075	7.2183	13.819	13.819	15.756	15.756	11.115	22.939	20.596	6.4141
39	3.6115	3.7651	5.4288	4.6625	11.445	7.123	7.0572	16.589	14.083	13.475	15.137	6.0197	5.9543	7.3584	7.5902	11.762	12.512	7.3985	7.4309	10.676	9.7252	10.743	10.605	12.468	18.937	12.097	7.4024	8.4936	9.3591	8.6423	10.333	14.198	9.1459	8.853	11.858	9.0265	9.9781	10.076	8.9462	10.304	6.5837	6.0388	6.7671	5.3519	6.3089	11.79	23.333	21.974	6.3917
[truncated: 51 more columns]

## Sheet: Fig2S3_mRuby_low
1.5	0.82728	0.74412	0.82728	0.74412	0.74412	0.74412	0.51215	0.51215	0.51215	0.72351	0.68844	0.56181	0.56181	0.68844	0.81317	0.68844	0.68844	0.56513	0.501	0.501	0.501	0.501	0.70568	0.66281	1.2993	0.66281	1.2993	1.2993	0.66281	0.58492	1.2993	0.67802	0.67802	0.60027	0.53709	0.53709	0.62991	0.62991	0.54493	0.56892	0.58528	0.58528	0.81431	0.81431	0.71887	0.75734	0.75734	0.75734	0.75734
3	0.81001	0.67434	0.81001	0.67434	0.67434	0.67434	0.29731	0.29731	0.27935	0.63523	0.73912	0.57716	0.57716	0.73912	0.86496	0.73912	0.73912	0.56606	0.65725	0.65725	0.65725	0.65725	0.72882	0.7239	0.46409	0.7239	0.5689	0.46409	0.7239	0.56628	0.5689	0.72992	0.72992	0.66375	0.57873	0.57873	0.67695	0.67695	0.6575	0.58047	0.66375	0.66375	0.82414	0.82414	0.71348	0.90086	0.90086	0.90086	0.90086
4.5	0.83035	0.43388	0.83035	0.43388	0.41668	0.41668	0.38096	0.38096	0.39815	0.6307	0.7109	0.52003	0.52003	0.7109	0.8383	0.7109	0.7109	0.62217	0.64167	0.64167	0.64167	0.64167	0.73779	0.8742	0.46207	0.8742	0.55149	0.46207	0.8742	0.64031	0.55149	0.87199	0.87199	0.67932	0.54925	0.54925	0.68962	0.68962	0.67153	0.6041	0.82792	0.82792	0.8258	0.8258	0.73696	0.82231	0.82231	0.82231	0.82231
6	0.4031	0.45626	0.4031	0.45626	0.54194	0.54194	0.41721	0.41721	0.37636	0.71911	0.76519	0.55224	0.55224	0.76519	0.87831	0.76519	0.76519	0.64569	0.73004	0.73004	0.73004	0.73004	0.75276	0.75013	0.47997	0.75013	0.5407	0.47997	0.75013	0.62379	0.5407	0.8041	0.8041	0.6056	0.58123	0.58123	1.0967	1.0967	0.76742	0.65922	1.02	1.02	0.82359	0.82359	0.71514	0.77882	0.77882	0.77882	0.77882
7.5	0.60185	0.51536	0.60185	0.51536	0.557	0.557	0.35123	0.35123	0.37464	1.1235	0.82013	0.59318	0.59318	0.82013	0.92049	0.82013	0.82013	0.64425	0.811	0.811	0.811	0.811	0.74272	0.73399	0.4965	0.73399	0.54237	0.4965	0.73399	0.73043	0.54237	0.88045	0.88045	0.60301	0.63812	0.63812	0.47802	0.47802	0.85536	0.75233	1.193	1.193	0.89815	0.89815	1.2452	0.78421	0.78421	0.78421	0.78421
9	0.54777	0.63531	0.54777	0.63531	0.57647	0.57647	0.34926	0.34926	0.44562	0.42216	0.83621	0.60928	0.60928	0.83621	0.40348	0.83621	0.83621	0.78769	0.72486	0.72486	0.77066	0.77066	0.41192	0.44822	0.53771	0.44822	0.55468	0.53771	0.42148	0.6909	0.55468	1.0076	1.0076	0.61883	0.57493	0.57493	0.50306	0.50306	0.94229	0.78927	1.6179	1.6179	0.87453	0.87453	0.49738	0.43777	0.40812	0.40812	0.43777
10.5	1.028	0.60673	1.028	0.60673	0.63355	0.63355	0.41067	0.41067	0.42702	0.42808	0.92525	0.7093	0.7093	0.92525	0.55781	0.92525	0.92525	0.76678	0.54897	0.54897	0.44453	0.44453	0.51997	0.56068	0.57569	0.56068	0.60374	0.57569	0.43273	0.69018	0.60374	1.1393	1.1393	0.61537	0.57484	0.57484	0.53576	0.53576	1.1173	0.93619	2.1117	2.1117	1.3213	1.3213	0.57144	0.52334	0.45353	0.45353	0.52334
12	0.61373	0.68911	0.61373	0.68911	0.59416	0.59416	0.3704	0.3704	0.4247	0.46853	0.98367	0.76655	0.76655	0.98367	0.59712	0.98367	0.98367	0.46078	0.56358	0.56358	0.48574	0.48574	0.45547	0.58747	0.58019	0.58747	0.61006	0.58019	0.48542	0.74363	0.61006	1.1857	1.1857	0.67681	1.1237	1.1237	0.50835	0.50835	0.6329	1.4018	2.3115	2.3115	0.60465	0.60465	0.57266	0.63091	0.44511	0.44511	0.63091
13.5	0.66836	0.68815	0.66836	0.68815	0.68716	0.68716	0.37641	0.37641	0.48624	0.48524	1.4107	0.86587	0.86587	1.4107	0.69053	1.4107	1.4107	0.48072	0.65992	0.65992	0.55041	0.55041	0.49815	0.50246	0.58917	0.50246	0.59565	0.58917	0.46795	0.66535	0.59565	1.4284	1.4284	0.69883	0.55409	0.55409	0.5339	0.5339	0.81471	0.67572	1.184	1.184	0.73304	0.73304	0.60574	0.57339	0.47803	0.47803	0.57339
15	0.65516	0.70272	0.65516	0.70272	0.77043	0.77043	0.39898	0.39898	0.51414	0.48873	0.54459	1.2732	1.2732	0.54459	0.63346	0.54519	0.54519	0.54678	0.62272	0.62272	0.56089	0.56089	0.4972	0.55749	0.60572	0.55749	0.62681	0.60572	0.55859	0.58996	0.62681	1.653	1.653	0.75227	0.48435	0.48435	0.50434	0.50434	0.82106	0.76698	1.4381	1.4381	0.81863	0.81863	0.58059	0.55996	0.40436	0.40436	0.55996
16.5	0.65002	0.74009	0.65002	0.74009	0.82452	0.82452	0.45528	0.45528	0.54765	0.4925	0.69323	0.69332	0.69332	0.69323	0.61707	0.60803	0.60803	0.53562	0.67408	0.67408	0.61122	0.61122	0.54287	0.49812	0.62617	0.49812	0.57211	0.62617	0.54386	1.0878	0.57211	2.0942	2.0942	0.64411	0.64355	0.64355	0.56773	0.56773	0.9348	0.84392	1.4597	1.4597	0.89071	0.89071	0.67854	0.66635	0.43531	0.43531	0.66635
18	0.7064	0.71179	0.7064	0.71179	0.79605	0.79605	0.41946	0.41946	0.48946	0.50207	0.79829	0.83371	0.83371	0.79829	0.66125	0.72186	0.72186	0.55265	0.7404	0.7404	0.62972	0.62972	0.60812	0.60044	0.64578	0.60044	0.67994	0.64578	0.57261	1.2293	0.67994	0.99597	0.99597	0.80323	0.65136	0.65136	0.54798	0.54798	0.87424	0.90134	1.4272	1.4272	1.1001	1.1001	0.77824	0.76388	0.43319	0.43319	0.76388
19.5	0.66105	0.77646	0.66105	0.77646	0.7756	0.7756	0.59033	0.59033	0.60905	0.49471	0.9575	0.95576	0.95576	0.9575	0.69783	0.8911	0.8911	0.60685	0.75396	0.75396	0.64027	0.64027	0.54037	0.61422	0.74986	0.61422	0.6237	0.74986	0.59306	0.43305	0.6237	1.1448	1.1448	1.4965	0.68762	0.68762	0.60656	0.60656	0.95128	0.80319	1.3189	1.3189	1.255	1.255	0.80307	0.7452	0.43714	0.43714	0.7452
21	0.66604	0.78053	0.66604	0.78053	0.94745	0.94745	0.5369	0.5369	0.57096	0.55294	1.0051	0.99944	0.99944	1.0051	0.73581	1.0136	1.0136	0.61439	0.77179	0.77179	0.72596	0.72596	0.50297	0.57783	0.75212	0.57783	0.68756	0.75003	0.59234	0.43095	0.68756	1.1133	1.1133	0.61323	0.68818	0.68818	0.59571	0.59571	0.94406	0.81917	1.3261	1.3261	1.4477	1.4477	0.83555	0.76474	0.45156	0.45156	0.76474
22.5	0.74072	0.83453	0.74072	0.83453	0.91293	0.91293	0.3037	0.28869	0.57511	0.56222	1.06	1.0719	1.0719	1.06	0.80647	1.0844	1.0844	0.56884	0.798	0.798	0.82748	0.82748	0.52587	0.6316	0.9061	0.6316	0.68396	0.8213	0.5541	0.32412	0.68396	1.1001	1.1001	0.59512	0.63674	0.63674	0.64674	0.64674	0.92349	0.80337	1.2688	1.2688	1.4861	1.4861	0.91443	0.83218	0.46938	0.46938	0.83218
24	1.3219	0.8251	1.3219	0.8251	0.90736	0.90736	0.41212	0.36301	0.19326	0.56774	1.0825	1.2443	1.2443	1.0825	0.80732	1.1926	1.1926	0.59858	0.90713	0.90713	0.96213	0.96213	0.54357	0.61834	1.1899	0.61834	0.67587	0.86	0.52973	0.41238	0.67587	1.049	1.049	0.62293	0.6976	0.6976	0.67063	0.67063	0.94461	0.83012	1.1854	1.1854	1.4942	1.4942	0.95846	0.792	0.48276	0.48276	0.792
25.5	0.45629	0.33901	0.52616	0.35741	0.67698	0.54801	0.36143	0.37447	0.37563	0.6639	1.0785	1.4127	1.4127	1.0785	0.8222	1.3203	1.3203	0.6063	1.0228	1.0228	1.1848	1.1848	0.52139	0.67691	1.6099	0.67691	0.69541	0.82789	0.66651	0.4672	0.69541	1.1241	1.1241	0.56016	0.74154	0.74154	0.73007	0.73007	0.98343	0.86171	1.2384	1.2384	1.5692	1.5692	0.99557	0.82039	0.59028	0.59028	0.82039
27	0.50845	0.46981	0.50045	0.53877	0.76335	0.58405	0.42823	0.43459	0.4025	0.69163	1.1305	1.5381	1.5381	1.1305	0.77861	1.297	1.297	0.61994	1.1129	1.1129	1.4769	1.4769	0.58589	0.73362	2.1552	0.73362	0.71734	1.0058	0.60243	0.42516	0.71734	1.0238	1.0238	0.59785	0.73695	0.73695	1.2258	1.2258	1.0625	0.94034	1.2514	1.2514	1.5023	1.5023	1.0655	1.3369	0.66526	0.66526	1.3369
28.5	0.50106	0.51214	0.58253	0.52366	1.1223	0.57676	0.4415	0.4641	0.51043	0.88067	1.1451	1.692	1.692	1.1451	0.9185	1.4565	1.4565	0.60278	0.6621	0.54916	2.2517	2.2517	1.0463	0.77874	3.7101	0.77874	0.74965	0.51792	0.54119	0.46772	0.74965	1.1937	1.1937	0.60925	0.74861	0.74861	0.53082	0.51849	1.2094	0.94385	1.1901	1.1901	1.5238	1.5238	1.4258	0.54508	0.73434	0.73434	0.49001
30	0.57537	0.51917	0.55451	0.51484	0.70114	0.61314	0.51867	0.44906	0.55322	0.46458	1.1869	1.792	1.792	1.1869	0.87915	1.3884	1.3884	0.60661	0.9014	0.77392	1.1585	1.0828	0.36995	0.73921	3.2039	0.73921	1.1559	0.55087	0.46897	0.52128	1.1559	1.3638	1.3638	0.55138	0.83502	0.83502	0.67407	0.62237	1.3246	1.0357	1.088	1.088	1.4111	1.4111	0.5729	0.57867	0.44869	0.39109	0.46064
31.5	0.56161	0.57804	0.55337	0.5118	0.68524	0.54276	0.50445	0.46825	0.52706	0.43514	1.2519	1.9731	1.9731	1.2519	0.91962	1.418	1.418	0.56622	0.84878	0.81477	1.3653	1.2629	0.41372	1.0135	3.6191	1.0135	0.5297	0.53399	0.46847	0.66592	0.56899	1.4092	1.4092	0.59518	0.87994	0.87994	0.78241	0.70471	1.452	1.3801	1.1688	1.1688	1.9936	1.9936	0.63507	0.64488	0.51351	0.50869	0.46661
33	0.54266	0.56626	0.55584	0.51524	0.72441	0.54696	0.42885	0.47166	0.54998	0.49003	1.2378	2.0278	2.0278	1.2378	0.91098	1.2792	1.2792	0.58412	0.89496	0.91678	1.5159	1.377	0.46348	0.45966	4.2432	0.34531	0.55639	0.45017	0.47666	0.89552	0.66709	1.5116	1.5116	0.72367	0.84584	0.84584	0.80967	0.79214	1.6749	0.60914	1.1069	1.1069	0.81387	0.67318	0.50983	0.65371	0.54214	0.58451	0.45075
34.5	0.60294	0.54539	0.55181	0.55216	0.74646	0.61944	0.47353	0.45824	0.57043	0.46184	1.3918	2.0977	2.0977	1.3918	0.42911	1.3411	1.3411	1.0778	1.0159	0.91632	1.5803	1.4376	0.4649	0.47515	4.8328	0.5339	0.57082	0.60911	0.60279	0.59297	0.66018	1.9346	1.9346	0.63416	1.2694	1.2694	0.90605	0.96637	0.86777	0.65995	1.4446	1.4446	0.93947	0.70901	0.56799	0.68711	0.60038	0.54107	0.44091
36	0.6468	0.57263	0.54028	0.48049	0.72583	0.60842	0.48255	0.48748	0.57829	0.49339	1.3385	2.1068	2.1068	1.3385	0.59408	1.1287	1.1287	0.394	0.88641	0.88031	1.5653	1.4023	0.51757	0.44717	5.2159	0.52284	0.58801	0.57331	0.55169	0.63278	0.63078	2.5508	2.5508	0.65483	0.54049	0.55158	0.90008	0.89471	0.92163	0.66157	0.73097	0.73306	0.98309	0.75682	0.53359	0.64448	0.64932	0.56283	0.44962
37.5	0.63938	0.62496	0.5846	0.52572	0.77794	0.56275	0.48849	0.48058	0.5926	0.479	1.8233	2.0787	2.0787	1.8233	0.62899	0.60678	0.60829	0.40583	0.83713	0.83412	1.5943	1.4022	0.47799	0.44495	4.5388	0.50614	0.63561	0.55802	0.49162	0.66796	0.64704	3.1327	3.1327	0.62606	0.57809	0.51521	0.86734	0.94614	0.85304	0.67515	0.86203	0.76672	1.1065	0.82208	0.5534	0.68426	0.68826	0.61729	0.54417
39	0.69364	0.6385	0.56858	0.54821	0.75586	0.54406	0.52764	0.47553	0.56651	0.44338	0.77346	1.2838	1.2959	0.71005	0.70562	0.70512	0.65628	0.43661	0.93814	0.84602	1.5602	1.3432	0.51087	0.47758	2.5648	0.55154	0.71119	0.57443	0.55738	0.68499	0.71281	2.399	2.0246	0.50555	0.63986	0.54528	0.99269	0.95935	0.84677	0.68801	0.77639	0.66239	1.2969	0.92421	0.64015	0.66377	0.72293	0.67599	0.47306
[truncated: 51 more columns]

## Sheet: Fig2S3B_GFP_high
1.5	118.63	118.68	159.82	159.82	144.02	93.62	93.62	119.25	123.33	123.33	91.208	168.78	168.78	91.531	91.531	103.66	103.66	96.967	96.967	59.57	59.57	59.57	59.57	149.59	149.59	149.59	148.05	148.05	121.09	121.09	144.03	150.38	144.03	150.38	150.38	150.38	82.808	82.808	82.808	82.808	181.62	167.49	167.49	92.289	92.289	158.72	138.74	138.74	155.18
3	134.7	133.6	172.08	172.08	160.62	104.55	104.55	146.69	140.94	140.94	109.54	180.63	180.63	104.44	104.44	118.49	118.49	109.36	109.36	70.592	70.592	70.592	70.592	169.53	169.53	169.53	85.357	85.357	130.99	130.99	159.9	164.83	159.9	164.83	164.83	164.83	96.652	96.652	96.652	96.652	195.98	174.27	174.27	107.37	107.37	69.732	155.56	155.56	92.633
4.5	149.75	149.62	183.13	183.13	175.73	112.72	112.72	175.87	160.79	160.79	124.42	195.76	195.76	119.51	119.51	131.63	131.63	124.32	124.32	82.605	82.605	82.605	82.605	187.61	187.61	187.61	90.369	90.369	151.75	151.75	176.04	187.16	176.04	187.16	187.16	187.16	109.41	109.41	109.41	109.41	215.71	191.13	191.13	123.64	123.64	85.715	184.26	184.26	106.06
6	168.31	167.43	193.77	193.77	91.28	123.23	123.23	197.93	179.2	179.2	132.93	213.46	213.46	133.82	133.82	144.7	144.7	138.52	138.52	96.912	96.912	96.912	96.912	199.58	199.58	199.58	96.201	96.201	173.24	173.24	196.49	209.43	196.49	209.43	209.43	209.43	122.95	122.95	122.95	122.95	238.24	209.64	209.64	140.44	140.44	92.578	205.08	205.08	118.06
7.5	78.873	79.307	205.06	205.06	99.343	133.35	133.35	186.73	195.33	195.33	69.648	232.06	232.06	151.91	151.91	159.8	159.8	153.74	153.74	118.97	118.97	118.97	118.97	102.19	102.19	102.19	108.29	108.29	191.31	191.31	217.85	232.12	217.85	232.12	232.12	232.12	139.07	139.07	139.07	139.07	126.77	235.2	235.2	151.86	151.86	101.33	228.78	228.78	131.74
9	97.834	97.655	216.74	216.74	105.71	146.09	146.09	109.85	193.79	193.79	73.427	251.09	251.09	172.57	172.57	175.81	175.81	172.34	172.34	141.68	141.68	141.68	141.68	108.11	108.11	108.11	119.21	119.21	210.37	210.37	243.41	251.83	243.41	251.83	251.83	251.83	153.45	153.45	153.45	153.45	134.07	255.38	255.38	167.72	167.72	116.97	122.23	113.38	148.08
10.5	106.78	107.1	228.61	228.61	117.72	162.49	162.49	120.68	91.6	91.6	81.114	136.98	136.98	197.4	197.4	101.12	101.12	84.894	84.894	178.33	178.33	178.33	178.33	118.99	118.99	118.99	132.79	132.79	233.04	233.04	116.54	275.98	111.61	275.98	275.98	275.98	157.03	157.03	157.03	157.03	140.4	195.06	195.06	188.95	188.95	134.21	138.68	128.07	159.54
12	122.33	121.86	242.23	242.23	130.36	177.17	177.17	128.47	106.42	106.42	95.601	149.07	149.07	223.49	223.49	109.9	109.9	100.71	100.71	98.767	98.767	93.097	93.097	129.18	129.18	129.18	147.77	147.77	256.96	256.96	138.68	120.51	131.13	129.16	120.51	129.16	81.368	81.368	94.608	94.608	146.03	220.78	220.78	212.8	212.8	151.19	149.18	134.88	172.04
13.5	145.05	144.16	251.85	251.85	146.05	91.038	91.038	145.66	110.32	110.32	116.97	159.67	159.67	253.36	253.36	124.43	124.43	110.91	110.91	112.23	112.23	105.95	105.95	148.53	148.53	148.53	168.36	168.36	291.23	291.23	144.78	142.67	142.23	158.38	142.67	158.38	87.674	87.674	101.91	101.91	157.05	118.03	118.03	243.18	243.18	173.12	169.2	147.13	182.09
15	160.12	160.53	117.41	144.76	157.66	98.179	98.179	161.7	112.95	112.95	134.47	171.96	171.96	279.22	279.22	137.49	137.49	120.8	120.8	124.66	124.66	117.79	117.79	164.69	164.69	164.69	183.24	183.24	145.69	145.69	148.79	151.6	152.17	162.1	151.6	162.1	93.76	93.76	107.5	107.5	163.54	119.79	119.79	265.54	265.54	191.66	187.33	165.43	189.35
16.5	178.68	177.93	127.55	154.98	172.32	104.99	104.99	175.31	118.97	118.97	151.86	188.61	188.61	149.37	149.37	154.01	154.01	134.38	134.38	140.85	140.85	134.5	134.5	183.59	183.59	183.59	199.46	199.46	151.41	151.41	152.62	163.63	162.22	164.69	163.63	164.69	104.9	104.9	115.63	115.63	172.96	128.24	128.24	284.82	284.82	211.97	204.9	182.58	200.91
18	191.62	191.89	134.82	158.17	184.58	113.68	113.68	195.2	126.77	126.77	174.1	205.92	205.92	160.07	160.07	168.56	168.56	148.05	148.05	157.19	157.19	152.25	152.25	202.86	202.86	202.86	217.15	217.15	161.33	161.33	161.97	175.76	175.16	166.72	175.76	166.72	118.03	118.03	132.54	132.54	181.67	136.61	136.61	138.99	138.99	232.83	223.49	202.35	220.94
19.5	201.61	201.65	134.82	163.54	196.66	119.86	119.86	212.31	139.23	139.23	197	219.15	219.15	168.59	168.59	186.56	186.56	159.99	159.99	171.09	171.09	170.22	170.22	226.19	226.19	226.19	237.06	237.06	172.79	172.79	165.42	184.53	187.86	171.08	184.53	171.08	135.24	135.24	152.36	152.36	193	142.33	142.33	148.79	148.79	255.8	237.73	219.83	237.32
21	213.76	213.41	144.93	168.08	208.14	128.85	128.85	227.4	155.25	155.25	220.63	233.02	233.02	172.47	172.47	207.16	207.16	170.27	170.27	187.92	187.92	184.42	184.42	251.03	251.03	251.03	255.79	255.79	185.43	185.43	167.44	192.96	200.97	175.46	192.96	175.46	149.53	149.53	168.22	168.22	207.72	152.93	152.93	153.48	153.48	264.54	251.86	233.84	252.59
22.5	234.94	234.56	150.8	171.43	223.1	136.74	136.74	252.34	171.68	171.68	244.23	248.27	248.27	177.13	177.13	232.42	232.42	180.35	180.35	202.86	202.86	202.47	202.47	280.03	280.03	280.03	275.79	275.79	196.29	196.29	176.33	200.84	218.1	182.87	200.84	182.87	163.16	163.16	183.24	183.24	219.9	162.19	162.19	159.83	159.83	359.88	270.31	250.78	249.22
24	255.31	255.19	156.07	176.09	241.56	147.29	147.29	275.62	189.11	189.11	269.76	264.16	264.16	183.05	183.05	257.25	257.25	189.5	189.5	221.25	221.25	225.73	225.73	312.15	312.15	312.15	293.33	293.33	207.34	207.34	186.73	209.26	234.35	200.89	209.26	200.89	178.28	178.28	201.6	201.6	229.81	172.14	172.14	165.38	165.38	271.01	283.31	271.58	130.03
25.5	276.98	275.79	160.96	181.04	259.74	159.04	159.04	300.75	212.77	212.77	279.87	282.24	282.24	188.42	188.42	287.46	287.46	201.82	201.82	241.32	241.32	253.64	253.64	168.11	148.46	168.11	309.93	309.93	216.62	216.62	200.55	223.76	257.74	218.95	223.76	218.95	190.32	190.32	224.49	224.49	237.97	179.53	179.53	173.11	173.11	159.75	301.18	292.27	136.46
27	287.59	288	165.92	185.35	277.89	166.04	166.04	321.23	239.78	239.78	135.09	303.08	303.08	195.33	195.33	318.06	318.06	212.37	212.37	262.23	262.23	283.53	283.53	210.56	174.2	210.56	330.82	330.82	224.51	224.51	216.61	244.64	283.6	237.01	244.64	237.01	215.14	215.14	244.44	244.44	132.65	183.97	183.97	177.94	177.94	163.28	325.07	313.61	143.27
28.5	290.88	286.76	175.88	193.27	291.49	183.73	183.73	349.51	256.98	256.98	139.46	323.48	323.48	208.86	208.86	334.97	334.97	224.54	224.54	285.57	285.57	312.33	312.33	205.3	187.49	223.46	349.87	349.87	232.17	232.17	230.19	267.78	309.95	251.64	267.78	251.64	236.23	236.23	263.41	263.41	143.8	195.51	195.51	186.11	186.11	171.02	344.83	334.4	151.85
30	273.99	272.7	189.65	199.82	265.82	201.4	201.4	372.16	280.36	280.36	144.31	312.66	312.66	227.72	227.72	176	183.78	240.28	240.28	304.28	304.28	341.67	341.67	213.39	197.26	234.3	321.79	321.79	250.01	250.01	243.71	294.98	340.47	268.34	294.98	268.34	250.99	250.99	274.41	274.41	146.38	214.39	214.39	194.9	194.9	175.35	363.48	349.38	159.68
31.5	147.77	147.24	205.65	205.43	147.99	220.26	220.26	361.12	141.83	140.5	151.7	167.3	191.42	253.47	253.47	202.41	210.33	252.29	252.29	287.61	287.61	373.65	373.65	230.87	210.33	239.35	163.55	182.11	261.14	261.14	253.05	318.21	371.65	286.87	318.21	286.87	267	267	135.55	146.79	153.12	223.96	223.96	208.78	208.78	183.95	182.08	174.7	167.32
33	154.79	154.44	217.72	209.71	152.94	234.81	234.81	193.2	154.21	149.25	161.23	177.87	202.74	280.32	280.32	213.44	223.5	132.34	129.22	164.12	157.09	409.35	409.35	244.52	218.91	235.72	171.03	193.84	278.36	278.36	114.08	360.48	402.11	133.43	360.48	140.33	250.56	250.56	139.8	154.9	159.94	237.76	237.76	223.26	223.26	191.67	193.47	189.33	176.74
34.5	159.79	159.02	235.18	212.35	158.73	261.22	261.22	206.58	158.68	155.3	170.94	186.38	209.05	309.34	309.34	220.61	237.16	136.11	135.8	169.12	160.89	211.54	207.71	269.87	231.41	245.08	171.83	194.45	288.33	288.33	144.82	197.52	444.95	136.67	148	141.24	149.26	139.93	142.38	150.57	166.84	253.36	253.36	234.23	234.23	200.54	198.42	195.46	190.72
36	170.43	169.81	247.08	212.97	164.32	271.98	271.98	218.28	165.24	162.02	184.31	197.47	219.01	340.37	340.37	228.71	256.84	141.38	139.61	174.64	165.69	225.62	216.54	291.94	246.85	259.08	182.87	204.82	311.86	311.86	148.39	200.07	207.78	138.06	151.72	144.55	159.36	146.48	147.54	156.93	176.06	273.38	273.38	249.57	249.57	206.73	203.05	201.73	201.04
37.5	179.6	179.13	221.31	175.65	164.55	291.25	291.25	224.84	171.16	171.69	199.6	211.71	230.36	366.22	366.22	241.53	278.04	143.5	146.18	177.41	172.6	235.05	224.54	313.83	260.78	278.14	189.57	212.47	156.25	142.64	151.37	204.47	215.77	145.35	158.1	144.41	168.6	148.65	153.15	162.14	185.31	288.32	288.32	266.59	266.59	215.41	209.68	205.45	212.48
39	189.6	189.06	119.2	93.206	167.47	137.69	137.05	237.11	176.48	185.7	216.13	228.68	243.56	146.96	147.85	251.73	297.08	145.54	151.44	188.61	179.83	249.85	238.17	332.9	276.91	295.81	202.92	225.17	159.57	145.29	152.54	209.38	222.35	156.67	164.32	145.79	166.44	150.72	161.51	169.37	191.08	128.35	156.65	98.709	109.96	223.64	214.61	212.84	225.56
[truncated: 51 more columns]

## Sheet: Fig2S3B_GFP_low
1.5	151.88	158.72	151.88	158.72	158.72	158.72	178.35	178.35	178.35	68.434	135.79	96.075	96.075	135.79	177.73	135.79	135.79	137.13	96.739	96.739	96.739	96.739	113.81	86.934	192.44	86.934	192.44	192.44	86.934	72.324	192.44	52.413	52.413	73.882	89.397	89.397	85.526	85.526	74.1	133.2	134.79	134.79	130.24	130.24	162.39	112.84	112.84	112.84	112.84
3	167.26	182.22	167.26	182.22	182.22	182.22	87.17	87.17	96.761	86.716	147.32	109.92	109.92	147.32	202.44	147.32	147.32	159.46	114.3	114.3	114.3	114.3	123.56	102.4	110.23	102.4	98.723	110.23	102.4	79.727	98.723	62.646	62.646	77.977	107.28	107.28	100.33	100.33	85.027	146.32	150.71	150.71	145.66	145.66	184.68	131.28	131.28	131.28	131.28
4.5	176.32	99.966	176.32	99.966	93.04	93.04	93.457	93.457	102.18	105.74	159.13	127.31	127.31	159.13	227.75	159.13	159.13	177.37	126.76	126.76	126.76	126.76	136.11	120.31	114.35	120.31	102.8	114.35	120.31	89.696	102.8	77.282	77.282	83.955	126.49	126.49	116.11	116.11	97.539	160.94	165.43	165.43	162.84	162.84	206.36	150.57	150.57	150.57	150.57
6	89.021	108.77	89.021	108.77	101.33	101.33	103.26	103.26	112.84	126.96	171.97	147.33	147.33	171.97	251.27	171.97	171.97	192.69	143.64	143.64	143.64	143.64	149.42	139.15	124.4	139.15	109.15	124.4	139.15	102.09	109.15	94.738	94.738	92.995	150.66	150.66	119.02	119.02	110.33	175.12	184.05	184.05	181.88	181.88	222.36	171.69	171.69	171.69	171.69
7.5	97.36	117.58	97.36	117.58	110.62	110.62	113.98	113.98	124.83	145.54	189.3	169.68	169.68	189.3	269.77	189.3	189.3	205.66	162.15	162.15	162.15	162.15	158.69	151.6	128.45	151.6	116.95	128.45	151.6	112.49	116.95	111.36	111.36	96.927	174.83	174.83	70.465	70.465	122.05	189.93	201.45	201.45	198.08	198.08	208.33	189.4	189.4	189.4	189.4
9	104.52	130.43	104.52	130.43	121.5	121.5	129.11	129.11	139.55	77.478	209.61	197.62	197.62	209.61	126.81	209.61	209.61	218.72	92.812	92.812	76.09	76.09	81.258	81.691	139.66	81.691	131	139.66	83.116	129.21	131	133.73	133.73	106.1	206.07	206.07	75.388	75.388	137.37	211.13	224.07	224.07	215.95	215.95	123.47	102.2	94.216	94.216	102.2
10.5	119.45	144.17	119.45	144.17	135.16	135.16	140.68	140.68	152.99	84.235	234.42	225.92	225.92	234.42	139.36	234.42	234.42	231.61	100.87	100.87	89.596	89.596	86.105	89.487	148.65	89.487	141.62	148.65	89.056	148.65	141.62	150.8	150.8	113.77	233.98	233.98	81.66	81.66	151.58	233.11	249.94	249.94	198.67	198.67	133.34	109.87	102.65	102.65	109.87
12	135.05	156.41	135.05	156.41	148.92	148.92	151.11	151.11	165.87	89.467	256.23	253.88	253.88	256.23	145.08	256.23	256.23	115.52	109.85	109.85	97.698	97.698	91.825	94.372	155.36	94.372	153.43	155.36	93.558	175.11	153.43	166.29	166.29	126.35	267.34	267.34	91.881	91.881	77.078	269.36	272.42	272.42	120.48	120.48	143.91	116.85	104.17	104.17	116.85
13.5	153.66	171	153.66	171	168.75	168.75	172.27	172.27	188.29	96.798	266.88	290.63	290.63	266.88	153.69	266.88	266.88	123.37	126.38	126.38	107.06	107.06	107.47	105.68	166.94	105.68	161.14	166.94	102.6	210.37	161.14	182.87	182.87	140.66	137.72	137.72	108.56	108.56	84.242	133.58	130.82	130.82	130.02	130.02	161.79	125.46	120.93	120.93	125.46
15	163.64	179.12	163.64	179.12	182.05	182.05	190.33	190.33	204.44	107.4	139.41	299.55	299.55	139.41	161.64	152.44	152.44	133.56	143.84	143.84	119.29	119.29	123.26	122.4	177.87	122.4	172.77	177.87	115.21	242.26	172.77	201.66	201.66	161.7	144.88	144.88	120.82	120.82	90.049	142.74	156.93	156.93	136.78	136.78	171.41	133.4	133.88	133.88	133.4
16.5	178.84	190.37	178.84	190.37	200.73	200.73	208.78	208.78	218.32	118.29	147.65	165.83	165.83	147.65	167.56	159.34	159.34	149	161.68	161.68	132.58	132.58	134.83	132.94	188.86	132.94	172.88	188.86	124.31	239.79	172.88	215.03	215.03	176.02	158.86	158.86	136.61	136.61	99.259	157.36	163.24	163.24	145.54	145.54	187.41	142.62	145.91	145.91	142.62
18	193.14	199.01	193.14	199.01	220.24	220.24	227.96	227.96	230.51	129.27	155.05	175.38	175.38	155.05	171.93	168.21	168.21	167.08	180	180	148.2	148.2	149.82	148.15	201.83	148.15	181.68	201.83	138.12	259.28	181.68	106.09	106.09	200.12	173.86	173.86	148.58	148.58	110.75	175.06	176.13	176.13	158.62	158.62	198.96	149.79	157.1	157.1	149.79
19.5	208.07	212.31	208.07	212.31	240.16	240.16	247.69	247.69	251.27	144.97	163.26	189.75	189.75	163.26	177.2	177.38	177.38	184.51	199.89	199.89	163.84	163.84	168.92	159.41	212.4	159.41	184.82	212.4	146.82	156.61	184.82	109.82	109.82	205.73	191.24	191.24	162.76	162.76	123.23	193.51	184.87	184.87	171.79	171.79	206.14	161.03	171.3	171.3	161.03
21	216.22	222.1	216.22	222.1	256.08	256.08	266.97	266.97	267.35	160.18	171.74	205.14	205.14	171.74	182.48	188.72	188.72	204.28	222.37	222.37	183.32	183.32	189.77	171.63	159.35	171.63	193.53	227.82	158.55	171.79	193.53	120.59	120.59	119.53	209.9	209.9	181.91	181.91	132.8	210.36	194.1	194.1	183.44	183.44	215.36	173.48	195.2	195.2	173.48
22.5	229.16	233.22	229.16	233.22	265.18	265.18	133.84	145.83	280.59	175.49	180.29	218.09	218.09	180.29	189.34	199.07	199.07	224.09	245.09	245.09	202.07	202.07	213.5	182.66	142.9	182.66	193.95	241.61	171.28	175.03	193.95	132.4	132.4	126.79	225.23	225.23	205.04	205.04	144.96	226.46	205.27	205.27	188.92	188.92	229.04	190.94	218.9	218.9	190.94
24	240.13	244.13	240.13	244.13	265.92	265.92	147.4	159.73	128.4	192.24	189.24	229.7	229.7	189.24	196.42	209.04	209.04	245.45	273.59	273.59	218.8	218.8	236.43	193.77	149.46	193.77	201.6	253.93	186.66	192.97	201.6	147.84	147.84	130.91	241.35	241.35	234.57	234.57	158.77	249.62	214.57	214.57	197.33	197.33	245.82	211.34	247.3	247.3	211.34
25.5	134.05	112.52	127.01	111.37	145.62	124.07	153.04	166.92	147.16	212.16	200.65	238.49	238.49	200.65	201.97	219.24	219.24	273.73	292.54	292.54	240.89	240.89	264.13	210.1	157.74	210.1	204.1	261.25	207.46	209.48	204.1	166.03	166.03	132.64	257.68	257.68	266.23	266.23	173.99	277.73	229.66	229.66	206.82	206.82	267.18	236.76	280.59	280.59	236.76
27	147.5	130.05	136.45	126.78	146.62	125.43	162.11	179.1	150	230.55	211.22	247.91	247.91	211.22	206.03	226.26	226.26	298.88	315.37	315.37	262.21	262.21	290.4	223.31	207.18	223.31	209.31	210	220.4	226.43	209.31	179.15	179.15	138.5	272.11	272.11	278.12	278.12	189.47	308.84	247.17	247.17	217.99	217.99	285.31	242.34	313.81	313.81	242.34
28.5	155.39	133.73	144.92	128.93	150.48	124.95	171.07	191.49	157.34	232.03	222.23	254.06	254.06	222.23	212.56	234.92	234.92	319.8	164.03	143.28	258.69	258.69	295.89	231.99	284.64	231.99	217.95	126.62	215.64	251.32	217.95	199.86	199.86	146.28	283.09	283.09	154.55	159.66	210.15	338.68	267.89	267.89	237.6	237.6	263.68	148.78	351.36	351.36	134.88
30	166.64	139.62	153.77	131.79	154.02	125.02	179.7	205.4	166.53	118.71	232.97	260.02	260.02	232.97	220.26	244.82	244.82	344.08	182.92	161.44	153.05	137.58	172.18	236.35	183.97	236.35	206.18	123.34	125.61	267.26	206.18	211.57	211.57	151.5	296.62	296.62	167.05	170.56	231.52	372.03	294.28	294.28	247.83	247.83	149.21	161.64	179.39	175.66	144.31
31.5	175.14	146.85	163.76	132.25	158.66	122.88	189.24	218.42	175.16	139.52	245.21	272.24	272.24	245.21	229.73	256.14	256.14	374.62	184.63	170.38	163.04	144.84	184.7	209.86	191.12	209.86	111.22	126.54	136.2	340.76	110.81	225.75	225.75	230.31	313.63	313.63	173.4	177.57	250.63	418.62	319.75	319.75	247.44	247.44	155.47	174.69	204.6	195.01	152.91
33	184.87	152.33	172.91	133.06	161.83	120.41	195.27	237.58	184.72	140.33	261.74	286.93	286.93	261.74	239.88	266.31	266.31	395.48	190.03	179.41	170.82	153.17	194.17	102.66	206.19	106.1	113.14	132.53	142.33	443.25	114.58	239.65	239.65	260.5	327.83	327.83	180.68	188.98	281.48	195.22	348.1	348.1	144.12	127.64	156.34	189.27	220.75	215.68	166.01
34.5	198.95	159.67	183.97	136.03	166.71	123.3	197.32	249.53	193.56	147.22	280.51	302.62	302.62	280.51	105.21	278.06	278.06	427.33	198.55	188.34	176.01	158.39	203.33	112	220.06	134.76	116.46	140.65	151.44	347	116.84	246.21	246.21	268.96	340.14	340.14	184.38	196.96	137.19	204.2	376.09	376.09	156.69	132.76	168.15	203.2	238.32	226.1	176.75
36	214.22	168.49	195.76	138.38	172.56	125.21	204.29	255.05	201.4	151.96	293.91	321.38	321.38	293.91	133.14	281.4	281.4	210.13	199.37	198.29	182.52	169.29	209.62	110.51	221.46	134.94	121.61	140.48	155.98	376.03	118.96	247	247	286.56	179.78	163.49	190.47	202.27	142.28	214.19	187.98	189.63	163.98	145.9	178.88	215.41	250.96	240.6	185.42
37.5	230.34	177.46	204.38	140.84	180.11	129.45	212.05	268.56	209.68	159.02	289.86	336.68	336.68	289.86	136.39	137.61	140.75	219.23	200.97	211.02	189.29	179.33	211.74	116.39	225.58	141.37	131.52	144.23	164.97	203.04	126.17	256.09	256.09	306.09	185.99	168.55	193.99	209.45	142.3	229.97	194.2	194.73	171.77	149.89	192.01	230.97	273.44	265.02	202.58
39	248.55	186.96	214.18	145.06	187.95	135.31	224.72	279.86	237.79	167.17	151.98	161.58	176.32	153.35	139.93	141.05	147.49	226.27	209.74	225.88	196.22	190.69	227.44	123.58	113.71	147.94	141.26	147.42	171.09	221.5	132.08	137.98	119.03	133.42	192.66	172.61	202.44	216.78	150.78	244.91	203.07	192.78	182.22	165.37	200.64	247	288.88	283.97	213.72
[truncated: 51 more columns]

## Sheet: Fig2S3C
time (hr)	GFP-raw	GFP-normalized	mRuby-raw	mRuby-normalized	denominator
1.5	121.09	82.564	0.51829	0.35338	1.4667
3	130.99	85.431	0.66526	0.43387	1.5333
4.5	151.75	94.844	0.88748	0.55467	1.6
6	173.24	103.94	1.3499	0.80996	1.6667
7.5	191.31	110.37	1.932	1.1146	1.7333
9	210.37	116.87	2.7721	1.5401	1.8
10.5	233.04	124.85	3.9014	2.09	1.8667
12	256.96	132.91	5.4135	2.8001	1.9333
13.5	291.23	145.61	8.0973	4.0486	2
15	145.69	136.59	4.6518	4.361	1.0667
16.5	151.41	133.6	5.288	4.6658	1.1333
18	161.33	134.45	5.7495	4.7913	1.2
19.5	172.79	136.41	6.3163	4.9866	1.2667
21	185.43	139.07	6.8377	5.1282	1.3333
22.5	196.29	140.21	7.217	5.155	1.4
24	207.34	141.37	8.2204	5.6048	1.4667
25.5	216.62	141.28	8.9458	5.8342	1.5333
27	224.51	140.32	9.9121	6.195	1.6
28.5	232.17	139.3	10.61	6.3658	1.6667
30	250.01	144.24	11.673	6.7345	1.7333
31.5	261.14	145.08	12.726	7.0697	1.8
33	278.36	149.12	14.168	7.5898	1.8667
34.5	288.33	149.14	15.016	7.7669	1.9333
36	311.86	155.93	17.329	8.6644	2
37.5	142.64	133.72	8.2273	7.7131	1.0667
39	145.29	128.2	8.6423	7.6256	1.1333
