# Supplementary material for: Quantitative control of noise in mammalian gene expression by dynamic histone regulation
Source: eLife. 2021 Aug 11;10:e65654. doi: 10.7554/eLife.65654 (PMC8357418; doi:10.7554/eLife.65654)
Supplement: Figure 2—source data 1. [file elife-65654-fig2-data1.xlsx]

## Sheet: Fig2A
power	control	LMK	Vor	PF
1	9.2051e-05	0	0.00031425	0
1.1	0	0	5.2375e-05	0
1.2	0	0	0	0
1.3	0	0	0	4.1439e-05
1.4	0.00023013	0	5.2375e-05	4.1439e-05
1.5	9.2051e-05	0	0.00031425	0
1.6	9.2051e-05	0	0.00026188	0.00029007
1.7	0.00023013	0	0.0006285	0.00012432
1.8	0.00046026	0	0.00052375	0.00037295
1.9	0.0010586	0	0.0015713	0.0007459
2	0.0023013	0.0002061	0.0026188	0.0019476
2.1	0.0058453	0.00051525	0.0072278	0.003688
2.2	0.011506	0.0012366	0.012884	0.0075004
2.3	0.022921	0.0015458	0.025245	0.013923
2.4	0.039306	0.0045342	0.044781	0.025195
2.5	0.04644	0.0080379	0.060022	0.031079
2.6	0.048189	0.012057	0.071021	0.038207
2.7	0.045888	0.01453	0.060074	0.040859
2.8	0.039076	0.018858	0.050123	0.04235
2.9	0.039996	0.014839	0.045043	0.041232
3	0.03498	0.015767	0.040538	0.04206
3.1	0.038616	0.018034	0.043367	0.049602
3.2	0.042067	0.021228	0.040643	0.055569
3.3	0.044185	0.021434	0.040643	0.055528
3.4	0.04331	0.019889	0.037658	0.054989
3.5	0.04377	0.02432	0.038443	0.056813
3.6	0.044461	0.02669	0.037501	0.056978
3.7	0.044783	0.03277	0.035929	0.052544
3.8	0.045289	0.038129	0.037396	0.051798
3.9	0.044231	0.044621	0.038129	0.052171
4	0.042528	0.049979	0.032892	0.04492
4.1	0.04262	0.056059	0.032158	0.041356
4.2	0.039674	0.066364	0.03153	0.035016
4.3	0.03995	0.078112	0.032054	0.034063
4.4	0.035348	0.082543	0.029906	0.026811
4.5	0.027017	0.082955	0.026607	0.018482
4.6	0.019607	0.085016	0.017336	0.012473
4.7	0.012151	0.063376	0.01168	0.0058843
4.8	0.0069959	0.050804	0.007542	0.0033151
4.9	0.0028996	0.026896	0.0034044	0.0013675
5	0.0011506	0.013706	0.0016236	0.00041439
5.1	0.00046026	0.0038129	0.0002095	0.00020719
5.2	9.2051e-05	0.0010305	5.2375e-05	0
5.3	9.2051e-05	0	0	4.1439e-05
5.4	0	0.00010305	0	0
5.5	0	0	0	0
5.6	0	0	0	0
5.7	0	0	0	0
5.8	0	0	0	0
5.9	0	0	0	0
6	0	0	0	0
6.1	0	0	0	0
6.2	0	0	0	0
6.3	0	0	0	0
6.4	0	0	0	0
6.5	0	0	0	0
6.6	0	0	0	0
6.7	0	0	0	0
6.8	0	0	0	0
6.9	0	0	0	0
7	0	0	0	0
7.1	0	0	0	0
7.2	0	0	0	0
7.3	0	0	0	0
7.4	0	0	0	0
7.5	0	0	0	0
7.6	0	0	0	0
7.7	0	0	0	0
7.8	0	0	0	0
7.9	0	0	0	0
8	0	0	0	0

## Sheet: Fig2B
control	LMK
1.1136	3.043
0.88644	2.591
0.91971	2.1703
1.0803	2.1119

## Sheet: Fig2C
GFP-GAVPO	control	LMK	Vor	PF
135770	610.99	2785.2	389.12	453.44
235910	1490.9	6832.4	791.98	594.89
291760	2390.1	10064	1339.3	766.7
337350	3306.6	13012	1977.3	1039.8
376300	4326	15263	2336.8	1310.5
412520	5042	16766	2755.6	1482.3
445220	5550.2	17386	3756	1738.6
476720	6423.9	19709	3528.8	2111.6
508460	7033.5	20959	4623	2545.9
540040	7426.3	23016	5042.4	2917
572060	7989.8	23445	5189.7	3358.6
604800	9357.8	25663	6693.4	3600
639070	9935.8	27984	6667.6	3780.7
675870	10344	30331	7823.6	4614.9
715610	11463	32614	8383.8	5647.3
762640	12588	34685	9336.6	5810.6
819540	13535	39468	10847	6187.4
892280	15354	42601	11432	6753.5
1005400	18608	47900	14471	8018
1308800	29170	59163	22815	13830

## Sheet: Fig2G-mRuby-high
time (h)	cell 1	cell 2	cell 3	cell 4	cell 5	cell 6	cell 7	cell 8	cell 9	cell 10	cell 11	cell 12	cell 13	cell 14	cell 15	cell 16	cell 17	cell 18	cell 19	cell 20	cell 21	cell 22	cell 23	cell 24	cell 25	cell 26	cell 27	cell 28	cell 29	cell 30	cell 31	cell 32	cell 33	cell 34	cell 35	cell 36	cell 37	cell 38	cell 39	cell 40	cell 41	cell 42	cell 43	cell 44	cell 45	cell 46	cell 47	cell 48	cell 49
1.5	1.9104	1.9143	1.9104	1.9143	1.9143	1.9143	1.9502	1.9502	1.9502	1.5964	1.9665	1.8365	1.9665	2.0109	1.9665	1.9665	1.7467	1.7467	1.7467	1.7467	1.8173	1.7003	1.9833	1.7003	1.9833	1.9833	1.7003	1.7566	1.9833	1.5945	1.5945	1.7894	1.7657	1.7657	1.6768	1.6768	1.6657	1.6657	1.944	1.944	1.5114	1.9106	1.9106	1.9717	1.8136	1.8136	1.8136	1.8136	1.7455
3	1.9371	1.9596	1.9371	1.9596	1.9596	1.9596	1.9082	1.9082	1.9557	1.6828	1.9826	1.8747	1.9826	2.051	1.9826	1.9826	1.8028	1.8028	1.8028	1.8028	1.8366	1.755	2.0246	1.755	1.9721	2.0175	1.755	1.7767	1.9721	1.6508	1.6508	1.7893	1.8264	1.8264	1.7304	1.7304	1.7077	1.7077	1.974	1.974	1.5505	1.9415	1.9415	2.0111	1.8629	1.8629	1.8629	1.8629	1.8079
4.5	1.9453	1.9699	1.9453	1.9699	1.9387	1.9387	1.9085	1.9085	1.9514	1.7532	1.9976	1.9192	1.9976	2.0864	1.9976	1.9976	1.8319	1.8319	1.8319	1.8319	1.8628	1.8092	2.0235	1.8092	1.9685	2.0099	1.8092	1.8066	1.9685	1.7217	1.7217	1.7991	1.8802	1.8802	1.7786	1.7786	1.7503	1.7503	1.9968	1.9968	1.5352	1.9729	1.9729	2.0436	1.9067	1.9067	1.9067	1.9067	1.8511
6	1.9173	1.9785	1.9173	1.9785	1.9478	1.9478	1.9238	1.9238	1.9681	1.8174	2.0136	1.9642	2.0136	2.1138	2.0136	2.0136	1.871	1.871	1.871	1.871	1.8881	1.8572	2.0437	1.8572	1.9744	2.0242	1.8572	1.8426	1.9744	1.7909	1.7909	1.8223	1.9391	1.9391	1.7746	1.7746	1.7874	1.7874	2.0261	2.0261	1.552	2.0045	2.0045	2.0607	1.9484	1.9484	1.9484	1.9484	1.8934
7.5	1.9262	1.986	1.9262	1.986	1.9595	1.9595	1.9403	1.9403	1.9872	1.8619	2.0383	2.0078	2.0383	2.13	2.0383	2.0383	1.9089	1.9089	1.9089	1.9089	1.8995	1.8797	2.0418	1.8797	1.985	2.017	1.8797	1.8655	1.985	1.8426	1.8426	1.8201	1.9873	1.9873	1.818	1.818	1.8155	1.8155	2.0489	2.0489	1.5596	2.0258	2.0258	2.0177	1.9764	1.9764	1.9764	1.9764	1.9197
9	1.929	2.0062	1.929	2.0062	1.9754	1.9754	1.9696	1.9696	2.0121	1.8592	2.0661	2.0569	2.0661	2.0783	2.0661	2.0661	1.9354	1.9354	1.8514	1.8514	1.8799	1.8858	2.0629	1.8858	2.0158	2.0331	1.8897	1.9072	2.0158	1.9044	1.9044	1.8401	2.043	2.043	1.8193	1.8193	1.8516	1.8516	2.0793	2.0793	1.6091	2.048	2.048	2.0616	1.9773	1.9442	1.9442	1.9773	1.9292
10.5	1.9607	2.0262	1.9607	2.0262	1.9982	1.9982	1.9834	1.9834	2.0298	1.8675	2.0989	2.0987	2.0989	2.0958	2.0989	2.0989	1.9416	1.9416	1.8943	1.8943	1.877	1.9006	2.0753	1.9006	2.0319	2.0409	1.8917	1.9503	2.0319	1.9395	1.9395	1.8519	2.0829	2.0829	1.8277	1.8277	1.8796	1.8796	2.1115	2.1115	1.693	1.9971	1.9971	2.067	1.9787	1.9534	1.9534	1.9787	1.9311
12	1.9892	2.0394	1.9892	2.0394	2.0181	2.0181	1.9922	1.9922	2.0437	1.8673	2.1223	2.1336	2.1223	2.091	2.1223	2.1223	1.9506	1.9506	1.9056	1.9056	1.8786	1.9002	2.0802	1.9002	2.0497	2.0416	1.8868	2.0044	2.0497	1.9656	1.9656	1.8797	2.126	2.126	1.8541	1.8541	1.8589	1.8589	2.1342	2.1342	1.7507	2.0509	2.0509	2.0738	1.9774	1.9334	1.9334	1.9774	1.9324
13.5	2.0218	2.0569	2.0218	2.0569	2.0512	2.0512	2.0279	2.0279	2.0785	1.8767	2.1253	2.177	2.1253	2.0949	2.1253	2.1253	1.9852	1.9852	1.9205	1.9205	1.9221	1.9271	2.0976	1.9271	2.0546	2.0551	1.902	2.0677	2.0546	1.9911	1.9911	1.9093	2.111	2.111	1.903	1.903	1.8712	1.8712	2.0886	2.0886	1.8447	2.056	2.056	2.0998	1.982	1.9734	1.9734	1.982	1.9422
15	2.0268	2.0569	2.0268	2.0569	2.0639	2.0639	2.051	2.051	2.095	1.8984	2.118	2.1754	2.118	2.0966	2.1551	2.1551	2.0166	2.0166	1.944	1.944	1.9582	1.9697	2.1118	1.9697	2.0691	2.0656	1.9289	2.1132	2.0691	2.0183	2.0183	1.9534	2.1067	2.1067	1.9272	1.9272	1.8753	1.8753	2.1413	2.1413	1.895	2.0517	2.0517	2.1014	1.9838	1.9941	1.9941	1.9838	1.9574
16.5	2.0442	2.064	2.0442	2.064	2.087	2.087	2.0719	2.0719	2.105	1.9181	2.1181	2.1916	2.1181	2.0929	2.148	2.148	2.0438	2.0438	1.9676	1.9676	1.9749	1.9854	2.1249	1.9854	2.0541	2.0752	1.9396	2.0935	2.0541	2.0315	2.0315	1.9745	2.1218	2.1218	1.9594	1.9594	1.8941	1.8941	2.1336	2.1336	1.9459	2.0538	2.0538	2.1179	1.9894	2.0092	2.0092	1.9894	1.9731
18	2.0574	2.0648	2.0574	2.0648	2.1088	2.1088	2.0916	2.0916	2.1109	1.9354	2.1159	2.1896	2.1159	2.0856	2.1467	2.1467	2.0682	2.0682	1.9948	1.9948	1.9995	2.0131	2.1411	2.0131	2.0609	2.0883	1.9642	2.1127	2.0609	1.9957	1.9957	2.015	2.1375	2.1375	1.9757	1.9757	1.9194	1.9194	2.1432	2.1432	1.9908	2.0677	2.0677	2.1227	1.9884	2.0201	2.0201	1.9884	1.9923
19.5	2.0704	2.0751	2.0704	2.0751	2.1287	2.1287	2.1099	2.1099	2.1313	1.965	2.116	2.199	2.116	2.081	2.1462	2.1462	2.0925	2.0925	2.0181	2.0181	2.0314	2.0264	2.1511	2.0264	2.0541	2.0952	1.9705	2.1601	2.0541	1.9827	1.9827	2.0123	2.1566	2.1566	1.9959	1.9959	1.9446	1.9446	2.1419	2.1419	2.0309	2.0801	2.0801	2.1179	1.9986	2.0375	2.0375	1.9986	2.0049
21	2.0686	2.0777	2.0686	2.0777	2.1395	2.1395	2.1254	2.1254	2.1418	1.989	2.1168	2.2094	2.1168	2.0767	2.1509	2.1509	2.1186	2.1186	2.0476	2.0476	2.0626	2.0408	2.0144	2.0408	2.0603	2.1109	1.9846	2.1681	2.0603	1.997	1.997	2.0427	2.1759	2.1759	2.0258	2.0258	1.9569	1.9569	2.1419	2.1419	2.0574	2.0874	2.0874	2.1176	2.0108	2.0749	2.0749	2.0108	2.0283
22.5	2.0761	2.0825	2.0761	2.0825	2.1383	2.1383	2.0985	2.1358	2.147	2.0102	2.1177	2.2137	2.1177	2.0763	2.1529	2.1529	2.1415	2.1415	2.0714	2.0714	2.0953	2.0508	1.9555	2.0508	2.0479	2.1222	1.9996	2.1462	2.0479	2.0127	2.0127	2.0361	2.1863	2.1863	2.06	2.06	1.9756	1.9756	2.146	2.146	2.0832	2.08	2.08	2.1258	2.0331	2.1062	2.1062	2.0331	2.0496
24	2.0794	2.0866	2.0794	2.0866	2.1237	2.1237	2.1141	2.149	2.0805	2.032	2.1194	2.215	2.1194	2.0765	2.1539	2.1539	2.1708	2.1708	2.0882	2.0882	2.1219	2.06	1.9637	2.06	2.0518	2.13	2.0192	2.1605	2.0518	2.0372	2.0372	2.0201	2.197	2.197	2.1014	2.1014	1.9966	1.9966	2.1459	2.1459	2.1054	2.0796	2.0796	2.1388	2.0587	2.1414	2.1414	2.0587	2.0667
25.5	2.0992	2.0232	2.0758	2.0187	2.1352	2.0656	2.1056	2.1433	2.1134	2.0578	2.1263	2.2111	2.1263	2.0733	2.1553	2.1553	2.1822	2.1822	2.113	2.113	2.153	2.0794	1.9761	2.0794	2.0445	2.129	2.0481	2.1699	2.0445	2.0653	2.0653	1.9977	2.207	2.207	2.14	2.14	2.0187	2.0187	2.157	2.157	2.1168	2.0815	2.0815	2.158	2.0903	2.1792	2.1792	2.0903	2.0939
27	2.1144	2.0597	2.0806	2.0487	2.1118	2.0441	2.1071	2.1504	2.0969	2.0775	2.1309	2.2087	2.1309	2.0673	2.1505	2.1505	2.1978	2.1978	2.1334	2.1334	2.1778	2.0906	2.0838	2.0906	2.0432	2.0212	2.058	2.1788	2.0432	2.0771	2.0771	1.9902	2.2129	2.2129	2.1432	2.1432	2.0387	2.0387	2.1711	2.1711	2.0699	2.0866	2.0866	2.1701	2.0834	2.2114	2.2114	2.0834	2.1151
28.5	2.1122	2.047	2.0819	2.0312	2.0983	2.0176	2.1082	2.1572	2.0942	2.0645	2.1359	2.2008	2.1359	2.0666	2.1491	2.1491	2.1869	2.1282	2.1118	2.1118	2.1701	2.0925	2.2113	2.0925	2.0489	2.0745	2.0327	2.2007	2.0489	2.1044	2.1044	1.9891	2.213	2.213	2.1611	2.1752	2.0672	2.0672	2.1891	2.1891	2.0586	2.107	2.107	2.12	2.1445	2.2447	2.2447	2.1019	2.1438
30	2.1191	2.0423	2.0842	2.0172	2.0849	1.9943	2.1084	2.1665	2.0965	2.0465	2.1401	2.1932	2.1401	2.0682	2.15	2.15	2.2079	2.1536	2.1568	2.1105	2.208	2.0863	2.0115	2.0863	2.0132	2.0367	2.071	2.2051	2.0132	2.1099	2.1099	1.9808	2.2169	2.2169	2.1685	2.1775	2.0935	2.0935	2.2135	2.2135	2.0425	2.1089	2.1089	2.1458	2.1542	2.2258	2.2167	2.105	2.1017
31.5	2.1184	2.0419	2.0893	1.9964	2.0755	1.9645	2.1107	2.173	2.0973	2.0903	2.1465	2.1961	2.1465	2.0732	2.1532	2.1532	2.1871	2.1522	2.1579	2.1065	2.2121	2.0209	2.0181	2.0209	2.0181	2.0231	2.0798	2.2894	2.0165	2.1195	2.1195	2.1405	2.2253	2.2253	2.1599	2.1702	2.1127	2.1127	2.2337	2.2337	2.0317	2.0924	2.0924	2.1373	2.1631	2.2565	2.2357	2.1053	2.107
33	2.1207	2.0366	2.0917	1.9779	2.0629	1.9345	2.105	2.1902	2.1002	2.068	2.1596	2.2025	2.1596	2.079	2.1543	2.1543	2.1762	2.1512	2.1534	2.106	2.209	1.9834	2.0413	1.9977	1.9993	2.0196	2.0741	2.3834	2.0047	2.1278	2.1278	2.1728	2.2293	2.2293	2.1542	2.1738	2.1484	2.1484	2.2554	2.2554	2.0273	2.1307	2.078	2.1149	2.1744	2.2647	2.2546	2.1175	2.1024
34.5	2.1324	2.0369	2.0984	1.9673	2.0556	1.9246	2.091	2.193	2.1012	2.0653	2.1749	2.2098	2.1749	1.994	2.1578	2.1578	2.1729	2.15	2.1429	2.0971	2.2055	1.9949	2.06	2.0752	1.987	2.0232	2.0776	2.2578	1.9884	2.1225	2.1225	2.1664	2.2306	2.2306	2.1408	2.1694	2.068	2.1093	2.2743	2.2743	2.0286	2.1407	2.0687	2.123	2.183	2.2745	2.2516	2.1224	2.0872
36	2.1452	2.0409	2.1061	1.9554	2.0513	1.912	2.0884	2.1848	2.0999	2.0568	2.181	2.2207	2.181	2.07	2.1483	2.1483	2.1535	2.1512	2.1364	2.1037	2.1965	1.9642	2.0534	2.051	1.9823	2.0015	2.0681	2.2742	1.9727	2.1075	2.1075	2.1747	2.2267	2.1855	2.1337	2.1598	2.0555	2.0988	2.2461	2.2499	2.0325	2.1356	2.0849	2.1276	2.1871	2.2747	2.2564	2.122	2.0846
37.5	2.1582	2.045	2.1063	1.9446	2.0514	1.908	2.0876	2.1902	2.0997	2.0553	2.1612	2.2262	2.1612	2.0556	2.1106	2.1204	2.1368	2.158	2.131	2.1075	2.1797	1.9633	2.0523	2.0477	1.994	1.9927	2.0713	2.2796	1.976	2.1074	2.1074	2.1848	2.2151	2.1724	2.1215	2.1547	2.037	2.074	2.2339	2.2351	2.0315	2.1323	2.0731	2.1372	2.1972	2.2907	2.2771	2.1403	2.077
39	2.1736	2.0499	2.1089	1.9397	2.0522	1.9095	2.0964	2.1917	2.1373	2.0568	2.1538	2.1804	2.1577	2.0433	2.095	2.1144	2.1361	2.1682	2.1264	2.114	2.1905	1.967	2.0278	2.0452	2.0039	1.9829	2.0669	2.291	1.9747	2.1118	2.0476	2.0972	2.2056	2.1579	2.1207	2.1504	2.019	2.0757	2.2285	2.2059	2.0416	2.1357	2.0935	2.1361	2.2071	2.2944	2.2869	2.1442	2.0961
[truncated: 51 more columns]

## Sheet: Fig2G-mRuby-low
time (h)	cell 1	cell 2	cell 3	cell 4	cell 5	cell 6	cell 7	cell 8	cell 9	cell 10	cell 11	cell 12	cell 13	cell 14	cell 15	cell 16	cell 17	cell 18	cell 19	cell 20	cell 21	cell 22	cell 23	cell 24	cell 25	cell 26	cell 27	cell 28	cell 29	cell 30	cell 31	cell 32	cell 33	cell 34	cell 35	cell 36	cell 37	cell 38	cell 39	cell 40	cell 41	cell 42	cell 43	cell 44	cell 45	cell 46	cell 47	cell 48	cell 49
1.5	-0.35341	-0.41466	-0.35341	-0.41466	-0.41466	-0.41466	-0.59163	-0.59163	-0.59163	-0.37944	-0.32846	-0.39654	-0.32846	-0.3287	-0.32846	-0.32846	-0.53904	-0.53904	-0.53904	-0.53904	-0.39027	-0.4175	-0.18732	-0.4175	-0.18732	-0.18732	-0.4175	-0.33556	-0.18732	-0.2937	-0.2937	-0.30083	-0.45559	-0.45559	-0.456	-0.456	-0.46778	-0.46778	-0.41828	-0.41828	-0.38323	-0.29333	-0.29333	-0.38223	-0.35959	-0.35959	-0.35959	-0.35959	-0.39351
3	-0.37782	-0.47215	-0.37782	-0.47215	-0.47215	-0.47215	-0.55898	-0.55898	-0.58382	-0.45234	-0.31692	-0.40504	-0.31692	-0.31828	-0.31692	-0.31692	-0.43754	-0.43754	-0.43754	-0.43754	-0.39265	-0.39559	-0.35113	-0.39559	-0.26724	-0.35822	-0.39559	-0.37191	-0.26724	-0.28286	-0.28286	-0.28066	-0.44164	-0.44164	-0.44051	-0.44051	-0.40396	-0.40396	-0.38211	-0.38211	-0.44445	-0.30585	-0.30585	-0.40189	-0.30061	-0.30061	-0.30061	-0.30061	-0.40193
4.5	-0.38177	-0.3926	-0.38177	-0.3926	-0.41016	-0.41016	-0.48127	-0.48127	-0.45794	-0.47124	-0.35231	-0.46961	-0.35231	-0.34767	-0.35231	-0.35231	-0.46375	-0.46375	-0.46375	-0.46375	-0.40313	-0.32945	-0.37005	-0.32945	-0.30193	-0.38359	-0.32945	-0.33973	-0.30193	-0.22582	-0.22582	-0.29287	-0.48208	-0.48208	-0.4477	-0.4477	-0.41181	-0.41181	-0.30386	-0.30386	-0.25874	-0.32201	-0.32201	-0.40362	-0.35603	-0.35603	-0.35603	-0.35603	-0.43719
6	-0.42677	-0.39878	-0.42677	-0.39878	-0.32404	-0.32404	-0.46982	-0.46982	-0.50871	-0.42951	-0.33808	-0.46199	-0.33808	-0.34266	-0.33808	-0.33808	-0.42296	-0.42296	-0.42296	-0.42296	-0.40965	-0.41117	-0.36994	-0.41117	-0.33071	-0.38936	-0.41117	-0.37129	-0.33071	-0.28032	-0.28032	-0.36394	-0.47453	-0.47453	-0.26093	-0.26093	-0.37024	-0.37024	-0.23027	-0.23027	-0.40256	-0.33956	-0.33956	-0.43191	-0.39487	-0.39487	-0.39487	-0.39487	-0.44979
7.5	-0.28266	-0.37221	-0.28266	-0.37221	-0.33847	-0.33847	-0.57091	-0.57091	-0.53553	-0.25045	-0.325	-0.44866	-0.325	-0.33701	-0.325	-0.325	-0.39201	-0.39201	-0.39201	-0.39201	-0.43021	-0.43534	-0.37103	-0.43534	-0.34868	-0.39585	-0.43534	-0.32206	-0.34868	-0.25942	-0.25942	-0.38601	-0.45037	-0.45037	-0.35052	-0.35052	-0.33892	-0.33892	-0.17865	-0.17865	-0.4436	-0.31772	-0.31772	-0.2058	-0.4066	-0.4066	-0.4066	-0.4066	-0.42908
9	-0.35158	-0.30616	-0.35158	-0.30616	-0.34837	-0.34837	-0.59818	-0.59818	-0.48366	-0.40449	-0.33296	-0.45407	-0.33296	-0.419	-0.33296	-0.33296	-0.17193	-0.17193	-0.1431	-0.1431	-0.41515	-0.37484	-0.35164	-0.37484	-0.35741	-0.38142	-0.40518	-0.36471	-0.35741	-0.21856	-0.21856	-0.39407	-0.51145	-0.51145	-0.35637	-0.35637	-0.31212	-0.31212	-0.062128	-0.062128	-0.41153	-0.34453	-0.34453	-0.33327	-0.39094	-0.41918	-0.41918	-0.39094	-0.40242
10.5	-0.10453	-0.34963	-0.10453	-0.34963	-0.33084	-0.33084	-0.55132	-0.55132	-0.52445	-0.42647	-0.30481	-0.40444	-0.30481	-0.30182	-0.30481	-0.30481	-0.3226	-0.3226	-0.41009	-0.41009	-0.34202	-0.30244	-0.33672	-0.30244	-0.33834	-0.37109	-0.42177	-0.38289	-0.33834	-0.18223	-0.18223	-0.41499	-0.52676	-0.52676	-0.35535	-0.35535	-0.25286	-0.25286	0.038318	0.038318	-0.36936	-0.18003	-0.18003	-0.30103	-0.34337	-0.40139	-0.40139	-0.34337	-0.30311
12	-0.35335	-0.31661	-0.35335	-0.31661	-0.381	-0.381	-0.61842	-0.61842	-0.548	-0.41359	-0.29346	-0.38653	-0.29346	-0.29452	-0.29346	-0.29346	-0.33922	-0.33922	-0.39792	-0.39792	-0.42586	-0.30565	-0.34758	-0.30565	-0.35085	-0.38619	-0.3982	-0.36752	-0.35085	-0.1813	-0.1813	-0.39138	-0.25038	-0.25038	-0.40298	-0.40298	-0.22669	-0.22669	0.062872	0.062872	-0.37575	-0.24846	-0.24846	-0.32643	-0.29021	-0.43586	-0.43586	-0.29021	-0.27942
13.5	-0.3398	-0.33841	-0.3398	-0.33841	-0.33903	-0.33903	-0.63262	-0.63262	-0.50944	-0.42319	-0.15161	-0.34885	-0.15161	-0.25259	-0.15161	-0.15161	-0.29701	-0.29701	-0.36846	-0.36846	-0.41179	-0.3958	-0.3547	-0.3958	-0.37762	-0.39725	-0.43895	-0.43222	-0.37762	-0.11623	-0.11623	-0.39451	-0.28445	-0.28445	-0.40517	-0.40517	-0.14335	-0.14335	0.045326	0.045326	-0.3678	-0.19286	-0.19286	-0.32686	-0.35806	-0.42969	-0.42969	-0.35806	-0.36112
15	-0.37074	-0.34951	-0.37074	-0.34951	-0.30956	-0.30956	-0.62753	-0.62753	-0.50452	-0.44356	-0.29026	-0.19615	-0.29026	-0.31025	-0.29148	-0.29148	-0.34704	-0.34704	-0.38375	-0.38375	-0.43609	-0.37186	-0.35603	-0.37186	-0.37127	-0.40225	-0.38553	-0.50024	-0.37127	-0.068035	-0.068035	-0.3789	-0.3692	-0.3692	-0.45218	-0.45218	-0.16481	-0.16481	0.10345	0.10345	-0.38655	-0.17123	-0.17123	-0.36876	-0.39317	-0.52585	-0.52585	-0.39317	-0.35057
16.5	-0.39535	-0.34631	-0.39535	-0.34631	-0.2994	-0.2994	-0.5895	-0.5895	-0.49558	-0.4625	-0.21027	-0.18709	-0.21027	-0.34094	-0.27044	-0.27044	-0.3361	-0.3361	-0.36871	-0.36871	-0.42021	-0.44097	-0.35458	-0.44097	-0.42617	-0.40422	-0.41941	-0.24975	-0.42617	0.019984	0.019984	-0.4621	-0.2706	-0.2706	-0.42195	-0.42195	-0.13194	-0.13194	0.085076	0.085076	-0.41715	-0.15941	-0.15941	-0.32333	-0.34111	-0.5161	-0.5161	-0.34111	-0.38338
18	-0.37943	-0.38173	-0.37943	-0.38173	-0.33314	-0.33314	-0.64358	-0.64358	-0.56209	-0.47533	-0.17247	-0.13334	-0.17247	-0.3294	-0.22073	-0.22073	-0.31762	-0.31762	-0.37694	-0.37694	-0.3921	-0.37914	-0.35377	-0.37914	-0.3659	-0.40663	-0.41823	-0.21136	-0.3659	-0.031716	-0.031716	-0.38146	-0.28884	-0.28884	-0.45753	-0.45753	-0.18331	-0.18331	0.051815	0.051815	-0.39863	-0.091182	-0.091182	-0.28498	-0.30406	-0.53941	-0.53941	-0.30406	-0.37756
19.5	-0.42755	-0.3617	-0.42755	-0.3617	-0.36217	-0.36217	-0.5129	-0.5129	-0.48419	-0.50194	-0.11577	-0.098831	-0.11577	-0.32374	-0.15274	-0.15274	-0.33093	-0.33093	-0.38993	-0.38993	-0.46361	-0.38777	-0.30111	-0.38777	-0.41763	-0.35697	-0.4232	-0.39822	-0.41763	0.00072339	0.00072339	-0.12596	-0.28759	-0.28759	-0.43273	-0.43273	-0.16782	-0.16782	-0.0047174	-0.0047174	-0.38688	-0.056271	-0.056271	-0.29154	-0.336	-0.55567	-0.55567	-0.336	-0.37608
21	-0.44277	-0.37646	-0.44277	-0.37646	-0.29229	-0.29229	-0.57113	-0.57113	-0.52863	-0.47292	-0.11588	-0.10291	-0.11588	-0.31776	-0.11907	-0.11907	-0.34098	-0.34098	-0.35469	-0.35469	-0.51406	-0.43202	-0.3117	-0.43202	-0.38909	-0.3716	-0.44303	-0.43252	-0.38909	-0.037715	-0.037715	-0.24714	-0.30842	-0.30842	-0.45905	-0.45905	-0.19133	-0.19133	-0.023537	-0.023537	-0.45592	-0.015408	-0.015408	-0.29363	-0.34497	-0.56088	-0.56088	-0.34497	-0.35394
22.5	-0.41434	-0.36379	-0.41434	-0.36379	-0.3248	-0.3248	-0.54558	-0.5676	-0.54128	-0.48418	-0.11302	-0.094772	-0.11302	-0.29433	-0.11095	-0.11095	-0.34578	-0.34578	-0.31632	-0.31632	-0.5132	-0.41041	-0.2424	-0.41041	-0.40473	-0.34641	-0.49049	-0.58621	-0.40473	-0.067707	-0.067707	-0.29234	-0.36237	-0.36237	-0.44108	-0.44108	-0.2202	-0.2202	-0.062942	-0.062942	-0.37984	-0.024249	-0.024249	-0.27293	-0.32757	-0.56256	-0.56256	-0.32757	-0.35181
24	-0.17982	-0.38452	-0.17982	-0.38452	-0.34325	-0.34325	-0.43934	-0.49444	-0.7419	-0.49766	-0.12317	-0.051188	-0.12317	-0.30966	-0.089842	-0.089842	-0.3086	-0.3086	-0.26858	-0.26858	-0.51655	-0.43602	-0.13536	-0.43602	-0.42286	-0.3402	-0.52776	-0.50965	-0.42286	-0.11183	-0.11183	-0.30247	-0.34203	-0.34203	-0.44236	-0.44236	-0.22887	-0.22887	-0.11176	-0.11176	-0.3481	-0.04118	-0.04118	-0.27024	-0.36754	-0.56808	-0.56808	-0.36754	-0.35318
25.5	-0.36879	-0.49782	-0.30691	-0.47486	-0.19745	-0.28924	-0.52116	-0.50576	-0.4796	-0.44674	-0.14326	-0.016269	-0.14326	-0.31697	-0.064968	-0.064968	-0.27419	-0.27419	-0.19519	-0.19519	-0.55169	-0.41251	-0.015049	-0.41251	-0.42307	-0.37009	-0.44504	-0.48176	-0.42307	-0.10409	-0.10409	-0.37663	-0.33398	-0.33398	-0.42187	-0.42187	-0.22911	-0.22911	-0.11125	-0.11125	-0.31204	-0.038411	-0.038411	-0.27077	-0.36998	-0.49779	-0.49779	-0.36998	-0.32525
27	-0.34811	-0.38244	-0.355	-0.32296	-0.17164	-0.2879	-0.47099	-0.46458	-0.47441	-0.44536	-0.14055	0.0013593	-0.14055	-0.35535	-0.09119	-0.09119	-0.25457	-0.25457	-0.11589	-0.11589	-0.51742	-0.3928	0.10092	-0.3928	-0.42182	-0.29854	-0.50533	-0.54754	-0.42182	-0.16589	-0.16589	-0.37468	-0.35441	-0.35441	-0.2126	-0.2126	-0.21256	-0.21256	-0.12445	-0.12445	-0.13348	-0.07507	-0.07507	-0.25767	-0.17493	-0.46224	-0.46224	-0.17493	-0.25795
28.5	-0.37929	-0.36979	-0.31386	-0.36013	-0.029078	-0.31819	-0.48	-0.45832	-0.39473	-0.35621	-0.15203	0.02428	-0.15203	-0.29783	-0.058532	-0.058532	-0.2071	-0.28833	0.051477	0.051477	-0.28138	-0.38161	0.32635	-0.38161	-0.41459	-0.31376	-0.56768	-0.52959	-0.41459	-0.1194	-0.1194	-0.3913	-0.36463	-0.36463	-0.30309	-0.31329	-0.17269	-0.17269	-0.16332	-0.16332	-0.23236	-0.085927	-0.085927	-0.14698	-0.29157	-0.43513	-0.43513	-0.33782	-0.24146
30	-0.34271	-0.38735	-0.35875	-0.39099	-0.25686	-0.3151	-0.43124	-0.49383	-0.38204	-0.36097	-0.15282	0.031479	-0.15282	-0.33064	-0.096357	-0.096357	-0.099442	-0.16566	0.035877	0.0065116	-0.45988	-0.41848	0.25242	-0.41848	-0.2381	-0.31331	-0.35688	-0.50478	-0.2381	-0.080857	-0.080857	-0.45812	-0.33358	-0.33358	-0.22565	-0.26031	-0.14898	-0.14898	-0.21865	-0.21865	-0.23267	-0.13568	-0.13568	-0.26995	-0.29193	-0.37608	-0.43575	-0.391	-0.209
31.5	-0.37551	-0.36298	-0.38192	-0.41584	-0.2891	-0.39033	-0.46352	-0.49585	-0.42427	-0.41573	-0.14549	0.05627	-0.14549	-0.32446	-0.1036	-0.1036	-0.15038	-0.16815	0.08088	0.047021	-0.43765	-0.29522	0.29536	-0.29522	-0.304	-0.35165	-0.38368	-0.41962	-0.27292	-0.085096	-0.085096	-0.4472	-0.32661	-0.32661	-0.18575	-0.23117	-0.12433	-0.12433	-0.20332	-0.20332	-0.24108	-0.0013872	-0.0013872	-0.25154	-0.2697	-0.34381	-0.3479	-0.41023	-0.14839
33	-0.4116	-0.39311	-0.40118	-0.43412	-0.28615	-0.40817	-0.55333	-0.51201	-0.42598	-0.38896	-0.16561	0.051743	-0.16561	-0.34152	-0.16413	-0.16413	-0.15086	-0.1404	0.10148	0.059754	-0.41315	-0.36559	0.35469	-0.48982	-0.30898	-0.44928	-0.40097	-0.31117	-0.23017	-0.072374	-0.072374	-0.38349	-0.35902	-0.35902	-0.19435	-0.20386	-0.077032	-0.077032	-0.24218	-0.24218	-0.27996	-0.11747	-0.1999	-0.37175	-0.28728	-0.34507	-0.31239	-0.44873	-0.18231
34.5	-0.38605	-0.42963	-0.42454	-0.42426	-0.29333	-0.37433	-0.52877	-0.54302	-0.42944	-0.43817	-0.12943	0.050668	-0.12943	-0.39546	-0.15885	-0.15885	-0.11807	-0.16289	0.096065	0.054971	-0.43531	-0.37753	0.40165	-0.3269	-0.32268	-0.34024	-0.32249	-0.50952	-0.25952	0.017749	0.017749	-0.46104	-0.19744	-0.19744	-0.16779	-0.1398	-0.086181	-0.089626	-0.14127	-0.14127	-0.27304	-0.081476	-0.20371	-0.34832	-0.28791	-0.32424	-0.36941	-0.48059	-0.20582
36	-0.37487	-0.42777	-0.45302	-0.50395	-0.3248	-0.40143	-0.53831	-0.53389	-0.44198	-0.43175	-0.16062	0.037316	-0.16062	-0.28051	-0.24845	-0.24845	-0.19849	-0.20149	0.069655	0.021889	-0.41097	-0.42871	0.42544	-0.36082	-0.33328	-0.38774	-0.38324	-0.49978	-0.30279	0.12143	0.12143	-0.46642	-0.29524	-0.28642	-0.19185	-0.19444	-0.13841	-0.089801	-0.16413	-0.16289	-0.29917	-0.086587	-0.20019	-0.39773	-0.33692	-0.31248	-0.37456	-0.49328	-0.22131
37.5	-0.39836	-0.40827	-0.43726	-0.48337	-0.31318	-0.4538	-0.55003	-0.55711	-0.44909	-0.4658	-0.040179	0.016763	-0.040179	-0.28054	-0.245	-0.24392	-0.24354	-0.2451	0.056432	0.00067164	-0.46671	-0.45435	0.35591	-0.39839	-0.32174	-0.41968	-0.4545	-0.20328	-0.31401	0.19489	0.19489	-0.50441	-0.29236	-0.34238	-0.22814	-0.19038	-0.19186	-0.14821	-0.11884	-0.16972	-0.32292	-0.058696	-0.18775	-0.40309	-0.33111	-0.30838	-0.35564	-0.4306	-0.28379
39	-0.38071	-0.41669	-0.46706	-0.4829	-0.34341	-0.4862	-0.53293	-0.57809	-0.48568	-0.51955	-0.13959	0.080475	-0.17674	-0.25409	-0.20609	-0.23727	-0.21337	-0.25826	0.02685	-0.038179	-0.45802	-0.4459	0.38102	-0.38336	-0.29414	-0.4264	-0.42018	-0.21867	-0.29315	0.352	0.2783	-0.32427	-0.2731	-0.34256	-0.18882	-0.20366	-0.22638	-0.1749	-0.1891	-0.25806	-0.40166	-0.012019	-0.15917	-0.36005	-0.36362	-0.30724	-0.33639	-0.51072	-0.27586
[truncated: 51 more columns]

## Sheet: Fig2H-GFP-high
time (h)	cell 1	cell 2	cell 3	cell 4	cell 5	cell 6	cell 7	cell 8	cell 9	cell 10	cell 11	cell 12	cell 13	cell 14	cell 15	cell 16	cell 17	cell 18	cell 19	cell 20	cell 21	cell 22	cell 23	cell 24	cell 25	cell 26	cell 27	cell 28	cell 29	cell 30	cell 31	cell 32	cell 33	cell 34	cell 35	cell 36	cell 37	cell 38	cell 39	cell 40	cell 41	cell 42	cell 43	cell 44	cell 45	cell 46	cell 47	cell 48	cell 49
1.5	1.8189	1.8191	2.0373	2.0373	1.8874	1.7857	1.7857	1.8692	1.8692	1.7048	2.0055	2.0055	1.8154	1.8154	1.7938	1.7938	1.7648	1.7648	1.5709	1.5709	1.5709	1.5709	1.9196	1.9196	1.9196	1.8694	1.8694	1.9168	1.9168	1.9366	1.9731	1.9731	1.9731	1.9731	1.714	1.714	1.714	1.714	2.0039	2.0383	2.0383	1.8402	1.8402	1.8996	1.9033	1.8898	1.8898	1.9033	1.8071
3	1.8583	1.8547	2.0501	2.0501	1.9195	1.8152	1.8152	1.9102	1.9102	1.7685	2.0179	2.0179	1.8525	1.8525	1.8348	1.8348	1.8	1.8	1.6269	1.6269	1.6269	1.6269	1.9582	1.9582	1.9582	1.909	1.909	1.9316	1.9316	1.965	1.9952	1.9952	1.9952	1.9952	1.7634	1.7634	1.7634	1.7634	2.0211	2.0371	2.0371	1.8847	1.8847	1.8154	1.9366	1.9368	1.9368	1.9366	1.8932
4.5	1.8891	1.8887	2.0586	2.0586	1.9438	1.8301	1.8301	1.951	1.951	1.8086	2.0365	2.0365	1.8918	1.8918	1.8641	1.8641	1.8393	1.8393	1.6781	1.6781	1.6781	1.6781	1.987	1.987	1.987	1.9126	1.9126	1.977	1.977	1.9903	2.0333	2.0333	2.0333	2.0333	1.8002	1.8002	1.8002	1.8002	2.0476	2.0595	2.0595	1.9258	1.9258	1.8787	1.9944	1.9675	1.9675	1.9944	1.83
6	1.9251	1.9228	2.0654	2.0654	1.9356	1.8518	1.8518	1.9823	1.9823	1.8226	2.0583	2.0583	1.9224	1.9224	1.8894	1.8894	1.8704	1.8704	1.7311	1.7311	1.7311	1.7311	1.9991	1.9991	1.9991	1.9195	1.9195	2.0168	2.0168	2.0223	2.0658	2.0658	2.0658	2.0658	1.8344	1.8344	1.8344	1.8344	2.076	2.0826	2.0826	1.9618	1.9618	1.8873	2.0256	1.9878	1.9878	2.0256	1.8372
7.5	1.8706	1.873	2.073	2.073	1.9488	1.8697	1.8697	2.0045	2.0045	1.8107	2.0793	2.0793	1.9598	1.9598	1.9173	1.9173	1.9005	1.9005	1.8044	1.8044	1.8044	1.8044	1.9746	1.9746	1.9746	1.9516	1.9516	2.0429	2.0429	2.0519	2.0946	2.0946	2.0946	2.0946	1.8722	1.8722	1.8722	1.8722	2.0708	2.1162	2.1162	1.9773	1.9773	1.9031	2.0584	2.0106	2.0106	2.0584	1.886
9	1.9393	1.9385	2.0807	2.0807	1.9535	1.8935	1.8935	1.9863	1.9863	1.8037	2.0988	2.0988	1.9981	1.9981	1.944	1.944	1.9353	1.9353	1.865	1.865	1.865	1.865	1.9669	1.9669	1.9669	1.9748	1.9748	2.0677	2.0677	2.0853	2.1148	2.1148	2.1148	2.1148	1.8997	1.8997	1.8997	1.8997	2.0652	2.1361	2.1361	2.0027	2.0027	1.9431	2.0265	2.0379	2.0379	2.0265	1.8853
10.5	1.9538	1.9551	2.088	2.088	1.9791	1.9245	1.9245	1.9319	1.9319	1.8189	2.1067	2.1067	2.0401	2.0401	1.9726	1.9726	1.9008	1.9008	1.9502	1.9502	1.9502	1.9502	1.9786	1.9786	1.9786	2.004	2.004	2.0964	2.0964	2.0384	2.1398	2.1398	2.1398	2.1398	1.8949	1.8949	1.8949	1.8949	2.0572	2.0039	2.0039	2.0375	2.0375	1.9816	2.0531	2.048	2.048	2.0531	1.9255
12	1.9906	1.989	2.0979	2.0979	2.0032	1.9474	1.9474	1.969	1.969	1.864	2.1154	2.1154	2.0782	2.0782	1.9789	1.9789	1.9487	1.9487	1.9646	1.9646	1.9409	1.9409	1.9862	1.9862	1.9862	2.0334	2.0334	2.1236	2.1236	2.0876	2.053	2.0812	2.053	2.0812	1.8824	1.8824	1.9437	1.9437	2.0479	2.0429	2.0429	2.0727	2.0727	2.0132	2.0508	2.0595	2.0595	2.0508	1.9511
13.5	2.0434	2.0408	2.1001	2.1001	2.0332	1.9344	1.9344	1.9583	1.9583	1.9267	2.1189	2.1189	2.1174	2.1174	2.0047	2.0047	1.9658	1.9658	1.9921	1.9921	1.9707	1.9707	2.0205	2.0205	2.0205	2.0736	2.0736	2.1632	2.1632	2.0815	2.1	2.1417	2.1	2.1417	1.8885	1.8885	1.9461	1.9461	2.0547	2.0472	2.0472	2.1149	2.1149	2.0527	2.065	2.064	2.064	2.065	1.9907
15	2.0661	2.0672	2.0434	2.1343	2.048	1.9437	1.9437	1.9438	1.9438	1.9638	2.1263	2.1263	2.1449	2.1449	2.0218	2.0218	1.9794	1.9794	2.0114	2.0114	1.9919	1.9919	2.0406	2.0406	2.0406	2.0946	2.0946	2.1354	2.1354	2.0699	2.1015	2.1255	2.1015	2.1255	1.8928	1.8928	1.9412	1.9412	2.0488	2.0301	2.0301	2.1378	2.1378	2.0784	2.0937	2.0617	2.0617	2.0937	2.013
16.5	2.0945	2.0927	2.0545	2.1391	2.0689	1.9505	1.9505	1.9428	1.9428	1.9944	2.1429	2.1429	2.1462	2.1462	2.0462	2.0462	2.0034	2.0034	2.0396	2.0396	2.026	2.026	2.0643	2.0643	2.0643	2.1162	2.1162	2.1258	2.1258	2.0587	2.1112	2.1075	2.1112	2.1075	1.9181	1.9181	1.9466	1.9466	2.0509	2.0375	2.0375	2.1535	2.1535	2.1044	2.1153	2.0689	2.0689	2.1153	2.0465
18	2.1063	2.107	2.0551	2.1245	2.0817	1.9639	1.9639	1.9481	1.9481	2.0325	2.1588	2.1588	2.15	2.15	2.062	2.062	2.0243	2.0243	2.0638	2.0638	2.0576	2.0576	2.0854	2.0854	2.0854	2.1384	2.1384	2.1285	2.1285	2.0633	2.12	2.0894	2.12	2.0894	1.9471	1.9471	1.981	1.981	2.051	2.0437	2.0437	2.113	2.113	2.1281	2.1398	2.0925	2.0925	2.1398	2.0766
19.5	2.1107	2.1108	2.0328	2.1167	2.0928	1.9667	1.9667	1.9677	1.9677	2.066	2.1647	2.1647	2.1476	2.1476	2.0837	2.0837	2.0378	2.0378	2.0783	2.0783	2.0849	2.0849	2.1114	2.1114	2.1114	2.1622	2.1622	2.1349	2.1349	2.0523	2.1199	2.0783	2.1199	2.0783	1.985	1.985	2.018	2.018	2.0571	2.0413	2.0413	2.1146	2.1146	2.1526	2.1564	2.1065	2.1065	2.1564	2.0962
21	2.1191	2.1184	2.0431	2.1074	2.1016	1.9788	1.9788	1.9947	1.9947	2.0959	2.1711	2.1711	2.134	2.134	2.108	2.108	2.0455	2.0455	2.0979	2.0979	2.0995	2.0995	2.1365	2.1365	2.1365	2.1815	2.1815	2.1432	2.1432	2.0382	2.1191	2.0681	2.1191	2.0681	2.0084	2.0084	2.0388	2.0388	2.0697	2.0532	2.0532	2.1017	2.1017	2.1514	2.1648	2.1172	2.1172	2.1648	2.1247
22.5	2.1437	2.143	2.0401	2.0958	2.1166	1.9861	1.9861	2.0191	2.0191	2.1215	2.1793	2.1793	2.1234	2.1234	2.1378	2.1378	2.052	2.052	2.1109	2.1109	2.1207	2.1207	2.1647	2.1647	2.1647	2.2008	2.2008	2.1468	2.1468	2.0422	2.1172	2.0658	2.1172	2.0658	2.027	2.027	2.0548	2.0548	2.076	2.0603	2.0603	2.0945	2.0945	2.2699	2.1774	2.0956	2.0956	2.1774	2.131
24	2.164	2.1638	2.0357	2.0881	2.1364	2.0007	2.0007	2.0426	2.0426	2.147	2.1878	2.1878	2.1164	2.1164	2.1626	2.1626	2.0558	2.0558	2.1293	2.1293	2.1495	2.1495	2.1933	2.1933	2.1933	2.2146	2.2146	2.1503	2.1503	2.0494	2.1166	2.0874	2.1166	2.0874	2.047	2.047	2.076	2.076	2.0774	2.0684	2.0684	2.0859	2.0859	2.132	2.195	2.086	2.086	2.195	2.1997
25.5	2.1842	2.1823	2.0306	2.0817	2.1536	2.017	2.017	2.0761	2.0761	2.1459	2.1988	2.1988	2.1088	2.1088	2.1923	2.1923	2.0661	2.0661	2.1485	2.1485	2.1824	2.1824	2.1976	2.1436	2.1976	2.2259	2.2259	2.1501	2.1501	2.0633	2.1279	2.1063	2.1279	2.1063	2.0576	2.0576	2.1034	2.1034	2.0755	2.0696	2.0696	2.0834	2.0834	2.1754	2.2105	2.0806	2.0717	2.2105	2.1524
27	2.1858	2.1864	2.0261	2.0742	2.1692	2.0193	2.0193	2.111	2.111	2.1026	2.2127	2.2127	2.1051	2.1051	2.2185	2.2185	2.0718	2.0718	2.1669	2.1669	2.2137	2.2137	2.269	2.1867	2.269	2.242	2.242	2.1471	2.1471	2.0804	2.1496	2.123	2.1496	2.123	2.0938	2.0938	2.1219	2.1219	2.0947	2.0638	2.0638	2.0742	2.0742	2.1586	2.2253	2.077	2.0636	2.2253	2.1122
28.5	2.1765	2.1703	2.0344	2.0753	2.1766	2.0475	2.0475	2.1247	2.1247	2.0901	2.2246	2.2246	2.1157	2.1157	2.224	2.224	2.0802	2.0802	2.1869	2.1869	2.2393	2.2393	2.2332	2.1938	2.27	2.2545	2.2545	2.144	2.144	2.091	2.1725	2.1319	2.1725	2.1319	2.1181	2.1181	2.1366	2.1366	2.1034	2.0745	2.0745	2.0735	2.0735	2.1539	2.238	2.0788	2.0568	2.238	2.091
30	2.1367	2.1347	2.0507	2.0734	2.1236	2.0721	2.0721	2.1467	2.1467	2.0801	2.194	2.194	2.1356	2.1356	2.2175	2.2363	2.0944	2.0944	2.198	2.198	2.2625	2.2625	2.2265	2.1924	2.2671	2.2065	2.2065	2.1591	2.1591	2.1006	2.1987	2.1434	2.1987	2.1434	2.1286	2.1286	2.1374	2.1374	2.0863	2.0993	2.0993	2.0742	2.0742	2.1412	2.2423	2.0783	2.0468	2.2423	2.126
31.5	2.1416	2.14	2.0701	2.0696	2.1422	2.0963	2.0963	2.1238	2.1197	2.0783	2.1955	2.254	2.165	2.165	2.2519	2.2685	2.1009	2.1009	2.1578	2.1578	2.2862	2.2862	2.2384	2.198	2.2541	2.1856	2.2323	2.1616	2.1616	2.1022	2.2164	2.1566	2.2164	2.1566	2.1402	2.1402	2.1041	2.1387	2.0824	2.1035	2.1035	2.0856	2.0856	2.1398	2.2143	2.0774	2.0494	2.1699	2.12
33	2.1354	2.1344	2.0796	2.0633	2.1302	2.1098	2.1098	2.1337	2.1196	2.0825	2.1957	2.2526	2.1924	2.1924	2.2501	2.2701	2.0937	2.0833	2.1871	2.1681	2.3111	2.3111	2.2422	2.1941	2.2263	2.1787	2.2331	2.1735	2.1735	2.0292	2.2558	2.0972	2.2558	2.1191	2.0979	2.0979	2.0911	2.1357	2.079	2.1152	2.1152	2.097	2.097	2.1364	2.2229	2.081	2.0396	2.1904	2.0894
34.5	2.1244	2.1223	2.0984	2.0541	2.1215	2.1423	2.1423	2.1213	2.112	2.0867	2.1912	2.2411	2.2194	2.2194	2.241	2.2724	2.0795	2.0785	2.1738	2.1522	2.2974	2.2894	2.2648	2.198	2.223	2.1559	2.2096	2.1736	2.1736	2.1065	2.2676	2.0813	2.1422	2.0956	2.1459	2.1179	2.0743	2.0986	2.0762	2.129	2.129	2.1008	2.1008	2.1359	2.2119	2.0948	2.0405	2.1804	2.0898
36	2.1289	2.1273	2.1056	2.0411	2.113	2.1465	2.1465	2.1155	2.1069	2.0992	2.1928	2.2378	2.2456	2.2456	2.2343	2.2847	2.0712	2.0657	2.163	2.1401	2.299	2.2812	2.2797	2.2068	2.2278	2.1595	2.2087	2.1929	2.1929	2.0922	2.2468	2.0609	2.1267	2.0808	2.148	2.1114	2.0662	2.093	2.0793	2.1487	2.1487	2.112	2.112	2.1298	2.2021	2.0992	2.0632	2.1769	2.0861
37.5	2.1294	2.1282	2.044	1.9436	2.0914	2.1632	2.1632	2.1085	2.1098	2.1145	2.2008	2.2375	2.2627	2.2627	2.2368	2.298	2.0542	2.0622	2.1463	2.1344	2.292	2.2721	2.2926	2.2122	2.2401	2.1528	2.2024	2.1658	2.1262	2.0774	2.2314	2.0597	2.1198	2.0569	2.1477	2.093	2.0602	2.085	2.0823	2.1589	2.1589	2.1248	2.1248	2.1291	2.1878	2.1055	2.0394	2.1807	2.1128
39	2.1317	2.1305	2.0483	1.9414	2.0778	2.1109	2.1089	2.1006	2.1227	2.1306	2.2131	2.2405	2.1392	2.1418	2.2346	2.3065	2.038	2.0553	2.1506	2.1299	2.295	2.2742	2.3005	2.2205	2.2492	2.1612	2.2064	2.1486	2.1079	2.0584	2.2183	2.0701	2.113	2.0388	2.1186	2.0755	2.0621	2.0827	2.0771	2.0804	2.1669	1.9663	2.0132	2.1277	2.1819	2.1144	2.0317	2.1794	2.1177
[truncated: 51 more columns]

## Sheet: Fig2H-GFP-low
time (h)	cell 1	cell 2	cell 3	cell 4	cell 5	cell 6	cell 7	cell 8	cell 9	cell 10	cell 11	cell 12	cell 13	cell 14	cell 15	cell 16	cell 17	cell 18	cell 19	cell 20	cell 21	cell 22	cell 23	cell 24	cell 25	cell 26	cell 27	cell 28	cell 29	cell 30	cell 31	cell 32	cell 33	cell 34	cell 35	cell 36	cell 37	cell 38	cell 39	cell 40	cell 41	cell 42	cell 43	cell 44	cell 45	cell 46	cell 47	cell 48	cell 49
1.5	1.9104	1.9143	1.9104	1.9143	1.9143	1.9143	1.9502	1.9502	1.9502	1.5964	1.9665	1.8365	1.9665	2.0109	1.9665	1.9665	1.7467	1.7467	1.7467	1.7467	1.8173	1.7003	1.9833	1.7003	1.9833	1.9833	1.7003	1.7566	1.9833	1.5945	1.5945	1.7894	1.7657	1.7657	1.6768	1.6768	1.6657	1.6657	1.944	1.944	1.5114	1.9106	1.9106	1.9717	1.8136	1.8136	1.8136	1.8136	1.7455
3	1.9371	1.9596	1.9371	1.9596	1.9596	1.9596	1.9082	1.9082	1.9557	1.6828	1.9826	1.8747	1.9826	2.051	1.9826	1.9826	1.8028	1.8028	1.8028	1.8028	1.8366	1.755	2.0246	1.755	1.9721	2.0175	1.755	1.7767	1.9721	1.6508	1.6508	1.7893	1.8264	1.8264	1.7304	1.7304	1.7077	1.7077	1.974	1.974	1.5505	1.9415	1.9415	2.0111	1.8629	1.8629	1.8629	1.8629	1.8079
4.5	1.9453	1.9699	1.9453	1.9699	1.9387	1.9387	1.9085	1.9085	1.9514	1.7532	1.9976	1.9192	1.9976	2.0864	1.9976	1.9976	1.8319	1.8319	1.8319	1.8319	1.8628	1.8092	2.0235	1.8092	1.9685	2.0099	1.8092	1.8066	1.9685	1.7217	1.7217	1.7991	1.8802	1.8802	1.7786	1.7786	1.7503	1.7503	1.9968	1.9968	1.5352	1.9729	1.9729	2.0436	1.9067	1.9067	1.9067	1.9067	1.8511
6	1.9173	1.9785	1.9173	1.9785	1.9478	1.9478	1.9238	1.9238	1.9681	1.8174	2.0136	1.9642	2.0136	2.1138	2.0136	2.0136	1.871	1.871	1.871	1.871	1.8881	1.8572	2.0437	1.8572	1.9744	2.0242	1.8572	1.8426	1.9744	1.7909	1.7909	1.8223	1.9391	1.9391	1.7746	1.7746	1.7874	1.7874	2.0261	2.0261	1.552	2.0045	2.0045	2.0607	1.9484	1.9484	1.9484	1.9484	1.8934
7.5	1.9262	1.986	1.9262	1.986	1.9595	1.9595	1.9403	1.9403	1.9872	1.8619	2.0383	2.0078	2.0383	2.13	2.0383	2.0383	1.9089	1.9089	1.9089	1.9089	1.8995	1.8797	2.0418	1.8797	1.985	2.017	1.8797	1.8655	1.985	1.8426	1.8426	1.8201	1.9873	1.9873	1.818	1.818	1.8155	1.8155	2.0489	2.0489	1.5596	2.0258	2.0258	2.0177	1.9764	1.9764	1.9764	1.9764	1.9197
9	1.929	2.0062	1.929	2.0062	1.9754	1.9754	1.9696	1.9696	2.0121	1.8592	2.0661	2.0569	2.0661	2.0783	2.0661	2.0661	1.9354	1.9354	1.8514	1.8514	1.8799	1.8858	2.0629	1.8858	2.0158	2.0331	1.8897	1.9072	2.0158	1.9044	1.9044	1.8401	2.043	2.043	1.8193	1.8193	1.8516	1.8516	2.0793	2.0793	1.6091	2.048	2.048	2.0616	1.9773	1.9442	1.9442	1.9773	1.9292
10.5	1.9607	2.0262	1.9607	2.0262	1.9982	1.9982	1.9834	1.9834	2.0298	1.8675	2.0989	2.0987	2.0989	2.0958	2.0989	2.0989	1.9416	1.9416	1.8943	1.8943	1.877	1.9006	2.0753	1.9006	2.0319	2.0409	1.8917	1.9503	2.0319	1.9395	1.9395	1.8519	2.0829	2.0829	1.8277	1.8277	1.8796	1.8796	2.1115	2.1115	1.693	1.9971	1.9971	2.067	1.9787	1.9534	1.9534	1.9787	1.9311
12	1.9892	2.0394	1.9892	2.0394	2.0181	2.0181	1.9922	1.9922	2.0437	1.8673	2.1223	2.1336	2.1223	2.091	2.1223	2.1223	1.9506	1.9506	1.9056	1.9056	1.8786	1.9002	2.0802	1.9002	2.0497	2.0416	1.8868	2.0044	2.0497	1.9656	1.9656	1.8797	2.126	2.126	1.8541	1.8541	1.8589	1.8589	2.1342	2.1342	1.7507	2.0509	2.0509	2.0738	1.9774	1.9334	1.9334	1.9774	1.9324
13.5	2.0218	2.0569	2.0218	2.0569	2.0512	2.0512	2.0279	2.0279	2.0785	1.8767	2.1253	2.177	2.1253	2.0949	2.1253	2.1253	1.9852	1.9852	1.9205	1.9205	1.9221	1.9271	2.0976	1.9271	2.0546	2.0551	1.902	2.0677	2.0546	1.9911	1.9911	1.9093	2.111	2.111	1.903	1.903	1.8712	1.8712	2.0886	2.0886	1.8447	2.056	2.056	2.0998	1.982	1.9734	1.9734	1.982	1.9422
15	2.0268	2.0569	2.0268	2.0569	2.0639	2.0639	2.051	2.051	2.095	1.8984	2.118	2.1754	2.118	2.0966	2.1551	2.1551	2.0166	2.0166	1.944	1.944	1.9582	1.9697	2.1118	1.9697	2.0691	2.0656	1.9289	2.1132	2.0691	2.0183	2.0183	1.9534	2.1067	2.1067	1.9272	1.9272	1.8753	1.8753	2.1413	2.1413	1.895	2.0517	2.0517	2.1014	1.9838	1.9941	1.9941	1.9838	1.9574
16.5	2.0442	2.064	2.0442	2.064	2.087	2.087	2.0719	2.0719	2.105	1.9181	2.1181	2.1916	2.1181	2.0929	2.148	2.148	2.0438	2.0438	1.9676	1.9676	1.9749	1.9854	2.1249	1.9854	2.0541	2.0752	1.9396	2.0935	2.0541	2.0315	2.0315	1.9745	2.1218	2.1218	1.9594	1.9594	1.8941	1.8941	2.1336	2.1336	1.9459	2.0538	2.0538	2.1179	1.9894	2.0092	2.0092	1.9894	1.9731
18	2.0574	2.0648	2.0574	2.0648	2.1088	2.1088	2.0916	2.0916	2.1109	1.9354	2.1159	2.1896	2.1159	2.0856	2.1467	2.1467	2.0682	2.0682	1.9948	1.9948	1.9995	2.0131	2.1411	2.0131	2.0609	2.0883	1.9642	2.1127	2.0609	1.9957	1.9957	2.015	2.1375	2.1375	1.9757	1.9757	1.9194	1.9194	2.1432	2.1432	1.9908	2.0677	2.0677	2.1227	1.9884	2.0201	2.0201	1.9884	1.9923
19.5	2.0704	2.0751	2.0704	2.0751	2.1287	2.1287	2.1099	2.1099	2.1313	1.965	2.116	2.199	2.116	2.081	2.1462	2.1462	2.0925	2.0925	2.0181	2.0181	2.0314	2.0264	2.1511	2.0264	2.0541	2.0952	1.9705	2.1601	2.0541	1.9827	1.9827	2.0123	2.1566	2.1566	1.9959	1.9959	1.9446	1.9446	2.1419	2.1419	2.0309	2.0801	2.0801	2.1179	1.9986	2.0375	2.0375	1.9986	2.0049
21	2.0686	2.0777	2.0686	2.0777	2.1395	2.1395	2.1254	2.1254	2.1418	1.989	2.1168	2.2094	2.1168	2.0767	2.1509	2.1509	2.1186	2.1186	2.0476	2.0476	2.0626	2.0408	2.0144	2.0408	2.0603	2.1109	1.9846	2.1681	2.0603	1.997	1.997	2.0427	2.1759	2.1759	2.0258	2.0258	1.9569	1.9569	2.1419	2.1419	2.0574	2.0874	2.0874	2.1176	2.0108	2.0749	2.0749	2.0108	2.0283
22.5	2.0761	2.0825	2.0761	2.0825	2.1383	2.1383	2.0985	2.1358	2.147	2.0102	2.1177	2.2137	2.1177	2.0763	2.1529	2.1529	2.1415	2.1415	2.0714	2.0714	2.0953	2.0508	1.9555	2.0508	2.0479	2.1222	1.9996	2.1462	2.0479	2.0127	2.0127	2.0361	2.1863	2.1863	2.06	2.06	1.9756	1.9756	2.146	2.146	2.0832	2.08	2.08	2.1258	2.0331	2.1062	2.1062	2.0331	2.0496
24	2.0794	2.0866	2.0794	2.0866	2.1237	2.1237	2.1141	2.149	2.0805	2.032	2.1194	2.215	2.1194	2.0765	2.1539	2.1539	2.1708	2.1708	2.0882	2.0882	2.1219	2.06	1.9637	2.06	2.0518	2.13	2.0192	2.1605	2.0518	2.0372	2.0372	2.0201	2.197	2.197	2.1014	2.1014	1.9966	1.9966	2.1459	2.1459	2.1054	2.0796	2.0796	2.1388	2.0587	2.1414	2.1414	2.0587	2.0667
25.5	2.0992	2.0232	2.0758	2.0187	2.1352	2.0656	2.1056	2.1433	2.1134	2.0578	2.1263	2.2111	2.1263	2.0733	2.1553	2.1553	2.1822	2.1822	2.113	2.113	2.153	2.0794	1.9761	2.0794	2.0445	2.129	2.0481	2.1699	2.0445	2.0653	2.0653	1.9977	2.207	2.207	2.14	2.14	2.0187	2.0187	2.157	2.157	2.1168	2.0815	2.0815	2.158	2.0903	2.1792	2.1792	2.0903	2.0939
27	2.1144	2.0597	2.0806	2.0487	2.1118	2.0441	2.1071	2.1504	2.0969	2.0775	2.1309	2.2087	2.1309	2.0673	2.1505	2.1505	2.1978	2.1978	2.1334	2.1334	2.1778	2.0906	2.0838	2.0906	2.0432	2.0212	2.058	2.1788	2.0432	2.0771	2.0771	1.9902	2.2129	2.2129	2.1432	2.1432	2.0387	2.0387	2.1711	2.1711	2.0699	2.0866	2.0866	2.1701	2.0834	2.2114	2.2114	2.0834	2.1151
28.5	2.1122	2.047	2.0819	2.0312	2.0983	2.0176	2.1082	2.1572	2.0942	2.0645	2.1359	2.2008	2.1359	2.0666	2.1491	2.1491	2.1869	2.1282	2.1118	2.1118	2.1701	2.0925	2.2113	2.0925	2.0489	2.0745	2.0327	2.2007	2.0489	2.1044	2.1044	1.9891	2.213	2.213	2.1611	2.1752	2.0672	2.0672	2.1891	2.1891	2.0586	2.107	2.107	2.12	2.1445	2.2447	2.2447	2.1019	2.1438
30	2.1191	2.0423	2.0842	2.0172	2.0849	1.9943	2.1084	2.1665	2.0965	2.0465	2.1401	2.1932	2.1401	2.0682	2.15	2.15	2.2079	2.1536	2.1568	2.1105	2.208	2.0863	2.0115	2.0863	2.0132	2.0367	2.071	2.2051	2.0132	2.1099	2.1099	1.9808	2.2169	2.2169	2.1685	2.1775	2.0935	2.0935	2.2135	2.2135	2.0425	2.1089	2.1089	2.1458	2.1542	2.2258	2.2167	2.105	2.1017
31.5	2.1184	2.0419	2.0893	1.9964	2.0755	1.9645	2.1107	2.173	2.0973	2.0903	2.1465	2.1961	2.1465	2.0732	2.1532	2.1532	2.1871	2.1522	2.1579	2.1065	2.2121	2.0209	2.0181	2.0209	2.0181	2.0231	2.0798	2.2894	2.0165	2.1195	2.1195	2.1405	2.2253	2.2253	2.1599	2.1702	2.1127	2.1127	2.2337	2.2337	2.0317	2.0924	2.0924	2.1373	2.1631	2.2565	2.2357	2.1053	2.107
33	2.1207	2.0366	2.0917	1.9779	2.0629	1.9345	2.105	2.1902	2.1002	2.068	2.1596	2.2025	2.1596	2.079	2.1543	2.1543	2.1762	2.1512	2.1534	2.106	2.209	1.9834	2.0413	1.9977	1.9993	2.0196	2.0741	2.3834	2.0047	2.1278	2.1278	2.1728	2.2293	2.2293	2.1542	2.1738	2.1484	2.1484	2.2554	2.2554	2.0273	2.1307	2.078	2.1149	2.1744	2.2647	2.2546	2.1175	2.1024
34.5	2.1324	2.0369	2.0984	1.9673	2.0556	1.9246	2.091	2.193	2.1012	2.0653	2.1749	2.2098	2.1749	1.994	2.1578	2.1578	2.1729	2.15	2.1429	2.0971	2.2055	1.9949	2.06	2.0752	1.987	2.0232	2.0776	2.2578	1.9884	2.1225	2.1225	2.1664	2.2306	2.2306	2.1408	2.1694	2.068	2.1093	2.2743	2.2743	2.0286	2.1407	2.0687	2.123	2.183	2.2745	2.2516	2.1224	2.0872
36	2.1452	2.0409	2.1061	1.9554	2.0513	1.912	2.0884	2.1848	2.0999	2.0568	2.181	2.2207	2.181	2.07	2.1483	2.1483	2.1535	2.1512	2.1364	2.1037	2.1965	1.9642	2.0534	2.051	1.9823	2.0015	2.0681	2.2742	1.9727	2.1075	2.1075	2.1747	2.2267	2.1855	2.1337	2.1598	2.0555	2.0988	2.2461	2.2499	2.0325	2.1356	2.0849	2.1276	2.1871	2.2747	2.2564	2.122	2.0846
37.5	2.1582	2.045	2.1063	1.9446	2.0514	1.908	2.0876	2.1902	2.0997	2.0553	2.1612	2.2262	2.1612	2.0556	2.1106	2.1204	2.1368	2.158	2.131	2.1075	2.1797	1.9633	2.0523	2.0477	1.994	1.9927	2.0713	2.2796	1.976	2.1074	2.1074	2.1848	2.2151	2.1724	2.1215	2.1547	2.037	2.074	2.2339	2.2351	2.0315	2.1323	2.0731	2.1372	2.1972	2.2907	2.2771	2.1403	2.077
39	2.1736	2.0499	2.1089	1.9397	2.0522	1.9095	2.0964	2.1917	2.1373	2.0568	2.1538	2.1804	2.1577	2.0433	2.095	2.1144	2.1361	2.1682	2.1264	2.114	2.1905	1.967	2.0278	2.0452	2.0039	1.9829	2.0669	2.291	1.9747	2.1118	2.0476	2.0972	2.2056	2.1579	2.1207	2.1504	2.019	2.0757	2.2285	2.2059	2.0416	2.1357	2.0935	2.1361	2.2071	2.2944	2.2869	2.1442	2.0961
[truncated: 51 more columns]

## Sheet: Fig2I-mRuby
	without prior 100 uW/8hrs treatment						with prior 100 uW/8hrs treatment
log10(mRuby)	0 uW	10 uW	15 uW	25 uW	40 uW	100 uW	0 uW	10 uW	15 uW	25 uW	40 uW	100 uW
1	0.00015931	0.1	0.2	0.30002	0.4	0.5	0	0.1	0.2	0.3	0.4	0.5
1.1	0	0.1	0.2	0.3	0.4	0.5	0	0.1	0.2	0.3	0.4	0.5
1.2	1.9913e-05	0.10002	0.2	0.3	0.40002	0.5	0	0.1	0.2	0.3	0.4	0.5
1.3	3.9826e-05	0.1	0.20002	0.3	0.4	0.5	1.9782e-05	0.1	0.2	0.30004	0.4	0.5
1.4	0.00011948	0.1	0.2	0.3	0.4	0.5	1.9782e-05	0.1	0.2	0.3	0.4	0.5
1.5	3.9826e-05	0.1	0.20007	0.3	0.40002	0.50003	0	0.1	0.2	0.30004	0.4	0.50002
1.6	0.00013939	0.10006	0.20002	0.3	0.4	0.5	0	0.1	0.2	0.30004	0.4	0.5
1.7	0.00015931	0.10011	0.20002	0.30002	0.40002	0.5	0	0.1	0.2	0.3	0.40002	0.5
1.8	0.00017922	0.10015	0.20007	0.30004	0.4	0.5	1.9782e-05	0.1	0.20004	0.3	0.4	0.5
1.9	0.00053766	0.10019	0.20019	0.30009	0.4	0.5	7.9128e-05	0.10006	0.20008	0.3	0.4	0.5
2	0.0012147	0.10023	0.20024	0.30015	0.40004	0.50003	9.891e-05	0.10006	0.20004	0.30004	0.40004	0.50002
2.1	0.002987	0.10102	0.20068	0.30046	0.4002	0.50005	0.00013847	0.10014	0.2001	0.30016	0.40009	0.50002
2.2	0.0074475	0.10195	0.20153	0.30064	0.40045	0.5001	0.00031651	0.10024	0.20036	0.30045	0.40022	0.50012
2.3	0.020292	0.10604	0.20394	0.30278	0.40081	0.50024	0.0017804	0.10116	0.20113	0.30116	0.4005	0.50039
2.4	0.056076	0.11569	0.21096	0.30773	0.40231	0.50084	0.0053411	0.10327	0.20342	0.30299	0.40133	0.50056
2.5	0.13326	0.13759	0.22982	0.31741	0.40578	0.50178	0.013017	0.109	0.20861	0.30802	0.4028	0.50148
2.6	0.24354	0.17206	0.26259	0.33566	0.41087	0.50257	0.032245	0.11892	0.21954	0.31586	0.40592	0.50225
2.7	0.28149	0.2016	0.28511	0.34963	0.41449	0.50461	0.062412	0.13256	0.23571	0.32685	0.40953	0.50363
2.8	0.17615	0.20245	0.28946	0.35381	0.41734	0.50487	0.096141	0.14629	0.24726	0.33581	0.41224	0.50377
2.9	0.059959	0.18187	0.27987	0.35024	0.41649	0.50534	0.12039	0.15667	0.25362	0.34201	0.41457	0.50322
3	0.012725	0.16859	0.26703	0.3447	0.41759	0.50513	0.13094	0.16074	0.25667	0.34331	0.41575	0.50452
3.1	0.0022303	0.15876	0.26181	0.34372	0.41848	0.50542	0.12886	0.16308	0.25784	0.34441	0.41665	0.50409
3.2	0.00057748	0.15502	0.2594	0.34564	0.42169	0.50642	0.12395	0.16832	0.26144	0.35294	0.4194	0.50491
3.3	0.00031861	0.15326	0.25895	0.34759	0.42583	0.50854	0.10635	0.17329	0.2639	0.35482	0.42314	0.50643
3.4	0.00019913	0.15089	0.25487	0.35048	0.42993	0.51026	0.081561	0.17533	0.26555	0.35952	0.42904	0.50808
3.5	3.9826e-05	0.14688	0.25357	0.35252	0.43553	0.51322	0.050246	0.17152	0.26547	0.36	0.43266	0.51023
3.6	3.9826e-05	0.14417	0.25093	0.35563	0.43956	0.5177	0.02631	0.16906	0.26372	0.36231	0.44127	0.5133
3.7	3.9826e-05	0.13873	0.24762	0.35751	0.44675	0.52351	0.012126	0.1621	0.26048	0.36311	0.44496	0.51891
3.8	0	0.1346	0.24011	0.35966	0.45231	0.53087	0.004629	0.15701	0.25494	0.36289	0.4529	0.5247
3.9	1.9913e-05	0.1299	0.23546	0.35692	0.4619	0.53873	0.0017804	0.14866	0.25169	0.36221	0.4614	0.53423
4	0	0.12626	0.22847	0.35397	0.46797	0.5508	0.00063302	0.14305	0.2472	0.35893	0.46878	0.54629
4.1	0	0.12016	0.22184	0.34816	0.47532	0.56308	0.00023738	0.13537	0.24177	0.3527	0.47494	0.5589
4.2	0	0.11501	0.21721	0.34251	0.47368	0.5772	9.891e-05	0.12852	0.23537	0.34672	0.47791	0.56995
4.3	0	0.1118	0.21195	0.33379	0.47418	0.58785	0.00013847	0.12387	0.22748	0.33783	0.47636	0.58258
4.4	0	0.10858	0.20911	0.32773	0.46815	0.59621	9.891e-05	0.11761	0.22223	0.32966	0.47136	0.59409
4.5	0	0.10627	0.20581	0.32072	0.45865	0.59288	1.9782e-05	0.11267	0.21766	0.32401	0.46094	0.59943
4.6	0	0.10373	0.20458	0.31594	0.45047	0.5877	0	0.10784	0.21296	0.31666	0.45342	0.59547
4.7	0	0.10265	0.20342	0.31067	0.43963	0.58034	0	0.10555	0.20921	0.31283	0.44385	0.58652
4.8	0	0.10178	0.20189	0.30635	0.43083	0.56795	0	0.10365	0.20674	0.30907	0.43284	0.57791
4.9	0	0.10106	0.20071	0.30383	0.42043	0.55035	0	0.1019	0.20384	0.30551	0.42465	0.56216
5	0	0.10036	0.20033	0.30186	0.41181	0.53299	0	0.10136	0.20181	0.30361	0.4149	0.54126
5.1	0	0.10028	0.20017	0.30096	0.40625	0.51815	0	0.10062	0.20125	0.30188	0.40881	0.52206
5.2	0	0.10023	0.20012	0.3002	0.40271	0.50898	0	0.10038	0.2005	0.30103	0.40433	0.51171
5.3	0	0.10002	0.20002	0.3002	0.40105	0.50325	0	0.1001	0.20016	0.30049	0.40166	0.50443
5.4	0	0.1	0.2	0.3	0.40029	0.50162	0	0.10002	0.2001	0.30008	0.40063	0.50157
5.5	0	0.1	0.2	0.30002	0.40016	0.50031	0	0.10002	0.20008	0.3	0.40017	0.5006
5.6	0	0.1	0.2	0.3	0.4	0.50005	0	0.1	0.20002	0.30002	0.4	0.50017
5.7	0	0.1	0.2	0.3	0.4	0.50003	0	0.1	0.2	0.3	0.4	0.50002
5.8	0	0.1	0.2	0.3	0.4	0.5	0	0.1	0.2	0.3	0.40002	0.5
5.9	0	0.1	0.2	0.3	0.4	0.5	0	0.1	0.2	0.3	0.4	0.5
6	0	0.1	0.2	0.3	0.4	0.5	0	0.1	0.2	0.3	0.4	0.5
6.1	0	0.1	0.2	0.3	0.4	0.5	0	0.1	0.2	0.3	0.4	0.5
6.2	0	0.1	0.2	0.3	0.4	0.5	0	0.1	0.2	0.3	0.4	0.5
6.3	0	0.1	0.2	0.3	0.4	0.5	0	0.1	0.2	0.3	0.4	0.5
6.4	0	0.1	0.2	0.3	0.4	0.5	0	0.1	0.2	0.3	0.4	0.5
6.5	0	0.1	0.2	0.3	0.4	0.5	0	0.1	0.2	0.3	0.4	0.5
6.6	0	0.1	0.2	0.3	0.4	0.5	0	0.1	0.2	0.3	0.4	0.5
6.7	0	0.1	0.2	0.3	0.4	0.5	0	0.1	0.2	0.3	0.4	0.5
6.8	0	0.1	0.2	0.3	0.4	0.5	0	0.1	0.2	0.3	0.4	0.5
6.9	0	0.1	0.2	0.3	0.4	0.5	0	0.1	0.2	0.3	0.4	0.5
7	0	0.1	0.2	0.3	0.4	0.5	0	0.1	0.2	0.3	0.4	0.5
7.1	0	0.1	0.2	0.3	0.4	0.5	0	0.1	0.2	0.3	0.4	0.5
7.2	0	0.1	0.2	0.3	0.4	0.5	0	0.1	0.2	0.3	0.4	0.5
7.3	0	0.1	0.2	0.3	0.4	0.5	0	0.1	0.2	0.3	0.4	0.5
7.4	0	0.1	0.2	0.3	0.4	0.5	0	0.1	0.2	0.3	0.4	0.5
7.5	0	0.1	0.2	0.3	0.4	0.5	0	0.1	0.2	0.3	0.4	0.5
7.6	0	0.1	0.2	0.3	0.4	0.5	0	0.1	0.2	0.3	0.4	0.5
7.7	0	0.1	0.2	0.3	0.4	0.5	0	0.1	0.2	0.3	0.4	0.5
7.8	0	0.1	0.2	0.3	0.4	0.5	0	0.1	0.2	0.3	0.4	0.5
7.9	0	0.1	0.2	0.3	0.4	0.5	0	0.1	0.2	0.3	0.4	0.5
8	0	0.1	0.2	0.3	0.4	0.5	0	0.1	0.2	0.3	0.4	0.5

## Sheet: Fig2J-mCardinal-PEST
	without prior 100 uW/8hrs treatment						with prior 100 uW/8hrs treatment
log10(mCardinal)	0 uW	10 uW	15 uW	25 uW	40 uW	100 uW	0 uW	10 uW	15 uW	25 uW	40 uW	100 uW
1	0.00023896	0.10011	0.20007	0.30009	0.4	0.5	5.9346e-05	0.10008	0.20004	0.30002	0.4	0.5
1.1	5.974e-05	0.10002	0.2	0.3	0.40002	0.5	0	0.1	0.2	0.3	0.4	0.5
1.2	7.9653e-05	0.10002	0.20005	0.30002	0.4	0.50003	0	0.1	0.20002	0.3	0.4	0.50002
1.3	9.9566e-05	0.10004	0.20005	0.30002	0.4	0.5	1.9782e-05	0.1	0.20002	0.3	0.40002	0.5
1.4	5.974e-05	0.10006	0.20005	0.30004	0.4	0.5	1.9782e-05	0.10004	0.20002	0.30002	0.4	0.5
1.5	0.00019913	0.10008	0.20007	0.30002	0.40002	0.5	3.9564e-05	0.10002	0.2	0.30002	0.4	0.5
1.6	0.00019913	0.10006	0.20005	0.30007	0.40002	0.5	0	0.1	0.2	0.30004	0.4	0.5
1.7	0.0002987	0.10015	0.2	0.30004	0.4	0.5	1.9782e-05	0.10006	0.20004	0.30004	0.4	0.5
1.8	0.00041818	0.10013	0.20009	0.30009	0.40009	0.50003	1.9782e-05	0.10006	0.20002	0.30002	0.40004	0.50005
1.9	0.00043809	0.10028	0.20007	0.30011	0.40002	0.50003	3.9564e-05	0.1	0.2	0.3	0.4	0.50002
2	0.00065713	0.10019	0.20009	0.30011	0.40002	0.50003	3.9564e-05	0.10014	0.20008	0.30002	0.40002	0.5
2.1	0.00065713	0.10023	0.20024	0.30018	0.40002	0.50005	7.9128e-05	0.10014	0.20004	0.30006	0.40004	0.50005
2.2	0.00099566	0.10047	0.20014	0.30022	0.40011	0.50005	1.9782e-05	0.10012	0.20006	0.30002	0.40004	0.50005
2.3	0.00099566	0.10057	0.20031	0.30024	0.40011	0.50003	0.00015826	0.1001	0.20012	0.30012	0.40002	0.50002
2.4	0.0014138	0.10042	0.20035	0.30039	0.40016	0.50005	0.00027695	0.10026	0.20008	0.30008	0.40007	0.50002
2.5	0.0015731	0.10066	0.20076	0.30039	0.40009	0.50003	0.00017804	0.10006	0.20022	0.30029	0.40007	0.50007
2.6	0.0023697	0.10121	0.20059	0.30057	0.40016	0.50003	0.00037586	0.10018	0.20028	0.30019	0.40011	0.50007
2.7	0.0029073	0.10131	0.20111	0.30059	0.40027	0.50005	0.00031651	0.10036	0.2002	0.30025	0.40013	0.50022
2.8	0.0043012	0.10161	0.20151	0.30131	0.40045	0.50021	0.00073193	0.10048	0.20046	0.30047	0.40015	0.50015
2.9	0.0058744	0.10271	0.20191	0.30131	0.40054	0.50026	0.00073193	0.10062	0.20044	0.30035	0.4002	0.50012
3	0.0095782	0.10379	0.20302	0.30197	0.40065	0.50034	0.0013056	0.1011	0.20087	0.30082	0.40046	0.50022
3.1	0.014357	0.10551	0.20505	0.30326	0.40099	0.50045	0.0018991	0.10162	0.20145	0.30151	0.40066	0.50041
3.2	0.023856	0.1094	0.20682	0.30521	0.40211	0.50052	0.0034025	0.10267	0.2027	0.3021	0.40092	0.50034
3.3	0.040981	0.11622	0.21282	0.30839	0.40296	0.501	0.0060929	0.10421	0.20408	0.30361	0.40142	0.50089
3.4	0.069816	0.12975	0.22226	0.31518	0.40459	0.50181	0.011098	0.10782	0.20875	0.30695	0.40229	0.50099
3.5	0.11187	0.14686	0.23896	0.32644	0.40856	0.50228	0.022077	0.11451	0.21443	0.31211	0.40439	0.50196
3.6	0.17478	0.17503	0.26235	0.33995	0.41322	0.50361	0.039564	0.12441	0.22475	0.31961	0.40695	0.50232
3.7	0.21186	0.19883	0.28875	0.35362	0.41626	0.50495	0.071571	0.13765	0.2403	0.32952	0.41066	0.50372
3.8	0.18551	0.20554	0.30051	0.355	0.4192	0.50539	0.10898	0.15465	0.25261	0.33884	0.41256	0.50375
3.9	0.10168	0.19021	0.28925	0.34709	0.41718	0.50458	0.14453	0.16707	0.26187	0.34445	0.41363	0.50399
4	0.027002	0.16501	0.26797	0.34387	0.41609	0.505	0.15869	0.17058	0.26166	0.34748	0.41663	0.50363
4.1	0.0035047	0.15099	0.25742	0.33901	0.41597	0.50542	0.1489	0.17106	0.26265	0.3454	0.41595	0.50365
4.2	0.00043809	0.14242	0.24972	0.33719	0.41839	0.50592	0.11432	0.1695	0.25929	0.34717	0.41768	0.50414
4.3	0.00043809	0.14178	0.248	0.33855	0.4205	0.50752	0.08073	0.16308	0.25571	0.34734	0.41846	0.50566
4.4	9.9566e-05	0.13987	0.2471	0.34113	0.42415	0.50867	0.047892	0.16264	0.25392	0.34857	0.4227	0.50568
4.5	7.9653e-05	0.13863	0.24599	0.34442	0.4278	0.51045	0.023699	0.15998	0.2539	0.35076	0.42637	0.5083
4.6	7.9653e-05	0.13968	0.24413	0.34994	0.43354	0.51422	0.0081106	0.15659	0.25384	0.35226	0.42908	0.51074
4.7	9.9566e-05	0.13632	0.24165	0.3527	0.43977	0.51888	0.0023936	0.15397	0.25132	0.35394	0.43839	0.51376
4.8	3.9826e-05	0.13363	0.23931	0.35885	0.44779	0.52524	0.00092975	0.15142	0.25042	0.35647	0.44405	0.52061
4.9	1.9913e-05	0.1321	0.23414	0.36001	0.45576	0.53566	0.00037586	0.14964	0.25104	0.36041	0.45394	0.53069
5	3.9826e-05	0.12808	0.22916	0.36056	0.46804	0.55219	0.00015826	0.14453	0.25006	0.3634	0.46607	0.544
5.1	1.9913e-05	0.12128	0.22288	0.35749	0.48343	0.56853	0.00013847	0.13958	0.24651	0.36357	0.47815	0.5611
5.2	0	0.1166	0.2158	0.35338	0.4934	0.5955	0	0.13291	0.24505	0.36128	0.48951	0.5842
5.3	1.9913e-05	0.11046	0.20973	0.34319	0.49978	0.62331	0	0.12495	0.23615	0.35402	0.50728	0.61965
5.4	0	0.10665	0.20538	0.32882	0.49515	0.64392	0	0.11547	0.22565	0.33975	0.50916	0.64933
5.5	0	0.10277	0.20241	0.31662	0.48029	0.64719	1.9782e-05	0.10898	0.21678	0.32566	0.4943	0.66104
5.6	0	0.10136	0.20118	0.3078	0.45374	0.60815	0	0.10423	0.20744	0.31287	0.46362	0.63112
5.7	0	0.10047	0.20045	0.30304	0.42469	0.56086	0	0.1016	0.20308	0.30545	0.43454	0.57348
5.8	0	0.10028	0.20021	0.30114	0.40945	0.52561	0	0.10056	0.20105	0.30169	0.41322	0.53311
5.9	0	0.10013	0.20005	0.30033	0.40334	0.50859	0	0.10018	0.20032	0.30058	0.40428	0.51161
6	0	0.10002	0.20002	0.30004	0.40078	0.50267	0	0.10008	0.2001	0.30027	0.40107	0.50319
6.1	0	0.1	0.2	0.3	0.40016	0.50058	0	0.10002	0.20004	0.30012	0.40039	0.50126
6.2	0	0.1	0.2	0.3	0.40018	0.5001	0	0.10002	0.20004	0.3	0.40017	0.50044
6.3	0	0.1	0.2	0.3	0.4	0.5	0	0.1	0.20002	0.3	0.40007	0.50015
6.4	0	0.1	0.2	0.3	0.4	0.50005	0	0.1	0.2	0.3	0.40002	0.5
6.5	0	0.1	0.2	0.3	0.4	0.5	0	0.1	0.2	0.3	0.4	0.5
6.6	0	0.1	0.2	0.3	0.4	0.5	0	0.1	0.2	0.3	0.40002	0.5
6.7	0	0.1	0.2	0.3	0.4	0.5	0	0.1	0.2	0.3	0.4	0.5
6.8	0	0.1	0.2	0.3	0.4	0.5	0	0.1	0.2	0.3	0.4	0.5
6.9	0	0.1	0.2	0.3	0.4	0.5	0	0.1	0.2	0.3	0.4	0.5
7	0	0.1	0.2	0.3	0.4	0.5	0	0.1	0.2	0.3	0.4	0.5
7.1	0	0.1	0.2	0.3	0.4	0.5	0	0.1	0.2	0.3	0.4	0.5
7.2	0	0.1	0.2	0.3	0.4	0.5	0	0.1	0.2	0.3	0.4	0.5
7.3	0	0.1	0.2	0.3	0.4	0.5	0	0.1	0.2	0.3	0.4	0.5
7.4	0	0.1	0.2	0.3	0.4	0.5	0	0.1	0.2	0.3	0.4	0.5
7.5	0	0.1	0.2	0.3	0.4	0.5	0	0.1	0.2	0.3	0.4	0.5
7.6	0	0.1	0.2	0.3	0.4	0.5	0	0.1	0.2	0.3	0.4	0.5
7.7	0	0.1	0.2	0.3	0.4	0.5	0	0.1	0.2	0.3	0.4	0.5
7.8	0	0.1	0.2	0.3	0.4	0.5	0	0.1	0.2	0.3	0.4	0.5
7.9	0	0.1	0.2	0.3	0.4	0.5	0	0.1	0.2	0.3	0.4	0.5
8	0	0.1	0.2	0.3	0.4	0.5	0	0.1	0.2	0.3	0.4	0.5
