# Supplementary material for: Quantitative control of noise in mammalian gene expression by dynamic histone regulation
Source: eLife. 2021 Aug 11;10:e65654. doi: 10.7554/eLife.65654 (PMC8357418; doi:10.7554/eLife.65654)
Supplement: Figure 3—figure supplement 2—source data 1. [file elife-65654-fig3-figsupp2-data1.xlsx]

## Sheet: Fig3S2
0	0.0001	0.10008	0.20004	0.30002	0.40002	0.5	0.6
0.05	0	0.1	0.2	0.3	0.4	0.5	0.6
0.1	0	0.1	0.2	0.3	0.4	0.5	0.6
0.15	0	0.1	0.2	0.3	0.4	0.5	0.6
0.2	0	0.1	0.2	0.3	0.4	0.5	0.6
0.25	0	0.1	0.2	0.3	0.4	0.5	0.6
0.3	2e-05	0.10002	0.20002	0.30002	0.4	0.5	0.6
0.35	0	0.1	0.2	0.3	0.4	0.50002	0.6
0.4	2e-05	0.10002	0.2	0.3	0.4	0.5	0.6
0.45	2e-05	0.1	0.2	0.3	0.4	0.5	0.6
0.5	0.0001	0.1001	0.20004	0.30002	0.4	0.5	0.6
0.55	6e-05	0.10004	0.20002	0.3	0.4	0.5	0.6
0.6	6e-05	0.10004	0.20004	0.30002	0.4	0.5	0.6
0.65	4e-05	0.10004	0.2	0.3	0.4	0.5	0.6
0.7	6e-05	0.10006	0.20006	0.30004	0.40002	0.5	0.6
0.75	0	0.1	0.2	0.3	0.4	0.5	0.6
0.8	6e-05	0.10004	0.20002	0.3	0.40002	0.5	0.6
0.85	0.0001	0.1001	0.2001	0.3	0.4	0.5	0.6
0.9	0.0001	0.10008	0.20006	0.3	0.4	0.5	0.6
0.95	0.00018	0.10014	0.2001	0.30006	0.40002	0.5	0.6
1	0.00024	0.1002	0.20012	0.30002	0.40002	0.5	0.6
1.05	0.0002	0.1002	0.20018	0.30004	0.40004	0.5	0.6
1.1	0.00024	0.10024	0.20016	0.3	0.4	0.5	0.6
1.15	0.00036	0.10032	0.20014	0.30002	0.4	0.5	0.6
1.2	0.00032	0.10026	0.20016	0.30004	0.4	0.5	0.6
1.25	0.00076	0.10066	0.20032	0.30006	0.4	0.50002	0.6
1.3	0.00074	0.10066	0.20034	0.30004	0.4	0.5	0.6
1.35	0.00094	0.10084	0.20052	0.3002	0.40006	0.5	0.6
1.4	0.00118	0.10102	0.20078	0.30018	0.40002	0.5	0.6
1.45	0.00192	0.10168	0.201	0.30028	0.40004	0.5	0.6
1.5	0.0023	0.10204	0.20126	0.30034	0.40006	0.5	0.6
1.55	0.00312	0.10264	0.20136	0.30036	0.40002	0.5	0.6
1.6	0.00404	0.1037	0.2021	0.3006	0.40004	0.5	0.60002
1.65	0.00502	0.10436	0.2027	0.30066	0.40006	0.5	0.6
1.7	0.00738	0.10638	0.20378	0.30128	0.4003	0.5	0.6
1.75	0.00918	0.10782	0.2045	0.30116	0.40012	0.50002	0.6
1.8	0.01224	0.11074	0.20622	0.30178	0.4003	0.5	0.6
1.85	0.01736	0.1154	0.2092	0.302	0.40028	0.5	0.6
1.9	0.02564	0.12252	0.21334	0.30366	0.40068	0.50002	0.60002
1.95	0.03042	0.12646	0.21608	0.30416	0.40072	0.5	0.6
2	0.04234	0.13714	0.22206	0.30592	0.40134	0.5	0.6
2.05	0.0546	0.14788	0.22916	0.30764	0.40116	0.5	0.60002
2.1	0.07068	0.16242	0.23778	0.31006	0.4016	0.5	0.60004
2.15	0.09448	0.18224	0.24934	0.31262	0.40148	0.50004	0.6
2.2	0.11224	0.20026	0.25964	0.31452	0.40228	0.5	0.6
2.25	0.1364	0.22052	0.2715	0.31922	0.40316	0.50004	0.60002
2.3	0.16328	0.24464	0.2861	0.32254	0.4033	0.50006	0.60006
2.35	0.18136	0.25988	0.29506	0.32408	0.40372	0.50006	0.6
2.4	0.19402	0.2708	0.3021	0.32782	0.404	0.50002	0.60006
2.45	0.19406	0.27062	0.30134	0.3273	0.40468	0.5001	0.60004
2.5	0.1806	0.25866	0.2946	0.32438	0.40378	0.50006	0.60002
2.55	0.15716	0.2387	0.28412	0.32216	0.40318	0.50004	0.60002
2.6	0.11832	0.20364	0.26234	0.31608	0.40304	0.50004	0.6
2.65	0.08334	0.17324	0.24476	0.31226	0.4021	0.50014	0.60006
2.7	0.04876	0.14338	0.22652	0.3082	0.40156	0.50014	0.6001
2.75	0.02672	0.12436	0.21578	0.30494	0.40124	0.50012	0.60004
2.8	0.0112	0.11034	0.20758	0.3035	0.40116	0.50028	0.6001
2.85	0.00454	0.10488	0.20486	0.30336	0.4015	0.50016	0.60008
2.9	0.0011	0.10188	0.20378	0.30336	0.40156	0.50022	0.60008
2.95	0.0002	0.10194	0.20474	0.30466	0.40238	0.50038	0.60014
3	8e-05	0.10202	0.20602	0.30568	0.40284	0.50032	0.60008
3.05	0	0.10228	0.20788	0.30762	0.40318	0.50046	0.6002
3.1	0	0.10322	0.2107	0.31084	0.40498	0.50074	0.60024
3.15	0	0.10406	0.21466	0.3151	0.40628	0.50104	0.60034
3.2	0	0.10642	0.21946	0.31914	0.40898	0.50112	0.60032
3.25	0	0.10716	0.2247	0.32514	0.41118	0.5012	0.60056
3.3	0	0.1095	0.23168	0.33186	0.41494	0.50202	0.60062
3.35	0	0.11314	0.24144	0.34188	0.42006	0.50226	0.60082
3.4	0	0.11464	0.24722	0.34946	0.42396	0.50288	0.60098
3.45	0	0.11784	0.25866	0.36166	0.42996	0.50436	0.6012
3.5	0	0.1199	0.26768	0.37464	0.43752	0.50574	0.60156
3.55	0	0.1214	0.27362	0.38306	0.44482	0.50716	0.60214
3.6	0	0.1216	0.27568	0.3907	0.45384	0.50972	0.60278
3.65	0	0.12124	0.2761	0.39806	0.46156	0.51246	0.60442
3.7	0	0.1198	0.27368	0.40538	0.47464	0.51802	0.6053
3.75	0	0.11596	0.26364	0.40386	0.48284	0.52308	0.60804
3.8	0	0.11214	0.25412	0.40566	0.49514	0.5292	0.60978
3.85	0	0.10836	0.2455	0.40528	0.50372	0.53856	0.61442
3.9	0	0.10546	0.23624	0.40422	0.51776	0.54912	0.61772
3.95	0	0.10308	0.22812	0.39926	0.5259	0.56258	0.6241
4	0	0.1017	0.22156	0.3922	0.5304	0.57682	0.63254
4.05	0	0.1012	0.21732	0.3847	0.53104	0.59428	0.64434
4.1	0	0.10068	0.2126	0.37408	0.5319	0.61368	0.65754
4.15	0	0.10042	0.2093	0.36112	0.52516	0.62928	0.67438
4.2	0	0.10018	0.20632	0.34916	0.51524	0.65074	0.69398
4.25	0	0.10012	0.20404	0.33736	0.50146	0.66132	0.7132
4.3	0	0.1001	0.2019	0.32766	0.4852	0.66808	0.73936
4.35	0	0.10002	0.2011	0.31738	0.46678	0.66704	0.7601
4.4	0	0.10002	0.20068	0.31234	0.45204	0.6574	0.77608
4.45	0	0.10002	0.20022	0.30674	0.43472	0.63762	0.78562
4.5	0	0.1	0.2002	0.30374	0.42322	0.61958	0.78832
4.55	0	0.1	0.20002	0.30196	0.41366	0.5932	0.7739
4.6	0	0.1	0.20002	0.30078	0.40752	0.56522	0.7488
4.65	0	0.1	0.2	0.30032	0.4037	0.5436	0.71966
4.7	0	0.1	0.2	0.30014	0.40176	0.52524	0.6857
4.75	0	0.1	0.2	0.3001	0.40074	0.51272	0.65552
4.8	0	0.1	0.2	0.30002	0.40018	0.5065	0.62984
4.85	0	0.1	0.2	0.3	0.40006	0.50246	0.6153
4.9	0	0.1	0.2	0.30002	0.40006	0.50098	0.60652
4.95	0	0.1	0.2	0.3	0.4	0.50016	0.60186
5	0	0.1	0.2	0.3	0.4	0.50006	0.60068
5.05	0	0.1	0.2	0.3	0.4	0.5	0.6002
5.1	0	0.1	0.2	0.3	0.4	0.5	0.60002
5.15	0	0.1	0.2	0.3	0.4	0.5	0.6
5.2	0	0.1	0.2	0.3	0.4	0.5	0.6
5.25	0	0.1	0.2	0.3	0.4	0.5	0.6
5.3	0	0.1	0.2	0.3	0.4	0.5	0.6
5.35	0	0.1	0.2	0.3	0.4	0.5	0.6
5.4	0	0.1	0.2	0.3	0.4	0.5	0.6
5.45	0	0.1	0.2	0.3	0.4	0.5	0.6
5.5	0	0.1	0.2	0.3	0.4	0.5	0.6
5.55	0	0.1	0.2	0.3	0.4	0.5	0.6
5.6	0	0.1	0.2	0.3	0.4	0.5	0.6
5.65	0	0.1	0.2	0.3	0.4	0.5	0.6
5.7	0	0.1	0.2	0.3	0.4	0.5	0.6
5.75	0	0.1	0.2	0.3	0.4	0.5	0.6
5.8	0	0.1	0.2	0.3	0.4	0.5	0.6
5.85	0	0.1	0.2	0.3	0.4	0.5	0.6
5.9	0	0.1	0.2	0.3	0.4	0.5	0.6
5.95	0	0.1	0.2	0.3	0.4	0.5	0.6
6	0	0.1	0.2	0.3	0.4	0.5	0.6
6.05	0	0.1	0.2	0.3	0.4	0.5	0.6
6.1	0	0.1	0.2	0.3	0.4	0.5	0.6
6.15	0	0.1	0.2	0.3	0.4	0.5	0.6
6.2	0	0.1	0.2	0.3	0.4	0.5	0.6
6.25	0	0.1	0.2	0.3	0.4	0.5	0.6
6.3	0	0.1	0.2	0.3	0.4	0.5	0.6
6.35	0	0.1	0.2	0.3	0.4	0.5	0.6
6.4	0	0.1	0.2	0.3	0.4	0.5	0.6
6.45	0	0.1	0.2	0.3	0.4	0.5	0.6
6.5	0	0.1	0.2	0.3	0.4	0.5	0.6
6.55	0	0.1	0.2	0.3	0.4	0.5	0.6
6.6	0	0.1	0.2	0.3	0.4	0.5	0.6
6.65	0	0.1	0.2	0.3	0.4	0.5	0.6
6.7	0	0.1	0.2	0.3	0.4	0.5	0.6
6.75	0	0.1	0.2	0.3	0.4	0.5	0.6
6.8	0	0.1	0.2	0.3	0.4	0.5	0.6
6.85	0	0.1	0.2	0.3	0.4	0.5	0.6
6.9	0	0.1	0.2	0.3	0.4	0.5	0.6
6.95	0	0.1	0.2	0.3	0.4	0.5	0.6
7	0	0.1	0.2	0.3	0.4	0.5	0.6
7.05	0	0.1	0.2	0.3	0.4	0.5	0.6
7.1	0	0.1	0.2	0.3	0.4	0.5	0.6
7.15	0	0.1	0.2	0.3	0.4	0.5	0.6
7.2	0	0.1	0.2	0.3	0.4	0.5	0.6
7.25	0	0.1	0.2	0.3	0.4	0.5	0.6
7.3	0	0.1	0.2	0.3	0.4	0.5	0.6
7.35	0	0.1	0.2	0.3	0.4	0.5	0.6
7.4	0	0.1	0.2	0.3	0.4	0.5	0.6
7.45	0	0.1	0.2	0.3	0.4	0.5	0.6
7.5	0	0.1	0.2	0.3	0.4	0.5	0.6
7.55	0	0.1	0.2	0.3	0.4	0.5	0.6
7.6	0	0.1	0.2	0.3	0.4	0.5	0.6
7.65	0	0.1	0.2	0.3	0.4	0.5	0.6
7.7	0	0.1	0.2	0.3	0.4	0.5	0.6
7.75	0	0.1	0.2	0.3	0.4	0.5	0.6
7.8	0	0.1	0.2	0.3	0.4	0.5	0.6
7.85	0	0.1	0.2	0.3	0.4	0.5	0.6
7.9	0	0.1	0.2	0.3	0.4	0.5	0.6
7.95	0	0.1	0.2	0.3	0.4	0.5	0.6
8	0	0.1	0.2	0.3	0.4	0.5	0.6
