# Supplementary material for: Quantitative control of noise in mammalian gene expression by dynamic histone regulation
Source: eLife. 2021 Aug 11;10:e65654. doi: 10.7554/eLife.65654 (PMC8357418; doi:10.7554/eLife.65654)
Supplement: Figure 3—source data 1. [file elife-65654-fig3-data1.xlsx]

## Sheet: Fig3A
log10(power)	log10(R)-AM		log10(power)	log10(R)-AM+A485		log10(power)	log10(R)-AM+A485+LMK
-1	2.4254		-1	2.3047		-1	2.4471
0.60206	2.4646		0.60206	2.5542		0	2.4476
0.77815	2.5135		0.8451	2.6286		0.60206	2.7038
0.90309	2.5368		1	2.8137		0.8451	2.8904
1	2.5942		1.1761	3.0875		1	3.2998
1.0792	2.7765		1.301	3.2941		1.1761	3.7351
1.1761	3.1189		1.3979	3.3269		1.301	3.9242
1.301	3.216		1.5441	3.3448		1.3979	3.8751
1.6532	3.8799		1.6532	3.3865		1.5441	4.0535
1.8451	4.275		1.7782	3.4539		1.6532	4.1863
2	4.4161		1.9031	3.5516		1.7782	4.3041
			2	3.6428		1.9031	4.4024
						2	4.4162

## Sheet: Fig3B
log10(power)	CV-AM		log10(power)	CV-AM+A485		log10(power)	CV-AM+A485+LMK
-1	0.46012		-1	0.49851		-1	0.47077
0.60206	1.9887		0.60206	1.008		0	0.47566
0.77815	2.5397		0.8451	1.6622		0.60206	1.1276
0.90309	2.5258		1	1.0448		0.8451	1.2956
1	2.7065		1.1761	0.91127		1	1.3025
1.0792	2.3079		1.301	0.81111		1.1761	0.90477
1.1761	1.8387		1.3979	0.77312		1.301	0.79756
1.301	1.7498		1.5441	0.78753		1.3979	0.78746
1.6532	1.257		1.6532	0.74581		1.5441	0.63987
1.8451	0.95384		1.7782	0.7174		1.6532	0.54707
2	0.85		1.9031	0.72323		1.7782	0.47379
			2	0.76107		1.9031	0.43389
						2	0.42947

## Sheet: Fig3C
log10(R)	CV-AM		log10(R)	CV-AM+A485		log10(R)	CV-AM+A485+LMK
2.4254	0.46012		2.3047	0.49851		2.4471	0.47077
2.4646	1.9887		2.5542	1.008		2.4476	0.47566
2.5135	2.5397		2.6286	1.6622		2.7038	1.1276
2.5368	2.5258		2.8137	1.0448		2.8904	1.2956
2.5942	2.7065		3.0875	0.91127		3.2998	1.3025
2.7765	2.3079		3.2941	0.81111		3.7351	0.90477
3.1189	1.8387		3.3269	0.77312		3.9242	0.79756
3.216	1.7498		3.3448	0.78753		3.8751	0.78746
3.8799	1.257		3.3865	0.74581		4.0535	0.63987
4.275	0.95384		3.4539	0.7174		4.1863	0.54707
4.4161	0.85		3.5516	0.72323		4.3041	0.47379
			3.6428	0.76107		4.4024	0.43389
						4.4162	0.42947

## Sheet: Fig3D
log10(R)
1	0.0017257	0.080812	0.16024	0.24054	0.32009	0.4
1.1	0.00047937	0.080244	0.16002	0.24012	0.32002	0.4
1.2	0.0006072	0.080179	0.16014	0.24014	0.32002	0.4
1.3	0.00084689	0.080179	0.16015	0.24019	0.32005	0.4
1.4	0.0011505	0.080341	0.16027	0.24022	0.32007	0.40002
1.5	0.0016299	0.080812	0.16034	0.24039	0.32004	0.4
1.6	0.0024128	0.081185	0.16056	0.24062	0.32014	0.4
1.7	0.0041705	0.082046	0.16079	0.24096	0.32014	0.40002
1.8	0.0066952	0.082939	0.16103	0.24174	0.32027	0.40002
1.9	0.012591	0.085764	0.16196	0.24286	0.32065	0.40002
2	0.023489	0.091122	0.16429	0.24546	0.32097	0.40009
2.1	0.047825	0.10052	0.16853	0.24992	0.32171	0.40023
2.2	0.089866	0.12368	0.17608	0.25862	0.32429	0.40037
2.3	0.15123	0.15834	0.19046	0.27273	0.3279	0.40114
2.4	0.20992	0.20018	0.20851	0.28967	0.33212	0.40189
2.5	0.21696	0.22644	0.2224	0.30159	0.33784	0.403
2.6	0.14496	0.2177	0.23003	0.29922	0.34122	0.40387
2.7	0.061551	0.17865	0.22493	0.29316	0.34145	0.40382
2.8	0.016123	0.14605	0.21745	0.28752	0.34246	0.40417
2.9	0.0037231	0.12816	0.21034	0.28266	0.34338	0.40501
3	0.0010866	0.11553	0.20762	0.2819	0.34452	0.40589
3.1	0.00046339	0.11176	0.2088	0.28212	0.34782	0.40738
3.2	0.00028762	0.10686	0.20731	0.28211	0.35269	0.40922
3.3	9.5874e-05	0.10302	0.20593	0.28334	0.35486	0.41229
3.4	4.7937e-05	0.099516	0.2061	0.28425	0.35879	0.41399
3.5	3.1958e-05	0.094824	0.20334	0.28322	0.3618	0.41705
3.6	3.1958e-05	0.09333	0.20103	0.28228	0.36597	0.42014
3.7	0	0.091138	0.19807	0.28081	0.37117	0.42547
3.8	0	0.089255	0.19638	0.2798	0.3716	0.43027
3.9	0	0.087144	0.195	0.27812	0.37611	0.43861
4	0	0.085602	0.19083	0.27597	0.37826	0.44669
4.1	0	0.085326	0.18867	0.27279	0.37914	0.45412
4.2	0	0.084368	0.1847	0.27104	0.37939	0.46376
4.3	0	0.082874	0.18149	0.26808	0.37954	0.47368
4.4	0	0.081851	0.1778	0.26429	0.38176	0.4889
4.5	0	0.081072	0.17274	0.25829	0.37584	0.50171
4.6	0	0.080666	0.16758	0.2514	0.3622	0.50586
4.7	0	0.08026	0.16453	0.24638	0.34984	0.4944
4.8	0	0.080114	0.16199	0.24309	0.33754	0.47773
4.9	0	0.080081	0.16101	0.2414	0.32947	0.44971
5	0	0.080049	0.16041	0.24058	0.32411	0.4245
5.1	0	0.080016	0.16014	0.24041	0.32166	0.40999
5.2	0	0.08	0.16003	0.24002	0.32078	0.4034
5.3	0	0.08	0.16	0.24001	0.32018	0.40133
5.4	0	0.08	0.16	0.24	0.32009	0.40021
5.5	0	0.08	0.16	0.24	0.32002	0.40002
5.6	0	0.08	0.16	0.24	0.32	0.4
5.7	0	0.08	0.16	0.24	0.32	0.4
5.8	0	0.08	0.16	0.24	0.32	0.4
5.9	0	0.08	0.16	0.24	0.32	0.4
6	0	0.08	0.16	0.24	0.32	0.4
6.1	0	0.08	0.16	0.24	0.32	0.4
6.2	0	0.08	0.16	0.24	0.32	0.4
6.3	0	0.08	0.16	0.24	0.32	0.4
6.4	0	0.08	0.16	0.24	0.32	0.4
6.5	0	0.08	0.16	0.24	0.32	0.4
6.6	0	0.08	0.16	0.24	0.32	0.4
6.7	0	0.08	0.16	0.24	0.32	0.4
6.8	0	0.08	0.16	0.24	0.32	0.4
6.9	0	0.08	0.16	0.24	0.32	0.4
7	0	0.08	0.16	0.24	0.32	0.4
7.1	0	0.08	0.16	0.24	0.32	0.4
7.2	0	0.08	0.16	0.24	0.32	0.4
7.3	0	0.08	0.16	0.24	0.32	0.4
7.4	0	0.08	0.16	0.24	0.32	0.4
7.5	0	0.08	0.16	0.24	0.32	0.4
7.6	0	0.08	0.16	0.24	0.32	0.4
7.7	0	0.08	0.16	0.24	0.32	0.4
7.8	0	0.08	0.16	0.24	0.32	0.4
7.9	0	0.08	0.16	0.24	0.32	0.4
8	0	0.08	0.16	0.24	0.32	0.4

## Sheet: Fig3E
log10(R)
1	0.0052985	0.081102	0.16024	0.24007	0.32011	0.4
1.1	0.0015594	0.080275	0.16002	0.24	0.32	0.4
1.2	0.0022151	0.080441	0.16006	0.24	0.32	0.4
1.3	0.0028176	0.080349	0.16009	0.24002	0.32	0.4
1.4	0.0035442	0.080551	0.16006	0.24	0.32002	0.40004
1.5	0.0052453	0.08101	0.1602	0.24007	0.32004	0.4
1.6	0.0065035	0.081359	0.16022	0.24007	0.32002	0.4
1.7	0.011944	0.082148	0.16072	0.24007	0.32002	0.40002
1.8	0.019936	0.083617	0.16079	0.24022	0.32015	0.4
1.9	0.033669	0.085857	0.16159	0.24031	0.3202	0.40004
2	0.060516	0.091126	0.16349	0.24065	0.32039	0.40009
2.1	0.10338	0.10381	0.1666	0.24135	0.32052	0.40009
2.2	0.16207	0.1236	0.17157	0.24272	0.3215	0.4002
2.3	0.21155	0.15356	0.18201	0.24576	0.32242	0.40043
2.4	0.20234	0.18659	0.19679	0.24929	0.32412	0.40074
2.5	0.11736	0.19763	0.2133	0.25536	0.32621	0.40087
2.6	0.038206	0.19623	0.22833	0.26406	0.3304	0.40134
2.7	0.0083288	0.18665	0.24335	0.27407	0.3367	0.40242
2.8	0.0021088	0.178	0.25479	0.29415	0.34716	0.4047
2.9	0.00081515	0.16012	0.26449	0.31131	0.36646	0.40888
3	0.00023037	0.14343	0.26722	0.33376	0.38837	0.41895
3.1	0.00014177	0.13052	0.27003	0.35961	0.42613	0.43683
3.2	3.5442e-05	0.11765	0.25625	0.37532	0.45571	0.46606
3.3	0.00010632	0.10379	0.23355	0.37229	0.47016	0.50441
3.4	5.3162e-05	0.094467	0.21155	0.34854	0.45817	0.53191
3.5	0	0.087803	0.19334	0.31877	0.42855	0.54424
3.6	0	0.084149	0.17998	0.28901	0.39517	0.53375
3.7	0	0.082478	0.16978	0.27111	0.36774	0.51
3.8	1.7721e-05	0.080918	0.16552	0.25719	0.3478	0.48702
3.9	0	0.080367	0.16269	0.24862	0.33421	0.461
4	0	0.080312	0.1609	0.24379	0.32661	0.43817
4.1	0	0.080055	0.16031	0.24163	0.32336	0.42564
4.2	0	0.08	0.16013	0.24052	0.32107	0.41363
4.3	0	0.08	0.16004	0.24015	0.32028	0.40584
4.4	0	0.080018	0.16002	0.24004	0.32017	0.40197
4.5	0	0.08	0.16	0.24004	0.32002	0.40051
4.6	0	0.08	0.16	0.24002	0.32002	0.40013
4.7	0	0.08	0.16	0.24	0.32	0.40004
4.8	0	0.08	0.16	0.24002	0.32	0.4
4.9	0	0.08	0.16	0.24	0.32	0.4
5	0	0.08	0.16	0.24	0.32	0.4
5.1	0	0.08	0.16	0.24	0.32	0.4
5.2	0	0.08	0.16	0.24	0.32	0.4
5.3	0	0.08	0.16	0.24	0.32	0.4
5.4	0	0.08	0.16	0.24	0.32	0.4
5.5	0	0.08	0.16	0.24	0.32	0.4
5.6	0	0.08	0.16	0.24	0.32	0.4
5.7	0	0.08	0.16	0.24	0.32	0.4
5.8	0	0.08	0.16	0.24	0.32	0.4
5.9	0	0.08	0.16	0.24	0.32	0.4
6	0	0.08	0.16	0.24	0.32	0.4
6.1	0	0.08	0.16	0.24	0.32	0.4
6.2	0	0.08	0.16	0.24	0.32	0.4
6.3	0	0.08	0.16	0.24	0.32	0.4
6.4	0	0.08	0.16	0.24	0.32	0.4
6.5	0	0.08	0.16	0.24	0.32	0.4
6.6	0	0.08	0.16	0.24	0.32	0.4
6.7	0	0.08	0.16	0.24	0.32	0.4
6.8	0	0.08	0.16	0.24	0.32	0.4
6.9	0	0.08	0.16	0.24	0.32	0.4
7	0	0.08	0.16	0.24	0.32	0.4
7.1	0	0.08	0.16	0.24	0.32	0.4
7.2	0	0.08	0.16	0.24	0.32	0.4
7.3	0	0.08	0.16	0.24	0.32	0.4
7.4	0	0.08	0.16	0.24	0.32	0.4
7.5	0	0.08	0.16	0.24	0.32	0.4
7.6	0	0.08	0.16	0.24	0.32	0.4
7.7	0	0.08	0.16	0.24	0.32	0.4
7.8	0	0.08	0.16	0.24	0.32	0.4
7.9	0	0.08	0.16	0.24	0.32	0.4
8	0	0.08	0.16	0.24	0.32	0.4

## Sheet: Fig3F
log10(R)
1	0.0010955	0.080318	0.16002	0.24005	0.32	0.40003
1.1	0.00029064	0.08	0.16	0.24005	0.32003	0.4
1.2	0.000313	0.08	0.16	0.24003	0.32003	0.4
1.3	0.000313	0.080023	0.16007	0.24	0.32003	0.4
1.4	0.00071542	0.080204	0.16002	0.24005	0.32	0.40003
1.5	0.0013414	0.080181	0.16005	0.24003	0.32	0.40003
1.6	0.0013861	0.080295	0.16002	0.24003	0.32	0.4
1.7	0.0029064	0.080544	0.16007	0.24005	0.32005	0.4
1.8	0.0047844	0.080907	0.16021	0.24013	0.32	0.40003
1.9	0.0099264	0.08186	0.1603	0.24023	0.32	0.40006
2	0.019361	0.083788	0.16076	0.24051	0.32008	0.40006
2.1	0.042232	0.087395	0.16097	0.24064	0.32018	0.40019
2.2	0.085045	0.095721	0.16252	0.24141	0.32026	0.40025
2.3	0.15701	0.11144	0.16498	0.24295	0.32042	0.40022
2.4	0.23282	0.13624	0.16908	0.2455	0.32062	0.40006
2.5	0.23685	0.15972	0.17489	0.24768	0.32083	0.40019
2.6	0.13877	0.16312	0.17929	0.24837	0.32088	0.40032
2.7	0.045206	0.15441	0.18299	0.25086	0.32094	0.4001
2.8	0.011648	0.14946	0.18556	0.25284	0.32153	0.40025
2.9	0.0040913	0.14216	0.18864	0.255	0.32125	0.40029
3	0.0016544	0.13488	0.19272	0.25731	0.32156	0.40019
3.1	0.0010284	0.13977	0.20018	0.26352	0.32294	0.40041
3.2	0.00067071	0.13896	0.20786	0.2695	0.32364	0.40054
3.3	0.000313	0.13787	0.21629	0.27526	0.32486	0.40051
3.4	0.00013414	0.13615	0.22352	0.28347	0.32814	0.40086
3.5	2.2357e-05	0.1322	0.23572	0.29251	0.33258	0.40124
3.6	6.7071e-05	0.12741	0.24598	0.30533	0.33984	0.40159
3.7	0	0.12052	0.25371	0.32099	0.35052	0.40283
3.8	0	0.11155	0.25371	0.33273	0.36854	0.40543
3.9	0	0.10289	0.24906	0.34564	0.39765	0.41284
4	0	0.095244	0.23428	0.35142	0.4433	0.42479
4.1	0	0.088824	0.21502	0.3458	0.48019	0.45402
4.2	0	0.084151	0.19448	0.3203	0.49662	0.51366
4.3	0	0.08127	0.17702	0.29082	0.47003	0.59266
4.4	0	0.080454	0.16713	0.26516	0.41676	0.63381
4.5	0	0.080068	0.16225	0.24971	0.3709	0.58055
4.6	0	0.080023	0.16051	0.24324	0.33833	0.50648
4.7	0	0.08	0.16009	0.24074	0.32533	0.44789
4.8	0	0.08	0.16002	0.24013	0.32099	0.415
4.9	0	0.08	0.16	0.24003	0.32016	0.40232
5	0	0.08	0.16	0.24	0.32	0.40022
5.1	0	0.08	0.16	0.24	0.32	0.40003
5.2	0	0.08	0.16	0.24	0.32	0.4
5.3	0	0.08	0.16	0.24	0.32	0.4
5.4	0	0.08	0.16	0.24	0.32	0.4
5.5	0	0.08	0.16	0.24	0.32	0.4
5.6	0	0.08	0.16	0.24	0.32	0.4
5.7	0	0.08	0.16	0.24	0.32	0.4
5.8	0	0.08	0.16	0.24	0.32	0.4
5.9	0	0.08	0.16	0.24	0.32	0.4
6	0	0.08	0.16	0.24	0.32	0.4
6.1	0	0.08	0.16	0.24	0.32	0.4
6.2	0	0.08	0.16	0.24	0.32	0.4
6.3	0	0.08	0.16	0.24	0.32	0.4
6.4	0	0.08	0.16	0.24	0.32	0.4
6.5	0	0.08	0.16	0.24	0.32	0.4
6.6	0	0.08	0.16	0.24	0.32	0.4
6.7	0	0.08	0.16	0.24	0.32	0.4
6.8	0	0.08	0.16	0.24	0.32	0.4
6.9	0	0.08	0.16	0.24	0.32	0.4
7	0	0.08	0.16	0.24	0.32	0.4
7.1	0	0.08	0.16	0.24	0.32	0.4
7.2	0	0.08	0.16	0.24	0.32	0.4
7.3	0	0.08	0.16	0.24	0.32	0.4
7.4	0	0.08	0.16	0.24	0.32	0.4
7.5	0	0.08	0.16	0.24	0.32	0.4
7.6	0	0.08	0.16	0.24	0.32	0.4
7.7	0	0.08	0.16	0.24	0.32	0.4
7.8	0	0.08	0.16	0.24	0.32	0.4
7.9	0	0.08	0.16	0.24	0.32	0.4
8	0	0.08	0.16	0.24	0.32	0.4

## Sheet: Fig3G
log10(GP)
1	0	0.1	0.2	0.3	0.4	0.5	0.6
1.1	0	0.1	0.2	0.3	0.4	0.5	0.6
1.2	0	0.1	0.2	0.3	0.4	0.5	0.6
1.3	0	0.1	0.2	0.3	0.4	0.5	0.6
1.4	0	0.1	0.2	0.3	0.4	0.5	0.6
1.5	0	0.1	0.2	0.3	0.4	0.5	0.6
1.6	0	0.1	0.2	0.3	0.4	0.5	0.6
1.7	0	0.1	0.2	0.3	0.4	0.5	0.6
1.8	0	0.1	0.2	0.3	0.4	0.5	0.6
1.9	0	0.1	0.2	0.3	0.4	0.5	0.6
2	0	0.1	0.2	0.3	0.4	0.5	0.6
2.1	0	0.1	0.2	0.3	0.4	0.5	0.6
2.2	0	0.1	0.2	0.3	0.4	0.5	0.6
2.3	0	0.1	0.2	0.3	0.4	0.5	0.6
2.4	0	0.1	0.2	0.3	0.4	0.5	0.6
2.5	0	0.1	0.2	0.3	0.4	0.5	0.6
2.6	0	0.1	0.2	0.3	0.4	0.5	0.6
2.7	0	0.1	0.2	0.3	0.4	0.5	0.6
2.8	0	0.1	0.2	0.3	0.4	0.5	0.6
2.9	0	0.10007	0.2	0.3	0.4	0.5	0.6
3	0.00037075	0.10007	0.20014	0.3	0.4	0.5	0.6
3.1	0.00092687	0.10007	0.2	0.3	0.4	0.50021	0.6
3.2	0.0080638	0.102	0.20098	0.30016	0.40042	0.50021	0.60008
3.3	0.037724	0.10934	0.20294	0.30134	0.40064	0.50014	0.60008
3.4	0.1331	0.13324	0.20978	0.30189	0.40092	0.50056	0.60032
3.5	0.25721	0.17375	0.22292	0.30495	0.40148	0.50126	0.60008
3.6	0.28353	0.2206	0.24025	0.31124	0.40614	0.50147	0.60048
3.7	0.17573	0.24364	0.25402	0.32137	0.41045	0.50246	0.60024
3.8	0.070071	0.24892	0.2703	0.32608	0.41066	0.50372	0.60024
3.9	0.02484	0.23095	0.28183	0.33481	0.41772	0.5059	0.60056
4	0.0060247	0.20641	0.28777	0.34376	0.42167	0.50829	0.60096
4.1	0.0021318	0.17774	0.29539	0.35688	0.43247	0.5125	0.60233
4.2	0.00018537	0.15506	0.30112	0.36458	0.44383	0.52184	0.60305
4.3	9.2687e-05	0.13873	0.29713	0.38069	0.46092	0.53013	0.60546
4.4	0	0.12525	0.28735	0.39247	0.48012	0.54368	0.60987
4.5	0	0.11619	0.27561	0.40559	0.49995	0.56088	0.6191
4.6	0	0.10984	0.26164	0.40709	0.51809	0.58469	0.63379
4.7	0	0.10456	0.24375	0.39899	0.52473	0.61433	0.66027
4.8	0	0.10257	0.23012	0.39514	0.5267	0.63265	0.70169
4.9	0	0.10043	0.21999	0.36992	0.49953	0.64782	0.74647
5	0	0.10043	0.20908	0.34683	0.4744	0.63581	0.77986
5.1	0	0.10007	0.20454	0.32153	0.44115	0.6019	0.77327
5.2	0	0.10007	0.20224	0.31045	0.41941	0.55323	0.73387
5.3	0	0.1	0.20077	0.30306	0.40656	0.52556	0.67953
5.4	0	0.1	0.20028	0.3011	0.4012	0.50794	0.63427
5.5	0	0.1	0.20007	0.3	0.40071	0.50232	0.61156
5.6	0	0.1	0.2	0.30008	0.40007	0.50028	0.60217
5.7	0	0.1	0.2	0.3	0.40007	0.50014	0.60032
5.8	0	0.1	0.2	0.3	0.4	0.50007	0.6
5.9	0	0.1	0.2	0.3	0.4	0.5	0.60008
6	0	0.1	0.2	0.3	0.4	0.5	0.6
6.1	0	0.1	0.2	0.3	0.4	0.5	0.6
6.2	0	0.1	0.2	0.3	0.4	0.5	0.6
6.3	0	0.1	0.2	0.3	0.4	0.5	0.6
6.4	0	0.1	0.2	0.3	0.4	0.5	0.6
6.5	0	0.1	0.2	0.3	0.4	0.5	0.6
6.6	0	0.1	0.2	0.3	0.4	0.5	0.6
6.7	0	0.1	0.2	0.3	0.4	0.5	0.6
6.8	0	0.1	0.2	0.3	0.4	0.5	0.6
6.9	0	0.1	0.2	0.3	0.4	0.5	0.6
7	0	0.1	0.2	0.3	0.4	0.5	0.6
7.1	0	0.1	0.2	0.3	0.4	0.5	0.6
7.2	0	0.1	0.2	0.3	0.4	0.5	0.6
7.3	0	0.1	0.2	0.3	0.4	0.5	0.6
7.4	0	0.1	0.2	0.3	0.4	0.5	0.6
7.5	0	0.1	0.2	0.3	0.4	0.5	0.6
7.6	0	0.1	0.2	0.3	0.4	0.5	0.6
7.7	0	0.1	0.2	0.3	0.4	0.5	0.6
7.8	0	0.1	0.2	0.3	0.4	0.5	0.6
7.9	0	0.1	0.2	0.3	0.4	0.5	0.6
8	0	0.1	0.2	0.3	0.4	0.5	0.6

## Sheet: Fig3H
log10(GP)
1	0	0.1	0.2	0.3	0.4	0.5	0.6
1.1	0	0.1	0.2	0.3	0.4	0.5	0.6
1.2	0	0.1	0.2	0.3	0.4	0.5	0.6
1.3	0	0.1	0.2	0.3	0.4	0.5	0.6
1.4	0	0.1	0.2	0.3	0.4	0.5	0.6
1.5	0	0.1	0.2	0.3	0.4	0.5	0.6
1.6	0	0.1	0.2	0.3	0.4	0.5	0.6
1.7	0	0.1	0.2	0.3	0.4	0.5	0.6
1.8	0	0.1	0.2	0.3	0.4	0.5	0.6
1.9	0	0.1	0.2	0.3	0.4	0.5	0.6
2	0	0.1	0.2	0.3	0.4	0.5	0.6
2.1	0	0.1	0.2	0.3	0.4	0.5	0.6
2.2	0	0.1	0.2	0.3	0.4	0.5	0.6
2.3	0	0.1	0.2	0.3	0.4	0.5	0.6
2.4	0	0.1	0.2	0.3	0.4	0.5	0.6
2.5	0	0.1	0.2	0.3	0.4	0.5	0.6
2.6	0	0.1	0.2	0.3	0.4	0.5	0.6
2.7	0.00018389	0.1	0.2	0.3	0.4	0.5	0.6
2.8	0	0.1	0.20009	0.3	0.4	0.5	0.6
2.9	0	0.1	0.2	0.3	0.4	0.5	0.60012
3	0	0.10009	0.2	0.3	0.4	0.5001	0.6
3.1	0	0.1	0.20009	0.30028	0.40012	0.5	0.60012
3.2	0.0012872	0.10047	0.20026	0.30037	0.4007	0.5003	0.60012
3.3	0.013608	0.1017	0.20026	0.3	0.40023	0.5004	0.60025
3.4	0.043582	0.10739	0.20165	0.30046	0.40058	0.5003	0.60025
3.5	0.10537	0.11553	0.20251	0.30074	0.4007	0.5004	0.60025
3.6	0.18739	0.13078	0.20468	0.30093	0.40082	0.5002	0.6005
3.7	0.21515	0.14944	0.20935	0.30111	0.40105	0.5007	0.6005
3.8	0.18168	0.15682	0.21282	0.30195	0.40128	0.5004	0.60037
3.9	0.12302	0.17273	0.21775	0.30315	0.40257	0.5011	0.60037
4	0.065649	0.17823	0.22373	0.30436	0.40222	0.501	0.60025
4.1	0.036594	0.18694	0.22962	0.30574	0.40479	0.5012	0.60087
4.2	0.016182	0.19508	0.24131	0.31112	0.40759	0.5025	0.60112
4.3	0.0066201	0.1949	0.24763	0.31334	0.40992	0.5031	0.60236
4.4	0.0023906	0.19442	0.25637	0.31955	0.41541	0.5041	0.60285
4.5	0.00073556	0.18685	0.26988	0.32826	0.42206	0.5064	0.60545
4.6	0.00036778	0.17766	0.28703	0.34179	0.4377	0.5136	0.61054
4.7	0.00018389	0.16364	0.29915	0.36347	0.45615	0.52259	0.61835
4.8	0	0.14186	0.31413	0.39201	0.48136	0.53929	0.63335
4.9	0	0.1287	0.31993	0.4237	0.52081	0.56508	0.6652
5	0	0.11004	0.30859	0.45632	0.54439	0.60747	0.70624
5.1	0	0.10426	0.2782	0.46179	0.56645	0.65565	0.76103
5.2	0	0.1017	0.24754	0.42889	0.53891	0.69424	0.79078
5.3	0	0.10057	0.21879	0.37923	0.50074	0.67685	0.78012
5.4	0	0.10019	0.2058	0.34003	0.45148	0.61397	0.71479
5.5	0	0.1	0.20234	0.31547	0.42229	0.55698	0.66223
5.6	0	0.1	0.20043	0.30482	0.407	0.52169	0.62789
5.7	0	0.1	0.2	0.30056	0.40187	0.508	0.61066
5.8	0	0.1	0.20009	0.30056	0.40058	0.5017	0.60174
5.9	0	0.1	0.2	0.3	0.40012	0.5004	0.60099
6	0	0.1	0.2	0.3	0.40012	0.5003	0.60012
6.1	0	0.1	0.2	0.3	0.4	0.5	0.60012
6.2	0	0.1	0.2	0.3	0.4	0.5	0.60012
6.3	0	0.1	0.2	0.3	0.4	0.5	0.6
6.4	0	0.1	0.2	0.3	0.4	0.5	0.6
6.5	0	0.1	0.2	0.3	0.4	0.5	0.6
6.6	0	0.1	0.2	0.3	0.4	0.5	0.6
6.7	0	0.1	0.2	0.3	0.4	0.5	0.6
6.8	0	0.1	0.2	0.3	0.4	0.5	0.6
6.9	0	0.1	0.2	0.3	0.4	0.5	0.6
7	0	0.1	0.2	0.3	0.4	0.5	0.6
7.1	0	0.1	0.2	0.3	0.4	0.5	0.6
7.2	0	0.1	0.2	0.3	0.4	0.5	0.6
7.3	0	0.1	0.2	0.3	0.4	0.5	0.6
7.4	0	0.1	0.2	0.3	0.4	0.5	0.6
7.5	0	0.1	0.2	0.3	0.4	0.5	0.6
7.6	0	0.1	0.2	0.3	0.4	0.5	0.6
7.7	0	0.1	0.2	0.3	0.4	0.5	0.6
7.8	0	0.1	0.2	0.3	0.4	0.5	0.6
7.9	0	0.1	0.2	0.3	0.4	0.5	0.6
8	0	0.1	0.2	0.3	0.4	0.5	0.6

## Sheet: Fig3J
distance from SS	dark	AM25-low	AM-25 high
-1000	229.52	183.01	628.15
-999	229.52	183.01	628.15
-998	229.52	183.01	628.15
-997	229.52	183.01	628.15
-996	229.52	184.76	628.15
-995	229.52	183.01	628.15
-994	229.52	183.01	628.15
-993	229.52	183.01	628.15
-992	229.52	183.01	628.15
-991	229.52	183.01	628.15
-990	229.52	184.76	639.37
-989	235.12	186.5	643.11
-988	235.12	186.5	643.11
-987	235.12	186.5	643.11
-986	235.12	186.5	643.11
-985	235.12	186.5	643.11
-984	235.12	184.76	631.89
-983	235.12	184.76	631.89
-982	235.12	184.76	631.89
-981	235.12	184.76	631.89
-980	235.12	184.76	631.89
-979	237.92	183.02	631.89
-978	237.92	181.27	635.63
-977	240.71	181.27	639.37
-976	240.71	181.27	639.37
-975	240.71	181.27	639.37
-974	240.71	181.27	639.37
-973	240.71	181.27	639.37
-972	240.71	181.27	639.37
-971	240.71	181.27	639.37
-970	240.71	181.27	631.89
-969	240.71	181.27	631.89
-968	240.71	181.27	631.89
-967	240.71	181.27	631.89
-966	240.71	181.27	631.89
-965	243.51	181.27	631.89
-964	251.91	181.27	631.89
-963	251.91	181.27	631.89
-962	251.91	181.27	631.89
-961	251.91	181.27	631.89
-960	251.91	181.27	631.89
-959	251.91	176.04	635.63
-958	251.91	176.04	635.63
-957	251.91	176.04	635.63
-956	251.91	176.04	635.63
-955	251.91	176.04	635.63
-954	246.31	172.56	635.63
-953	249.11	169.07	628.15
-952	249.11	167.33	639.37
-951	249.11	167.33	639.37
-950	249.11	167.33	639.37
-949	249.11	167.33	639.37
-948	249.11	167.33	639.37
-947	249.11	167.33	639.37
-946	249.11	165.59	635.63
-945	249.11	165.59	635.63
-944	249.11	165.59	635.63
-943	249.11	165.59	635.63
-942	249.11	165.59	635.63
-941	249.11	165.59	635.63
-940	246.31	169.07	639.37
-939	246.31	169.07	646.85
-938	246.31	169.07	646.85
-937	246.31	169.07	646.85
-936	246.31	169.07	646.85
-935	246.31	169.07	646.85
-934	229.52	165.59	616.94
-933	229.52	165.59	616.94
-932	229.52	165.59	616.94
-931	229.52	165.59	616.94
-930	229.52	165.59	616.94
-929	226.72	163.84	616.94
-928	226.72	165.59	613.2
-927	226.72	163.84	624.41
-926	226.72	163.84	624.41
-925	226.72	163.84	624.41
-924	226.72	163.84	624.41
-923	226.72	163.84	624.41
-922	226.72	163.84	624.41
-921	223.92	163.84	620.67
-920	223.92	163.84	624.41
-919	223.92	163.84	624.41
-918	223.92	163.84	624.41
-917	223.92	163.84	624.41
-916	223.92	163.84	624.41
-915	226.72	162.1	624.41
-914	226.72	162.1	639.37
-913	226.72	162.1	639.37
-912	226.72	162.1	639.37
-911	226.72	162.1	639.37
-910	226.72	162.1	639.37
-909	221.12	151.64	609.46
-908	221.12	151.64	609.46
-907	221.12	151.64	609.46
-906	221.12	151.64	609.46
-905	221.12	151.64	609.46
-904	218.32	153.38	609.46
-903	218.32	153.38	605.72
-902	218.32	153.38	605.72
-901	218.32	153.38	605.72
-900	218.32	153.38	605.72
-899	218.32	153.38	605.72
-898	218.32	153.38	605.72
-897	218.32	153.38	605.72
-896	218.32	151.64	605.72
-895	215.52	151.64	605.72
-894	215.52	151.64	605.72
-893	215.52	151.64	605.72
-892	215.52	151.64	605.72
-891	215.52	151.64	605.72
-890	212.72	149.9	605.72
-889	209.93	149.9	605.72
-888	209.93	149.9	605.72
-887	209.93	149.9	605.72
-886	209.93	149.9	605.72
-885	209.93	149.9	605.72
-884	198.73	137.7	590.76
-883	198.73	137.7	590.76
-882	198.73	137.7	590.76
-881	198.73	137.7	590.76
-880	198.73	137.7	590.76
-879	193.13	137.7	572.07
-878	193.13	141.18	572.07
-877	193.13	137.7	568.33
-876	193.13	137.7	568.33
-875	193.13	137.7	568.33
-874	193.13	137.7	568.33
-873	193.13	137.7	568.33
-872	193.13	137.7	568.33
-871	193.13	137.7	568.33
-870	193.13	134.21	568.33
-869	193.13	134.21	568.33
-868	193.13	134.21	568.33
-867	193.13	134.21	568.33
-866	193.13	134.21	568.33
-865	193.13	135.95	560.85
-864	193.13	137.7	560.85
-863	193.13	137.7	560.85
-862	193.13	137.7	560.85
-861	193.13	137.7	560.85
-860	193.13	137.7	560.85
-859	176.34	135.95	538.42
-858	176.34	135.95	538.42
-857	176.34	135.95	538.42
-856	176.34	135.95	538.42
-855	176.34	135.95	538.42
-854	170.74	132.47	534.68
-853	165.14	132.47	527.2
-852	167.94	132.47	534.68
-851	167.94	132.47	534.68
-850	167.94	132.47	534.68
-849	167.94	132.47	534.68
-848	167.94	132.47	534.68
-847	167.94	132.47	534.68
-846	167.94	132.47	530.94
-845	167.94	132.47	527.2
-844	167.94	132.47	527.2
-843	167.94	132.47	527.2
-842	167.94	132.47	527.2
-841	167.94	132.47	527.2
-840	170.74	132.47	527.2
-839	167.94	134.21	527.2
-838	167.94	134.21	527.2
-837	167.94	134.21	527.2
-836	167.94	134.21	527.2
-835	167.94	134.21	527.2
-834	156.74	125.5	493.55
-833	156.74	125.5	493.55
-832	156.74	125.5	493.55
-831	156.74	125.5	493.55
-830	156.74	125.5	493.55
-829	156.74	120.27	471.11
-828	156.74	113.3	474.85
-827	153.94	106.32	471.11
-826	153.94	106.32	471.11
-825	153.94	106.32	471.11
-824	153.94	106.32	471.11
-823	153.94	106.32	471.11
-822	153.94	106.32	471.11
-821	153.94	106.32	471.11
-820	153.94	104.58	471.11
-819	153.94	104.58	471.11
-818	153.94	104.58	471.11
-817	153.94	104.58	471.11
-816	153.94	104.58	471.11
-815	153.94	102.84	467.37
-814	153.94	101.09	463.64
-813	153.94	101.09	463.64
-812	153.94	101.09	463.64
-811	153.94	101.09	463.64
-810	153.94	101.09	463.64
-809	137.15	92.379	452.42
-808	137.15	92.379	452.42
-807	137.15	92.379	452.42
-806	137.15	92.379	452.42
-805	137.15	92.379	452.42
-804	137.15	92.379	452.42
-803	134.35	85.407	444.94
-802	134.35	85.407	444.94
-801	134.35	85.407	444.94
-800	134.35	85.407	444.94
-799	134.35	85.407	444.94
-798	134.35	85.407	444.94
-797	134.35	85.407	444.94
-796	134.35	85.407	444.94
-795	134.35	85.407	444.94
-794	134.35	85.407	444.94
-793	134.35	85.407	444.94
-792	134.35	85.407	444.94
-791	134.35	85.407	444.94
-790	134.35	85.407	444.94
-789	131.55	83.664	441.2
-788	131.55	83.664	441.2
-787	131.55	83.664	441.2
-786	131.55	83.664	441.2
-785	131.55	83.664	441.2
-784	123.16	76.692	437.46
-783	123.16	76.692	437.46
-782	123.16	76.692	437.46
-781	123.16	76.692	437.46
-780	123.16	76.692	437.46
-779	123.16	71.463	433.72
-778	120.36	67.977	429.99
-777	120.36	69.72	437.46
-776	120.36	69.72	437.46
-775	120.36	69.72	437.46
-774	120.36	69.72	437.46
-773	120.36	69.72	437.46
-772	120.36	69.72	437.46
-771	120.36	66.234	444.94
-770	120.36	64.491	444.94
-769	120.36	64.491	444.94
-768	120.36	64.491	444.94
-767	120.36	64.491	444.94
-766	120.36	64.491	444.94
-765	117.56	66.234	441.2
-764	117.56	66.234	441.2
-763	117.56	66.234	441.2
-762	117.56	66.234	441.2
-761	117.56	66.234	441.2
-760	117.56	66.234	441.2
-759	89.568	61.005	407.55
-758	89.568	61.005	407.55
-757	89.568	61.005	407.55
-756	89.568	61.005	407.55
-755	89.568	61.005	407.55
-754	89.568	59.262	388.86
-753	86.769	50.547	388.86
-752	86.769	47.061	388.86
-751	86.769	47.061	388.86
-750	86.769	47.061	388.86
-749	86.769	47.061	388.86
-748	86.769	47.061	388.86
-747	86.769	47.061	388.86
-746	86.769	45.318	388.86
-745	86.769	47.061	392.6
-744	86.769	47.061	392.6
-743	86.769	47.061	392.6
-742	86.769	47.061	392.6
-741	86.769	47.061	392.6
-740	78.372	45.318	392.6
-739	78.372	43.575	385.12
-738	78.372	43.575	385.12
-737	78.372	43.575	385.12
-736	78.372	43.575	385.12
-735	78.372	43.575	385.12
-734	64.377	45.318	373.9
-733	64.377	45.318	373.9
-732	64.377	45.318	373.9
-731	64.377	45.318	373.9
-730	64.377	45.318	373.9
-729	64.377	47.061	366.42
-728	55.98	45.318	362.68
-727	55.98	45.318	355.21
-726	55.98	45.318	355.21
-725	55.98	45.318	355.21
-724	55.98	45.318	355.21
-723	55.98	45.318	355.21
-722	55.98	45.318	355.21
-721	55.98	45.318	355.21
-720	55.98	45.318	355.21
-719	55.98	45.318	355.21
-718	55.98	45.318	355.21
-717	55.98	45.318	355.21
-716	55.98	45.318	355.21
-715	53.181	45.318	347.73
-714	50.382	45.318	340.25
-713	50.382	45.318	340.25
-712	50.382	45.318	340.25
-711	50.382	45.318	340.25
-710	50.382	45.318	340.25
-709	47.583	47.061	329.03
-708	47.583	47.061	329.03
-707	47.583	47.061	329.03
-706	47.583	47.061	329.03
-705	47.583	47.061	329.03
-704	47.583	43.575	325.29
-703	50.382	40.089	310.34
-702	50.382	40.089	295.38
-701	50.382	40.089	295.38
-700	50.382	40.089	295.38
-699	50.382	40.089	295.38
-698	50.382	40.089	295.38
-697	50.382	40.089	295.38
-696	50.382	40.089	295.38
-695	50.382	40.089	295.38
-694	50.382	40.089	295.38
-693	50.382	40.089	295.38
-692	50.382	40.089	295.38
-691	50.382	40.089	295.38
-690	53.181	38.346	287.9
-689	47.583	38.346	280.43
-688	47.583	38.346	280.43
-687	47.583	38.346	280.43
-686	47.583	38.346	280.43
-685	47.583	38.346	280.43
-684	44.784	38.346	269.21
-683	44.784	38.346	269.21
-682	44.784	38.346	269.21
-681	44.784	38.346	269.21
-680	44.784	38.346	269.21
-679	50.382	36.603	272.95
-678	50.382	36.603	257.99
-677	50.382	36.603	265.47
-676	50.382	36.603	265.47
-675	50.382	36.603	265.47
-674	50.382	36.603	265.47
-673	50.382	36.603	265.47
-672	50.382	36.603	265.47
-671	53.181	38.346	257.99
-670	53.181	38.346	257.99
-669	53.181	38.346	257.99
-668	53.181	38.346	257.99
-667	53.181	38.346	257.99
-666	53.181	38.346	257.99
-665	55.98	38.346	261.73
-664	53.181	38.346	250.51
-663	53.181	38.346	250.51
-662	53.181	38.346	250.51
-661	53.181	38.346	250.51
-660	53.181	38.346	250.51
-659	50.382	34.86	239.3
-658	50.382	34.86	239.3
-657	50.382	34.86	239.3
-656	50.382	34.86	239.3
-655	50.382	34.86	239.3
-654	50.382	34.86	243.04
-653	53.181	34.86	246.77
-652	53.181	34.86	235.56
-651	53.181	34.86	235.56
-650	53.181	34.86	235.56
-649	53.181	34.86	235.56
-648	53.181	34.86	235.56
-647	53.181	34.86	235.56
-646	53.181	34.86	228.08
-645	53.181	34.86	228.08
-644	53.181	34.86	228.08
-643	53.181	34.86	228.08
-642	53.181	34.86	228.08
-641	53.181	34.86	228.08
-640	53.181	33.117	228.08
-639	53.181	31.374	228.08
-638	53.181	31.374	228.08
-637	53.181	31.374	228.08
-636	53.181	31.374	228.08
-635	53.181	31.374	228.08
-634	50.382	31.374	216.86
-633	50.382	31.374	216.86
-632	50.382	31.374	216.86
-631	50.382	31.374	216.86
-630	50.382	31.374	216.86
-629	47.583	26.145	216.86
-628	47.583	26.145	209.38
-627	47.583	24.402	201.91
-626	47.583	24.402	201.91
-625	47.583	24.402	201.91
-624	47.583	24.402	201.91
-623	47.583	24.402	201.91
-622	47.583	24.402	201.91
-621	47.583	24.402	198.17
-620	50.382	24.402	209.38
-619	50.382	24.402	209.38
-618	50.382	24.402	209.38
-617	50.382	24.402	209.38
-616	50.382	24.402	209.38
-615	50.382	24.402	213.12
-614	50.382	24.402	216.86
-613	50.382	24.402	216.86
-612	50.382	24.402	216.86
-611	50.382	24.402	216.86
-610	50.382	24.402	216.86
-609	44.784	24.402	213.12
-608	44.784	24.402	213.12
-607	44.784	24.402	213.12
-606	44.784	24.402	213.12
-605	44.784	24.402	213.12
-604	44.784	22.659	205.65
-603	44.784	20.916	205.65
-602	47.583	20.916	198.17
-601	47.583	20.916	198.17
-600	47.583	20.916	198.17
-599	47.583	20.916	198.17
-598	47.583	20.916	198.17
-597	47.583	20.916	198.17
-596	50.382	20.916	198.17
-595	50.382	20.916	198.17
-594	50.382	20.916	198.17
-593	50.382	20.916	198.17
-592	50.382	20.916	198.17
-591	50.382	20.916	198.17
-590	50.382	20.916	194.43
-589	50.382	19.173	194.43
-588	50.382	19.173	194.43
-587	50.382	19.173	194.43
-586	50.382	19.173	194.43
-585	50.382	19.173	194.43
-584	50.382	19.173	186.95
-583	50.382	19.173	186.95
-582	50.382	19.173	186.95
-581	50.382	19.173	186.95
-580	50.382	19.173	186.95
-579	47.583	19.173	186.95
-578	47.583	19.173	186.95
-577	47.583	20.916	183.21
-576	47.583	20.916	183.21
-575	47.583	20.916	183.21
-574	47.583	20.916	183.21
-573	47.583	20.916	183.21
-572	47.583	20.916	183.21
-571	47.583	20.916	186.95
-570	47.583	20.916	186.95
-569	47.583	20.916	186.95
-568	47.583	20.916	186.95
-567	47.583	20.916	186.95
-566	47.583	20.916	186.95
-565	47.583	19.173	186.95
-564	47.583	19.173	190.69
-563	47.583	19.173	190.69
-562	47.583	19.173	190.69
-561	47.583	19.173	190.69
-560	47.583	19.173	190.69
-559	47.583	19.173	179.47
-558	47.583	19.173	179.47
-557	47.583	19.173	179.47
-556	47.583	19.173	179.47
-555	47.583	19.173	179.47
-554	47.583	19.173	183.21
-553	47.583	20.916	179.47
-552	47.583	20.916	179.47
-551	47.583	20.916	179.47
-550	47.583	20.916	179.47
-549	47.583	20.916	179.47
-548	47.583	20.916	179.47
-547	47.583	20.916	179.47
-546	47.583	20.916	183.21
-545	47.583	20.916	183.21
-544	47.583	20.916	183.21
-543	47.583	20.916	183.21
-542	47.583	20.916	183.21
-541	47.583	20.916	183.21
-540	44.784	20.916	183.21
-539	44.784	20.916	183.21
-538	44.784	20.916	183.21
-537	44.784	20.916	183.21
-536	44.784	20.916	183.21
-535	44.784	20.916	183.21
-534	44.784	20.916	186.95
-533	44.784	20.916	186.95
-532	44.784	20.916	186.95
-531	44.784	20.916	186.95
-530	44.784	20.916	186.95
-529	44.784	22.659	194.43
-528	44.784	24.402	198.17
-527	41.985	24.402	198.17
-526	41.985	24.402	198.17
-525	41.985	24.402	198.17
-524	41.985	24.402	198.17
-523	41.985	24.402	198.17
-522	41.985	24.402	198.17
-521	41.985	24.402	198.17
-520	44.784	24.402	198.17
-519	44.784	24.402	198.17
-518	44.784	24.402	198.17
-517	44.784	24.402	198.17
-516	44.784	24.402	198.17
-515	41.985	24.402	198.17
-514	41.985	24.402	198.17
-513	41.985	24.402	198.17
-512	41.985	24.402	198.17
-511	41.985	24.402	198.17
-510	41.985	24.402	198.17
-509	41.985	24.402	194.43
-508	41.985	24.402	194.43
-507	41.985	24.402	194.43
-506	41.985	24.402	194.43
-505	41.985	24.402	194.43
-504	41.985	26.145	201.91
-503	41.985	26.145	205.65
-502	41.985	24.402	205.65
-501	41.985	24.402	205.65
-500	41.985	24.402	205.65
-499	41.985	24.402	205.65
-498	41.985	24.402	205.65
-497	41.985	24.402	205.65
-496	41.985	24.402	198.17
-495	41.985	24.402	198.17
-494	41.985	24.402	198.17
-493	41.985	24.402	198.17
-492	41.985	24.402	198.17
-491	41.985	24.402	198.17
-490	41.985	24.402	194.43
-489	41.985	24.402	194.43
-488	41.985	24.402	194.43
-487	41.985	24.402	194.43
-486	41.985	24.402	194.43
-485	41.985	24.402	194.43
-484	41.985	24.402	183.21
-483	41.985	24.402	183.21
-482	41.985	24.402	183.21
-481	41.985	24.402	183.21
-480	41.985	24.402	183.21
-479	39.186	22.659	183.21
-478	39.186	22.659	183.21
-477	39.186	22.659	179.47
-476	39.186	22.659	179.47
-475	39.186	22.659	179.47
-474	39.186	22.659	179.47
-473	39.186	22.659	179.47
-472	39.186	22.659	179.47
-471	39.186	22.659	175.73
-470	39.186	20.916	171.99
-469	39.186	20.916	171.99
-468	39.186	20.916	171.99
-467	39.186	20.916	171.99
-466	39.186	20.916	171.99
-465	33.588	20.916	171.99
-464	33.588	20.916	171.99
-463	33.588	20.916	171.99
-462	33.588	20.916	171.99
-461	33.588	20.916	171.99
-460	33.588	20.916	171.99
-459	30.789	19.173	171.99
-458	30.789	19.173	171.99
-457	30.789	19.173	171.99
-456	30.789	19.173	171.99
-455	30.789	19.173	171.99
-454	30.789	19.173	164.52
-453	30.789	19.173	164.52
-452	30.789	19.173	164.52
-451	30.789	19.173	164.52
-450	30.789	19.173	164.52
-449	30.789	19.173	164.52
-448	30.789	19.173	164.52
-447	30.789	19.173	164.52
-446	30.789	19.173	160.78
-445	30.789	19.173	157.04
-444	30.789	19.173	157.04
-443	30.789	19.173	157.04
-442	30.789	19.173	157.04
-441	30.789	19.173	157.04
-440	30.789	19.173	153.3
-439	30.789	19.173	153.3
-438	30.789	19.173	153.3
-437	30.789	19.173	153.3
-436	30.789	19.173	153.3
-435	30.789	19.173	153.3
-434	33.588	19.173	153.3
-433	33.588	19.173	153.3
-432	33.588	19.173	153.3
-431	33.588	19.173	153.3
-430	33.588	19.173	153.3
-429	30.789	19.173	149.56
-428	30.789	19.173	149.56
-427	30.789	19.173	145.82
-426	30.789	19.173	145.82
-425	30.789	19.173	145.82
-424	30.789	19.173	145.82
-423	30.789	19.173	145.82
-422	30.789	19.173	145.82
-421	27.99	20.916	153.3
-420	27.99	20.916	153.3
-419	27.99	20.916	153.3
-418	27.99	20.916	153.3
-417	27.99	20.916	153.3
-416	27.99	20.916	153.3
-415	30.789	24.402	157.04
-414	33.588	24.402	153.3
-413	33.588	24.402	153.3
-412	33.588	24.402	153.3
-411	33.588	24.402	153.3
-410	33.588	24.402	153.3
-409	33.588	24.402	145.82
-408	33.588	24.402	145.82
-407	33.588	24.402	145.82
-406	33.588	24.402	145.82
-405	33.588	24.402	145.82
-404	30.789	24.402	138.34
-403	30.789	24.402	138.34
-402	30.789	26.145	142.08
-401	30.789	26.145	142.08
-400	30.789	26.145	142.08
-399	30.789	26.145	142.08
-398	30.789	26.145	142.08
-397	30.789	26.145	142.08
-396	33.588	31.374	145.82
-395	33.588	31.374	145.82
-394	33.588	31.374	145.82
-393	33.588	31.374	145.82
-392	33.588	31.374	145.82
-391	33.588	31.374	145.82
-390	33.588	33.117	145.82
-389	36.387	33.117	145.82
-388	36.387	33.117	145.82
-387	36.387	33.117	145.82
-386	36.387	33.117	145.82
-385	36.387	33.117	145.82
-384	36.387	38.346	149.56
-383	36.387	38.346	149.56
-382	36.387	38.346	149.56
-381	36.387	38.346	149.56
-380	36.387	38.346	149.56
-379	36.387	38.346	164.52
-378	33.588	38.346	186.95
-377	33.588	38.346	186.95
-376	33.588	38.346	186.95
-375	33.588	38.346	186.95
-374	33.588	38.346	186.95
-373	33.588	38.346	186.95
-372	33.588	38.346	186.95
-371	36.387	36.603	194.43
-370	39.186	36.603	205.65
-369	39.186	36.603	205.65
-368	39.186	36.603	205.65
-367	39.186	36.603	205.65
-366	39.186	36.603	205.65
-365	44.784	38.346	213.12
-364	44.784	40.089	228.08
-363	44.784	40.089	228.08
-362	44.784	40.089	228.08
-361	44.784	40.089	228.08
-360	44.784	40.089	228.08
-359	47.583	40.089	239.3
-358	47.583	40.089	239.3
-357	47.583	40.089	239.3
-356	47.583	40.089	239.3
-355	47.583	40.089	239.3
-354	53.181	41.832	257.99
-353	55.98	41.832	265.47
-352	55.98	41.832	265.47
-351	55.98	41.832	265.47
-350	55.98	41.832	265.47
-349	55.98	41.832	265.47
-348	55.98	41.832	265.47
-347	55.98	41.832	265.47
-346	61.578	41.832	272.95
-345	58.779	47.061	269.21
-344	58.779	47.061	269.21
-343	58.779	47.061	269.21
-342	58.779	47.061	269.21
-341	58.779	47.061	269.21
-340	61.578	47.061	269.21
-339	64.377	47.061	276.69
-338	64.377	47.061	276.69
-337	64.377	47.061	276.69
-336	64.377	47.061	276.69
-335	64.377	47.061	276.69
-334	64.377	47.061	287.9
-333	64.377	47.061	287.9
-332	64.377	47.061	287.9
-331	64.377	47.061	287.9
-330	64.377	47.061	287.9
-329	69.975	50.547	291.64
-328	69.975	50.547	287.9
-327	72.774	54.033	299.12
-326	72.774	54.033	299.12
-325	72.774	54.033	299.12
-324	72.774	54.033	299.12
-323	72.774	54.033	299.12
-322	72.774	54.033	299.12
-321	75.573	54.033	314.08
-320	78.372	55.776	325.29
-319	78.372	55.776	325.29
-318	78.372	55.776	325.29
-317	78.372	55.776	325.29
-316	78.372	55.776	325.29
-315	81.171	55.776	329.03
-314	81.171	55.776	340.25
-313	81.171	55.776	340.25
-312	81.171	55.776	340.25
-311	81.171	55.776	340.25
-310	81.171	55.776	340.25
-309	83.97	55.776	351.47
-308	83.97	55.776	351.47
-307	83.97	55.776	351.47
-306	83.97	55.776	351.47
-305	83.97	55.776	351.47
-304	86.769	55.776	355.2
-303	89.568	55.776	362.68
-302	89.568	62.748	377.64
-301	89.568	62.748	377.64
-300	89.568	62.748	377.64
-299	89.568	62.748	377.64
-298	89.568	62.748	377.64
-297	89.568	62.748	377.64
-296	89.568	66.234	381.38
-295	92.367	66.234	392.59
-294	92.367	66.234	392.59
-293	92.367	66.234	392.59
-292	92.367	66.234	392.59
-291	92.367	66.234	392.59
-290	92.367	69.72	415.03
-289	92.367	73.206	433.72
-288	92.367	73.206	433.72
-287	92.367	73.206	433.72
-286	92.367	73.206	433.72
-285	92.367	73.206	433.72
-284	92.367	73.206	441.2
-283	92.367	73.206	441.2
-282	92.367	73.206	441.2
-281	92.367	73.206	441.2
-280	92.367	73.206	441.2
-279	92.367	76.692	456.16
-278	97.965	78.435	456.16
-277	100.76	78.435	463.64
-276	100.76	78.435	463.64
-275	100.76	78.435	463.64
-274	100.76	78.435	463.64
-273	100.76	78.435	463.64
-272	100.76	78.435	463.64
-271	103.56	76.692	474.85
-270	103.56	76.692	478.59
-269	103.56	76.692	478.59
-268	103.56	76.692	478.59
-267	103.56	76.692	478.59
-266	103.56	76.692	478.59
-265	109.16	80.178	486.07
-264	109.16	81.921	489.81
-263	109.16	81.921	489.81
-262	109.16	81.921	489.81
-261	109.16	81.921	489.81
-260	109.16	81.921	489.81
-259	111.96	81.921	504.76
-258	111.96	81.921	504.76
-257	111.96	81.921	504.76
-256	111.96	81.921	504.76
-255	111.96	81.921	504.76
-254	117.56	92.379	519.72
-253	117.56	92.379	523.46
-252	120.36	94.122	527.2
-251	120.36	94.122	527.2
-250	120.36	94.122	527.2
-249	120.36	94.122	527.2
-248	120.36	94.122	527.2
-247	120.36	94.122	527.2
-246	120.36	97.608	530.94
-245	120.36	97.608	538.42
-244	120.36	97.608	538.42
-243	120.36	97.608	538.42
-242	120.36	97.608	538.42
-241	120.36	97.608	538.42
-240	120.36	104.58	553.37
-239	123.16	108.07	560.85
-238	123.16	108.07	560.85
-237	123.16	108.07	560.85
-236	123.16	108.07	560.85
-235	123.16	108.07	560.85
-234	125.96	111.55	572.07
-233	125.96	111.55	572.07
-232	125.96	111.55	572.07
-231	125.96	111.55	572.07
-230	125.96	111.55	572.07
-229	128.75	120.27	590.76
-228	131.55	123.75	598.24
-227	128.75	125.5	616.94
-226	128.75	125.5	616.94
-225	128.75	125.5	616.94
-224	128.75	125.5	616.94
-223	128.75	125.5	616.94
-222	128.75	125.5	616.94
-221	131.55	127.24	624.41
-220	131.55	130.73	631.89
-219	131.55	130.73	631.89
-218	131.55	130.73	631.89
-217	131.55	130.73	631.89
-216	131.55	130.73	631.89
-215	137.15	132.47	650.59
-214	148.35	137.7	650.59
-213	148.35	137.7	650.59
-212	148.35	137.7	650.59
-211	148.35	137.7	650.59
-210	148.35	137.7	650.59
-209	145.55	141.18	665.54
-208	145.55	141.18	665.54
-207	145.55	141.18	665.54
-206	145.55	141.18	665.54
-205	145.55	141.18	665.54
-204	153.95	141.18	669.28
-203	162.34	142.93	676.76
-202	167.94	142.93	687.98
-201	167.94	142.93	687.98
-200	167.94	142.93	687.98
-199	167.94	142.93	687.98
-198	167.94	142.93	687.98
-197	167.94	142.93	687.98
-196	173.54	146.41	699.19
-195	173.54	153.38	714.15
-194	173.54	153.38	714.15
-193	173.54	153.38	714.15
-192	173.54	153.38	714.15
-191	173.54	153.38	714.15
-190	179.14	160.36	740.32
-189	179.14	160.36	762.76
-188	179.14	160.36	762.76
-187	179.14	160.36	762.76
-186	179.14	160.36	762.76
-185	179.14	160.36	762.76
-184	184.73	163.84	773.97
-183	184.73	163.84	773.97
-182	184.73	163.84	773.97
-181	184.73	163.84	773.97
-180	184.73	163.84	773.97
-179	190.33	169.07	826.32
-178	198.73	172.56	837.54
-177	198.73	176.04	871.19
-176	198.73	176.04	871.19
-175	198.73	176.04	871.19
-174	198.73	176.04	871.19
-173	198.73	176.04	871.19
-172	198.73	176.04	871.19
-171	204.33	176.04	878.66
-170	209.93	179.53	886.14
-169	209.93	179.53	886.14
-168	209.93	179.53	886.14
-167	209.93	179.53	886.14
-166	209.93	179.53	886.14
-165	215.52	184.76	912.32
-164	223.92	186.5	945.97
-163	223.92	186.5	945.97
-162	223.92	186.5	945.97
-161	223.92	186.5	945.97
-160	223.92	186.5	945.97
-159	226.72	189.99	968.4
-158	226.72	189.99	968.4
-157	226.72	189.99	968.4
-156	226.72	189.99	968.4
-155	226.72	189.99	968.4
-154	237.92	191.73	1009.5
-153	243.51	193.47	1013.3
-152	251.91	200.45	1020.7
-151	251.91	200.45	1020.7
-150	251.91	200.45	1020.7
-149	251.91	200.45	1020.7
-148	251.91	200.45	1020.7
-147	251.91	200.45	1020.7
-146	249.11	205.67	1039.4
-145	251.91	207.42	1065.6
-144	251.91	207.42	1065.6
-143	251.91	207.42	1065.6
-142	251.91	207.42	1065.6
-141	251.91	207.42	1065.6
-140	251.91	212.65	1084.3
-139	260.31	217.88	1114.2
-138	260.31	217.88	1114.2
-137	260.31	217.88	1114.2
-136	260.31	217.88	1114.2
-135	260.31	217.88	1114.2
-134	265.91	226.59	1132.9
-133	265.91	226.59	1132.9
-132	265.91	226.59	1132.9
-131	265.91	226.59	1132.9
-130	265.91	226.59	1132.9
-129	277.1	237.05	1177.8
-128	288.3	242.28	1200.2
-127	291.1	245.76	1222.7
-126	291.1	245.76	1222.7
-125	291.1	245.76	1222.7
-124	291.1	245.76	1222.7
-123	291.1	245.76	1222.7
-122	291.1	245.76	1222.7
-121	299.49	245.76	1260
-120	302.29	250.99	1278.7
-119	302.29	250.99	1278.7
-118	302.29	250.99	1278.7
-117	302.29	250.99	1278.7
-116	302.29	250.99	1278.7
-115	310.69	249.25	1316.1
-114	313.49	254.48	1346
-113	313.49	254.48	1346
-112	313.49	254.48	1346
-111	313.49	254.48	1346
-110	313.49	254.48	1346
-109	316.29	257.96	1364.7
-108	316.29	257.96	1364.7
-107	316.29	257.96	1364.7
-106	316.29	257.96	1364.7
-105	316.29	257.96	1364.7
-104	338.68	257.96	1413.3
-103	347.08	261.45	1428.3
-102	349.88	259.71	1447
-101	349.88	259.71	1447
-100	349.88	259.71	1447
-99	349.88	259.71	1447
-98	349.88	259.71	1447
-97	349.88	259.71	1447
-96	352.67	261.45	1454.5
-95	358.27	273.65	1476.9
-94	358.27	273.65	1476.9
-93	358.27	273.65	1476.9
-92	358.27	273.65	1476.9
-91	358.27	273.65	1476.9
-90	363.87	278.88	1518
-89	363.87	282.37	1562.9
-88	363.87	282.37	1562.9
-87	363.87	282.37	1562.9
-86	363.87	282.37	1562.9
-85	363.87	282.37	1562.9
-84	366.67	284.11	1585.3
-83	366.67	284.11	1585.3
-82	366.67	284.11	1585.3
-81	366.67	284.11	1585.3
-80	366.67	284.11	1585.3
-79	386.26	298.05	1630.2
-78	391.86	305.03	1663.9
-77	391.86	312	1708.7
-76	391.86	312	1708.7
-75	391.86	312	1708.7
-74	391.86	312	1708.7
-73	391.86	312	1708.7
-72	391.86	312	1708.7
-71	400.26	315.48	1727.4
-70	400.26	317.23	1753.6
-69	400.26	317.23	1753.6
-68	400.26	317.23	1753.6
-67	400.26	317.23	1753.6
-66	400.26	317.23	1753.6
-65	405.85	322.46	1772.3
-64	403.06	322.46	1772.3
-63	403.06	322.46	1772.3
-62	403.06	322.46	1772.3
-61	403.06	322.46	1772.3
-60	403.06	322.46	1772.3
-59	411.45	327.68	1764.8
-58	411.45	327.68	1764.8
-57	411.45	327.68	1764.8
-56	411.45	327.68	1764.8
-55	411.45	327.68	1764.8
-54	425.45	332.91	1809.7
-53	433.85	338.14	1817.2
-52	433.85	346.86	1832.1
-51	433.85	346.86	1832.1
-50	433.85	346.86	1832.1
-49	433.85	346.86	1832.1
-48	433.85	346.86	1832.1
-47	433.85	346.86	1832.1
-46	436.64	352.09	1865.8
-45	439.44	350.34	1895.7
-44	439.44	350.34	1895.7
-43	439.44	350.34	1895.7
-42	439.44	350.34	1895.7
-41	439.44	350.34	1895.7
-40	442.24	357.32	1925.6
-39	442.24	362.54	1936.8
-38	442.24	362.54	1936.8
-37	442.24	362.54	1936.8
-36	442.24	362.54	1936.8
-35	442.24	362.54	1936.8
-34	439.44	366.03	1955.5
-33	439.44	366.03	1955.5
-32	439.44	366.03	1955.5
-31	439.44	366.03	1955.5
-30	439.44	366.03	1955.5
-29	467.43	366.03	1977.9
-28	470.23	367.77	1996.6
-27	467.43	369.52	2015.3
-26	467.43	369.52	2015.3
-25	467.43	369.52	2015.3
-24	467.43	369.52	2015.3
-23	467.43	369.52	2015.3
-22	467.43	369.52	2015.3
-21	470.23	369.52	2041.5
-20	473.03	373	2037.8
-19	473.03	373	2037.8
-18	473.03	373	2037.8
-17	473.03	373	2037.8
-16	473.03	373	2037.8
-15	478.63	379.97	2056.5
-14	487.03	385.2	2078.9
-13	487.03	385.2	2078.9
-12	487.03	385.2	2078.9
-11	487.03	385.2	2078.9
-10	487.03	385.2	2078.9
-9	495.42	397.4	2090.1
-8	495.42	397.4	2090.1
-7	495.42	397.4	2090.1
-6	495.42	397.4	2090.1
-5	495.42	397.4	2090.1
-4	515.02	407.86	2123.8
-3	512.22	409.61	2138.7
-2	512.22	418.32	2164.9
-1	512.22	418.32	2164.9
0	512.22	418.32	2164.9
1	512.22	418.32	2164.9
2	512.22	418.32	2164.9
3	512.22	418.32	2164.9
4	517.82	421.81	2213.5
5	531.81	423.55	2235.9
6	531.81	423.55	2235.9
7	531.81	423.55	2235.9
8	531.81	423.55	2235.9
9	531.81	423.55	2235.9
10	531.81	425.29	2262.1
11	545.8	427.04	2250.9
12	545.8	427.04	2250.9
13	545.8	427.04	2250.9
14	545.8	427.04	2250.9
15	545.8	427.04	2250.9
16	557	428.78	2265.8
17	557	428.78	2265.8
18	557	428.78	2265.8
19	557	428.78	2265.8
20	557	428.78	2265.8
21	568.2	449.69	2303.2
22	576.59	458.41	2321.9
23	579.39	453.18	2318.2
24	579.39	453.18	2318.2
25	579.39	453.18	2318.2
26	579.39	453.18	2318.2
27	579.39	453.18	2318.2
28	579.39	453.18	2318.2
29	573.79	460.15	2321.9
30	576.59	463.64	2344.4
31	576.59	463.64	2344.4
32	576.59	463.64	2344.4
33	576.59	463.64	2344.4
34	576.59	463.64	2344.4
35	584.99	458.41	2329.4
36	593.39	454.92	2325.7
37	593.39	454.92	2325.7
38	593.39	454.92	2325.7
39	593.39	454.92	2325.7
40	593.39	454.92	2325.7
41	596.19	460.15	2307
42	596.19	460.15	2307
43	596.19	460.15	2307
44	596.19	460.15	2307
45	596.19	460.15	2307
46	604.58	465.38	2359.3
47	612.98	477.58	2366.8
48	615.78	477.58	2363
49	615.78	477.58	2363
50	615.78	477.58	2363
51	615.78	477.58	2363
52	615.78	477.58	2363
53	615.78	477.58	2363
54	610.18	481.07	2378
55	615.78	491.53	2404.2
56	615.78	491.53	2404.2
57	615.78	491.53	2404.2
58	615.78	491.53	2404.2
59	615.78	491.53	2404.2
60	612.98	482.81	2396.7
61	607.38	482.81	2407.9
62	607.38	482.81	2407.9
63	607.38	482.81	2407.9
64	607.38	482.81	2407.9
65	607.38	482.81	2407.9
66	607.38	481.07	2422.9
67	607.38	481.07	2422.9
68	607.38	481.07	2422.9
69	607.38	481.07	2422.9
70	607.38	481.07	2422.9
71	607.38	479.33	2422.9
72	604.58	479.33	2426.6
73	610.18	475.84	2445.3
74	610.18	475.84	2445.3
75	610.18	475.84	2445.3
76	610.18	475.84	2445.3
77	610.18	475.84	2445.3
78	610.18	475.84	2445.3
79	618.58	481.07	2467.7
80	626.98	479.33	2475.2
81	626.98	479.33	2475.2
82	626.98	479.33	2475.2
83	626.98	479.33	2475.2
84	626.98	479.33	2475.2
85	626.98	479.33	2471.5
86	626.98	477.58	2464
87	626.98	477.58	2464
88	626.98	477.58	2464
89	626.98	477.58	2464
90	626.98	477.58	2464
91	621.38	474.1	2460.3
92	621.38	474.1	2460.3
93	621.38	474.1	2460.3
94	621.38	474.1	2460.3
95	621.38	474.1	2460.3
96	624.18	477.58	2445.3
97	618.58	477.58	2475.2
98	618.58	488.04	2486.4
99	618.58	488.04	2486.4
100	618.58	488.04	2486.4
101	618.58	488.04	2486.4
102	618.58	488.04	2486.4
103	618.58	488.04	2486.4
104	618.58	491.53	2475.2
105	621.38	496.76	2479
106	621.38	496.76	2479
107	621.38	496.76	2479
108	621.38	496.76	2479
109	621.38	496.76	2479
110	615.78	491.53	2475.2
111	610.18	486.3	2464
112	610.18	486.3	2464
113	610.18	486.3	2464
114	610.18	486.3	2464
115	610.18	486.3	2464
116	610.18	481.07	2464
117	610.18	481.07	2464
118	610.18	481.07	2464
119	610.18	481.07	2464
120	610.18	481.07	2464
121	601.78	477.58	2475.2
122	596.19	479.33	2486.4
123	601.78	477.58	2479
124	601.78	477.58	2479
125	601.78	477.58	2479
126	601.78	477.58	2479
127	601.78	477.58	2479
128	601.78	477.58	2479
129	590.59	481.07	2490.2
130	587.79	475.84	2493.9
131	587.79	475.84	2493.9
132	587.79	475.84	2493.9
133	587.79	475.84	2493.9
134	587.79	475.84	2493.9
135	582.19	484.55	2497.7
136	579.39	489.78	2505.1
137	579.39	489.78	2505.1
138	579.39	489.78	2505.1
139	579.39	489.78	2505.1
140	579.39	489.78	2505.1
141	576.59	496.76	2501.4
142	576.59	496.76	2501.4
143	576.59	496.76	2501.4
144	576.59	496.76	2501.4
145	576.59	496.76	2501.4
146	565.4	498.5	2527.6
147	562.6	501.98	2546.3
148	568.2	500.24	2557.5
149	568.2	500.24	2557.5
150	568.2	500.24	2557.5
151	568.2	500.24	2557.5
152	568.2	500.24	2557.5
153	568.2	500.24	2557.5
154	562.6	501.98	2546.3
155	562.6	500.24	2561.2
156	562.6	500.24	2561.2
157	562.6	500.24	2561.2
158	562.6	500.24	2561.2
159	562.6	500.24	2561.2
160	562.6	496.76	2576.2
161	565.4	498.5	2568.7
162	565.4	498.5	2568.7
163	565.4	498.5	2568.7
164	565.4	498.5	2568.7
165	565.4	498.5	2568.7
166	565.4	498.5	2568.7
167	565.4	498.5	2568.7
168	565.4	498.5	2568.7
169	565.4	498.5	2568.7
170	565.4	498.5	2568.7
171	557	498.5	2546.3
172	559.8	498.5	2553.7
173	562.6	501.98	2542.5
174	562.6	501.98	2542.5
175	562.6	501.98	2542.5
176	562.6	501.98	2542.5
177	562.6	501.98	2542.5
178	562.6	501.98	2542.5
179	559.8	503.73	2553.7
180	559.8	501.98	2565
181	559.8	501.98	2565
182	559.8	501.98	2565
183	559.8	501.98	2565
184	559.8	501.98	2565
185	551.4	498.5	2557.5
186	551.4	500.24	2557.5
187	551.4	500.24	2557.5
188	551.4	500.24	2557.5
189	551.4	500.24	2557.5
190	551.4	500.24	2557.5
191	548.6	500.24	2553.7
192	548.6	500.24	2553.7
193	548.6	500.24	2553.7
194	548.6	500.24	2553.7
195	548.6	500.24	2553.7
196	526.21	503.73	2568.7
197	517.81	501.98	2568.7
198	515.02	498.5	2576.2
199	515.02	498.5	2576.2
200	515.02	498.5	2576.2
201	515.02	498.5	2576.2
202	515.02	498.5	2576.2
203	515.02	498.5	2576.2
204	506.62	501.98	2546.3
205	501.02	505.47	2542.5
206	501.02	505.47	2542.5
207	501.02	505.47	2542.5
208	501.02	505.47	2542.5
209	501.02	505.47	2542.5
210	503.82	514.19	2512.6
211	503.82	508.96	2493.9
212	503.82	508.96	2493.9
213	503.82	508.96	2493.9
214	503.82	508.96	2493.9
215	503.82	508.96	2493.9
216	501.02	510.7	2475.2
217	501.02	510.7	2475.2
218	501.02	510.7	2475.2
219	501.02	510.7	2475.2
220	501.02	510.7	2475.2
221	498.22	508.96	2452.8
222	492.62	508.96	2437.8
223	492.62	505.47	2437.8
224	492.62	505.47	2437.8
225	492.62	505.47	2437.8
226	492.62	505.47	2437.8
227	492.62	505.47	2437.8
228	492.62	505.47	2437.8
229	489.82	512.44	2426.6
230	484.23	510.7	2441.6
231	484.23	510.7	2441.6
232	484.23	510.7	2441.6
233	484.23	510.7	2441.6
234	484.23	510.7	2441.6
235	478.63	505.47	2411.7
236	467.43	505.47	2407.9
237	467.43	505.47	2407.9
238	467.43	505.47	2407.9
239	467.43	505.47	2407.9
240	467.43	505.47	2407.9
241	461.83	501.98	2396.7
242	461.83	501.98	2396.7
243	461.83	501.98	2396.7
244	461.83	501.98	2396.7
245	461.83	501.98	2396.7
246	442.24	501.98	2396.7
247	436.64	498.5	2385.5
248	436.64	498.5	2374.3
249	436.64	498.5	2374.3
250	436.64	498.5	2374.3
251	436.64	498.5	2374.3
252	436.64	498.5	2374.3
253	436.64	498.5	2374.3
254	436.64	500.24	2359.3
255	436.64	505.47	2344.4
256	436.64	505.47	2344.4
257	436.64	505.47	2344.4
258	436.64	505.47	2344.4
259	436.64	505.47	2344.4
260	433.84	510.7	2329.4
261	428.25	507.21	2329.4
262	428.25	507.21	2329.4
263	428.25	507.21	2329.4
264	428.25	507.21	2329.4
265	428.25	507.21	2329.4
266	417.05	503.73	2355.6
267	417.05	503.73	2355.6
268	417.05	503.73	2355.6
269	417.05	503.73	2355.6
270	417.05	503.73	2355.6
271	394.66	495.01	2333.1
272	389.06	495.01	2340.6
273	394.66	498.5	2333.1
274	394.66	498.5	2333.1
275	394.66	498.5	2333.1
276	394.66	498.5	2333.1
277	394.66	498.5	2333.1
278	394.66	498.5	2333.1
279	394.66	496.76	2318.2
280	397.46	496.76	2314.4
281	397.46	496.76	2314.4
282	397.46	496.76	2314.4
283	397.46	496.76	2314.4
284	397.46	496.76	2314.4
285	394.66	495.01	2310.7
286	391.86	493.27	2307
287	391.86	493.27	2307
288	391.86	493.27	2307
289	391.86	493.27	2307
290	391.86	493.27	2307
291	380.66	491.53	2288.3
292	380.66	491.53	2288.3
293	380.66	491.53	2288.3
294	380.66	491.53	2288.3
295	380.66	491.53	2288.3
296	375.07	484.55	2292
297	369.47	481.07	2288.3
298	366.67	482.81	2284.5
299	366.67	482.81	2284.5
300	366.67	482.81	2284.5
301	366.67	482.81	2284.5
302	366.67	482.81	2284.5
303	366.67	482.81	2284.5
304	361.07	479.33	2262.1
305	358.27	477.58	2221
306	358.27	477.58	2221
307	358.27	477.58	2221
308	358.27	477.58	2221
309	358.27	477.58	2221
310	363.87	484.55	2206
311	355.47	488.04	2176.1
312	355.47	488.04	2176.1
313	355.47	488.04	2176.1
314	355.47	488.04	2176.1
315	355.47	488.04	2176.1
316	358.27	488.04	2179.8
317	358.27	488.04	2179.8
318	358.27	488.04	2179.8
319	358.27	488.04	2179.8
320	358.27	488.04	2179.8
321	355.47	479.33	2138.7
322	349.88	467.12	2131.2
323	344.28	463.64	2127.5
324	344.28	463.64	2127.5
325	344.28	463.64	2127.5
326	344.28	463.64	2127.5
327	344.28	463.64	2127.5
328	344.28	463.64	2127.5
329	349.88	456.67	2108.8
330	347.08	453.18	2112.5
331	347.08	453.18	2112.5
332	347.08	453.18	2112.5
333	347.08	453.18	2112.5
334	347.08	453.18	2112.5
335	355.47	447.95	2101.3
336	355.47	447.95	2112.5
337	355.47	447.95	2112.5
338	355.47	447.95	2112.5
339	355.47	447.95	2112.5
340	355.47	447.95	2112.5
341	352.67	442.72	2093.8
342	352.67	442.72	2093.8
343	352.67	442.72	2093.8
344	352.67	442.72	2093.8
345	352.67	442.72	2093.8
346	344.28	437.49	2067.7
347	347.08	442.72	2082.6
348	341.48	444.47	2090.1
349	341.48	444.47	2090.1
350	341.48	444.47	2090.1
351	341.48	444.47	2090.1
352	341.48	444.47	2090.1
353	341.48	444.47	2090.1
354	341.48	437.49	2086.4
355	335.88	437.49	2108.8
356	335.88	437.49	2108.8
357	335.88	437.49	2108.8
358	335.88	437.49	2108.8
359	335.88	437.49	2108.8
360	335.88	432.26	2101.3
361	335.88	432.26	2101.3
362	335.88	432.26	2101.3
363	335.88	432.26	2101.3
364	335.88	432.26	2101.3
365	335.88	432.26	2101.3
366	333.08	430.52	2090.1
367	333.08	430.52	2090.1
368	333.08	430.52	2090.1
369	333.08	430.52	2090.1
370	333.08	430.52	2090.1
371	338.68	427.04	2078.9
372	338.68	425.29	2067.7
373	338.68	420.06	2052.7
374	338.68	420.06	2052.7
375	338.68	420.06	2052.7
376	338.68	420.06	2052.7
377	338.68	420.06	2052.7
378	338.68	420.06	2052.7
379	338.68	413.09	2026.5
380	333.08	413.09	2022.8
381	333.08	413.09	2022.8
382	333.08	413.09	2022.8
383	333.08	413.09	2022.8
384	333.08	413.09	2022.8
385	349.88	411.35	2026.5
386	349.88	409.61	2011.6
387	349.88	409.61	2011.6
388	349.88	409.61	2011.6
389	349.88	409.61	2011.6
390	349.88	409.61	2011.6
391	355.47	409.61	2019.1
392	355.47	409.61	2019.1
393	355.47	409.61	2019.1
394	355.47	409.61	2019.1
395	355.47	409.61	2019.1
396	349.88	409.61	2011.6
397	349.88	413.09	1996.6
398	347.08	416.58	1992.9
399	347.08	416.58	1992.9
400	347.08	416.58	1992.9
401	347.08	416.58	1992.9
402	347.08	416.58	1992.9
403	347.08	416.58	1992.9
404	352.67	404.38	1985.4
405	355.47	393.92	1981.7
406	355.47	393.92	1981.7
407	355.47	393.92	1981.7
408	355.47	393.92	1981.7
409	355.47	393.92	1981.7
410	355.47	386.95	1981.7
411	358.27	388.69	1966.7
412	358.27	388.69	1966.7
413	358.27	388.69	1966.7
414	358.27	388.69	1966.7
415	358.27	388.69	1966.7
416	358.27	385.2	1955.5
417	358.27	385.2	1955.5
418	358.27	385.2	1955.5
419	358.27	385.2	1955.5
420	358.27	385.2	1955.5
421	355.47	381.72	1910.6
422	352.67	376.49	1891.9
423	352.67	374.75	1891.9
424	352.67	374.75	1891.9
425	352.67	374.75	1891.9
426	352.67	374.75	1891.9
427	352.67	374.75	1891.9
428	352.67	374.75	1891.9
429	349.88	371.26	1880.7
430	349.88	373	1858.3
431	349.88	373	1858.3
432	349.88	373	1858.3
433	349.88	373	1858.3
434	349.88	373	1858.3
435	347.08	374.75	1858.3
436	347.08	371.26	1839.6
437	347.08	371.26	1839.6
438	347.08	371.26	1839.6
439	347.08	371.26	1839.6
440	347.08	371.26	1839.6
441	344.28	369.52	1835.8
442	344.28	369.52	1835.8
443	344.28	369.52	1835.8
444	344.28	369.52	1835.8
445	344.28	369.52	1835.8
446	344.28	371.26	1835.8
447	341.48	373	1824.6
448	335.88	369.52	1809.7
449	335.88	369.52	1809.7
450	335.88	369.52	1809.7
451	335.88	369.52	1809.7
452	335.88	369.52	1809.7
453	335.88	369.52	1809.7
454	338.68	367.77	1794.7
455	341.48	367.77	1791
456	341.48	367.77	1791
457	341.48	367.77	1791
458	341.48	367.77	1791
459	341.48	367.77	1791
460	338.68	366.03	1757.3
461	335.88	369.52	1757.3
462	335.88	369.52	1757.3
463	335.88	369.52	1757.3
464	335.88	369.52	1757.3
465	335.88	369.52	1757.3
466	335.88	366.03	1761.1
467	335.88	366.03	1761.1
468	335.88	366.03	1761.1
469	335.88	366.03	1761.1
470	335.88	366.03	1761.1
471	327.48	366.03	1757.3
472	321.89	364.29	1776
473	313.49	360.8	1757.3
474	313.49	360.8	1757.3
475	313.49	360.8	1757.3
476	313.49	360.8	1757.3
477	313.49	360.8	1757.3
478	313.49	360.8	1757.3
479	313.49	360.8	1761.1
480	307.89	350.34	1761.1
481	307.89	350.34	1761.1
482	307.89	350.34	1761.1
483	307.89	350.34	1761.1
484	307.89	350.34	1761.1
485	302.29	341.63	1761.1
486	299.49	343.37	1757.3
487	299.49	343.37	1757.3
488	299.49	343.37	1757.3
489	299.49	343.37	1757.3
490	299.49	343.37	1757.3
491	305.09	339.89	1779.8
492	305.09	339.89	1779.8
493	305.09	339.89	1779.8
494	305.09	339.89	1779.8
495	305.09	339.89	1779.8
496	299.49	343.37	1742.4
497	302.29	343.37	1734.9
498	299.49	341.63	1719.9
499	299.49	341.63	1719.9
500	299.49	341.63	1719.9
501	299.49	341.63	1719.9
502	299.49	341.63	1719.9
503	299.49	341.63	1719.9
504	296.69	338.14	1723.7
505	302.29	336.4	1705
506	302.29	336.4	1705
507	302.29	336.4	1705
508	302.29	336.4	1705
509	302.29	336.4	1705
510	305.09	334.66	1701.2
511	305.09	338.14	1682.6
512	305.09	338.14	1682.6
513	305.09	338.14	1682.6
514	305.09	338.14	1682.6
515	305.09	338.14	1682.6
516	305.09	339.89	1675.1
517	305.09	339.89	1675.1
518	305.09	339.89	1675.1
519	305.09	339.89	1675.1
520	305.09	339.89	1675.1
521	305.09	336.4	1690
522	299.49	331.17	1682.6
523	299.49	329.43	1660.1
524	299.49	329.43	1660.1
525	299.49	329.43	1660.1
526	299.49	329.43	1660.1
527	299.49	329.43	1660.1
528	299.49	329.43	1660.1
529	296.69	327.68	1663.9
530	291.1	324.2	1652.6
531	291.1	324.2	1652.6
532	291.1	324.2	1652.6
533	291.1	324.2	1652.6
534	291.1	324.2	1652.6
535	291.1	320.71	1648.9
536	288.3	318.97	1656.4
537	288.3	318.97	1656.4
538	288.3	318.97	1656.4
539	288.3	318.97	1656.4
540	288.3	318.97	1656.4
541	285.5	317.23	1652.6
542	285.5	317.23	1652.6
543	285.5	317.23	1652.6
544	285.5	317.23	1652.6
545	285.5	317.23	1652.6
546	282.7	317.23	1648.9
547	282.7	318.97	1622.7
548	285.5	310.25	1607.8
549	285.5	310.25	1607.8
550	285.5	310.25	1607.8
551	285.5	310.25	1607.8
552	285.5	310.25	1607.8
553	285.5	310.25	1607.8
554	282.7	303.28	1604
555	282.7	299.8	1589.1
556	282.7	299.8	1589.1
557	282.7	299.8	1589.1
558	282.7	299.8	1589.1
559	282.7	299.8	1589.1
560	279.9	299.8	1589.1
561	282.7	292.82	1589.1
562	282.7	292.82	1589.1
563	282.7	292.82	1589.1
564	282.7	292.82	1589.1
565	282.7	292.82	1589.1
566	282.7	291.08	1577.9
567	282.7	291.08	1577.9
568	282.7	291.08	1577.9
569	282.7	291.08	1577.9
570	282.7	291.08	1577.9
571	277.1	287.6	1581.6
572	277.1	282.37	1585.3
573	277.1	289.34	1574.1
574	277.1	289.34	1574.1
575	277.1	289.34	1574.1
576	277.1	289.34	1574.1
577	277.1	289.34	1574.1
578	277.1	289.34	1574.1
579	277.1	292.82	1574.1
580	274.3	289.34	1551.7
581	274.3	289.34	1551.7
582	274.3	289.34	1551.7
583	274.3	289.34	1551.7
584	274.3	289.34	1551.7
585	265.91	289.34	1555.4
586	274.3	287.6	1570.4
587	274.3	287.6	1570.4
588	274.3	287.6	1570.4
589	274.3	287.6	1570.4
590	274.3	287.6	1570.4
591	274.3	280.62	1562.9
592	274.3	280.62	1562.9
593	274.3	280.62	1562.9
594	274.3	280.62	1562.9
595	274.3	280.62	1562.9
596	274.3	278.88	1566.6
597	268.7	270.17	1562.9
598	279.9	271.91	1559.2
599	279.9	271.91	1559.2
600	279.9	271.91	1559.2
601	279.9	271.91	1559.2
602	279.9	271.91	1559.2
603	279.9	271.91	1559.2
604	277.1	268.42	1559.2
605	277.1	277.14	1562.9
606	277.1	277.14	1562.9
607	277.1	277.14	1562.9
608	277.1	277.14	1562.9
609	277.1	277.14	1562.9
610	274.3	275.39	1577.9
611	277.1	277.14	1570.4
612	277.1	277.14	1570.4
613	277.1	277.14	1570.4
614	277.1	277.14	1570.4
615	277.1	277.14	1570.4
616	279.9	277.14	1574.1
617	279.9	277.14	1574.1
618	279.9	277.14	1574.1
619	279.9	277.14	1574.1
620	279.9	277.14	1574.1
621	285.5	280.62	1555.4
622	285.5	275.39	1547.9
623	282.7	270.17	1551.7
624	282.7	270.17	1551.7
625	282.7	270.17	1551.7
626	282.7	270.17	1551.7
627	282.7	270.17	1551.7
628	282.7	270.17	1551.7
629	274.3	270.17	1536.7
630	279.9	278.88	1536.7
631	279.9	278.88	1536.7
632	279.9	278.88	1536.7
633	279.9	278.88	1536.7
634	279.9	278.88	1536.7
635	274.3	280.62	1540.5
636	274.3	278.88	1544.2
637	274.3	278.88	1544.2
638	274.3	278.88	1544.2
639	274.3	278.88	1544.2
640	274.3	278.88	1544.2
641	277.1	278.88	1544.2
642	277.1	278.88	1544.2
643	277.1	278.88	1544.2
644	277.1	278.88	1544.2
645	277.1	278.88	1544.2
646	282.7	280.62	1581.6
647	288.3	282.37	1589.1
648	282.7	280.62	1596.6
649	282.7	280.62	1596.6
650	282.7	280.62	1596.6
651	282.7	280.62	1596.6
652	282.7	280.62	1596.6
653	282.7	280.62	1596.6
654	285.5	284.11	1600.3
655	279.9	284.11	1604
656	279.9	284.11	1604
657	279.9	284.11	1604
658	279.9	284.11	1604
659	279.9	284.11	1604
660	268.7	278.88	1600.3
661	265.91	282.37	1592.8
662	265.91	282.37	1592.8
663	265.91	282.37	1592.8
664	265.91	282.37	1592.8
665	265.91	282.37	1592.8
666	263.11	282.37	1589.1
667	263.11	282.37	1589.1
668	263.11	282.37	1589.1
669	263.11	282.37	1589.1
670	263.11	282.37	1589.1
671	265.91	280.62	1615.2
672	268.7	280.62	1633.9
673	274.3	280.62	1656.4
674	274.3	280.62	1656.4
675	274.3	280.62	1656.4
676	274.3	280.62	1656.4
677	274.3	280.62	1656.4
678	274.3	280.62	1656.4
679	277.1	282.37	1648.9
680	277.1	277.14	1626.5
681	277.1	277.14	1626.5
682	277.1	277.14	1626.5
683	277.1	277.14	1626.5
684	277.1	277.14	1626.5
685	277.1	277.14	1626.5
686	277.1	275.39	1622.7
687	277.1	275.39	1622.7
688	277.1	275.39	1622.7
689	277.1	275.39	1622.7
690	277.1	275.39	1622.7
691	268.7	275.39	1641.4
692	268.7	275.39	1641.4
693	268.7	275.39	1641.4
694	268.7	275.39	1641.4
695	268.7	275.39	1641.4
696	254.71	270.17	1622.7
697	254.71	275.39	1607.8
698	254.71	277.14	1611.5
699	254.71	277.14	1611.5
700	254.71	277.14	1611.5
701	254.71	277.14	1611.5
702	254.71	277.14	1611.5
703	254.71	277.14	1611.5
704	257.51	277.14	1611.5
705	260.31	278.88	1600.3
706	260.31	278.88	1600.3
707	260.31	278.88	1600.3
708	260.31	278.88	1600.3
709	260.31	278.88	1600.3
710	260.31	284.11	1585.3
711	265.91	284.11	1585.3
712	265.91	284.11	1585.3
713	265.91	284.11	1585.3
714	265.91	284.11	1585.3
715	265.91	284.11	1585.3
716	274.3	280.62	1577.9
717	274.3	280.62	1577.9
718	274.3	280.62	1577.9
719	274.3	280.62	1577.9
720	274.3	280.62	1577.9
721	277.1	280.62	1577.9
722	277.1	282.37	1577.9
723	279.9	284.11	1581.6
724	279.9	284.11	1581.6
725	279.9	284.11	1581.6
726	279.9	284.11	1581.6
727	279.9	284.11	1581.6
728	279.9	284.11	1581.6
729	277.1	289.34	1596.6
730	274.3	294.57	1596.6
731	274.3	294.57	1596.6
732	274.3	294.57	1596.6
733	274.3	294.57	1596.6
734	274.3	294.57	1596.6
735	271.5	289.34	1607.8
736	271.5	289.34	1611.5
737	271.5	289.34	1611.5
738	271.5	289.34	1611.5
739	271.5	289.34	1611.5
740	271.5	289.34	1611.5
741	271.5	287.6	1604
742	271.5	287.6	1604
743	271.5	287.6	1604
744	271.5	287.6	1604
745	271.5	287.6	1604
746	274.3	282.37	1615.2
747	282.7	284.11	1600.3
748	279.9	277.14	1581.6
749	279.9	277.14	1581.6
750	279.9	277.14	1581.6
751	279.9	277.14	1581.6
752	279.9	277.14	1581.6
753	279.9	277.14	1581.6
754	279.9	277.14	1581.6
755	277.1	278.88	1570.4
756	277.1	278.88	1570.4
757	277.1	278.88	1570.4
758	277.1	278.88	1570.4
759	277.1	278.88	1570.4
760	268.7	277.14	1562.9
761	274.3	275.39	1570.4
762	274.3	275.39	1570.4
763	274.3	275.39	1570.4
764	274.3	275.39	1570.4
765	274.3	275.39	1570.4
766	277.1	277.14	1562.9
767	277.1	277.14	1562.9
768	277.1	277.14	1562.9
769	277.1	277.14	1562.9
770	277.1	277.14	1562.9
771	271.5	280.62	1536.7
772	271.5	291.08	1533
773	274.3	287.6	1533
774	274.3	287.6	1533
775	274.3	287.6	1533
776	274.3	287.6	1533
777	274.3	287.6	1533
778	274.3	287.6	1533
779	268.7	287.6	1514.3
780	263.11	289.34	1506.8
781	263.11	289.34	1506.8
782	263.11	289.34	1506.8
783	263.11	289.34	1506.8
784	263.11	289.34	1506.8
785	268.7	287.6	1495.6
786	274.3	287.6	1499.3
787	274.3	287.6	1499.3
788	274.3	287.6	1499.3
789	274.3	287.6	1499.3
790	274.3	287.6	1499.3
791	277.1	285.85	1480.6
792	277.1	285.85	1480.6
793	277.1	285.85	1480.6
794	277.1	285.85	1480.6
795	277.1	285.85	1480.6
796	277.1	282.37	1473.2
797	277.1	282.37	1476.9
798	282.7	284.11	1473.2
799	282.7	284.11	1473.2
800	282.7	284.11	1473.2
801	282.7	284.11	1473.2
802	282.7	284.11	1473.2
803	282.7	284.11	1473.2
804	285.5	291.08	1469.4
805	285.5	289.34	1480.6
806	285.5	289.34	1480.6
807	285.5	289.34	1480.6
808	285.5	289.34	1480.6
809	285.5	289.34	1480.6
810	279.9	291.08	1476.9
811	277.1	292.82	1484.4
812	277.1	292.82	1484.4
813	277.1	292.82	1484.4
814	277.1	292.82	1484.4
815	277.1	292.82	1484.4
816	274.3	294.57	1488.1
817	274.3	294.57	1488.1
818	274.3	294.57	1488.1
819	274.3	294.57	1488.1
820	274.3	294.57	1488.1
821	271.5	284.11	1499.3
822	271.5	280.62	1506.8
823	271.5	277.14	1503.1
824	271.5	277.14	1503.1
825	271.5	277.14	1503.1
826	271.5	277.14	1503.1
827	271.5	277.14	1503.1
828	271.5	277.14	1503.1
829	268.7	278.88	1514.3
830	268.7	273.65	1510.6
831	268.7	273.65	1510.6
832	268.7	273.65	1510.6
833	268.7	273.65	1510.6
834	268.7	273.65	1510.6
835	265.91	275.39	1491.9
836	260.31	273.65	1473.2
837	260.31	273.65	1473.2
838	260.31	273.65	1473.2
839	260.31	273.65	1473.2
840	260.31	273.65	1473.2
841	260.31	273.65	1473.2
842	260.31	273.65	1473.2
843	260.31	273.65	1473.2
844	260.31	273.65	1473.2
845	260.31	273.65	1473.2
846	265.91	271.91	1454.5
847	260.31	268.42	1450.7
848	260.31	266.68	1443.3
849	260.31	266.68	1443.3
850	260.31	266.68	1443.3
851	260.31	266.68	1443.3
852	260.31	266.68	1443.3
853	260.31	266.68	1443.3
854	263.11	264.94	1443.3
855	263.11	261.45	1439.5
856	263.11	261.45	1439.5
857	263.11	261.45	1439.5
858	263.11	261.45	1439.5
859	263.11	261.45	1439.5
860	263.11	259.71	1435.8
861	260.31	256.22	1424.6
862	260.31	256.22	1424.6
863	260.31	256.22	1424.6
864	260.31	256.22	1424.6
865	260.31	256.22	1424.6
866	260.31	252.74	1413.3
867	260.31	252.74	1413.3
868	260.31	252.74	1413.3
869	260.31	252.74	1413.3
870	260.31	252.74	1413.3
871	260.31	252.74	1390.9
872	260.31	252.74	1368.5
873	257.51	247.51	1357.3
874	257.51	247.51	1357.3
875	257.51	247.51	1357.3
876	257.51	247.51	1357.3
877	257.51	247.51	1357.3
878	257.51	247.51	1357.3
879	257.51	247.51	1342.3
880	260.31	245.76	1334.8
881	260.31	245.76	1334.8
882	260.31	245.76	1334.8
883	260.31	245.76	1334.8
884	260.31	245.76	1334.8
885	263.11	249.25	1342.3
886	260.31	247.51	1353.5
887	260.31	247.51	1353.5
888	260.31	247.51	1353.5
889	260.31	247.51	1353.5
890	260.31	247.51	1353.5
891	260.31	245.76	1349.8
892	260.31	245.76	1349.8
893	260.31	245.76	1349.8
894	260.31	245.76	1349.8
895	260.31	245.76	1349.8
896	268.7	249.25	1342.3
897	271.5	250.99	1357.3
898	268.7	250.99	1368.5
899	268.7	250.99	1368.5
900	268.7	250.99	1368.5
901	268.7	250.99	1368.5
902	268.7	250.99	1368.5
903	268.7	250.99	1368.5
904	265.91	249.25	1368.5
905	268.7	240.53	1364.7
906	268.7	240.53	1364.7
907	268.7	240.53	1364.7
908	268.7	240.53	1364.7
909	268.7	240.53	1364.7
910	268.7	242.28	1346
911	271.5	242.28	1342.3
912	271.5	242.28	1342.3
913	271.5	242.28	1342.3
914	271.5	242.28	1342.3
915	271.5	242.28	1342.3
916	271.5	244.02	1346
917	271.5	244.02	1346
918	271.5	244.02	1346
919	271.5	244.02	1346
920	271.5	244.02	1346
921	268.7	252.74	1346
922	263.11	250.99	1338.6
923	265.91	249.25	1342.3
924	265.91	249.25	1342.3
925	265.91	249.25	1342.3
926	265.91	249.25	1342.3
927	265.91	249.25	1342.3
928	265.91	249.25	1342.3
929	263.11	249.25	1342.3
930	260.31	250.99	1349.8
931	260.31	250.99	1349.8
932	260.31	250.99	1349.8
933	260.31	250.99	1349.8
934	260.31	250.99	1349.8
935	260.31	250.99	1342.3
936	251.91	252.74	1346
937	251.91	252.74	1346
938	251.91	252.74	1346
939	251.91	252.74	1346
940	251.91	252.74	1346
941	257.51	252.74	1346
942	257.51	252.74	1346
943	257.51	252.74	1346
944	257.51	252.74	1346
945	257.51	252.74	1346
946	257.51	245.76	1338.6
947	263.11	240.53	1342.3
948	254.71	238.79	1323.6
949	254.71	238.79	1323.6
950	254.71	238.79	1323.6
951	254.71	238.79	1323.6
952	254.71	238.79	1323.6
953	254.71	238.79	1323.6
954	265.91	238.79	1308.6
955	265.91	237.05	1323.6
956	265.91	237.05	1323.6
957	265.91	237.05	1323.6
958	265.91	237.05	1323.6
959	265.91	237.05	1323.6
960	265.91	237.05	1323.6
961	260.31	237.05	1312.4
962	260.31	237.05	1312.4
963	260.31	237.05	1312.4
964	260.31	237.05	1312.4
965	260.31	237.05	1312.4
966	260.31	233.56	1312.4
967	260.31	233.56	1312.4
968	260.31	233.56	1312.4
969	260.31	233.56	1312.4
970	260.31	233.56	1312.4
971	251.91	237.05	1301.2
972	246.31	240.53	1282.5
973	251.91	240.53	1275
974	251.91	240.53	1275
975	251.91	240.53	1275
976	251.91	240.53	1275
977	251.91	240.53	1275
978	251.91	240.53	1275
979	249.11	235.31	1290
980	251.91	235.31	1278.7
981	251.91	235.31	1278.7
982	251.91	235.31	1278.7
983	251.91	235.31	1278.7
984	251.91	235.31	1278.7
985	249.11	233.56	1263.8
986	249.11	231.82	1263.8
987	249.11	231.82	1263.8
988	249.11	231.82	1263.8
989	249.11	231.82	1263.8
990	249.11	231.82	1263.8
991	246.31	231.82	1256.3
992	246.31	231.82	1256.3
993	246.31	231.82	1256.3
994	246.31	231.82	1256.3
995	246.31	231.82	1256.3
996	249.11	228.33	1275
997	246.31	219.62	1271.3
998	243.51	217.88	1282.5
[truncated: 2 more rows]

## Sheet: Fig3K
distance from TSS	dark	AM25-low	AM-25 high
-1000	20.448	44.977	98.127
-999	20.448	44.977	98.127
-998	20.448	44.977	98.127
-997	20.448	44.977	98.127
-996	18.988	44.977	98.127
-995	18.988	44.977	93.766
-994	18.988	44.977	93.766
-993	18.988	44.977	93.766
-992	18.988	44.977	93.766
-991	18.988	44.977	93.766
-990	17.527	47.344	93.766
-989	17.527	47.344	93.766
-988	17.527	47.344	93.766
-987	17.527	47.344	93.766
-986	17.527	47.344	93.766
-985	17.527	47.344	93.766
-984	17.527	42.61	82.863
-983	17.527	42.61	82.863
-982	17.527	42.61	82.863
-981	17.527	42.61	82.863
-980	17.527	42.61	82.863
-979	17.527	42.61	82.863
-978	17.527	42.61	82.863
-977	17.527	44.977	82.863
-976	17.527	44.977	82.863
-975	17.527	44.977	82.863
-974	17.527	44.977	82.863
-973	17.527	44.977	82.863
-972	17.527	44.977	82.863
-971	17.527	44.977	82.863
-970	16.067	44.977	82.863
-969	16.067	44.977	82.863
-968	16.067	44.977	82.863
-967	16.067	44.977	82.863
-966	16.067	44.977	82.863
-965	16.067	44.977	80.682
-964	16.067	44.977	80.682
-963	16.067	44.977	80.682
-962	16.067	44.977	80.682
-961	16.067	44.977	80.682
-960	16.067	44.977	80.682
-959	16.067	42.61	80.682
-958	16.067	42.61	80.682
-957	16.067	42.61	80.682
-956	16.067	42.61	80.682
-955	16.067	42.61	80.682
-954	16.067	42.61	80.682
-953	16.067	42.61	80.682
-952	16.067	44.977	80.682
-951	16.067	44.977	80.682
-950	16.067	44.977	80.682
-949	16.067	44.977	80.682
-948	16.067	44.977	80.682
-947	16.067	44.977	80.682
-946	16.067	44.977	80.682
-945	16.067	44.977	80.682
-944	16.067	44.977	80.682
-943	16.067	44.977	80.682
-942	16.067	44.977	80.682
-941	16.067	44.977	80.682
-940	16.067	44.977	78.502
-939	16.067	44.977	78.502
-938	16.067	44.977	78.502
-937	16.067	44.977	78.502
-936	16.067	44.977	78.502
-935	16.067	44.977	78.502
-934	14.606	47.344	80.682
-933	14.606	47.344	80.682
-932	14.606	47.344	80.682
-931	14.606	47.344	80.682
-930	14.606	47.344	80.682
-929	14.606	44.977	80.682
-928	14.606	40.242	80.682
-927	16.067	40.242	80.682
-926	16.067	40.242	80.682
-925	16.067	40.242	80.682
-924	16.067	40.242	80.682
-923	16.067	40.242	80.682
-922	16.067	40.242	80.682
-921	16.067	40.242	80.682
-920	17.527	40.242	80.682
-919	17.527	40.242	80.682
-918	17.527	40.242	80.682
-917	17.527	40.242	80.682
-916	17.527	40.242	80.682
-915	17.527	40.242	80.682
-914	17.527	40.242	80.682
-913	17.527	40.242	80.682
-912	17.527	40.242	80.682
-911	17.527	40.242	80.682
-910	17.527	40.242	80.682
-909	16.067	33.141	76.321
-908	16.067	33.141	76.321
-907	16.067	33.141	76.321
-906	16.067	33.141	76.321
-905	16.067	33.141	76.321
-904	16.067	30.774	76.321
-903	16.067	30.774	78.502
-902	17.527	28.406	78.502
-901	17.527	28.406	78.502
-900	17.527	28.406	78.502
-899	17.527	28.406	78.502
-898	17.527	28.406	78.502
-897	17.527	28.406	78.502
-896	17.527	28.406	78.502
-895	18.988	28.406	78.502
-894	18.988	28.406	78.502
-893	18.988	28.406	78.502
-892	18.988	28.406	78.502
-891	18.988	28.406	78.502
-890	18.988	26.039	78.502
-889	18.988	26.039	78.502
-888	18.988	26.039	78.502
-887	18.988	26.039	78.502
-886	18.988	26.039	78.502
-885	18.988	26.039	78.502
-884	16.067	18.938	71.96
-883	16.067	18.938	71.96
-882	16.067	18.938	71.96
-881	16.067	18.938	71.96
-880	16.067	18.938	71.96
-879	16.067	18.938	69.779
-878	16.067	18.938	69.779
-877	16.067	18.938	67.599
-876	16.067	18.938	67.599
-875	16.067	18.938	67.599
-874	16.067	18.938	67.599
-873	16.067	18.938	67.599
-872	16.067	18.938	67.599
-871	16.067	18.938	67.599
-870	16.067	18.938	67.599
-869	16.067	18.938	67.599
-868	16.067	18.938	67.599
-867	16.067	18.938	67.599
-866	16.067	18.938	67.599
-865	16.067	18.938	67.599
-864	16.067	18.938	67.599
-863	16.067	18.938	67.599
-862	16.067	18.938	67.599
-861	16.067	18.938	67.599
-860	16.067	18.938	67.599
-859	14.606	14.203	52.334
-858	14.606	14.203	52.334
-857	14.606	14.203	52.334
-856	14.606	14.203	52.334
-855	14.606	14.203	52.334
-854	14.606	14.203	52.334
-853	14.606	14.203	52.334
-852	14.606	14.203	52.334
-851	14.606	14.203	52.334
-850	14.606	14.203	52.334
-849	14.606	14.203	52.334
-848	14.606	14.203	52.334
-847	14.606	14.203	52.334
-846	14.606	14.203	52.334
-845	13.145	11.836	52.334
-844	13.145	11.836	52.334
-843	13.145	11.836	52.334
-842	13.145	11.836	52.334
-841	13.145	11.836	52.334
-840	11.685	11.836	52.334
-839	11.685	11.836	52.334
-838	11.685	11.836	52.334
-837	11.685	11.836	52.334
-836	11.685	11.836	52.334
-835	11.685	11.836	52.334
-834	11.685	11.836	43.612
-833	11.685	11.836	43.612
-832	11.685	11.836	43.612
-831	11.685	11.836	43.612
-830	11.685	11.836	43.612
-829	11.685	11.836	43.612
-828	11.685	11.836	41.431
-827	8.7636	11.836	41.431
-826	8.7636	11.836	41.431
-825	8.7636	11.836	41.431
-824	8.7636	11.836	41.431
-823	8.7636	11.836	41.431
-822	8.7636	11.836	41.431
-821	8.7636	11.836	41.431
-820	8.7636	11.836	41.431
-819	8.7636	11.836	41.431
-818	8.7636	11.836	41.431
-817	8.7636	11.836	41.431
-816	8.7636	11.836	41.431
-815	8.7636	11.836	41.431
-814	8.7636	11.836	41.431
-813	8.7636	11.836	41.431
-812	8.7636	11.836	41.431
-811	8.7636	11.836	41.431
-810	8.7636	11.836	41.431
-809	8.7636	11.836	34.89
-808	8.7636	11.836	34.89
-807	8.7636	11.836	34.89
-806	8.7636	11.836	34.89
-805	8.7636	11.836	34.89
-804	8.7636	11.836	34.89
-803	8.7636	11.836	34.89
-802	8.7636	11.836	34.89
-801	8.7636	11.836	34.89
-800	8.7636	11.836	34.89
-799	8.7636	11.836	34.89
-798	8.7636	11.836	34.89
-797	8.7636	11.836	34.89
-796	10.224	11.836	34.89
-795	10.224	11.836	34.89
-794	10.224	11.836	34.89
-793	10.224	11.836	34.89
-792	10.224	11.836	34.89
-791	10.224	11.836	34.89
-790	10.224	11.836	34.89
-789	11.685	14.203	34.89
-788	11.685	14.203	34.89
-787	11.685	14.203	34.89
-786	11.685	14.203	34.89
-785	11.685	14.203	34.89
-784	11.685	11.836	28.348
-783	11.685	11.836	28.348
-782	11.685	11.836	28.348
-781	11.685	11.836	28.348
-780	11.685	11.836	28.348
-779	11.685	11.836	28.348
-778	11.685	11.836	28.348
-777	11.685	9.4688	28.348
-776	11.685	9.4688	28.348
-775	11.685	9.4688	28.348
-774	11.685	9.4688	28.348
-773	11.685	9.4688	28.348
-772	11.685	9.4688	28.348
-771	11.685	9.4688	28.348
-770	11.685	9.4688	28.348
-769	11.685	9.4688	28.348
-768	11.685	9.4688	28.348
-767	11.685	9.4688	28.348
-766	11.685	9.4688	28.348
-765	11.685	9.4688	28.348
-764	11.685	9.4688	28.348
-763	11.685	9.4688	28.348
-762	11.685	9.4688	28.348
-761	11.685	9.4688	28.348
-760	11.685	9.4688	28.348
-759	7.303	2.3672	15.264
-758	7.303	2.3672	15.264
-757	7.303	2.3672	15.264
-756	7.303	2.3672	15.264
-755	7.303	2.3672	15.264
-754	7.303	2.3672	15.264
-753	7.303	2.3672	15.264
-752	7.303	2.3672	15.264
-751	7.303	2.3672	15.264
-750	7.303	2.3672	15.264
-749	7.303	2.3672	15.264
-748	7.303	2.3672	15.264
-747	7.303	2.3672	15.264
-746	7.303	2.3672	17.445
-745	5.8424	2.3672	17.445
-744	5.8424	2.3672	17.445
-743	5.8424	2.3672	17.445
-742	5.8424	2.3672	17.445
-741	5.8424	2.3672	17.445
-740	5.8424	2.3672	17.445
-739	5.8424	2.3672	17.445
-738	5.8424	2.3672	17.445
-737	5.8424	2.3672	17.445
-736	5.8424	2.3672	17.445
-735	5.8424	2.3672	17.445
-734	4.3818	2.3672	8.7224
-733	4.3818	2.3672	8.7224
-732	4.3818	2.3672	8.7224
-731	4.3818	2.3672	8.7224
-730	4.3818	2.3672	8.7224
-729	4.3818	2.3672	10.903
-728	4.3818	2.3672	10.903
-727	4.3818	2.3672	10.903
-726	4.3818	2.3672	10.903
-725	4.3818	2.3672	10.903
-724	4.3818	2.3672	10.903
-723	4.3818	2.3672	10.903
-722	4.3818	2.3672	10.903
-721	4.3818	2.3672	10.903
-720	4.3818	2.3672	10.903
-719	4.3818	2.3672	10.903
-718	4.3818	2.3672	10.903
-717	4.3818	2.3672	10.903
-716	4.3818	2.3672	10.903
-715	4.3818	2.3672	10.903
-714	4.3818	0	10.903
-713	4.3818	0	10.903
-712	4.3818	0	10.903
-711	4.3818	0	10.903
-710	4.3818	0	10.903
-709	4.3818	0	10.903
-708	4.3818	0	10.903
-707	4.3818	0	10.903
-706	4.3818	0	10.903
-705	4.3818	0	10.903
-704	4.3818	0	10.903
-703	4.3818	0	10.903
-702	4.3818	0	10.903
-701	4.3818	0	10.903
-700	4.3818	0	10.903
-699	4.3818	0	10.903
-698	4.3818	0	10.903
-697	4.3818	0	10.903
-696	2.9212	0	10.903
-695	1.4606	0	10.903
-694	1.4606	0	10.903
-693	1.4606	0	10.903
-692	1.4606	0	10.903
-691	1.4606	0	10.903
-690	1.4606	0	10.903
-689	0	0	10.903
-688	0	0	10.903
-687	0	0	10.903
-686	0	0	10.903
-685	0	0	10.903
-684	0	0	8.7224
-683	0	0	8.7224
-682	0	0	8.7224
-681	0	0	8.7224
-680	0	0	8.7224
-679	0	0	8.7224
-678	0	0	8.7224
-677	0	0	8.7224
-676	0	0	8.7224
-675	0	0	8.7224
-674	0	0	8.7224
-673	0	0	8.7224
-672	0	0	8.7224
-671	0	0	6.5418
-670	0	0	6.5418
-669	0	0	6.5418
-668	0	0	6.5418
-667	0	0	6.5418
-666	0	0	6.5418
-665	0	0	6.5418
-664	0	0	6.5418
-663	0	0	6.5418
-662	0	0	6.5418
-661	0	0	6.5418
-660	0	0	6.5418
-659	0	0	6.5418
-658	0	0	6.5418
-657	0	0	6.5418
-656	0	0	6.5418
-655	0	0	6.5418
-654	0	0	6.5418
-653	0	0	6.5418
-652	0	0	6.5418
-651	0	0	6.5418
-650	0	0	6.5418
-649	0	0	6.5418
-648	0	0	6.5418
-647	0	0	6.5418
-646	0	0	6.5418
-645	0	0	6.5418
-644	0	0	6.5418
-643	0	0	6.5418
-642	0	0	6.5418
-641	0	0	6.5418
-640	0	0	6.5418
-639	0	0	6.5418
-638	0	0	6.5418
-637	0	0	6.5418
-636	0	0	6.5418
-635	0	0	6.5418
-634	0	0	6.5418
-633	0	0	6.5418
-632	0	0	6.5418
-631	0	0	6.5418
-630	0	0	6.5418
-629	0	0	6.5418
-628	0	0	6.5418
-627	0	0	6.5418
-626	0	0	6.5418
-625	0	0	6.5418
-624	0	0	6.5418
-623	0	0	6.5418
-622	0	0	6.5418
-621	0	0	6.5418
-620	0	0	6.5418
-619	0	0	6.5418
-618	0	0	6.5418
-617	0	0	6.5418
-616	0	0	6.5418
-615	0	0	6.5418
-614	0	0	6.5418
-613	0	0	6.5418
-612	0	0	6.5418
-611	0	0	6.5418
-610	0	0	6.5418
-609	0	0	4.3612
-608	0	0	4.3612
-607	0	0	4.3612
-606	0	0	4.3612
-605	0	0	4.3612
-604	0	0	4.3612
-603	0	0	4.3612
-602	0	0	4.3612
-601	0	0	4.3612
-600	0	0	4.3612
-599	0	0	4.3612
-598	0	0	4.3612
-597	0	0	4.3612
-596	0	0	4.3612
-595	0	0	4.3612
-594	0	0	4.3612
-593	0	0	4.3612
-592	0	0	4.3612
-591	0	0	4.3612
-590	0	0	4.3612
-589	0	0	4.3612
-588	0	0	4.3612
-587	0	0	4.3612
-586	0	0	4.3612
-585	0	0	4.3612
-584	0	0	6.5418
-583	0	0	6.5418
-582	0	0	6.5418
-581	0	0	6.5418
-580	0	0	6.5418
-579	0	0	6.5418
-578	0	0	6.5418
-577	0	0	6.5418
-576	0	0	6.5418
-575	0	0	6.5418
-574	0	0	6.5418
-573	0	0	6.5418
-572	0	0	6.5418
-571	0	0	6.5418
-570	0	0	6.5418
-569	0	0	6.5418
-568	0	0	6.5418
-567	0	0	6.5418
-566	0	0	6.5418
-565	0	0	6.5418
-564	0	0	6.5418
-563	0	0	6.5418
-562	0	0	6.5418
-561	0	0	6.5418
-560	0	0	6.5418
-559	0	0	6.5418
-558	0	0	6.5418
-557	0	0	6.5418
-556	0	0	6.5418
-555	0	0	6.5418
-554	0	0	6.5418
-553	0	0	6.5418
-552	0	0	6.5418
-551	0	0	6.5418
-550	0	0	6.5418
-549	0	0	6.5418
-548	0	0	6.5418
-547	0	0	6.5418
-546	0	0	6.5418
-545	0	0	6.5418
-544	0	0	6.5418
-543	0	0	6.5418
-542	0	0	6.5418
-541	0	0	6.5418
-540	0	0	6.5418
-539	0	0	6.5418
-538	0	0	6.5418
-537	0	0	6.5418
-536	0	0	6.5418
-535	0	0	6.5418
-534	0	0	6.5418
-533	0	0	6.5418
-532	0	0	6.5418
-531	0	0	6.5418
-530	0	0	6.5418
-529	0	0	6.5418
-528	0	0	6.5418
-527	0	0	6.5418
-526	0	0	6.5418
-525	0	0	6.5418
-524	0	0	6.5418
-523	0	0	6.5418
-522	0	0	6.5418
-521	0	0	6.5418
-520	0	0	6.5418
-519	0	0	6.5418
-518	0	0	6.5418
-517	0	0	6.5418
-516	0	0	6.5418
-515	0	0	6.5418
-514	0	0	6.5418
-513	0	0	6.5418
-512	0	0	6.5418
-511	0	0	6.5418
-510	0	0	6.5418
-509	0	0	6.5418
-508	0	0	6.5418
-507	0	0	6.5418
-506	0	0	6.5418
-505	0	0	6.5418
-504	0	0	6.5418
-503	0	0	6.5418
-502	0	0	6.5418
-501	0	0	6.5418
-500	0	0	6.5418
-499	0	0	6.5418
-498	0	0	6.5418
-497	0	0	6.5418
-496	0	0	6.5418
-495	0	0	6.5418
-494	0	0	6.5418
-493	0	0	6.5418
-492	0	0	6.5418
-491	0	0	6.5418
-490	0	0	6.5418
-489	0	0	6.5418
-488	0	0	6.5418
-487	0	0	6.5418
-486	0	0	6.5418
-485	0	0	6.5418
-484	0	0	6.5418
-483	0	0	6.5418
-482	0	0	6.5418
-481	0	0	6.5418
-480	0	0	6.5418
-479	0	0	6.5418
-478	0	0	6.5418
-477	0	0	6.5418
-476	0	0	6.5418
-475	0	0	6.5418
-474	0	0	6.5418
-473	0	0	6.5418
-472	0	0	6.5418
-471	0	0	6.5418
-470	0	0	6.5418
-469	0	0	6.5418
-468	0	0	6.5418
-467	0	0	6.5418
-466	0	0	6.5418
-465	0	0	6.5418
-464	0	0	6.5418
-463	0	0	6.5418
-462	0	0	6.5418
-461	0	0	6.5418
-460	0	0	6.5418
-459	0	0	6.5418
-458	0	0	6.5418
-457	0	0	6.5418
-456	0	0	6.5418
-455	0	0	6.5418
-454	0	0	6.5418
-453	0	0	6.5418
-452	0	0	6.5418
-451	0	0	6.5418
-450	0	0	6.5418
-449	0	0	6.5418
-448	0	0	6.5418
-447	0	0	6.5418
-446	0	0	6.5418
-445	0	0	6.5418
-444	0	0	6.5418
-443	0	0	6.5418
-442	0	0	6.5418
-441	0	0	6.5418
-440	0	0	6.5418
-439	0	0	6.5418
-438	0	0	6.5418
-437	0	0	6.5418
-436	0	0	6.5418
-435	0	0	6.5418
-434	1.4606	0	6.5418
-433	1.4606	0	6.5418
-432	1.4606	0	6.5418
-431	1.4606	0	6.5418
-430	1.4606	0	6.5418
-429	1.4606	0	4.3612
-428	1.4606	0	4.3612
-427	2.9212	0	4.3612
-426	2.9212	0	4.3612
-425	2.9212	0	4.3612
-424	2.9212	0	4.3612
-423	2.9212	0	4.3612
-422	2.9212	0	4.3612
-421	2.9212	0	6.5418
-420	2.9212	0	6.5418
-419	2.9212	0	6.5418
-418	2.9212	0	6.5418
-417	2.9212	0	6.5418
-416	2.9212	0	6.5418
-415	2.9212	4.7344	10.903
-414	2.9212	4.7344	10.903
-413	2.9212	4.7344	10.903
-412	2.9212	4.7344	10.903
-411	2.9212	4.7344	10.903
-410	2.9212	4.7344	10.903
-409	2.9212	7.1016	8.7224
-408	2.9212	7.1016	8.7224
-407	2.9212	7.1016	8.7224
-406	2.9212	7.1016	8.7224
-405	2.9212	7.1016	8.7224
-404	2.9212	7.1016	8.7224
-403	2.9212	7.1016	8.7224
-402	2.9212	9.4688	10.903
-401	2.9212	9.4688	10.903
-400	2.9212	9.4688	10.903
-399	2.9212	9.4688	10.903
-398	2.9212	9.4688	10.903
-397	2.9212	9.4688	10.903
-396	2.9212	9.4688	10.903
-395	2.9212	9.4688	10.903
-394	2.9212	9.4688	10.903
-393	2.9212	9.4688	10.903
-392	2.9212	9.4688	10.903
-391	2.9212	9.4688	10.903
-390	4.3818	9.4688	10.903
-389	4.3818	9.4688	10.903
-388	4.3818	9.4688	10.903
-387	4.3818	9.4688	10.903
-386	4.3818	9.4688	10.903
-385	4.3818	9.4688	10.903
-384	4.3818	9.4688	10.903
-383	4.3818	9.4688	10.903
-382	4.3818	9.4688	10.903
-381	4.3818	9.4688	10.903
-380	4.3818	9.4688	10.903
-379	5.8424	14.203	10.903
-378	7.303	14.203	11.993
-377	7.303	14.203	11.993
-376	7.303	14.203	11.993
-375	7.303	14.203	11.993
-374	7.303	14.203	11.993
-373	7.303	14.203	11.993
-372	7.303	14.203	11.993
-371	7.303	14.203	11.993
-370	7.303	14.203	14.174
-369	7.303	14.203	14.174
-368	7.303	14.203	14.174
-367	7.303	14.203	14.174
-366	7.303	14.203	14.174
-365	8.7636	14.203	16.354
-364	8.7636	14.203	16.354
-363	8.7636	14.203	16.354
-362	8.7636	14.203	16.354
-361	8.7636	14.203	16.354
-360	8.7636	14.203	16.354
-359	8.7636	14.203	16.354
-358	8.7636	14.203	16.354
-357	8.7636	14.203	16.354
-356	8.7636	14.203	16.354
-355	8.7636	14.203	16.354
-354	10.224	18.938	18.535
-353	11.685	26.039	20.716
-352	11.685	26.039	20.716
-351	11.685	26.039	20.716
-350	11.685	26.039	20.716
-349	11.685	26.039	20.716
-348	11.685	26.039	20.716
-347	11.685	26.039	20.716
-346	11.685	26.039	20.716
-345	11.685	26.039	20.716
-344	11.685	26.039	20.716
-343	11.685	26.039	20.716
-342	11.685	26.039	20.716
-341	11.685	26.039	20.716
-340	11.685	26.039	22.896
-339	13.145	28.406	25.077
-338	13.145	28.406	25.077
-337	13.145	28.406	25.077
-336	13.145	28.406	25.077
-335	13.145	28.406	25.077
-334	14.606	28.406	27.257
-333	14.606	28.406	27.257
-332	14.606	28.406	27.257
-331	14.606	28.406	27.257
-330	14.606	28.406	27.257
-329	16.067	28.406	27.257
-328	16.067	28.406	27.257
-327	16.067	33.141	27.257
-326	16.067	33.141	27.257
-325	16.067	33.141	27.257
-324	16.067	33.141	27.257
-323	16.067	33.141	27.257
-322	16.067	33.141	27.257
-321	16.067	33.141	33.799
-320	17.527	35.508	33.799
-319	17.527	35.508	33.799
-318	17.527	35.508	33.799
-317	17.527	35.508	33.799
-316	17.527	35.508	33.799
-315	17.527	37.875	33.799
-314	17.527	37.875	33.799
-313	17.527	37.875	33.799
-312	17.527	37.875	33.799
-311	17.527	37.875	33.799
-310	17.527	37.875	33.799
-309	17.527	40.242	33.799
-308	17.527	40.242	33.799
-307	17.527	40.242	33.799
-306	17.527	40.242	33.799
-305	17.527	40.242	33.799
-304	17.527	44.977	38.16
-303	18.988	44.977	40.341
-302	18.988	44.977	40.341
-301	18.988	44.977	40.341
-300	18.988	44.977	40.341
-299	18.988	44.977	40.341
-298	18.988	44.977	40.341
-297	18.988	44.977	40.341
-296	18.988	44.977	40.341
-295	18.988	44.977	42.522
-294	18.988	44.977	42.522
-293	18.988	44.977	42.522
-292	18.988	44.977	42.522
-291	18.988	44.977	42.522
-290	18.988	44.977	44.702
-289	18.988	44.977	46.883
-288	18.988	44.977	46.883
-287	18.988	44.977	46.883
-286	18.988	44.977	46.883
-285	18.988	44.977	46.883
-284	18.988	44.977	46.883
-283	18.988	44.977	46.883
-282	18.988	44.977	46.883
-281	18.988	44.977	46.883
-280	18.988	44.977	46.883
-279	20.448	47.344	46.883
-278	20.448	49.711	49.063
-277	23.37	49.711	55.605
-276	23.37	49.711	55.605
-275	23.37	49.711	55.605
-274	23.37	49.711	55.605
-273	23.37	49.711	55.605
-272	23.37	49.711	55.605
-271	27.751	52.078	59.966
-270	27.751	54.446	59.966
-269	27.751	54.446	59.966
-268	27.751	54.446	59.966
-267	27.751	54.446	59.966
-266	27.751	54.446	59.966
-265	35.054	63.914	64.328
-264	37.976	68.649	66.508
-263	37.976	68.649	66.508
-262	37.976	68.649	66.508
-261	37.976	68.649	66.508
-260	37.976	68.649	66.508
-259	40.897	71.016	77.411
-258	40.897	71.016	77.411
-257	40.897	71.016	77.411
-256	40.897	71.016	77.411
-255	40.897	71.016	77.411
-254	42.357	71.016	77.411
-253	42.357	73.383	77.411
-252	45.279	78.118	79.592
-251	45.279	78.118	79.592
-250	45.279	78.118	79.592
-249	45.279	78.118	79.592
-248	45.279	78.118	79.592
-247	45.279	78.118	79.592
-246	48.2	78.118	83.953
-245	48.2	78.118	83.953
-244	48.2	78.118	83.953
-243	48.2	78.118	83.953
-242	48.2	78.118	83.953
-241	48.2	78.118	83.953
-240	49.66	82.852	86.134
-239	52.582	89.954	99.217
-238	52.582	89.954	99.217
-237	52.582	89.954	99.217
-236	52.582	89.954	99.217
-235	52.582	89.954	99.217
-234	54.042	97.055	112.3
-233	54.042	97.055	112.3
-232	54.042	97.055	112.3
-231	54.042	97.055	112.3
-230	54.042	97.055	112.3
-229	61.345	101.79	125.38
-228	64.266	106.52	135.2
-227	67.188	111.26	146.1
-226	67.188	111.26	146.1
-225	67.188	111.26	146.1
-224	67.188	111.26	146.1
-223	67.188	111.26	146.1
-222	67.188	111.26	146.1
-221	73.03	115.99	159.18
-220	75.951	130.2	174.45
-219	75.951	130.2	174.45
-218	75.951	130.2	174.45
-217	75.951	130.2	174.45
-216	75.951	130.2	174.45
-215	78.872	146.77	187.53
-214	80.333	149.13	194.07
-213	80.333	149.13	194.07
-212	80.333	149.13	194.07
-211	80.333	149.13	194.07
-210	80.333	149.13	194.07
-209	83.254	153.87	200.62
-208	83.254	153.87	200.62
-207	83.254	153.87	200.62
-206	83.254	153.87	200.62
-205	83.254	153.87	200.62
-204	84.715	156.24	211.52
-203	92.018	158.6	211.52
-202	93.478	165.7	222.42
-201	93.478	165.7	222.42
-200	93.478	165.7	222.42
-199	93.478	165.7	222.42
-198	93.478	165.7	222.42
-197	93.478	165.7	222.42
-196	103.7	179.91	228.96
-195	103.7	184.64	233.32
-194	103.7	184.64	233.32
-193	103.7	184.64	233.32
-192	103.7	184.64	233.32
-191	103.7	184.64	233.32
-190	108.08	194.11	252.95
-189	112.47	201.21	259.49
-188	112.47	201.21	259.49
-187	112.47	201.21	259.49
-186	112.47	201.21	259.49
-185	112.47	201.21	259.49
-184	116.85	201.21	263.85
-183	116.85	201.21	263.85
-182	116.85	201.21	263.85
-181	116.85	201.21	263.85
-180	116.85	201.21	263.85
-179	131.45	208.31	296.56
-178	135.84	220.15	307.46
-177	138.76	220.15	311.83
-176	138.76	220.15	311.83
-175	138.76	220.15	311.83
-174	138.76	220.15	311.83
-173	138.76	220.15	311.83
-172	138.76	220.15	311.83
-171	140.22	235.54	327.09
-170	143.14	247.37	342.35
-169	143.14	247.37	342.35
-168	143.14	247.37	342.35
-167	143.14	247.37	342.35
-166	143.14	247.37	342.35
-165	141.68	245.01	342.35
-164	144.6	242.64	342.35
-163	144.6	242.64	342.35
-162	144.6	242.64	342.35
-161	144.6	242.64	342.35
-160	144.6	242.64	342.35
-159	143.14	245.01	351.08
-158	143.14	245.01	351.08
-157	143.14	245.01	351.08
-156	143.14	245.01	351.08
-155	143.14	245.01	351.08
-154	159.21	266.31	368.52
-153	159.21	280.51	379.42
-152	159.21	282.88	379.42
-151	159.21	282.88	379.42
-150	159.21	282.88	379.42
-149	159.21	282.88	379.42
-148	159.21	282.88	379.42
-147	159.21	282.88	379.42
-146	159.21	289.98	377.24
-145	167.97	294.72	381.61
-144	167.97	294.72	381.61
-143	167.97	294.72	381.61
-142	167.97	294.72	381.61
-141	167.97	294.72	381.61
-140	162.13	297.08	368.52
-139	163.59	294.72	368.52
-138	163.59	294.72	368.52
-137	163.59	294.72	368.52
-136	163.59	294.72	368.52
-135	163.59	294.72	368.52
-134	162.13	285.25	370.7
-133	162.13	285.25	370.7
-132	162.13	285.25	370.7
-131	162.13	285.25	370.7
-130	162.13	285.25	370.7
-129	163.59	293.53	385.97
-128	163.59	291.17	396.87
-127	160.67	286.43	394.69
-126	160.67	286.43	394.69
-125	160.67	286.43	394.69
-124	160.67	286.43	394.69
-123	160.67	286.43	394.69
-122	160.67	286.43	394.69
-121	148.98	274.6	383.79
-120	150.44	280.51	392.51
-119	150.44	280.51	392.51
-118	150.44	280.51	392.51
-117	150.44	280.51	392.51
-116	150.44	280.51	392.51
-115	148.98	268.68	392.51
-114	148.98	266.31	385.97
-113	148.98	266.31	385.97
-112	148.98	266.31	385.97
-111	148.98	266.31	385.97
-110	148.98	266.31	385.97
-109	150.44	269.86	379.42
-108	150.44	269.86	379.42
-107	150.44	269.86	379.42
-106	150.44	269.86	379.42
-105	150.44	269.86	379.42
-104	151.9	276.96	369.61
-103	150.44	272.23	370.7
-102	148.98	269.86	359.8
-101	148.98	269.86	359.8
-100	148.98	269.86	359.8
-99	148.98	269.86	359.8
-98	148.98	269.86	359.8
-97	148.98	269.86	359.8
-96	150.44	267.49	359.8
-95	150.44	248.56	355.44
-94	150.44	248.56	355.44
-93	150.44	248.56	355.44
-92	150.44	248.56	355.44
-91	150.44	248.56	355.44
-90	147.52	248.56	353.26
-89	144.6	248.56	348.9
-88	144.6	248.56	348.9
-87	144.6	248.56	348.9
-86	144.6	248.56	348.9
-85	144.6	248.56	348.9
-84	147.52	246.19	337.99
-83	147.52	246.19	337.99
-82	147.52	246.19	337.99
-81	147.52	246.19	337.99
-80	147.52	246.19	337.99
-79	141.68	234.35	324.91
-78	135.84	227.25	314.01
-77	132.91	222.52	311.83
-76	132.91	222.52	311.83
-75	132.91	222.52	311.83
-74	132.91	222.52	311.83
-73	132.91	222.52	311.83
-72	132.91	222.52	311.83
-71	129.99	220.15	314.01
-70	128.53	213.05	316.19
-69	128.53	213.05	316.19
-68	128.53	213.05	316.19
-67	128.53	213.05	316.19
-66	128.53	213.05	316.19
-65	125.61	210.68	314.01
-64	122.69	210.68	316.19
-63	122.69	210.68	316.19
-62	122.69	210.68	316.19
-61	122.69	210.68	316.19
-60	122.69	210.68	316.19
-59	122.69	213.05	318.37
-58	122.69	213.05	318.37
-57	122.69	213.05	318.37
-56	122.69	213.05	318.37
-55	122.69	213.05	318.37
-54	113.93	210.68	320.55
-53	113.93	207.13	322.73
-52	112.47	207.13	324.91
-51	112.47	207.13	324.91
-50	112.47	207.13	324.91
-49	112.47	207.13	324.91
-48	112.47	207.13	324.91
-47	112.47	207.13	324.91
-46	113.93	203.58	322.73
-45	109.55	201.21	318.37
-44	109.55	201.21	318.37
-43	109.55	201.21	318.37
-42	109.55	201.21	318.37
-41	109.55	201.21	318.37
-40	109.55	201.21	320.55
-39	109.55	201.21	322.73
-38	109.55	201.21	322.73
-37	109.55	201.21	322.73
-36	109.55	201.21	322.73
-35	109.55	201.21	322.73
-34	111.01	203.58	322.73
-33	111.01	203.58	322.73
-32	111.01	203.58	322.73
-31	111.01	203.58	322.73
-30	111.01	203.58	322.73
-29	109.55	196.48	329.27
-28	109.55	191.74	328.18
-27	111.01	196.48	330.36
-26	111.01	196.48	330.36
-25	111.01	196.48	330.36
-24	111.01	196.48	330.36
-23	111.01	196.48	330.36
-22	111.01	196.48	330.36
-21	111.01	196.48	328.18
-20	108.08	198.84	330.36
-19	108.08	198.84	330.36
-18	108.08	198.84	330.36
-17	108.08	198.84	330.36
-16	108.08	198.84	330.36
-15	108.08	194.11	326
-14	106.62	194.11	326
-13	106.62	194.11	326
-12	106.62	194.11	326
-11	106.62	194.11	326
-10	106.62	194.11	326
-9	103.7	191.74	319.46
-8	103.7	191.74	319.46
-7	103.7	191.74	319.46
-6	103.7	191.74	319.46
-5	103.7	191.74	319.46
-4	103.7	191.74	317.28
-3	105.16	191.74	312.92
-2	105.16	191.74	310.74
-1	105.16	191.74	310.74
0	105.16	191.74	310.74
1	105.16	191.74	310.74
2	105.16	191.74	310.74
3	105.16	191.74	310.74
4	102.24	189.38	297.65
5	103.7	190.56	299.83
6	103.7	190.56	299.83
7	103.7	190.56	299.83
8	103.7	190.56	299.83
9	103.7	190.56	299.83
10	102.24	190.56	291.11
11	103.7	195.29	288.93
12	103.7	195.29	288.93
13	103.7	195.29	288.93
14	103.7	195.29	288.93
15	103.7	195.29	288.93
16	105.16	196.48	288.93
17	105.16	196.48	288.93
18	105.16	196.48	288.93
19	105.16	196.48	288.93
20	105.16	196.48	288.93
21	103.7	185.83	275.85
22	103.7	185.83	266.03
23	103.7	183.46	272.58
24	103.7	183.46	272.58
25	103.7	183.46	272.58
26	103.7	183.46	272.58
27	103.7	183.46	272.58
28	103.7	183.46	272.58
29	103.7	181.09	274.76
30	102.24	178.72	266.03
31	102.24	178.72	266.03
32	102.24	178.72	266.03
33	102.24	178.72	266.03
34	102.24	178.72	266.03
35	102.24	183.46	266.03
36	102.24	185.83	266.03
37	102.24	185.83	266.03
38	102.24	185.83	266.03
39	102.24	185.83	266.03
40	102.24	185.83	266.03
41	102.24	185.83	263.85
42	102.24	185.83	263.85
43	102.24	185.83	263.85
44	102.24	185.83	263.85
45	102.24	185.83	263.85
46	99.321	181.09	251.86
47	96.4	183.46	240.96
48	96.4	183.46	238.78
49	96.4	183.46	238.78
50	96.4	183.46	238.78
51	96.4	183.46	238.78
52	96.4	183.46	238.78
53	96.4	183.46	238.78
54	99.321	183.46	240.96
55	99.321	178.72	232.23
56	99.321	178.72	232.23
57	99.321	178.72	232.23
58	99.321	178.72	232.23
59	99.321	178.72	232.23
60	99.321	178.72	232.23
61	99.321	178.72	238.78
62	99.321	178.72	238.78
63	99.321	178.72	238.78
64	99.321	178.72	238.78
65	99.321	178.72	238.78
66	99.321	178.72	247.5
67	99.321	178.72	247.5
68	99.321	178.72	247.5
69	99.321	178.72	247.5
70	99.321	178.72	247.5
71	99.321	183.46	243.14
72	99.321	183.46	243.14
73	99.321	183.46	238.78
74	99.321	183.46	238.78
75	99.321	183.46	238.78
76	99.321	183.46	238.78
77	99.321	183.46	238.78
78	99.321	183.46	238.78
79	99.321	183.46	237.69
80	99.321	183.46	235.5
81	99.321	183.46	235.5
82	99.321	183.46	235.5
83	99.321	183.46	235.5
84	99.321	183.46	235.5
85	99.321	171.62	235.5
86	97.86	166.89	233.32
87	97.86	166.89	233.32
88	97.86	166.89	233.32
89	97.86	166.89	233.32
90	97.86	166.89	233.32
91	94.939	159.79	231.14
92	94.939	159.79	231.14
93	94.939	159.79	231.14
94	94.939	159.79	231.14
95	94.939	159.79	231.14
96	94.939	157.42	239.87
97	93.478	153.87	244.23
98	92.018	151.5	235.5
99	92.018	151.5	235.5
100	92.018	151.5	235.5
101	92.018	151.5	235.5
102	92.018	151.5	235.5
103	92.018	151.5	235.5
104	89.097	137.3	224.6
105	90.557	139.66	226.78
106	90.557	139.66	226.78
107	90.557	139.66	226.78
108	90.557	139.66	226.78
109	90.557	139.66	226.78
110	89.097	125.46	220.24
111	84.715	115.99	211.52
112	84.715	115.99	211.52
113	84.715	115.99	211.52
114	84.715	115.99	211.52
115	84.715	115.99	211.52
116	78.872	113.63	200.62
117	78.872	113.63	200.62
118	78.872	113.63	200.62
119	78.872	113.63	200.62
120	78.872	113.63	200.62
121	75.951	115.99	200.62
122	73.03	113.63	199.52
123	73.03	108.89	192.98
124	73.03	108.89	192.98
125	73.03	108.89	192.98
126	73.03	108.89	192.98
127	73.03	108.89	192.98
128	73.03	108.89	192.98
129	70.109	108.89	188.62
130	67.188	104.16	177.72
131	67.188	104.16	177.72
132	67.188	104.16	177.72
133	67.188	104.16	177.72
134	67.188	104.16	177.72
135	67.188	99.422	177.72
136	67.188	99.422	175.54
137	67.188	99.422	175.54
138	67.188	99.422	175.54
139	67.188	99.422	175.54
140	67.188	99.422	175.54
141	65.727	99.422	175.54
142	65.727	99.422	175.54
143	65.727	99.422	175.54
144	65.727	99.422	175.54
145	65.727	99.422	175.54
146	54.042	89.954	162.45
147	52.582	89.954	158.09
148	49.66	89.954	155.91
149	49.66	89.954	155.91
150	49.66	89.954	155.91
151	49.66	89.954	155.91
152	49.66	89.954	155.91
153	49.66	89.954	155.91
154	49.66	89.954	155.91
155	46.739	87.586	147.19
156	46.739	87.586	147.19
157	46.739	87.586	147.19
158	46.739	87.586	147.19
159	46.739	87.586	147.19
160	46.739	87.586	149.37
161	46.739	92.321	145.01
162	46.739	92.321	145.01
163	46.739	92.321	145.01
164	46.739	92.321	145.01
165	46.739	92.321	145.01
166	46.739	94.688	145.01
167	46.739	94.688	145.01
168	46.739	94.688	145.01
169	46.739	94.688	145.01
170	46.739	94.688	145.01
171	42.357	94.688	138.47
172	42.357	94.688	136.29
173	42.357	97.055	138.47
174	42.357	97.055	138.47
175	42.357	97.055	138.47
176	42.357	97.055	138.47
177	42.357	97.055	138.47
178	42.357	97.055	138.47
179	42.357	98.239	142.83
180	42.357	98.239	138.47
181	42.357	98.239	138.47
182	42.357	98.239	138.47
183	42.357	98.239	138.47
184	42.357	98.239	138.47
185	42.357	98.239	136.29
186	42.357	95.872	136.29
187	42.357	95.872	136.29
188	42.357	95.872	136.29
189	42.357	95.872	136.29
190	42.357	95.872	136.29
191	42.357	95.872	134.11
192	42.357	95.872	134.11
193	42.357	95.872	134.11
194	42.357	95.872	134.11
195	42.357	95.872	134.11
196	40.897	98.239	134.11
197	40.897	93.504	129.75
198	40.897	91.137	127.57
199	40.897	91.137	127.57
200	40.897	91.137	127.57
201	40.897	91.137	127.57
202	40.897	91.137	127.57
203	40.897	91.137	127.57
204	40.897	91.137	124.29
205	42.357	89.954	126.47
206	42.357	89.954	126.47
207	42.357	89.954	126.47
208	42.357	89.954	126.47
209	42.357	89.954	126.47
210	43.818	89.954	126.47
211	43.818	89.954	126.47
212	43.818	89.954	126.47
213	43.818	89.954	126.47
214	43.818	89.954	126.47
215	43.818	89.954	126.47
216	42.357	87.586	122.11
217	42.357	87.586	122.11
218	42.357	87.586	122.11
219	42.357	87.586	122.11
220	42.357	87.586	122.11
221	43.818	95.872	119.93
222	48.2	95.872	119.93
223	48.2	99.422	119.93
224	48.2	99.422	119.93
225	48.2	99.422	119.93
226	48.2	99.422	119.93
227	48.2	99.422	119.93
228	48.2	99.422	119.93
229	48.2	102.97	119.93
230	48.2	102.97	119.93
231	48.2	102.97	119.93
232	48.2	102.97	119.93
233	48.2	102.97	119.93
234	48.2	102.97	119.93
235	49.66	102.97	122.11
236	49.66	102.97	122.11
237	49.66	102.97	122.11
238	49.66	102.97	122.11
239	49.66	102.97	122.11
240	49.66	102.97	122.11
241	49.66	104.16	119.93
242	49.66	104.16	119.93
243	49.66	104.16	119.93
244	49.66	104.16	119.93
245	49.66	104.16	119.93
246	49.66	101.79	113.39
247	46.739	101.79	113.39
248	46.739	99.422	115.57
249	46.739	99.422	115.57
250	46.739	99.422	115.57
251	46.739	99.422	115.57
252	46.739	99.422	115.57
253	46.739	99.422	115.57
254	46.739	99.422	115.57
255	45.279	101.79	117.75
256	45.279	101.79	117.75
257	45.279	101.79	117.75
258	45.279	101.79	117.75
259	45.279	101.79	117.75
260	45.279	101.79	117.75
261	43.818	99.422	119.93
262	43.818	99.422	119.93
263	43.818	99.422	119.93
264	43.818	99.422	119.93
265	43.818	99.422	119.93
266	43.818	104.16	119.93
267	43.818	104.16	119.93
268	43.818	104.16	119.93
269	43.818	104.16	119.93
270	43.818	104.16	119.93
271	43.818	99.422	123.2
272	43.818	104.16	124.29
273	46.739	104.16	122.11
274	46.739	104.16	122.11
275	46.739	104.16	122.11
276	46.739	104.16	122.11
277	46.739	104.16	122.11
278	46.739	104.16	122.11
279	46.739	104.16	119.93
280	45.279	104.16	119.93
281	45.279	104.16	119.93
282	45.279	104.16	119.93
283	45.279	104.16	119.93
284	45.279	104.16	119.93
285	48.2	104.16	119.93
286	48.2	104.16	126.47
287	48.2	104.16	126.47
288	48.2	104.16	126.47
289	48.2	104.16	126.47
290	48.2	104.16	126.47
291	46.739	104.16	125.38
292	46.739	104.16	125.38
293	46.739	104.16	125.38
294	46.739	104.16	125.38
295	46.739	104.16	125.38
296	49.66	97.055	125.38
297	48.2	93.504	127.57
298	46.739	98.239	125.38
299	46.739	98.239	125.38
300	46.739	98.239	125.38
301	46.739	98.239	125.38
302	46.739	98.239	125.38
303	46.739	98.239	125.38
304	46.739	99.422	125.38
305	46.739	99.422	129.75
306	46.739	99.422	129.75
307	46.739	99.422	129.75
308	46.739	99.422	129.75
309	46.739	99.422	129.75
310	45.279	104.16	127.57
311	43.818	104.16	131.93
312	43.818	104.16	131.93
313	43.818	104.16	131.93
314	43.818	104.16	131.93
315	43.818	104.16	131.93
316	43.818	106.52	129.75
317	43.818	106.52	129.75
318	43.818	106.52	129.75
319	43.818	106.52	129.75
320	43.818	106.52	129.75
321	42.357	104.16	127.57
322	42.357	99.422	134.11
323	42.357	99.422	136.29
324	42.357	99.422	136.29
325	42.357	99.422	136.29
326	42.357	99.422	136.29
327	42.357	99.422	136.29
328	42.357	99.422	136.29
329	40.897	101.79	134.11
330	43.818	104.16	133.02
331	43.818	104.16	133.02
332	43.818	104.16	133.02
333	43.818	104.16	133.02
334	43.818	104.16	133.02
335	45.279	101.79	130.84
336	43.818	99.422	124.29
337	43.818	99.422	124.29
338	43.818	99.422	124.29
339	43.818	99.422	124.29
340	43.818	99.422	124.29
341	42.357	97.055	124.29
342	42.357	97.055	124.29
343	42.357	97.055	124.29
344	42.357	97.055	124.29
345	42.357	97.055	124.29
346	40.897	98.239	124.29
347	40.897	98.239	123.2
348	40.897	95.872	123.2
349	40.897	95.872	123.2
350	40.897	95.872	123.2
351	40.897	95.872	123.2
352	40.897	95.872	123.2
353	40.897	95.872	123.2
354	40.897	100.61	118.84
355	43.818	101.79	112.3
356	43.818	101.79	112.3
357	43.818	101.79	112.3
358	43.818	101.79	112.3
359	43.818	101.79	112.3
360	43.818	101.79	110.12
361	45.279	101.79	105.76
362	45.279	101.79	105.76
363	45.279	101.79	105.76
364	45.279	101.79	105.76
365	45.279	101.79	105.76
366	45.279	98.239	99.217
367	45.279	98.239	99.217
368	45.279	98.239	99.217
369	45.279	98.239	99.217
370	45.279	98.239	99.217
371	46.739	95.872	97.037
372	46.739	93.504	94.856
373	46.739	92.321	94.856
374	46.739	92.321	94.856
375	46.739	92.321	94.856
376	46.739	92.321	94.856
377	46.739	92.321	94.856
378	46.739	92.321	94.856
379	48.2	91.137	94.856
380	48.2	86.403	92.676
381	48.2	86.403	92.676
382	48.2	86.403	92.676
383	48.2	86.403	92.676
384	48.2	86.403	92.676
385	48.2	86.403	94.856
386	48.2	86.403	90.495
387	48.2	86.403	90.495
388	48.2	86.403	90.495
389	48.2	86.403	90.495
390	48.2	86.403	90.495
391	48.2	86.403	94.856
392	48.2	86.403	94.856
393	48.2	86.403	94.856
394	48.2	86.403	94.856
395	48.2	86.403	94.856
396	49.66	84.036	91.585
397	49.66	84.036	90.495
398	49.66	86.403	90.495
399	49.66	86.403	90.495
400	49.66	86.403	90.495
401	49.66	86.403	90.495
402	49.66	86.403	90.495
403	49.66	86.403	90.495
404	51.121	86.403	90.495
405	51.121	84.036	92.675
406	51.121	84.036	92.675
407	51.121	84.036	92.675
408	51.121	84.036	92.675
409	51.121	84.036	92.675
410	51.121	81.668	92.675
411	52.582	81.668	94.856
412	52.582	81.668	94.856
413	52.582	81.668	94.856
414	52.582	81.668	94.856
415	52.582	81.668	94.856
416	54.042	81.668	94.856
417	54.042	81.668	94.856
418	54.042	81.668	94.856
419	54.042	81.668	94.856
420	54.042	81.668	94.856
421	54.042	81.668	97.037
422	51.121	80.485	97.037
423	49.66	79.301	99.217
424	49.66	79.301	99.217
425	49.66	79.301	99.217
426	49.66	79.301	99.217
427	49.66	79.301	99.217
428	49.66	79.301	99.217
429	48.2	74.567	97.037
430	45.279	76.934	97.037
431	45.279	76.934	97.037
432	45.279	76.934	97.037
433	45.279	76.934	97.037
434	45.279	76.934	97.037
435	45.279	76.934	94.856
436	49.66	79.301	92.675
437	49.66	79.301	92.675
438	49.66	79.301	92.675
439	49.66	79.301	92.675
440	49.66	79.301	92.675
441	48.2	76.934	93.766
442	48.2	76.934	93.766
443	48.2	76.934	93.766
444	48.2	76.934	93.766
445	48.2	76.934	93.766
446	45.279	81.668	87.224
447	49.66	81.668	85.043
448	48.2	81.668	82.863
449	48.2	81.668	82.863
450	48.2	81.668	82.863
451	48.2	81.668	82.863
452	48.2	81.668	82.863
453	48.2	81.668	82.863
454	46.739	81.668	86.134
455	45.279	76.934	86.134
456	45.279	76.934	86.134
457	45.279	76.934	86.134
458	45.279	76.934	86.134
459	45.279	76.934	86.134
460	45.279	76.934	86.134
461	43.818	74.567	86.134
462	43.818	74.567	86.134
463	43.818	74.567	86.134
464	43.818	74.567	86.134
465	43.818	74.567	86.134
466	43.818	72.2	83.953
467	43.818	72.2	83.953
468	43.818	72.2	83.953
469	43.818	72.2	83.953
470	43.818	72.2	83.953
471	42.357	72.2	88.314
472	40.897	72.2	91.585
473	40.897	74.567	89.405
474	40.897	74.567	89.405
475	40.897	74.567	89.405
476	40.897	74.567	89.405
477	40.897	74.567	89.405
478	40.897	74.567	89.405
479	40.897	72.2	87.224
480	39.436	72.2	83.953
481	39.436	72.2	83.953
482	39.436	72.2	83.953
483	39.436	72.2	83.953
484	39.436	72.2	83.953
485	40.897	74.567	79.592
486	42.357	72.2	79.592
487	42.357	72.2	79.592
488	42.357	72.2	79.592
489	42.357	72.2	79.592
490	42.357	72.2	79.592
491	42.357	72.2	79.592
492	42.357	72.2	79.592
493	42.357	72.2	79.592
494	42.357	72.2	79.592
495	42.357	72.2	79.592
496	39.436	69.832	73.05
497	37.976	67.465	73.05
498	39.436	69.832	73.05
499	39.436	69.832	73.05
500	39.436	69.832	73.05
501	39.436	69.832	73.05
502	39.436	69.832	73.05
503	39.436	69.832	73.05
504	37.976	69.832	73.05
505	36.515	69.832	73.05
506	36.515	69.832	73.05
507	36.515	69.832	73.05
508	36.515	69.832	73.05
509	36.515	69.832	73.05
510	35.054	67.465	73.05
511	32.133	65.098	68.689
512	32.133	65.098	68.689
513	32.133	65.098	68.689
514	32.133	65.098	68.689
515	32.133	65.098	68.689
516	32.133	65.098	66.508
517	32.133	65.098	66.508
518	32.133	65.098	66.508
519	32.133	65.098	66.508
520	32.133	65.098	66.508
521	36.515	55.629	64.328
522	36.515	53.262	66.508
523	35.054	53.262	66.508
524	35.054	53.262	66.508
525	35.054	53.262	66.508
526	35.054	53.262	66.508
527	35.054	53.262	66.508
528	35.054	53.262	66.508
529	35.054	53.262	66.508
530	36.515	53.262	66.508
531	36.515	53.262	66.508
532	36.515	53.262	66.508
533	36.515	53.262	66.508
534	36.515	53.262	66.508
535	36.515	53.262	64.328
536	35.054	53.262	62.147
537	35.054	53.262	62.147
538	35.054	53.262	62.147
539	35.054	53.262	62.147
540	35.054	53.262	62.147
541	35.054	48.528	62.147
542	35.054	48.528	62.147
543	35.054	48.528	62.147
544	35.054	48.528	62.147
545	35.054	48.528	62.147
546	32.133	46.16	57.786
547	32.133	53.262	55.605
548	32.133	53.262	55.605
549	32.133	53.262	55.605
550	32.133	53.262	55.605
551	32.133	53.262	55.605
552	32.133	53.262	55.605
553	32.133	53.262	55.605
554	32.133	55.629	57.786
555	32.133	55.629	57.786
556	32.133	55.629	57.786
557	32.133	55.629	57.786
558	32.133	55.629	57.786
559	32.133	55.629	57.786
560	32.133	55.629	59.966
561	32.133	55.629	59.966
562	32.133	55.629	59.966
563	32.133	55.629	59.966
564	32.133	55.629	59.966
565	32.133	55.629	59.966
566	33.594	55.629	62.147
567	33.594	55.629	62.147
568	33.594	55.629	62.147
569	33.594	55.629	62.147
570	33.594	55.629	62.147
571	32.133	55.629	62.147
572	32.133	55.629	59.966
573	32.133	50.895	59.966
574	32.133	50.895	59.966
575	32.133	50.895	59.966
576	32.133	50.895	59.966
577	32.133	50.895	59.966
578	32.133	50.895	59.966
579	32.133	47.344	58.876
580	33.594	47.344	58.876
581	33.594	47.344	58.876
582	33.594	47.344	58.876
583	33.594	47.344	58.876
584	33.594	47.344	58.876
585	35.054	44.977	61.057
586	35.054	44.977	63.237
587	35.054	44.977	63.237
588	35.054	44.977	63.237
589	35.054	44.977	63.237
590	35.054	44.977	63.237
591	35.054	44.977	61.057
592	35.054	44.977	61.057
593	35.054	44.977	61.057
594	35.054	44.977	61.057
595	35.054	44.977	61.057
596	35.054	46.16	63.237
597	36.515	43.793	65.418
598	36.515	43.793	65.418
599	36.515	43.793	65.418
600	36.515	43.793	65.418
601	36.515	43.793	65.418
602	36.515	43.793	65.418
603	36.515	43.793	65.418
604	37.976	43.793	65.418
605	37.976	43.793	67.599
606	37.976	43.793	67.599
607	37.976	43.793	67.599
608	37.976	43.793	67.599
609	37.976	43.793	67.599
610	40.897	43.793	69.779
611	40.897	41.426	71.96
612	40.897	41.426	71.96
613	40.897	41.426	71.96
614	40.897	41.426	71.96
615	40.897	41.426	71.96
616	40.897	41.426	76.321
617	40.897	41.426	76.321
618	40.897	41.426	76.321
619	40.897	41.426	76.321
620	40.897	41.426	76.321
621	42.357	39.059	76.321
622	43.818	39.059	71.96
623	45.279	37.875	76.321
624	45.279	37.875	76.321
625	45.279	37.875	76.321
626	45.279	37.875	76.321
627	45.279	37.875	76.321
628	45.279	37.875	76.321
629	43.818	35.508	74.14
630	43.818	37.875	73.05
631	43.818	37.875	73.05
632	43.818	37.875	73.05
633	43.818	37.875	73.05
634	43.818	37.875	73.05
635	43.818	40.242	75.231
636	45.279	40.242	73.05
637	45.279	40.242	73.05
638	45.279	40.242	73.05
639	45.279	40.242	73.05
640	45.279	40.242	73.05
641	43.818	40.242	73.05
642	43.818	40.242	73.05
643	43.818	40.242	73.05
644	43.818	40.242	73.05
645	43.818	40.242	73.05
646	45.279	40.242	77.411
647	46.739	44.977	78.502
648	48.2	47.344	80.682
649	48.2	47.344	80.682
650	48.2	47.344	80.682
651	48.2	47.344	80.682
652	48.2	47.344	80.682
653	48.2	47.344	80.682
654	48.2	47.344	80.682
655	46.739	49.711	82.863
656	46.739	49.711	82.863
657	46.739	49.711	82.863
658	46.739	49.711	82.863
659	46.739	49.711	82.863
660	49.66	49.711	80.682
661	49.66	49.711	80.682
662	49.66	49.711	80.682
663	49.66	49.711	80.682
664	49.66	49.711	80.682
665	49.66	49.711	80.682
666	52.582	55.629	90.495
667	52.582	55.629	90.495
668	52.582	55.629	90.495
669	52.582	55.629	90.495
670	52.582	55.629	90.495
671	52.582	57.996	92.676
672	52.582	57.996	88.314
673	52.582	62.731	90.495
674	52.582	62.731	90.495
675	52.582	62.731	90.495
676	52.582	62.731	90.495
677	52.582	62.731	90.495
678	52.582	62.731	90.495
679	55.503	67.465	92.676
680	54.042	67.465	94.856
681	54.042	67.465	94.856
682	54.042	67.465	94.856
683	54.042	67.465	94.856
684	54.042	67.465	94.856
685	54.042	67.465	97.037
686	54.042	72.2	101.4
687	54.042	72.2	101.4
688	54.042	72.2	101.4
689	54.042	72.2	101.4
690	54.042	72.2	101.4
691	52.582	74.567	97.037
692	52.582	74.567	97.037
693	52.582	74.567	97.037
694	52.582	74.567	97.037
695	52.582	74.567	97.037
696	52.582	76.934	94.856
697	52.582	76.934	94.856
698	51.121	73.383	89.405
699	51.121	73.383	89.405
700	51.121	73.383	89.405
701	51.121	73.383	89.405
702	51.121	73.383	89.405
703	51.121	73.383	89.405
704	51.121	72.2	87.224
705	52.582	76.934	92.675
706	52.582	76.934	92.675
707	52.582	76.934	92.675
708	52.582	76.934	92.675
709	52.582	76.934	92.675
710	51.121	76.934	90.495
711	51.121	76.934	90.495
712	51.121	76.934	90.495
713	51.121	76.934	90.495
714	51.121	76.934	90.495
715	51.121	76.934	90.495
716	51.121	76.934	94.856
717	51.121	76.934	94.856
718	51.121	76.934	94.856
719	51.121	76.934	94.856
720	51.121	76.934	94.856
721	56.963	92.321	105.76
722	55.503	99.422	106.85
723	55.503	99.422	106.85
724	55.503	99.422	106.85
725	55.503	99.422	106.85
726	55.503	99.422	106.85
727	55.503	99.422	106.85
728	55.503	99.422	106.85
729	55.503	101.79	106.85
730	55.503	101.79	106.85
731	55.503	101.79	106.85
732	55.503	101.79	106.85
733	55.503	101.79	106.85
734	55.503	101.79	106.85
735	54.042	101.79	106.85
736	55.503	101.79	106.85
737	55.503	101.79	106.85
738	55.503	101.79	106.85
739	55.503	101.79	106.85
740	55.503	101.79	106.85
741	56.963	104.16	104.67
742	56.963	104.16	104.67
743	56.963	104.16	104.67
744	56.963	104.16	104.67
745	56.963	104.16	104.67
746	52.582	102.97	104.67
747	52.582	102.97	104.67
748	52.582	101.79	104.67
749	52.582	101.79	104.67
750	52.582	101.79	104.67
751	52.582	101.79	104.67
752	52.582	101.79	104.67
753	52.582	101.79	104.67
754	52.582	101.79	104.67
755	51.121	101.79	106.85
756	51.121	101.79	106.85
757	51.121	101.79	106.85
758	51.121	101.79	106.85
759	51.121	101.79	106.85
760	51.121	108.89	109.03
761	51.121	108.89	111.21
762	51.121	108.89	111.21
763	51.121	108.89	111.21
764	51.121	108.89	111.21
765	51.121	108.89	111.21
766	51.121	111.26	111.21
767	51.121	111.26	111.21
768	51.121	111.26	111.21
769	51.121	111.26	111.21
770	51.121	111.26	111.21
771	51.121	115.99	111.21
772	51.121	115.99	111.21
773	51.121	119.54	117.75
774	51.121	119.54	117.75
775	51.121	119.54	117.75
776	51.121	119.54	117.75
777	51.121	119.54	117.75
778	51.121	119.54	117.75
779	52.582	121.91	119.93
780	52.582	121.91	121.02
781	52.582	121.91	121.02
782	52.582	121.91	121.02
783	52.582	121.91	121.02
784	52.582	121.91	121.02
785	54.042	126.65	123.2
786	54.042	126.65	131.93
787	54.042	126.65	131.93
788	54.042	126.65	131.93
789	54.042	126.65	131.93
790	54.042	126.65	131.93
791	54.042	129.01	133.02
792	54.042	129.01	133.02
793	54.042	129.01	133.02
794	54.042	129.01	133.02
795	54.042	129.01	133.02
796	55.503	126.65	135.2
797	55.503	124.28	134.11
798	56.963	129.01	138.47
799	56.963	129.01	138.47
800	56.963	129.01	138.47
801	56.963	129.01	138.47
802	56.963	129.01	138.47
803	56.963	129.01	138.47
804	58.424	129.01	138.47
805	58.424	129.01	136.29
806	58.424	129.01	136.29
807	58.424	129.01	136.29
808	58.424	129.01	136.29
809	58.424	129.01	136.29
810	58.424	133.75	136.29
811	56.963	138.48	134.11
812	56.963	138.48	134.11
813	56.963	138.48	134.11
814	56.963	138.48	134.11
815	56.963	138.48	134.11
816	56.963	134.93	136.29
817	56.963	134.93	136.29
818	56.963	134.93	136.29
819	56.963	134.93	136.29
820	56.963	134.93	136.29
821	58.424	146.77	140.65
822	58.424	151.5	142.83
823	58.424	149.13	143.92
824	58.424	149.13	143.92
825	58.424	149.13	143.92
826	58.424	149.13	143.92
827	58.424	149.13	143.92
828	58.424	149.13	143.92
829	56.963	149.13	143.92
830	58.424	151.5	143.92
831	58.424	151.5	143.92
832	58.424	151.5	143.92
833	58.424	151.5	143.92
834	58.424	151.5	143.92
835	55.503	146.77	148.28
836	55.503	146.77	146.1
837	55.503	146.77	146.1
838	55.503	146.77	146.1
839	55.503	146.77	146.1
840	55.503	146.77	146.1
841	55.503	146.77	141.74
842	55.503	146.77	141.74
843	55.503	146.77	141.74
844	55.503	146.77	141.74
845	55.503	146.77	141.74
846	54.042	138.48	139.56
847	56.963	136.11	140.65
848	56.963	131.38	142.83
849	56.963	131.38	142.83
850	56.963	131.38	142.83
851	56.963	131.38	142.83
852	56.963	131.38	142.83
853	56.963	131.38	142.83
854	56.963	133.75	142.83
855	58.424	138.48	141.74
856	58.424	138.48	141.74
857	58.424	138.48	141.74
858	58.424	138.48	141.74
859	58.424	138.48	141.74
860	54.042	138.48	135.2
861	52.582	140.85	137.38
862	52.582	140.85	137.38
863	52.582	140.85	137.38
864	52.582	140.85	137.38
865	52.582	140.85	137.38
866	51.121	136.11	135.2
867	51.121	136.11	135.2
868	51.121	136.11	135.2
869	51.121	136.11	135.2
870	51.121	136.11	135.2
871	51.121	133.75	135.2
872	51.121	133.75	130.84
873	51.121	131.38	119.93
874	51.121	131.38	119.93
875	51.121	131.38	119.93
876	51.121	131.38	119.93
877	51.121	131.38	119.93
878	51.121	131.38	119.93
879	48.2	131.38	115.57
880	49.66	126.65	113.39
881	49.66	126.65	113.39
882	49.66	126.65	113.39
883	49.66	126.65	113.39
884	49.66	126.65	113.39
885	48.2	126.65	113.39
886	46.739	126.65	109.03
887	46.739	126.65	109.03
888	46.739	126.65	109.03
889	46.739	126.65	109.03
890	46.739	126.65	109.03
891	46.739	129.01	109.03
892	46.739	129.01	109.03
893	46.739	129.01	109.03
894	46.739	129.01	109.03
895	46.739	129.01	109.03
896	43.818	124.28	104.67
897	43.818	117.18	104.67
898	45.279	117.18	102.49
899	45.279	117.18	102.49
900	45.279	117.18	102.49
901	45.279	117.18	102.49
902	45.279	117.18	102.49
903	45.279	117.18	102.49
904	45.279	117.18	102.49
905	45.279	107.71	102.49
906	45.279	107.71	102.49
907	45.279	107.71	102.49
908	45.279	107.71	102.49
909	45.279	107.71	102.49
910	46.739	110.07	98.127
911	46.739	110.07	98.127
912	46.739	110.07	98.127
913	46.739	110.07	98.127
914	46.739	110.07	98.127
915	46.739	110.07	98.127
916	48.2	107.71	98.127
917	48.2	107.71	98.127
918	48.2	107.71	98.127
919	48.2	107.71	98.127
920	48.2	107.71	98.127
921	49.66	110.07	98.127
922	48.2	112.44	100.31
923	48.2	106.52	102.49
924	48.2	106.52	102.49
925	48.2	106.52	102.49
926	48.2	106.52	102.49
927	48.2	106.52	102.49
928	48.2	106.52	102.49
929	46.739	111.26	104.67
930	48.2	113.63	104.67
931	48.2	113.63	104.67
932	48.2	113.63	104.67
933	48.2	113.63	104.67
934	48.2	113.63	104.67
935	48.2	113.63	102.49
936	48.2	108.89	98.127
937	48.2	108.89	98.127
938	48.2	108.89	98.127
939	48.2	108.89	98.127
940	48.2	108.89	98.127
941	51.121	111.26	98.127
942	51.121	111.26	98.127
943	51.121	111.26	98.127
944	51.121	111.26	98.127
945	51.121	111.26	98.127
946	52.582	110.07	100.31
947	54.042	107.71	102.49
948	54.042	110.07	100.31
949	54.042	110.07	100.31
950	54.042	110.07	100.31
951	54.042	110.07	100.31
952	54.042	110.07	100.31
953	54.042	110.07	100.31
954	56.963	110.07	100.31
955	56.963	119.54	98.127
956	56.963	119.54	98.127
957	56.963	119.54	98.127
958	56.963	119.54	98.127
959	56.963	119.54	98.127
960	58.424	119.54	95.946
961	58.424	117.18	100.31
962	58.424	117.18	100.31
963	58.424	117.18	100.31
964	58.424	117.18	100.31
965	58.424	117.18	100.31
966	59.885	117.18	95.946
967	59.885	117.18	95.946
968	59.885	117.18	95.946
969	59.885	117.18	95.946
970	59.885	117.18	95.946
971	61.345	114.81	95.946
972	61.345	114.81	93.766
973	61.345	113.63	95.946
974	61.345	113.63	95.946
975	61.345	113.63	95.946
976	61.345	113.63	95.946
977	61.345	113.63	95.946
978	61.345	113.63	95.946
979	59.885	115.99	95.946
980	59.885	113.63	91.585
981	59.885	113.63	91.585
982	59.885	113.63	91.585
983	59.885	113.63	91.585
984	59.885	113.63	91.585
985	58.424	108.89	89.405
986	58.424	106.52	87.224
987	58.424	106.52	87.224
988	58.424	106.52	87.224
989	58.424	106.52	87.224
990	58.424	106.52	87.224
991	56.963	106.52	87.224
992	56.963	106.52	87.224
993	56.963	106.52	87.224
994	56.963	106.52	87.224
995	56.963	106.52	87.224
996	56.963	104.16	78.502
997	54.042	104.16	74.14
998	54.042	108.89	74.14
[truncated: 1 more rows]
