# Supplementary material for: Quantitative control of noise in mammalian gene expression by dynamic histone regulation
Source: eLife. 2021 Aug 11;10:e65654. doi: 10.7554/eLife.65654 (PMC8357418; doi:10.7554/eLife.65654)
Supplement: Figure 5—figure supplement 1—source data 1. [file elife-65654-fig5-figsupp1-data1.xlsx]

## Sheet: Fig.5S2
Time (min)	Cell 1	Cell 2	Cell 3	Cell 4	Cell 5	Cell 6	Cell 7	Cell 8	Cell 9	Cell 10	Cell 11	Cell 12
90	0.36242	0.47384	0.39999	0.5507	0.42339	0.41167	0.41167	0.42116	0.36315	0.32664	0.37916	0.41056
180	0.36885	0.47918	0.491	0.61467	0.46363	0.42694	0.42694	0.44748	0.40636	0.45479	0.38493	0.48689
270	0.38741	0.4621	0.61612	0.79309	0.40537	0.45848	0.45848	0.48553	0.51375	0.57414	0.42662	0.57974
360	0.50051	0.47591	0.79696	0.94118	0.49827	0.53468	0.53468	0.52665	0.57182	0.87493	0.4456	0.74791
450	0.61346	0.45382	0.95367	1.1105	0.61524	0.65542	0.65542	0.59034	0.91158	1.1745	0.44333	0.89866
540	0.6851	0.53559	1.2151	1.0948	0.78335	0.77634	0.77634	0.57393	0.82547	1.1055	0.50225	0.74935
630	1.0339	0.64969	1.5928	1.5189	1.0356	1.0797	0.96738	0.94618	1.0012	1.2429	0.67738	0.79225
720	1.2541	0.80748	1.8906	1.5974	1.1771	1.2913	1.1936	0.83719	1.0459	1.3572	1.0174	0.81757
810	1.5593	1.2356	2.2029	1.7971	1.5999	1.4181	1.281	1.0719	1.1722	1.4083	1.3709	0.83278
900	1.6456	1.3634	2.5609	1.8293	1.7003	1.5362	1.4458	1.1518	1.2788	1.4631	1.6895	0.85603
990	1.7886	1.8099	2.7263	2.1406	1.8167	1.8287	1.5019	1.2609	1.2502	1.4965	1.7997	0.96944
1080	2.0112	1.7758	2.4945	2.7927	1.9669	1.96	1.5239	1.3473	1.3117	1.3768	1.828	1.136
1170	2.1618	1.9886	2.5764	3.1648	2.1101	1.9645	1.505	1.6419	1.339	1.5219	1.8449	1.24
1260	2.2979	1.8461	2.4276	3.0412	2.1818	2.212	1.7162	1.619	1.4687	1.5182	1.9481	1.4151
1350	2.4333	1.8349	2.3919	3.0094	2.4341	2.3434	1.8027	1.6825	1.5264	1.6241	1.9187	1.6365
1440	2.4439	1.795	2.3737	2.9251	2.6415	2.4266	1.8295	1.8093	1.7557	1.79	2.126	2.0605
1530	2.5435	1.8672	2.5682	2.9562	2.8838	2.7327	1.9454	1.9738	2.1141	2.4337	2.1453	2.2474
1620	2.6665	1.7722	2.5862	3.0393	2.9608	2.672	1.8216	2.0829	2.362	2.1455	2.245	2.2345
1710	2.7887	1.7087	2.6518	3.1686	3.1348	2.8117	1.897	2.0552	2.6866	2.4497	2.2747	2.1978
1800	2.8864	1.6999	2.7295	2.8033	3.3335	2.9818	1.9091	2.1523	2.6194	2.2727	2.404	2.0989
1890	2.9325	1.7784	2.893	2.7797	3.2974	3.3931	2.1854	2.319	2.7479	2.1612	2.6106	2.0141
1980	2.6509	1.7145	2.8118	2.5644	3.3233	3.3625	2.0092	2.0968	2.8566	1.9555	2.7161	1.8986
2070	2.6914	1.7206	2.7753	2.3453	3.3043	3.3625	1.9666	2.4347	2.8281	1.9062	2.8073	1.7707
2160	2.5423	1.6926	2.4242	2.1773	3.5596	3.3298	1.9459	2.2195	2.7772	1.7819	2.7854	1.7448
2250	2.4474	1.9218	2.3218	2.1904	3.2817	3.2723	1.8508	2.1217	2.6079	1.7958	2.7961	1.7077
2340	2.373	1.8557	2.3393	2.1213	3.237	3.4751	1.8153	2.0637	2.5472	1.9986	2.7562	1.6793
