# Supplementary material for: Quantitative control of noise in mammalian gene expression by dynamic histone regulation
Source: eLife. 2021 Aug 11;10:e65654. doi: 10.7554/eLife.65654 (PMC8357418; doi:10.7554/eLife.65654)
Supplement: Figure 6—figure supplement 1—source data 1. [file elife-65654-fig6-figsupp1-data1.xlsx]

## Sheet: 6A-data
mean log(CPM)	CV
0.51464	8.0163
2.4497	0.43028
1.9694	0.66564
2.3106	0.52631
1.6911	0.92247
1.54	1.0723
0.48584	3.7236
1.8654	0.79749
0.32038	4.084
0.60482	3.0937
1.8553	0.77381
0.69193	2.8155
1.2774	1.4531
0.99164	2.1043
1.768	0.86913
0.10673	5.2108
2.0632	0.59147
1.7	0.94265
1.4951	1.1365
1.0832	1.8841
1.1607	1.6895
0.79543	2.4663
0.059153	5.6022
1.103	1.7579
0.11498	5.292
0.37782	3.9412
0.48255	3.3244
1.8744	0.74332
1.6707	0.94289
0.3281	4.3288
0.048545	5.495
1.9709	0.71785
0.30872	4.2748
3.1027	0.26913
0.59636	3.1185
1.0485	1.8465
1.5777	1.0088
2.4614	0.41118
1.3571	1.2964
0.38915	3.7983
0.34957	4.1159
2.321	0.5328
0.40245	4.0585
0.60131	3.0456
0.92177	2.1389
0.45354	3.1904
1.0441	1.8657
0.32715	4.1055
2.2694	0.51128
1.754	0.85473
1.274	1.3903
2.7231	0.49272
0.4941	3.1011
0.27989	3.9719
0.21009	4.2604
0.15983	4.5118
1.1369	1.681
1.9655	0.70879
0.28401	4.2508
0.56474	3.1026
1.7699	0.87037
1.2668	1.3849
0.06053	5.578
1.2586	1.4706
1.0173	2.0362
1.5466	1.0726
0.4119	3.7773
1.8632	0.89168
0.27303	4.325
0.59407	3.2433
1.643	0.95935
1.6862	0.91317
0.92572	2.1683
0.385	3.8958
1.5093	1.1404
0.94136	2.1913
1.4341	1.2724
1.461	1.1689
0.81496	2.507
1.2185	1.5178
1.1704	1.5898
0.69772	2.6993
1.1356	1.7023
1.1434	1.6329
1.5604	1.0509
2.8518	0.34302
1.6349	0.96086
1.786	0.84856
1.1013	1.768
0.64873	2.7867
1.5256	1.0918
1.6536	0.92162
0.80049	2.4466
0.46512	3.5729
0.6998	2.7828
1.4855	1.1424
2.2906	0.468
2.0537	0.62357
2.6961	0.34685
1.3178	1.4011
0.76659	2.6913
2.0383	0.61741
3.035	0.27359
0.77625	2.5282
1.6754	0.90641
1.0904	1.7109
2.2053	0.65877
1.9815	0.64319
0.89515	2.1404
0.87721	2.1687
0.51125	3.3227
1.2403	1.457
1.7789	0.83962
1.7443	0.91396
0.89174	2.1553
0.6862	2.9097
1.0799	1.787
0.13887	5.1703
2.1267	0.59779
0.099784	5.2927
1.4731	1.2309
0.95194	2.3508
1.5571	1.0502
0.86983	2.0279
0.76105	2.5348
0.49042	3.3714
1.6522	0.99601
0.78152	2.6126
0.49921	3.4634
0.47415	3.6695
0.88427	2.2176
1.1387	1.6726
1.8169	0.88152
1.028	1.8007
1.2948	1.3852
1.1006	1.7422
1.5986	0.96772
0.37031	4.0802
1.4161	1.2677
1.5531	1.0253
1.1898	1.6036
0.19846	4.7018
0.69174	3.1872
2.5125	0.44905
1.3397	1.3451
2.9651	0.35897
3.2305	0.25237
2.063	0.62942
0.12026	5.4932
0.89003	2.1782
0.024085	5.6352
0.22049	4.531
0.20736	4.9268
0.55246	3.2175
0.69052	2.7012
1.2943	1.3782
1.6202	0.957
1.0292	2.0241
0.93588	2.121
1.8826	0.90026
2.5846	0.40426
1.8285	0.84727
1.7064	0.89115
1.3687	1.2618
1.9589	0.69756
1.1427	1.6453
2.2463	0.51537
0.72058	2.679
0.44068	3.6336
0.53579	6.7124
0.99667	1.9255
0.9864	1.922
1.4999	1.1192
0.83009	2.2935
0.80516	2.5265
2.6202	0.35798
0.91625	2.1044
2.6055	0.44695
1.1036	1.7642
0.037988	5.7906
1.0711	1.8403
0.44249	3.7555
0.15594	5.1891
1.9803	0.68416
0.56323	3.2217
1.465	1.1838
1.1241	1.6702
0.12291	5.0462
1.6158	0.98193
1.6288	1.0436
0.37526	3.5047
0.088914	5.2838
1.4754	1.5335
0.22491	4.7917
1.6618	0.96459
0.26652	4.3121
1.1129	1.8117
1.809	0.77742
3.0957	0.32949
0.42511	3.574
2.1265	0.77271
1.4509	1.2896
1.6032	0.98067
1.1689	1.6782
1.3857	1.2746
0.71763	2.6502
1.3968	1.3142
1.1534	1.6164
1.0712	1.9202
0.50318	3.3328
1.4283	1.1089
1.7594	0.90089
1.4023	1.3144
0.071661	5.8409
1.5329	1.0787
0.73629	2.6128
0.47924	3.7388
1.561	1.1978
1.3564	1.3006
1.3846	1.3337
1.8495	0.77108
1.6008	1.0459
0.41495	3.8886
0.65201	2.5462
1.1481	1.8158
1.2624	1.4548
1.8455	0.77288
1.0849	1.7926
3.4948	0.24155
2.3012	0.72536
1.0781	1.8571
2.5609	0.37984
2.2546	0.51319
1.9842	0.65183
0.74903	2.6805
1.0335	1.8623
1.6116	1.0183
0.78701	2.586
1.5672	1.0298
1.0745	1.8334
0.94336	2.0572
0.98854	1.9409
0.08857	5.6647
1.1263	1.649
0.22434	4.6172
0.86407	2.7438
0.17111	4.9011
0.73383	2.5936
1.2302	1.6453
1.2144	1.549
1.4942	1.1301
1.1209	1.6864
1.2405	1.6638
1.4908	1.2295
0.69662	2.7758
0.63332	2.9469
1.7302	0.89173
0.64691	2.9068
0.42713	3.7896
1.2242	1.5147
1.0745	1.7451
1.2856	1.4443
0.86989	2.1946
0.86953	2.3527
1.3115	1.731
0.0082402	6.0786
2.0433	0.61495
0.49577	3.6208
1.8161	0.90733
1.3773	1.41
0.5033	3.2222
1.6778	1.0636
1.6865	0.92912
0.46749	4.3487
2.1469	0.59344
0.23838	4.6256
0.80216	2.4665
2.0892	0.56557
1.8068	0.80387
0.67351	2.8218
2.1153	0.65205
0.41456	3.6489
0.33934	4.0219
0.68236	2.9333
0.33195	4.2499
0.14646	4.6563
1.8355	0.77076
1.1783	1.5906
2.3858	0.46304
0.45899	3.4392
0.9763	2.0132
1.1596	1.7119
3.3889	0.36607
0.69085	2.8152
3.8356	0.22527
1.5086	1.1121
1.54	1.0592
1.126	1.7281
0.33815	4.1313
0.83012	2.156
0.10506	5.7204
2.6893	0.40941
0.71098	2.8118
1.8008	0.83471
0.96798	1.9833
0.56225	3.1532
1.3735	1.3044
0.25813	4.5622
1.1783	1.5895
0.48796	3.3554
1.012	1.9046
0.29587	4.2784
1.7849	0.84179
0.54316	3.2866
0.11848	5.6231
0.88511	2.2467
1.3852	1.3044
0.57402	3.0895
1.8168	0.81094
0.76008	2.8263
1.718	0.88237
0.84374	2.3366
2.0376	0.61128
1.2706	1.4481
1.3167	1.3467
0.81003	2.3919
1.3865	1.2768
0.034072	5.6844
2.2828	0.46318
2.42	0.43431
0.62197	2.9812
0.51357	3.4534
0.83624	2.3599
0.12044	5.7213
1.115	1.7129
0.46066	4.0932
0.36544	3.9628
1.1956	1.5524
0.95857	2.0702
1.8138	0.77176
2.2438	0.5491
1.1596	1.6573
0.29885	4.4874
1.1259	1.6322
1.0313	1.9311
1.3984	1.2709
1.2563	1.5105
2.4882	0.43691
1.8847	0.76231
1.2961	1.3948
1.7039	0.80798
0.32795	4.0212
0.64287	2.9037
0.38955	3.7969
1.4441	1.1776
1.1865	1.548
0.95429	1.9978
0.37794	3.5083
0.61587	2.6805
0.92108	2.0859
1.6249	0.99891
0.54079	3.2879
0.0094024	5.7791
0.020473	6.1074
0.72598	2.6553
0.70062	2.6873
0.07298	5.8912
1.1879	1.5217
1.8829	0.7474
0.67543	2.7692
1.4962	1.1399
2.4391	0.42318
2.0076	0.67319
1.3746	1.3026
0.98549	2.2458
2.0807	0.72498
1.0412	1.8581
1.4416	1.2088
0.83365	2.2728
1.2536	1.4583
0.32665	4.2202
0.96005	2.0752
0.23664	4.5703
0.62112	2.9782
1.2081	1.5879
2.4289	0.50395
1.0467	1.8394
0.041882	5.7162
1.4162	1.2127
1.0888	1.7764
2.5076	0.42037
2.0796	0.60173
0.60765	3.0186
0.63952	3.0123
0.010215	5.7585
0.088648	5.0801
0.21363	4.6224
1.673	0.90525
1.5633	1.0453
1.0104	1.9425
0.63593	2.9602
1.3824	1.1212
1.7583	0.87654
0.43894	3.6066
2.152	0.58988
2.1512	0.62821
2.0033	0.64125
0.5526	3.2395
0.071235	5.2524
0.88479	2.2174
1.3407	1.3255
1.0149	1.8945
1.4837	1.1012
1.2091	1.5859
0.92132	2.101
1.1904	1.5958
0.61847	3.0596
2.7343	0.36319
0.43361	3.6973
0.11572	5.2119
0.92359	2.1253
0.41992	3.9201
0.71804	2.6429
0.64919	2.9329
0.66752	2.8839
0.44781	3.7232
1.1157	1.7436
0.36273	3.884
1.6139	1.0189
0.3357	4.02
1.4595	1.171
0.045983	5.5564
0.16477	5.0238
1.4432	1.1738
0.61123	3.0049
1.1824	1.6738
3.0612	0.27006
0.24635	4.1816
0.05553	5.4092
0.80372	2.6028
0.97456	2.2273
0.34867	3.9737
2.0723	0.62712
1.8239	0.80959
2.0616	0.59267
1.3387	1.3419
1.2998	1.3553
2.4443	0.59718
0.46346	3.5308
0.56218	3.1652
1.5072	1.1176
1.5494	1.1061
1.2671	1.2829
1.3226	1.5311
1.3905	1.2732
2.4347	0.42562
0.34666	4.0916
1.522	1.0834
1.3575	1.3983
1.1524	1.6237
0.58394	3.1564
0.046543	5.986
1.6478	0.9821
0.99092	1.9907
0.43313	3.4509
1.1429	1.6351
0.83665	2.2574
1.05	1.854
0.059852	5.4262
1.6233	0.98895
0.90149	2.2132
0.68552	3.0338
1.502	1.2603
1.2554	1.5132
1.7899	0.85107
1.3127	1.4196
0.57007	3.1599
0.33722	4.0767
0.26043	4.315
0.95157	2.0567
1.8712	1.0275
0.36406	3.893
0.33817	4.1131
0.46166	3.17
1.7487	0.86547
1.8392	0.802
1.2649	1.458
1.9292	0.70105
0.54025	3.2659
0.15211	5.262
1.1213	1.7012
2.684	0.3817
0.065415	5.4957
0.65961	2.8639
1.8949	0.79892
1.7136	0.91523
1.1725	1.6
1.7324	0.88645
0.038922	5.8859
1.6666	1.021
0.8697	2.2606
1.0367	1.8752
1.3728	1.2675
2.0318	0.68423
1.7169	0.92062
1.107	1.7001
0.93649	2.1938
1.4702	2.0566
0.41885	3.914
2.2295	0.64627
0.83047	3.3703
1.6291	1.2555
0.15424	5.1126
1.1013	1.6723
1.1593	1.7314
2.0445	0.60968
0.47388	3.3193
1.3209	1.4673
1.4253	1.2282
0.20456	4.8728
1.6903	0.93429
1.5909	0.91166
1.3839	1.5079
0.8277	2.091
1.2267	1.5407
0.73755	2.6924
1.1888	1.7135
0.926	2.1654
1.6079	1.0359
0.28058	4.2482
0.15775	5.0945
1.0559	1.8528
0.12559	5.1949
0.59909	3.0993
1.8557	0.75608
0.74082	2.6269
1.6645	0.90761
2.5565	0.37646
2.8231	0.35293
0.63511	2.8976
0.12188	4.9364
1.3116	1.4508
0.96992	2.0086
2.3353	0.80398
0.58027	3.0293
1.077	1.8927
1.0516	1.8415
0.81644	2.4428
2.3712	0.60533
1.327	1.4134
0.51969	3.3564
1.2289	1.5309
1.2081	1.5467
2.6063	0.46036
1.11	1.7406
0.84553	2.1053
1.7027	0.89749
0.82354	2.3247
1.2204	1.4986
0.80839	2.3963
0.49694	3.4753
0.84561	2.3785
1.2007	1.5585
1.5626	1.0197
1.959	0.84573
1.2312	1.5286
1.7336	0.84084
0.4126	3.7359
0.78973	2.4521
2.0844	0.60639
1.2974	1.4474
1.5262	1.1813
1.6116	1.0247
1.0264	2.1398
1.1199	1.7918
0.91265	2.3859
1.0573	1.8677
0.35332	4.5512
1.8465	0.85375
2.198	0.60157
1.625	0.94072
1.6866	1.3129
0.66203	3.1223
1.5909	1.0193
0.9518	2.1007
1.5009	1.1633
1.327	1.4928
1.1276	1.6931
1.2934	1.4366
1.6112	1.0043
2.0651	0.58839
0.92616	2.137
2.1977	0.51873
1.319	1.4244
0.66267	2.7582
1.1367	1.7032
2.3849	0.45803
0.88563	2.4213
1.2674	1.3751
1.1158	1.7443
2.4762	0.41812
1.3658	1.3362
0.85644	2.2261
0.91082	2.571
0.62485	2.9159
0.74965	5.03
1.143	1.6274
1.202	1.5069
1.8262	0.79909
1.185	1.5723
1.588	1.0243
0.81445	2.4094
1.1822	1.5586
1.1045	1.6964
1.013	2.1181
0.23885	4.5076
2.0467	0.9957
0.39573	4.1395
0.88105	2.6397
0.046444	5.3635
1.4722	1.119
0.39414	3.96
1.6713	0.94485
0.36858	3.5865
1.1757	1.6119
0.19479	4.5153
0.56316	3.2953
0.33182	4.0238
0.72349	2.6353
2.0279	0.67043
2.0887	0.63643
0.16038	5.5557
1.5562	1.1372
2.7839	0.45156
1.1743	1.6411
1.1696	1.5821
0.30847	3.7924
1.2395	1.5215
0.7692	2.474
1.4681	1.2144
2.0633	0.65343
1.3558	1.3193
0.54715	3.2868
0.9029	2.3063
2.588	0.473
1.4374	1.1842
1.7987	0.83249
3.2162	0.28681
0.36416	3.8865
2.0503	0.66489
2.1192	1.9081
2.0154	0.8019
1.7868	2.5967
0.23363	4.5539
0.02657	5.8701
1.8841	0.74438
2.3367	0.50907
1.8509	0.78638
2.0737	0.66354
2.4916	0.5914
0.78798	2.4753
1.06	1.8907
1.0769	1.8934
1.4154	1.3489
2.6581	0.35355
2.2344	0.59163
1.364	1.2883
1.2491	1.5108
0.98578	1.9823
0.46407	3.5352
0.72256	2.6231
0.24868	4.4954
1.1236	1.6621
1.2069	1.501
1.6395	0.9796
0.78024	2.4589
1.8247	0.80972
0.5241	3.3126
0.87674	2.3069
1.2168	1.4807
2.3342	0.68677
1.1648	1.5386
2.8002	0.38231
1.29	1.3998
2.2968	0.50803
0.067244	5.7097
0.11422	5.4798
1.4323	1.2038
0.77214	2.7265
1.4044	1.2801
0.32419	3.7961
2.0666	1.0766
0.49812	3.7334
1.687	0.9557
0.87812	2.1482
1.6497	0.9733
0.86445	2.2649
0.81235	2.3064
0.849	2.2982
0.20354	5.6055
1.3061	1.5639
0.98939	2.0349
1.7459	0.90085
0.281	4.3014
1.8773	0.75033
0.52373	3.5073
1.7935	1.0116
1.4526	1.1804
0.72312	2.7159
1.494	1.2074
0.30977	4.3
1.397	1.3295
1.1521	1.7293
0.15623	5.1329
0.023796	5.7635
0.56055	2.9206
0.97248	2.0106
1.1187	1.6976
1.2824	1.4772
0.37714	4.1219
0.62516	2.9275
2.4193	1.0295
0.33202	4.3468
0.50167	3.4408
0.11434	5.1636
1.5625	1.0538
0.51235	3.3093
1.9957	0.68303
1.2749	1.5032
0.78153	2.5619
0.46367	3.4853
1.3844	1.2956
2.1907	0.51682
0.67424	2.9937
0.68692	2.9557
1.1574	1.706
1.3084	1.3549
0.3114	4.1419
0.75366	2.7619
1.4802	1.1092
1.4175	1.2478
1.6477	1.0182
0.98382	2.0562
0.74698	2.684
1.0733	1.8684
1.8985	0.68754
2.0049	0.63405
1.3191	1.358
0.80834	2.4461
1.5228	1.0739
0.49038	3.4991
0.93541	2.0944
0.79601	2.6635
1.6854	0.94013
2.7657	0.30706
1.6994	0.90316
0.82375	2.4876
0.96707	3.6695
2.3105	0.47244
1.1779	1.5661
1.1149	1.6713
1.5998	0.96617
0.23657	4.5411
0.86617	2.306
1.5773	1.0048
0.78642	2.4626
2.0531	0.97883
0.33673	3.9956
1.471	1.2176
0.20938	4.6944
1.3952	1.2776
1.0068	1.9943
1.252	1.4404
0.055692	5.746
0.050616	6.0819
0.61185	3.117
0.3516	4.067
1.835	0.81298
1.4165	1.2992
0.1676	5.0498
1.5488	1.1541
1.087	1.7926
0.73387	2.6057
1.412	1.3137
0.79824	2.5723
1.6559	1.0586
1.3378	1.3846
0.84806	2.2793
0.3626	3.4918
1.3462	1.328
1.6702	0.92166
1.3549	1.2954
1.3549	1.3156
2.0818	0.58985
1.2734	1.4381
0.66528	2.7773
1.8126	0.80144
0.57778	2.9613
1.8165	0.82418
1.0241	1.8446
1.6432	0.96104
0.18422	4.9477
0.25367	4.5354
0.37807	3.9638
1.4663	1.1564
2.7369	0.38444
0.82608	2.4234
0.45635	3.5061
0.8361	2.4274
1.2376	1.672
2.0358	0.65766
1.5396	1.0742
1.0991	1.7052
1.1122	1.8157
1.5258	1.1914
0.91934	2.1808
0.034063	5.682
1.3418	1.3308
0.53834	3.3054
0.6427	2.8794
0.16219	5.0228
0.98521	1.9533
0.80159	2.4261
2.3668	0.44716
1.3447	1.1958
1.7221	0.87967
0.89573	2.2781
1.6593	0.96863
1.395	1.2604
1.9083	0.70811
0.55163	3.248
0.9818	1.9647
0.92795	2.0982
0.41133	3.6184
1.5624	1.0392
0.32568	4.2349
0.96085	2.083
1.5283	1.062
1.7046	0.85446
0.34289	4.0155
1.3377	1.3233
1.1315	1.7648
1.4802	1.1975
1.8262	0.86135
1.2241	1.5744
1.6929	0.90305
1.1175	1.7404
3.1034	0.25421
1.2947	1.4144
1.5375	1.103
1.7759	0.87508
1.5039	1.0979
1.0458	1.8372
0.63604	2.879
0.41937	3.7002
1.9691	0.6988
1.847	0.81394
0.17867	4.979
0.75048	2.4873
0.39741	3.9475
1.0246	1.9841
0.59491	3.0751
1.5277	1.0785
0.76062	2.6681
0.97357	2.0222
1.2168	1.5507
1.3172	1.3488
0.93672	2.0743
1.2687	1.4784
1.6342	1.0578
1.4113	1.2248
1.3121	1.342
1.3444	1.3251
1.16	1.592
1.0299	1.8723
1.5457	1.0838
0.35103	3.9105
1.8213	0.84649
1.6855	0.91985
1.9903	0.76711
0.73711	2.6828
3.18	0.31147
0.38124	4.0407
1.3794	1.3024
0.89872	2.2109
1.2398	1.5024
1.5192	1.1563
1.2547	1.4122
0.39965	3.7478
0.97611	1.8972
0.76308	2.5161
1.7298	0.85353
1.3367	1.3385
0.66207	2.8718
1.2861	1.3975
0.81487	2.3845
1.577	1.0015
1.2987	1.6998
1.4544	1.1835
1.0386	1.8317
0.99248	2.1887
0.60366	3.3303
1.279	1.4336
1.6858	0.906
1.6731	0.89442
0.58991	3.1462
1.2769	1.4113
0.58517	3.1339
1.5093	1.0965
0.9163	2.1691
1.9662	0.78179
2.0467	0.65787
1.6884	1.1119
1.153	1.6406
0.42626	3.7553
1.7439	0.83669
1.7387	0.86901
0.83402	2.3582
0.97711	2.068
1.5456	0.94884
2.5529	0.37205
0.94312	2.0445
0.32686	4.2158
1.1244	1.6875
2.0792	0.63569
1.3416	1.3333
0.90308	2.2075
0.38622	3.9284
1.1189	1.785
1.6073	0.97171
0.78375	2.5092
0.69125	2.6934
0.67805	2.7
1.2892	1.3953
1.8089	0.80819
0.37596	3.7298
1.6774	0.91893
0.61751	3.1701
0.73329	2.6573
0.72686	2.666
0.14475	5.0402
3.597	0.23839
0.63844	2.9676
0.42171	3.7897
0.17772	12.458
0.63413	2.8198
0.77325	2.4646
1.3974	1.2493
1.1317	1.6322
0.13082	5.2855
1.1512	1.709
1.5272	1.1077
1.7648	0.82767
2.4377	0.81073
1.2644	1.4363
1.8278	0.81061
1.9897	0.68689
0.62504	3.0897
0.18807	4.8377
1.3574	1.3451
2.2008	0.53271
0.89045	2.4327
0.30706	4.3185
0.5889	3.1653
1.4928	1.2175
2.3684	0.44529
1.344	1.3302
1.2337	1.5014
0.70127	2.8434
1.3104	1.2431
1.3175	1.3435
1.6519	0.9729
0.94564	2.0596
0.80356	2.4051
1.6461	0.94045
2.064	0.63413
1.0122	1.9692
0.050825	5.5919
0.010561	5.757
0.69093	3.1691
0.96935	1.9917
2.2868	0.47864
1.393	1.3026
0.25698	4.6568
0.061172	5.9651
3.2634	0.2279
2.1083	0.55952
0.91938	2.11
0.95785	2.002
0.3643	3.8502
0.078776	5.329
1.6849	0.89764
0.31527	3.8897
0.46323	3.2009
0.62138	2.8062
0.5041	3.3446
0.80999	2.4193
1.6081	1.0295
0.76057	2.5297
1.6915	0.92603
0.72085	2.737
1.7368	0.84562
0.97272	2.3335
0.6049	3.0034
0.30312	4.429
2.6159	0.46413
0.090465	5.2528
0.28629	4.0438
1.6371	0.96917
1.3794	1.2488
0.76391	2.4987
2.4714	0.40348
1.8677	0.81943
0.3218	4.2062
1.6101	1.023
0.65608	2.9746
1.6145	1.0229
1.2724	1.4919
1.0487	1.8668
1.7195	0.96563
2.0248	0.66496
0.72936	2.6944
1.5391	1.1553
0.99256	2.0947
1.6132	1.0451
1.0429	1.8176
2.2267	0.51704
1.3343	1.4483
1.1915	1.6331
0.2792	4.2622
0.28513	4.2788
0.17563	5.432
0.35886	4.046
0.50083	3.4846
0.061858	5.6203
0.72755	2.6403
0.57979	3.1254
0.85529	2.3115
1.9542	0.74141
0.81342	3.4739
0.86343	2.1461
0.90403	2.1597
2.3749	0.44952
0.41916	3.7402
0.311	4.374
1.0885	1.7522
0.61978	2.995
2.5887	0.36096
1.428	1.161
1.5247	1.0959
1.854	0.75595
1.714	0.93087
0.76651	2.5391
1.1832	1.5668
2.1385	0.56309
1.0784	1.7437
2.3508	0.47044
1.12	1.6685
0.70794	2.6509
2.0304	0.76181
1.5915	1.1024
0.5985	3.0174
1.905	0.82369
1.7053	0.90149
1.4889	1.1953
2.2568	0.48612
0.2999	4.3404
1.4144	1.1929
0.77411	2.4805
0.52884	3.3912
1.1739	1.6783
1.769	0.87139
2.6164	0.36961
1.5435	1.0484
1.0358	1.7301
0.48663	3.7032
0.35108	4.1806
2.2416	0.49349
1.3332	1.2109
2.8793	0.49248
1.8896	0.80139
1.5258	1.062
0.32112	4.0502
0.54212	3.4575
1.3682	1.2601
0.46779	3.6482
0.98011	2.0026
0.23852	4.6785
1.4301	1.2474
0.88247	2.2006
1.7081	0.92772
1.9502	0.68849
0.90393	2.1766
1.5949	1.0046
1.9066	0.73656
0.88543	2.2175
1.4748	1.141
0.42678	3.3241
2.4642	0.43926
0.87844	2.1962
0.76586	2.6521
1.6168	1.5092
1.3996	1.248
2.3485	0.5177
1.3706	1.2997
1.8743	0.79282
1.4315	1.2028
1.5743	1.0873
0.57382	3.2952
0.64446	2.9529
0.25841	4.8149
2.0087	0.68855
0.59964	3.2566
1.3573	1.2768
2.6128	0.38263
1.321	1.4403
0.38809	3.7328
1.6751	0.92853
1.5985	1.0609
2.5033	0.41404
1.0079	2.0118
1.9252	0.69672
1.0729	1.7436
1.9892	0.68997
2.2902	0.49119
0.67321	3.1471
2.4168	0.4348
0.6849	2.8581
0.76767	2.4407
0.13863	5.7416
0.97952	2.0405
0.89285	2.2244
0.6465	4.5408
0.84722	2.3129
1.2563	1.4349
0.87398	2.2553
0.069203	5.1559
2.0583	0.70703
0.55414	3.0821
1.4744	1.1529
1.0915	1.7478
0.70841	2.6536
0.78016	2.4543
2.6992	0.44657
1.5412	1.0833
1.0308	1.9285
1.3882	1.3188
0.61295	2.9198
1.1912	1.5693
1.1945	1.5602
1.2709	1.4645
0.68062	2.6754
0.11713	5.255
1.0293	1.9058
0.43671	3.7484
0.21506	4.5281
1.5575	1.0465
0.32732	4.1057
1.2441	1.4879
1.7204	0.88797
0.82322	2.4151
0.52642	3.244
1.9652	0.69432
1.5141	1.0994
0.90977	2.1455
0.087308	5.3493
1.2989	1.4094
1.2919	1.3993
1.8012	0.91305
0.084716	5.0798
1.0376	2.1038
1.4568	1.1372
1.5781	1.0174
1.4227	1.2651
0.067395	5.9073
1.4766	1.167
2.4176	0.53943
0.37667	4.167
1.5493	1.0456
0.31386	4.2174
1.732	0.89486
0.62777	3.0323
0.58442	3.2027
1.7522	0.86917
1.2332	1.5031
1.2549	1.4478
1.4221	1.2218
0.25243	4.547
0.28564	4.2472
2.4274	0.41285
1.8624	0.83901
0.95558	2.4917
1.3036	1.3769
1.7919	0.81373
1.6929	0.90657
0.28332	4.2262
1.3955	1.4228
1.7486	0.84185
0.39252	3.8262
1.5674	1.1988
0.15322	5.2823
1.7592	0.85977
1.3377	1.4083
2.0852	0.64163
0.35015	3.9562
2.7187	0.42408
0.84787	2.3121
1.8765	0.71338
1.6758	0.92621
1.8753	0.75536
1.6455	0.98366
1.5211	1.1985
1.7203	0.79174
1.9375	0.72245
1.0933	1.7126
1.6059	1.0227
0.93145	2.0546
1.5581	1.2386
0.14782	5.3649
1.5167	1.1285
1.7108	0.90941
0.090474	5.7781
1.2726	1.4644
2.6753	0.34842
0.3631	4.4563
2.0749	0.70754
0.35849	4.2792
1.4554	1.2366
0.27891	3.9488
1.195	1.5783
0.69747	2.7581
0.32618	4.1941
0.94247	2.0274
0.66456	2.8216
1.8463	0.8709
1.8689	0.78836
1.2399	1.4626
0.86814	2.4374
1.3822	1.3199
1.013	1.8751
0.47017	3.6814
1.2494	1.5124
0.51834	3.4158
0.92498	2.0867
1.932	0.8198
1.5013	1.1563
0.10074	5.3796
1.3187	1.3505
1.7935	0.85521
0.97926	1.9573
1.9567	1.098
1.4416	1.1757
2.1642	0.552
1.5221	1.2031
1.4321	1.1859
0.99251	1.9253
1.9505	0.74301
0.56215	3.212
0.26404	4.2886
1.3526	1.3713
0.80374	2.4925
1.0986	1.7369
0.72283	2.6898
2.1893	0.56222
1.4688	1.1405
0.9098	2.1593
1.2504	1.4497
0.58869	3.0538
0.70384	2.6598
0.69637	2.6827
1.3298	1.3443
0.087474	5.1209
1.4467	1.1582
0.7993	2.3866
0.98193	1.948
0.53567	3.2953
1.1972	1.5437
1.2399	1.5734
1.2934	1.5519
0.55266	3.1182
0.66112	3.0222
0.11556	5.1923
2.1745	0.62111
2.4944	0.39535
2.0708	0.57988
1.3507	1.2701
0.29838	4.0236
1.3617	1.2923
1.6933	0.958
0.56143	3.1587
1.6106	1.2966
1.6013	1.0256
1.5816	0.96086
0.31161	4.2299
1.322	1.541
0.13194	4.5093
1.0937	1.9189
0.77942	2.5407
0.62087	2.9703
0.90982	2.8514
0.85379	2.3988
1.294	1.381
1.9438	0.76286
2.2235	0.59912
2.6978	0.4338
0.51336	3.3571
0.89116	2.2118
1.5958	1.0293
1.2932	1.4072
1.9411	0.68305
1.2188	1.4757
1.3261	1.3567
0.27128	4.3994
1.4249	1.2083
1.643	0.94445
1.4775	1.0501
1.7527	0.89024
1.2159	1.5837
0.82581	2.3338
1.1679	1.6364
1.6149	1.0204
0.24854	4.7511
0.73374	2.6331
2.1188	0.72523
1.4358	1.1786
0.89172	2.2395
1.3607	1.3307
0.81929	2.3932
0.89986	2.1701
0.53502	3.3344
2.3748	0.45755
0.0805	5.8405
0.97772	2.0059
1.6398	0.97569
1.866	0.76742
1.3467	1.5835
0.024918	6.2081
1.7481	0.86433
1.1232	1.7008
1.3238	1.4024
0.6015	3.146
0.2487	4.6716
0.96628	1.9891
1.2276	1.4985
1.4625	1.1543
1.8129	0.96867
1.5139	1.2904
0.24424	4.7428
1.0501	1.842
2.6473	0.34762
2.2946	0.53472
1.9276	0.67394
1.1891	1.6446
0.46168	3.4527
1.2878	1.3926
1.4377	1.193
0.36482	4.085
2.006	0.64523
0.8163	2.3601
0.75985	2.5336
1.7159	0.90772
1.8493	0.77151
0.22906	4.5805
0.98391	2.0015
0.10796	5.3924
0.9292	2.0577
0.40103	3.9872
0.57464	6.7341
1.7229	0.8511
0.017245	5.6158
1.5345	1.1342
0.94082	2.1222
0.62125	2.9165
0.99762	1.9664
1.6067	1.003
0.7491	2.5443
0.65835	2.5457
0.83516	2.3731
1.0245	1.9273
1.2354	1.5061
1.4867	1.1543
1.7562	0.8512
0.4683	3.5325
1.5237	1.1116
1.0334	1.8162
1.0214	1.8889
1.9087	0.74198
0.90147	2.1637
1.7764	0.78261
0.36069	4.1876
1.2525	1.4869
0.26058	4.4222
1.379	1.58
1.2567	1.5528
0.96105	2.0064
0.86927	2.3021
0.3802	4.118
0.81373	2.467
0.88654	2.176
2.4655	0.44627
1.089	1.7404
1.3185	1.3889
0.80119	5.0496
0.73411	2.6349
2.3559	0.48981
0.12886	5.1626
2.3397	0.54339
2.2325	0.69885
0.51832	3.0401
2.4405	0.46587
0.18508	4.9163
1.2563	1.4497
0.43282	3.8966
1.2162	1.484
0.086089	5.205
1.4949	1.1053
0.91423	2.0843
1.6328	0.94524
1.6544	0.96178
1.523	1.0844
0.32942	4.1449
1.9528	0.65749
1.9055	0.73517
0.90206	2.1706
0.58414	3.0178
2.4245	0.43968
1.9536	0.68925
1.08	1.8253
0.78467	2.5281
2.3324	0.70664
0.91325	2.0523
0.94095	2.0505
0.44001	3.623
0.19725	4.6659
1.3552	1.3167
0.44584	3.5348
1.0164	1.8763
1.0355	1.8728
0.31024	4.3269
0.55193	2.9591
1.0307	1.8999
0.5543	3.2158
1.3182	1.3259
1.2737	1.4661
0.98662	2.0026
2.1422	0.5572
0.067586	5.7715
2.4353	0.41924
0.1629	5.4485
1.4989	1.1287
0.91873	2.1637
0.52426	3.4049
1.4165	1.423
2.4493	0.77272
1.7337	0.78123
2.2758	0.48927
1.5865	1.0212
1.2317	1.483
1.865	0.77066
0.52862	2.9296
0.40366	3.9718
1.1264	1.7479
1.6841	0.94197
1.4196	1.2679
1.7742	0.85788
2.4606	1.5135
0.22091	4.6774
1.3532	1.3173
2.2738	0.73655
1.2711	1.4633
0.80593	2.5764
1.5845	1.0527
0.98691	1.9719
0.87197	2.2182
1.0297	1.9083
0.1685	5.1689
1.6769	0.95224
0.74088	2.7923
1.386	1.3126
1.6643	1.2917
2.2374	0.49704
0.11454	5.1841
0.74697	2.5293
1.0735	1.8095
1.3237	1.3426
0.20417	4.7577
1.3411	1.4108
1.0164	1.9978
0.12816	5.4319
2.1767	0.54476
0.25266	4.0628
2.3226	0.46478
3.4045	0.32424
0.72492	2.4877
1.6293	0.97112
2.3398	0.47469
1.81	0.87071
1.2215	1.5249
0.65434	2.8102
1.3551	1.3171
1.1891	1.6335
1.3195	1.4183
0.5021	3.4276
1.4974	1.1112
1.2945	1.4243
0.3211	4.0119
0.78085	2.5008
2.3884	0.4416
1.1294	1.6411
1.0916	1.7695
1.8995	0.70903
0.5538	3.144
1.2067	1.5676
1.3443	1.2985
2.3313	0.5165
2.8904	0.36855
1.9771	0.68016
2.1909	0.60405
0.040834	5.9037
1.7334	0.88659
0.69482	2.7931
1.2384	1.4398
1.4988	1.1157
1.242	1.5225
0.72983	2.703
2.3992	0.44932
1.1783	1.5691
0.98472	1.9214
0.40024	3.8843
1.3938	1.2988
1.0536	1.817
0.29358	3.9686
2.0428	0.61772
1.52	1.0731
0.97322	2.0375
0.91926	2.1026
0.17146	5.5017
0.40606	3.8656
1.8007	0.79805
0.99857	1.873
1.5511	1.0734
0.21398	4.7221
1.2824	1.4548
1.1491	1.9454
1.1181	1.7204
1.0946	1.7867
0.45137	3.6417
1.3126	1.5864
0.97396	1.9645
2.5205	0.49216
1.1817	1.5684
0.099848	5.3976
0.28264	4.1376
1.7087	0.92781
2.3777	0.44454
1.4575	1.1332
2.3445	0.57031
0.5363	3.7048
0.17461	4.992
1.6582	1.0343
0.83254	2.5274
0.21572	5.0594
0.8782	2.231
0.60225	3.5429
0.56729	3.0971
1.5603	1.0164
1.8004	0.81735
0.75665	2.6002
0.45681	3.7008
2.8234	0.3181
2.0186	0.66877
1.985	0.70795
0.18841	5.1953
0.90296	2.417
0.092875	5.6154
1.8795	2.1305
2.4181	0.44794
1.7925	0.7887
2.192	0.82291
1.2453	1.8756
1.8862	0.69977
2.6356	0.84557
0.91273	2.2466
1.6559	0.96257
0.9588	2.0343
1.4841	1.1302
0.36879	4.2499
1.8173	1.045
1.3915	1.4087
1.9836	0.70416
0.96103	2.0627
0.78486	2.7408
0.0054383	6.4121
0.28987	4.3297
1.4148	1.1846
0.29227	4.2913
0.5404	3.1817
1.7354	0.83163
1.0784	1.7909
0.92195	2.1358
1.3489	1.3017
2.0727	0.67534
2.256	0.63689
1.8066	0.84147
0.23571	4.6453
0.6251	2.9292
1.5295	1.1125
1.4989	1.1509
2.567	0.3953
1.8152	0.82789
2.548	0.40927
0.94708	2.1227
2.1531	1.0983
0.70927	2.8148
1.7403	0.88612
1.0371	1.9309
1.2423	1.5078
1.5425	1.072
1.5226	1.1068
0.3736	5.4297
1.0842	1.7687
1.7747	0.85504
2.3242	0.57382
2.1243	0.57753
1.0775	1.7751
1.2032	1.5658
1.9995	0.67123
1.0139	1.8241
0.78186	2.5133
1.2247	1.5321
2.282	0.58344
2.0634	0.63295
0.78943	2.4843
1.397	1.2644
0.44662	3.7381
0.22982	4.7984
2.6036	0.42056
0.18136	4.6776
0.57333	3.1918
1.2551	1.4958
2.237	0.95588
1.742	0.88808
0.25012	4.7485
2.1423	0.57648
1.3155	1.2429
1.6147	1.3463
0.41116	3.8482
2.1685	0.5487
1.5514	1.1029
1.9649	0.98136
1.0738	1.8076
1.5292	1.083
1.5413	1.0545
1.4754	1.0925
1.3266	1.3328
1.2434	1.4422
2.2566	0.55724
1.5314	1.0726
1.7788	1.0558
2.8968	0.29349
2.0168	0.62739
0.61557	2.8973
0.68377	2.5866
0.91418	2.1784
0.65107	2.6985
0.66082	2.9441
0.87333	2.2409
0.48826	3.4196
0.80184	2.3737
0.28035	3.979
0.34311	3.9009
0.93501	2.0405
0.39369	4.0323
0.33427	3.8238
0.38285	3.5514
0.98811	1.9678
0.42831	3.8156
0.34827	4.2528
0.94362	2.2765
1.2316	1.4963
0.36148	4.2439
1.2954	1.4196
2.7282	0.40845
0.29589	4.2892
1.171	1.5894
0.94794	2.0471
2.1606	0.56556
0.57522	3.1523
3.6347	0.21885
0.78251	2.5207
1.2761	1.4307
1.4075	1.2195
1.6323	1.0293
1.7032	0.95849
1.9015	0.73679
1.9307	0.72094
1.3589	1.4262
1.2234	1.5123
0.46085	3.5862
2.0421	0.68608
0.87957	2.2097
1.7712	1.1979
1.4621	1.1821
1.5861	1.0041
1.0403	1.9006
0.051271	5.5595
0.23549	4.5306
2.0233	0.64739
1.6808	0.98079
0.91939	2.0732
1.2308	1.5076
1.8724	0.75812
0.7947	2.446
0.41053	3.9137
1.4427	1.1702
0.96468	2.0475
1.6156	0.96114
0.75084	2.5314
0.21409	4.4916
0.06756	5.6501
1.3256	1.6672
0.33123	4.0464
1.5539	1.1416
0.97512	1.9976
0.17539	4.6806
1.834	0.86288
0.77261	2.5375
1.1577	1.7613
1.4267	1.2511
0.84267	2.4556
1.3719	1.361
1.2781	1.4302
1.6877	0.92973
1.0464	1.9498
1.0332	1.8593
1.8716	0.77441
2.1983	0.56743
1.8901	0.89272
1.984	0.90227
1.7377	0.91887
0.25256	4.7233
0.478	3.2007
1.5841	1.1134
0.9253	2.0955
3.2024	0.34869
0.25154	4.6331
0.92795	2.1513
1.7879	0.91332
1.8636	0.89932
1.5246	1.1127
0.3784	4.3766
1.2385	1.5696
0.99718	1.9608
0.83583	2.3423
1.6695	0.99023
1.2771	1.5794
1.9198	0.80819
1.1939	1.5954
1.0368	1.839
0.051171	5.7859
2.2312	0.68226
1.5794	0.89659
2.2606	0.61113
1.0464	1.8553
1.3429	1.3623
1.2075	1.5659
1.435	1.2199
0.66946	2.8892
0.92295	2.2287
2.3425	0.51295
1.5486	1.0596
2.032	0.64938
1.4509	1.1674
1.0798	1.9167
1.5469	1.0593
0.53991	3.217
1.5893	1.1237
0.35902	3.9445
1.0858	1.7847
1.493	1.1331
0.41359	3.7154
1.3568	1.7357
1.1466	1.6751
0.2335	4.0252
1.0368	1.8877
0.59071	3.4007
1.6276	1.128
1.1095	1.8232
0.73439	2.3445
2.6772	0.46614
0.694	2.7882
1.1918	1.633
2.1553	0.64244
0.955	2.0428
1.1566	1.6438
3.5147	0.30957
1.7877	0.90931
1.6475	0.94183
2.2084	0.59515
0.92418	2.2039
2.5602	0.88155
1.0557	3.0329
0.81353	4.2113
1.391	1.8845
0.67043	2.8103
1.6176	1.115
1.787	0.90882
1.7054	0.96779
0.80658	2.4178
1.956	0.78596
1.5299	1.1688
1.4442	1.2617
2.0149	1.015
0.26319	4.5375
1.1272	1.6988
0.47246	3.6225
1.8425	0.84013
0.74913	2.5725
1.8251	0.86699
0.92214	2.1694
0.93024	2.1134
1.7686	0.91385
0.49881	3.4628
0.63685	2.8715
0.57946	3.1545
1.3876	1.3701
0.50358	3.4213
0.16322	8.6496
0.6836	2.9535
0.60594	3.0992
0.63015	3.205
1.4038	1.1107
0.93491	2.1364
1.4515	1.2812
2.178	0.6112
0.86239	2.3817
1.1764	1.6869
0.6437	2.743
0.38647	3.8343
0.020438	6.0942
0.57761	3.7459
0.47653	3.3257
0.52449	3.3464
0.76563	2.4801
0.8824	2.3615
0.70108	2.8604
0.7923	3.0275
1.0278	1.9958
1.8922	0.79428
0.6094	2.9622
0.72208	3.9545
1.7794	0.98159
0.15583	5.3201
0.899	2.4878
0.80697	2.3744
0.26454	4.5102
1.0447	2.292
0.6478	2.6839
0.5939	2.7391
1.8937	0.88385
1.5773	1.7212
0.44719	3.5634
1.2669	1.463
1.066	1.813
1.0218	1.9866
0.76046	2.5746
0.75031	2.5835
1.9342	0.91007
1.8161	0.8786
0.58544	3.2149
1.705	0.95283
1.1718	1.736
0.69077	2.8364
0.67139	2.8731
0.84814	2.3596
0.04304	5.5043
1.3831	1.2571
2.0301	0.99742
1.4912	1.3127
2.0998	0.7326
0.36183	4.0076
1.9799	0.72966
2.2926	0.65446
0.57834	3.2124
1.7379	0.93223
1.7843	1.0618
1.8	0.83035
1.3068	1.4991
1.2748	1.4647
1.6718	1.0264
1.7547	0.90655
3.0153	0.46781
1.0221	1.9802
1.5307	1.229
1.3306	1.3629
1.8302	0.95742
0.30069	4.4417
2.012	0.72822
1.629	1.1149
0.091888	5.3511
0.86348	2.2307
0.47671	3.5188
1.1194	1.7158
2.5443	0.56455
1.3158	1.4591
0.14444	5.0838
2.0614	0.74347
0.73157	2.7076
0.22715	4.5125
1.3304	1.3729
2.0446	0.70419
0.76423	2.6522
0.36082	4.0278
0.85283	2.3303
1.9059	0.89735
0.84036	2.3853
0.42989	3.6957
1.021	1.725
1.6199	1.0694
1.0037	2.1312
0.95086	2.1463
1.0477	1.9677
1.0358	1.8917
1.948	0.95196
1.9168	0.82002
1.0241	2.0813
1.7254	0.91644
1.2853	1.7039
1.6878	0.94439
2.1432	0.61155
0.98395	2.0017
1.7719	0.85485
1.9648	0.8583
1.4295	1.2561
0.52969	3.3177
0.61242	3.0307
0.3894	3.911
1.2724	1.5134
0.73407	2.6527
2.211	0.60939
1.875	0.93405
0.79526	2.169
0.30166	4.6275
0.35469	4.1598
1.4928	1.1547
0.77521	3.0007
1.4182	1.9535
1.6769	1.0011
0.25212	4.4259
0.42548	3.8044
1.9582	0.72466
1.6439	1.012
1.9125	0.85929
1.0511	1.8479
1.0046	2.2551
2.4881	0.53626
1.8341	0.85976
0.9432	2.0996
0.12607	5.2763
0.81585	2.3763
1.5716	1.1002
2.6362	0.45552
2.067	0.73182
2.2252	0.6389
1.6158	1.1075
1.7437	0.94376
0.55297	3.2818
2.2496	0.55943
1.7487	0.91752
3.6922	0.40524
0.90635	4.9586
0.60902	2.9151
0.64426	2.7809
0.5127	3.3964
1.5266	1.1177
1.8798	0.8722
0.94171	3.133
0.95683	2.0224
0.73481	2.5819
0.2601	4.6416
0.38253	4.1542
0.36896	4.0249
0.18787	4.4082
1.9675	0.89041
1.0164	2.2437
1.424	1.2897
0.52871	2.8927
0.66813	2.71
1.284	1.4342
2.3602	0.54161
0.38163	3.7369
2.5519	0.59741
0.38454	3.7779
1.8132	0.9292
3.1412	0.4031
0.94255	2.1929
2.7029	0.52963
0.32174	4.1514
0.9777	2.1841
[truncated: 35,903 more rows]

## Sheet: 6A-fit-cutoff
mean log(CPM)	CV	cutoff
0	6.1787	8.0874
0.30103	4.4486	5.9374
0.47712	3.6708	4.9555
0.60206	3.2029	4.359
0.69897	2.8815	3.9462
0.77815	2.6429	3.6381
0.8451	2.4567	3.3965
0.90309	2.3061	3.2002
0.95424	2.1809	3.0364
1	2.0746	2.8971
1.0414	1.983	2.7766
1.0792	1.9029	2.6709
1.1139	1.832	2.5773
1.1461	1.7688	2.4935
1.1761	1.7119	2.418
1.2041	1.6603	2.3494
1.2304	1.6133	2.2868
1.2553	1.5702	2.2292
1.2788	1.5305	2.1761
1.301	1.4937	2.1269
1.3222	1.4596	2.0812
1.3424	1.4277	2.0384
1.3617	1.398	1.9984
1.3802	1.37	1.9609
1.3979	1.3438	1.9255
1.415	1.319	1.8921
1.4314	1.2957	1.8606
1.4472	1.2735	1.8306
1.4624	1.2525	1.8022
1.4771	1.2325	1.7752
1.4914	1.2135	1.7494
1.5051	1.1954	1.7248
1.5185	1.1781	1.7013
1.5315	1.1616	1.6788
1.5441	1.1457	1.6573
1.5563	1.1305	1.6366
1.5682	1.1159	1.6167
1.5798	1.1019	1.5976
1.5911	1.0884	1.5792
1.6021	1.0754	1.5615
1.6128	1.0629	1.5444
1.6232	1.0509	1.5279
1.6335	1.0392	1.5119
1.6435	1.0279	1.4965
1.6532	1.0171	1.4816
1.6628	1.0065	1.4672
1.6721	0.9963	1.4532
1.6812	0.98641	1.4396
1.6902	0.97682	1.4264
1.699	0.96751	1.4136
1.7076	0.95847	1.4012
1.716	0.94969	1.3891
1.7243	0.94116	1.3774
1.7324	0.93285	1.3659
1.7404	0.92478	1.3548
1.7482	0.91691	1.344
1.7559	0.90925	1.3334
1.7634	0.90179	1.3231
1.7709	0.89451	1.3131
1.7782	0.88741	1.3033
1.7853	0.88049	1.2937
1.7924	0.87373	1.2843
1.7993	0.86713	1.2752
1.8062	0.86068	1.2663
1.8129	0.85438	1.2576
1.8195	0.84822	1.249
1.8261	0.8422	1.2407
1.8325	0.8363	1.2325
1.8388	0.83054	1.2245
1.8451	0.82489	1.2167
1.8513	0.81936	1.209
1.8573	0.81395	1.2015
1.8633	0.80865	1.1941
1.8692	0.80345	1.1869
1.8751	0.79835	1.1798
1.8808	0.79336	1.1729
1.8865	0.78846	1.1661
1.8921	0.78365	1.1594
1.8976	0.77893	1.1528
1.9031	0.7743	1.1464
1.9085	0.76976	1.14
1.9138	0.76529	1.1338
1.9191	0.76091	1.1277
1.9243	0.7566	1.1217
1.9294	0.75237	1.1158
1.9345	0.74821	1.11
1.9395	0.74412	1.1043
1.9445	0.7401	1.0987
1.9494	0.73615	1.0932
1.9542	0.73226	1.0877
1.959	0.72844	1.0824
1.9638	0.72467	1.0771
1.9685	0.72097	1.0719
1.9731	0.71732	1.0668
1.9777	0.71374	1.0618
1.9823	0.7102	1.0569
1.9868	0.70672	1.052
1.9912	0.7033	1.0472
1.9956	0.69992	1.0425
2	0.69659	1.0378
2.0043	0.69332	1.0332
2.0086	0.69009	1.0287
2.0128	0.6869	1.0242
2.017	0.68376	1.0198
2.0212	0.68067	1.0155
2.0253	0.67762	1.0112
2.0294	0.67461	1.007
2.0334	0.67164	1.0028
2.0374	0.66871	0.99869
2.0414	0.66583	0.99464
2.0453	0.66298	0.99063
2.0492	0.66016	0.98668
2.0531	0.65739	0.98277
2.0569	0.65465	0.97892
2.0607	0.65194	0.97512
2.0645	0.64928	0.97136
2.0682	0.64664	0.96765
2.0719	0.64404	0.96399
2.0755	0.64147	0.96037
2.0792	0.63893	0.95679
2.0828	0.63642	0.95326
2.0864	0.63394	0.94976
2.0899	0.63149	0.94631
2.0934	0.62907	0.9429
2.0969	0.62668	0.93953
2.1004	0.62432	0.9362
2.1038	0.62199	0.93291
2.1072	0.61968	0.92965
2.1106	0.6174	0.92643
2.1139	0.61514	0.92325
2.1173	0.61291	0.9201
2.1206	0.61071	0.91698
2.1239	0.60853	0.9139
2.1271	0.60637	0.91086
2.1303	0.60424	0.90784
2.1335	0.60213	0.90486
2.1367	0.60004	0.90191
2.1399	0.59797	0.89899
2.143	0.59593	0.8961
2.1461	0.59391	0.89324
2.1492	0.59191	0.89041
2.1523	0.58993	0.88761
2.1553	0.58797	0.88484
2.1584	0.58603	0.88209
2.1614	0.58411	0.87937
2.1644	0.58221	0.87668
2.1673	0.58033	0.87402
2.1703	0.57847	0.87138
2.1732	0.57663	0.86877
2.1761	0.5748	0.86618
2.179	0.573	0.86362
2.1818	0.57121	0.86108
2.1847	0.56943	0.85857
2.1875	0.56768	0.85608
2.1903	0.56594	0.85361
2.1931	0.56422	0.85117
2.1959	0.56251	0.84875
2.1987	0.56082	0.84635
2.2014	0.55915	0.84397
2.2041	0.55749	0.84161
2.2068	0.55584	0.83928
2.2095	0.55421	0.83697
2.2122	0.5526	0.83467
2.2148	0.551	0.8324
2.2175	0.54942	0.83015
2.2201	0.54784	0.82791
2.2227	0.54629	0.8257
2.2253	0.54474	0.8235
2.2279	0.54321	0.82133
2.2304	0.5417	0.81917
2.233	0.54019	0.81703
2.2355	0.5387	0.81491
2.238	0.53722	0.81281
2.2405	0.53576	0.81072
2.243	0.5343	0.80865
2.2455	0.53286	0.8066
2.248	0.53143	0.80456
2.2504	0.53002	0.80255
2.2529	0.52861	0.80054
2.2553	0.52722	0.79856
2.2577	0.52584	0.79659
2.2601	0.52446	0.79463
2.2625	0.5231	0.79269
2.2648	0.52175	0.79077
2.2672	0.52042	0.78886
2.2695	0.51909	0.78697
2.2718	0.51777	0.78509
2.2742	0.51646	0.78323
2.2765	0.51517	0.78137
2.2788	0.51388	0.77954
2.281	0.5126	0.77772
2.2833	0.51134	0.77591
2.2856	0.51008	0.77411
2.2878	0.50883	0.77233
2.29	0.50759	0.77056
2.2923	0.50636	0.76881
2.2945	0.50514	0.76707
2.2967	0.50393	0.76534
2.2989	0.50273	0.76362
2.301	0.50154	0.76191
2.3032	0.50035	0.76022
2.3054	0.49918	0.75854
2.3075	0.49801	0.75687
2.3096	0.49685	0.75522
2.3118	0.4957	0.75357
2.3139	0.49456	0.75194
2.316	0.49343	0.75032
2.3181	0.4923	0.74871
2.3201	0.49118	0.74711
2.3222	0.49007	0.74552
2.3243	0.48897	0.74394
2.3263	0.48788	0.74237
2.3284	0.48679	0.74082
2.3304	0.48571	0.73927
2.3324	0.48464	0.73774
2.3345	0.48357	0.73621
2.3365	0.48252	0.7347
2.3385	0.48146	0.73319
2.3404	0.48042	0.7317
2.3424	0.47939	0.73022
2.3444	0.47836	0.72874
2.3464	0.47733	0.72728
2.3483	0.47632	0.72582
2.3502	0.47531	0.72437
2.3522	0.47431	0.72294
2.3541	0.47331	0.72151
2.356	0.47232	0.72009
2.3579	0.47134	0.71868
2.3598	0.47036	0.71728
2.3617	0.46939	0.71589
2.3636	0.46843	0.7145
2.3655	0.46747	0.71313
2.3674	0.46652	0.71176
2.3692	0.46557	0.7104
2.3711	0.46463	0.70905
2.3729	0.4637	0.70771
2.3747	0.46277	0.70638
2.3766	0.46185	0.70506
2.3784	0.46093	0.70374
2.3802	0.46002	0.70243
2.382	0.45911	0.70113
2.3838	0.45821	0.69984
2.3856	0.45732	0.69855
2.3874	0.45643	0.69727
2.3892	0.45554	0.696
2.3909	0.45467	0.69474
2.3927	0.45379	0.69348
2.3945	0.45292	0.69224
2.3962	0.45206	0.691
2.3979	0.4512	0.68976
2.3997	0.45035	0.68853
2.4014	0.4495	0.68732
2.4031	0.44866	0.6861
2.4048	0.44782	0.6849
2.4065	0.44699	0.6837
2.4082	0.44616	0.68251
2.4099	0.44534	0.68132
2.4116	0.44452	0.68014
2.4133	0.4437	0.67897
2.415	0.44289	0.6778
2.4166	0.44209	0.67665
2.4183	0.44129	0.67549
2.42	0.44049	0.67435
2.4216	0.4397	0.67321
2.4232	0.43891	0.67207
2.4249	0.43813	0.67095
2.4265	0.43735	0.66982
2.4281	0.43658	0.66871
2.4298	0.43581	0.6676
2.4314	0.43504	0.6665
2.433	0.43428	0.6654
2.4346	0.43352	0.66431
2.4362	0.43277	0.66322
2.4378	0.43202	0.66214
2.4393	0.43127	0.66106
2.4409	0.43053	0.66
2.4425	0.4298	0.65893
2.444	0.42906	0.65787
2.4456	0.42833	0.65682
2.4472	0.42761	0.65578
2.4487	0.42688	0.65473
2.4502	0.42617	0.6537
2.4518	0.42545	0.65267
2.4533	0.42474	0.65164
2.4548	0.42403	0.65062
2.4564	0.42333	0.64961
2.4579	0.42263	0.6486
2.4594	0.42194	0.64759
2.4609	0.42124	0.64659
2.4624	0.42055	0.6456
2.4639	0.41987	0.64461
2.4654	0.41919	0.64362
2.4669	0.41851	0.64264
2.4683	0.41783	0.64166
2.4698	0.41716	0.64069
2.4713	0.41649	0.63973
2.4728	0.41583	0.63877
2.4742	0.41516	0.63781
2.4757	0.41451	0.63686
2.4771	0.41385	0.63591
2.4786	0.4132	0.63497
2.48	0.41255	0.63403
2.4814	0.4119	0.6331
2.4829	0.41126	0.63217
2.4843	0.41062	0.63124
2.4857	0.40998	0.63032
2.4871	0.40935	0.62941
2.4886	0.40872	0.62849
2.49	0.40809	0.62759
2.4914	0.40747	0.62668
2.4928	0.40685	0.62578
2.4942	0.40623	0.62489
2.4955	0.40561	0.624
2.4969	0.405	0.62311
2.4983	0.40439	0.62223
2.4997	0.40378	0.62135
2.5011	0.40318	0.62047
2.5024	0.40258	0.6196
2.5038	0.40198	0.61874
2.5051	0.40138	0.61787
2.5065	0.40079	0.61701
2.5079	0.4002	0.61616
2.5092	0.39961	0.61531
2.5105	0.39903	0.61446
2.5119	0.39844	0.61362
2.5132	0.39786	0.61278
2.5145	0.39729	0.61194
2.5159	0.39671	0.61111
2.5172	0.39614	0.61028
2.5185	0.39557	0.60945
2.5198	0.395	0.60863
2.5211	0.39444	0.60782
2.5224	0.39388	0.607
2.5237	0.39332	0.60619
2.525	0.39276	0.60538
2.5263	0.39221	0.60458
2.5276	0.39166	0.60378
2.5289	0.39111	0.60298
2.5302	0.39056	0.60219
2.5315	0.39001	0.6014
2.5328	0.38947	0.60061
2.534	0.38893	0.59983
2.5353	0.38839	0.59905
2.5366	0.38786	0.59827
2.5378	0.38732	0.5975
2.5391	0.38679	0.59672
2.5403	0.38626	0.59596
2.5416	0.38574	0.59519
2.5428	0.38521	0.59443
2.5441	0.38469	0.59367
2.5453	0.38417	0.59292
2.5465	0.38365	0.59217
2.5478	0.38314	0.59142
2.549	0.38263	0.59067
2.5502	0.38211	0.58993
2.5514	0.38161	0.58919
2.5527	0.3811	0.58846
2.5539	0.38059	0.58772
2.5551	0.38009	0.58699
2.5563	0.37959	0.58626
2.5575	0.37909	0.58554
2.5587	0.37859	0.58482
2.5599	0.3781	0.5841
2.5611	0.37761	0.58338
2.5623	0.37712	0.58267
2.5635	0.37663	0.58196
2.5647	0.37614	0.58125
2.5658	0.37566	0.58055
2.567	0.37517	0.57985
2.5682	0.37469	0.57915
2.5694	0.37421	0.57845
2.5705	0.37374	0.57776
2.5717	0.37326	0.57707
2.5729	0.37279	0.57638
2.574	0.37232	0.57569
2.5752	0.37185	0.57501
2.5763	0.37138	0.57433
2.5775	0.37091	0.57365
2.5786	0.37045	0.57297
2.5798	0.36999	0.5723
2.5809	0.36953	0.57163
2.5821	0.36907	0.57096
2.5832	0.36861	0.5703
2.5843	0.36815	0.56964
2.5855	0.3677	0.56898
2.5866	0.36725	0.56832
2.5877	0.3668	0.56766
2.5888	0.36635	0.56701
2.5899	0.3659	0.56636
2.5911	0.36546	0.56571
2.5922	0.36502	0.56507
2.5933	0.36457	0.56442
2.5944	0.36413	0.56378
2.5955	0.3637	0.56314
2.5966	0.36326	0.56251
2.5977	0.36282	0.56187
2.5988	0.36239	0.56124
2.5999	0.36196	0.56061
2.601	0.36153	0.55999
2.6021	0.3611	0.55936
2.6031	0.36067	0.55874
2.6042	0.36025	0.55812
2.6053	0.35982	0.5575
2.6064	0.3594	0.55689
2.6075	0.35898	0.55627
2.6085	0.35856	0.55566
2.6096	0.35814	0.55505
2.6107	0.35773	0.55445
2.6117	0.35731	0.55384
2.6128	0.3569	0.55324
2.6138	0.35649	0.55264
2.6149	0.35608	0.55204
2.616	0.35567	0.55144
2.617	0.35526	0.55085
2.618	0.35485	0.55026
2.6191	0.35445	0.54967
2.6201	0.35405	0.54908
2.6212	0.35364	0.54849
2.6222	0.35324	0.54791
2.6232	0.35285	0.54733
2.6243	0.35245	0.54675
2.6253	0.35205	0.54617
2.6263	0.35166	0.54559
2.6274	0.35126	0.54502
2.6284	0.35087	0.54445
2.6294	0.35048	0.54388
2.6304	0.35009	0.54331
2.6314	0.3497	0.54274
2.6325	0.34932	0.54218
2.6335	0.34893	0.54161
2.6345	0.34855	0.54105
2.6355	0.34817	0.54049
2.6365	0.34778	0.53994
2.6375	0.3474	0.53938
2.6385	0.34703	0.53883
2.6395	0.34665	0.53828
2.6405	0.34627	0.53773
2.6415	0.3459	0.53718
2.6425	0.34552	0.53663
2.6435	0.34515	0.53609
2.6444	0.34478	0.53555
2.6454	0.34441	0.53501
2.6464	0.34404	0.53447
2.6474	0.34367	0.53393
2.6484	0.34331	0.5334
2.6493	0.34294	0.53286
2.6503	0.34258	0.53233
2.6513	0.34222	0.5318
2.6522	0.34185	0.53127
2.6532	0.34149	0.53075
2.6542	0.34113	0.53022
2.6551	0.34078	0.5297
2.6561	0.34042	0.52918
2.6571	0.34006	0.52866
2.658	0.33971	0.52814
2.659	0.33936	0.52762
2.6599	0.339	0.52711
2.6609	0.33865	0.52659
2.6618	0.3383	0.52608
2.6628	0.33795	0.52557
2.6637	0.33761	0.52506
2.6646	0.33726	0.52455
2.6656	0.33692	0.52405
2.6665	0.33657	0.52355
2.6675	0.33623	0.52304
2.6684	0.33589	0.52254
2.6693	0.33554	0.52204
2.6702	0.3352	0.52155
2.6712	0.33487	0.52105
2.6721	0.33453	0.52056
2.673	0.33419	0.52006
2.6739	0.33386	0.51957
2.6749	0.33352	0.51908
2.6758	0.33319	0.51859
2.6767	0.33285	0.51811
2.6776	0.33252	0.51762
2.6785	0.33219	0.51714
2.6794	0.33186	0.51665
2.6803	0.33153	0.51617
2.6812	0.33121	0.51569
2.6821	0.33088	0.51521
2.683	0.33055	0.51474
2.6839	0.33023	0.51426
2.6848	0.32991	0.51379
2.6857	0.32958	0.51331
2.6866	0.32926	0.51284
2.6875	0.32894	0.51237
2.6884	0.32862	0.51191
2.6893	0.3283	0.51144
2.6902	0.32799	0.51097
2.6911	0.32767	0.51051
2.692	0.32735	0.51005
2.6928	0.32704	0.50958
2.6937	0.32672	0.50912
2.6946	0.32641	0.50867
2.6955	0.3261	0.50821
2.6964	0.32579	0.50775
2.6972	0.32548	0.5073
2.6981	0.32517	0.50684
2.699	0.32486	0.50639
2.6998	0.32455	0.50594
2.7007	0.32425	0.50549
2.7016	0.32394	0.50504
2.7024	0.32364	0.5046
2.7033	0.32333	0.50415
2.7042	0.32303	0.5037
2.705	0.32273	0.50326
2.7059	0.32242	0.50282
2.7067	0.32212	0.50238
2.7076	0.32182	0.50194
2.7084	0.32153	0.5015
2.7093	0.32123	0.50106
2.7101	0.32093	0.50063
2.711	0.32064	0.50019
2.7118	0.32034	0.49976
2.7126	0.32005	0.49933
2.7135	0.31975	0.4989
2.7143	0.31946	0.49847
2.7152	0.31917	0.49804
2.716	0.31888	0.49761
2.7168	0.31859	0.49719
2.7177	0.3183	0.49676
2.7185	0.31801	0.49634
2.7193	0.31772	0.49592
2.7202	0.31743	0.49549
2.721	0.31715	0.49507
2.7218	0.31686	0.49466
2.7226	0.31658	0.49424
2.7235	0.31629	0.49382
2.7243	0.31601	0.4934
2.7251	0.31573	0.49299
2.7259	0.31545	0.49258
2.7267	0.31517	0.49216
2.7275	0.31489	0.49175
2.7284	0.31461	0.49134
2.7292	0.31433	0.49093
2.73	0.31405	0.49053
2.7308	0.31377	0.49012
2.7316	0.3135	0.48971
2.7324	0.31322	0.48931
2.7332	0.31295	0.48891
2.734	0.31268	0.4885
2.7348	0.3124	0.4881
2.7356	0.31213	0.4877
2.7364	0.31186	0.4873
2.7372	0.31159	0.48691
2.738	0.31132	0.48651
2.7388	0.31105	0.48611
2.7396	0.31078	0.48572
2.7404	0.31051	0.48532
2.7412	0.31024	0.48493
2.7419	0.30998	0.48454
2.7427	0.30971	0.48415
2.7435	0.30945	0.48376
2.7443	0.30918	0.48337
2.7451	0.30892	0.48298
2.7459	0.30866	0.48259
2.7466	0.30839	0.48221
2.7474	0.30813	0.48182
2.7482	0.30787	0.48144
2.749	0.30761	0.48106
2.7497	0.30735	0.48068
2.7505	0.30709	0.48029
2.7513	0.30683	0.47991
2.752	0.30658	0.47954
2.7528	0.30632	0.47916
2.7536	0.30606	0.47878
2.7543	0.30581	0.47841
2.7551	0.30555	0.47803
2.7559	0.3053	0.47766
2.7566	0.30505	0.47728
2.7574	0.30479	0.47691
2.7582	0.30454	0.47654
2.7589	0.30429	0.47617
2.7597	0.30404	0.4758
2.7604	0.30379	0.47543
2.7612	0.30354	0.47506
2.7619	0.30329	0.4747
2.7627	0.30304	0.47433
2.7634	0.30279	0.47397
2.7642	0.30255	0.4736
2.7649	0.3023	0.47324
2.7657	0.30205	0.47288
2.7664	0.30181	0.47252
2.7672	0.30156	0.47216
2.7679	0.30132	0.4718
2.7686	0.30108	0.47144
2.7694	0.30083	0.47108
2.7701	0.30059	0.47072
2.7709	0.30035	0.47037
2.7716	0.30011	0.47001
2.7723	0.29987	0.46966
2.7731	0.29963	0.46931
2.7738	0.29939	0.46895
2.7745	0.29915	0.4686
2.7752	0.29891	0.46825
2.776	0.29867	0.4679
2.7767	0.29844	0.46755
2.7774	0.2982	0.4672
2.7782	0.29797	0.46686
2.7789	0.29773	0.46651
2.7796	0.2975	0.46616
2.7803	0.29726	0.46582
2.781	0.29703	0.46548
2.7818	0.2968	0.46513
2.7825	0.29656	0.46479
2.7832	0.29633	0.46445
2.7839	0.2961	0.46411
2.7846	0.29587	0.46377
2.7853	0.29564	0.46343
2.786	0.29541	0.46309
2.7868	0.29518	0.46275
2.7875	0.29495	0.46242
2.7882	0.29473	0.46208
2.7889	0.2945	0.46174
2.7896	0.29427	0.46141
2.7903	0.29405	0.46108
2.791	0.29382	0.46074
2.7917	0.2936	0.46041
2.7924	0.29337	0.46008
2.7931	0.29315	0.45975
2.7938	0.29292	0.45942
2.7945	0.2927	0.45909
2.7952	0.29248	0.45876
2.7959	0.29226	0.45844
2.7966	0.29204	0.45811
2.7973	0.29181	0.45778
2.798	0.29159	0.45746
2.7987	0.29137	0.45713
2.7993	0.29115	0.45681
2.8	0.29094	0.45649
2.8007	0.29072	0.45617
2.8014	0.2905	0.45584
2.8021	0.29028	0.45552
2.8028	0.29007	0.4552
2.8035	0.28985	0.45488
2.8041	0.28963	0.45457
2.8048	0.28942	0.45425
2.8055	0.2892	0.45393
2.8062	0.28899	0.45361
2.8069	0.28878	0.4533
2.8075	0.28856	0.45298
2.8082	0.28835	0.45267
2.8089	0.28814	0.45236
2.8096	0.28793	0.45204
2.8102	0.28771	0.45173
2.8109	0.2875	0.45142
2.8116	0.28729	0.45111
2.8122	0.28708	0.4508
2.8129	0.28687	0.45049
2.8136	0.28666	0.45018
2.8142	0.28646	0.44987
2.8149	0.28625	0.44957
2.8156	0.28604	0.44926
2.8162	0.28583	0.44895
2.8169	0.28563	0.44865
2.8176	0.28542	0.44834
2.8182	0.28522	0.44804
2.8189	0.28501	0.44774
2.8195	0.28481	0.44743
2.8202	0.2846	0.44713
2.8209	0.2844	0.44683
2.8215	0.28419	0.44653
2.8222	0.28399	0.44623
2.8228	0.28379	0.44593
2.8235	0.28359	0.44563
2.8241	0.28338	0.44533
2.8248	0.28318	0.44504
2.8254	0.28298	0.44474
2.8261	0.28278	0.44444
2.8267	0.28258	0.44415
2.8274	0.28238	0.44385
2.828	0.28218	0.44356
2.8287	0.28199	0.44327
2.8293	0.28179	0.44297
2.8299	0.28159	0.44268
2.8306	0.28139	0.44239
2.8312	0.2812	0.4421
2.8319	0.281	0.44181
2.8325	0.2808	0.44152
2.8331	0.28061	0.44123
2.8338	0.28041	0.44094
2.8344	0.28022	0.44065
2.8351	0.28002	0.44036
2.8357	0.27983	0.44008
2.8363	0.27964	0.43979
2.837	0.27944	0.43951
2.8376	0.27925	0.43922
2.8382	0.27906	0.43894
2.8388	0.27887	0.43865
2.8395	0.27868	0.43837
2.8401	0.27849	0.43809
2.8407	0.2783	0.43781
2.8414	0.2781	0.43752
2.842	0.27792	0.43724
2.8426	0.27773	0.43696
2.8432	0.27754	0.43668
2.8439	0.27735	0.4364
2.8445	0.27716	0.43613
2.8451	0.27697	0.43585
2.8457	0.27679	0.43557
2.8463	0.2766	0.43529
2.847	0.27641	0.43502
2.8476	0.27623	0.43474
2.8482	0.27604	0.43447
2.8488	0.27585	0.43419
2.8494	0.27567	0.43392
2.85	0.27548	0.43365
2.8506	0.2753	0.43337
2.8513	0.27512	0.4331
2.8519	0.27493	0.43283
2.8525	0.27475	0.43256
2.8531	0.27457	0.43229
2.8537	0.27439	0.43202
2.8543	0.2742	0.43175
2.8549	0.27402	0.43148
2.8555	0.27384	0.43121
2.8561	0.27366	0.43094
2.8567	0.27348	0.43068
2.8573	0.2733	0.43041
2.8579	0.27312	0.43014
2.8585	0.27294	0.42988
2.8591	0.27276	0.42961
2.8597	0.27258	0.42935
2.8603	0.2724	0.42908
2.8609	0.27223	0.42882
2.8615	0.27205	0.42856
2.8621	0.27187	0.42829
2.8627	0.27169	0.42803
2.8633	0.27152	0.42777
2.8639	0.27134	0.42751
2.8645	0.27117	0.42725
2.8651	0.27099	0.42699
2.8657	0.27082	0.42673
2.8663	0.27064	0.42647
2.8669	0.27047	0.42621
2.8675	0.27029	0.42595
2.8681	0.27012	0.4257
2.8686	0.26995	0.42544
2.8692	0.26977	0.42518
2.8698	0.2696	0.42493
2.8704	0.26943	0.42467
2.871	0.26926	0.42442
2.8716	0.26908	0.42416
2.8722	0.26891	0.42391
2.8727	0.26874	0.42365
2.8733	0.26857	0.4234
2.8739	0.2684	0.42315
2.8745	0.26823	0.4229
2.8751	0.26806	0.42265
2.8756	0.26789	0.42239
2.8762	0.26772	0.42214
2.8768	0.26756	0.42189
2.8774	0.26739	0.42164
2.8779	0.26722	0.4214
2.8785	0.26705	0.42115
2.8791	0.26688	0.4209
2.8797	0.26672	0.42065
2.8802	0.26655	0.4204
2.8808	0.26638	0.42016
2.8814	0.26622	0.41991
2.882	0.26605	0.41967
2.8825	0.26589	0.41942
2.8831	0.26572	0.41917
2.8837	0.26556	0.41893
2.8842	0.26539	0.41869
2.8848	0.26523	0.41844
2.8854	0.26507	0.4182
2.8859	0.2649	0.41796
2.8865	0.26474	0.41772
2.8871	0.26458	0.41747
2.8876	0.26441	0.41723
2.8882	0.26425	0.41699
2.8887	0.26409	0.41675
2.8893	0.26393	0.41651
2.8899	0.26377	0.41627
2.8904	0.26361	0.41603
2.891	0.26345	0.4158
2.8915	0.26329	0.41556
2.8921	0.26313	0.41532
2.8927	0.26297	0.41508
2.8932	0.26281	0.41485
2.8938	0.26265	0.41461
2.8943	0.26249	0.41437
2.8949	0.26233	0.41414
2.8954	0.26217	0.4139
2.896	0.26201	0.41367
2.8965	0.26186	0.41343
2.8971	0.2617	0.4132
2.8976	0.26154	0.41297
2.8982	0.26138	0.41273
2.8987	0.26123	0.4125
2.8993	0.26107	0.41227
2.8998	0.26092	0.41204
2.9004	0.26076	0.41181
2.9009	0.26061	0.41158
2.9015	0.26045	0.41135
2.902	0.2603	0.41112
2.9025	0.26014	0.41089
2.9031	0.25999	0.41066
2.9036	0.25983	0.41043
2.9042	0.25968	0.4102
2.9047	0.25953	0.40997
2.9053	0.25937	0.40975
2.9058	0.25922	0.40952
2.9063	0.25907	0.40929
2.9069	0.25892	0.40907
2.9074	0.25876	0.40884
2.9079	0.25861	0.40861
2.9085	0.25846	0.40839
2.909	0.25831	0.40816
2.9096	0.25816	0.40794
2.9101	0.25801	0.40772
2.9106	0.25786	0.40749
2.9112	0.25771	0.40727
2.9117	0.25756	0.40705
2.9122	0.25741	0.40683
2.9128	0.25726	0.4066
2.9133	0.25711	0.40638
2.9138	0.25696	0.40616
2.9143	0.25681	0.40594
2.9149	0.25667	0.40572
2.9154	0.25652	0.4055
2.9159	0.25637	0.40528
2.9165	0.25622	0.40506
2.917	0.25608	0.40484
2.9175	0.25593	0.40463
2.918	0.25578	0.40441
2.9186	0.25564	0.40419
2.9191	0.25549	0.40397
2.9196	0.25534	0.40376
2.9201	0.2552	0.40354
2.9206	0.25505	0.40332
2.9212	0.25491	0.40311
2.9217	0.25476	0.40289
2.9222	0.25462	0.40268
2.9227	0.25447	0.40246
2.9232	0.25433	0.40225
2.9238	0.25419	0.40203
2.9243	0.25404	0.40182
2.9248	0.2539	0.40161
2.9253	0.25376	0.4014
2.9258	0.25361	0.40118
2.9263	0.25347	0.40097
2.9269	0.25333	0.40076
2.9274	0.25319	0.40055
2.9279	0.25305	0.40034
2.9284	0.2529	0.40013
2.9289	0.25276	0.39992
2.9294	0.25262	0.39971
2.9299	0.25248	0.3995
2.9304	0.25234	0.39929
2.9309	0.2522	0.39908
2.9315	0.25206	0.39887
2.932	0.25192	0.39866
2.9325	0.25178	0.39845
2.933	0.25164	0.39825
2.9335	0.2515	0.39804
2.934	0.25136	0.39783
2.9345	0.25123	0.39763
2.935	0.25109	0.39742
2.9355	0.25095	0.39722
2.936	0.25081	0.39701
2.9365	0.25067	0.39681
2.937	0.25054	0.3966
2.9375	0.2504	0.3964
2.938	0.25026	0.39619
2.9385	0.25013	0.39599
2.939	0.24999	0.39579
2.9395	0.24985	0.39558
2.94	0.24972	0.39538
2.9405	0.24958	0.39518
2.941	0.24945	0.39498
2.9415	0.24931	0.39478
2.942	0.24918	0.39457
2.9425	0.24904	0.39437
2.943	0.24891	0.39417
2.9435	0.24877	0.39397
2.944	0.24864	0.39377
2.9445	0.2485	0.39357
2.945	0.24837	0.39337
2.9455	0.24824	0.39317
2.946	0.2481	0.39298
2.9465	0.24797	0.39278
2.9469	0.24784	0.39258
2.9474	0.2477	0.39238
2.9479	0.24757	0.39219
2.9484	0.24744	0.39199
2.9489	0.24731	0.39179
2.9494	0.24718	0.3916
2.9499	0.24704	0.3914
2.9504	0.24691	0.3912
2.9509	0.24678	0.39101
2.9513	0.24665	0.39081
2.9518	0.24652	0.39062
2.9523	0.24639	0.39042
2.9528	0.24626	0.39023
2.9533	0.24613	0.39004
2.9538	0.246	0.38984
2.9542	0.24587	0.38965
2.9547	0.24574	0.38946
2.9552	0.24561	0.38926
2.9557	0.24548	0.38907
2.9562	0.24535	0.38888
2.9566	0.24523	0.38869
2.9571	0.2451	0.3885
2.9576	0.24497	0.38831
2.9581	0.24484	0.38811
2.9586	0.24471	0.38792
2.959	0.24459	0.38773
2.9595	0.24446	0.38754
2.96	0.24433	0.38735
2.9605	0.24421	0.38717
2.9609	0.24408	0.38698
2.9614	0.24395	0.38679
2.9619	0.24383	0.3866
2.9624	0.2437	0.38641
2.9628	0.24357	0.38622
2.9633	0.24345	0.38604
2.9638	0.24332	0.38585
2.9643	0.2432	0.38566
2.9647	0.24307	0.38548
2.9652	0.24295	0.38529
2.9657	0.24282	0.3851
2.9661	0.2427	0.38492
2.9666	0.24257	0.38473
2.9671	0.24245	0.38455
2.9675	0.24233	0.38436
2.968	0.2422	0.38418
2.9685	0.24208	0.38399
2.9689	0.24196	0.38381
2.9694	0.24183	0.38363
2.9699	0.24171	0.38344
2.9703	0.24159	0.38326
2.9708	0.24146	0.38308
2.9713	0.24134	0.38289
2.9717	0.24122	0.38271
2.9722	0.2411	0.38253
2.9727	0.24098	0.38235
2.9731	0.24086	0.38217
2.9736	0.24073	0.38199
2.9741	0.24061	0.38181
2.9745	0.24049	0.38163
2.975	0.24037	0.38144
2.9754	0.24025	0.38126
2.9759	0.24013	0.38108
2.9763	0.24001	0.38091
2.9768	0.23989	0.38073
2.9773	0.23977	0.38055
2.9777	0.23965	0.38037
2.9782	0.23953	0.38019
2.9786	0.23941	0.38001
2.9791	0.23929	0.37983
2.9795	0.23917	0.37966
2.98	0.23905	0.37948
2.9805	0.23894	0.3793
2.9809	0.23882	0.37913
2.9814	0.2387	0.37895
2.9818	0.23858	0.37877
2.9823	0.23846	0.3786
2.9827	0.23835	0.37842
2.9832	0.23823	0.37825
2.9836	0.23811	0.37807
2.9841	0.23799	0.3779
2.9845	0.23788	0.37772
2.985	0.23776	0.37755
2.9854	0.23764	0.37737
2.9859	0.23753	0.3772
2.9863	0.23741	0.37703
2.9868	0.2373	0.37685
2.9872	0.23718	0.37668
2.9877	0.23706	0.37651
2.9881	0.23695	0.37633
2.9886	0.23683	0.37616
2.989	0.23672	0.37599
2.9894	0.2366	0.37582
2.9899	0.23649	0.37565
2.9903	0.23637	0.37547
2.9908	0.23626	0.3753
2.9912	0.23614	0.37513
2.9917	0.23603	0.37496
2.9921	0.23592	0.37479
2.9926	0.2358	0.37462
2.993	0.23569	0.37445
2.9934	0.23558	0.37428
2.9939	0.23546	0.37411
2.9943	0.23535	0.37394
2.9948	0.23524	0.37378
2.9952	0.23512	0.37361
2.9956	0.23501	0.37344
2.9961	0.2349	0.37327
2.9965	0.23479	0.3731
2.9969	0.23467	0.37294
2.9974	0.23456	0.37277
2.9978	0.23445	0.3726
2.9983	0.23434	0.37243
2.9987	0.23423	0.37227
2.9991	0.23412	0.3721
2.9996	0.23401	0.37193
3	0.23389	0.37177
3.0004	0.23378	0.3716
3.0009	0.23367	0.37144
3.0013	0.23356	0.37127
3.0017	0.23345	0.37111
3.0022	0.23334	0.37094
3.0026	0.23323	0.37078
3.003	0.23312	0.37061
3.0035	0.23301	0.37045
3.0039	0.2329	0.37029
3.0043	0.23279	0.37012
3.0048	0.23268	0.36996
3.0052	0.23258	0.3698
3.0056	0.23247	0.36963
3.006	0.23236	0.36947
3.0065	0.23225	0.36931
3.0069	0.23214	0.36915
3.0073	0.23203	0.36899
3.0077	0.23192	0.36882
3.0082	0.23182	0.36866
3.0086	0.23171	0.3685
3.009	0.2316	0.36834
3.0095	0.23149	0.36818
3.0099	0.23139	0.36802
3.0103	0.23128	0.36786
3.0107	0.23117	0.3677
3.0111	0.23107	0.36754
3.0116	0.23096	0.36738
3.012	0.23085	0.36722
3.0124	0.23075	0.36706
3.0128	0.23064	0.3669
3.0133	0.23053	0.36674
3.0137	0.23043	0.36658
3.0141	0.23032	0.36643
3.0145	0.23022	0.36627
3.0149	0.23011	0.36611
3.0154	0.23001	0.36595
3.0158	0.2299	0.3658
3.0162	0.2298	0.36564
3.0166	0.22969	0.36548
3.017	0.22959	0.36532
3.0175	0.22948	0.36517
3.0179	0.22938	0.36501
3.0183	0.22927	0.36486
3.0187	0.22917	0.3647
3.0191	0.22907	0.36454
3.0195	0.22896	0.36439
3.0199	0.22886	0.36423
3.0204	0.22875	0.36408
3.0208	0.22865	0.36392
3.0212	0.22855	0.36377
3.0216	0.22844	0.36361
3.022	0.22834	0.36346
3.0224	0.22824	0.36331
3.0228	0.22814	0.36315
3.0233	0.22803	0.363
3.0237	0.22793	0.36285
3.0241	0.22783	0.36269
3.0245	0.22773	0.36254
3.0249	0.22762	0.36239
3.0253	0.22752	0.36224
3.0257	0.22742	0.36208
3.0261	0.22732	0.36193
3.0265	0.22722	0.36178
3.0269	0.22712	0.36163
3.0273	0.22702	0.36148
3.0278	0.22692	0.36132
3.0282	0.22681	0.36117
3.0286	0.22671	0.36102
3.029	0.22661	0.36087
3.0294	0.22651	0.36072
3.0298	0.22641	0.36057
3.0302	0.22631	0.36042
3.0306	0.22621	0.36027
3.031	0.22611	0.36012
3.0314	0.22601	0.35997
3.0318	0.22591	0.35982
3.0322	0.22581	0.35967
3.0326	0.22571	0.35953
3.033	0.22562	0.35938
3.0334	0.22552	0.35923
3.0338	0.22542	0.35908
3.0342	0.22532	0.35893
3.0346	0.22522	0.35878
3.035	0.22512	0.35864
3.0354	0.22502	0.35849
3.0358	0.22492	0.35834
3.0362	0.22483	0.3582
3.0366	0.22473	0.35805
3.037	0.22463	0.3579
3.0374	0.22453	0.35776
3.0378	0.22444	0.35761
3.0382	0.22434	0.35746
3.0386	0.22424	0.35732
3.039	0.22414	0.35717
3.0394	0.22405	0.35703
3.0398	0.22395	0.35688
3.0402	0.22385	0.35674
3.0406	0.22376	0.35659
3.041	0.22366	0.35645
3.0414	0.22356	0.3563
3.0418	0.22347	0.35616
3.0422	0.22337	0.35601
3.0426	0.22328	0.35587
3.043	0.22318	0.35573
3.0434	0.22308	0.35558
3.0438	0.22299	0.35544
3.0441	0.22289	0.3553
3.0445	0.2228	0.35515
3.0449	0.2227	0.35501
3.0453	0.22261	0.35487
3.0457	0.22251	0.35472
3.0461	0.22242	0.35458
3.0465	0.22232	0.35444
3.0469	0.22223	0.3543
3.0473	0.22213	0.35416
3.0477	0.22204	0.35402
3.0481	0.22194	0.35387
3.0484	0.22185	0.35373
3.0488	0.22176	0.35359
3.0492	0.22166	0.35345
3.0496	0.22157	0.35331
3.05	0.22148	0.35317
3.0504	0.22138	0.35303
3.0508	0.22129	0.35289
3.0512	0.2212	0.35275
3.0515	0.2211	0.35261
3.0519	0.22101	0.35247
3.0523	0.22092	0.35233
3.0527	0.22082	0.35219
3.0531	0.22073	0.35205
3.0535	0.22064	0.35191
3.0538	0.22055	0.35178
3.0542	0.22045	0.35164
3.0546	0.22036	0.3515
3.055	0.22027	0.35136
3.0554	0.22018	0.35122
3.0558	0.22009	0.35109
3.0561	0.21999	0.35095
3.0565	0.2199	0.35081
3.0569	0.21981	0.35067
3.0573	0.21972	0.35054
3.0577	0.21963	0.3504
3.058	0.21954	0.35026
3.0584	0.21945	0.35013
3.0588	0.21936	0.34999
3.0592	0.21926	0.34985
3.0596	0.21917	0.34972
3.0599	0.21908	0.34958
3.0603	0.21899	0.34945
3.0607	0.2189	0.34931
3.0611	0.21881	0.34917
3.0615	0.21872	0.34904
3.0618	0.21863	0.3489
3.0622	0.21854	0.34877
3.0626	0.21845	0.34864
3.063	0.21836	0.3485
3.0633	0.21827	0.34837
3.0637	0.21818	0.34823
3.0641	0.2181	0.3481
3.0645	0.21801	0.34796
3.0648	0.21792	0.34783
3.0652	0.21783	0.3477
3.0656	0.21774	0.34756
3.066	0.21765	0.34743
3.0663	0.21756	0.3473
3.0667	0.21747	0.34716
3.0671	0.21739	0.34703
3.0674	0.2173	0.3469
3.0678	0.21721	0.34677
3.0682	0.21712	0.34664
3.0686	0.21703	0.3465
3.0689	0.21695	0.34637
3.0693	0.21686	0.34624
3.0697	0.21677	0.34611
3.07	0.21668	0.34598
3.0704	0.2166	0.34585
3.0708	0.21651	0.34571
3.0711	0.21642	0.34558
3.0715	0.21633	0.34545
3.0719	0.21625	0.34532
3.0722	0.21616	0.34519
3.0726	0.21607	0.34506
3.073	0.21599	0.34493
3.0734	0.2159	0.3448
3.0737	0.21581	0.34467
3.0741	0.21573	0.34454
3.0745	0.21564	0.34441
3.0748	0.21556	0.34428
3.0752	0.21547	0.34415
3.0755	0.21538	0.34403
3.0759	0.2153	0.3439
3.0763	0.21521	0.34377
3.0766	0.21513	0.34364
3.077	0.21504	0.34351
3.0774	0.21496	0.34338
3.0777	0.21487	0.34325
3.0781	0.21479	0.34313
3.0785	0.2147	0.343
3.0788	0.21462	0.34287
3.0792	0.21453	0.34274
3.0795	0.21445	0.34262
3.0799	0.21436	0.34249
3.0803	0.21428	0.34236
3.0806	0.21419	0.34224
3.081	0.21411	0.34211
3.0813	0.21402	0.34198
3.0817	0.21394	0.34186
3.0821	0.21386	0.34173
3.0824	0.21377	0.3416
3.0828	0.21369	0.34148
3.0831	0.21361	0.34135
3.0835	0.21352	0.34123
3.0839	0.21344	0.3411
3.0842	0.21336	0.34098
3.0846	0.21327	0.34085
3.0849	0.21319	0.34073
3.0853	0.21311	0.3406
3.0856	0.21302	0.34048
3.086	0.21294	0.34035
3.0864	0.21286	0.34023
3.0867	0.21277	0.3401
3.0871	0.21269	0.33998
3.0874	0.21261	0.33986
3.0878	0.21253	0.33973
3.0881	0.21245	0.33961
3.0885	0.21236	0.33948
3.0888	0.21228	0.33936
3.0892	0.2122	0.33924
3.0896	0.21212	0.33911
3.0899	0.21204	0.33899
3.0903	0.21195	0.33887
3.0906	0.21187	0.33875
3.091	0.21179	0.33862
3.0913	0.21171	0.3385
3.0917	0.21163	0.33838
3.092	0.21155	0.33826
3.0924	0.21147	0.33814
3.0927	0.21138	0.33801
3.0931	0.2113	0.33789
3.0934	0.21122	0.33777
3.0938	0.21114	0.33765
3.0941	0.21106	0.33753
3.0945	0.21098	0.33741
3.0948	0.2109	0.33729
3.0952	0.21082	0.33716
3.0955	0.21074	0.33704
3.0959	0.21066	0.33692
3.0962	0.21058	0.3368
3.0966	0.2105	0.33668
3.0969	0.21042	0.33656
3.0973	0.21034	0.33644
3.0976	0.21026	0.33632
3.098	0.21018	0.3362
3.0983	0.2101	0.33608
3.0986	0.21002	0.33596
3.099	0.20994	0.33584
3.0993	0.20986	0.33573
3.0997	0.20979	0.33561
3.1	0.20971	0.33549
3.1004	0.20963	0.33537
3.1007	0.20955	0.33525
3.1011	0.20947	0.33513
3.1014	0.20939	0.33501
3.1017	0.20931	0.3349
3.1021	0.20923	0.33478
3.1024	0.20916	0.33466
3.1028	0.20908	0.33454
3.1031	0.209	0.33442
3.1035	0.20892	0.33431
3.1038	0.20884	0.33419
3.1041	0.20877	0.33407
3.1045	0.20869	0.33395
3.1048	0.20861	0.33384
3.1052	0.20853	0.33372
3.1055	0.20845	0.3336
3.1059	0.20838	0.33349
3.1062	0.2083	0.33337
3.1065	0.20822	0.33325
3.1069	0.20815	0.33314
3.1072	0.20807	0.33302
3.1075	0.20799	0.33291
3.1079	0.20791	0.33279
3.1082	0.20784	0.33268
3.1086	0.20776	0.33256
3.1089	0.20768	0.33244
3.1092	0.20761	0.33233
3.1096	0.20753	0.33221
3.1099	0.20745	0.3321
3.1103	0.20738	0.33198
3.1106	0.2073	0.33187
3.1109	0.20723	0.33175
3.1113	0.20715	0.33164
3.1116	0.20707	0.33153
3.1119	0.207	0.33141
3.1123	0.20692	0.3313
3.1126	0.20685	0.33118
3.1129	0.20677	0.33107
3.1133	0.2067	0.33096
3.1136	0.20662	0.33084
3.1139	0.20655	0.33073
3.1143	0.20647	0.33062
3.1146	0.20639	0.3305
3.1149	0.20632	0.33039
3.1153	0.20624	0.33028
3.1156	0.20617	0.33016
3.1159	0.20609	0.33005
3.1163	0.20602	0.32994
3.1166	0.20595	0.32983
3.1169	0.20587	0.32971
3.1173	0.2058	0.3296
3.1176	0.20572	0.32949
3.1179	0.20565	0.32938
3.1183	0.20557	0.32926
3.1186	0.2055	0.32915
3.1189	0.20543	0.32904
3.1193	0.20535	0.32893
3.1196	0.20528	0.32882
3.1199	0.2052	0.32871
3.1202	0.20513	0.3286
3.1206	0.20506	0.32849
3.1209	0.20498	0.32837
3.1212	0.20491	0.32826
3.1216	0.20484	0.32815
3.1219	0.20476	0.32804
3.1222	0.20469	0.32793
3.1225	0.20462	0.32782
3.1229	0.20454	0.32771
3.1232	0.20447	0.3276
3.1235	0.2044	0.32749
3.1239	0.20432	0.32738
3.1242	0.20425	0.32727
3.1245	0.20418	0.32716
3.1248	0.20411	0.32705
3.1252	0.20403	0.32694
3.1255	0.20396	0.32683
3.1258	0.20389	0.32673
3.1261	0.20382	0.32662
3.1265	0.20374	0.32651
3.1268	0.20367	0.3264
3.1271	0.2036	0.32629
3.1274	0.20353	0.32618
3.1278	0.20346	0.32607
3.1281	0.20338	0.32596
3.1284	0.20331	0.32586
3.1287	0.20324	0.32575
3.129	0.20317	0.32564
3.1294	0.2031	0.32553
3.1297	0.20303	0.32543
3.13	0.20295	0.32532
3.1303	0.20288	0.32521
3.1307	0.20281	0.3251
3.131	0.20274	0.325
3.1313	0.20267	0.32489
3.1316	0.2026	0.32478
3.1319	0.20253	0.32467
3.1323	0.20246	0.32457
3.1326	0.20239	0.32446
3.1329	0.20232	0.32435
3.1332	0.20225	0.32425
3.1335	0.20218	0.32414
3.1339	0.2021	0.32404
3.1342	0.20203	0.32393
3.1345	0.20196	0.32382
3.1348	0.20189	0.32372
3.1351	0.20182	0.32361
3.1355	0.20175	0.32351
3.1358	0.20168	0.3234
3.1361	0.20161	0.3233
3.1364	0.20154	0.32319
3.1367	0.20147	0.32308
3.137	0.2014	0.32298
3.1374	0.20133	0.32287
3.1377	0.20127	0.32277
3.138	0.2012	0.32267
3.1383	0.20113	0.32256
3.1386	0.20106	0.32246
3.1389	0.20099	0.32235
3.1392	0.20092	0.32225
3.1396	0.20085	0.32214
3.1399	0.20078	0.32204
3.1402	0.20071	0.32194
3.1405	0.20064	0.32183
3.1408	0.20057	0.32173
3.1411	0.20051	0.32162
3.1414	0.20044	0.32152
3.1418	0.20037	0.32142
3.1421	0.2003	0.32131
3.1424	0.20023	0.32121
3.1427	0.20016	0.32111
3.143	0.2001	0.321
3.1433	0.20003	0.3209
3.1436	0.19996	0.3208
3.144	0.19989	0.3207
3.1443	0.19982	0.32059
3.1446	0.19975	0.32049
3.1449	0.19969	0.32039
3.1452	0.19962	0.32029
3.1455	0.19955	0.32018
3.1458	0.19948	0.32008
3.1461	0.19942	0.31998
3.1464	0.19935	0.31988
3.1467	0.19928	0.31978
3.1471	0.19921	0.31967
3.1474	0.19915	0.31957
3.1477	0.19908	0.31947
3.148	0.19901	0.31937
3.1483	0.19895	0.31927
3.1486	0.19888	0.31917
3.1489	0.19881	0.31907
3.1492	0.19874	0.31897
3.1495	0.19868	0.31887
3.1498	0.19861	0.31876
3.1501	0.19854	0.31866
3.1504	0.19848	0.31856
3.1508	0.19841	0.31846
3.1511	0.19835	0.31836
3.1514	0.19828	0.31826
3.1517	0.19821	0.31816
3.152	0.19815	0.31806
3.1523	0.19808	0.31796
3.1526	0.19801	0.31786
3.1529	0.19795	0.31776
3.1532	0.19788	0.31766
3.1535	0.19782	0.31756
3.1538	0.19775	0.31746
3.1541	0.19768	0.31737
3.1544	0.19762	0.31727
3.1547	0.19755	0.31717
3.155	0.19749	0.31707
3.1553	0.19742	0.31697
3.1556	0.19736	0.31687
3.1559	0.19729	0.31677
3.1562	0.19723	0.31667
3.1565	0.19716	0.31657
3.1569	0.1971	0.31648
3.1572	0.19703	0.31638
3.1575	0.19697	0.31628
3.1578	0.1969	0.31618
3.1581	0.19684	0.31608
3.1584	0.19677	0.31599
3.1587	0.19671	0.31589
3.159	0.19664	0.31579
3.1593	0.19658	0.31569
3.1596	0.19651	0.3156
3.1599	0.19645	0.3155
3.1602	0.19638	0.3154
3.1605	0.19632	0.3153
3.1608	0.19626	0.31521
3.1611	0.19619	0.31511
3.1614	0.19613	0.31501
3.1617	0.19606	0.31492
3.162	0.196	0.31482
3.1623	0.19594	0.31472
3.1626	0.19587	0.31463
3.1629	0.19581	0.31453
3.1632	0.19574	0.31443
3.1635	0.19568	0.31434
3.1638	0.19562	0.31424
3.1641	0.19555	0.31414
3.1644	0.19549	0.31405
3.1647	0.19543	0.31395
3.1649	0.19536	0.31386
3.1652	0.1953	0.31376
3.1655	0.19524	0.31367
3.1658	0.19517	0.31357
3.1661	0.19511	0.31347
3.1664	0.19505	0.31338
3.1667	0.19498	0.31328
3.167	0.19492	0.31319
3.1673	0.19486	0.31309
3.1676	0.1948	0.313
3.1679	0.19473	0.3129
3.1682	0.19467	0.31281
3.1685	0.19461	0.31272
3.1688	0.19454	0.31262
3.1691	0.19448	0.31253
3.1694	0.19442	0.31243
3.1697	0.19436	0.31234
3.17	0.19429	0.31224
3.1703	0.19423	0.31215
3.1706	0.19417	0.31206
3.1708	0.19411	0.31196
3.1711	0.19405	0.31187
3.1714	0.19398	0.31177
3.1717	0.19392	0.31168
3.172	0.19386	0.31159
3.1723	0.1938	0.31149
3.1726	0.19374	0.3114
3.1729	0.19368	0.31131
3.1732	0.19361	0.31121
3.1735	0.19355	0.31112
3.1738	0.19349	0.31103
3.1741	0.19343	0.31093
3.1744	0.19337	0.31084
3.1746	0.19331	0.31075
3.1749	0.19325	0.31066
3.1752	0.19318	0.31056
3.1755	0.19312	0.31047
3.1758	0.19306	0.31038
3.1761	0.193	0.31029
3.1764	0.19294	0.31019
3.1767	0.19288	0.3101
3.177	0.19282	0.31001
3.1772	0.19276	0.30992
3.1775	0.1927	0.30983
3.1778	0.19264	0.30974
3.1781	0.19258	0.30964
3.1784	0.19251	0.30955
3.1787	0.19245	0.30946
3.179	0.19239	0.30937
3.1793	0.19233	0.30928
3.1796	0.19227	0.30919
3.1798	0.19221	0.3091
3.1801	0.19215	0.309
3.1804	0.19209	0.30891
3.1807	0.19203	0.30882
3.181	0.19197	0.30873
3.1813	0.19191	0.30864
3.1816	0.19185	0.30855
3.1818	0.19179	0.30846
3.1821	0.19173	0.30837
3.1824	0.19167	0.30828
3.1827	0.19161	0.30819
3.183	0.19155	0.3081
3.1833	0.19149	0.30801
3.1836	0.19144	0.30792
3.1838	0.19138	0.30783
3.1841	0.19132	0.30774
3.1844	0.19126	0.30765
3.1847	0.1912	0.30756
3.185	0.19114	0.30747
3.1853	0.19108	0.30738
3.1855	0.19102	0.30729
3.1858	0.19096	0.3072
3.1861	0.1909	0.30711
3.1864	0.19084	0.30702
3.1867	0.19078	0.30693
3.187	0.19073	0.30685
3.1872	0.19067	0.30676
3.1875	0.19061	0.30667
3.1878	0.19055	0.30658
3.1881	0.19049	0.30649
3.1884	0.19043	0.3064
3.1886	0.19037	0.30631
3.1889	0.19032	0.30622
3.1892	0.19026	0.30614
3.1895	0.1902	0.30605
3.1898	0.19014	0.30596
3.1901	0.19008	0.30587
3.1903	0.19002	0.30578
3.1906	0.18997	0.3057
3.1909	0.18991	0.30561
3.1912	0.18985	0.30552
3.1915	0.18979	0.30543
3.1917	0.18973	0.30534
3.192	0.18968	0.30526
3.1923	0.18962	0.30517
3.1926	0.18956	0.30508
3.1928	0.1895	0.305
3.1931	0.18945	0.30491
3.1934	0.18939	0.30482
3.1937	0.18933	0.30473
3.194	0.18927	0.30465
3.1942	0.18922	0.30456
3.1945	0.18916	0.30447
3.1948	0.1891	0.30439
3.1951	0.18904	0.3043
3.1953	0.18899	0.30421
3.1956	0.18893	0.30413
3.1959	0.18887	0.30404
3.1962	0.18882	0.30395
3.1965	0.18876	0.30387
3.1967	0.1887	0.30378
3.197	0.18865	0.3037
3.1973	0.18859	0.30361
3.1976	0.18853	0.30352
3.1978	0.18848	0.30344
3.1981	0.18842	0.30335
3.1984	0.18836	0.30327
3.1987	0.18831	0.30318
3.1989	0.18825	0.3031
3.1992	0.18819	0.30301
3.1995	0.18814	0.30293
3.1998	0.18808	0.30284
3.2	0.18802	0.30275
3.2003	0.18797	0.30267
3.2006	0.18791	0.30258
3.2009	0.18786	0.3025
3.2011	0.1878	0.30241
3.2014	0.18774	0.30233
3.2017	0.18769	0.30225
3.2019	0.18763	0.30216
3.2022	0.18758	0.30208
3.2025	0.18752	0.30199
3.2028	0.18746	0.30191
3.203	0.18741	0.30182
3.2033	0.18735	0.30174
3.2036	0.1873	0.30165
3.2038	0.18724	0.30157
3.2041	0.18719	0.30149
3.2044	0.18713	0.3014
3.2047	0.18708	0.30132
3.2049	0.18702	0.30123
3.2052	0.18697	0.30115
3.2055	0.18691	0.30107
3.2057	0.18685	0.30098
3.206	0.1868	0.3009
3.2063	0.18674	0.30082
3.2066	0.18669	0.30073
3.2068	0.18663	0.30065
3.2071	0.18658	0.30057
3.2074	0.18652	0.30048
3.2076	0.18647	0.3004
3.2079	0.18642	0.30032
3.2082	0.18636	0.30023
3.2084	0.18631	0.30015
3.2087	0.18625	0.30007
3.209	0.1862	0.29999
3.2092	0.18614	0.2999
3.2095	0.18609	0.29982
3.2098	0.18603	0.29974
3.2101	0.18598	0.29966
3.2103	0.18592	0.29957
3.2106	0.18587	0.29949
3.2109	0.18582	0.29941
3.2111	0.18576	0.29933
3.2114	0.18571	0.29924
3.2117	0.18565	0.29916
3.2119	0.1856	0.29908
3.2122	0.18555	0.299
3.2125	0.18549	0.29892
3.2127	0.18544	0.29884
3.213	0.18538	0.29875
3.2133	0.18533	0.29867
3.2135	0.18528	0.29859
3.2138	0.18522	0.29851
3.214	0.18517	0.29843
3.2143	0.18512	0.29835
3.2146	0.18506	0.29827
3.2148	0.18501	0.29818
3.2151	0.18496	0.2981
3.2154	0.1849	0.29802
3.2156	0.18485	0.29794
3.2159	0.1848	0.29786
3.2162	0.18474	0.29778
3.2164	0.18469	0.2977
3.2167	0.18464	0.29762
3.217	0.18458	0.29754
3.2172	0.18453	0.29746
3.2175	0.18448	0.29738
3.2177	0.18442	0.2973
3.218	0.18437	0.29722
3.2183	0.18432	0.29714
3.2185	0.18426	0.29706
3.2188	0.18421	0.29698
3.2191	0.18416	0.2969
3.2193	0.18411	0.29682
3.2196	0.18405	0.29674
3.2198	0.184	0.29666
3.2201	0.18395	0.29658
3.2204	0.1839	0.2965
3.2206	0.18384	0.29642
3.2209	0.18379	0.29634
3.2212	0.18374	0.29626
3.2214	0.18369	0.29618
3.2217	0.18363	0.2961
3.2219	0.18358	0.29602
3.2222	0.18353	0.29594
3.2225	0.18348	0.29586
3.2227	0.18343	0.29578
3.223	0.18337	0.29571
3.2232	0.18332	0.29563
3.2235	0.18327	0.29555
3.2238	0.18322	0.29547
3.224	0.18317	0.29539
3.2243	0.18311	0.29531
3.2245	0.18306	0.29523
3.2248	0.18301	0.29516
3.2251	0.18296	0.29508
3.2253	0.18291	0.295
3.2256	0.18286	0.29492
3.2258	0.1828	0.29484
3.2261	0.18275	0.29476
3.2263	0.1827	0.29469
3.2266	0.18265	0.29461
3.2269	0.1826	0.29453
3.2271	0.18255	0.29445
3.2274	0.1825	0.29437
3.2276	0.18245	0.2943
3.2279	0.18239	0.29422
3.2281	0.18234	0.29414
3.2284	0.18229	0.29406
3.2287	0.18224	0.29399
3.2289	0.18219	0.29391
3.2292	0.18214	0.29383
3.2294	0.18209	0.29375
3.2297	0.18204	0.29368
3.2299	0.18199	0.2936
3.2302	0.18194	0.29352
3.2304	0.18188	0.29345
3.2307	0.18183	0.29337
3.231	0.18178	0.29329
3.2312	0.18173	0.29322
3.2315	0.18168	0.29314
3.2317	0.18163	0.29306
3.232	0.18158	0.29299
3.2322	0.18153	0.29291
3.2325	0.18148	0.29283
3.2327	0.18143	0.29276
3.233	0.18138	0.29268
3.2333	0.18133	0.2926
3.2335	0.18128	0.29253
3.2338	0.18123	0.29245
3.234	0.18118	0.29238
3.2343	0.18113	0.2923
3.2345	0.18108	0.29222
3.2348	0.18103	0.29215
3.235	0.18098	0.29207
3.2353	0.18093	0.292
3.2355	0.18088	0.29192
3.2358	0.18083	0.29184
3.236	0.18078	0.29177
3.2363	0.18073	0.29169
3.2365	0.18068	0.29162
3.2368	0.18063	0.29154
3.237	0.18058	0.29147
3.2373	0.18053	0.29139
3.2375	0.18048	0.29132
3.2378	0.18043	0.29124
3.238	0.18038	0.29117
3.2383	0.18033	0.29109
3.2385	0.18028	0.29102
3.2388	0.18023	0.29094
3.239	0.18019	0.29087
3.2393	0.18014	0.29079
3.2395	0.18009	0.29072
3.2398	0.18004	0.29064
3.24	0.17999	0.29057
3.2403	0.17994	0.29049
3.2405	0.17989	0.29042
3.2408	0.17984	0.29034
3.241	0.17979	0.29027
3.2413	0.17974	0.2902
3.2415	0.1797	0.29012
3.2418	0.17965	0.29005
3.242	0.1796	0.28997
3.2423	0.17955	0.2899
3.2425	0.1795	0.28983
3.2428	0.17945	0.28975
3.243	0.1794	0.28968
3.2433	0.17935	0.2896
3.2435	0.17931	0.28953
3.2438	0.17926	0.28946
3.244	0.17921	0.28938
3.2443	0.17916	0.28931
3.2445	0.17911	0.28924
3.2448	0.17906	0.28916
3.245	0.17902	0.28909
3.2453	0.17897	0.28902
3.2455	0.17892	0.28894
3.2458	0.17887	0.28887
3.246	0.17882	0.2888
3.2463	0.17877	0.28872
3.2465	0.17873	0.28865
3.2467	0.17868	0.28858
3.247	0.17863	0.2885
3.2472	0.17858	0.28843
3.2475	0.17853	0.28836
3.2477	0.17849	0.28829
3.248	0.17844	0.28821
3.2482	0.17839	0.28814
3.2485	0.17834	0.28807
3.2487	0.1783	0.288
3.249	0.17825	0.28792
3.2492	0.1782	0.28785
3.2494	0.17815	0.28778
3.2497	0.17811	0.28771
3.2499	0.17806	0.28764
3.2502	0.17801	0.28756
3.2504	0.17796	0.28749
3.2507	0.17792	0.28742
3.2509	0.17787	0.28735
3.2512	0.17782	0.28728
3.2514	0.17777	0.2872
3.2516	0.17773	0.28713
3.2519	0.17768	0.28706
3.2521	0.17763	0.28699
3.2524	0.17759	0.28692
3.2526	0.17754	0.28685
3.2529	0.17749	0.28677
3.2531	0.17744	0.2867
3.2533	0.1774	0.28663
3.2536	0.17735	0.28656
3.2538	0.1773	0.28649
3.2541	0.17726	0.28642
3.2543	0.17721	0.28635
3.2545	0.17716	0.28628
3.2548	0.17712	0.2862
3.255	0.17707	0.28613
3.2553	0.17702	0.28606
3.2555	0.17698	0.28599
3.2558	0.17693	0.28592
3.256	0.17688	0.28585
3.2562	0.17684	0.28578
3.2565	0.17679	0.28571
3.2567	0.17674	0.28564
3.257	0.1767	0.28557
3.2572	0.17665	0.2855
3.2574	0.17661	0.28543
3.2577	0.17656	0.28536
3.2579	0.17651	0.28529
3.2582	0.17647	0.28522
3.2584	0.17642	0.28515
3.2586	0.17637	0.28508
3.2589	0.17633	0.28501
3.2591	0.17628	0.28494
3.2594	0.17624	0.28487
3.2596	0.17619	0.2848
3.2598	0.17614	0.28473
3.2601	0.1761	0.28466
3.2603	0.17605	0.28459
3.2605	0.17601	0.28452
3.2608	0.17596	0.28445
3.261	0.17592	0.28438
3.2613	0.17587	0.28431
3.2615	0.17582	0.28424
3.2617	0.17578	0.28417
3.262	0.17573	0.2841
3.2622	0.17569	0.28403
3.2625	0.17564	0.28396
3.2627	0.1756	0.28389
3.2629	0.17555	0.28382
3.2632	0.17551	0.28375
3.2634	0.17546	0.28369
3.2636	0.17541	0.28362
3.2639	0.17537	0.28355
3.2641	0.17532	0.28348
3.2643	0.17528	0.28341
3.2646	0.17523	0.28334
3.2648	0.17519	0.28327
3.2651	0.17514	0.2832
3.2653	0.1751	0.28314
3.2655	0.17505	0.28307
3.2658	0.17501	0.283
3.266	0.17496	0.28293
3.2662	0.17492	0.28286
3.2665	0.17487	0.28279
3.2667	0.17483	0.28273
3.2669	0.17478	0.28266
3.2672	0.17474	0.28259
3.2674	0.17469	0.28252
3.2676	0.17465	0.28245
3.2679	0.17461	0.28239
3.2681	0.17456	0.28232
3.2683	0.17452	0.28225
3.2686	0.17447	0.28218
3.2688	0.17443	0.28211
3.269	0.17438	0.28205
3.2693	0.17434	0.28198
3.2695	0.17429	0.28191
3.2697	0.17425	0.28184
3.27	0.1742	0.28178
3.2702	0.17416	0.28171
3.2704	0.17412	0.28164
3.2707	0.17407	0.28157
3.2709	0.17403	0.28151
3.2711	0.17398	0.28144
3.2714	0.17394	0.28137
3.2716	0.1739	0.2813
3.2718	0.17385	0.28124
3.2721	0.17381	0.28117
3.2723	0.17376	0.2811
3.2725	0.17372	0.28104
3.2728	0.17368	0.28097
3.273	0.17363	0.2809
3.2732	0.17359	0.28084
3.2735	0.17354	0.28077
3.2737	0.1735	0.2807
3.2739	0.17346	0.28064
3.2742	0.17341	0.28057
3.2744	0.17337	0.2805
3.2746	0.17332	0.28044
3.2749	0.17328	0.28037
3.2751	0.17324	0.2803
3.2753	0.17319	0.28024
3.2755	0.17315	0.28017
3.2758	0.17311	0.28011
3.276	0.17306	0.28004
3.2762	0.17302	0.27997
3.2765	0.17298	0.27991
3.2767	0.17293	0.27984
3.2769	0.17289	0.27977
3.2772	0.17285	0.27971
3.2774	0.1728	0.27964
3.2776	0.17276	0.27958
3.2778	0.17272	0.27951
3.2781	0.17267	0.27945
3.2783	0.17263	0.27938
3.2785	0.17259	0.27931
3.2788	0.17254	0.27925
3.279	0.1725	0.27918
3.2792	0.17246	0.27912
3.2794	0.17242	0.27905
3.2797	0.17237	0.27899
3.2799	0.17233	0.27892
3.2801	0.17229	0.27886
3.2804	0.17224	0.27879
3.2806	0.1722	0.27873
3.2808	0.17216	0.27866
3.281	0.17212	0.2786
3.2813	0.17207	0.27853
3.2815	0.17203	0.27847
3.2817	0.17199	0.2784
3.2819	0.17195	0.27834
3.2822	0.1719	0.27827
3.2824	0.17186	0.27821
3.2826	0.17182	0.27814
3.2828	0.17178	0.27808
3.2831	0.17173	0.27801
3.2833	0.17169	0.27795
3.2835	0.17165	0.27788
3.2838	0.17161	0.27782
3.284	0.17156	0.27776
3.2842	0.17152	0.27769
3.2844	0.17148	0.27763
3.2847	0.17144	0.27756
3.2849	0.17139	0.2775
3.2851	0.17135	0.27743
3.2853	0.17131	0.27737
3.2856	0.17127	0.27731
3.2858	0.17123	0.27724
3.286	0.17118	0.27718
3.2862	0.17114	0.27711
3.2865	0.1711	0.27705
3.2867	0.17106	0.27699
3.2869	0.17102	0.27692
3.2871	0.17097	0.27686
3.2874	0.17093	0.27679
3.2876	0.17089	0.27673
3.2878	0.17085	0.27667
3.288	0.17081	0.2766
3.2882	0.17077	0.27654
3.2885	0.17072	0.27648
3.2887	0.17068	0.27641
3.2889	0.17064	0.27635
3.2891	0.1706	0.27629
3.2894	0.17056	0.27622
3.2896	0.17052	0.27616
3.2898	0.17047	0.2761
3.29	0.17043	0.27603
3.2903	0.17039	0.27597
3.2905	0.17035	0.27591
3.2907	0.17031	0.27584
3.2909	0.17027	0.27578
3.2911	0.17023	0.27572
3.2914	0.17019	0.27566
3.2916	0.17014	0.27559
3.2918	0.1701	0.27553
3.292	0.17006	0.27547
3.2923	0.17002	0.27541
3.2925	0.16998	0.27534
3.2927	0.16994	0.27528
3.2929	0.1699	0.27522
3.2931	0.16986	0.27515
3.2934	0.16982	0.27509
3.2936	0.16977	0.27503
3.2938	0.16973	0.27497
3.294	0.16969	0.27491
3.2942	0.16965	0.27484
3.2945	0.16961	0.27478
3.2947	0.16957	0.27472
3.2949	0.16953	0.27466
3.2951	0.16949	0.27459
3.2953	0.16945	0.27453
3.2956	0.16941	0.27447
3.2958	0.16937	0.27441
3.296	0.16933	0.27435
3.2962	0.16929	0.27428
3.2964	0.16925	0.27422
3.2967	0.1692	0.27416
3.2969	0.16916	0.2741
3.2971	0.16912	0.27404
3.2973	0.16908	0.27398
3.2975	0.16904	0.27391
3.2978	0.169	0.27385
3.298	0.16896	0.27379
3.2982	0.16892	0.27373
3.2984	0.16888	0.27367
3.2986	0.16884	0.27361
3.2989	0.1688	0.27355
3.2991	0.16876	0.27348
3.2993	0.16872	0.27342
3.2995	0.16868	0.27336
3.2997	0.16864	0.2733
3.2999	0.1686	0.27324
3.3002	0.16856	0.27318
3.3004	0.16852	0.27312
3.3006	0.16848	0.27306
3.3008	0.16844	0.273
[truncated: 98,001 more rows]

## Sheet: 6B
low CVs		high CVs
CV-control	CV-A+L	CV-control	CV-A+L
1.7938	1.4158	7.194	7.2534
1.7471	2.0353	5.5719	5.366
1.1321	0.98824	2.4813	3.7492
0.97517	1.396	4.0653	2.6925
1.3317	1.4167	3.6897	1.1018
1.1185	0.89651	4.8132	4.6623
1.7394	0.89131	6.5537	8.0237
1.4679	0.8552	5.1427	4.6889
1.2019	1.0758	2.1645	1.0115
1.3628	1.4152	3.1012	1.674
0.91574	2.5715	4.2367	2.1439
1.8689	1.434	8.3311	3.496
0.99409	1.0272	3.978	2.0435
1.957	1.6783	4.7604	2.7373
1.1004	1.0598	2.6089	3.898
1.2	0.96532	2.6894	1.16
1.0069	0.95592	4.6379	1.9648
1.3017	1.1859	4.313	1.5977
1.0174	1.1331	3.8931	1.4004
1.8687	1.1695	3.0066	3.4591
1.1399	0.95368	3.3403	6.6606
1.4128	0.80316	3.6244	2.0079
1.4617	1.2314	2.9828	2.7972
1.7156	1.126	2.6202	1.4435
1.3934	1.3454	5.5987	2.8059
1.3496	2.1025	2.1715	2.6721
1.3517	1.6873	4.608	3.3048
1.8592	2.0549	3.4	4.1872
1.5498	1.437	3.2689	2.2391
1.8068	1.8282	2.5684	1.4836
1.2374	1.0538	3.9127	3.6675
0.73838	1.9955	3.8417	6.0067
1.2925	1.1055	3.3754	3.1841
1.3783	2.1537	2.6854	1.2705
0.71014	1.4616	11.327	7.387
0.75661	1.3151	4.6371	4.1809
1.8797	2.0762	8.3095	2.8526
1.2846	2.4882	4.3394	3.8049
1.6575	0.84309	2.5397	2.0978
0.84151	1.1651	4.6361	3.0333
0.72828	1.1677	5.2944	4.0909
1.437	1.9012	5.2507	2.5905
0.99921	2.4934	5.4307	4.1423
1.1752	2.05	5.0734	4.4252
1.7575	2.1972	3.1917	3.5278
1.057	0.83475	2.8209	4.24
1.0698	1.1423	5.8986	1.6063
1.3331	1.2925	4.7069	4.0999
1.1232	2.1586	3.6264	3.2458
1.5077	2.2207	2.4951	1.6089
1.8552	1.6031	3.5479	4.3145
1.3659	1.8281	2.5493	3.333
1.1776	0.93657	3.2057	2.7491
0.6127	1.1216	2.8123	3.5289
0.83959	1.4658	2.0442	2.2213
1.2726	1.7331	3.1916	3.4218
1.7516	3.1238	3.1961	3.4398
0.62536	1.0269	4.6029	3.9863
0.82213	3.9909	3.7914	2.2666
1.7521	2.9085	2.6228	7.2738
1.7229	0.97167	3.8271	3.254
1.4409	1.2001	2.1917	2.9495
1.3764	1.4195	4.2909	5.1526
1.8451	2.5523	7.8804	2.8389
1.1082	1.3148	2.6775	3.5194
0.97307	1.1518	2.7973	3.7241
1.558	2.311	6.3969	5.5522
1.1453	1.3305	4.5026	5.1176
1.268	1.3081	4.4299	3.4897
1.6462	2.1766	3.2126	2.0704
1.6139	2.3747	5.7376	2.2288
1.2534	0.50536	6.8826	4.2333
1.4405	1.6848	4.0076	4.8727
1.9411	1.4369	2.5531	3.0691
1.4325	1.3655	2.0059	1.5624
1.0704	1.5258	2.217	3.2608
1.1829	1.8717	4.3572	5.3791
1.0269	0.61586	7.3457	10.595
1.4535	0.7244	3.0326	1.4434
1.5132	2.5143	3.3248	1.7876
1.0724	1.7364	5.0029	4.0683
1.5373	1.0978	5.9971	2.8047
1.3639	2.1184	3.1707	3.2386
0.88182	1.3485	2.5744	2.4502
1.1263	1.3573	2.9591	3.47
1.2723	1.934	3.0215	2.6753
1.2349	3.2967	5.7509	4.7093
1.7478	1.3486	3.4794	2.3208
1.3797	1.2825	4.5661	2.0957
		3.5949	4.5632
		3.1391	2.928
		2.178	1.9792
		3.7246	3.4488
		4.01	4.095
		3.7966	3.355
		2.8782	1.466
		4.4746	5.3791
		5.2486	6.3074
		5.6466	11.297
		3.2292	1.8237
		2.736	2.8571

## Sheet: 6C
low CVs		low CVs
control1	control2	control1	control2
2.0566	1.479	6.7124	6.8273
1.9081	1.5975	5.03	5.0028
1.0766	1.1329	2.5967	2.3759
1.0295	0.92024	2.7265	4.6353
1.1119	1.3268	3.6695	3.7108
1.098	1.0553	4.5408	4.5442
1.2966	1.8884	6.7341	5.8509
1.5135	1.409	5.0496	5.21
1.0983	1.2188	2.1305	2.1991
1.3463	1.38	3.0329	3.1367
0.90227	0.92824	4.2113	3.9173
1.7212	1.8356	8.6496	7.944
0.99742	0.99052	3.9545	3.9793
1.9535	1.7475	4.9586	4.3452
1.0805	1.1211	2.5776	2.4982
1.2182	1.179	2.4795	2.9069
1.0565	0.95413	4.6796	4.5968
1.3739	1.2295	4.515	4.0904
1.0208	0.99334	4.0533	2.6802
1.9686	1.5019	2.7831	2.5117
1.0857	1.07	2.158	3.9236
1.2766	1.4587	4.1803	3.0389
1.0715	1.5343	3.1052	2.7033
1.5227	1.7959	1.8847	2.9552
1.4054	1.3817	5.1063	5.2178
1.3088	1.3611	2.2293	2.1023
1.3691	1.3339	4.6301	4.5864
1.906	1.8035	3.373	3.3182
1.6089	1.4786	2.1545	3.7449
1.8715	1.7457	2.7024	2.4316
1.2005	1.1573	3.9554	3.4879
0.73219	0.74468	3.9109	3.7207
1.2817	1.2596	2.8488	3.5059
1.3961	1.3556	2.4197	2.3453
0.69952	0.72059	10.422	11.081
0.78018	0.73297	4.4739	4.8134
2.0731	1.7159	6.4639	8.0416
1.2827	1.2863	4.3555	4.3036
1.6872	1.6279	1.852	2.8423
0.84128	0.84185	4.1847	5.0326
0.73531	0.72081	4.7112	5.8038
1.3473	1.4581	3.7773	5.4995
0.99756	1.001	5.3076	4.9803
1.1929	1.1578	4.6612	4.6603
1.7107	1.8057	2.8398	3.325
1.0284	1.0079	2.5036	2.6049
1.0608	1.0611	2.5526	7.1755
1.3252	1.3375	4.4756	4.4753
1.1322	1.084	3.9083	3.3696
1.4902	1.4802	2.4924	2.3434
1.9107	1.6737	3.3846	3.545
1.3557	1.3434	2.5338	2.3132
1.2081	1.1347	4.1735	3.1864
0.61263	0.61051	2.8157	2.7914
0.78955	0.882	2.0785	2.0108
1.254	1.2899	3.3675	2.7507
1.7778	1.7019	3.3399	3.0076
0.62176	0.61795	4.7019	4.4697
0.81841	0.8252	4.1478	3.1058
1.7631	1.7412	2.3336	2.8534
1.7641	1.6702	3.4392	3.6933
1.5641	1.2589	2.2357	2.1372
1.339	1.4162	4.2748	4.3076
1.7891	1.9063	8.7836	6.9611
1.1212	1.0933	2.6856	2.6555
0.97989	0.95308	2.7468	2.8014
1.512	1.5054	6.3184	5.9359
1.1537	1.1366	4.5825	3.9936
1.2792	1.2564	3.5509	4.4658
1.5922	1.7003	3.3328	3.0837
1.5299	1.7	12.702	3.427
1.2376	1.1471	7.2626	5.3366
1.4326	1.4289	2.953	4.2697
1.8741	2.0124	2.5138	2.3255
1.1883	1.5284	2.0862	1.8889
1.0669	1.0586	2.1537	2.2393
1.135	1.2322	4.6423	4.054
1.0197	1.005	7.0808	7.5752
1.2617	1.3587	3.2879	2.7915
1.5403	1.4763	3.134	3.2968
1.0357	1.0332	4.8404	5.019
1.4069	1.6501	5.8876	5.8526
1.5003	1.1622	2.8255	3.3916
0.93888	0.79114	2.5014	2.654
1.1399	1.1127	2.8495	2.7739
1.2631	1.2782	2.9642	3.0686
1.1766	1.2912	5.2957	5.454
1.7755	1.6674	3.81	3.0674
1.5166	1.1783	5.0174	3.9659
		3.5065	3.3742
		3.2334	3.048
		2.0964	2.2506
		3.6856	3.4162
		4.0068	4.01
		3.4818	3.7921
		3.076	2.6564
		4.3303	4.6349
		5.3288	4.9457
		5.6272	5.6546
		3.1792	3.2825
		1.975	3.8625

## Sheet: 6D
low CVs		high CVs		high CVs with P300		high CVs with NfkB
CV-control	CV-A+L	CV-control	CV-A+L	CV-control	CV-A+L	CV-control	CV-A+L
1.7938	1.4158	7.194	7.2534	5.5719	5.366	5.5719	5.366
1.7471	2.0353	5.5719	5.366	2.4813	3.7492	3.6897	1.1018
1.1321	0.98824	2.4813	3.7492	3.6897	1.1018	6.5537	8.0237
0.97517	1.396	4.0653	2.6925	6.5537	8.0237	5.1427	4.6889
1.3317	1.4167	3.6897	1.1018	5.1427	4.6889	2.1645	1.0115
1.1185	0.89651	4.8132	4.6623	2.1645	1.0115	4.7604	2.7373
1.7394	0.89131	6.5537	8.0237	8.3311	3.496	2.6894	1.16
1.4679	0.8552	5.1427	4.6889	3.978	2.0435	4.6379	1.9648
1.2019	1.0758	2.1645	1.0115	4.7604	2.7373	4.313	1.5977
1.3628	1.4152	3.1012	1.674	2.6894	1.16	3.8931	1.4004
0.91574	2.5715	4.2367	2.1439	4.6379	1.9648	3.3403	6.6606
1.8689	1.434	8.3311	3.496	4.313	1.5977	3.6244	2.0079
0.99409	1.0272	3.978	2.0435	3.8931	1.4004	2.9828	2.7972
1.957	1.6783	4.7604	2.7373	3.3403	6.6606	2.6202	1.4435
1.1004	1.0598	2.6089	3.898	3.6244	2.0079	4.608	3.3048
1.2	0.96532	2.6894	1.16	2.9828	2.7972	3.2689	2.2391
1.0069	0.95592	4.6379	1.9648	2.6202	1.4435	2.5684	1.4836
1.3017	1.1859	4.313	1.5977	2.1715	2.6721	3.8417	6.0067
1.0174	1.1331	3.8931	1.4004	4.608	3.3048	2.6854	1.2705
1.8687	1.1695	3.0066	3.4591	3.2689	2.2391	4.6371	4.1809
1.1399	0.95368	3.3403	6.6606	2.5684	1.4836	8.3095	2.8526
1.4128	0.80316	3.6244	2.0079	3.8417	6.0067	2.5397	2.0978
1.4617	1.2314	2.9828	2.7972	2.6854	1.2705	4.6361	3.0333
1.7156	1.126	2.6202	1.4435	11.327	7.387	5.2944	4.0909
1.3934	1.3454	5.5987	2.8059	4.6371	4.1809	5.2507	2.5905
1.3496	2.1025	2.1715	2.6721	8.3095	2.8526	5.4307	4.1423
1.3517	1.6873	4.608	3.3048	4.3394	3.8049	3.1917	3.5278
1.8592	2.0549	3.4	4.1872	2.5397	2.0978	2.8209	4.24
1.5498	1.437	3.2689	2.2391	4.6361	3.0333	5.8986	1.6063
1.8068	1.8282	2.5684	1.4836	5.2944	4.0909	2.4951	1.6089
1.2374	1.0538	3.9127	3.6675	5.2507	2.5905	3.5479	4.3145
0.73838	1.9955	3.8417	6.0067	5.4307	4.1423	3.2057	2.7491
1.2925	1.1055	3.3754	3.1841	3.1917	3.5278	2.8123	3.5289
1.3783	2.1537	2.6854	1.2705	2.8209	4.24	2.0442	2.2213
0.71014	1.4616	11.327	7.387	5.8986	1.6063	3.1961	3.4398
0.75661	1.3151	4.6371	4.1809	2.4951	1.6089	4.6029	3.9863
1.8797	2.0762	8.3095	2.8526	3.5479	4.3145	3.7914	2.2666
1.2846	2.4882	4.3394	3.8049	2.5493	3.333	3.8271	3.254
1.6575	0.84309	2.5397	2.0978	3.2057	2.7491	4.2909	5.1526
0.84151	1.1651	4.6361	3.0333	2.8123	3.5289	7.8804	2.8389
0.72828	1.1677	5.2944	4.0909	2.0442	2.2213	2.6775	3.5194
1.437	1.9012	5.2507	2.5905	3.1961	3.4398	2.7973	3.7241
0.99921	2.4934	5.4307	4.1423	4.6029	3.9863	3.2126	2.0704
1.1752	2.05	5.0734	4.4252	3.7914	2.2666	4.0076	4.8727
1.7575	2.1972	3.1917	3.5278	2.6228	7.2738	2.5531	3.0691
1.057	0.83475	2.8209	4.24	3.8271	3.254	2.0059	1.5624
1.0698	1.1423	5.8986	1.6063	2.1917	2.9495	7.3457	10.595
1.3331	1.2925	4.7069	4.0999	4.2909	5.1526	3.0326	1.4434
1.1232	2.1586	3.6264	3.2458	7.8804	2.8389	3.3248	1.7876
1.5077	2.2207	2.4951	1.6089	2.6775	3.5194	5.0029	4.0683
1.8552	1.6031	3.5479	4.3145	2.7973	3.7241	5.9971	2.8047
1.3659	1.8281	2.5493	3.333	3.2126	2.0704	3.1707	3.2386
1.1776	0.93657	3.2057	2.7491	4.0076	4.8727	2.5744	2.4502
0.6127	1.1216	2.8123	3.5289	2.5531	3.0691	3.0215	2.6753
0.83959	1.4658	2.0442	2.2213	2.0059	1.5624	3.4794	2.3208
1.2726	1.7331	3.1916	3.4218	7.3457	10.595	3.1391	2.928
1.7516	3.1238	3.1961	3.4398	3.0326	1.4434	2.178	1.9792
0.62536	1.0269	4.6029	3.9863	3.3248	1.7876	4.01	4.095
0.82213	3.9909	3.7914	2.2666	5.0029	4.0683	3.7966	3.355
1.7521	2.9085	2.6228	7.2738	5.9971	2.8047	2.8782	1.466
1.7229	0.97167	3.8271	3.254	3.1707	3.2386	4.4746	5.3791
1.4409	1.2001	2.1917	2.9495	2.5744	2.4502	5.2486	6.3074
1.3764	1.4195	4.2909	5.1526	3.0215	2.6753	5.6466	11.297
1.8451	2.5523	7.8804	2.8389	3.4794	2.3208	3.2292	1.8237
1.1082	1.3148	2.6775	3.5194	4.5661	2.0957	2.736	2.8571
0.97307	1.1518	2.7973	3.7241	3.5949	4.5632
1.558	2.311	6.3969	5.5522	3.1391	2.928
1.1453	1.3305	4.5026	5.1176	2.178	1.9792
1.268	1.3081	4.4299	3.4897	4.01	4.095
1.6462	2.1766	3.2126	2.0704	3.7966	3.355
1.6139	2.3747	5.7376	2.2288	2.8782	1.466
1.2534	0.50536	6.8826	4.2333	4.4746	5.3791
1.4405	1.6848	4.0076	4.8727	5.2486	6.3074
1.9411	1.4369	2.5531	3.0691	5.6466	11.297
1.4325	1.3655	2.0059	1.5624	3.2292	1.8237
1.0704	1.5258	2.217	3.2608	2.736	2.8571
1.1829	1.8717	4.3572	5.3791
1.0269	0.61586	7.3457	10.595
1.4535	0.7244	3.0326	1.4434
1.5132	2.5143	3.3248	1.7876
1.0724	1.7364	5.0029	4.0683
1.5373	1.0978	5.9971	2.8047
1.3639	2.1184	3.1707	3.2386
0.88182	1.3485	2.5744	2.4502
1.1263	1.3573	2.9591	3.47
1.2723	1.934	3.0215	2.6753
1.2349	3.2967	5.7509	4.7093
1.7478	1.3486	3.4794	2.3208
1.3797	1.2825	4.5661	2.0957
		3.5949	4.5632
		3.1391	2.928
		2.178	1.9792
		3.7246	3.4488
		4.01	4.095
		3.7966	3.355
		2.8782	1.466
		4.4746	5.3791
		5.2486	6.3074
		5.6466	11.297
		3.2292	1.8237
		2.736	2.8571

## Sheet: 6E
low CVs		high CVs		high CVs with P300		high CVs with NfkB
control1	control2	control1	control2	control1	control2	control1	control2
2.0566	1.479	6.7124	6.8273	5.03	5.0028	5.03	5.0028
1.9081	1.5975	5.03	5.0028	2.5967	2.3759	3.6695	3.7108
1.0766	1.1329	2.5967	2.3759	3.6695	3.7108	6.7341	5.8509
1.0295	0.92024	2.7265	4.6353	6.7341	5.8509	5.0496	5.21
1.1119	1.3268	3.6695	3.7108	5.0496	5.21	2.1305	2.1991
1.098	1.0553	4.5408	4.5442	2.1305	2.1991	4.9586	4.3452
1.2966	1.8884	6.7341	5.8509	8.6496	7.944	2.4795	2.9069
1.5135	1.409	5.0496	5.21	3.9545	3.9793	4.6796	4.5968
1.0983	1.2188	2.1305	2.1991	4.9586	4.3452	4.515	4.0904
1.3463	1.38	3.0329	3.1367	2.4795	2.9069	4.0533	2.6802
0.90227	0.92824	4.2113	3.9173	4.6796	4.5968	2.158	3.9236
1.7212	1.8356	8.6496	7.944	4.515	4.0904	4.1803	3.0389
0.99742	0.99052	3.9545	3.9793	4.0533	2.6802	3.1052	2.7033
1.9535	1.7475	4.9586	4.3452	2.158	3.9236	1.8847	2.9552
1.0805	1.1211	2.5776	2.4982	4.1803	3.0389	4.6301	4.5864
1.2182	1.179	2.4795	2.9069	3.1052	2.7033	2.1545	3.7449
1.0565	0.95413	4.6796	4.5968	1.8847	2.9552	2.7024	2.4316
1.3739	1.2295	4.515	4.0904	2.2293	2.1023	3.9109	3.7207
1.0208	0.99334	4.0533	2.6802	4.6301	4.5864	2.4197	2.3453
1.9686	1.5019	2.7831	2.5117	2.1545	3.7449	4.4739	4.8134
1.0857	1.07	2.158	3.9236	2.7024	2.4316	6.4639	8.0416
1.2766	1.4587	4.1803	3.0389	3.9109	3.7207	1.852	2.8423
1.0715	1.5343	3.1052	2.7033	2.4197	2.3453	4.1847	5.0326
1.5227	1.7959	1.8847	2.9552	10.422	11.081	4.7112	5.8038
1.4054	1.3817	5.1063	5.2178	4.4739	4.8134	3.7773	5.4995
1.3088	1.3611	2.2293	2.1023	6.4639	8.0416	5.3076	4.9803
1.3691	1.3339	4.6301	4.5864	4.3555	4.3036	2.8398	3.325
1.906	1.8035	3.373	3.3182	1.852	2.8423	2.5036	2.6049
1.6089	1.4786	2.1545	3.7449	4.1847	5.0326	2.5526	7.1755
1.8715	1.7457	2.7024	2.4316	4.7112	5.8038	2.4924	2.3434
1.2005	1.1573	3.9554	3.4879	3.7773	5.4995	3.3846	3.545
0.73219	0.74468	3.9109	3.7207	5.3076	4.9803	4.1735	3.1864
1.2817	1.2596	2.8488	3.5059	2.8398	3.325	2.8157	2.7914
1.3961	1.3556	2.4197	2.3453	2.5036	2.6049	2.0785	2.0108
0.69952	0.72059	10.422	11.081	2.5526	7.1755	3.3399	3.0076
0.78018	0.73297	4.4739	4.8134	2.4924	2.3434	4.7019	4.4697
2.0731	1.7159	6.4639	8.0416	3.3846	3.545	4.1478	3.1058
1.2827	1.2863	4.3555	4.3036	2.5338	2.3132	3.4392	3.6933
1.6872	1.6279	1.852	2.8423	4.1735	3.1864	4.2748	4.3076
0.84128	0.84185	4.1847	5.0326	2.8157	2.7914	8.7836	6.9611
0.73531	0.72081	4.7112	5.8038	2.0785	2.0108	2.6856	2.6555
1.3473	1.4581	3.7773	5.4995	3.3399	3.0076	2.7468	2.8014
0.99756	1.001	5.3076	4.9803	4.7019	4.4697	3.3328	3.0837
1.1929	1.1578	4.6612	4.6603	4.1478	3.1058	2.953	4.2697
1.7107	1.8057	2.8398	3.325	2.3336	2.8534	2.5138	2.3255
1.0284	1.0079	2.5036	2.6049	3.4392	3.6933	2.0862	1.8889
1.0608	1.0611	2.5526	7.1755	2.2357	2.1372	7.0808	7.5752
1.3252	1.3375	4.4756	4.4753	4.2748	4.3076	3.2879	2.7915
1.1322	1.084	3.9083	3.3696	8.7836	6.9611	3.134	3.2968
1.4902	1.4802	2.4924	2.3434	2.6856	2.6555	4.8404	5.019
1.9107	1.6737	3.3846	3.545	2.7468	2.8014	5.8876	5.8526
1.3557	1.3434	2.5338	2.3132	3.3328	3.0837	2.8255	3.3916
1.2081	1.1347	4.1735	3.1864	2.953	4.2697	2.5014	2.654
0.61263	0.61051	2.8157	2.7914	2.5138	2.3255	2.9642	3.0686
0.78955	0.882	2.0785	2.0108	2.0862	1.8889	3.81	3.0674
1.254	1.2899	3.3675	2.7507	7.0808	7.5752	3.2334	3.048
1.7778	1.7019	3.3399	3.0076	3.2879	2.7915	2.0964	2.2506
0.62176	0.61795	4.7019	4.4697	3.134	3.2968	4.0068	4.01
0.81841	0.8252	4.1478	3.1058	4.8404	5.019	3.4818	3.7921
1.7631	1.7412	2.3336	2.8534	5.8876	5.8526	3.076	2.6564
1.7641	1.6702	3.4392	3.6933	2.8255	3.3916	4.3303	4.6349
1.5641	1.2589	2.2357	2.1372	2.5014	2.654	5.3288	4.9457
1.339	1.4162	4.2748	4.3076	2.9642	3.0686	5.6272	5.6546
1.7891	1.9063	8.7836	6.9611	3.81	3.0674	3.1792	3.2825
1.1212	1.0933	2.6856	2.6555	5.0174	3.9659	1.975	3.8625
0.97989	0.95308	2.7468	2.8014	3.5065	3.3742
1.512	1.5054	6.3184	5.9359	3.2334	3.048
1.1537	1.1366	4.5825	3.9936	2.0964	2.2506
1.2792	1.2564	3.5509	4.4658	4.0068	4.01
1.5922	1.7003	3.3328	3.0837	3.4818	3.7921
1.5299	1.7	12.702	3.427	3.076	2.6564
1.2376	1.1471	7.2626	5.3366	4.3303	4.6349
1.4326	1.4289	2.953	4.2697	5.3288	4.9457
1.8741	2.0124	2.5138	2.3255	5.6272	5.6546
1.1883	1.5284	2.0862	1.8889	3.1792	3.2825
1.0669	1.0586	2.1537	2.2393	1.975	3.8625
1.135	1.2322	4.6423	4.054
1.0197	1.005	7.0808	7.5752
1.2617	1.3587	3.2879	2.7915
1.5403	1.4763	3.134	3.2968
1.0357	1.0332	4.8404	5.019
1.4069	1.6501	5.8876	5.8526
1.5003	1.1622	2.8255	3.3916
0.93888	0.79114	2.5014	2.654
1.1399	1.1127	2.8495	2.7739
1.2631	1.2782	2.9642	3.0686
1.1766	1.2912	5.2957	5.454
1.7755	1.6674	3.81	3.0674
1.5166	1.1783	5.0174	3.9659
		3.5065	3.3742
		3.2334	3.048
		2.0964	2.2506
		3.6856	3.4162
		4.0068	4.01
		3.4818	3.7921
		3.076	2.6564
		4.3303	4.6349
		5.3288	4.9457
		5.6272	5.6546
		3.1792	3.2825
		1.975	3.8625

## Sheet: 6F
log10(CPM)	Fabp5-UMI control	Fabp5-UMI A+L	Fabp5-UMI SAVER control	Fabp5-UMI SAVER A+L	Sdc4-UMI control	Sdc4-UMI A+L	Sdc4-UMI SAVER control	Sdc4-UMI SAVER A+L	Serpinh1-UMI control	Serpinh1-UMI A+L	Serpinh1-UMI SAVER control	Serpinh1-UMI SAVER A+L
-0.1	0	0	0	0	0	0	0	0	0	0	0	0
0	0.080098	0.032017	0	0	0.29451	0.10135	0	0	0.13005	0.05248	0	0
0.1	0	0	0	0	0	0	0	0	0	0	0	0
0.2	0	0	0	0	0	0	0	0	0	0	0	0
0.3	0	0	0	0	0	0	0	0	0	0	0	0
0.4	0	0	0	0	0	0	0	0	0	0	0	0
0.5	0	0	0	0	0	0	0	0	0	0	0	0
0.6	0	0	0	0	0	0	0	0	0	0	0	0
0.7	0	0	0	0	0	0	0	0	0	0	0	0
0.8	0	0	0	0	0	0	0.0005176	0	0	0	0	0
0.9	0	0	0	0	0	0	0.0010352	0	0	0	0	0
1	0.0001294	0	0.0002588	0	0.0003882	0	0.0050466	0.00024073	0	0	0.0003882	0
1.1	0.0005176	0	0.0002588	0	0.001941	0	0.014752	0	0.000647	0.00048146	0.0005176	0
1.2	0.0016822	0.00024073	0.0007764	0	0.0075052	0.00096293	0.032997	0.00048146	0.003235	0.00048146	0.0015528	0.00048146
1.3	0.0078934	0.00024073	0.0040114	0.00024073	0.024457	0.0028888	0.065088	0.0026481	0.010611	0.0021666	0.0041408	0.00024073
1.4	0.018375	0.0038517	0.0087992	0	0.06043	0.015648	0.10093	0.0074627	0.036879	0.006259	0.015657	0.0021666
1.5	0.042572	0.01324	0.022127	0.0012037	0.081134	0.046221	0.12616	0.018777	0.055901	0.017573	0.034032	0.0052961
1.6	0.036361	0.020462	0.036491	0.0026481	0.071817	0.059701	0.12461	0.038036	0.059653	0.028888	0.064312	0.013
1.7	0.040502	0.021666	0.055254	0.0093885	0.068841	0.06572	0.12539	0.064516	0.064441	0.032258	0.098473	0.019018
1.8	0.057065	0.025758	0.070393	0.019499	0.084239	0.076312	0.11051	0.093163	0.093427	0.039961	0.13393	0.037313
1.9	0.074146	0.043091	0.090839	0.036832	0.076346	0.098219	0.091227	0.13553	0.10494	0.064035	0.15321	0.05922
2	0.083463	0.071016	0.10559	0.066923	0.066382	0.11459	0.066641	0.16153	0.10831	0.092441	0.15502	0.0922
2.1	0.091744	0.081127	0.10675	0.10255	0.053442	0.11579	0.043608	0.15118	0.10675	0.11579	0.12526	0.13457
2.2	0.10145	0.12253	0.10274	0.12662	0.036102	0.10761	0.028986	0.12181	0.093556	0.13866	0.092521	0.15696
2.3	0.090192	0.13433	0.10106	0.13553	0.022516	0.084978	0.015269	0.088349	0.057453	0.14709	0.051242	0.16249
2.4	0.080745	0.12277	0.082686	0.13746	0.01294	0.049831	0.010481	0.050072	0.028986	0.11314	0.025492	0.14468
2.5	0.060171	0.11098	0.059006	0.12518	0.0060818	0.029129	0.00647	0.026481	0.014493	0.076793	0.012552	0.088589
2.6	0.041278	0.084978	0.046066	0.094608	0.0055642	0.015648	0.0046584	0.01661	0.004529	0.040443	0.0059524	0.041165
2.7	0.030409	0.053924	0.035973	0.06235	0.0059524	0.0060183	0.0056936	0.011796	0.0031056	0.018296	0.0020704	0.020462
2.8	0.022904	0.02961	0.026139	0.03611	0.0043996	0.0033702	0.003882	0.0050554	0.0023292	0.0048146	0.0028468	0.0093885
2.9	0.013587	0.017333	0.015269	0.019259	0.004529	0.0028888	0.0059524	0.0014444	0.0040114	0.0024073	0.0036232	0.0048146
3	0.0089286	0.0060183	0.010352	0.012277	0.0040114	0.0012037	0.002588	0.0016851	0.0056936	0.0024073	0.0037526	0.0021666
3.1	0.0068582	0.0028888	0.0069876	0.0055368	0.0036232	0.0007222	0.0021998	0.0016851	0.005823	0.0014444	0.005823	0.0026481
3.2	0.003882	0.00048146	0.0047878	0.0026481	0.0014234	0.0007222	0.0021998	0.00048146	0.0028468	0.00048146	0.003235	0.0012037
3.3	0.0023292	0.00096293	0.0031056	0.0014444	0.0010352	0.00024073	0.0014234	0.00024073	0.0015528	0.0012037	0.0021998	0.0012037
3.4	0.001294	0.00048146	0.0014234	0.0012037	0.0003882	0.00024073	0.0010352	0.00048146	0.000647	0	0.0015528	0.00024073
3.5	0.0009058	0	0.0009058	0.00024073	0	0	0.0003882	0.00024073	0.0001294	0	0.0003882	0.00048146
3.6	0.0002588	0	0.0007764	0.00024073	0	0	0.0001294	0	0	0	0	0
3.7	0.0001294	0	0.0003882	0	0	0	0.0001294	0	0	0	0.0001294	0
3.8	0.0001294	0	0.0003882	0	0	0	0	0	0	0	0.0001294	0
3.9	0	0	0.0003882	0	0	0	0	0	0	0	0	0
4	0	0	0	0	0	0	0	0	0	0	0	0
4.1	0	0	0	0	0	0	0	0	0	0	0	0
4.2	0	0	0	0	0	0	0	0	0	0	0	0
4.3	0	0	0	0	0	0	0	0	0	0	0	0
4.4	0	0	0	0	0	0	0	0	0	0	0	0
4.5	0	0	0	0	0	0	0	0	0	0	0	0
4.6	0	0	0	0	0	0	0	0	0	0	0	0
4.7	0	0	0	0	0	0	0	0	0	0	0	0
