# Supplementary material for: Quantitative control of noise in mammalian gene expression by dynamic histone regulation
Source: eLife. 2021 Aug 11;10:e65654. doi: 10.7554/eLife.65654 (PMC8357418; doi:10.7554/eLife.65654)
Supplement: Figure 6—source data 1. [file elife-65654-fig6-data1.xlsx]

## Sheet: 6C-data
mean log(CPM)	CV
0.029518	4.483
0.62768	2.2791
0.062329	4.2382
1.3335	1.0873
0.92756	1.6027
2.2844	0.60892
0.66217	2.2357
0.18042	4.1318
0.65338	2.6234
0.88365	1.8527
0.53586	2.9141
0.70646	2.3819
1.9588	0.74973
2.0579	0.54794
0.46177	2.8829
0.44166	3.1007
1.9618	0.83746
2.1736	2.9334
1.4174	1.018
1.3519	1.1678
0.97951	1.643
2.1993	0.42003
1.6131	0.82607
1.7374	0.71461
1.1203	1.4065
1.549	0.89563
1.5123	0.9204
1.027	1.5832
1.2402	1.2274
2.6422	0.28404
1.4854	0.95506
1.0986	1.4767
2.5611	0.32539
0.20026	4.2054
1.2207	1.2968
1.6647	0.76108
2.3348	0.3905
0.35251	3.6327
1.4685	0.9941
0.46982	3.016
1.537	0.91094
1.4503	0.9469
1.1674	1.3343
1.1555	1.2325
0.36202	3.3087
0.14237	4.2018
0.22905	3.9598
1.4947	0.931
2.1621	0.46539
0.84216	1.9608
2.1181	0.46134
0.49186	2.9755
1.337	1.1469
0.82471	1.9151
2.2456	0.42885
1.2294	1.2326
0.49576	2.7739
0.63262	2.5348
0.85344	1.9249
1.2537	1.3145
1.2193	1.2868
1.2785	1.1706
0.46236	2.8766
1.3918	1.0502
1.2782	1.1846
0.41967	3.0882
1.389	1.0185
0.58432	2.5789
1.2707	1.1929
2.9613	0.21038
1.0212	1.6275
1.796	0.67621
0.29995	3.7059
0.2035	3.9151
1.6634	0.7769
0.39514	3.3777
1.5209	0.91089
0.70577	2.2233
0.86035	1.8988
0.99905	1.6511
0.94168	1.7857
1.3812	1.0499
2.2383	0.43114
1.6667	0.74693
1.0514	1.7023
2.8495	0.22555
0.73513	2.2733
1.6525	0.98835
3.1541	0.18929
0.26946	3.4883
0.71385	2.2846
0.52025	2.8928
0.68421	2.358
1.3625	1.1293
0.67641	2.3371
0.36907	3.3677
1.562	0.87487
0.86889	1.8672
1.4299	0.98752
0.669	2.385
0.0074333	5.6287
1.4738	0.96771
1.6804	0.81221
1.7154	0.72393
1.3072	1.0954
1.7656	0.69496
0.92744	1.7096
0.20039	3.9072
1.7643	0.71296
0.11728	4.4351
2.3675	0.40966
1.5074	0.9004
0.40348	3.1283
1.4016	1.0502
1.2401	1.2333
0.48818	2.9631
0.21087	3.9976
1.7445	0.68793
1.788	0.68545
0.96441	1.7785
0.65472	2.3952
1.5208	0.88801
1.609	0.80616
1.2506	1.2026
0.96205	1.701
0.95872	1.7419
1.1465	1.5192
1.0285	1.5911
0.092568	4.6187
0.39672	3.1775
1.319	1.0982
0.64819	2.4367
0.96924	1.7044
0.56928	2.5691
1.2288	1.2902
1.4111	1.0239
0.62328	2.5594
0.49827	2.5249
0.60056	2.2948
1.136	1.4025
1.7533	0.80256
0.71832	2.2082
1.0499	1.5116
0.97241	1.8445
0.72255	2.2442
1.0292	1.6069
1.8491	0.6263
1.4289	1.0186
0.021999	5.1256
0.24146	3.8916
1.1054	1.4475
0.64152	2.4058
0.44938	3.0943
1.1	1.4029
1.6621	0.83384
0.90596	1.7746
1.898	0.58918
1.7551	0.70128
0.38942	3.0746
0.36877	3.042
0.45909	2.9715
1.4012	1.0684
0.083307	5.0314
1.3687	1.077
2.0211	0.61207
1.8534	0.63753
0.73249	2.2272
2.1191	0.46324
2.5977	0.31541
0.81487	1.8167
1.2281	1.3325
1.0022	1.6575
0.92648	1.7915
0.84358	2.0278
1.0639	1.5046
2.2621	0.58912
1.48	0.96856
1.8248	0.6401
0.132	4.1995
2.1454	0.5558
1.7883	0.70706
1.704	0.7572
0.35595	3.3599
1.7693	0.69973
1.2169	1.2881
0.6665	2.2862
2.2203	0.44827
0.77395	2.0465
0.77145	2.1605
1.7827	0.7051
1.5792	0.83124
0.64798	2.4305
0.71553	2.2476
2.4015	0.41258
0.081547	4.5869
0.099253	4.8112
0.37793	3.2711
0.10324	4.7016
0.71315	2.4155
2.8769	0.50121
3.4749	0.174
1.4583	0.98828
0.64336	2.4504
1.583	0.87679
1.5117	0.91478
1.4103	1.0302
0.91294	1.7613
0.76608	2.088
0.57661	2.4426
1.8505	0.63128
0.58528	2.6251
1.282	1.179
0.9939	1.6172
2.1975	0.46156
1.6684	0.79037
1.7189	0.81279
1.8959	0.59648
1.573	0.94266
2.1576	0.44999
1.3493	1.1169
0.85935	1.9406
0.89709	1.7758
1.0839	1.4518
0.93012	1.7061
0.48645	2.9009
2.684	0.40247
0.42752	3.0483
0.59579	2.5679
1.965	0.61391
0.74684	2.1001
2.489	0.39374
0.7396	2.1237
1.1931	1.2624
0.35493	2.951
2.6853	0.39694
1.1344	1.3746
1.5617	0.90268
0.71519	2.2052
0.43215	3.0423
1.8857	0.85853
1.1425	1.3805
0.78053	2.0219
2.3613	0.36538
0.29879	3.547
0.62633	2.4178
0.42716	2.791
0.84901	1.8882
1.06	1.5337
0.5981	2.4923
2.0784	0.50512
0.85953	1.9294
0.49394	2.5558
0.6926	2.2531
1.0431	1.5409
1.0201	1.5566
1.2772	1.1967
1.5483	0.88617
0.51602	2.806
0.93706	1.6903
0.40643	2.868
2.1534	0.45481
2.7653	0.28356
0.50192	2.9387
0.85432	1.9967
0.60949	2.4814
1.7547	0.71027
1.3754	1.051
2.0141	0.89565
1.6114	0.8089
1.0686	1.6166
1.6022	0.83915
1.1962	1.3893
0.17272	4.1356
1.2607	1.2464
1.8794	0.62674
1.1275	1.4092
0.431	3.0638
1.8704	0.6652
1.2671	1.1913
0.79455	2.0896
0.48589	2.8822
1.8299	0.66651
1.7127	0.72028
1.8793	0.61433
1.2521	1.5019
1.528	0.9373
0.589	2.6782
1.3852	1.0784
0.29926	3.4326
0.55354	2.658
2.4132	0.40528
2.4666	0.35476
1.0096	1.6061
1.6623	0.77881
1.5506	0.89557
1.283	1.1792
0.27221	3.5991
0.99097	1.644
2.313	0.3856
0.37384	3.2464
1.8919	0.5814
1.9174	0.6643
0.14427	4.1415
1.3692	1.0804
1.1365	1.4137
1.8537	0.62597
1.9822	0.57635
1.6167	0.84338
1.0335	1.5454
1.7854	0.6678
1.3101	1.199
1.6333	0.80169
0.82042	1.9641
2.0218	0.53655
0.35461	3.3565
0.063076	4.4504
1.256	1.2435
1.7142	0.7229
0.41094	3.1655
0.59991	2.4821
1.0897	1.6324
2.4466	0.48066
1.3776	1.0834
1.1835	1.1767
1.2055	1.2933
0.95953	1.7385
2.3184	0.41605
0.8245	1.9704
1.9611	0.72865
0.3142	3.5255
1.0776	1.5279
1.4123	1.1167
1.2643	1.176
1.8115	0.64682
1.4976	0.90203
2.117	0.48554
0.91871	1.7883
0.55295	2.7215
1.7702	0.70819
0.4651	3.0315
2.2051	0.42509
0.73914	2.2172
0.89556	1.9642
1.6657	0.7738
1.141	1.3812
1.4946	0.94389
1.0717	1.5652
1.3153	1.6894
1.1597	1.3843
1.3381	1.1397
1.868	0.61625
0.98565	1.7005
0.69894	2.2954
1.9934	0.5479
1.3674	1.1007
1.7795	0.67096
1.4738	0.95054
1.3888	1.0397
1.5503	0.90459
2.8501	0.25605
1.681	0.83154
0.50155	2.7678
1.9277	0.61045
1.546	0.86157
0.24488	3.9966
0.86645	1.8679
2.3218	0.44459
1.8659	0.60156
1.1088	1.4964
0.59073	2.5567
1.6332	0.80514
1.1229	1.4227
0.46122	3.0697
0.75375	2.1087
0.86451	1.8966
0.2762	3.6643
1.4525	0.9881
1.071	1.7496
1.7035	0.74579
0.77519	2.0067
0.31991	3.4242
0.029119	4.8088
1.3085	1.183
1.5898	0.81807
1.9861	0.56851
3.3106	0.169
1.4169	1.0125
1.0491	1.5278
1.3199	1.1605
0.53408	2.8333
0.43261	3.0216
0.7021	2.2736
1.7787	0.80645
0.20357	4.0876
2.1908	0.55027
0.094897	4.3732
2.0814	1.2521
1.8495	0.65454
1.6711	0.76694
1.0128	1.6078
1.5894	0.86223
1.8	0.69656
1.2214	1.2785
0.33231	3.4374
0.39921	3.2572
0.90837	1.7824
1.2788	1.2626
2.5583	0.36718
1.4176	0.99498
0.51015	2.922
0.90663	1.8048
0.75714	2.2217
1.3512	1.1018
2.0403	0.50949
1.5786	0.85209
0.48304	2.9204
1.6007	1.4148
3.6848	0.16675
0.57042	2.3504
0.77608	2.1611
0.076615	4.2801
1.5964	0.83391
1.0614	1.4713
1.8461	0.63669
1.6002	0.98041
0.81336	2.0114
1.3023	1.1447
0.76177	2.1716
0.36184	3.3797
0.59932	2.5219
3.4306	0.21254
1.8383	0.64972
2.3542	0.42253
1.3535	1.0815
0.62526	2.4214
1.5063	0.88669
0.98472	1.6478
0.92945	1.6711
1.6349	0.90344
0.38151	3.2563
1.3211	1.0889
0.81974	1.9999
1.4087	1.0647
3.093	0.22281
1.2037	1.2894
1.4506	0.9665
0.23082	3.9336
1.7112	0.70769
1.5697	0.86572
0.19561	3.9552
1.3159	1.2524
1.9551	0.54607
0.89349	1.821
0.11491	4.4768
1.5799	0.84238
2.2852	0.51666
1.4812	0.96034
1.2726	1.2091
2.0788	0.5202
2.1108	0.59281
1.2069	1.5644
1.8877	0.63051
1.2644	1.1909
1.9987	0.5272
0.84056	1.9355
1.093	1.458
1.359	1.1704
1.8194	0.65339
1.6086	0.87151
1.322	1.1525
1.4235	1.0373
0.23336	3.5235
0.73329	2.1963
0.76104	2.1307
1.9798	0.53222
1.2895	1.1421
1.507	0.90114
1.8955	0.64651
0.74896	2.1484
1.3144	1.1593
0.64381	2.3281
1.4894	0.94734
1.0253	1.5815
2.0201	0.58554
1.4639	0.9814
2.3361	0.41253
0.67101	2.3372
0.30853	3.6246
0.97863	1.6463
2.2756	0.41027
1.71	0.78252
0.93264	1.7398
0.36354	3.3807
1.9779	0.61818
1.4356	1.1218
1.1844	1.3681
0.65529	2.4547
1.1984	1.3505
0.87704	1.8395
0.41791	3.0872
0.92012	1.8133
1.9239	0.80197
0.51592	2.7582
0.93914	1.7669
1.7294	0.78745
1.6235	0.81128
0.45356	3.1792
0.74554	2.1239
2.1804	0.55851
1.1158	1.4486
1.0053	1.6024
0.6186	2.5348
0.9642	1.6735
2.0575	0.53184
0.69748	2.2671
1.5527	0.85105
0.88812	1.881
0.88464	1.8024
1.9906	0.55974
1.509	0.95564
0.17918	4.009
0.56152	2.7599
1.9395	0.5781
0.015485	4.7657
2.0171	0.57406
1.0314	1.6009
2.9079	0.27626
1.6882	0.82151
1.7934	0.73182
1.8321	0.68686
1.6927	1.4014
1.265	1.1738
2.267	0.42929
1.2579	1.2158
1.0255	1.6687
0.77368	2.1799
2.1585	0.50702
1.474	1.0247
0.060259	4.6441
0.68791	2.2766
1.2375	1.2168
1.8959	0.61069
1.8794	0.61399
1.6954	0.76554
1.6408	0.80038
0.80272	1.836
0.35127	3.2902
1.5126	0.93755
1.7499	0.7299
1.3199	1.1314
0.3332	3.6084
0.60527	2.5674
2.1067	0.61625
1.7945	0.73796
1.5241	0.97755
1.0955	1.5735
0.039439	8.3373
0.65371	2.4861
1.3844	1.1027
1.0107	1.6706
1.3868	1.0596
1.604	0.8366
2.6962	0.30247
0.36324	3.3723
1.1032	1.4594
1.4244	0.99685
0.67311	2.3793
0.39508	3.2037
1.2284	1.3619
0.92969	1.808
1.4305	1.0198
1.3793	1.0909
0.99749	1.6964
2.2122	0.85314
1.4815	1.0485
1.4452	1.0013
1.7877	0.66353
2.0366	0.51023
1.3192	1.1026
1.88	0.77735
1.8785	0.65547
1.5111	0.91407
1.3168	1.1475
1.2533	1.2087
0.90295	1.9126
0.60574	2.8433
0.86475	1.9942
0.93224	1.8084
0.74124	2.1924
1.2997	1.1759
1.8084	0.69169
0.76088	2.2152
1.8248	0.64563
1.0871	1.4524
0.86975	1.8621
0.77551	2.0791
1.3334	1.1261
1.3763	1.1316
1.4932	0.96386
3.3798	0.18149
0.67117	2.3481
1.6923	0.73732
1.6116	0.79782
1.3837	1.2316
0.74193	2.2204
1.7537	0.73688
1.4027	1.0841
1.3884	1.0871
1.9589	0.61181
1.9046	0.62764
1.4768	1.0073
1.6246	0.79793
0.19918	4.0471
1.1512	1.3132
1.4697	0.98043
1.3778	1.0634
1.2428	1.2465
0.21012	3.7015
1.2623	1.0788
0.88316	1.8552
0.86629	1.9459
1.5904	0.80932
1.7414	0.89756
0.16116	4.5103
1.4689	0.96993
1.1989	1.2429
0.10074	4.5806
1.2783	1.1778
1.4913	0.9159
1.0385	1.6306
1.192	1.3375
1.2721	1.176
1.4446	0.99452
0.33335	3.491
1.3163	1.1414
1.3711	1.0665
0.18397	4.1201
0.84666	2.1272
0.33011	3.4283
1.2966	1.1888
0.015895	4.7894
1.2963	1.1538
0.11249	3.8669
1.6852	0.79686
0.21611	4.0411
1.2495	1.338
1.4797	0.92084
1.9356	0.60596
1.4422	0.97901
1.4758	1.1329
1.2036	1.2969
0.76881	2.1325
0.16486	3.8058
1.2267	1.2536
0.86469	2.229
1.0753	1.4933
0.79895	2.0842
2.0337	0.5514
0.89938	1.8147
1.0706	1.8655
1.3251	1.1688
2.1798	0.43668
0.15749	4.2012
1.9097	0.60904
1.0781	1.5053
1.5903	0.87426
0.68701	2.3465
2.6196	0.37084
0.68143	2.3636
2.1541	0.44108
0.75534	2.0541
0.25439	3.7438
1.0782	1.4878
1.0571	1.5367
0.59868	2.7036
0.21624	4.0461
2.4334	0.34371
0.0038306	4.9821
1.7728	0.75611
1.5077	0.89799
1.1006	1.4405
0.31721	3.5657
1.5114	0.92212
2.4879	0.31989
1.7062	0.71983
1.2166	1.2625
1.6827	0.79725
0.73953	2.2836
1.3165	1.1358
2.2071	0.43795
0.90985	1.811
2.3425	0.39785
1.8711	0.66407
1.0077	1.584
0.86835	1.9696
1.0911	1.4508
1.3942	1.0833
1.0729	1.6138
0.53196	2.9026
0.77772	2
0.92833	1.7723
1.3511	1.1205
1.4666	0.9463
1.9491	0.58869
1.5308	0.91464
2.5075	0.35329
1.5924	0.83822
1.1658	1.4158
1.9973	0.54352
1.7402	0.74222
1.0091	1.6805
1.353	1.0994
1.784	0.7781
0.4818	2.8322
1.6932	0.72945
1.0261	1.6257
1.4443	1.1151
1.2	1.2874
0.17623	4.2078
0.57151	2.6204
0.21339	4.0144
2.055	0.59368
1.6438	0.81671
0.87191	1.9488
0.2967	3.4037
1.3762	1.1759
0.4731	2.9323
0.087236	4.4881
0.52701	2.6868
0.49246	2.8394
1.0062	1.8923
0.72177	2.0813
0.71563	2.0931
0.95649	1.7289
1.6658	0.76791
1.518	0.87334
1.3013	1.1733
1.2223	1.7099
1.4979	0.97998
0.46106	2.9815
1.3992	1.02
2.335	0.45339
0.94223	1.7058
1.1937	1.3101
0.15185	4.1054
0.98759	1.6261
1.7548	0.68693
1.1153	1.3443
1.1183	1.4083
1.3441	1.1226
0.59166	2.5897
0.75232	2.1585
0.27366	3.5359
0.31619	3.2478
0.8417	1.7895
0.83488	1.8905
0.44228	2.8081
0.21103	4.7618
0.1073	4.3639
0.59943	2.53
0.052189	4.7591
0.39997	3.4168
1.5901	1.8048
0.96945	1.6712
0.62703	2.5475
1.8883	0.59428
0.35877	3.2787
1.1783	1.3147
1.1486	1.3482
0.93564	1.7802
2.2269	0.55047
1.7983	0.65372
2.532	0.32909
1.3133	1.1764
1.4827	0.92954
1.2457	1.2042
0.76287	2.1974
0.21472	3.9878
1.7187	0.79971
2.1282	0.44983
0.93642	1.7119
0.75273	2.124
0.057181	4.9182
1.273	1.1732
1.1236	1.425
1.5845	0.82391
0.41866	3.1158
0.84108	1.9308
1.3013	1.234
1.5013	0.93668
1.3728	1.1302
0.96373	1.7708
1.5253	0.91819
0.47703	2.8538
1.5461	0.86908
1.3405	1.0942
2.0461	0.50197
0.71002	2.2558
0.71803	2.1712
1.2922	1.1558
1.1403	1.3456
0.65784	2.3653
1.152	1.449
2.0595	0.49133
1.5529	0.89837
0.77287	2.1405
0.30775	3.6072
0.25361	3.8229
1.3574	1.0642
1.9307	0.5824
0.56394	2.709
1.5482	0.86414
2.7226	0.49713
3.06	0.31852
3.7551	0.26438
3.5218	0.30891
1.0067	1.6833
2.3556	0.59539
2.3433	0.44736
0.179	4.177
2.6191	0.34117
1.7909	0.67579
1.6968	0.72376
2.2955	0.41617
1.5204	0.96147
1.5371	0.91667
0.96687	1.7249
1.4224	1.0106
0.47157	2.9381
0.99334	1.5898
0.59085	2.4151
1.9427	0.56985
0.71724	2.2322
2.4285	0.35546
0.25468	3.9332
2.1109	0.50133
3.4447	0.1772
2.6881	0.33806
2.2985	0.37697
1.9519	0.59716
1.9879	0.53143
1.1355	1.4237
0.5722	2.6633
1.6342	0.79594
1.7598	0.69457
1.7584	0.71068
0.86239	1.8668
0.98568	1.5966
0.2429	3.8401
1.6764	0.77586
2.36	0.5953
1.4858	0.93765
0.92965	1.7715
0.27207	3.6772
1.569	0.88305
0.82653	1.9845
1.0874	1.5557
1.4418	0.97465
2.1113	0.54502
2.0763	0.4961
0.10985	4.6556
1.311	1.1801
0.47522	2.9714
1.6707	0.72755
0.73925	2.2066
1.4835	0.96186
1.6956	0.7187
0.64549	2.4034
0.4278	3.167
2.4172	0.49751
1.4512	1.0291
1.9183	0.63415
0.81568	2.1291
0.70826	2.2352
1.2172	1.2544
1.7587	0.67971
1.5276	0.9036
1.1215	1.4156
1.5844	0.89707
1.124	1.4092
2.4479	0.34754
1.1596	1.3048
1.9803	0.55121
0.57603	2.7612
2.7226	0.3709
1.0689	1.4711
1.8484	0.61664
0.63587	2.3253
0.16247	4.1768
1.7674	0.69485
2.6548	0.32628
0.26442	3.6111
1.2693	1.1876
0.99252	1.8608
2.2473	0.4452
2.0869	0.57082
0.041217	5.0189
1.2855	1.2617
1.3023	1.3624
1.6006	0.82472
0.82843	1.9698
1.8167	0.68371
2.6187	0.35243
1.6421	0.75372
1.1293	1.4901
0.56471	2.511
0.79932	1.9998
1.0546	1.5194
1.433	1.102
1.579	0.84548
2.97	0.23165
1.506	1.1094
0.052526	4.8604
1.2648	1.234
0.81487	2.0071
1.2822	1.1748
1.2864	1.1457
1.0001	1.5687
2.0646	0.52571
1.5122	0.88218
0.12972	4.1313
1.3655	1.1011
0.28882	3.5952
0.60963	2.5728
2.3889	0.42155
1.0314	1.5716
1.0414	1.5246
2.1462	0.45243
0.49961	2.9485
0.84478	1.889
1.072	1.5153
1.978	0.52752
0.41337	3.007
2.1385	0.45318
0.089974	4.4238
0.32651	3.4412
1.4997	0.94157
1.7225	0.73982
1.6131	0.83259
1.6147	0.81976
0.92853	1.7952
0.067574	4.684
1.6522	1.4044
2.0539	0.58882
0.23151	3.8479
2.4997	0.35851
1.5097	0.89722
2.4596	0.35198
1.6335	0.82112
1.3651	1.0887
0.82961	1.9605
0.074892	5.1437
1.1797	1.363
1.0652	1.4276
1.7053	0.74839
2.2169	0.43953
1.6753	0.75771
0.80957	1.9784
1.8097	0.65887
1.5935	0.87372
1.1904	1.2845
0.061788	4.8794
2.0811	0.56821
1.6499	0.77016
1.2085	1.2731
0.73664	2.2754
1.228	1.2304
0.87796	1.7972
0.734	2.1825
1.1851	1.3499
0.93578	1.7099
1.1034	1.5342
2.4478	0.37947
0.30251	3.1702
0.71827	2.2707
1.2843	1.1482
0.55292	2.7521
1.4066	1.0072
1.1143	1.3781
0.31285	3.4243
2.7248	0.26944
1.1653	1.3634
1.502	0.98471
1.1852	1.3503
2.4479	0.48811
0.57473	2.5885
1.2453	1.2313
0.8439	1.8926
2.267	0.42865
1.7985	0.66943
1.408	1.1542
1.3048	1.1334
1.2937	1.1685
1.16	1.4026
1.4338	0.99032
1.2486	1.2192
1.6301	0.83782
1.3852	1.0939
1.7692	0.74296
1.4703	0.98057
1.7296	0.81974
1.4921	0.92975
0.33912	3.561
0.30286	3.6281
1.8995	0.58428
0.93753	1.7325
1.1661	1.338
0.59803	2.5985
1.1372	1.4624
1.9216	0.73853
0.31876	3.9867
0.53121	2.7528
2.02	0.56882
1.7154	0.74985
1.364	1.0887
0.36776	3.7948
2.4248	0.40763
0.27729	3.5584
1.2668	1.1366
0.83381	2.0208
1.3449	1.1579
1.545	1.0426
1.1014	1.4043
1.0908	1.4549
0.1508	3.9936
1.3859	1.075
0.2048	4.2401
2.5331	0.49654
1.6257	0.90866
1.9215	0.99102
0.48268	3.1269
2.2747	0.54919
0.56124	2.3825
1.207	1.4276
1.8628	0.63532
1.8117	0.64009
0.00117	4.8679
1.678	0.77667
1.7552	0.70432
0.65181	2.4821
2.3718	1.0838
0.8943	1.8573
1.0448	1.7772
0.70301	2.2542
1.4779	0.93208
0.77107	2.212
1.5593	0.93684
1.0557	1.5729
0.35826	3.4014
2.012	0.58892
1.6251	1.6586
1.1026	1.4609
1.5855	0.92145
0.2604	3.697
0.0036251	5.1237
1.7022	0.73641
0.62515	2.4801
1.8345	0.72449
2.1427	0.67468
0.18769	3.8916
1.4928	1.0738
1.9223	0.60213
0.56167	2.6271
2.0941	0.48016
1.6927	0.7358
0.56999	2.6444
1.2943	1.448
1.0046	1.6143
2.1383	0.63338
0.87326	1.8963
0.25772	3.4004
1.5303	0.99302
0.87731	1.9221
1.5876	0.87032
0.81524	1.9273
1.9357	0.55705
1.1874	1.276
1.981	0.54687
0.75558	2.3227
1.1736	1.4113
1.735	0.73853
1.2242	1.2518
2.7387	0.28186
0.81149	2.0041
0.85351	2.0085
1.354	1.1086
0.55854	2.6657
1.5072	0.97384
1.364	1.0782
1.3564	1.1126
0.30957	3.6454
0.37888	3.3014
1.2455	1.2731
2.7997	0.3596
0.29734	3.57
1.5404	0.92037
1.1171	1.4523
0.39869	3.1204
0.50921	2.8152
1.1925	1.3288
0.83907	1.8977
0.37504	3.447
1.2955	1.1172
1.0408	1.5791
1.4597	0.99745
0.6271	5.8851
1.4339	1.0678
1.1198	1.5228
0.89757	1.8046
0.92817	2.0347
2.7967	0.39935
1.7224	0.74284
0.70877	2.3
1.1987	1.4742
0.47767	2.915
1.4618	0.96727
1.1933	1.35
1.0581	1.5391
1.1167	1.517
1.4505	1.0176
1.6145	1.5159
1.7709	0.72469
1.2232	1.2893
1.7846	0.86278
0.35481	3.0343
1.2659	1.186
0.83479	1.9371
2.3404	0.37695
1.1139	1.6453
1.247	1.2933
1.7435	0.69768
1.0396	1.5219
0.92526	1.7325
1.1862	1.3524
0.29886	3.5741
1.0814	1.5129
0.96771	1.6928
1.4557	0.93036
1.8324	0.72041
2.6704	0.92629
1.3831	1.0562
1.3304	1.1347
1.775	0.7196
0.6973	2.2652
1.1129	1.3995
2.4728	0.35088
1.3465	1.1028
2.0937	0.52402
1.6077	0.84129
0.44686	2.7588
0.74672	2.2286
0.40886	3.2436
0.85053	1.9001
1.6192	0.88598
0.3826	3.2916
1.0442	1.571
0.65754	2.4259
1.5385	0.92606
0.29439	3.5103
1.6195	0.79921
1.6734	0.7678
1.5697	0.90672
0.96208	1.7341
1.8347	0.65174
1.2736	1.2254
0.25676	3.7328
1.1214	1.4191
1.6829	0.73359
1.2992	1.1593
2.0667	0.54842
1.3623	1.0802
1.2869	1.1752
1.6912	0.92059
0.96414	1.7249
2.086	0.57403
2.2793	0.38697
1.4289	1.0331
0.90254	1.7966
1.493	0.90546
0.95484	1.7334
1.8014	0.6017
1.8832	0.64037
1.079	1.4437
2.4393	0.36299
0.9287	1.747
0.90855	1.8202
1.0582	1.4751
1.4386	0.98492
0.5081	2.8371
1.3786	1.0412
1.1799	1.3087
2.32	0.41493
1.6411	0.82594
1.9974	0.53991
2.5201	0.3251
0.63073	2.4721
0.38537	3.3646
0.94664	1.705
1.2121	1.2948
1.8435	0.62771
0.63257	2.1872
0.83073	2.131
1.8582	0.62569
0.75012	2.2502
1.329	1.1155
0.61231	2.457
1.0973	1.4349
1.1625	1.3895
2.3928	0.43197
1.3106	1.1534
1.0037	1.6125
0.7484	2.1601
1.4864	0.95705
0.16388	4.5275
1.5184	0.90508
1.5273	0.8816
0.9006	1.7463
1.2319	1.2315
1.2674	1.1837
1.5375	0.93018
1.6895	0.76168
1.0623	1.5945
1.6111	0.81455
0.89011	1.9053
0.02886	4.7395
0.77487	2.1135
2.1706	0.50063
1.469	0.95261
0.26382	3.6003
0.74632	2.1545
1.9101	0.61132
1.3256	1.1619
2.02	0.64547
0.37353	3.3042
2.6788	0.29578
0.59901	2.4889
1.7507	0.73927
1.5777	0.85408
1.12	1.3994
1.2422	1.256
0.99872	1.6931
0.83519	1.9611
0.94801	1.6939
1.6218	0.85213
1.4669	0.97346
0.018555	4.8788
0.27765	3.2546
0.61237	2.7101
0.36103	3.2562
0.2587	3.5688
1.6838	0.71612
1.328	1.1188
1.4575	1.0223
1.1866	1.5306
1.4053	1.0483
1.1527	1.4441
0.13064	4.3163
1.9216	0.61379
1.7068	0.75979
2.1845	0.4498
1.2368	1.3631
2.6111	0.48207
1.4182	0.99731
1.319	1.1064
1.3273	1.1146
0.88751	1.8689
1.8212	0.66502
1.5919	0.91267
0.55208	2.6162
0.36595	3.2312
0.66639	2.3593
1.0651	1.5421
0.35007	3.315
0.11775	4.3657
0.95017	1.7021
0.17561	4.1754
0.73392	2.1584
1.1771	1.3384
0.74301	2.1484
0.61715	2.4825
0.81466	2.0552
2.2128	0.42706
1.7755	0.69254
2.34	0.45201
0.64351	2.6275
1.3902	1.0335
1.0909	1.4291
2.0426	0.5278
0.37317	3.4447
1.8099	0.66003
1.2399	1.2689
3.3611	0.16885
1.3837	1.4669
1.4861	1.0277
1.2627	1.1985
1.1154	1.4472
2.3076	0.39276
1.4892	0.93249
1.7316	0.72804
1.2997	1.1447
0.22284	3.9777
2.4906	0.31902
1.3434	1.1144
0.61947	2.5291
0.046779	9.2543
0.84271	1.9499
0.8578	1.9192
1.9696	1.0488
0.14208	4.1399
1.5988	0.82364
2.383	0.58078
1.4885	0.95685
0.094467	4.8965
2.3456	0.37217
0.72352	2.2767
2.0199	0.57474
0.56939	2.7256
1.0714	1.4879
1.1887	1.4619
0.11552	4.4684
1.2009	1.2867
2.2188	0.41915
1.5027	0.96978
0.80098	2.0024
1.3068	1.1385
1.0839	1.4671
0.89694	1.8407
0.13924	4.4829
2.2808	0.41662
1.2686	1.2529
1.3794	1.0329
2.1779	0.56881
0.91834	1.7517
0.86249	1.8683
0.42788	2.9496
0.87773	1.8754
1.3417	1.104
0.63578	2.4051
0.60851	2.6647
2.4175	0.36249
1.4532	0.97932
1.1507	1.3569
0.62725	2.4495
2.0058	0.53615
1.0163	1.586
1.126	1.4591
0.36685	3.3607
0.013678	5.0217
1.0635	1.5281
0.87636	1.8318
1.2894	1.1668
0.41116	3.1893
1.9148	0.57771
2.2085	0.43644
1.5982	0.8003
1.2334	1.261
0.070288	4.7845
1.5685	0.84307
1.5576	1.5902
0.1436	4.1521
0.65719	2.3199
1.3803	1.0479
1.0205	1.5166
2.6916	0.27629
0.60446	2.6057
1.1895	1.3074
1.2204	1.2623
1.0828	1.5155
2.209	0.43663
1.5021	0.8985
0.022811	4.926
1.5293	0.90204
1.4467	0.95288
0.3008	3.4655
1.2502	1.2292
1.6985	0.73131
0.38526	3.161
2.3933	0.37452
1.6206	0.80433
0.50597	2.7631
0.924	1.7719
1.4096	0.99726
1.2072	1.2699
1.5149	0.91333
2.1995	0.44346
0.25186	3.916
1.3511	1.092
1.4564	1.0209
0.21217	3.6914
2.1001	0.5048
1.1238	1.3934
1.9621	0.71041
0.8671	1.8506
1.2607	1.2345
0.48679	3.0633
1.0878	1.472
0.8625	1.9395
2.012	0.55192
0.96105	1.6985
0.33729	3.5252
1.044	1.5186
0.44633	3.1024
1.6657	0.78559
0.18711	4.082
1.6086	0.84121
0.90239	1.783
1.0991	1.4769
0.31917	3.7087
1.7109	0.78808
1.2187	1.2543
2.0706	0.6043
1.4731	0.97955
1.1717	1.3176
0.73043	2.2196
1.3277	1.1
1.695	0.79569
1.6255	0.81506
2.0249	0.53259
1.2137	1.2873
1.3906	1.0404
1.5732	0.99342
0.43734	3.0947
1.8309	1.0042
1.0114	1.5804
0.34005	3.1453
1.2262	1.2395
0.9986	1.6442
2.366	0.46554
1.4844	0.92302
1.212	1.2794
1.6296	0.80401
1.0277	1.5232
1.0474	1.5341
0.85979	1.8267
0.82692	2.033
1.2612	1.2417
1.3758	1.0647
2.2158	0.42283
1.1701	1.3195
0.89316	1.7888
1.6509	0.89253
0.41176	3.0368
0.30681	3.5305
0.607	2.4345
1.8772	0.65913
0.99551	1.6455
1.3066	1.1422
0.96075	1.6836
0.38607	2.9131
0.766	2.1053
0.89149	1.8462
0.8134	2.0419
1.4315	1.0476
0.65936	2.3347
1.5618	0.88624
1.0621	1.563
1.8279	0.63693
1.2527	1.2629
1.8275	0.65688
1.0272	1.5478
2.7804	0.50139
0.53774	2.7409
0.67145	2.5147
1.6816	0.89764
0.25851	3.4519
1.8306	0.84565
1.2761	1.1811
0.84225	1.9349
0.32463	3.4327
0.16509	4.3372
0.73516	2.0352
1.3487	1.1004
1.8124	0.67325
1.5059	0.94463
1.2185	1.2727
2.1579	0.60951
0.21758	3.8647
2.6529	0.32062
0.42887	3.129
3.5133	0.18541
1.532	0.91203
1.4681	1.0267
1.6546	0.79833
1.388	1.0339
0.3126	3.4499
1.5753	0.88509
1.8834	0.6828
1.2245	1.2542
1.2675	1.2008
0.79048	2.0539
1.2251	1.2943
0.51757	2.7974
1.2378	1.2292
0.96802	1.6696
1.2349	1.2991
1.1002	1.5277
1.7567	0.72446
2.0787	0.55379
1.4084	1.1215
2.3576	0.38182
1.4305	0.97009
1.0028	1.6058
0.48733	2.9646
1.2766	1.1773
0.38619	3.3156
0.33728	3.3079
2.2136	0.4358
0.26093	3.3424
1.6287	0.84069
0.54221	2.6406
0.15789	4.153
0.81221	1.9992
1.2238	1.268
1.0121	1.6537
0.81814	1.9621
0.69412	2.3194
1.9031	0.58903
2.2212	0.44774
0.91978	1.8432
1.5541	0.99788
0.48897	2.9835
1.3651	1.1873
1.7425	0.71574
1.1236	1.407
1.5902	1.006
1.1416	1.3277
0.56364	3.0039
0.7499	2.1946
0.39219	3.2428
2.0594	0.57151
1.4321	1.0324
1.5972	0.81274
1.2368	1.2768
1.5557	0.86318
1.5121	0.9099
1.5196	0.90532
1.5851	0.88515
0.66527	2.4009
0.80758	1.9854
2.4545	0.34184
0.33584	3.325
0.38123	3.3684
1.4242	0.98978
1.7657	0.71158
2.6209	0.33213
1.9862	0.56791
0.41847	3.2081
1.0931	1.4797
1.3111	1.1206
0.93889	1.6903
1.6539	0.83652
1.8239	0.70577
0.81244	2.0256
1.2406	1.2079
0.97151	1.7458
0.7667	2.1912
0.35856	3.2903
0.50533	2.7649
1.5514	0.89259
2.2078	0.44039
0.58037	2.5861
0.96003	1.7082
1.8161	0.64632
1.3033	1.1271
1.4293	0.99728
2.0424	0.54278
0.70149	2.3783
0.69209	2.3258
0.14128	4.3927
2.2797	0.41537
0.22306	4.012
1.7432	0.69757
1.7316	0.77253
1.799	0.67381
1.841	0.63598
0.48174	2.8646
0.90649	1.76
1.0798	1.4852
0.61714	2.2609
0.81302	2.0016
1.025	1.563
0.21268	4.029
0.67843	2.3416
1.9586	0.5694
1.1522	1.3763
0.13944	4.1134
0.4061	3.2302
0.15858	4.0838
0.14364	4.2428
0.79901	2.1162
2.1737	0.45536
0.093385	4.4495
1.8767	0.61726
1.3462	1.0626
0.1918	4.0639
1.9285	0.56359
1.6408	0.83076
3.7927	0.16305
1.5838	0.82214
0.6957	2.4347
1.8106	0.66837
1.1267	1.4249
0.73226	2.2102
1.9805	0.61048
2.1498	0.52401
1.4696	0.95199
1.6084	0.83704
1.9345	0.57879
0.70554	2.3371
1.4129	1.0066
1.2801	1.1636
0.59886	2.6033
0.38196	3.2052
1.0833	1.4834
1.6231	0.83108
2.0039	0.54166
1.475	0.92698
0.44497	3.0778
0.9412	1.7813
1.7682	0.6769
0.69865	2.2724
1.2076	1.2813
0.43856	8.8875
1.7494	0.72727
0.16579	4.268
0.87524	1.9357
0.46749	2.8632
0.97634	1.6412
0.46557	3.1173
1.3964	1.0315
1.9619	0.58206
0.58655	2.6895
0.27496	3.6227
0.75759	2.0845
0.55992	2.5562
1.1143	1.5267
0.0057441	4.9012
1.7521	1.1192
1.7077	0.71574
1.1363	1.4094
1.6051	0.80543
2.034	0.59484
1.461	1.1624
0.83499	1.9487
0.79018	2.1181
0.81773	1.9467
0.58059	2.6056
1.1406	1.3674
1.3299	1.0878
0.45434	3.0236
1.256	1.1744
0.98549	1.6193
0.79052	2.1692
0.48104	2.9082
2.7654	0.27924
0.98348	1.5869
1.1912	1.276
0.63461	2.4269
1.5726	0.86972
1.4742	0.94997
0.81331	1.9741
0.42894	3.1656
1.5511	0.88499
1.7291	0.70504
2.3748	0.3618
1.2954	1.196
0.57322	2.5261
0.49712	2.8599
1.5755	0.86282
1.072	1.521
2.5693	0.31048
0.43337	3.0827
1.3246	1.0908
1.3533	1.0885
1.0211	1.6678
1.6151	0.88506
0.40193	3.4758
0.2343	3.9976
0.48848	2.8461
1.5883	0.84431
1.0983	1.4769
0.88381	1.9537
1.3228	1.1212
2.0658	0.66102
0.43005	3.0002
1.2742	1.1539
1.6407	0.78539
2.1017	0.53828
1.8144	0.74395
1.227	1.2705
0.61336	2.466
1.7223	0.73567
1.4905	1.0255
0.36832	3.1398
0.88878	1.9912
0.80917	2.0503
1.3631	1.0435
1.402	1.5583
0.73214	1.9638
0.91352	1.8177
1.9346	0.60135
0.39214	3.2771
0.61123	2.4967
0.55997	2.6421
1.1762	1.3547
0.45443	2.9911
1.4143	1.0483
0.66675	2.3548
1.4202	0.99799
1.1599	1.3872
1.8778	0.59293
0.48706	2.8746
1.5701	0.91336
1.3329	1.569
0.32825	3.561
0.079579	4.6578
0.2178	4.1982
1.0447	1.4521
0.26436	3.6054
0.95197	1.6894
0.44823	3.1545
2.2107	0.4924
2.0296	0.59212
0.074821	4.6381
1.1475	1.3697
0.90622	1.7372
0.46769	2.8524
1.2145	1.2795
1.0041	1.5922
2.6906	0.28536
0.58264	2.5941
0.99759	1.6483
1.0757	1.4832
0.28467	3.6433
0.98701	1.6621
1.2165	1.2634
0.55503	2.6384
1.0646	1.4802
0.82309	2.0396
1.9846	0.62604
1.7319	0.67979
1.5549	0.87307
0.50648	2.7874
1.2653	1.1892
1.6865	0.80921
0.73844	2.2391
1.6163	0.8348
0.81689	2.083
1.6298	0.77036
0.995	1.641
0.83765	1.9709
1.0194	1.5
0.81556	2.0037
0.49835	2.7885
0.98526	1.6551
1.3645	1.0866
0.60619	2.6252
0.46315	2.9939
0.55339	2.4399
2.6202	0.29216
1.1481	1.4191
1.6208	0.82713
1.1072	1.4211
0.72388	2.1893
1.3363	1.0909
1.5997	0.86103
2.3634	0.37557
0.60751	2.3014
0.62899	2.4806
0.19844	4.2517
0.33507	3.5869
0.69847	2.2769
0.92307	1.8264
1.1205	1.4003
1.4315	0.97166
0.71935	2.199
1.435	1.0181
1.9441	0.58282
1.8972	0.69928
1.9636	0.57742
1.8852	0.69675
1.199	1.322
0.84578	1.8929
0.26076	3.7114
0.099392	4.5136
1.7372	0.75611
0.39893	3.1372
0.83382	1.9637
0.5312	2.7877
1.2218	1.2136
0.27233	3.6104
0.74999	2.0616
0.64763	2.4046
0.75967	2.09
1.8798	0.60293
1.7385	0.86438
0.3087	3.5822
0.92517	1.7382
1.7171	0.78007
1.665	0.79581
0.70468	2.2737
0.94747	1.8136
2.124	0.4816
1.0784	1.4793
0.4551	3.0824
0.66697	2.4469
1.2899	1.3645
1.091	1.4697
0.56684	2.5875
1.2873	1.201
0.89213	1.821
0.50929	2.7943
1.1237	1.4724
1.355	1.1098
0.34629	3.2728
0.45475	2.9445
1.721	0.76623
1.1444	1.3686
0.457	2.9407
1.934	0.58569
0.6463	2.5819
0.31088	3.4573
0.90647	1.8376
0.69442	2.2272
1.0755	1.5389
0.6425	2.4421
0.79455	2.2159
0.87573	1.8172
1.1694	1.3885
1.412	1.4791
0.0063844	5.0457
0.89017	1.8178
1.8041	0.67914
0.52617	2.8182
1.3378	1.2499
2.1317	0.54066
1.7855	0.69605
0.90932	1.8224
0.26132	3.4777
0.48197	2.9488
1.5233	0.87443
1.4001	1.0381
1.2242	1.2993
0.55035	2.5752
1.6399	0.71145
1.1508	1.3438
1.8666	0.60411
0.82784	1.8379
1.8509	0.66585
0.33298	3.3547
1.2049	1.3926
1.2016	1.4346
1.2255	1.347
0.66071	2.3842
1.4613	0.96454
1.4612	1.071
1.1931	1.3059
1.7543	0.69671
1.3894	1.02
0.98001	1.6354
0.28288	4.0017
0.020674	4.8395
1.2141	1.2537
1.4551	0.8959
0.70829	2.3164
1.0244	1.562
2.3236	0.38596
1.0137	1.5628
0.18272	3.975
1.1748	1.3534
1.0534	1.6178
0.6985	2.3054
1.3188	1.0106
1.5668	0.82071
2.0838	0.59469
0.25006	3.5674
2.2061	0.57894
2.075	0.55552
1.7988	0.68708
0.21065	3.8641
0.22802	3.8853
0.79974	2.0415
0.65256	2.4485
0.53334	2.7287
1.3673	1.064
1.0852	1.5507
1.4366	1.0228
0.6866	2.2915
1.3388	1.1295
0.4688	2.9479
1.229	1.2409
0.38747	2.9011
1.8939	0.60763
0.34228	3.3859
0.48371	3.0532
2.1941	0.54516
1.7217	0.75391
1.5446	0.88248
0.050681	4.988
1.0034	1.637
0.20646	4.2441
0.7232	2.5171
2.1837	0.48339
1.4648	0.99991
0.49277	3.0326
1.9374	0.6498
1.4925	0.93527
2.2748	0.58294
1.477	0.97096
1.653	0.78115
0.33612	3.4173
0.78216	2.0999
1.9268	0.57918
1.1479	1.3814
0.1768	4.0833
1.328	1.0852
1.2737	1.1771
0.74921	2.1456
0.49902	2.8303
0.0038196	4.9145
1.2467	1.2658
1.4276	1.0746
1.6531	0.80229
1.33	1.1574
1.2764	1.2586
0.27669	3.7849
1.9687	0.65199
1.004	1.7014
0.20703	3.9606
0.96128	1.7193
1.2483	1.2361
0.9392	1.7856
0.45102	2.9221
2.3734	0.41771
1.4769	0.94282
2.9328	0.3625
2.9633	0.36557
1.6381	0.75912
0.72859	2.2187
0.22227	4.0061
0.63416	2.4014
1.0407	1.5524
0.8474	1.9199
1.2662	1.1812
1.8888	0.62296
0.47083	2.9299
1.5128	1.4325
2.5702	0.37756
0.64005	2.4474
1.1991	1.3087
1.3393	1.1191
1.2674	1.2192
1.3648	1.0651
0.92578	1.8109
2.2942	0.41175
1.3479	1.1279
1.2215	1.2745
1.3461	1.1161
1.0817	1.4586
1.5645	0.86593
0.95225	1.7504
0.76425	2.1926
2.3646	0.37412
2.011	0.58041
1.3723	1.09
0.72123	2.32
0.65886	2.4338
1.579	0.86285
0.30543	3.6672
1.4552	0.92087
1.1081	1.4274
1.6591	0.78737
1.0596	1.5214
0.39999	3.1036
0.63088	2.5344
1.0966	1.4864
1.9337	0.60881
2.9176	0.22014
0.66789	2.3465
1.0345	1.674
0.053813	4.7338
1.2334	1.2733
1.0041	1.6274
1.2811	1.2511
1.4356	0.99329
0.89316	1.8055
0.50637	2.8753
0.30878	3.4371
1.5516	0.92526
0.028327	4.8755
0.98919	1.6382
0.44876	3.18
1.4161	0.99909
0.39736	3.1545
0.34655	3.5146
1.5425	0.90211
2.2988	0.49227
0.63746	2.4825
1.315	1.126
[truncated: 36,197 more rows]

## Sheet: 6C-fit-cutoff
mean log(CPM)	CV	cutoff
0	5.1411	6.5834
0.30103	3.6966	4.729
0.47712	3.048	3.8969
0.60206	2.658	3.397
0.69897	2.3903	3.0538
0.77815	2.1916	2.7993
0.8451	2.0366	2.6007
0.90309	1.9112	2.4401
0.95424	1.8071	2.3067
1	1.7187	2.1936
1.0414	1.6425	2.096
1.0792	1.5759	2.0108
1.1139	1.517	1.9354
1.1461	1.4644	1.8681
1.1761	1.4171	1.8076
1.2041	1.3743	1.7528
1.2304	1.3352	1.7028
1.2553	1.2994	1.657
1.2788	1.2664	1.6148
1.301	1.2358	1.5757
1.3222	1.2075	1.5394
1.3424	1.181	1.5056
1.3617	1.1563	1.474
1.3802	1.1331	1.4444
1.3979	1.1113	1.4165
1.415	1.0908	1.3902
1.4314	1.0714	1.3654
1.4472	1.053	1.3419
1.4624	1.0355	1.3196
1.4771	1.019	1.2985
1.4914	1.0032	1.2783
1.5051	0.98815	1.2591
1.5185	0.97379	1.2407
1.5315	0.96005	1.2232
1.5441	0.9469	1.2064
1.5563	0.93429	1.1902
1.5682	0.92219	1.1748
1.5798	0.91056	1.1599
1.5911	0.89938	1.1456
1.6021	0.88861	1.1319
1.6128	0.87823	1.1186
1.6232	0.86821	1.1058
1.6335	0.85855	1.0935
1.6435	0.8492	1.0815
1.6532	0.84017	1.07
1.6628	0.83143	1.0588
1.6721	0.82296	1.048
1.6812	0.81476	1.0375
1.6902	0.80681	1.0274
1.699	0.79909	1.0175
1.7076	0.79159	1.0079
1.716	0.78431	0.99865
1.7243	0.77723	0.98961
1.7324	0.77035	0.98082
1.7404	0.76366	0.97227
1.7482	0.75714	0.96394
1.7559	0.75079	0.95583
1.7634	0.7446	0.94793
1.7709	0.73857	0.94023
1.7782	0.73268	0.93271
1.7853	0.72694	0.92538
1.7924	0.72134	0.91823
1.7993	0.71587	0.91125
1.8062	0.71052	0.90442
1.8129	0.7053	0.89775
1.8195	0.70019	0.89123
1.8261	0.6952	0.88486
1.8325	0.69032	0.87863
1.8388	0.68554	0.87253
1.8451	0.68086	0.86655
1.8513	0.67628	0.86071
1.8573	0.6718	0.85498
1.8633	0.6674	0.84937
1.8692	0.66309	0.84387
1.8751	0.65887	0.83848
1.8808	0.65473	0.8332
1.8865	0.65067	0.82802
1.8921	0.64669	0.82293
1.8976	0.64278	0.81794
1.9031	0.63894	0.81305
1.9085	0.63518	0.80824
1.9138	0.63148	0.80352
1.9191	0.62785	0.79889
1.9243	0.62428	0.79433
1.9294	0.62078	0.78986
1.9345	0.61733	0.78546
1.9395	0.61394	0.78114
1.9445	0.61061	0.77689
1.9494	0.60734	0.77271
1.9542	0.60412	0.7686
1.959	0.60095	0.76456
1.9638	0.59783	0.76058
1.9685	0.59477	0.75667
1.9731	0.59175	0.75281
1.9777	0.58877	0.74902
1.9823	0.58585	0.74529
1.9868	0.58297	0.74161
1.9912	0.58013	0.73799
1.9956	0.57733	0.73442
2	0.57458	0.73091
2.0043	0.57186	0.72744
2.0086	0.56919	0.72403
2.0128	0.56655	0.72067
2.017	0.56395	0.71735
2.0212	0.56139	0.71408
2.0253	0.55886	0.71086
2.0294	0.55637	0.70768
2.0334	0.55392	0.70455
2.0374	0.55149	0.70145
2.0414	0.5491	0.6984
2.0453	0.54674	0.69539
2.0492	0.54441	0.69242
2.0531	0.54211	0.68949
2.0569	0.53985	0.6866
2.0607	0.53761	0.68374
2.0645	0.5354	0.68092
2.0682	0.53321	0.67814
2.0719	0.53106	0.67539
2.0755	0.52893	0.67267
2.0792	0.52683	0.66999
2.0828	0.52475	0.66734
2.0864	0.5227	0.66473
2.0899	0.52067	0.66214
2.0934	0.51867	0.65959
2.0969	0.51669	0.65706
2.1004	0.51474	0.65457
2.1038	0.51281	0.6521
2.1072	0.5109	0.64967
2.1106	0.50901	0.64726
2.1139	0.50714	0.64488
2.1173	0.50529	0.64252
2.1206	0.50347	0.6402
2.1239	0.50166	0.63789
2.1271	0.49988	0.63562
2.1303	0.49811	0.63337
2.1335	0.49637	0.63114
2.1367	0.49464	0.62894
2.1399	0.49293	0.62676
2.143	0.49124	0.6246
2.1461	0.48957	0.62247
2.1492	0.48791	0.62036
2.1523	0.48627	0.61827
2.1553	0.48465	0.6162
2.1584	0.48305	0.61415
2.1614	0.48146	0.61213
2.1644	0.47989	0.61012
2.1673	0.47833	0.60814
2.1703	0.47679	0.60617
2.1732	0.47527	0.60423
2.1761	0.47376	0.6023
2.179	0.47226	0.6004
2.1818	0.47078	0.59851
2.1847	0.46931	0.59664
2.1875	0.46786	0.59478
2.1903	0.46642	0.59295
2.1931	0.465	0.59113
2.1959	0.46358	0.58933
2.1987	0.46219	0.58755
2.2014	0.4608	0.58578
2.2041	0.45943	0.58403
2.2068	0.45807	0.5823
2.2095	0.45672	0.58058
2.2122	0.45538	0.57888
2.2148	0.45406	0.57719
2.2175	0.45275	0.57552
2.2201	0.45145	0.57386
2.2227	0.45016	0.57222
2.2253	0.44888	0.57059
2.2279	0.44762	0.56897
2.2304	0.44636	0.56737
2.233	0.44512	0.56579
2.2355	0.44389	0.56422
2.238	0.44266	0.56266
2.2405	0.44145	0.56111
2.243	0.44025	0.55958
2.2455	0.43906	0.55806
2.248	0.43787	0.55655
2.2504	0.4367	0.55506
2.2529	0.43554	0.55358
2.2553	0.43439	0.55211
2.2577	0.43324	0.55065
2.2601	0.43211	0.5492
2.2625	0.43098	0.54777
2.2648	0.42987	0.54634
2.2672	0.42876	0.54493
2.2695	0.42766	0.54353
2.2718	0.42657	0.54214
2.2742	0.42549	0.54076
2.2765	0.42442	0.5394
2.2788	0.42335	0.53804
2.281	0.4223	0.53669
2.2833	0.42125	0.53536
2.2856	0.42021	0.53403
2.2878	0.41918	0.53272
2.29	0.41815	0.53141
2.2923	0.41714	0.53011
2.2945	0.41613	0.52883
2.2967	0.41513	0.52755
2.2989	0.41413	0.52629
2.301	0.41314	0.52503
2.3032	0.41217	0.52378
2.3054	0.41119	0.52254
2.3075	0.41023	0.52131
2.3096	0.40927	0.52009
2.3118	0.40832	0.51888
2.3139	0.40737	0.51767
2.316	0.40644	0.51648
2.3181	0.40551	0.51529
2.3201	0.40458	0.51411
2.3222	0.40366	0.51294
2.3243	0.40275	0.51178
2.3263	0.40185	0.51063
2.3284	0.40095	0.50948
2.3304	0.40006	0.50834
2.3324	0.39917	0.50721
2.3345	0.39829	0.50609
2.3365	0.39741	0.50498
2.3385	0.39655	0.50387
2.3404	0.39568	0.50277
2.3424	0.39483	0.50168
2.3444	0.39397	0.50059
2.3464	0.39313	0.49952
2.3483	0.39229	0.49845
2.3502	0.39145	0.49738
2.3522	0.39063	0.49633
2.3541	0.3898	0.49528
2.356	0.38898	0.49423
2.3579	0.38817	0.4932
2.3598	0.38736	0.49217
2.3617	0.38656	0.49115
2.3636	0.38576	0.49013
2.3655	0.38497	0.48912
2.3674	0.38419	0.48812
2.3692	0.3834	0.48712
2.3711	0.38263	0.48613
2.3729	0.38185	0.48515
2.3747	0.38109	0.48417
2.3766	0.38032	0.4832
2.3784	0.37957	0.48223
2.3802	0.37881	0.48127
2.382	0.37806	0.48032
2.3838	0.37732	0.47937
2.3856	0.37658	0.47843
2.3874	0.37584	0.47749
2.3892	0.37511	0.47656
2.3909	0.37439	0.47563
2.3927	0.37366	0.47471
2.3945	0.37295	0.4738
2.3962	0.37223	0.47289
2.3979	0.37152	0.47198
2.3997	0.37082	0.47109
2.4014	0.37012	0.47019
2.4031	0.36942	0.4693
2.4048	0.36873	0.46842
2.4065	0.36804	0.46754
2.4082	0.36736	0.46667
2.4099	0.36667	0.4658
2.4116	0.366	0.46494
2.4133	0.36532	0.46408
2.415	0.36465	0.46323
2.4166	0.36399	0.46238
2.4183	0.36333	0.46154
2.42	0.36267	0.4607
2.4216	0.36202	0.45987
2.4232	0.36136	0.45904
2.4249	0.36072	0.45821
2.4265	0.36007	0.45739
2.4281	0.35943	0.45658
2.4298	0.3588	0.45577
2.4314	0.35816	0.45496
2.433	0.35753	0.45416
2.4346	0.35691	0.45336
2.4362	0.35629	0.45257
2.4378	0.35567	0.45178
2.4393	0.35505	0.45099
2.4409	0.35444	0.45021
2.4425	0.35383	0.44944
2.444	0.35322	0.44866
2.4456	0.35262	0.4479
2.4472	0.35202	0.44713
2.4487	0.35142	0.44637
2.4502	0.35083	0.44562
2.4518	0.35024	0.44486
2.4533	0.34965	0.44412
2.4548	0.34907	0.44337
2.4564	0.34849	0.44263
2.4579	0.34791	0.44189
2.4594	0.34733	0.44116
2.4609	0.34676	0.44043
2.4624	0.34619	0.43971
2.4639	0.34562	0.43898
2.4654	0.34506	0.43827
2.4669	0.3445	0.43755
2.4683	0.34394	0.43684
2.4698	0.34339	0.43613
2.4713	0.34283	0.43543
2.4728	0.34228	0.43473
2.4742	0.34174	0.43403
2.4757	0.34119	0.43334
2.4771	0.34065	0.43265
2.4786	0.34011	0.43196
2.48	0.33957	0.43128
2.4814	0.33904	0.4306
2.4829	0.33851	0.42992
2.4843	0.33798	0.42925
2.4857	0.33746	0.42858
2.4871	0.33693	0.42791
2.4886	0.33641	0.42725
2.49	0.33589	0.42659
2.4914	0.33538	0.42593
2.4928	0.33486	0.42528
2.4942	0.33435	0.42462
2.4955	0.33384	0.42398
2.4969	0.33334	0.42333
2.4983	0.33283	0.42269
2.4997	0.33233	0.42205
2.5011	0.33183	0.42141
2.5024	0.33133	0.42078
2.5038	0.33084	0.42015
2.5051	0.33035	0.41952
2.5065	0.32986	0.4189
2.5079	0.32937	0.41828
2.5092	0.32888	0.41766
2.5105	0.3284	0.41704
2.5119	0.32792	0.41643
2.5132	0.32744	0.41582
2.5145	0.32696	0.41521
2.5159	0.32649	0.41461
2.5172	0.32602	0.41401
2.5185	0.32555	0.41341
2.5198	0.32508	0.41281
2.5211	0.32461	0.41222
2.5224	0.32415	0.41163
2.5237	0.32368	0.41104
2.525	0.32322	0.41045
2.5263	0.32277	0.40987
2.5276	0.32231	0.40929
2.5289	0.32186	0.40871
2.5302	0.3214	0.40813
2.5315	0.32095	0.40756
2.5328	0.32051	0.40699
2.534	0.32006	0.40642
2.5353	0.31961	0.40585
2.5366	0.31917	0.40529
2.5378	0.31873	0.40473
2.5391	0.31829	0.40417
2.5403	0.31786	0.40361
2.5416	0.31742	0.40306
2.5428	0.31699	0.40251
2.5441	0.31656	0.40196
2.5453	0.31613	0.40141
2.5465	0.3157	0.40087
2.5478	0.31527	0.40032
2.549	0.31485	0.39978
2.5502	0.31443	0.39925
2.5514	0.31401	0.39871
2.5527	0.31359	0.39818
2.5539	0.31317	0.39765
2.5551	0.31276	0.39712
2.5563	0.31234	0.39659
2.5575	0.31193	0.39607
2.5587	0.31152	0.39554
2.5599	0.31111	0.39502
2.5611	0.3107	0.3945
2.5623	0.3103	0.39399
2.5635	0.30989	0.39347
2.5647	0.30949	0.39296
2.5658	0.30909	0.39245
2.567	0.30869	0.39194
2.5682	0.3083	0.39144
2.5694	0.3079	0.39093
2.5705	0.30751	0.39043
2.5717	0.30711	0.38993
2.5729	0.30672	0.38943
2.574	0.30633	0.38894
2.5752	0.30595	0.38844
2.5763	0.30556	0.38795
2.5775	0.30517	0.38746
2.5786	0.30479	0.38697
2.5798	0.30441	0.38649
2.5809	0.30403	0.386
2.5821	0.30365	0.38552
2.5832	0.30327	0.38504
2.5843	0.3029	0.38456
2.5855	0.30252	0.38408
2.5866	0.30215	0.38361
2.5877	0.30178	0.38313
2.5888	0.30141	0.38266
2.5899	0.30104	0.38219
2.5911	0.30067	0.38172
2.5922	0.3003	0.38126
2.5933	0.29994	0.38079
2.5944	0.29957	0.38033
2.5955	0.29921	0.37987
2.5966	0.29885	0.37941
2.5977	0.29849	0.37895
2.5988	0.29813	0.3785
2.5999	0.29778	0.37804
2.601	0.29742	0.37759
2.6021	0.29707	0.37714
2.6031	0.29672	0.37669
2.6042	0.29636	0.37624
2.6053	0.29601	0.3758
2.6064	0.29566	0.37535
2.6075	0.29532	0.37491
2.6085	0.29497	0.37447
2.6096	0.29463	0.37403
2.6107	0.29428	0.37359
2.6117	0.29394	0.37316
2.6128	0.2936	0.37272
2.6138	0.29326	0.37229
2.6149	0.29292	0.37186
2.616	0.29258	0.37143
2.617	0.29224	0.371
2.618	0.29191	0.37057
2.6191	0.29158	0.37015
2.6201	0.29124	0.36972
2.6212	0.29091	0.3693
2.6222	0.29058	0.36888
2.6232	0.29025	0.36846
2.6243	0.28992	0.36804
2.6253	0.2896	0.36762
2.6263	0.28927	0.36721
2.6274	0.28894	0.3668
2.6284	0.28862	0.36638
2.6294	0.2883	0.36597
2.6304	0.28798	0.36556
2.6314	0.28766	0.36516
2.6325	0.28734	0.36475
2.6335	0.28702	0.36434
2.6345	0.2867	0.36394
2.6355	0.28639	0.36354
2.6365	0.28607	0.36314
2.6375	0.28576	0.36274
2.6385	0.28544	0.36234
2.6395	0.28513	0.36194
2.6405	0.28482	0.36155
2.6415	0.28451	0.36115
2.6425	0.2842	0.36076
2.6435	0.2839	0.36037
2.6444	0.28359	0.35998
2.6454	0.28328	0.35959
2.6464	0.28298	0.3592
2.6474	0.28268	0.35881
2.6484	0.28237	0.35843
2.6493	0.28207	0.35805
2.6503	0.28177	0.35766
2.6513	0.28147	0.35728
2.6522	0.28117	0.3569
2.6532	0.28088	0.35652
2.6542	0.28058	0.35615
2.6551	0.28028	0.35577
2.6561	0.27999	0.35539
2.6571	0.2797	0.35502
2.658	0.2794	0.35465
2.659	0.27911	0.35428
2.6599	0.27882	0.35391
2.6609	0.27853	0.35354
2.6618	0.27824	0.35317
2.6628	0.27795	0.3528
2.6637	0.27767	0.35244
2.6646	0.27738	0.35207
2.6656	0.2771	0.35171
2.6665	0.27681	0.35135
2.6675	0.27653	0.35099
2.6684	0.27625	0.35063
2.6693	0.27596	0.35027
2.6702	0.27568	0.34991
2.6712	0.2754	0.34955
2.6721	0.27512	0.3492
2.673	0.27485	0.34885
2.6739	0.27457	0.34849
2.6749	0.27429	0.34814
2.6758	0.27402	0.34779
2.6767	0.27374	0.34744
2.6776	0.27347	0.34709
2.6785	0.2732	0.34674
2.6794	0.27292	0.3464
2.6803	0.27265	0.34605
2.6812	0.27238	0.34571
2.6821	0.27211	0.34537
2.683	0.27184	0.34502
2.6839	0.27158	0.34468
2.6848	0.27131	0.34434
2.6857	0.27104	0.344
2.6866	0.27078	0.34366
2.6875	0.27051	0.34333
2.6884	0.27025	0.34299
2.6893	0.26998	0.34266
2.6902	0.26972	0.34232
2.6911	0.26946	0.34199
2.692	0.2692	0.34166
2.6928	0.26894	0.34133
2.6937	0.26868	0.341
2.6946	0.26842	0.34067
2.6955	0.26816	0.34034
2.6964	0.26791	0.34001
2.6972	0.26765	0.33969
2.6981	0.2674	0.33936
2.699	0.26714	0.33904
2.6998	0.26689	0.33871
2.7007	0.26663	0.33839
2.7016	0.26638	0.33807
2.7024	0.26613	0.33775
2.7033	0.26588	0.33743
2.7042	0.26563	0.33711
2.705	0.26538	0.3368
2.7059	0.26513	0.33648
2.7067	0.26488	0.33616
2.7076	0.26464	0.33585
2.7084	0.26439	0.33553
2.7093	0.26414	0.33522
2.7101	0.2639	0.33491
2.711	0.26365	0.3346
2.7118	0.26341	0.33429
2.7126	0.26317	0.33398
2.7135	0.26292	0.33367
2.7143	0.26268	0.33336
2.7152	0.26244	0.33306
2.716	0.2622	0.33275
2.7168	0.26196	0.33245
2.7177	0.26172	0.33214
2.7185	0.26149	0.33184
2.7193	0.26125	0.33154
2.7202	0.26101	0.33123
2.721	0.26077	0.33093
2.7218	0.26054	0.33063
2.7226	0.2603	0.33033
2.7235	0.26007	0.33004
2.7243	0.25984	0.32974
2.7251	0.2596	0.32944
2.7259	0.25937	0.32915
2.7267	0.25914	0.32885
2.7275	0.25891	0.32856
2.7284	0.25868	0.32826
2.7292	0.25845	0.32797
2.73	0.25822	0.32768
2.7308	0.25799	0.32739
2.7316	0.25776	0.3271
2.7324	0.25754	0.32681
2.7332	0.25731	0.32652
2.734	0.25708	0.32623
2.7348	0.25686	0.32595
2.7356	0.25663	0.32566
2.7364	0.25641	0.32538
2.7372	0.25618	0.32509
2.738	0.25596	0.32481
2.7388	0.25574	0.32452
2.7396	0.25552	0.32424
2.7404	0.2553	0.32396
2.7412	0.25508	0.32368
2.7419	0.25486	0.3234
2.7427	0.25464	0.32312
2.7435	0.25442	0.32284
2.7443	0.2542	0.32256
2.7451	0.25398	0.32229
2.7459	0.25376	0.32201
2.7466	0.25355	0.32173
2.7474	0.25333	0.32146
2.7482	0.25312	0.32119
2.749	0.2529	0.32091
2.7497	0.25269	0.32064
2.7505	0.25247	0.32037
2.7513	0.25226	0.3201
2.752	0.25205	0.31983
2.7528	0.25184	0.31956
2.7536	0.25162	0.31929
2.7543	0.25141	0.31902
2.7551	0.2512	0.31875
2.7559	0.25099	0.31848
2.7566	0.25078	0.31822
2.7574	0.25058	0.31795
2.7582	0.25037	0.31769
2.7589	0.25016	0.31742
2.7597	0.24995	0.31716
2.7604	0.24975	0.3169
2.7612	0.24954	0.31663
2.7619	0.24933	0.31637
2.7627	0.24913	0.31611
2.7634	0.24893	0.31585
2.7642	0.24872	0.31559
2.7649	0.24852	0.31533
2.7657	0.24831	0.31507
2.7664	0.24811	0.31482
2.7672	0.24791	0.31456
2.7679	0.24771	0.3143
2.7686	0.24751	0.31405
2.7694	0.24731	0.31379
2.7701	0.24711	0.31354
2.7709	0.24691	0.31328
2.7716	0.24671	0.31303
2.7723	0.24651	0.31278
2.7731	0.24631	0.31253
2.7738	0.24612	0.31228
2.7745	0.24592	0.31203
2.7752	0.24572	0.31178
2.776	0.24553	0.31153
2.7767	0.24533	0.31128
2.7774	0.24514	0.31103
2.7782	0.24494	0.31078
2.7789	0.24475	0.31053
2.7796	0.24455	0.31029
2.7803	0.24436	0.31004
2.781	0.24417	0.3098
2.7818	0.24398	0.30955
2.7825	0.24378	0.30931
2.7832	0.24359	0.30907
2.7839	0.2434	0.30882
2.7846	0.24321	0.30858
2.7853	0.24302	0.30834
2.786	0.24283	0.3081
2.7868	0.24264	0.30786
2.7875	0.24246	0.30762
2.7882	0.24227	0.30738
2.7889	0.24208	0.30714
2.7896	0.24189	0.3069
2.7903	0.24171	0.30666
2.791	0.24152	0.30643
2.7917	0.24133	0.30619
2.7924	0.24115	0.30596
2.7931	0.24096	0.30572
2.7938	0.24078	0.30549
2.7945	0.2406	0.30525
2.7952	0.24041	0.30502
2.7959	0.24023	0.30478
2.7966	0.24005	0.30455
2.7973	0.23986	0.30432
2.798	0.23968	0.30409
2.7987	0.2395	0.30386
2.7993	0.23932	0.30363
2.8	0.23914	0.3034
2.8007	0.23896	0.30317
2.8014	0.23878	0.30294
2.8021	0.2386	0.30271
2.8028	0.23842	0.30248
2.8035	0.23824	0.30226
2.8041	0.23807	0.30203
2.8048	0.23789	0.3018
2.8055	0.23771	0.30158
2.8062	0.23753	0.30135
2.8069	0.23736	0.30113
2.8075	0.23718	0.30091
2.8082	0.23701	0.30068
2.8089	0.23683	0.30046
2.8096	0.23666	0.30024
2.8102	0.23648	0.30002
2.8109	0.23631	0.29979
2.8116	0.23613	0.29957
2.8122	0.23596	0.29935
2.8129	0.23579	0.29913
2.8136	0.23562	0.29891
2.8142	0.23544	0.29869
2.8149	0.23527	0.29848
2.8156	0.2351	0.29826
2.8162	0.23493	0.29804
2.8169	0.23476	0.29782
2.8176	0.23459	0.29761
2.8182	0.23442	0.29739
2.8189	0.23425	0.29718
2.8195	0.23408	0.29696
2.8202	0.23391	0.29675
2.8209	0.23374	0.29653
2.8215	0.23358	0.29632
2.8222	0.23341	0.29611
2.8228	0.23324	0.29589
2.8235	0.23307	0.29568
2.8241	0.23291	0.29547
2.8248	0.23274	0.29526
2.8254	0.23258	0.29505
2.8261	0.23241	0.29484
2.8267	0.23225	0.29463
2.8274	0.23208	0.29442
2.828	0.23192	0.29421
2.8287	0.23175	0.294
2.8293	0.23159	0.29379
2.8299	0.23143	0.29358
2.8306	0.23127	0.29338
2.8312	0.2311	0.29317
2.8319	0.23094	0.29297
2.8325	0.23078	0.29276
2.8331	0.23062	0.29255
2.8338	0.23046	0.29235
2.8344	0.2303	0.29214
2.8351	0.23014	0.29194
2.8357	0.22998	0.29174
2.8363	0.22982	0.29153
2.837	0.22966	0.29133
2.8376	0.2295	0.29113
2.8382	0.22934	0.29093
2.8388	0.22918	0.29073
2.8395	0.22902	0.29053
2.8401	0.22887	0.29033
2.8407	0.22871	0.29013
2.8414	0.22855	0.28993
2.842	0.2284	0.28973
2.8426	0.22824	0.28953
2.8432	0.22808	0.28933
2.8439	0.22793	0.28913
2.8445	0.22777	0.28893
2.8451	0.22762	0.28874
2.8457	0.22746	0.28854
2.8463	0.22731	0.28834
2.847	0.22715	0.28815
2.8476	0.227	0.28795
2.8482	0.22685	0.28776
2.8488	0.2267	0.28756
2.8494	0.22654	0.28737
2.85	0.22639	0.28717
2.8506	0.22624	0.28698
2.8513	0.22609	0.28679
2.8519	0.22594	0.2866
2.8525	0.22578	0.2864
2.8531	0.22563	0.28621
2.8537	0.22548	0.28602
2.8543	0.22533	0.28583
2.8549	0.22518	0.28564
2.8555	0.22503	0.28545
2.8561	0.22488	0.28526
2.8567	0.22474	0.28507
2.8573	0.22459	0.28488
2.8579	0.22444	0.28469
2.8585	0.22429	0.2845
2.8591	0.22414	0.28432
2.8597	0.224	0.28413
2.8603	0.22385	0.28394
2.8609	0.2237	0.28375
2.8615	0.22356	0.28357
2.8621	0.22341	0.28338
2.8627	0.22326	0.2832
2.8633	0.22312	0.28301
2.8639	0.22297	0.28283
2.8645	0.22283	0.28264
2.8651	0.22268	0.28246
2.8657	0.22254	0.28227
2.8663	0.22239	0.28209
2.8669	0.22225	0.28191
2.8675	0.22211	0.28172
2.8681	0.22196	0.28154
2.8686	0.22182	0.28136
2.8692	0.22168	0.28118
2.8698	0.22154	0.281
2.8704	0.22139	0.28082
2.871	0.22125	0.28064
2.8716	0.22111	0.28046
2.8722	0.22097	0.28028
2.8727	0.22083	0.2801
2.8733	0.22069	0.27992
2.8739	0.22055	0.27974
2.8745	0.22041	0.27956
2.8751	0.22027	0.27938
2.8756	0.22013	0.27921
2.8762	0.21999	0.27903
2.8768	0.21985	0.27885
2.8774	0.21971	0.27868
2.8779	0.21957	0.2785
2.8785	0.21943	0.27832
2.8791	0.21929	0.27815
2.8797	0.21916	0.27797
2.8802	0.21902	0.2778
2.8808	0.21888	0.27762
2.8814	0.21875	0.27745
2.882	0.21861	0.27727
2.8825	0.21847	0.2771
2.8831	0.21834	0.27693
2.8837	0.2182	0.27676
2.8842	0.21806	0.27658
2.8848	0.21793	0.27641
2.8854	0.21779	0.27624
2.8859	0.21766	0.27607
2.8865	0.21752	0.2759
2.8871	0.21739	0.27573
2.8876	0.21726	0.27555
2.8882	0.21712	0.27538
2.8887	0.21699	0.27521
2.8893	0.21686	0.27505
2.8899	0.21672	0.27488
2.8904	0.21659	0.27471
2.891	0.21646	0.27454
2.8915	0.21633	0.27437
2.8921	0.21619	0.2742
2.8927	0.21606	0.27403
2.8932	0.21593	0.27387
2.8938	0.2158	0.2737
2.8943	0.21567	0.27353
2.8949	0.21554	0.27337
2.8954	0.21541	0.2732
2.896	0.21528	0.27304
2.8965	0.21515	0.27287
2.8971	0.21502	0.2727
2.8976	0.21489	0.27254
2.8982	0.21476	0.27238
2.8987	0.21463	0.27221
2.8993	0.2145	0.27205
2.8998	0.21437	0.27188
2.9004	0.21424	0.27172
2.9009	0.21411	0.27156
2.9015	0.21399	0.27139
2.902	0.21386	0.27123
2.9025	0.21373	0.27107
2.9031	0.2136	0.27091
2.9036	0.21348	0.27075
2.9042	0.21335	0.27059
2.9047	0.21322	0.27043
2.9053	0.2131	0.27026
2.9058	0.21297	0.2701
2.9063	0.21285	0.26994
2.9069	0.21272	0.26978
2.9074	0.2126	0.26963
2.9079	0.21247	0.26947
2.9085	0.21235	0.26931
2.909	0.21222	0.26915
2.9096	0.2121	0.26899
2.9101	0.21197	0.26883
2.9106	0.21185	0.26867
2.9112	0.21172	0.26852
2.9117	0.2116	0.26836
2.9122	0.21148	0.2682
2.9128	0.21135	0.26805
2.9133	0.21123	0.26789
2.9138	0.21111	0.26773
2.9143	0.21099	0.26758
2.9149	0.21086	0.26742
2.9154	0.21074	0.26727
2.9159	0.21062	0.26711
2.9165	0.2105	0.26696
2.917	0.21038	0.2668
2.9175	0.21026	0.26665
2.918	0.21014	0.2665
2.9186	0.21002	0.26634
2.9191	0.2099	0.26619
2.9196	0.20977	0.26604
2.9201	0.20965	0.26588
2.9206	0.20954	0.26573
2.9212	0.20942	0.26558
2.9217	0.2093	0.26543
2.9222	0.20918	0.26528
2.9227	0.20906	0.26513
2.9232	0.20894	0.26497
2.9238	0.20882	0.26482
2.9243	0.2087	0.26467
2.9248	0.20858	0.26452
2.9253	0.20847	0.26437
2.9258	0.20835	0.26422
2.9263	0.20823	0.26407
2.9269	0.20811	0.26392
2.9274	0.208	0.26378
2.9279	0.20788	0.26363
2.9284	0.20776	0.26348
2.9289	0.20765	0.26333
2.9294	0.20753	0.26318
2.9299	0.20741	0.26303
2.9304	0.2073	0.26289
2.9309	0.20718	0.26274
2.9315	0.20707	0.26259
2.932	0.20695	0.26245
2.9325	0.20684	0.2623
2.933	0.20672	0.26215
2.9335	0.20661	0.26201
2.934	0.20649	0.26186
2.9345	0.20638	0.26172
2.935	0.20626	0.26157
2.9355	0.20615	0.26143
2.936	0.20604	0.26128
2.9365	0.20592	0.26114
2.937	0.20581	0.26099
2.9375	0.2057	0.26085
2.938	0.20558	0.26071
2.9385	0.20547	0.26056
2.939	0.20536	0.26042
2.9395	0.20525	0.26028
2.94	0.20513	0.26013
2.9405	0.20502	0.25999
2.941	0.20491	0.25985
2.9415	0.2048	0.25971
2.942	0.20469	0.25957
2.9425	0.20458	0.25942
2.943	0.20447	0.25928
2.9435	0.20435	0.25914
2.944	0.20424	0.259
2.9445	0.20413	0.25886
2.945	0.20402	0.25872
2.9455	0.20391	0.25858
2.946	0.2038	0.25844
2.9465	0.20369	0.2583
2.9469	0.20358	0.25816
2.9474	0.20347	0.25802
2.9479	0.20336	0.25788
2.9484	0.20326	0.25775
2.9489	0.20315	0.25761
2.9494	0.20304	0.25747
2.9499	0.20293	0.25733
2.9504	0.20282	0.25719
2.9509	0.20271	0.25706
2.9513	0.20261	0.25692
2.9518	0.2025	0.25678
2.9523	0.20239	0.25664
2.9528	0.20228	0.25651
2.9533	0.20218	0.25637
2.9538	0.20207	0.25624
2.9542	0.20196	0.2561
2.9547	0.20186	0.25596
2.9552	0.20175	0.25583
2.9557	0.20164	0.25569
2.9562	0.20154	0.25556
2.9566	0.20143	0.25542
2.9571	0.20132	0.25529
2.9576	0.20122	0.25515
2.9581	0.20111	0.25502
2.9586	0.20101	0.25489
2.959	0.2009	0.25475
2.9595	0.2008	0.25462
2.96	0.20069	0.25449
2.9605	0.20059	0.25435
2.9609	0.20048	0.25422
2.9614	0.20038	0.25409
2.9619	0.20028	0.25395
2.9624	0.20017	0.25382
2.9628	0.20007	0.25369
2.9633	0.19996	0.25356
2.9638	0.19986	0.25343
2.9643	0.19976	0.2533
2.9647	0.19965	0.25316
2.9652	0.19955	0.25303
2.9657	0.19945	0.2529
2.9661	0.19935	0.25277
2.9666	0.19924	0.25264
2.9671	0.19914	0.25251
2.9675	0.19904	0.25238
2.968	0.19894	0.25225
2.9685	0.19883	0.25212
2.9689	0.19873	0.25199
2.9694	0.19863	0.25186
2.9699	0.19853	0.25174
2.9703	0.19843	0.25161
2.9708	0.19833	0.25148
2.9713	0.19823	0.25135
2.9717	0.19813	0.25122
2.9722	0.19803	0.25109
2.9727	0.19793	0.25097
2.9731	0.19783	0.25084
2.9736	0.19773	0.25071
2.9741	0.19763	0.25058
2.9745	0.19753	0.25046
2.975	0.19743	0.25033
2.9754	0.19733	0.2502
2.9759	0.19723	0.25008
2.9763	0.19713	0.24995
2.9768	0.19703	0.24983
2.9773	0.19693	0.2497
2.9777	0.19683	0.24957
2.9782	0.19673	0.24945
2.9786	0.19664	0.24932
2.9791	0.19654	0.2492
2.9795	0.19644	0.24907
2.98	0.19634	0.24895
2.9805	0.19624	0.24883
2.9809	0.19615	0.2487
2.9814	0.19605	0.24858
2.9818	0.19595	0.24845
2.9823	0.19585	0.24833
2.9827	0.19576	0.24821
2.9832	0.19566	0.24808
2.9836	0.19556	0.24796
2.9841	0.19547	0.24784
2.9845	0.19537	0.24772
2.985	0.19527	0.24759
2.9854	0.19518	0.24747
2.9859	0.19508	0.24735
2.9863	0.19499	0.24723
2.9868	0.19489	0.24711
2.9872	0.19479	0.24698
2.9877	0.1947	0.24686
2.9881	0.1946	0.24674
2.9886	0.19451	0.24662
2.989	0.19441	0.2465
2.9894	0.19432	0.24638
2.9899	0.19422	0.24626
2.9903	0.19413	0.24614
2.9908	0.19404	0.24602
2.9912	0.19394	0.2459
2.9917	0.19385	0.24578
2.9921	0.19375	0.24566
2.9926	0.19366	0.24554
2.993	0.19357	0.24542
2.9934	0.19347	0.2453
2.9939	0.19338	0.24518
2.9943	0.19329	0.24506
2.9948	0.19319	0.24495
2.9952	0.1931	0.24483
2.9956	0.19301	0.24471
2.9961	0.19291	0.24459
2.9965	0.19282	0.24447
2.9969	0.19273	0.24436
2.9974	0.19264	0.24424
2.9978	0.19254	0.24412
2.9983	0.19245	0.24401
2.9987	0.19236	0.24389
2.9991	0.19227	0.24377
2.9996	0.19218	0.24366
3	0.19209	0.24354
3.0004	0.19199	0.24342
3.0009	0.1919	0.24331
3.0013	0.19181	0.24319
3.0017	0.19172	0.24308
3.0022	0.19163	0.24296
3.0026	0.19154	0.24284
3.003	0.19145	0.24273
3.0035	0.19136	0.24261
3.0039	0.19127	0.2425
3.0043	0.19118	0.24239
3.0048	0.19109	0.24227
3.0052	0.191	0.24216
3.0056	0.19091	0.24204
3.006	0.19082	0.24193
3.0065	0.19073	0.24181
3.0069	0.19064	0.2417
3.0073	0.19055	0.24159
3.0077	0.19046	0.24147
3.0082	0.19037	0.24136
3.0086	0.19028	0.24125
3.009	0.1902	0.24114
3.0095	0.19011	0.24102
3.0099	0.19002	0.24091
3.0103	0.18993	0.2408
3.0107	0.18984	0.24069
3.0111	0.18975	0.24057
3.0116	0.18967	0.24046
3.012	0.18958	0.24035
3.0124	0.18949	0.24024
3.0128	0.1894	0.24013
3.0133	0.18932	0.24002
3.0137	0.18923	0.2399
3.0141	0.18914	0.23979
3.0145	0.18905	0.23968
3.0149	0.18897	0.23957
3.0154	0.18888	0.23946
3.0158	0.18879	0.23935
3.0162	0.18871	0.23924
3.0166	0.18862	0.23913
3.017	0.18853	0.23902
3.0175	0.18845	0.23891
3.0179	0.18836	0.2388
3.0183	0.18828	0.23869
3.0187	0.18819	0.23858
3.0191	0.1881	0.23848
3.0195	0.18802	0.23837
3.0199	0.18793	0.23826
3.0204	0.18785	0.23815
3.0208	0.18776	0.23804
3.0212	0.18768	0.23793
3.0216	0.18759	0.23783
3.022	0.18751	0.23772
3.0224	0.18742	0.23761
3.0228	0.18734	0.2375
3.0233	0.18725	0.23739
3.0237	0.18717	0.23729
3.0241	0.18709	0.23718
3.0245	0.187	0.23707
3.0249	0.18692	0.23697
3.0253	0.18683	0.23686
3.0257	0.18675	0.23675
3.0261	0.18667	0.23665
3.0265	0.18658	0.23654
3.0269	0.1865	0.23643
3.0273	0.18642	0.23633
3.0278	0.18633	0.23622
3.0282	0.18625	0.23612
3.0286	0.18617	0.23601
3.029	0.18608	0.23591
3.0294	0.186	0.2358
3.0298	0.18592	0.23569
3.0302	0.18583	0.23559
3.0306	0.18575	0.23549
3.031	0.18567	0.23538
3.0314	0.18559	0.23528
3.0318	0.18551	0.23517
3.0322	0.18542	0.23507
3.0326	0.18534	0.23496
3.033	0.18526	0.23486
3.0334	0.18518	0.23476
3.0338	0.1851	0.23465
3.0342	0.18502	0.23455
3.0346	0.18493	0.23444
3.035	0.18485	0.23434
3.0354	0.18477	0.23424
3.0358	0.18469	0.23414
3.0362	0.18461	0.23403
3.0366	0.18453	0.23393
3.037	0.18445	0.23383
3.0374	0.18437	0.23372
3.0378	0.18429	0.23362
3.0382	0.18421	0.23352
3.0386	0.18413	0.23342
3.039	0.18405	0.23332
3.0394	0.18397	0.23321
3.0398	0.18389	0.23311
3.0402	0.18381	0.23301
3.0406	0.18373	0.23291
3.041	0.18365	0.23281
3.0414	0.18357	0.23271
3.0418	0.18349	0.23261
3.0422	0.18341	0.23251
3.0426	0.18333	0.23241
3.043	0.18325	0.23231
3.0434	0.18317	0.23221
3.0438	0.18309	0.2321
3.0441	0.18302	0.232
3.0445	0.18294	0.2319
3.0449	0.18286	0.23181
3.0453	0.18278	0.23171
3.0457	0.1827	0.23161
3.0461	0.18262	0.23151
3.0465	0.18255	0.23141
3.0469	0.18247	0.23131
3.0473	0.18239	0.23121
3.0477	0.18231	0.23111
3.0481	0.18223	0.23101
3.0484	0.18216	0.23091
3.0488	0.18208	0.23081
3.0492	0.182	0.23072
3.0496	0.18192	0.23062
3.05	0.18185	0.23052
3.0504	0.18177	0.23042
3.0508	0.18169	0.23032
3.0512	0.18162	0.23023
3.0515	0.18154	0.23013
3.0519	0.18146	0.23003
3.0523	0.18139	0.22993
3.0527	0.18131	0.22984
3.0531	0.18123	0.22974
3.0535	0.18116	0.22964
3.0538	0.18108	0.22955
3.0542	0.181	0.22945
3.0546	0.18093	0.22935
3.055	0.18085	0.22926
3.0554	0.18078	0.22916
3.0558	0.1807	0.22906
3.0561	0.18063	0.22897
3.0565	0.18055	0.22887
3.0569	0.18047	0.22877
3.0573	0.1804	0.22868
3.0577	0.18032	0.22858
3.058	0.18025	0.22849
3.0584	0.18017	0.22839
3.0588	0.1801	0.2283
3.0592	0.18002	0.2282
3.0596	0.17995	0.22811
3.0599	0.17988	0.22801
3.0603	0.1798	0.22792
3.0607	0.17973	0.22782
3.0611	0.17965	0.22773
3.0615	0.17958	0.22763
3.0618	0.1795	0.22754
3.0622	0.17943	0.22745
3.0626	0.17936	0.22735
3.063	0.17928	0.22726
3.0633	0.17921	0.22716
3.0637	0.17913	0.22707
3.0641	0.17906	0.22698
3.0645	0.17899	0.22688
3.0648	0.17891	0.22679
3.0652	0.17884	0.2267
3.0656	0.17877	0.2266
3.066	0.17869	0.22651
3.0663	0.17862	0.22642
3.0667	0.17855	0.22633
3.0671	0.17848	0.22623
3.0674	0.1784	0.22614
3.0678	0.17833	0.22605
3.0682	0.17826	0.22596
3.0686	0.17819	0.22586
3.0689	0.17811	0.22577
3.0693	0.17804	0.22568
3.0697	0.17797	0.22559
3.07	0.1779	0.2255
3.0704	0.17782	0.2254
3.0708	0.17775	0.22531
3.0711	0.17768	0.22522
3.0715	0.17761	0.22513
3.0719	0.17754	0.22504
3.0722	0.17747	0.22495
3.0726	0.17739	0.22486
3.073	0.17732	0.22477
3.0734	0.17725	0.22468
3.0737	0.17718	0.22459
3.0741	0.17711	0.2245
3.0745	0.17704	0.22441
3.0748	0.17697	0.22432
3.0752	0.1769	0.22423
3.0755	0.17683	0.22414
3.0759	0.17676	0.22405
3.0763	0.17668	0.22396
3.0766	0.17661	0.22387
3.077	0.17654	0.22378
3.0774	0.17647	0.22369
3.0777	0.1764	0.2236
3.0781	0.17633	0.22351
3.0785	0.17626	0.22342
3.0788	0.17619	0.22333
3.0792	0.17612	0.22324
3.0795	0.17605	0.22315
3.0799	0.17598	0.22306
3.0803	0.17591	0.22298
3.0806	0.17584	0.22289
3.081	0.17578	0.2228
3.0813	0.17571	0.22271
3.0817	0.17564	0.22262
3.0821	0.17557	0.22254
3.0824	0.1755	0.22245
3.0828	0.17543	0.22236
3.0831	0.17536	0.22227
3.0835	0.17529	0.22218
3.0839	0.17522	0.2221
3.0842	0.17515	0.22201
3.0846	0.17509	0.22192
3.0849	0.17502	0.22184
3.0853	0.17495	0.22175
3.0856	0.17488	0.22166
3.086	0.17481	0.22157
3.0864	0.17474	0.22149
3.0867	0.17468	0.2214
3.0871	0.17461	0.22131
3.0874	0.17454	0.22123
3.0878	0.17447	0.22114
3.0881	0.1744	0.22106
3.0885	0.17434	0.22097
3.0888	0.17427	0.22088
3.0892	0.1742	0.2208
3.0896	0.17413	0.22071
3.0899	0.17407	0.22063
3.0903	0.174	0.22054
3.0906	0.17393	0.22046
3.091	0.17386	0.22037
3.0913	0.1738	0.22028
3.0917	0.17373	0.2202
3.092	0.17366	0.22011
3.0924	0.1736	0.22003
3.0927	0.17353	0.21994
3.0931	0.17346	0.21986
3.0934	0.1734	0.21978
3.0938	0.17333	0.21969
3.0941	0.17326	0.21961
3.0945	0.1732	0.21952
3.0948	0.17313	0.21944
3.0952	0.17306	0.21935
3.0955	0.173	0.21927
3.0959	0.17293	0.21919
3.0962	0.17287	0.2191
3.0966	0.1728	0.21902
3.0969	0.17274	0.21893
3.0973	0.17267	0.21885
3.0976	0.1726	0.21877
3.098	0.17254	0.21868
3.0983	0.17247	0.2186
3.0986	0.17241	0.21852
3.099	0.17234	0.21843
3.0993	0.17228	0.21835
3.0997	0.17221	0.21827
3.1	0.17215	0.21819
3.1004	0.17208	0.2181
3.1007	0.17202	0.21802
3.1011	0.17195	0.21794
3.1014	0.17189	0.21786
3.1017	0.17182	0.21777
3.1021	0.17176	0.21769
3.1024	0.17169	0.21761
3.1028	0.17163	0.21753
3.1031	0.17156	0.21745
3.1035	0.1715	0.21736
3.1038	0.17144	0.21728
3.1041	0.17137	0.2172
3.1045	0.17131	0.21712
3.1048	0.17124	0.21704
3.1052	0.17118	0.21696
3.1055	0.17111	0.21687
3.1059	0.17105	0.21679
3.1062	0.17099	0.21671
3.1065	0.17092	0.21663
3.1069	0.17086	0.21655
3.1072	0.1708	0.21647
3.1075	0.17073	0.21639
3.1079	0.17067	0.21631
3.1082	0.17061	0.21623
3.1086	0.17054	0.21615
3.1089	0.17048	0.21607
3.1092	0.17042	0.21599
3.1096	0.17035	0.21591
3.1099	0.17029	0.21583
3.1103	0.17023	0.21575
3.1106	0.17017	0.21567
3.1109	0.1701	0.21559
3.1113	0.17004	0.21551
3.1116	0.16998	0.21543
3.1119	0.16991	0.21535
3.1123	0.16985	0.21527
3.1126	0.16979	0.21519
3.1129	0.16973	0.21511
3.1133	0.16967	0.21503
3.1136	0.1696	0.21495
3.1139	0.16954	0.21487
3.1143	0.16948	0.2148
3.1146	0.16942	0.21472
3.1149	0.16936	0.21464
3.1153	0.16929	0.21456
3.1156	0.16923	0.21448
3.1159	0.16917	0.2144
3.1163	0.16911	0.21432
3.1166	0.16905	0.21425
3.1169	0.16899	0.21417
3.1173	0.16892	0.21409
3.1176	0.16886	0.21401
3.1179	0.1688	0.21393
3.1183	0.16874	0.21386
3.1186	0.16868	0.21378
3.1189	0.16862	0.2137
3.1193	0.16856	0.21362
3.1196	0.1685	0.21355
3.1199	0.16844	0.21347
3.1202	0.16837	0.21339
3.1206	0.16831	0.21331
3.1209	0.16825	0.21324
3.1212	0.16819	0.21316
3.1216	0.16813	0.21308
3.1219	0.16807	0.21301
3.1222	0.16801	0.21293
3.1225	0.16795	0.21285
3.1229	0.16789	0.21278
3.1232	0.16783	0.2127
3.1235	0.16777	0.21262
3.1239	0.16771	0.21255
3.1242	0.16765	0.21247
3.1245	0.16759	0.21239
3.1248	0.16753	0.21232
3.1252	0.16747	0.21224
3.1255	0.16741	0.21217
3.1258	0.16735	0.21209
3.1261	0.16729	0.21202
3.1265	0.16723	0.21194
3.1268	0.16717	0.21186
3.1271	0.16711	0.21179
3.1274	0.16705	0.21171
3.1278	0.167	0.21164
3.1281	0.16694	0.21156
3.1284	0.16688	0.21149
3.1287	0.16682	0.21141
3.129	0.16676	0.21134
3.1294	0.1667	0.21126
3.1297	0.16664	0.21119
3.13	0.16658	0.21111
3.1303	0.16652	0.21104
3.1307	0.16646	0.21096
3.131	0.16641	0.21089
3.1313	0.16635	0.21081
3.1316	0.16629	0.21074
3.1319	0.16623	0.21067
3.1323	0.16617	0.21059
3.1326	0.16611	0.21052
3.1329	0.16606	0.21044
3.1332	0.166	0.21037
3.1335	0.16594	0.2103
3.1339	0.16588	0.21022
3.1342	0.16582	0.21015
3.1345	0.16577	0.21008
3.1348	0.16571	0.21
3.1351	0.16565	0.20993
3.1355	0.16559	0.20985
3.1358	0.16553	0.20978
3.1361	0.16548	0.20971
3.1364	0.16542	0.20964
3.1367	0.16536	0.20956
3.137	0.1653	0.20949
3.1374	0.16525	0.20942
3.1377	0.16519	0.20934
3.138	0.16513	0.20927
3.1383	0.16508	0.2092
3.1386	0.16502	0.20913
3.1389	0.16496	0.20905
3.1392	0.1649	0.20898
3.1396	0.16485	0.20891
3.1399	0.16479	0.20884
3.1402	0.16473	0.20876
3.1405	0.16468	0.20869
3.1408	0.16462	0.20862
3.1411	0.16456	0.20855
3.1414	0.16451	0.20848
3.1418	0.16445	0.2084
3.1421	0.16439	0.20833
3.1424	0.16434	0.20826
3.1427	0.16428	0.20819
3.143	0.16423	0.20812
3.1433	0.16417	0.20805
3.1436	0.16411	0.20797
3.144	0.16406	0.2079
3.1443	0.164	0.20783
3.1446	0.16395	0.20776
3.1449	0.16389	0.20769
3.1452	0.16383	0.20762
3.1455	0.16378	0.20755
3.1458	0.16372	0.20748
3.1461	0.16367	0.20741
3.1464	0.16361	0.20734
3.1467	0.16356	0.20727
3.1471	0.1635	0.20719
3.1474	0.16344	0.20712
3.1477	0.16339	0.20705
3.148	0.16333	0.20698
3.1483	0.16328	0.20691
3.1486	0.16322	0.20684
3.1489	0.16317	0.20677
3.1492	0.16311	0.2067
3.1495	0.16306	0.20663
3.1498	0.163	0.20656
3.1501	0.16295	0.20649
3.1504	0.16289	0.20642
3.1508	0.16284	0.20635
3.1511	0.16278	0.20628
3.1514	0.16273	0.20622
3.1517	0.16267	0.20615
3.152	0.16262	0.20608
3.1523	0.16257	0.20601
3.1526	0.16251	0.20594
3.1529	0.16246	0.20587
3.1532	0.1624	0.2058
3.1535	0.16235	0.20573
3.1538	0.16229	0.20566
3.1541	0.16224	0.20559
3.1544	0.16219	0.20552
3.1547	0.16213	0.20546
3.155	0.16208	0.20539
3.1553	0.16202	0.20532
3.1556	0.16197	0.20525
3.1559	0.16192	0.20518
3.1562	0.16186	0.20511
3.1565	0.16181	0.20504
3.1569	0.16175	0.20498
3.1572	0.1617	0.20491
3.1575	0.16165	0.20484
3.1578	0.16159	0.20477
3.1581	0.16154	0.2047
3.1584	0.16149	0.20464
3.1587	0.16143	0.20457
3.159	0.16138	0.2045
3.1593	0.16133	0.20443
3.1596	0.16127	0.20437
3.1599	0.16122	0.2043
3.1602	0.16117	0.20423
3.1605	0.16111	0.20416
3.1608	0.16106	0.2041
3.1611	0.16101	0.20403
3.1614	0.16096	0.20396
3.1617	0.1609	0.20389
3.162	0.16085	0.20383
3.1623	0.1608	0.20376
3.1626	0.16075	0.20369
3.1629	0.16069	0.20363
3.1632	0.16064	0.20356
3.1635	0.16059	0.20349
3.1638	0.16054	0.20343
3.1641	0.16048	0.20336
3.1644	0.16043	0.20329
3.1647	0.16038	0.20323
3.1649	0.16033	0.20316
3.1652	0.16027	0.20309
3.1655	0.16022	0.20303
3.1658	0.16017	0.20296
3.1661	0.16012	0.2029
3.1664	0.16007	0.20283
3.1667	0.16001	0.20276
3.167	0.15996	0.2027
3.1673	0.15991	0.20263
3.1676	0.15986	0.20257
3.1679	0.15981	0.2025
3.1682	0.15976	0.20244
3.1685	0.1597	0.20237
3.1688	0.15965	0.2023
3.1691	0.1596	0.20224
3.1694	0.15955	0.20217
3.1697	0.1595	0.20211
3.17	0.15945	0.20204
3.1703	0.1594	0.20198
3.1706	0.15934	0.20191
3.1708	0.15929	0.20185
3.1711	0.15924	0.20178
3.1714	0.15919	0.20172
3.1717	0.15914	0.20165
3.172	0.15909	0.20159
3.1723	0.15904	0.20152
3.1726	0.15899	0.20146
3.1729	0.15894	0.20139
3.1732	0.15889	0.20133
3.1735	0.15883	0.20127
3.1738	0.15878	0.2012
3.1741	0.15873	0.20114
3.1744	0.15868	0.20107
3.1746	0.15863	0.20101
3.1749	0.15858	0.20094
3.1752	0.15853	0.20088
3.1755	0.15848	0.20082
3.1758	0.15843	0.20075
3.1761	0.15838	0.20069
3.1764	0.15833	0.20062
3.1767	0.15828	0.20056
3.177	0.15823	0.2005
3.1772	0.15818	0.20043
3.1775	0.15813	0.20037
3.1778	0.15808	0.20031
3.1781	0.15803	0.20024
3.1784	0.15798	0.20018
3.1787	0.15793	0.20012
3.179	0.15788	0.20005
3.1793	0.15783	0.19999
3.1796	0.15778	0.19993
3.1798	0.15773	0.19986
3.1801	0.15768	0.1998
3.1804	0.15763	0.19974
3.1807	0.15758	0.19967
3.181	0.15753	0.19961
3.1813	0.15748	0.19955
3.1816	0.15743	0.19949
3.1818	0.15739	0.19942
3.1821	0.15734	0.19936
3.1824	0.15729	0.1993
3.1827	0.15724	0.19924
3.183	0.15719	0.19917
3.1833	0.15714	0.19911
3.1836	0.15709	0.19905
3.1838	0.15704	0.19899
3.1841	0.15699	0.19892
3.1844	0.15694	0.19886
3.1847	0.1569	0.1988
3.185	0.15685	0.19874
3.1853	0.1568	0.19868
3.1855	0.15675	0.19861
3.1858	0.1567	0.19855
3.1861	0.15665	0.19849
3.1864	0.1566	0.19843
3.1867	0.15655	0.19837
3.187	0.15651	0.19831
3.1872	0.15646	0.19824
3.1875	0.15641	0.19818
3.1878	0.15636	0.19812
3.1881	0.15631	0.19806
3.1884	0.15626	0.198
3.1886	0.15622	0.19794
3.1889	0.15617	0.19788
3.1892	0.15612	0.19782
3.1895	0.15607	0.19775
3.1898	0.15602	0.19769
3.1901	0.15598	0.19763
3.1903	0.15593	0.19757
3.1906	0.15588	0.19751
3.1909	0.15583	0.19745
3.1912	0.15579	0.19739
3.1915	0.15574	0.19733
3.1917	0.15569	0.19727
3.192	0.15564	0.19721
3.1923	0.15559	0.19715
3.1926	0.15555	0.19709
3.1928	0.1555	0.19703
3.1931	0.15545	0.19697
3.1934	0.1554	0.19691
3.1937	0.15536	0.19685
3.194	0.15531	0.19679
3.1942	0.15526	0.19673
3.1945	0.15522	0.19667
3.1948	0.15517	0.19661
3.1951	0.15512	0.19655
3.1953	0.15507	0.19649
3.1956	0.15503	0.19643
3.1959	0.15498	0.19637
3.1962	0.15493	0.19631
3.1965	0.15489	0.19625
3.1967	0.15484	0.19619
3.197	0.15479	0.19613
3.1973	0.15475	0.19607
3.1976	0.1547	0.19601
3.1978	0.15465	0.19595
3.1981	0.15461	0.19589
3.1984	0.15456	0.19583
3.1987	0.15451	0.19577
3.1989	0.15447	0.19571
3.1992	0.15442	0.19565
3.1995	0.15437	0.19559
3.1998	0.15433	0.19554
3.2	0.15428	0.19548
3.2003	0.15423	0.19542
3.2006	0.15419	0.19536
3.2009	0.15414	0.1953
3.2011	0.1541	0.19524
3.2014	0.15405	0.19518
3.2017	0.154	0.19512
3.2019	0.15396	0.19507
3.2022	0.15391	0.19501
3.2025	0.15387	0.19495
3.2028	0.15382	0.19489
3.203	0.15377	0.19483
3.2033	0.15373	0.19477
3.2036	0.15368	0.19472
3.2038	0.15364	0.19466
3.2041	0.15359	0.1946
3.2044	0.15354	0.19454
3.2047	0.1535	0.19448
3.2049	0.15345	0.19443
3.2052	0.15341	0.19437
3.2055	0.15336	0.19431
3.2057	0.15332	0.19425
3.206	0.15327	0.1942
3.2063	0.15323	0.19414
3.2066	0.15318	0.19408
3.2068	0.15314	0.19402
3.2071	0.15309	0.19396
3.2074	0.15305	0.19391
3.2076	0.153	0.19385
3.2079	0.15296	0.19379
3.2082	0.15291	0.19374
3.2084	0.15286	0.19368
3.2087	0.15282	0.19362
3.209	0.15278	0.19356
3.2092	0.15273	0.19351
3.2095	0.15269	0.19345
3.2098	0.15264	0.19339
3.2101	0.1526	0.19334
3.2103	0.15255	0.19328
3.2106	0.15251	0.19322
3.2109	0.15246	0.19317
3.2111	0.15242	0.19311
3.2114	0.15237	0.19305
3.2117	0.15233	0.193
3.2119	0.15228	0.19294
3.2122	0.15224	0.19288
3.2125	0.15219	0.19283
3.2127	0.15215	0.19277
3.213	0.15211	0.19271
3.2133	0.15206	0.19266
3.2135	0.15202	0.1926
3.2138	0.15197	0.19254
3.214	0.15193	0.19249
3.2143	0.15188	0.19243
3.2146	0.15184	0.19238
3.2148	0.1518	0.19232
3.2151	0.15175	0.19226
3.2154	0.15171	0.19221
3.2156	0.15166	0.19215
3.2159	0.15162	0.1921
3.2162	0.15158	0.19204
3.2164	0.15153	0.19199
3.2167	0.15149	0.19193
3.217	0.15145	0.19187
3.2172	0.1514	0.19182
3.2175	0.15136	0.19176
3.2177	0.15131	0.19171
3.218	0.15127	0.19165
3.2183	0.15123	0.1916
3.2185	0.15118	0.19154
3.2188	0.15114	0.19149
3.2191	0.1511	0.19143
3.2193	0.15105	0.19138
3.2196	0.15101	0.19132
3.2198	0.15097	0.19127
3.2201	0.15092	0.19121
3.2204	0.15088	0.19116
3.2206	0.15084	0.1911
3.2209	0.15079	0.19105
3.2212	0.15075	0.19099
3.2214	0.15071	0.19094
3.2217	0.15066	0.19088
3.2219	0.15062	0.19083
3.2222	0.15058	0.19077
3.2225	0.15054	0.19072
3.2227	0.15049	0.19066
3.223	0.15045	0.19061
3.2232	0.15041	0.19055
3.2235	0.15036	0.1905
3.2238	0.15032	0.19045
3.224	0.15028	0.19039
3.2243	0.15024	0.19034
3.2245	0.15019	0.19028
3.2248	0.15015	0.19023
3.2251	0.15011	0.19017
3.2253	0.15007	0.19012
3.2256	0.15002	0.19007
3.2258	0.14998	0.19001
3.2261	0.14994	0.18996
3.2263	0.1499	0.18991
3.2266	0.14985	0.18985
3.2269	0.14981	0.1898
3.2271	0.14977	0.18974
3.2274	0.14973	0.18969
3.2276	0.14968	0.18964
3.2279	0.14964	0.18958
3.2281	0.1496	0.18953
3.2284	0.14956	0.18948
3.2287	0.14952	0.18942
3.2289	0.14947	0.18937
3.2292	0.14943	0.18932
3.2294	0.14939	0.18926
3.2297	0.14935	0.18921
3.2299	0.14931	0.18916
3.2302	0.14926	0.1891
3.2304	0.14922	0.18905
3.2307	0.14918	0.189
3.231	0.14914	0.18894
3.2312	0.1491	0.18889
3.2315	0.14906	0.18884
3.2317	0.14901	0.18879
3.232	0.14897	0.18873
3.2322	0.14893	0.18868
3.2325	0.14889	0.18863
3.2327	0.14885	0.18857
3.233	0.14881	0.18852
3.2333	0.14877	0.18847
3.2335	0.14872	0.18842
3.2338	0.14868	0.18836
3.234	0.14864	0.18831
3.2343	0.1486	0.18826
3.2345	0.14856	0.18821
3.2348	0.14852	0.18815
3.235	0.14848	0.1881
3.2353	0.14844	0.18805
3.2355	0.14839	0.188
3.2358	0.14835	0.18795
3.236	0.14831	0.18789
3.2363	0.14827	0.18784
3.2365	0.14823	0.18779
3.2368	0.14819	0.18774
3.237	0.14815	0.18769
3.2373	0.14811	0.18763
3.2375	0.14807	0.18758
3.2378	0.14803	0.18753
3.238	0.14799	0.18748
3.2383	0.14795	0.18743
3.2385	0.1479	0.18737
3.2388	0.14786	0.18732
3.239	0.14782	0.18727
3.2393	0.14778	0.18722
3.2395	0.14774	0.18717
3.2398	0.1477	0.18712
3.24	0.14766	0.18707
3.2403	0.14762	0.18701
3.2405	0.14758	0.18696
3.2408	0.14754	0.18691
3.241	0.1475	0.18686
3.2413	0.14746	0.18681
3.2415	0.14742	0.18676
3.2418	0.14738	0.18671
3.242	0.14734	0.18666
3.2423	0.1473	0.18661
3.2425	0.14726	0.18655
3.2428	0.14722	0.1865
3.243	0.14718	0.18645
3.2433	0.14714	0.1864
3.2435	0.1471	0.18635
3.2438	0.14706	0.1863
3.244	0.14702	0.18625
3.2443	0.14698	0.1862
3.2445	0.14694	0.18615
3.2448	0.1469	0.1861
3.245	0.14686	0.18605
3.2453	0.14682	0.186
3.2455	0.14678	0.18595
3.2458	0.14674	0.1859
3.246	0.1467	0.18585
3.2463	0.14666	0.18579
3.2465	0.14662	0.18574
3.2467	0.14658	0.18569
3.247	0.14654	0.18564
3.2472	0.1465	0.18559
3.2475	0.14646	0.18554
3.2477	0.14642	0.18549
3.248	0.14638	0.18544
3.2482	0.14635	0.18539
3.2485	0.14631	0.18534
3.2487	0.14627	0.18529
3.249	0.14623	0.18524
3.2492	0.14619	0.18519
3.2494	0.14615	0.18514
3.2497	0.14611	0.18509
3.2499	0.14607	0.18505
3.2502	0.14603	0.185
3.2504	0.14599	0.18495
3.2507	0.14595	0.1849
3.2509	0.14592	0.18485
3.2512	0.14588	0.1848
3.2514	0.14584	0.18475
3.2516	0.1458	0.1847
3.2519	0.14576	0.18465
3.2521	0.14572	0.1846
3.2524	0.14568	0.18455
3.2526	0.14564	0.1845
3.2529	0.1456	0.18445
3.2531	0.14557	0.1844
3.2533	0.14553	0.18435
3.2536	0.14549	0.1843
3.2538	0.14545	0.18426
3.2541	0.14541	0.18421
3.2543	0.14537	0.18416
3.2545	0.14533	0.18411
3.2548	0.1453	0.18406
3.255	0.14526	0.18401
3.2553	0.14522	0.18396
3.2555	0.14518	0.18391
3.2558	0.14514	0.18386
3.256	0.1451	0.18382
3.2562	0.14507	0.18377
3.2565	0.14503	0.18372
3.2567	0.14499	0.18367
3.257	0.14495	0.18362
3.2572	0.14491	0.18357
3.2574	0.14487	0.18352
3.2577	0.14484	0.18348
3.2579	0.1448	0.18343
3.2582	0.14476	0.18338
3.2584	0.14472	0.18333
3.2586	0.14468	0.18328
3.2589	0.14465	0.18323
3.2591	0.14461	0.18319
3.2594	0.14457	0.18314
3.2596	0.14453	0.18309
3.2598	0.1445	0.18304
3.2601	0.14446	0.18299
3.2603	0.14442	0.18295
3.2605	0.14438	0.1829
3.2608	0.14434	0.18285
3.261	0.14431	0.1828
3.2613	0.14427	0.18276
3.2615	0.14423	0.18271
3.2617	0.14419	0.18266
3.262	0.14416	0.18261
3.2622	0.14412	0.18256
3.2625	0.14408	0.18252
3.2627	0.14404	0.18247
3.2629	0.14401	0.18242
3.2632	0.14397	0.18237
3.2634	0.14393	0.18233
3.2636	0.14389	0.18228
3.2639	0.14386	0.18223
3.2641	0.14382	0.18218
3.2643	0.14378	0.18214
3.2646	0.14375	0.18209
3.2648	0.14371	0.18204
3.2651	0.14367	0.182
3.2653	0.14363	0.18195
3.2655	0.1436	0.1819
3.2658	0.14356	0.18185
3.266	0.14352	0.18181
3.2662	0.14349	0.18176
3.2665	0.14345	0.18171
3.2667	0.14341	0.18167
3.2669	0.14337	0.18162
3.2672	0.14334	0.18157
3.2674	0.1433	0.18153
3.2676	0.14326	0.18148
3.2679	0.14323	0.18143
3.2681	0.14319	0.18139
3.2683	0.14315	0.18134
3.2686	0.14312	0.18129
3.2688	0.14308	0.18125
3.269	0.14304	0.1812
3.2693	0.14301	0.18115
3.2695	0.14297	0.18111
3.2697	0.14293	0.18106
3.27	0.1429	0.18101
3.2702	0.14286	0.18097
3.2704	0.14282	0.18092
3.2707	0.14279	0.18087
3.2709	0.14275	0.18083
3.2711	0.14272	0.18078
3.2714	0.14268	0.18073
3.2716	0.14264	0.18069
3.2718	0.14261	0.18064
3.2721	0.14257	0.1806
3.2723	0.14253	0.18055
3.2725	0.1425	0.1805
3.2728	0.14246	0.18046
3.273	0.14243	0.18041
3.2732	0.14239	0.18037
3.2735	0.14235	0.18032
3.2737	0.14232	0.18027
3.2739	0.14228	0.18023
3.2742	0.14224	0.18018
3.2744	0.14221	0.18014
3.2746	0.14217	0.18009
3.2749	0.14214	0.18005
3.2751	0.1421	0.18
3.2753	0.14207	0.17996
3.2755	0.14203	0.17991
3.2758	0.14199	0.17986
3.276	0.14196	0.17982
3.2762	0.14192	0.17977
3.2765	0.14189	0.17973
3.2767	0.14185	0.17968
3.2769	0.14181	0.17964
3.2772	0.14178	0.17959
3.2774	0.14174	0.17955
3.2776	0.14171	0.1795
3.2778	0.14167	0.17946
3.2781	0.14164	0.17941
3.2783	0.1416	0.17937
3.2785	0.14157	0.17932
3.2788	0.14153	0.17928
3.279	0.14149	0.17923
3.2792	0.14146	0.17919
3.2794	0.14142	0.17914
3.2797	0.14139	0.1791
3.2799	0.14135	0.17905
3.2801	0.14132	0.17901
3.2804	0.14128	0.17896
3.2806	0.14125	0.17892
3.2808	0.14121	0.17887
3.281	0.14118	0.17883
3.2813	0.14114	0.17878
3.2815	0.14111	0.17874
3.2817	0.14107	0.17869
3.2819	0.14104	0.17865
3.2822	0.141	0.1786
3.2824	0.14097	0.17856
3.2826	0.14093	0.17852
3.2828	0.1409	0.17847
3.2831	0.14086	0.17843
3.2833	0.14083	0.17838
3.2835	0.14079	0.17834
3.2838	0.14076	0.17829
3.284	0.14072	0.17825
3.2842	0.14069	0.1782
3.2844	0.14065	0.17816
3.2847	0.14062	0.17812
3.2849	0.14058	0.17807
3.2851	0.14055	0.17803
3.2853	0.14051	0.17798
3.2856	0.14048	0.17794
3.2858	0.14044	0.1779
3.286	0.14041	0.17785
3.2862	0.14038	0.17781
3.2865	0.14034	0.17776
3.2867	0.14031	0.17772
3.2869	0.14027	0.17768
3.2871	0.14024	0.17763
3.2874	0.1402	0.17759
3.2876	0.14017	0.17755
3.2878	0.14013	0.1775
3.288	0.1401	0.17746
3.2882	0.14007	0.17741
3.2885	0.14003	0.17737
3.2887	0.14	0.17733
3.2889	0.13996	0.17728
3.2891	0.13993	0.17724
3.2894	0.13989	0.1772
3.2896	0.13986	0.17715
3.2898	0.13983	0.17711
3.29	0.13979	0.17707
3.2903	0.13976	0.17702
3.2905	0.13972	0.17698
3.2907	0.13969	0.17694
3.2909	0.13966	0.17689
3.2911	0.13962	0.17685
3.2914	0.13959	0.17681
3.2916	0.13955	0.17676
3.2918	0.13952	0.17672
3.292	0.13949	0.17668
3.2923	0.13945	0.17663
3.2925	0.13942	0.17659
3.2927	0.13938	0.17655
3.2929	0.13935	0.17651
3.2931	0.13932	0.17646
3.2934	0.13928	0.17642
3.2936	0.13925	0.17638
3.2938	0.13922	0.17633
3.294	0.13918	0.17629
3.2942	0.13915	0.17625
3.2945	0.13911	0.17621
3.2947	0.13908	0.17616
3.2949	0.13905	0.17612
3.2951	0.13901	0.17608
3.2953	0.13898	0.17604
3.2956	0.13895	0.17599
3.2958	0.13891	0.17595
3.296	0.13888	0.17591
3.2962	0.13885	0.17587
3.2964	0.13881	0.17582
3.2967	0.13878	0.17578
3.2969	0.13875	0.17574
3.2971	0.13871	0.1757
3.2973	0.13868	0.17565
3.2975	0.13865	0.17561
3.2978	0.13861	0.17557
3.298	0.13858	0.17553
3.2982	0.13855	0.17549
3.2984	0.13851	0.17544
3.2986	0.13848	0.1754
3.2989	0.13845	0.17536
3.2991	0.13841	0.17532
3.2993	0.13838	0.17527
3.2995	0.13835	0.17523
3.2997	0.13832	0.17519
3.2999	0.13828	0.17515
3.3002	0.13825	0.17511
3.3004	0.13822	0.17507
3.3006	0.13818	0.17502
3.3008	0.13815	0.17498
[truncated: 98,001 more rows]

## Sheet: 6D
low CVs		high CVs		low CVs		low CVs
CV-control	CV-A+L	CV-control	CV-A+L	control1	control2	control1	control2
1.6764	1.8031	2.7655	1.5055	1.6894	1.6606	2.9334	2.9053
1.2316	1.5199	5.618	4.3305	1.2521	1.2127	5.8851	5.2043
1.4141	1.769	2.8934	2.1842	1.4148	1.4134	2.6713	2.869
1.4171	1.4588	4.4923	1.4728	1.4014	1.4315	4.4895	4.4853
1.6871	1.8269	2.6543	1.5199	1.7099	1.6654	2.5495	2.6584
1.7844	1.5792	2.1865	2.0875	1.8048	1.7551	2.1667	2.2055
1.4016	1.5947	2.4685	2.2783	1.4044	1.3977	2.4233	2.5125
1.0934	1.2496	2.5873	2.2088	1.0838	1.1018	2.6323	2.5397
1.6629	1.7211	2.3338	2.7544	1.6586	1.6661	2.3286	2.3094
1.4506	1.271	2.6525	2.6279	1.448	1.4529	2.6387	2.6598
1.5192	1.7639	2.8317	2.9211	1.5159	1.5132	2.8753	2.7921
0.86461	1.2007	2.671	2.6687	0.86278	0.86621	2.631	2.7019
0.96203	1.1135	2.4372	2.2253	0.92629	0.99179	2.4062	2.3484
1.444	1.6517	2.4116	2.3169	1.4669	1.4231	2.3749	2.4333
1.0603	1.6101	2.9868	2.7637	1.0488	1.0706	2.9642	2.9838
1.5797	1.7616	2.7706	2.2177	1.5902	1.5703	2.6906	2.8488
1.0135	1.2594	3.1493	1.8891	1.0042	1.0218	2.9104	4.1446
1.1464	1.623	3.9034	2.107	1.1192	1.1727	3.837	3.792
1.5658	1.7744	6.4213	2.7909	1.5583	1.5657	6.0278	6.7826
1.5632	1.7636	6.93	2.5596	1.569	1.5712	5.1989	7.133
1.4709	1.7653	4.5492	1.24	1.4791	1.46	4.5055	4.5913
1.4316	1.4957	2.0174	1.8096	1.4325	1.4304	1.9687	1.9876
1.7016	2.0243	2.9362	1.2688	1.7515	1.6397	2.8975	2.9234
1.1994	1.5013	2.1994	4.9151	1.2066	1.1893	2.3784	1.9352
1.4025	1.609	2.3518	2.6621	1.3889	1.4062	2.3126	2.3045
0.96504	1.0645	10.948	4.7138	0.95623	0.96998	10.927	10.91
1.3861	1.5598	4.9391	3.0664	1.3436	1.4134	3.9762	3.7219
1.1574	1.3548	2.9705	3.172	1.1717	1.1345	2.8358	3.0551
1.4312	1.9741	2.0769	2.2439	1.4144	1.4474	2.017	2.1075
1.0776	1.3666	4.7634	2.6863	1.0874	1.0685	4.8409	4.6577
1.5393	1.4738	2.0003	2.0768	1.5447	1.5342	1.9793	1.9886
0.74817	1.0547	2.8281	4.2363	0.75198	0.7446	2.5693	2.8916
1.2329	1.4756			1.2339	1.2279
1.19	0.79106			1.1433	1.2346
0.86745	1.0338			0.87255	0.85943
1.5687	1.3231			1.5965	1.5426
1.3694	3.5705			1.3424	1.3941
1.2645	0.74928			1.2075	1.3192
1.2877	1.5185			1.284	1.2912
1.6414	1.8355			1.635	1.6127
1.7011	1.7949			1.6658	1.6964
1.625	1.6441			1.5796	1.6689
1.6741	1.8698			1.6789	1.6686
1.1153	0.89534			1.11	1.1202
1.5137	1.4341			1.5153	1.512
1.9615	1.657			1.9762	1.9377
1.1813	1.5225			1.1652	1.1924
0.88621	1.1331			0.8738	0.88972
1.2292	1.3688			1.2164	1.2395
1.3743	1.6363			1.387	1.3604
1.3763	1.6698			1.3816	1.3711
1.0407	0.82084			1.0486	1.0309
1.2119	1.4532			1.1742	1.218
1.1245	1.3626			1.1265	1.1228
0.93027	1.0669			0.93979	0.90831
0.89805	1.4542			0.88802	0.90591
1.6395	1.4835			1.6187	1.6501
1.1803	1.4067			1.1866	1.1742
1.2654	1.4664			1.2461	1.2837
1.1942	1.6799			1.2097	1.1793
0.76647	1.1777			0.72373	0.69748
1.3883	1.6193			1.3947	1.3824
1.0248	1.0034			0.96481	1.0787
1.0576	1.0713			1.0458	1.0666
1.4388	1.5495			1.4593	1.405
1.0043	1.442			0.98554	1.0222
1.0911	0.71885			1.1097	1.0702
1.8722	2.2768			1.824	1.75
1.8248	1.9661			1.8148	1.8066
1.1192	1.2128			1.1287	1.1097
1.9946	1.2606			1.8505	2.148
1.0082	1.5254			1.0064	1.0082
1.2164	1.4424			1.2193	1.1945
0.98958	1.1278			0.98698	0.9921
1.2215	1.4058			1.2277	1.2151
1.2976	1.4855			1.2925	1.288
1.1966	2.7266			1.1827	1.2072
1.1315	1.3311			1.1142	1.1455
1.3924	1.4302			1.3604	1.4177
1.0282	1.787			0.96354	1.066
1.4289	1.7419			1.3933	1.4621
1.5618	1.7125			1.5476	1.5685
1.255	1.7041			1.2715	1.2399
0.94146	1.1006			0.93178	0.95053
1.4528	2.2278			1.3819	1.4796
1.008	1.226			1.0074	1.0078
0.81006	1.1281			0.78937	0.8215
0.93306	1.2391			0.92053	0.94457
0.93545	1.0622			0.9373	0.93032
1.6269	1.8629			1.6351	1.6186
1.646	1.6996			1.5851	1.6255
1.0642	0.70124			1.0624	1.0522
1.2132	1.2579			1.1997	1.2197
1.2403	1.1357			1.2218	1.258
1.5135	1.1616			1.5244	1.4975
1.7712	1.7948			1.747	1.7788
1.3894	1.5932			1.3871	1.3909
1.0553	1.0833			1.0579	1.0394
1.108	2.5042			1.0846	1.1144
0.92182	1.0803			0.91468	0.92647
1.3128	1.5948			1.3069	1.3181
1.3274	1.1869			1.3344	1.3211
1.6511	1.7132			1.547	1.7145
1.2755	1.4348			1.2771	1.2733
1.6114	1.2354			1.564	1.6402
1.0002	0.88572			1.0029	0.98723
1.2095	1.4555			1.2117	1.1833
1.3952	1.3888			1.3826	1.4073
1.2389	1.3793			1.2396	1.2374
0.91303	1.0491			0.90082	0.90506
0.99002	1.011			0.98484	0.98746
1.0464	1.2345			1.0444	1.0483
1.2427	1.4268			1.2205	1.2456
1.5989	1.6353			1.5972	1.5959
1.1812	1.3219			1.17	1.1822
1.5445	1.6332			1.5477	1.5413
1.0334	1.567			1.1032	0.95985
1.1488	1.3265			1.1356	1.1598
1.7393	1.4293			1.3019	1.8821
1.6916	1.9827			1.6956	1.6869
1.3428	1.6384			1.3335	1.3511
1.0575	1.0432			1.0424	1.0604
0.80583	1.0586			0.8121	0.79991
1.2471	1.3012			1.2247	1.2054
1.1653	1.3839			1.1464	1.1536
1.1698	1.2746			1.1684	1.1587
0.98768	1.0716			0.98598	0.98776
1.3821	1.2928			1.3572	1.4043
0.89232	1.1761			0.88804	0.89639
1.5685	1.8436			1.5509	1.5845
1.0196	1.1874			1.0188	1.0196
1.0273	1.2091			1.0101	1.0434
1.2192	1.9774			1.1985	1.235
1.7944	1.9473			1.7817	1.8065
1.7457	1.8491			1.765	1.7267
1.532	1.5755			1.5424	1.5211
1.6563	1.3406			1.728	1.5941
1.2463	1.2905			1.2334	1.2553
0.93705	1.0984			0.92672	0.94427
1.5222	1.5496			1.516	1.4973
1.2854	1.1719			1.2525	1.3161
1.2964	2.1524			1.3324	1.2634
1.2336	0.86163			1.2971	1.1581
1.9812	1.311			1.873	2.0169
1.2349	1.503			1.2494	1.2208
1.369	1.6122			1.3079	1.4225
1.3973	1.2138			0.98106	1.2584
1.2496	0.90526			0.83408	1.3863
1.3405	0.70971			1.3535	1.3242

## Sheet: 6E
low CVs		high CVs		high CVs with P300		high CVs with NfkB
CV-control	CV-A+L	CV-control	CV-A+L	CV-control	CV-A+L	CV-control	CV-A+L
1.6764	1.8031	2.7655	1.5055	2.7655	1.5055	2.7655	1.5055
1.2316	1.5199	5.618	4.3305	2.8934	2.1842	5.618	4.3305
1.4141	1.769	2.8934	2.1842	4.4923	1.4728	2.8934	2.1842
1.4171	1.4588	4.4923	1.4728	2.4116	2.3169	4.4923	1.4728
1.6871	1.8269	2.6543	1.5199	2.7706	2.2177	2.4116	2.3169
1.7844	1.5792	2.1865	2.0875	3.1493	1.8891	2.9868	2.7637
1.4016	1.5947	2.4685	2.2783	3.9034	2.107	2.7706	2.2177
1.0934	1.2496	2.5873	2.2088	6.4213	2.7909	3.1493	1.8891
1.6629	1.7211	2.3338	2.7544	6.93	2.5596	3.9034	2.107
1.4506	1.271	2.6525	2.6279	4.5492	1.24	6.4213	2.7909
1.5192	1.7639	2.8317	2.9211	2.0174	1.8096	6.93	2.5596
0.86461	1.2007	2.671	2.6687	2.9362	1.2688	4.5492	1.24
0.96203	1.1135	2.4372	2.2253	2.1994	4.9151	2.0174	1.8096
1.444	1.6517	2.4116	2.3169	2.3518	2.6621	2.9362	1.2688
1.0603	1.6101	2.9868	2.7637	10.948	4.7138	2.3518	2.6621
1.5797	1.7616	2.7706	2.2177	4.9391	3.0664	10.948	4.7138
1.0135	1.2594	3.1493	1.8891	2.9705	3.172	2.9705	3.172
1.1464	1.623	3.9034	2.107	2.0769	2.2439	2.0769	2.2439
1.5658	1.7744	6.4213	2.7909	2.0003	2.0768	2.0003	2.0768
1.5632	1.7636	6.93	2.5596
1.4709	1.7653	4.5492	1.24
1.4316	1.4957	2.0174	1.8096
1.7016	2.0243	2.9362	1.2688
1.1994	1.5013	2.1994	4.9151
1.4025	1.609	2.3518	2.6621
0.96504	1.0645	10.948	4.7138
1.3861	1.5598	4.9391	3.0664
1.1574	1.3548	2.9705	3.172
1.4312	1.9741	2.0769	2.2439
1.0776	1.3666	4.7634	2.6863
1.5393	1.4738	2.0003	2.0768
0.74817	1.0547	2.8281	4.2363
1.2329	1.4756
1.19	0.79106
0.86745	1.0338
1.5687	1.3231
1.3694	3.5705
1.2645	0.74928
1.2877	1.5185
1.6414	1.8355
1.7011	1.7949
1.625	1.6441
1.6741	1.8698
1.1153	0.89534
1.5137	1.4341
1.9615	1.657
1.1813	1.5225
0.88621	1.1331
1.2292	1.3688
1.3743	1.6363
1.3763	1.6698
1.0407	0.82084
1.2119	1.4532
1.1245	1.3626
0.93027	1.0669
0.89805	1.4542
1.6395	1.4835
1.1803	1.4067
1.2654	1.4664
1.1942	1.6799
0.76647	1.1777
1.3883	1.6193
1.0248	1.0034
1.0576	1.0713
1.4388	1.5495
1.0043	1.442
1.0911	0.71885
1.8722	2.2768
1.8248	1.9661
1.1192	1.2128
1.9946	1.2606
1.0082	1.5254
1.2164	1.4424
0.98958	1.1278
1.2215	1.4058
1.2976	1.4855
1.1966	2.7266
1.1315	1.3311
1.3924	1.4302
1.0282	1.787
1.4289	1.7419
1.5618	1.7125
1.255	1.7041
0.94146	1.1006
1.4528	2.2278
1.008	1.226
0.81006	1.1281
0.93306	1.2391
0.93545	1.0622
1.6269	1.8629
1.646	1.6996
1.0642	0.70124
1.2132	1.2579
1.2403	1.1357
1.5135	1.1616
1.7712	1.7948
1.3894	1.5932
1.0553	1.0833
1.108	2.5042
0.92182	1.0803
1.3128	1.5948
1.3274	1.1869
1.6511	1.7132
1.2755	1.4348
1.6114	1.2354
1.0002	0.88572
1.2095	1.4555
1.3952	1.3888
1.2389	1.3793
0.91303	1.0491
0.99002	1.011
1.0464	1.2345
1.2427	1.4268
1.5989	1.6353
1.1812	1.3219
1.5445	1.6332
1.0334	1.567
1.1488	1.3265
1.7393	1.4293
1.6916	1.9827
1.3428	1.6384
1.0575	1.0432
0.80583	1.0586
1.2471	1.3012
1.1653	1.3839
1.1698	1.2746
0.98768	1.0716
1.3821	1.2928
0.89232	1.1761
1.5685	1.8436
1.0196	1.1874
1.0273	1.2091
1.2192	1.9774
1.7944	1.9473
1.7457	1.8491
1.532	1.5755
1.6563	1.3406
1.2463	1.2905
0.93705	1.0984
1.5222	1.5496
1.2854	1.1719
1.2964	2.1524
1.2336	0.86163
1.9812	1.311
1.2349	1.503
1.369	1.6122
1.3973	1.2138
1.2496	0.90526
1.3405	0.70971

## Sheet: 6F
low CVs		high CVs		high CVs with P300		high CVs with NfkB
control1	control2	control1	control2	control1	control2	control1	control2
1.6894	1.6606	2.9334	2.9053	2.9334	2.9053	2.9334	2.9053
1.2521	1.2127	5.8851	5.2043	2.6713	2.869	5.8851	5.2043
1.4148	1.4134	2.6713	2.869	4.4895	4.4853	2.6713	2.869
1.4014	1.4315	4.4895	4.4853	2.3749	2.4333	4.4895	4.4853
1.7099	1.6654	2.5495	2.6584	2.6906	2.8488	2.3749	2.4333
1.8048	1.7551	2.1667	2.2055	2.9104	4.1446	2.9642	2.9838
1.4044	1.3977	2.4233	2.5125	3.837	3.792	2.6906	2.8488
1.0838	1.1018	2.6323	2.5397	6.0278	6.7826	2.9104	4.1446
1.6586	1.6661	2.3286	2.3094	5.1989	7.133	3.837	3.792
1.448	1.4529	2.6387	2.6598	4.5055	4.5913	6.0278	6.7826
1.5159	1.5132	2.8753	2.7921	1.9687	1.9876	5.1989	7.133
0.86278	0.86621	2.631	2.7019	2.8975	2.9234	4.5055	4.5913
0.92629	0.99179	2.4062	2.3484	2.3784	1.9352	1.9687	1.9876
1.4669	1.4231	2.3749	2.4333	2.3126	2.3045	2.8975	2.9234
1.0488	1.0706	2.9642	2.9838	10.927	10.91	2.3126	2.3045
1.5902	1.5703	2.6906	2.8488	3.9762	3.7219	10.927	10.91
1.0042	1.0218	2.9104	4.1446	2.8358	3.0551	2.8358	3.0551
1.1192	1.1727	3.837	3.792	2.017	2.1075	2.017	2.1075
1.5583	1.5657	6.0278	6.7826	1.9793	1.9886	1.9793	1.9886
1.569	1.5712	5.1989	7.133
1.4791	1.46	4.5055	4.5913
1.4325	1.4304	1.9687	1.9876
1.7515	1.6397	2.8975	2.9234
1.2066	1.1893	2.3784	1.9352
1.3889	1.4062	2.3126	2.3045
0.95623	0.96998	10.927	10.91
1.3436	1.4134	3.9762	3.7219
1.1717	1.1345	2.8358	3.0551
1.4144	1.4474	2.017	2.1075
1.0874	1.0685	4.8409	4.6577
1.5447	1.5342	1.9793	1.9886
0.75198	0.7446	2.5693	2.8916
1.2339	1.2279
1.1433	1.2346
0.87255	0.85943
1.5965	1.5426
1.3424	1.3941
1.2075	1.3192
1.284	1.2912
1.635	1.6127
1.6658	1.6964
1.5796	1.6689
1.6789	1.6686
1.11	1.1202
1.5153	1.512
1.9762	1.9377
1.1652	1.1924
0.8738	0.88972
1.2164	1.2395
1.387	1.3604
1.3816	1.3711
1.0486	1.0309
1.1742	1.218
1.1265	1.1228
0.93979	0.90831
0.88802	0.90591
1.6187	1.6501
1.1866	1.1742
1.2461	1.2837
1.2097	1.1793
0.72373	0.69748
1.3947	1.3824
0.96481	1.0787
1.0458	1.0666
1.4593	1.405
0.98554	1.0222
1.1097	1.0702
1.824	1.75
1.8148	1.8066
1.1287	1.1097
1.8505	2.148
1.0064	1.0082
1.2193	1.1945
0.98698	0.9921
1.2277	1.2151
1.2925	1.288
1.1827	1.2072
1.1142	1.1455
1.3604	1.4177
0.96354	1.066
1.3933	1.4621
1.5476	1.5685
1.2715	1.2399
0.93178	0.95053
1.3819	1.4796
1.0074	1.0078
0.78937	0.8215
0.92053	0.94457
0.9373	0.93032
1.6351	1.6186
1.5851	1.6255
1.0624	1.0522
1.1997	1.2197
1.2218	1.258
1.5244	1.4975
1.747	1.7788
1.3871	1.3909
1.0579	1.0394
1.0846	1.1144
0.91468	0.92647
1.3069	1.3181
1.3344	1.3211
1.547	1.7145
1.2771	1.2733
1.564	1.6402
1.0029	0.98723
1.2117	1.1833
1.3826	1.4073
1.2396	1.2374
0.90082	0.90506
0.98484	0.98746
1.0444	1.0483
1.2205	1.2456
1.5972	1.5959
1.17	1.1822
1.5477	1.5413
1.1032	0.95985
1.1356	1.1598
1.3019	1.8821
1.6956	1.6869
1.3335	1.3511
1.0424	1.0604
0.8121	0.79991
1.2247	1.2054
1.1464	1.1536
1.1684	1.1587
0.98598	0.98776
1.3572	1.4043
0.88804	0.89639
1.5509	1.5845
1.0188	1.0196
1.0101	1.0434
1.1985	1.235
1.7817	1.8065
1.765	1.7267
1.5424	1.5211
1.728	1.5941
1.2334	1.2553
0.92672	0.94427
1.516	1.4973
1.2525	1.3161
1.3324	1.2634
1.2971	1.1581
1.873	2.0169
1.2494	1.2208
1.3079	1.4225
0.98106	1.2584
0.83408	1.3863
1.3535	1.3242

## Sheet: 6G
log10(CPM)	HGMS1-UMI control	HGMS1-UMI A+L	HGMS1-UMI SAVER control	HGMS1-UMI SAVER A+L	HMOX1-UMI control	HMOX1-UMI A+L	HMOX1-UMI SAVER control	HMOX1-UMI SAVER A+L	mRuby-UMI control	mRuby-UMI A+L	mRuby-UMI SAVER control	mRuby-UMI SAVER A+L
-0.1	0	0	0	0	0	0	0	0	0	0	0	0
0	0.1705	0.066832	0	0	0.19118	0.093913	0	0	0.025388	0.0012422	0	0
0.1	0	0	0	0	0	0	0	0	0	0	0	0
0.2	0	0	0	0	0	0	0	0	0	0	0	0
0.3	0	0	0	0	0	0	0	0	0	0	0	0
0.4	0	0	0	0	0	0	0	0	0	0	0	0
0.5	0	0	0	0	0	0	0.00013873	0	0	0	0	0
0.6	0	0	0	0	0	0	0.00013873	0	0	0	0	0
0.7	0	0	0	0	0	0	0.0023585	0	0	0	0	0
0.8	0	0	0	0	0	0	0.0044395	0	0	0	0	0
0.9	0	0	0.00027747	0	0	0	0.0080466	0.00024845	0	0	0	0
1	0.00083241	0	0.00069367	0	0.00083241	0	0.013735	0.00024845	0	0	0	0
1.1	0.0054107	0.00049689	0.0063818	0	0.0033296	0.00074534	0.024556	0.0012422	0.00027747	0	0.00013873	0
1.2	0.02081	0.0032298	0.016648	0	0.016787	0.0081988	0.041759	0.007205	0.0027747	0	0.00013873	0
1.3	0.061182	0.013913	0.057297	0.00074534	0.049667	0.024845	0.060488	0.012422	0.01096	0.00024845	0.0019423	0
1.4	0.082131	0.044224	0.092952	0.0024845	0.055633	0.036522	0.057991	0.024348	0.015538	0.0012422	0.008879	0
1.5	0.058546	0.043478	0.11584	0.010435	0.038291	0.037764	0.070061	0.038261	0.013873	0.0019876	0.011931	0
1.6	0.082131	0.034037	0.13929	0.028571	0.058685	0.038758	0.073391	0.055652	0.020394	0.002236	0.018036	0.00049689
1.7	0.09212	0.071056	0.13263	0.071304	0.070061	0.069814	0.087125	0.08	0.031215	0.0049689	0.026082	0.00074534
1.8	0.090178	0.087702	0.1189	0.12149	0.075888	0.076522	0.10044	0.086708	0.037875	0.0049689	0.036903	0.0014907
1.9	0.087403	0.10559	0.093785	0.1677	0.077137	0.078758	0.094895	0.11727	0.055355	0.013665	0.054384	0.0052174
2	0.074917	0.1282	0.077414	0.19429	0.072697	0.09764	0.079356	0.12795	0.06687	0.020124	0.076859	0.011677
2.1	0.057575	0.1282	0.047863	0.17565	0.078108	0.1128	0.074501	0.11702	0.086016	0.033789	0.08227	0.031304
2.2	0.040233	0.10832	0.036349	0.11429	0.063679	0.10311	0.059795	0.10658	0.08768	0.060124	0.095172	0.053913
2.3	0.031354	0.079255	0.026221	0.060124	0.050916	0.086708	0.053968	0.088944	0.089623	0.078509	0.10558	0.088199
2.4	0.019284	0.050435	0.014845	0.024845	0.03843	0.063354	0.035377	0.05913	0.090871	0.10882	0.094478	0.10087
2.5	0.012209	0.02559	0.0091565	0.011925	0.02636	0.039503	0.024001	0.03677	0.075472	0.12298	0.089068	0.12447
2.6	0.0063818	0.0069565	0.0062431	0.0042236	0.017064	0.020621	0.015677	0.022112	0.062847	0.13913	0.06576	0.13689
2.7	0.0033296	0.0014907	0.0029134	0.0039752	0.0079079	0.007205	0.0084628	0.010683	0.047863	0.12124	0.053829	0.12025
2.8	0.0015261	0.00049689	0.0013873	0.002236	0.004717	0.002236	0.0055494	0.0052174	0.047447	0.098385	0.048973	0.11553
2.9	0.00069367	0	0.0012486	0.002236	0.0015261	0.00074534	0.0013873	0.00074534	0.038984	0.081242	0.034406	0.074534
3	0.00083241	0.00049689	0.00055494	0.0019876	0.0004162	0.00024845	0.0012486	0.00074534	0.029967	0.054161	0.030938	0.055404
3.1	0.00027747	0	0	0.00099379	0.00027747	0	0.0004162	0.00024845	0.026498	0.031553	0.023446	0.04
3.2	0.00013873	0	0.00027747	0.00024845	0.00027747	0	0.00027747	0	0.014845	0.014161	0.016093	0.021366
3.3	0	0	0.0004162	0	0.00013873	0	0.00013873	0	0.010544	0.0029814	0.011099	0.0081988
3.4	0	0	0.00027747	0.00024845	0	0	0.00027747	0	0.0055494	0.0019876	0.0062431	0.0034783
3.5	0	0	0	0	0	0	0	0.00024845	0.0024972	0.00024845	0.0030522	0.0042236
3.6	0	0	0	0	0	0	0	0	0.0012486	0	0.0024972	0.00099379
3.7	0	0	0	0	0	0	0	0	0.00097114	0	0.00027747	0.00024845
3.8	0	0	0	0	0	0	0	0	0.0004162	0	0.00069367	0.00049689
3.9	0	0	0.00013873	0	0	0	0	0	0	0	0.00027747	0
4	0	0	0	0	0	0	0	0	0	0	0	0
4.1	0	0	0	0	0	0	0	0	0	0	0	0
4.2	0	0	0	0	0	0	0	0	0	0	0.00027747	0
4.3	0	0	0	0	0	0	0	0	0	0	0	0
4.4	0	0	0	0	0	0	0	0	0	0	0	0
4.5	0	0	0	0	0	0	0	0	0	0	0.00013873	0
4.6	0	0	0	0	0	0	0	0	0.00013873	0	0	0
4.7	0	0	0	0	0	0	0	0	0	0	0.00013873	0
